# Supplementary material for: Improving the accuracy of model-based quantitative nuclear magnetic resonance
Source: Copernicus journal article supplement (doi:10.5194/mr-1-141-2020), 2020-07-02
Supplement: Supplementary file 1 [file mr-1-141-2020-supplement.zip]

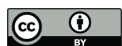

## *Supplement of*

# **Improving the accuracy of model-based quantitative nuclear magnetic resonance**

**Yevgen Matviychuk et al.**

*Correspondence to:* Yevgen Matviychuk ([eugene.matviychuk@canterbury.ac.nz](mailto:eugene.matviychuk@canterbury.ac.nz))

- [mr-1-141-2020-supplement-title-page.pdf](#)
- [OrganicMixtures\\_Benchtop.jdx](#)
- [OrganicMixtures\\_HF.jdx](#)
- [Thiamine.jdx](#)

The copyright of individual parts of the supplement might differ from the CC BY 4.0 License.
