# Supplementary material for: Improving the accuracy of model-based quantitative nuclear magnetic resonance
Source: Magn Reson (Gott). 2020 Jul 2;1(2):141–53. doi: 10.5194/mr-1-141-2020 (PMC10500698; doi:10.5194/mr-1-141-2020)
Supplement: The supplement related to this article is available online at: https://doi.org/10.5194/mr-1-141-2020-supplement. [file mr-1-141-supplement.zip]

Archive with 4 entries (4 files):
- mr-1-141-2020-supplement-title-page.pdf
- Thiamine.jdx
- OrganicMixtures_Benchtop.jdx
- OrganicMixtures_HF.jdx
