# Supplementary material for: Improving the accuracy of model-based quantitative nuclear magnetic resonance
Source: Magn Reson (Gott). 2020 Jul 2;1(2):141–53. doi: 10.5194/mr-1-141-2020 (PMC10500698; doi:10.5194/mr-1-141-2020)
Supplement: The supplement related to this article is available online at: https://doi.org/10.5194/mr-1-141-2020-supplement. [file mr-1-141-supplement.zip › OrganicMixtures_Benchtop.jdx]

##TITLE=	OrganicMixtures-Benchtop
##JCAMP-DX=	6.0	$$ MestReNova 14.0.1-23559
##DATA TYPE=	LINK
##BLOCK_ID=	1
##BLOCKS=	22   
##ORIGIN=	Mestrelab Research S.L.
##OWNER=	yma80
##$MNOVA/LINK_BLOCK_TYPE=	DOCUMENT
##TITLE=	1PulseWALTZ16-H
Sample 1
##JCAMP-DX=	6.0	$$ MestReNova 14.0.1-23559
##DATA TYPE=	LINK
##BLOCK_ID=	2
##BLOCKS=	1    
##ORIGIN=	Mestrelab Research S.L.
##OWNER=	yma80
##$MNOVA/LINK_BLOCK_TYPE=	PAGE
##TITLE=	1PulseWALTZ16-H
Sample 1
##JCAMP-DX=	6.0	$$ MestReNova 14.0.1-23559
##DATA TYPE=	LINK
##BLOCK_ID=	3
##BLOCKS=	1    
##ORIGIN=	Mestrelab Research S.L.
##OWNER=	yma80
##$MNOVA/LINK_BLOCK_TYPE=	ITEM	$$ NMR Spectrum
##$MNOVA/ITEM/POLYGON=	(XY..XY)
5321,5835
8722,5835
8722,8208
5321,8208
5321,5835
##$MNOVA/ITEM/Z=	0
##$MNOVA/ITEM/ANGLE=	0
##TITLE=	1PulseWALTZ16-H
##JCAMP-DX=	6.0	$$ MestReNova 14.0.1-23559
##BLOCK_ID=	4
##DATA TYPE=	NMR SPECTRUM
##DATA CLASS=	XYDATA
##NUMDIM=	1
##ORIGIN=	
##OWNER=	yma80
##.OBSERVE FREQUENCY=	42.633000000000002672
##.OBSERVE NUCLEUS=	^1H
##.SOLVENT NAME=	
##.PULSE SEQUENCE=	
##LONGDATE=	2019/07/10 19:47:02.000
##.ACQUISITIONMODE=	SIMULTANEOUS
##$ORIGINAL FORMAT=	Magritek Prospa
##$MNOVA/SCALES_VERSION=	8
##$PARAMETER FILE=	(acqu.par, ASCII, c:/Users/yma80/Data/OrganicMixtures/2019-04-04%20Organic%20Mixtures-2/Benchtop_Data/OrganicSample1-2/1PulseWALTZ16-H/1/acqu.par, 0)
$$ 90Amplitude1H = 0
$$ accumulate = "yes"
$$ acqDelay = 20
$$ acqTime = 6553.6
$$ b1Freq13C = 10.846058899999999
$$ b1Freq1H = 43.129483800000003
$$ bandwidth = 5
$$ dataDirectory = "C:\Users\Spinsolve\Expert_Ellen\OrganicSample1-2"
$$ decoupleAmp = -12.0
$$ dispRange = 0
$$ dispRangeMaxPPM = 300
$$ dispRangeMinPPM = -200
$$ dwellTime = 200
$$ errorProcDef = "yes"
$$ expName = "1PulseWALTZ16-H"
$$ expNr = "1"
$$ fdPhaseCorr = "none"
$$ filter = "yes"
$$ filterType = "exponential"
$$ flatFilter = "yes"
$$ incExpNr = "yes"
$$ nrPnts = 32768
$$ nrScans = 1
$$ nucleus = "1H"
$$ offFreq = 0
$$ pulseLength1H = 9.5
$$ pulseLengthC180 = 256
$$ repTime = 10000
$$ rxChannel = "1H"
$$ rxGain = 22
$$ rxPhase = 37.8
$$ saveData = "true"
$$ shiftPoints = 1
$$ usePhaseCycle = "yes"
$$ usePPMScale = "no"
$$ zf = 2
$$ 
##$PARAMETER FILE=	(datafile, ASCII, c:/Users/yma80/Data/OrganicMixtures/2019-04-04%20Organic%20Mixtures-2/Benchtop_Data/OrganicSample1-2/1PulseWALTZ16-H/1/fid.1d, 0)
$$ 
##XUNITS=	HZ
##YUNITS=	ARBITRARY UNITS
##FIRSTX=	2500
##LASTX=	-2500
##DELTAX=	-0.076295109483482115298
##XFACTOR=	1
##YFACTOR=	6.9663801341298845132e-07
##FIRSTY=	0.00025983917294070124626
##MINY=	-0.00016596128989476710558
##MAXY=	0.66377216577529907227
##NPOINTS=	65536
##XYDATA=	(X++(Y..Y))
2500C72J%%J%%%J%%%J%%%JNNNONNNOoonoonooRQQRj0j0J54j37ppJ39j52l8l7M9N0j44J48j7
2496C88j6K0K0o8o7L7L8L8L7L1L0n7n7j1j2j2j2M9M8l9l9M2M2m5m5jjjkOONOO6O6q0q0MLM
2493C41LJ6J6J7J6l7l7J16j75J58j7k4k4NNNNN9O0q6q6K1K1K1K0mnnml8l7N0N0J9J9j45J46
2490D65k7k8j0rj5j5j5j5N3N3l4l4M2M3m5m5KLKLl1l0N7N7ooonRQRRp0p0R8R8k25J25L8L7
2487D70k11J37K9K8j5j5j5j6j7j8j8j8J8J9J8J9mllmOOONo9p0P5P6ooopNMMNMMK6K6j88J60
2484D41l6l6PQPQJJ%Jm8m8L8L9j8j8J79j71j8j8M7M7j2j3RJ0j33K16o7o7J1J1J1J1NONOll
2481D16lkk5k4k5k4K8K8K9K8qqqp%%%J%%%JkkkkMMLMm5m6M2M2pqppOONOOOOOqppqppqpJ8J8
2477C92J8J8j9j8j9j8J3J3J3J2qrrrJ6J7J6J7n5n4L3L2J3J2J3J2m8m7L9M0m1m1M6M6n2n2L5
2474C67L5L6L5n2n2QQQQm9m9L8L8J1J1J1J0opppKLKKn9o0Q6Q6m6m5M3M2mllmm6m7M0M0j4j5
2471C95j4j5rrrrK2K1K2K1%j%%PPj4j4J32k16O7O8j7j8j7j7m4m5M3M3M2M2m6m5RJ0RRlmlm
2467C96lmlmJ2J2J1J2M3M2j03j03J9J8J9J8l9m0M7M8jkjjjjkjK8K7o0o0K6K5K6K6%%%%m4m3
2464C39M3M4m0m0K5K6J56j92j9j8J55j94J98j51K4K4KKLLLLLLLLj4j3l6l5J97j52M5M4j9k0
2461D05j9k0j8j7O9P0k4k4k3k4kkkkL0L0n8n7L4L3L4L3n7n6L0L1LLMLqqqqJ4J3J4J4lmlll
2458D14mllononJ6J6J7J6k9k8k9k9K8K8K7K8n0n0L7L7l9l9M8M8j1j1j1j1nononoonM3M4m4
2455C90m3J8J9J8J9j4j5j4j4L5L5n2n3K8K7K8K8p4p3P2P2j0j0j0j0%jj%jjj%PQQPj4j4j4j4
2452C66J1J2J2J2j9k0j9j9N3N3r3r2O0O0k7k7J3J2J3J2PPPPj4j4j4j4O6O5k1k1J7J8p0o9J6
2449C46J6J6J5l6l6N1N1l8l9N0M9p3p3P3P3k5k6k5k6MLLLMLLLK0K0J9K0k6k6k6k6k7k7O0O1
2446D11l8l8M9M9k3k3k2k3MMNMJ6J5J6J6k1k0k1k0kjkjK9L0K9L0o3o2Q3Q3o9p0J8J7mnmnJ
2443C72J%JOOOOL3L4n4n4J4J4J4J4qpqqm4m5M3M3poopJ2J3J2J2rj0j0rK1K2K2K1k9l0k9k9
2440C33K2K3K2K3o3o3K4K4J2J1J2J2nnnmj5j6j5j5K1K1K1K2ooooooonJ6J7J7J7k0j9k0j9J8
2436C57J9J8J8n4n4R1R1r8r8M7M8mlmlj2j1j2j1L8L7m9n0J2J2J1J2OPOOlmmlmmlmRQRRQRQ
2433D04Rj5j4j5j5PPQPkkkkLMLMl2l2N5N6l1l0l0l0POPPOPPOmnmnJJJJl0l0N7N7n2n2R4R4
2429D92m4m3m3m3J6J7J7J6QPPPl6l7N1N1o7o7K1K0M8M7l9m0%J%%nnnnK1K2K1K1j5j5j5j5j5
2426C57j5j5j6K2K1K1K2qpppqpppOONOOOOOmlmmlmmlPPQPm2m2M6M5nnnoJ%%Jonnn%J%%k9k9
2422B96N8N8l5l4N2N3q7q7J97j53K3K2%%MLMLkkK0J9j52J97q6q7K1K1K0K1LKK4K5j78J72k5
2419C90k5J1J1p6p6P3P3j4j5OOK02j47ppk8k9LLLLk4k4j33K15j8j8LMRRRRjjjjk3k2k3k3J4
2416C20J3J4J3N9N9q7q6K0J9K0K0l8l9M9M9nnnn%%J%j3j3QRj46K03OPn4n3L3L4m3m2M4M5m2
2413C69m2J55j95%%O5O6m2m1M6M5j9k0k0k0MLMLMLMLJ1J1J1J2k6k5k5k6J7J6J7J7onno%%%
2409C63%%j%%jkkjkjkjkjjkMMMMl0l1N7N7p4p5P2P1j3j4j3j3mnmmK3K2K3K2p5p6P0P0m8m9
2406C19L9L9n0n0L7L7j2j2j2j2M2M2m4m5J4J5J4J4n1n1R4R4k8k9k8k8QPQQl9l9M8M8jjjjj2
2403C81j2j2j2J0J0RJ0mnnnmnnmpoppJ6J5J5J6llJ9J9j77J72m7m6J73j76K0K1kjkjMMj8j8
2400C20J78j71K6K6kkjkjkkjKLKLLKLK%j%jj%K1K1j90J60l7l7K1K1K1K1j3j3j3j3K4K3M5M6
2396D91j72J76k15J33j9k0KLkklkkkkk%%K2K2j75J75k2k2LKLKKLKLk2k2k2k2J4J5J4J5J1J1
2393C74J1J2mlk00J50OOK8K8k3k3k3k3J1J1J1J1J1J1J1J1k1k2k2k1J4J5J5J5rrrrJ3J3J3J2
2390C92llJ8J9j78J71k5k6k3k4J72j76K0J9kkLLLKLLLKrj0rj0J3J2J2J2ppppppk9k8J80j69
2387B94K7K8ONOOk3k2k2k2J9K0J9K0MNj05K45j25j24M2M3l7l8J08J08r4r4opK0K0K1K0J3J3
2384C93J2J3p6p6R1R1j87J62l5l4j7j6j6j6K0K0K0K0nonnnonnKLKLKLKLPPPPm2m2M6M5j3j2
2381C57j2j3M2M2m5m5K3K3J00p5R7k51J19n5N5N6o5o5J87j63L3L4KLKKm6m7M1M0LKKLm2m1
2378C03M6M6k4k5J72j77K5K4LLj5j4j4j5K2K2K2K2l0l0l0l0k9k8N9N9nnnnJ%%Jk2k3J64j86
2375B82J36l9m9n0J4J4J3J4QQRQklklqqqpM3M3m5m4K7K6NNJ49k01mmrj0j0rK9L0n8n7R5R4
2372D22n0n0K3K4K4K4n6n6L1L1LKLKQQQQk1k1k1k1%JJJQQQQo9o8P7P7l3l3N4N4k8k8k8k7N1
2369C59N1l6l6J3J3J4J3OPOPj6j5l7l7J70j79J7J7k0k1J75j73poN8N9j8j7j8j7K8K9n8n9K7
2366B99K7K7K7%%J%%J%%LKKKk0j9k0j9J1J2J2J2l7l7N0N0j1j1j2j1J6J6J6J6k2k2k2k2M9M9
2363D15l8l9KKKKllmlL0L0L0L0j5j6j5j6m5m5M3M2ppopj%jj%jj%j%jj%jj%NNON%%j%K0K0o7
2359C42o8M7M7m0m0P2P2j5j5n7n7L0L1LLLLm6m6M1M1M2M2m6m5RRRRJ0J0J0J0o1o1K6K7j2j2
2356C27j3j2O5O4k3k3ppppj3j2j3j2K5K5K4K5k5k6k6k6K2K1K2K2j5j4PPj71J78j8j9L1L1n7
2353C50n6L6L7L6L7p4p4J3J3N0N1l6l6J2J3J3J3J6J6p0p1J4J5J4J5QQj4j4J17k32K48j02k8
2350C38k9L7L7K1K0o6o7J6J5J6J6J0J0J0J0j0j1J2J1j48K01q3q3j8j7J28J29o3o3o2o3J00
2348C54J00m5m5K0K0o7o8L1L1L1L0nonok9k9N8N8l3l3l3l3O3O3j99J50j72J77LLrj0rj0M0
2345C86L9m7m8k2k1k2k2L8L8O0O0j95J54m2m2M4M5m2m2L3L2n4n5O0O0k7k8j0j0j0j0OPOOJ9
2342C44J9J8J9l2l2l3l2M3M3M2M3l7l7l7l8NONNNNNNJ4J3J4J4llklm5m5M2M3l4l4N3N3rj0
2339C92rj0mmmmLLMLLLML%%%%%%%%j3j3j4j3k6k5O1O1k0k0k1k0K8K9n9n8M8M8l9l9R8R7j06
2336C67j06J4J4J4J5K3K3K3K4l1l0l1l1Q8Q8n8n8j5j4j5j5K7K8K7K7j4j5j4j5j4j5j4j4L0
2333C13L1L0L1ooonj2j3j2j2J0J0J0Rklklklklooooj3j4P4P4o7o6K0K1K6K6o1o1QRQRQQRQ
2330C54k8k8O0N9j10j09R3R4K1K0o7o7M4M4m3m4K0K0K0K0m1m0M7M8L0L0n6n7K5K5K5K5m6m5
2327C43M1M2k9k9k9k9K8K9K8K9k3k2k3k2J2J1J2J1j0j0j0j0kjjkjkjkjjkjkjkjJKJJJ8J7J8
2324C75J8J9K0o8o8R0R1j14j13P7P6j0j1o5o5K2K2N0M9l7l7J7J7J7J7j3j4j3j3O9O8p6p7%
2321C20J%JJ3J3J3J3k6k7k6k7J5J5J6J5k5k5O3O2n7n8L0L0mllmJ5J5p3p2L2L3L2L3j5j5j5
2318C05j4N8N9k8k9k8k9N9N9j8j8j7j8j2j2j2j2K3K3K3K4l4l3l3l3O5O5k2k2mmmml7l7N1N0
2315C50mmmmM5M5m3m2PPOPj6j6j6j7K1K0M2M2j75J74k2k2m9n0L8L8nnJ7J7j83J66l0l0O2O2
2312D29q4q3J13J13r1r1opopQ5Q4o1o1lkklJ0J1J0J0qrrrl6l6N1N2PQPQo3o4M6M6j22K26n6
2309C97n7klkkNOK7K7j69J80j6j6j1j0j0j0m0l9K44j05l6l6K9K9j4j5QPj69J79j7j7m4m4K1
2307B75K1J75j73K2K3L9L9m8m9l1l1N6N6PPPPn4n5N4N5j42K07p7p7%jj%J0J0J1J0J7J7r2r2
2304B02J97j52M4M5jjjjjjk2k3J76j72K3K4N1N1l6l7j6j6j7j6O0O0q5q5NNK01j47mmO1O2n3
2301C76n3L5L4o9o9N4N4J52j97jjO1O0j35K13j59j59K05j44P3P4r3r4L7L7L7L7k1k2k1k1N1
2299C31N1J39k10J26k24L9L9Q9R0j14j14Q7Q8n8n7MMj8j8J54j96J97j53opL7L6J85j65L1L1
2296D18j3j4j3j4j4j3j4j3MMMMMMMMkklkl0k9P9P9k00J49m7m7K9K9K9K8o7o8lkJ94j55M1M1
2293C83o0o0K7K8J6J6J6J6K5K5o2o2QRQRONK8K8j85J64l3l2l2l3N5N5l8l8K8K8J24k24N9N9
2290C66popo%J%JJ%J%OOK8K8k12J37K8K7k8k9N9N8r0r0J13J13j04j03M1M2J7J6j80J69J7J7
2287D30j58J91MMj19j20M8M8M8M9o0n9K8K8M7M6m1m0K8K8k55R3R9R9q3q3kjjkM5M4m3m3N5
2285C52N5l2l2OOOOk7k6O0O1m0m0m0m0MLMML1L2n5n6O0N9k9k8N0N0l8l8J2J1J2J1k4k5O3O3
2282D51p9p9QRLLLMj%j%N4N4r2r1M3M3M4M3q3q4O2O2j4j4j4j4n0n0L8L7M2M1M1M1r7r7M8M8
2279C62l4l3N3N4p7p6J1J1J1J1J0J1RRRRm0m1M7M7JJ%Jm3m3M5M4qqpqklkkRJ0RJ0p8p7O7O8
2275C47J8J8p0o9L7L8O0N9k40J09j%J0J1J0J1L7L8n0n0j0rj0j0P7P8r0r0J88j60N7N8j91J59
2273C70l8l8k1k2O6O6j6j6j6j6m3m3M4M4O8O9k15J34N3N2p1p2l6l6J60j89P4P5l5l4k0j9O8
2270C47O8k5k5m7m7J37k11P2P1JJJJj0j1j1j1j0j1l3l2K08j42N6N5j03j03P9P8J33k17k0k0
2268B19R6R6m9m9JJJJM7M6m0m1k3k3O4O4o7o6P8P9o1o0K6K7nmnmp2p1R6R5j55J94r0q9L6L7
2265C30L7L6k0j9KKj53J95j97J52j3j4QRp8p8O7O8J6J7J6J7p7p8O8O9j4j4j3j4lllmN5N5l2
2262C92l2p6p6R1R1j92J57m0m0L6L7j60J89l0k9pqJ3J3J3J2QPPPJ1J0p6p7J03J03j00j01N6
2259C12N6l1l2j7j6j7j7N2N2N1N2n7n7L0L0n8n8L0L0j4j5j4j4L7L7j59J89j2j2RJ0POq0q1
2257B29NNNMJ9J8J9J8l0l1N7N6j6j7j7j6J0J1J1J0MMMLn0n1L7L6L1L0n6n7Q0P9o5o6K3K4j62
2254A98J87j39L6M7M7l8l8M9M9l1l1l1l1J9J9J8J9k5k5R8R9k98K83j53J95j16j17p7K72j80
2252C05oNNPPOPn0n1L7L6L2L1n6n6O0O0k8k7J6J6J7J6mmlmo4o4J00p4K09j41n2J21m2m2j29
2249A96K20j09O6J1J1j91J59m9m9N2j22J37k13L48k33l6l7K05j44N2N2j1j2j1j2ooooL0L0
2246C16L1L0j2j3l4l4J62j87J0RnnnnL6L7L7L6o3o3K4K4J5J5p2p2J11J12l3l4k3k2k3k3lk
2243B72J93j55J4J3J4J4k44J05N4N4k8k8L8L8J15k33N0N0L3L4n3n4J4J4J4J4L1L0l5l5j62
2241A81J88r7r6M9M8M9M9jkjkppppL2L1n5n6L7L7j60J90m7m6k4k5J2J2J2J2klJ94j55K5K5
2238C83K5K5k17J32K3K2p7p7O8O8n5n5J12J13k42J06k4k4J75j75K2K2NONOj7j6j6j7j6j6j7
2236B57j6L4L3L4L4L1L2j9j9k96K85j51K3P1j04NON0N1l7l6j5j5P3P2l2l2l3l2O2O2p3J02
2233D07J63m18K32N7j49K4q4q4J01J00J4J3q6q7K45j05P9r5O9O8j33j34P1P0NNNMn5n5R1R0
2231D28o5o4j27K23K1j54J41k09K97n3j33M2J9j54J00J00j4j3RQj46K03j79mN1N1lmj83J65
2229C53j51J98N6j18JKk1k0k0k1MLJ01J02j39L6J23k25J38l5j45K9K1K0L2L1PQPPk0k0k0k1
2226C03m9m9R6R6k1k2k2k2J1J2J2J1l0l0l1l0P2P1j5j6n2n2L5L5K2K2K2K2n3n2L4L5l7l7N0
2223C41N0j6j5j5j6LLLLK4K5K4K5l9m0l9m0K6K6o1o1M9N0l7l8Q8Q8n7n8K3K2K3K2l6l5N1N2
2220D18l5l6l5l5OPOPKLLLLLKLJ6J6J7J6%j%%n5n6L2L2rj0P7P8r1r0llL3L3L3L3k5k5k5k5
2217C23n5n6Q9R0KKK5K4k00J50m7m6K6K6j71J79q8q9K17j32J0J0j2j1R7R7k44J05K4K4M6M6
2215D61p0p1J05k45K41j09k1k1Q8Q8n7n7j0j0rj0M7M6k37J13L2L3l2l3P7P6k07J42K1K2m4
2212C49m4j%k2k2J75j73K3K3o5o4J02J03j49K00q3q4M8M7J35k15j95L86j08j08Q4Q5j41j41
2210A45K91n8pqM2M2j25j26J82j67K9K9Q0Q1o6o5J9J8j77J71M8M8p6p6QPPQkkjkllllJ9J8
2207C22J9J9%j%%k8k7J69j80M9M9o0n9L1L1L1L1l7l7K8K8J40k10j4j3K5K6j71J78j2j3j3j2
2205B89J26k22O0O1L9L9o9p0K10j38j38K11n8n8l7l6Q7Q7n8n8J00J00k42J07K1K0m5m5L9L9
2202C61m9m9L6L6n2n2J01J01k19J31p0K79j57j57L0L0n7n7L0L0K9L0m4m5J01J01j54j53K47
2200C58j02L0L0RQj2j3P4P5j30j29K13j37K7K7NMJ4J4j82J67k8k7J6J6j75J74k2k2k0j9Q9
2198C32R0j70J78k13J35l4l3J84j64n0n0P4P4NMNNl5l6N2N2l0l1J66j83M1M0o8o9N4N4k30
2195A49J19L2L1l3l4L9L8m8m9L1L1L2L1NNNMl7l6l7l7O2O3k4k5M1M1j05j04M7M6M7M7o8o7
2193B42P7P8j09j08R5R5j1j0j1j0J1J2L4L3j99J50m6m7k4k5k4k4Q8Q8n7n7O6O5k1k2lmlmq
2190C07qqpP2P2j6j5k7k7j14j14J25J26KKj25K25j18j18M8M8l9m0K6K5K5K5K0J9j76J72j8
2187C69j9MLLMj93J56NMK7K6o6o6K1K1K3K2M5M4k01J48j35K13j88J62R5k53K5K5LLrrj18K31
2185D25r6r7P2P1m7m6J50j99JJO7O6j1j1j1j1MMLMp6p5O9P0j2j1j2j2NMNNj%jjJ9J8o9o9N7
2182B52N6J66j83j8j8M8M8k0j9k0j9R4R4j46j46L68k13l1l1R3R4n2n2o0o1J06J07j68J82l20
2179A31K62j49K00j05j06K6K6K5K6K2K2o5o6N4N3j43K06p0p0J69j79l3L16l75K06l8l9kkl4
2177B68l3J85j64j48K02j7j7M9M8l8l9P6P6j28j27M9N0l8l8O4O4J3J4k26L55k55R4J4J4n1
2175C16n2R7R7j06j07K5K4J34k16O7O7m2m2n3n3L4L5R3R3j68J81k02J48m8m9J81j69K8K8O
2172C47OOOl3l2l2l2l1l0K53r6j2j1J63j86O5O4m4m4qqqqO9O8p7p7J4J3j82J66N4N4j2j2k7
2170C46k7k7k8m1m2J04J03k5k6k6k6k2k2O5O5k6k6mmj60J89m4m4L31k51o9o8O9O9j7j8K5K4
2167C47K5K5j5j5j5j5p1p0R7R7j76J73k3k3m4m4K1K2J68j80J6J6mlmmQ2Q1l33K49m9m9l5l5
2165B12K38j11o0o0K4K3K4K4L6L6j59J89l2l1rj0j8j9j9j8N1N2j15j16K72p8o3o3K77l05L28
2162E00k2k47J02L0K9J7J7p1p0O4O4q1q1O9O8j8j9k2k2m4m4K03j46K8K9R4k55K25j24OPR4
2160C80R4k06J43n3n4p4p5J51J51k08J40n7n6K5K4m0m1o8K81k57R2M4M4k2k1ONOOp9p8O6O7
2157C36POPPj8j7j8j7MMMNqrqqK7K6K7K6j07j08R6R6j8j9j8j9J8J7J7J8k7k6k6k6K0K1K0K1
2154C33j8j7j8j7k2k2O6O5%%J%l2l2N5N5p5p6P0O9j9k0k0k0p2p2J31J31r9r9M6M7K6K6o1o0
2151B50J5J5J5J5m0l9M7M8K0J9J9K0p9p9O7O6jjjjm5m4m5m5J17J18k8k8o9o8J9K0jjjjjj%
2149B71jL5L5J44k05L5L5J4J3QQp9p9J4J4qqJ73j76K0K0K1K0K0K1j5j5j5j4PPj89J60mmJ8
2146C01J8K4K3K3K4n7n6L1L0L1L1n7n6llllllllrqP9P8l4l3n6n6J59j90k2L26k19J30m4m5
2143C42N1N0%jk60L21k67Q1j09K39q0q1m7m8P6P6J38k12R5k55J41J41mmJ81m00J30J30r9r9
2141B26K43j07r1r1K07j42J94j55K0J9L0K9J17k33J15k34Q5Q6p9q0K63q7opk8k9K4K4n6J18
2138C75j05J85j63J1P8r6J22n2q6R0j08O8n5J20n4n5Q7Q7n8n8j0rj0rL0L0n7n6LLJ84j06q2
2136B44K08j18j19Q7Q8n8n8J5J5J5J4J1J1J1J0%%J16n8j66J26j30M6j50J42j1j1qqP9P9q8
2133C34q8K28j79k2k3n8n9J34m0K32n8j72KJ26j64J42l2Jj74J42J42j88J02O0j14J00p4OO
2131C12Q3Q2r2r2N3N4k0j9r9P5j77J13j77L46j66RK06q5j18N6J69k38L3L3PQPPp9q0Q7Q8%
2129C86%q1q2O4O4j6j7j6j6P5P5p1p1J0J1j87J63L4L4o8o8j11K39m5m5j0j1P7P7m2m2m2m2
2126B26N8N8j39K11k8k8opL8L7m9n0K2K3o5o5K2K3M4M4j87J62l4l5MMK00j49N2N2p8p9J94
2124D75j56O3O3k50R8j1j0O3O4jkk47J01N1N1j5j4k11J38J4J5L6L6O2O2k81O9M5M4k1k1N9
2121C69N9k25J25L6L7q7q7j1j0P6P7o0o0M9N0j42K08p7p6K6K6K6K6k3k3m4m5K03j45j57J93
2119C14N6j19j07O7J49k6j02P3m0m0J78j71j1J64lj77J00J01n6n6m7m7O3O2j30K18o5o5L5
2117C18L4j87j3M0L89n06L09j49K6J53j96K07j41m4J32k22J28N1N1j63J85j0j1o5o5Q0Q0j05
2114C06j05N9j17K27j23J39l5R7k52J01J01k21J28r7K52k14J36m0l9RRRRkkp9R6j43K05kk
2112D10P4k75R6p8J41l4r2r3M1M1K80l01N1N0L6L6k25J23R0q3J41k08%%j10K40R4k55M3M3
2110B76K1K1J2J2J2J2l7l7l8l7P7P8j0j0J0J0J0J0m5m4M2M3l8l7j6j5j65J84j2j2k0k0O7O7
2107C71k6k6O2O1o7o8J9J9m2m3O7O6k50R8J1J1K35l47M5M6K41j08O6O6K3l26P3P4K3K2j73
2105B23J75j4j3QQJ1J2p6p6J%J%N2N2r4r3R5R6j66J82j61J88J3J3o3o4j50J98j91J57MNj83
2102A50J66j39K10o6o6J02J01o8o7j77J72k1k2k1k1K24j25j6j6j7j8R2k57K01K01klk54R4
2100C37M4M4j40j40J22J22j9j9KLj61J88qqj01j02J61J60llr1r0J%JJK2K3o5o5L3L3N5N5k20
2097A72J29P9P8j34j34J2J1K5K4K4K5L5L6j10j09R9R9j84J65k6k6Q4Q3q0q0PPP1P1p4p5ll
2095B98ml%%k40L41k5k6J1J1j03j03K38j10kjj33K17m9n0n0m9K03j46K8K9J50j98lkO7O7p9
2092B84p9J51J52n3n2o2o1K6K6ppppR7R6k45J04J2J2n3n4R6R6j08j08O0O0k7k7M2M2l4l4p6
2090B55R9r7K51j92j7Q1r4J46k8j74Jl9J35j7j7j43K06p7p7N3N4Q3k67L21k8j15j16L2L2J30
2087C81J30j84rK20l61J65J66j32j33jj%jQ3Q3nmk0k0l0l1J69nl00K82j97J52qqo3o2o3o2
2085A31R1R1MMKKk37L44j53j52Q7Q8R3R3l18L2J37l7k6J48K0j56N2j22N1N1j78J71P3k76K44
2083C54O9n0n0n1J24j75J73l4l4Q2k68K49r9J45k03J45k04K22j27k9J45k47J02J78j71K07
2081D53j41p6p6K24j25k7J48J6J6o0o0M7M7j49K00m7m8k5k6J1J1J1J0m6m7J50k00L3L4J1J2
2078B81QQRQQQRQj9j9j9j8M6M7M6M7l0l1qqj43K06p8p7M6M7r9r9J01J02m5m4L5L5Q7k63R8
2075B90R9P0k79L3L4K08j41K3K3j96J54J6J6p2p1K10j38K1K2K74l08K0K0J1J0n4n5j62J87
2073B65j0rKJK4K3j33K16o7o8M0M0o9p0K55r4R4k54P9P8l1l0K6K5M8M8k11J39n8n7Q4Q5j99
2071B12J50m7m6O3O2n4n5l3l3j01K47l7l6M7M6j49J99oop1p2O3O3o0o1o8K81j99J51j81j81
2068H8J40J39J59j89OPo2o2Q3Q3j02j02M3M4J2J2J2J2O3O2j40j41P1P1P0P1n8n9K9K9l1l1
2066C29j62J87O7k82J84j66L52k30j2j2N5N5n3n4K08j41R1R2m17J64j7j8L6L6L6L6n3n3k35
2064B3L47PPR4k55R1R0j35j35R8R7j06j06O2O1J70j79P6P6n6n5J69j81K12j37k8k8J5J6J46
2061D56k02J90j59m1m0K21j27J9K0l9l8K92k89O0O0k00J49m7m7K6K7o1o1Q8Q8j44K04J95l87
2059B13K46j03j12j12K07j41N9N9k03L79j57j57j9L30l67K15J07k43J95J95k26J22j56j55
2057A76L39k43KLq5K64r6r7J22k28J25J25k02L80l15L5K0J9MLMLn9n9l6l7p7K72j2j1n0n0
2055B39N9N9k30J18R0R0j70J79j7j7n8n7N2N2j77J71j99J50j71J77j94J56kjK0K1MMR1k57
2053A82K10j39L5L5l0l0J16J15r1r1J06k44K9K9PPL5L4n3n3M7M8K43j05l5l4n6n6k5k5J60
2050C71j89Q2r2K0J95J5j60o2J13N0N0L5j39K80l01J13o1M7M7j71LJ46k04O8O9J66j84J3J3
2048C33K4K3j50J98k35J13J25n0o4o5K52l30Q8Q7M0j34K09j40N7j18k2k2O6O5lJ71l49%K59
2046D28q9j52K3K84k99J38k12J41l5P9P9k47L35j38j38l1l2J15J14j02j03j5L34k40J08J08
2044D53k41K50r9r1r2K17j33O4O4j24j25P8P9J9K0J9K0p1p2O3O4L7j36J57j91O1O2m8m8op
2041B43O3K37k55R4j03P2JKj48K01k45L36k53R6rqJ3J3j4j4J61j89J83j67L0K9j45K05q0p9
2039B70M5M6m2m1O0O0k7k8K8K9K0l28N0N0K8K8J4J4J4J4l5l5Q8Q9k82L00k7k7m0m0M7M8KL
2037C95q5q5ppQ1Q0k3k4k4k4LLLMNNNNJ4J5j82J66q8q8M06j76p2p2j01K48qpJ23k25N9O0p1
2034C11p1J86j63L3L3OOONj2j3J62j87J34k14K21j27J43k06j0j0o8K81o1o1L8L7j59J90m2
2031C88m3k1k1K7K6r7r8L88j94k08J41R2R2j48j47K1K1P2P2l01N13j49j49M4M4m4m3J3J4k3
2029B82k3K99k83M4M4KKj17N6J55j94rrJ74j75L3L2l8J36j95J55J87l95K27j22P3j02%J74
2027D13O7k82J50J50k64Q5j22N2R3R3k37J11KKK4K5k3k2N4j20K01j48J47k02M5M4j73J76K3
2025C64K3m3m2kkj2j3J52k4k09J40m5m6J72j76M3M3j24j24J21J20k5k4J00J01k23m9J98j51
2023B43J44l1Q7q8%j74J86J2k43J06L2L1j42K06r5r4J20J20l4k09l5L15j74JP0P0q8q8M7M6
2020C41M9j26J69j81pqk9l0O1O0j36K14j14j14K86o3R3k57J04p0K5K6J89j59J36k13k8J47
2018C65j95J55N6N6l8l8l8l8j0j1j1j0K7K8K8K8J2J1o4J09j42K06k62Q6jjj75J74J9K0m6m6
2016B54RRJ29m6j38K12k79P0QQM1K15j98J51k09J41j24K26k32J16p0p0R7R7j05j04J17n8J94
2013D61j54n7J18j29M5n3J21l0l0J99j50j55J93Q4r0j01P4l6l5M1M0j55J93l1l1rj0l8l8Q5
2011C22Q5N7k92K8K8K19j30K47l33M3M3l0k9L01k81K65l17J30k18L99m15Q7Q6J24k26K06j42
2009B57L2L3J4J4qqQ9k60K77p1l0k9j02K46j07j07j36K13l5l4J83j65J8J9mlO2O2k00J49j48
2007B21K02o1o0Q5Q5j19j18o1o1Q4Q5K3K2P4k75R2R2j7j7Q1Q1j22j23J28J27p6p6K0K1q9K60
2004E08q1q2n9o0J0RJ84j65P7k71L02m6m8m9J34J34j28j28M0M0j48K01NOl0k9N7N8j18j19
2002B04j11K38o3o3J04J04m3m3o5o5K40j09J%k9k9k9k9J27J27p6p7PPPPO8O7p8p8J0RJ0Rk9
1999C30k9Q0Q0k49J00q8K60j25j24M3M3L9L9j57J92ooj80J68j8j9LMq5q4O2O1m2m2J90j58
1997B82k33L48j96J52k3k4J07k42N7N7L5L5p9p9K48l34Q9R0L2L1J76j74o5o5J4J3J3J4J%n0
1995B30K99j16j15j45K04j6j5M2M3l30K51j0j0J18k30P5P6j47K01j18j18L69k12P1k78L49
1993D68k33K55l27R8R9J01k47J07o8j12K37jj75l0J44J15k35J91j58j76J72K0K0J71j79mn
1991B48J89j61L6L6j20j19Q4Q4k2k1J64j85K08L4k90N9O0N9L0L0l38K43J3j60J37J38j14j13
1989B09j29K21q5Q9M1j34J20J20q7q8J85j64L0j44K53r7J63j85Q7q7LMl0k9J35k15Q0Q0j60
1986A86J4J89j60J38l6r5Q0K87k94j16K32l31K51o5J09j16j17P7P6J28k20m6m6K43j06L2j42
1984A52K76J01j74J74m34J47NJ80j7j7ooj10j10J8J92k19J31M3M4q6Q9j84J65j95J55J65j0
1982D69j17j16P6P5m2m2R2R3o8k42J39k09J82J83j01j02QQQQkkkkP9Q0p7p6O0j14J80j69N1
1980C08N2K9K9j6j6j6j6k7k7M9j25J76j74L39k43p5p6R2R2j55j55J65J65k5k4k4k4MLMMLM
1977C00K6K5j61J88j07O8lmj4j4J23k26J45l0m1k15K72p7R6R6j22K27r1r2J8J8j40j40J22
1975B47J22JKKKPQk10J38J66j83J55j94n0J24J6J5j30M5J32k17M7j27P6K51k29J20J56j8k90
1973A84K91l5l6l0J44k27J22p5R9j44j45J32k17L94j88j1j0M0M1j6j6K02j47r3K55j66j66
1971A82O2O3j4J61k64Q5J43l2p5p5Q1Q1j68J80j5j6K1K0m5m4j99J50J61j88jJ74j43L2Q5r0
1968C12oj81l7L12j2j86J00p4m9J25j52M29k11l6j89L93k65Q4m7m7P3P3k3J52k66Q3j36K14
1966D33j28j28K91n8j34K14j69OK7j47k6k5K47j02k6k6M0M0qpqpl0k9N8N8j8j9j8j8O9P0N8
1964D80j16J03k45J6j58L20k9m7m7O9O9k14J34m2m1m2m2J62j87K94n6j11j10K67q1j1j1l2
1961B92l3l8l8M9M9Q2Q3j43j42J44k04J37J37p9q0O6O6K9L0k98K84n2n1POj07K41j01j00L6
1959B72L6L5L6n5n4R0R0k5k6j86J63l51K30L4L4j61J88j40K10L1l18J84j65J59J59k62Q6l
1957B91lK0J9l4l3J11J12j46j46K17j32j49K00m1m0K25j24r5r5K33j17r5K54k23J25J6J6J44
1955E10k06J00k50N8N8J5J4J60j88j01K47r0r0J93j56J67j82qpM1M2J50j98M9M8o0o0j0rJ36
1953C73J36j30j31o4K84m5m5k3k3j4j5P3P3n4n5n4n5J0J0K49l32J15J16j25j25N3N3R0R0k23
1950B12L58k74L08l82l3J0J1R2R3p5p5K03j46J02k47J03J03o4o4K0J9J9K0K4K5o2o3j7j8J28
1948C30J28j23j23J02J03j30K20m2m2j99J51m6m6K9K9j67J81o4o4M5M6L5L5j61J88m7m7k5
1946B96k4P2P2j24K25r9r8k6k6L24k58j7j8k1k2J75j74K0K0kkp8p9J62J62k95K86j49j50K43
1944C95j06j9j8J48k01j14K35m6m6J71j77J00R9o8o8J4J5L5L6j77J71k4k5L0L0j38j37K46
1941C61j04OOM5M6j50J98j2j2J0J0o1o1K6K7J6J6L8L8k83O5m4m3J03J04k0k1j56J93m0m1L25
1939E85k57j8j7l2l2L4L3J67j82J4J4klK0J9j40K09J3J3q2q2j6j6J46k03Q1Q1l9l9M8M8N8
1937D23N9k48J02J49k00l30M83j35K14p7p7n0m9R5R6j9j8k15J34M4M5k0k1n6n7N3N2j81J67
1934C63J45k04K02j48J35k13M1M2M1M1k78P1p8R7Q6Q5k45J04m8m9k6k7J35J35k53R5K8K03
1932D80k26J23J6j58J79j70r5K54j93L88k31n7p1J03l5l5j44K05Rj65J79J80l17L2K58r2j66
1930B51J83k32J18m1m1M7M6R9k50L1K04L1l19J11o4J78j72N1N1k33L49o5o5J5J5J02J02m6
1928D56m5j80nK53l29Q6q9K54r5J04k44L94j88q6q6J15J15K03l80r9K50k99K82j11O3p5J00
1926C64j84J65k0k1L3L3j27K22k86K97k05l1P1j03j03P2K40O6k25J24l3l4O5O5Qj66K37j12
1924D12j81J67k58R1Q2r3J26m9M9M9j21K27l45K36k00J50J10k39JKj06K43jj75J24J23l3l3
1922C58l2l3l3l3K8K9l4J41l12K71j78J72J52j97K1K1n3n4K3K3J29m5J40k08k09L73p4J00
1920D86m2m3m2m2K8j46J85j64L73m40nmJ32J31Nj70J44k06R0Q9k68Q2J59j91J64j1j41L3J94
1917C80j56j8j92L39j0J28m6j70j70M70l44J81Om5m4J10o5J32k17J21n3K3K3MLo2o3j02K46
1915D09J12k37%J73j89j5M2M3j28j27L75k06J72j77K6K5MMJ6J7q2K68j92j7K01j48r9P6J52
1913D98j97o9o8K16j34o8K80K7j48n6J19j86J62N0N0j79mm01M12J62j88M2M2K0K0k4k4j12
1911B42j12R4R4OPl2l2P8P7j77J72j48j48L86j95j12O3M3M3r2r2J1J0J0J1N7N8j03K47k62
1908B04L19j42j43R6p9j66J84p1J04j58J91q7Q8J09o5j10j11n6K93r4r4O2O2O6j08K40l41
1906A93JJ75j89L93j85j1q3R1kkj98J51J16n9J70j79m2m2r4K56k27J23j61J87l5l6j4j4M9
1904C32M9r7r6N7N8Q0P9k08J40n7n6RJ0j88J62qqK32j17j18K30k72P8l9l8NNj34K14J27k22
1902B09J03J03o5o4JJQ8k61J60j89K68q0m8m7J8J7J45J45j17j17Q3Q3j21j21K0K0J07J07q2
1900C66q2K7K7j17K33j5j5l11K71k39L44m8m8j2j1J5J6p1p2N3N4p0p0j25K25j69J81mlJ8J8
1897C66r1r1R0R1J00k49K09j40J45k04K55r5QPj88J60j78J71J9J8j92J57M8M8r9r9M6M6n6
1895C02n5K49r9j43K06r9r9M9M9r6r6M8M8M7M8j4j5o5o5j39M42k49J00k35L47k4k4j15K34
1893E37k02k02M03j79j93J56J4J4k48J02O3O3k4k4J63j85J0J1J02J02q0q0K51l31K29j20j95
1891A57L86j89j88K57r3m1m1O1O0m8m9J97j52j52J97j16j15N2N1O3O3k5k4K0K0K0K0n7n6K27
1888E05j22j0j1l3l2M9M9l8l8n8n7QPJ94j56O2O3k04J45k26J23j11K38j11K38k37J13r2K58
1886E16J07m74L10l8Ll45K07K07p1p1J26k24NOP1P0j45j46L7L6L06m3QRj03j03M3M2K7K7l01
1884I9K81qpP9k70J45J45%jk11J38j46j46J00J00rrJ91j58J47J47l44Oo7o7K25j24R5R5j12
1882C14K38m31J50P3P2p3p3q1K69j10j09p9K70p1p1K8K8j68J80M8M9r8r7K28j21J26k23OO
1879B80j61J88K10l72L40ql21K8J51j97J4J3N7N7K41j08j96J54r9r9L81m33N8N7PPN5N6n4
1877C06n3K13j35O1O0p3p4J23k26P9P9k05J45j43K05nnl74M37j9k0kkK0K0j49K00j70J78k67
1875B04Q2R4q2L4L3o5o5N4N5J41k07Q6k62J74J75r9r9j2j2Q7Q6p0o9Q3r1j23K25J17k33k07
1873C4L75j5j89J09o6K49j00Kj73K95k86L0L0j6j5j6j5P8P9m2J33K8l22J26J26k12L69j22
1870D74k96J37J37KKk69Q1K5K00l41K40j85J64o1o1l1L17j08j08p5R9j45K04O9k80J00J00
1868C91l94J86K5K5L9L9K24j24Kj71J59j90J92j58J10J10j15j15J90J90m94L21P9k70l4J41
1866C58k5k6j5j5L4L4j7j7j94L87l43K38p5J00k81O7K85k97n7K92r8r9O9O9M2M3l93M20k51
1864B35R7j21K28l31K51n5n5P6P6k51L30j12j13M8M7J89j60j59J89p8p9L1L1rrrrJ35J35r1
1862D57r0M2l07L62k19N8N9Q8m93J19J20M8M8K67l14J4J3J5J5J5J5l6l5P4k75J58J57o8o7
1860B40OPK03j46M3M3o6o6K4K5M6M7j41K08j56j55J78j70J13J13N2N1l63K18l7l8k41L40n0
1858C28n1l6l6J38k10J4L64j62J87j33j32L8L8m9m9K7K7K09l72J00J00q2q2PQj02K47MLn1
1855B92J24j95J55n3J22rj83R3R3j74J75k40J10J53j95K52l30J22n2J85j65J31k19K72l09
1853A55J74jk6L23l46MJ4j60N2N2L1L1J1j62K19j30qqK97k84P4P4J5J6J56j94j71J77j65J85
1851D05L1j43p7R7Q6q8p0p0J81j67K06j42K28j20n6n7o7J08K04l78L60J1j18j18O4O4m3m4
1849B87N5N5j12O3k10J39j00K48j12k86K53r6K10L4j97J51o7o7O3j11K59r0L1j45K05j44P5
1847C91j01k3k4j5j4K69q1r7r8Q4Q4J5J5k47J02j06K44M4j31j52J96j96J53r3Q3J80j68J19
1845D33k31L2L1l1l1O7O7n8J16j56J93k01J48k12l8J21J21M4M5p4p3j83J67QQK27j23o8o8
1842B81J14J13m4m4k3k3k15J34J34k15N2N2K0J9Lj71K21j28n7J18R6p9K4K5J3J4j18j17K8
1840B27K8N4N4J41k07J01k48J49k6K28j21j09O5l9J36j26K23l69k1J84j66L33j6j55K0M7j27
1838B60K73l09L44k38j43K05o2o2m0m0L2L3L2L3k4k5J94j55j74J76QQK24l57J7J91J3J4o3
1836C65o3j5j4N1N2J71j78J8J9q3q4K22l59K93n6r3K57j07j07J99j51M1M0M1M0k29J21j12
1834B79j13K86k96N3N4j79J71O1O1k2k2k84K98J32k16J6J6k8k7J68j80Q2Q1k7k7p0o9P6P7
1832C51Q7Q7n8n9k0k0k0k0M7M7j21j20K34j15J90j58j6j6N0M9j8j7j8j8Q9Q9l33J6K12j36
1829B65Q1Q2o0n9J08J08k36J13j48j49JL50k47J03poJ5J5KKK34j15k09L73l26K56M9l01o7
1827B27o8J23J24j%j62J88l0l1M5l05J89J90l95J87j11K39k17J33onk52L30j94J55K1K1l50
1825D5K32n1K97j23j24%jQ7Q8j05j05P7P7k14L68l01M8o6o7J23J22k26J22K10j39n9n9Q7Q7
1823D30k43J07J06k42J57J57o8o9N8N7n2n2R4k55N1N1j44K05RRl7l7K25j24R6k53O7O7Q3Q4
1821E37o2m11M07N8j67j67j74M08k61Q8N8N9m3m3p8K70l40K42p0o9L16k65n4K95m09J72k5
1818B72k4K08j41k5k5P6P6l83J98m1m2k6k6J20J20l2l1J87j62r9K51j13j13m4m4L56Pl5l4
1816D31k75P5K65q3J1J1j52J97n0n0k41L41j83J67j07j08Q2Q2j84J66o7o8J99l84L44oj41
1814B72j42L52Mj76j75J22J22p4p4L19k63J33k15L1L2J8J9llJ27k21p6K73l2l3j0j1O0N9k8
1812D07k8q4q4LLJ12J12o9p0j02K46r5r5ppM4M4K31l50J22J22p8p7J19k30J30J30l7l7m8m7
1810B80m7m8J40J40o3o4m5m5J23J22j95J53k39J10K2K3m3m3K2K3K2K3j18j18p3K75K15j34
1807D18R8k50j27K21L52m62J62j88m2m2J14J14K6l22K36j13K21l61M36Q8j90j89J20J20j42
1805B98j42J17J16k25J24%%o6o5J62J63j80j79L17l2llJ12k36o1o2K87o1m8m7K98k84M4M3
1803C87k4k4k4k4K0K0kkJ45k03J02J01k26J23n1n2j42K07k6k6K22l59L83j99o3o3J26J26l08
1801A44M1J86j63O5O4M3M2o3o3KKJ30k20k3k4J44J43L04n11j8L30k58R1L2L3r2r1J07J07j99
1799B85J51l31K51l3l2j69J80J29J29j17j18q9K61j96J53l26K55k60R0nnK08j41n4n4J90j60
1797A92J47k03J01J01P9P9j59j59K04j44L51k30j1j2K8K9n9n9L4L4j7j7k30L51KKP3k76j31
1794A00K19n9n9K25j24J68j81oop5p5J28J28K9K8n9n8p4p3K90n9j67J81R4k55j30K20q6q6
1792A78J83J83j01j01Jl47L77k03J37J37R4k56J1J2j0j1k3k3m5m5K22j28j05K43j80J68no
1790C57M8M8r7r7J6J5L8L7k30J19R0R0k21J28Ml44M45j37K3K3L4L4j12j11J14J15l1l1k5k5
1788C17mlk20J30jjJ86j64l2l2n5K93k6k6k08J40J1J0J41k08J34J34j05j06j9j8q0q0L71k10
1786B69J54j94J11J11n7n7n7n7P2P2j89J59k34J16K8K8J1J2J86j63J93j56o9o9J7J7r3K57
1783D18r7r6J29J29j37j36J25J25j23j23L12l6k59L22j36j36J96j52M4M3l6l6l6l6N1N1J02
1781D72k47K6K5R1R1p0p1p1p0R1R1M0M0l40K41K2K3m9K99n7m06o3K86M6M7o31M14K27j23l3
1779C41l3n4n5RRJ69j80L57k25Q1Q1q2q1n9o0j17K31j10K39J24m57K33j16P1P1J9l29L47k
1777D22J07k42J09J09l86J96O2O1J49k00K1K1j10j10K43j07LLM4M5k39J10R1R2O3O3m66J16
1775B70J67j82J47k02J39J40k04J45n1n1k6k6M0L9J07k42J51j99J85J85k36J12j0j1r7r8K17
1773D09j32q1q2QPK03j45J78J78j63j64N2N3j44K05m3m2m2m2K22j26J43k07j24K24j02K46
1771D89j02j01j4j4R5k54K84o5Q1Q1L1l19J70j78K43j06K65l17j2j1R4R4j32j31K05j45N3
1769B84N2j0j0J14J14l64K18j32j31K26j22J61j87L28k1j89J61p6p5j05K45r6r5K68q1m9m8
1766C80j21K28j21j22J04J04p2p3J24k25J07J07k5k4J54j95JJm1m1Q2Q2l72K09k62L17J10
1764D16k38ooQ3Q3k01J49J31J30j45j46L51k31j87J61LLO0O1l43K39J08k41P2P1n9o0J25k25
1762A58N9N8Q6Q6j17j18llL3L4k74L06K19l62J2J3J21J22J6J6J6J6j19j18J43k06K14j35L9
1760C12L9n0n0l76O69j88j88J97j51J70j79k7k6K83o6j31K18j97J53j%j55J93k86O3JJK3K2
1758B73N6N5j26j27L39k43Q5Q4m7m6M1M0j7j7j8j7M9M9J21k27r1K58k44J05l9l9K66q3j12
1756C28j12J87J86j31j31J4J5j02j02J24J23k53R6K63q6k06J43K30l51J89j60J97j53J27J28
1754E63j56j57j3j4J53J53k97N1J61j89j12K36m7m7j58J91nol9m0J07J06j56j56K6K6J68j82
1752A67L42k40j9k0L1L1L8L7J61m20J83J83l5l6j51J98j45j44J20J19L2L2q7q7J10k40J46
1749C06J46k69L13j80J68RQj22j23K3K4mmk00J49R6R6j22j21N5M04m32L82k90N8JJN5N6r0
1747C93r0l5l6J47J46k18L64k26k25O2O1q3q4J21J20o1o2K46l36K53r5K25j23k54L27k62Q8
1745C63J5J4qql1l0J83j67J39k10K7K8j03K45j36j36J26J26l15K68j0rJ49m33J35J34J47k01
1743C02m2m2L29k53l4l5J39k11L13k68J04J04k60L22r0q9l2l2r0K59q2q3Q7Q6n9n9N7N8j03
1741B96K46l23K58m8m7K1K2j24j23J23J24p9q0K6K5K6K6PPM3M4l35K47q1q0mmJ56j93K58l24
1738A10J27J27q1q2M2M1L04m6k70P8k16L67j07j06J23k27J16J15r5r5J30J30k14J36o1o1J5
1736C00J5J46k03m4L04l8l8k23J26J7J7O8O8j94j94J57J58j48K02l22K59m6m5kjk34J15K33
1734D53l48M58l55J88J88k63Q7j45j44K19j30P7P7r0r0Q0Q1N2k98K71p9K19l62j7j7K30K30
1732E72k62Q6j96J52r9K50r1r2J07k42K16j34K29j21j42K07l1l1j18K31k2k2o5o6j25K23k56
1730A58R3M2M1m5m6J85j65J41k08J51J52p4p3o9o9K15j34m9m9J7J7M0L9M0M0MLMLp8p7Q9Q9
1728D27j56J94j31l05L10l9j26K23r1Q3N4K29j10j10l17L3K33j15J6J6lkQ4Q5j01j01J24J25
1725E29k61Q8Q8q6j50K5P5k74M03j78O1O1j48K02l99J83R3K67k30J18k46J02p3p2J56J55j06
1723C83j06m6m6J61j4j52J96R8k51P9Q0k9l0n9n9J0J84j75J73r9K50l26K3K85o4l92J91J03
1721C68J03j39j39J22J23p4p3J3J4J4J5K5K00l34J5j64J85PPq0K69r3r3NOO4j09J84j64J41
1719D18J41k44J05l37K45J6j59L78K8k98j25L12k70R0q5K1J96J0l39K49P5j03P1M0j34k65
1717C6L17L0L1O6O7q8q7j%NMj51j52J82OK65l17J90j58J97j51O3O3j33K15k82O7N6j18K50
1715D72r9k33J16K56l26K77J03k32n7L7L8k9k9N8N9j58j58K24M9j55J94j22N2L9j35j28M54
1713E67k82O7k02J47N1N1j31j31O1O1j5J59j99J51Q4k64N5K29j97J53J31k19N1k98J58J58
1711C96M9M9j51j51J22J22j50K4j35K13J7j57qL40l08M0J28k22K84o5r4r4P5P5J26k22M8M8
1709C99q3q3K03j46P2P2k01J49L9L9j2j3j2j3p6p6J1J1J49J49l67j9N8N8pqj0j0n4N27l59
1706C87j1K66l15j40K09k64L18l4l5j07j07K73p6k21J27O3O2o2o1LLq4q4J23J23k2k2N3N4
1704D19j1l61J85J84o2o3K41j09j96J52m1m2k0j9O4O5j39j40J92J92j2j2k9l0k9l0k1k0m2
1702B66m3K31j18j18K30p4p5N7N6k27J22J3J3N2N1N1N1j85j86M0L9L02k81M7M7n2n2R3R4q1
1699C63q2OOk5k5J50k00K00j48l6J38j63M19k50R9O4j10k22J26k07O07j96j96q5Q9r6K53k08
1697B71J42l3l3n5n4n9K91P9r5j61J88q8Q7r9P5Nj70p1J02j5j5Q3Q2j48j48J14J13j05j04
1695A79M1M0K3K3J31J32k30J19p7p8n2n2K32j18j0j0N5N5o6o6j17K31j13j13K39j10k0j94
1693G4K03j47K01j49K33j16K4J98j25j26J0RRRm2m2J04J03j6j6n3n3K26l55j7J57p0K79k12
1691C00J37Ql41J82j67L19k63KL51j68PK21l61L46k35M4j29j05M78m13J69j34M49J2n69L2
1689A72L80j71j72J92J91j06j06k70P9Q7Q6n1n2J4J4O8k80J34M83m21J61n7n7M5M5j52J98
1687D54L9L9k22J27j27j26J78j70M1M1J06J06j20j19l3L17j71J79N5k95m2m2K78p1r1r1m7
1685A93L01p4p4J22k27J73j75J44J44o8o8o8o8m0m1K65q4k39J10J75J76l23K6J14k36J27J27
1683D12m1m0j9j8M6M7O8k81K21j28j87J63K28j21j5j5j83J67K05l77N9O0N8N9N8N9l1l0j40
1680B84K09j04j04j7j7J90j58M8M9j21N4q8K61O4k84p7K72j70Mr3K55j04j04J02J03j53K0
1678C21q8K61r9P5J0J0k25n0K33j15m7J29l63j4J95J94p4p5O1O0k8k7l1l2j19K30j30K19m2
1676D39k17J39l6Q9Q8k93K88j16O0j59J91p2J04k46J03J36k13n8K90k11l7J38l7R5k55M9M9
1674C08j80J70J8j56K25N1R0q5q5q5o7o6J08J07k1k1l2k07K77p2K66l16N7N8q8q8J77j71K10
1672C82L5L3L2M4l06J36J36j36L7k59Q9rJ66o9J05o9o9L9L9j79J69K08j41p6p5m3L06n44K69
1670B50K76p4j68j69M67l47L73k10j71J78n4n5K9K9O5O6l46K36j12j13K73p6J06k44L35k47
1668B97N9N8l5l5l6l5llklR1R1l02M8K60q9m6m5M9N0l8l7m7m7L24k5l2l2J42k07OOj5j6m8
1665C03m8M0M0q6q6Q9Q9K0K0j98J51J24k26k9L20o9p0J70m11K65q4j2j1j9j9j9j8l4l3M76
1663F35l39J38m42L19k9K7K7ONq6q7J10J10k64Q4O3O3q7q7K04K04k68k69N02p9k11L72j67
1661D54j67j9k0n6n6M16j66m2m3K9K8k99K83rrM9M9j96J52m4m3M1M1J73j77k10J40j30K20
1658C89n8n8l7l6K9K9K47j02j92J57k65L17k92K89jkl7l6J59j89K8K9M3M3k93K88r0r0L72
1656F41m42r4K56j61j60M51j32o0o0L03m6p6p6j20j20K55r4Q0Q0P4k76L13k68J04k44L37j3
1654D52k68Q1M30j52k95K86m99L16j73M09k67Q2n3n3J87j61j90J59POK25j24OPj96J53m4m3
1652B88R5R4QPr8r9J34k15j84L98o1K89j99j99J28k21kL46k50R9j16K33k47J02K42j07J6j58
1650C23j19N5K95k86j01K48N1N2m18J64K26j23N6j18K21j29K38j10k56R3j83J66j07K42q9
1648C91Q6o2K86m45J37K57l25j53K2j9J57N8j17K11j39j25K25j80J70r8P7k47J03L45m69K95
1646D41n4K0K0kkm1m1k27J22qJ65k41J08m4J31m0k14R0K66J60j89q4R1P0k80K37O2j06P0j03
1644C77j02P5P6k48J01J96l86L37k44K43j07N0N0r5r5l7L11k73P5LJ78m5m4j36j35O8O8Q8
1641C49Q8J9j56J40k09J72j76J34J34j1l60J55J55p1p1KKJ98j51q2q3L54m61K56K55k53R5
1639D24j43j44K20j29K1K0J07J07J67m15K75p3k59R0r9K50J53m29J24J24k4k3O4O4o7o6K61
1637F00l20jjN1N0K0J9j98J51J09k41p3K76j4j5j60j60L21k7n7n7J00k50J44k06K36K35j05
1635D27j06J5J5J02J02k07k06K29j19J35k13L02m6k6k6q5q4L41k41J37k11R2R2j8j7q9r0J14
1633C19J14n6n7q6K63k59R0L9L9Q1k68K48j00J57j91j7j7Q7Q6l27K54n0n1k8L21m14J68QR
1631C62J4J4L9K14n5m04K03j46N7N8J45k04J12J12j35j35K16j33N3j22K63q5j80ok4L26j62
1629C97J2r4r5M0M0J85j63p7R8K2j52J52j96J00J00J87j62J3J3rrNNk56R3j42K07n4n5L8L9
1626B82P0j03j02K47m7J27j52K2r4K55k94N5M4K19MNl12K70j9j9j79J70p7p6K62l20J36l8
1624C36J3J3qj82K57r1J14J14j48j47o2K88J64j85k28J20R9k51J5J5P0j05K18j30J53j96J69
1622D25oo4m12L35J61J25k24j82oJ06o9R1q3J24n0j99J51K70l11J6J6J54J54j02j03j24K24
1620D17l7l7j90J60j55J94J9K0NNNOk4k4p5p5L61m53K24j26j39K10J89j61o1o0j05K45l1l1
1618B76O3k86M13j69M8M9m3m3J52j96J19J18p8p8K3K3j51j52J57J58l9l9K44j05q3K66l60
1616B87j0J20m60M30Q3k81L01P2k78o6K83j28j28O9O9l0k9l0k9Q3Q4J06k44J8J9J8J8j4L35
1614F68l42K41k44J06l2l3j78J71mmr1K58j12j13J01J01k70Q0qqJ3J4J7J6j9k0J87l94K93
1611C94n6R8p5k33J17L49k32k11L72m6m5j84J65k91N8J57j9K9K9pj82L84j99J04m77N50k62
1609B87K02j46o5K85k07l2R3R3j91J58K5j49k26J24j5j5L13k69K34j14RQm48L64J68ok6k00
1607B54m8J26J85J1k74P6J41k07j75J74r9P6m4L06J25k24q2R3j98J51o7J07Q6k63J18J19m9
1605D18m8L9L9k2k1q6q7q5K64J40k09J70m13K64q5Q4Q4L3l16M22l92mJ72l53M62o1J13k03
1603C19J46k26J24j24N1k6k6O1O1j5J59k80O9J89l93K22j27K29j20l2l2J31J32k14l9L72m43
1601A68L45k37K79l02J05J05k23k22J09J10p6K73j02P3p9R5j78J71j4j4O2O2j49j48L22k60
1599B75R0R0k56R3J7j57L1L81j18j18j0j0o2o1M11m03L05k76L8K13j6l65K11K11j71J78k20
1597C01m5J51j98K48P3l63K19K7j46j3j2J00J00p5p5J05J05j57J92l16L2L2L2n3n3K30j18
1595C23K9L0j02j01K33j16j16K33L9L8j03j04j56J8K91n8OOP1k78K29j20k1J52k30J19J19
1593D31k30J59j6O1O1m3m3m3m3JJ%JjjkjN3N4N3N3j34j33M0M1J1J2l16K66J38J38l50K33O3
1590E14k86J22J21l9l9M7M8r9j00P6P5j13j12K6K6J57m24L08m0j91L90O3k85O6O7M5M5n7n7
1588C54j00K48Nl44K01K02m53J30R3R3p0p1L9L8j05K43m0m1j52j53j%L69K0k71P8LLP7P6P3
1586E44n07M37j44J85J84m55j06J77J76l03K78l4l5q5q5O8O7n6n6K73l08o9o9K09K08j04j04
1584B86K79p0k66Q4O9k80K88o2Q6k63K82o7o7o7K1K0J5L64k40k39O8O9R0R0j75J74j10j09
1581B70m2m1K78p0j3l61K13K13k41J08P9P9j49J99k81O8l0l0J15J16k23L59j14j13l5l4j22
1579A98K28j87J61m55N90j51j50K56r3j2j3l4l5l8l9J58j91O3O4J50j98J47J48k74P5l5l6
1577B97n1n0M79j03j54j54J05J06k94N5N9N9J31k18J0J0K20j29l17K64j95J55k5k5J42k07
1575A70l2N49l39J1M0l09L82k00m1m1J04J04k59L23J26k23q1K67m81J00N7N7j04K46r7r8J21
1573C52k28J64J65k58R2P7P6R2k58M6M5j72J77o3o4M6M6KLJ3J3r4Q1j26K22n5n6q4q5M66l49
1571B86n1K98l05K76j38j38K71p8K16j32n6k31J65J66j76j77J48k7j24K26M0M0j40K08k93
1569B74N6J49k00L9M0j82J68M7j27J71j77j06M77k48p3K36O2k15m0J13J12m0l9R1k58j92J57
1567B95K5K6p0o9L9M0j79J70%J74m18J63J31J31j69J81l66K17J03k47o4K84Q9Q8k13l9J61
1565D83j88Q2r4L74k07n5J19k03J46l59j1L37k45J26J26j78J70j70j71K21K22k14k15N8N9
1563B13K65q4o5J09j1j1j8j8j63j64J36J37m5m6K91k91o1K87l6J38m11J71J8J7j13j14L36
1561D67j4L28k53k21J28k9k03K68q1L8L9k97N3J18J17r3r3onJ00J00n6n7M1j35L86m29K96
1559E07k86J00R9j86J64j79j78J89J90j34M1J07k41J70J69n9o0n9o0M4M4j01j01J22J21k89
1557A34O0J98K4j00P5j43j44L04m5J32k18J31m3N5j20J85j63j51J98N3k97M09j74P4j00P6
1555D10r9J74jo0o1q2q3K22M6j86J63q3R1j71MK9K9l6l6L3K08J17m65Q6Q6J22k26j00K49L2
1552D12L1m3m4j52J96j45j46K76p2n1n1J01k47L12l8l20M93j57j57J7J8j44M38k30k31M20
1551D86P1j69j69J67J66l27K54l13K68j09j10J01J00J3J3l9m0p5p6L03k78rL40n31K84o6o5
1548A90N7N7J08k40N1N2O7O6l83J98N3N3k37L44k02J48k9l77L20k9p6K73l2l3J7J7J6J7n4
1546D12n4j05K44ppr4r4J44k05o0K89l2l2j1j1jjkjl2l1l2l1NMrL39k93K88l00M8J47J47n37
1544H5M5Q3Q3j42K06j69J79j91J57m4m5K1L70m21J61N2k97N5N5M70l44J79j70k5k4n1n1k9
1542A98k9M4L92k03k04J01k48L48jl6l5J61j88m8L00l68K14K44l37j19M63m14J68n7n7J59
1540D48j90R4R3k3k4k4k3K3K4l25K56J33k17J40J40k22L60k29k29J32J32l19K62j82J66K25
1538F21l58J40k09J48k02J07J07Q6Q5r9r9K4K4J25k25N9N8j7j8N6k94pL43l12L7M35j47k48
1535B20L33l12L7K2K3k2k1K84k97J67j81n7n8L24k57J79J79l03M6j21K28j42K07l4l3l24K5
1533A12O8O9K36j13o1o2N6N7k57N58k10k10J67m13J76J77j51M32l40K42m8m9j48j49K51r7
1531B93K7K8m5m5L89m24L60k21L1L1J7J7k23J26p1p0N0N1j46K03l7l7j5j5J2J2J1J2j41j41
1529C9K15K16L5l14J81J81m01J81R3R4ml53J05J04RRj66J83k61Q7p9K69J4J3J00m81J19J20
1527C08m1m0L28k53P4P4j09j08K12j37K31j17l0l0n9n9J08J09k14J36o1o0J53J53q6q7p4K76
1525E97m45L70k92N8%jJ85J85l46K36j19j18J79m02J8L67j86j86J11J11Q9R0K5l23K6K5J95
1523D49j54j11j11J41M89j36j36J16k32l6l6J35J35j34j34j0L38l23K6j05K44j05K44k86O3
1521C31O3k86L64J6j01j01P0P1r0K59l61K21o2o3j02K47j82J67m38L76j04K45Pl41K8K9K93
1519E56n7J25m56L64m51L85j96N6N6l0l1L34m80J53j96L05m4ppk28L54j85j84M99q2l95J86
1517C44J98j52n7n7k26L56j90J59J24k25K77p2j58j58k7k6L44nk75L08l21K60k27J23R5R6
1515E08k90O0L61k21q2q2J49m30L59J2J93j55L0L0r0Q5j99J51q4R0O2j14k29L53n08P2L32
1513C63j6j76J72M4l06j1J64J05J06l7l6k13J37J26k24J55j9N6N7J7J7k01J48J87j63k1J53
1511E84k82O7j19N6j14O2l7L12j25N0j25N0j5j6j64J84k58L23N1k98J01K77l24K58j53J96
1509E41j16j17j29K20KJ76q1k56j80J69K48P3m29L86j29M5j00P5RRK0K0j29j30O7O7j90J60
1506C01m8m8R9p6J20k28K57Q2j6j6q5q5R0Q9n8n7N1N1j44K05p8k53J59j5J8j57M6L95k78P1
1504C92j63J86j85J64q6q7k9k8M57l58m5m5O9O9j9j8J41J42k01J49j49j48J56J57k46J04K35
1502F14l47O2O2k00j98L92M3k90K91j12j12J21k28J09J10p9p9K12j36O0O0q6q5K20l62K76
1500C18p2%%J15J15q2q1L03n10K31j18J20J20J1J2k1k1k1k1K9K8n9n9l3l4K28j21R8k52J48
1498C71J49j21K27k52R7J7J7j65j65J02J01K62l21J18k31N2N3J89j59j60J89n2n2J15J15j32
1496C64j31J52j97J03J03j80J68j55J93k00J50J74j74M4M4r0r0j19K30q6K62j04j05n0J24
1494D30k06J42K84k97j45K04j26j26k0J53J91j59P0P0k24J25j23K27r0r0J29k21k1k0K41j08
1492B90n2n1L62k18j10K39o9p0j13O1J09k41M41l73J72kl7J38j90J60J65j83n3n2KKP4k74
1490A27L80k02J40J41l55K28k09l5J19n6K57l25L55k26j22N4J2J2J97j52jl48Q1K58K19j30
1488D19k25n0J79J79j30j30J24J24k98N1J86j64n4n4K86o3k30J19K53r5j40K10k33J16k3J52
1486E09J01p3l0l0j18K31l65j6Q0Q0J52j96R5R5k54L28j3j2k96N4j23K27j70NK83k99K14j35
1484C24J11k38M5M6K47l35K25j23k54L29P7r7j44j44N87k28j64J86l82l3L81k00K51l31K91
1482D27n8j24j24L80L1l98J83K24l59J80j69L40rj59J7J18k30J37k12L15k67O1O0j95J55Q8
1480D12k60r1K58J16J16r8k72K84o4p4p4K32l51J96J96j03j02P0P0l9l9j35M45n65K50J20
1478D98k28j8j8K28l53L63J3o8k43J94J9m8m8K03j46J62j88j3j4O6O6j02j01K37j13J13k36
1476B25J56j93K87k95J44k06L18l2j82J66n2J23j77kK37l44J45J46n30N16l69K13L8L9m7m7
1474B77R8R8j03j03K60q9j42K06l3l3J01k47L6L6m3m3QRk52N62o2o3l88J93J50j99M4M4N9
1472C81N9k76L06k2k1k9k9k9k8M1M1j54J94p3p4L6L6%%%Jn7n6J47J48j08j07j59J91P4P4k7
1469D80k8j22K27l85J98J0J0j50K00j28j28R7R8J08J09k19k19N38n09K98n2k20J29K0K0j93
1467A89J57k44L39l51K31K90k93m6L02n3m03K02K03l87J96p4K75ql58J19J19m8m9Q6Q6j11
1465C69j10L65m48Q2k66M93q7P3P3P3P2j52j53J27k23K79p0j97J52o6o6L1L0k96K85K0K0l1
1463C79l1k0j9K05K06m41r3R0Q9P1P0l1l80L10k71J07k41M59j21L9L9m9m8r2M89l14L5n9n9
1461C19L5l14L41rmmO1O1n5n5L2L2p3p3P3P2j02j02K40j09J7J7j35K13J81j68j54j54J14J13
1459D10K6K6j31j30L06k76o4K85l5l5o4o5J40J39q9r0k50L32j66J83j37K12m00J82K04l78
1457A35J57J56L3L3K9K8j39j39J12k37J26J27p4K76k99N0k17J32m3m3J72J72j49j48J13J14
1455D77M18o28K03j45J81j67q9r0J73j77Q7Q7q0q0L1L1J40J40k05J44q8q8K19l63N32k83J8
1453C98L68l96m7j8j7J13J13k07J43j19j19q1K68J81j68K0K0L5L5l16K66K6K6j02j01Q0Q1
1450D82m25J57J13k36J67J67K2K1j83J65o7o8K36l45M7M7J64j86J20k29O4O4M2M2KKLKj09
1448B81j08L7L8M8M8K6K6K4l25K13K13k51R9j1j1Q0P9J45m37L0L1k8k8K76p2q0q0J07J07l29
1446A48K53N5k95K58r0J76j73K20j29k03J45L6L6j71J78j9j8j39j40J01J01J39k11P4P3kk
1444D01J06k42J56J56j28j27L1L1N3N4l16L3j56J93J84J84j14j14K8K8j47K02k32J17r4r4
1442A93K71l11L44k37k9k8K77p3j3j4j4j4o8K81j18j19K4K3JKJ30k18J01J01l04K77L8l11
1440A92J37k12L04m4l1l0j02K46o6o6P9Q0P8k72P1P0j7j8m0l9J00k48R3R3O4O4p4p4K24n89
1438b7M55j25ppQ0Q0L4l14K23j25J1J0j1j1P8P8k06J44n4n3J14J14o8o8M1M1J72m10K23j27
1435B85K81l01J14k36O8O8K42K42n23K92n02L13J72j77P0P0k59k58L14l3J15J15n1n2L7L7
1433D43k68L14j81J69j15j15J6L64l62K20n3n2n3n2L02k79j8j8p3K76k63Q7Q5Q5k21L61k32
1431C67k32K62q7k7k7R7R7J3J4j53j54J72j77lkJ65j83K53l29K13K12k7k7%%j74J74p9K69
1429F27m36J45LMj57J92P3P2J09m73M67l46R6R7q8K60k56k56J46J46l12N02j32j33k63L19
1427D06N1N0k76P3J12k36R1R1J59m22L41k40L58k25M5M5M4l06M00j82l38K43l3L16k13J36
1425D90l8l9J1J1r9r8J38k10J09J09k14L67k43k43K58r1lL46k55k54QL56j62j62M13m02M38
1423E41l76J54J55j7l65K53r7M16j65o4o3P2P2m00J81L6L6j6j5J12J11l40K43k11J39J96j52
1421D36k62Q8J53J52k83O6L27m87K0K1l0L18m54L61L3L3j88J61ol55L57Rj16j15L61k20l9
1419C41l8kkL03m6l13L7N1k99N02l13j82M00j95J54J69j81J40k10J62j88L7L7J5J6m9m8L01
1417E99k81r7K52k65Q5j28j28M25j57Q2Q2k96N3J80J80m82L33ml54K50K50m51J30j10M72l96
1415B24J85l9L09%%k39k40J23J23j17j17K75l06N0k97J97j49L65J7N9N8J25k25k36L46k00
1413B91J50n7n8J10J09j51j52J54m27M41R2j0j0LKk0k0J12k38M6M5l8l9l9l9J63J63p7p7k15
1410B14J33K5K5n7n7J10J10k26J23J22k26P0P0j33j34L54k27P1k78L40rP8P8j44j44l5l5O2
1408B80M10k44k43K19j29j66J83K05l76J39J40k21J28o9o8P8P9k99M9L93j90L05k76K92k89
1406C30q6q6J05J04l3l4j37M45Jl48K76p2k69Q0P3P2O6k84N20k94M7l02P2P3j67J81Q3k66
1404A50J64J63k61L21l98M15J18k32m41L71m1m1L2L2q6K62j08j08K8K7k55R3R8R7n6n5J0J0
1402C09o3K86l88J94K15l66P6P5J7J7J82j67k03J46K33l49J96j52JJJ98j52j51J97k1k0j7
1400B94j7j7j7MNk13J35K45j04J14J13l8l9j7j7j76J73K10j40k99K82k63Q6N8N8k26L56k71
1398B79P8K7K7j15K33j36j37N5N6l1l2r4r4K18K19k38J11k81O8J31J31l49K33o7o7J88j62
1396B51q6K63k17J33k56R4R4R4q6q6Q8Q8j5j6j5j5L0L1k10L73j82j83L56k25N8N8K2K2k13
1394B50k12J58J58K32l50K61q8r9r9N4N4K5K5J12k36K38j12O4O3j07j07Q9k60Q9Q9j07K42
1392D26j80J70noj03j03K67q1m0l9q3q3K77p2n0K99k59Q9J12k37N1N2j67j66K90n9N0N1k66
1389A35k66M46j35J70j78K87o2j43K07r8r9m7m8M7L96k53k53J98J98j62J87j83j84J06J05
1387C71m17L96j64J86M0M0K0K0l07K75l9l9kkn7n7J17J18m6m6J50j98J6J5k16k16M48j33K09
1385D82l73J22k28N73rl06M3J59j89K21j28p7p7K70l12J02J02J7J7r3r2K33j17Q0Q0k16k17
1383F7L07m2j64M18k15m1N3j23K09L4l09K73K3j53k3j98L26k3l46P02l13m86J46M97j37l11
1381A71j%P5P5M8M9K6K6P3k75PJ82k26n3o3J11J02J01n1J23l19L1J36J35nonoj24j24o9J05
1379B49K27j22lkj01j01J91J90p5p5j62J87k46J03K12j36N0N0j36j35r4Q1K67q3pqj39K11
1377C93n1n2J16k33M39l76K5K4L66k16o3o3p2p2K99n0j87j86K79p0J9J9Q4Q5j29j28M6M7P3
1374C66P3R5k53nnM6l03M61j21L1L2k12J37K8K8O7O8j29j29J46k03J67J67p2p3p2p2O2O2J05
1372D92k43J2L61l01l01N28n4K7l23M44j38P2k76N8N9k91K91o7o7J88j62j4L35k97K84k70
1370C47k69K76p3n5K94k73P6q7K62K2K2l33J7J11J11j8j7j93j92K18K19p3p2R5R6j00K48j66
1368D93j66QRJ83j66L0L0l5l5J18J17Q7k63j75jO9j07K22j28j58J91J47k01K49j00k31L51
1366E38j86J63n9J16l83K00M3l06L21k60L4L4Q6r0K16j33j5J60l31J7J20J20l3l4P4P3P3k76
1364B82K26j23J50k5j06j06M7M7j3j88K16j33j85J63M4K18k76P3L89j93q1q1J66j83L7L7J5
1362D17J6j16j16J74J75j03j04J08J07l41K41j85J64k05l0O8O8J04J04j65j64p1K79OOm3J31
1360E25k51R8P7P6j4j89K50l32m9L01J9j56l6J39j78lm3k18O08k07k25J24q7K63j85J65j59
1358C13J5j70J79O1O2r1r2N1N0l6l7j02j01N52k61j22K27j07j07M5M5o4K85p7p7L2L2q6q7
1355C32Q7Q8j03j03P1P1JJJJJ4J4j83j83J86j63L17l2J7J7j58M24k59k58K65q4j06j06M7M7
1353B63R3R3n02L11k23L58r2r2MNJ79j71L48jj17j18L3L3K95k87k45J04K64q5j65J85k30J19
1351C59j35j36L67k16J98j51L0L1j93J56m1m0k4k3O4O3J08J07o7o7k5k4Q5k65O8O9k81L01
1349C18j8j7J71m10J90J89L7l12Q8k59L92j88J98j52L0L0j75J74M36l79R6R6k1k0j55J94k13
1347C20k14L69k13K23j26m7m7J06J06j56j55J13J13J12k37M6M7O6O6m13M01O6k82J24k24L56
1345E20k26P9P9m6m5J9K0L8l11R6M45j24j25k11J37PPJ37k11N3N3P5k75k1L27o5o5O8O9j07
1343C97j06P4P4j01j01N7N6J66j84k5k6J50k00J20J20l67K14k10L71j17j16K48j01j02j01
1341A90K55r4J03m79M22j60m3m3J82J83j53J97k72L10l88l9K14j35J70j79J93j55K15j33k3
1339C38k2o7K83j27j27j42M40k09k09J62j87L27k54J61j89J46J46j60J90j34j34O2k87L77
1337C84K8K7K8j42j42J49J49j42j42O9M18k83k82K26j23J24J25L0l19J22M72m81J01r7r8J36
1335C37J35j42K07k36J13l60K21J13J13j93J57j49j48L26k4j17j18J43J43l1l2o8o7M1M1k43
1333A62J05J93j56N5N4k58L24l14K69k19J30N7N8r6r5P2P3j02j02J43J44j70j69K32j18qr
1331B55J15J16k56R3ooJ47k03j10K39K1K2r3r3K79p1m7m7M0M0k99N1n2K97l9l9L11k72N4N4
1329E01j58j57O3O3klj26K22K7K6l0l0l0l0J9J8j57J93j40K09p4p5J19k30J41J41n9n9POL2
1326D27l17J70J70j30j30O6O7j99J50J29k21K27j22N2N2l6l6l6l6J9J8J9J9o2o1J13J13j7
1324D08j8j92J57o3K86l91J92o5o5R5R5k52L30l24K57k8k8RQo9p0J05k44K75p5j84J65J06
1322D20J07j41j41j33K15K81l00j81J67J10J10r6r6j17K31k04k03M43R4l42QK68l12K90n8
1320D20l78K03k00J49J63J64j10j10K17l64J39J40r4r3J42k07K29l53L40L41m17o7J01J00
1318D55n3n2m7m7K25j23Lj72L70k11L14k68M5l05P4P3k39L42k53L27k79L03q9Q6j39j39l4
1316A67J41j54J95M7M6j05K43l13L6K43j06j61J4j27j28M25P6k15J34j98j97J15J15J56J55
1314F04m78L37m3m4PPmmj24N1K22j27j81pn4J21L3L3M9N0j58J92l8k12Q2Q2q8q8O5O5J0l39
1312B1K69R3k57R2K33j16J97j52r7P7P3k76N8K33l61M53l00N0J91j58R3k56R9K73O9k79q5
1310B37R0J77j72j30M4Q8q6L08m2l1l0r1r0Q4Q4j3j2k31J19K55r5j38K12k74P6P6P5l1l2r
1307D18j0l33J5K71p9L90j91o1o1O6O6Q7k61l3l2J20J20l9l9j7j7j19K30j7j8L08n06m8L01
1305E11k90N9N9N9l4l4K28j21O2k87L46m68L5L5L18l0K51l30l09N06j60j60m3m3K80o9q4q3
1303B04L68k13K6K7M8M8j26j26M7M7o2o2K22j27j9j8J5J5J6J5L7L7m42O04l34J5N8N9k3k3
1301C33jkn9K90m09J73l9m0J06J06k18J32k62Q7L2L1P4P5k13J36j04K45P1k78K67l15l9l9
1299A40K20M5j63J87j19N6OOk16J34K32l51J96j54J19J18n6n5j58J91j90J59k01k6J13K87
1297E20j21K29j61l34K73R9q7Q8p2p2q3K66j55j55o1K88J47k02M8j26q8K62l97J86K45l37
1295B00P8P8K89k92j40K09k12J37J91l91K30N6l5l5n9K90k18k19J66j83K45j03j89L93q7K63
1293F62k6l75K36j13k24J26l9J36K15j35q0q0p5K74j95J55j37L8k23J25K15L89o33J82k45
1291A73L38j90j6J0L59m8l97R2q3J47J46l9l88K59r0M15j67p6k51M7l00L33j4K95k87J9J9
1289C06k2k1r4K55J90j59k9k9O1O1m2l90L44k38J03J04k54L27j67j67L42pn1n1j63J85j20
1287B74j20K48j01J46k03l5l6M37j45j64J86j72j71O2M11j06j06o2o1K00j50J68j82L64m51
1285B31O7O7J04k46J91j58L8L8j85J63j93J56j42M40j64j64K42l39K13K14j89J61k98N2M17
1283G16o29L81L2N2N2j73j73J12J12n13L01J52j97N0N0JJL7L7k25L57j96j95K93n6j43K06
1281D42j2j2l17K64n0n0J61j88K43j06p7p7PPj4j4K45j03n3n3J09J08n9n9K36j13N4k96J66
1279C89j84P8P8J6J6J6J6k0j9n6n7J97l85K04K03l9l9k14J35j03K46j5j6j47j47R2R3J49k00
1276B87n4K94n1n1OPk95K87m0m1jjo7o6p1K79k01J48j2j2J0J1L2L1n5n5N8N8l79M36l33J6
1274A75K13j37l6l7j24M58j11j12j25K23J3J4j61J88l0l0rqp3p2J31J31j65j65K13K13j51
1272D26j52k02J46J6J6j23K27l22K60K60l22J43k05K38K38l20L0k2k1K4K4j2j2J73m09J59
1270B58J58P7k72J06M54k94k94J05J05j1j0j1j1J7J7N4N4k89K94r9r9j89J60Q7Q7L2l16K00
1268C70K00m9m8j57j58J32k17L57QJ52j96m4m4K63q5j73J76j41j40J28k21M49j34l00K81n5
1266C54n5j64M18k78L03k71P8j6j6j6j6J96j52k40J09P0P0L32k50J0Rj13j14l2l3M48l67l6
1264B28L13k62L21k06k06R2R2o1o0K7K6L0K9j67J82J3J4n3n2K9L0n8n7O4O4Q6Q6l11L8J03
1261C74k46K80o9J7J8n5n6J11J12k11J39J61j89j48K01j48K01N9k90K20l63L40k43J58j91
1259A82J94J94m53L62Q1k68k1k1L6L5J45k04J29J30r6r6K8K8q1q1L57Ql04K77k02J46j4j3
1257D78m8m8m8m8J43J43j19j19J7J8nmJ25k25J54J54l56K26j16K32l99J82K2K2N7N6j47j47
1255B00J32J31j4j5m2m3k03J47j94L88j21j21J91J91j87j87J36J36l36K45m6m6k27L54l59
1253A10rK08K09o1o1k64L17L0l19L64k17N4k95K06K07k53R5j3j3N9N9j38K12j47j46N7N7K55
1251E63r5k76P3M36j45m43J38R5R5k90N9L46ll67M48m33q5L2L1N6N5l2l2RQK05j44m6m6J36
1249C48J35o6o7m5m5j48K00R2R1n3n3j26K24k93K88j6j7j2j2m47L66k10J39K99k82J37k12
1247B15K69q1k66L15n5n5K32j16ppj6j7j6j6n5n4J42k07O9O9K6K5J43k06J2J2j11K37j04j04
1244B73N3N3J05k45M6M6j72J77l4l5J62j87K10j38K11j38J30k20L91j90l16L3L17l2j38j37
1243B25r3K55O8O8k88O1k03J47k8k9J49J48J19k30K52r7l36K44n5n4LLm4L05k55R4J58j92
1240C95N6k93K89o0k4k4L44m71R6R6k23J25j80J69Q1Q2k24L58q4q4k6k6j27K21K5K5p8p7J18
1238D79k30N1N2PQJ43k05P8P8RQj36j37L1L2L80k02k00J50r8K51p2m20L72K3m8m8J49k01K
1236C06L51m64j15K66q4j49K00L3L4l1l2l7l7l7l7J24J24p9q0R9R9q3q3j16K33L7L7m7m7m0
1234C45L10j01j01p9p9k7k6O1O0M0M0p0o9J87j62j62J86k4k4q9K60j42K06p6p7M7l02R8R8
1231C28ooJ69j81K03j46q1q1J65j84J57J57j27j28K14j35J6J5k02J47j3j3j00K49j16j17p
1229A77pR7R8J1J0J2J2rj0M7l02R7R8k6k6L01k80Q7Q8J16m65Q6Q5K31l50Q7Q8J61j89k1k1
1227B83L50k32M9k99J73J74m60L56OOK44l37K96n4k40J08q8q8o9K80M0l09j29K20J33k16r8
1225I9K51j71M11l65K16r6r6J31k17K40j08K18j30J75j74j56J93k22J28K5K6J71m11Q3Q2K65
1223E68q5k43J07J50j99J60j89P3P3N5N5k87O3P4P4RQj29j30P5P4M2M2L5l14P4P3j45K04m9
1221C18n0Q2Q1r8K50l82l3L19k62J95j53J13J14k86O3j33K15j33K16l38J0j9L31j07K43j35
1219D21j36J03J03j59j59N9N9QRL10n05J72j77J06M56l37J2n6n5L2L2J61j87o4K85q4m32L59
1216C36J0pql0k9O7O7k60L21k0k0L9L8k31J18J19k31qqJ66j82J41J41q5q4P0P0k72P7N9N9
1214D23j00j01L44k37J04k44K95k86L83j99k72L10j19j19n3K96o8o8J23k26K98k84P8P8k42
1212A14J07P7P7k4k5K75l06N7N7k58L23j13j12J18k31J10J11M2M2J30k20J28k22p6K73j89
1210B65J60j5j4r7r6m6m5M92r0q3q2P4P4j30j30L7L7K99k83j07K43j36j35J5J6J91j59K19
1208D74j29j30K20j48K02k20J29k73L09k15L68k06J43l59rO3O3Q5Q5l0l0l0l0o6o6jjK10j38
1206B70L70m44J12J12o2o3j03K45l8l9k4k3j11j11K36K37j78j78K15l67L03m7l1l1P0P1k58
1204A33L23lmj46j46J16J16j11j11K30j18J12J13j2l60RL58J6l33M2M3K39j09j38K12r3r4
1202B84J36J36l73K09k28J22J07J07j69j69R3R3j25j25L69K0J97j53j23j24J%O5O6M6l04K35
1200C93K34l21K7L5L4k4k4K15l66K26K27n44N02j65j65r2K56k3k3q9q9J22J21k4k5k6k6k6
1198C40k6K4K4o3o3P5P5J26J26n63K51j19K29j92J57j8j8K7K6J14k35J65j84J86j62j01j01
1196A00L07L06n51K63j4j3Q2k66K57l25K12K11l55K26j4j4J32k18o3o3P5k73M81r9J98j51
1194D31o9o9m0m0L86j95l5l6j97L85o7o6j88J62l5l5P0P1j7j7K1K0j75J73L1L2j73j72K69
1191D25q0o9o8P6r8K62q7K75p3nl53K08L4j52K3r4Q0PL56m54J27j99J49J14J13l88J94K77
1189F00p1m83L32O1j13N8N8k44J06p0o9o8K82Rj66L6L6J78m04J77J77P5P5k97N1P0K44l59
1187B81j0k2k1LKP9P9Q1r4J91j59K8j46K8j46l7l8L45nj96J54R8p5N2k96J50k3K30N6m63J17
1185B43l5J39k43J06K53l28L70k12n2K97k08l3K6K7n0n0M6M6rj83m5L05o7J08k56R4n2J23
1183C60K45l37J75J76j00r9p8p7Q8M36k21l95L34k46J78j70n5n4n4n4N11n37J91J91K58l24
1181C42j8j8J81j68K9K8PPOPp8p8M01m12NL54l72K09j53J97L7L7k05k05K83o7j1j1N5N4m7
1178C96m7j34K14j67J82j66J82l09M0K37j13L3L4p7p6J81J80n2m02K42j06K20l61K4K4l4L15
1176D60j16j16N8N9J29k19M2M2J22k28J22J21M0l10K58r1K6K6l23K58l9m0k4k5L47kk13k12
1174A52KJk0L30q6q5J11J11kkk85O3m7m7K22j27K14l67K6K6J24J24k90K91j01j01J09J10m7
1172D09m7k5k5pL42k61Q7l04N10k89N9R6k53J46J47N8k91J60J60m93L22k46J04MMMMQ6k64
1170A97P9P8p6p6j1j0L38j1j34K15l80l1N14l00p5p5K16j33J29J29l73k4K30j18j0rJ64j86
1167B57O2O2K24l58l1l1J59J58j26j25J69j80L9L8j43K05O7k81M65l49j30K18J44k05J2J3
1165C33j4j4J60j89J03k47K12K11k57R1j34K16k15J35m0m0p5p4P1P0M9M9J57j91J4J4qpk6
1163C54k5O2k88L31j8j85J63m6m6k5k4O4O5k78P2R0Q9K4K4nnK35l47R4R4q8q8N4N4j21K29
1161E09j94J55l24K57r0K59k5k5k21J27o9p0k9k9M07m07J93j56K51r7J05k43M04j77p9p9j15
1159B38j15K20K19m42L72m1m1m70L43Nl44M90r1P4P3j89j88K98n0J02k47k5L24o2o1J37k13
1157C16J81j69r5r4L56k26J24J23q0q0J62j86L1L2j41K07o1K88m73J09n2n1P8P8R9J00k33
1155C43J16m87N58l13K68j60j61K40j10q8K61k71P8P0P0j64J85j21j21K00j50O8O9j21K28
1153D87j65J84n7n8p2p2K27l54K3K4L64k18K1K2kkk41L40mmj12j13L1L1J0RK01j49J35J35
1150F21j65j66K13j36k46L34j4j4l9m0J65m18K85k98L35j4L1L1j66J83k22J27j56J92j02j03
1149B18K9K8p3K75k26L56k10J40k97K84m33L81J41m40J23J24j09K40j52j53K84k98J00J01
1147D33l94M20l2l2J9J8k1k2k18J31M7M8k73P7J53J52k9k9M0M1J27k22L8l12N98m50j5j5K47
1144E25l35j4j4J54J53j3j4j01j01K0K0J9K0K0K0M2M1k62Q6J73j75l6l5J35J35J75Jm68J13
1142B84j19K29j95k2J56j93Q0Q0J74j75o6K84l08M2J03p1k26N89j71Mj05P0j8j7m9m8R7R7
1140E06q7q7N9N9nnj29j28j15K34r7P8K90k91j57M25o4m12K56r2K52r6n3K97l0l78L34k47
1138C17LL52l96m8R5R4k98K84j16j16J23J24j00j00J04J04k5k6l6l6J73jj76J73j10O4j72
1136B54J76k43L38p6p7J39k11j24N1J58j7ooJ43l2l48K34m4m5N4j21L15k67P2P2j12K38k43
1134B72J07j9j9q4q4J23J23j49K00k10l4R2R3kkjkRJ0j66J84k89O0K06K06j40j40K53l29K31
1131D99j19j33K16k49J00J21k27J9K0l1L18k08J42k08J42j87J61L15k67p1p0P4P5R1k59ML
1129B71K67q2j48j47J5J5K12j38P0O9j48K01r8r8j0j0K75p4k19J29r2r2J34J33n7n8l5l6j73
1127G6J77K64q5j07j07L43k38M0M0j93J56k2k2%%rqq1K68R1k57J57j92N8N7j60J89LMP6k73
1125B45P6P6l3l3L2L2j34j35K78p2K13l70L35k48K2K1J51j99J43J44k84k83M06N8j15j15J83
1123C94J83j57j57J05J05m2m3m3m2k1k1j0j0J03K78l88J94q8K62m08J74k42J07L5L5J03J04
1121E10j22j22k64L17k28L53o8K81k39o4p6p5L17J43k83O7k65L17j21j21L1L80n66K47L7L7
1119D23j38K11j60J89k42J08o8o7PPK14j35j7J58k90K92q7q7L6L7n1n1P3P2J14k35J35k13
1117B35J23k27K29N3O1k88l3J41k1L28j77j77P0O9j48K01O4k85P9P9p6p5K67q3j%N3j20P6
1114D17k73R5R5L4l14L91j91K21j27j9L30k14k15O8O9J2J2O2k86J14J13NMn6n5l10N03j12
1112C73j12Q4Q4n7n8J39k10K5K5N3k95J65J65j99J50M2M1k4k4q0p9Q7Q8k34J14j47M35m7m8
1110D56j1j1p5p4K16l66L08k74K34j14j10K38J07m74M28j54J80m02L26k3J29k20O2O2j05j05
1108B28P6P6K22l59L59k23j9j9O8O9k16J34j04j03J21J22j11j11N6N7r1K58R2k58J46k04k8
1106B38k9J4J4N1N0k82K99k7k8N3N3K93k88J5J5n8n8K75l07M3M2n2K96l57rp8p7J47J48o1
1104C35o2k5k5j17M63n39N07m8m9p1p0j8j8n4n4L27k54K70q0n5n5R1R0k36J12j06j06K21j29
1102B45k0k0KKJ98j51O2O2J72j78k00J50K14j34k8k8n0n0K8K8OOJ36k12K02j48p4K74l36K45
1099D03k66Q3M17j65k86O3L4L3O1O1k44L37k58R0m8m8l0L19m4m4l30K52j84J64k6k5J05J05
1097E29k84O5J4J4r2r1J7J7j19K31J79m03j9L30r8K50j50j50L30j8j24j24N1k99J56J56j1
1095C57j1o1o0K88k93j28K21K07l76K97n3J01k49J05J06j78J71j47K02J37l8k55q0j59M21
1093E25m20J62O3O3J18n7k31J18LJ77k88O1q6Q9J1J2j1j1L09m1l63K17J53j97K9L0j5j4J43
1091E49k05J00J00k82O6J43k06J55j9K50l31j59J5O7k82K78J05L6L5PON4j21k12L71l10L9
1089B49M3M2l3l4J35l9j48K01k0j95J79Nj46K9PPN6N6o8o7n3K96m6l94L83L5j69J81j27K22
1087E87j35j34j50J99KLj9j9J99j51p9K70j92j7J%J2J2m4m3J13K87n76K38J11k38L14l6l5
1084D80k10J87J2j99j99M47j34k69L13k06l0j6j90L50Kj65J83J21n5k18J31p7p7J0J0K41j08
1082C34k0J53M7j29K02K8m15J66k7k6J9J9J9J9l8l7j10K39J1l38R4K69m90L23O1j12N5N5k60
1080A11Q8K84o4k18m3K45P0k57R1j68J81k01J48l4k08K25N0q3R2J90J6k89O1j00P5M4M5j1
1078C40j0j23K26m6J28k17J32n3n4k0k0O7O8mll17M98p2p3j93L89j91j7p8p9M7M6k19m5K68
1076C75q1K13j35k77L05r4r5M36l78j9J57N9O0p4p5n3n3N6N6k53R6N3N2J51j99K38l44J87
1074C64J87j40j41N1N0K9K9K07j42N4k95K83o6j82j82J19J19n6n6O1O0k66L15kkJ2J3Q9k60
1071B52q6K64m8m8J49k01Q5k64L25k57J17J17j30j30L44k37R0R0j02j01R5k55K55K55l63K18
1069D34j08K41k09k10J0J0R8R7K0J9M1M1j46K03K8l20Q1Q1j37K12j37j37N9O0j9j9j9j9R0
1067C45R1m8m8k84K98J68j82p5p4K38j11K35l47O8O8j16K33j38j38R2R1m53Q25k74k74O0O1
1065C11L51k31RRl3l3n4n5J28k22L02k79K03K04l23K58j24N1l3l3K2l28L56Pj5j5J37k12J56
1063E14j94J41k08K75l08R6p8QRL47k35j51J97J18m64J39J39k02L79l52lJ49J50k62Q8k2j96
1061G4K67R1k09l6Q5Q4Q1k68L74k07j96k2K54r4r5Q0J70j80j35L8N9M07n37K77oj80K64q6
1059C54j20N5o6o5J53J53j96J53k45J04J7J91j63J2j96J54Q8q7J79j70k05L76j70j69L20l0
1057D27j92J56j49K6K76l05M4M4PQlklkklk4k4J70j79J8J8j17j17M06N8l09K72r9r9Q3k66
1054A18L34k48J81NLKj34K14P0k80M2M2K0K0j0j1K5K6l48K34R3k57J89J4M3j31L1L0M1M2k22
1052A78J26l3J41o3k37P5P5J20J20m3J32k31J18j65J0J09J09k00J50k06J42j40K08j19j18
1050B58L17k64J34J35J4j60J46m36Q3Q4lkm3L06j52K3j26K23m24J58Q6k64M89l25J00p5K69
1048E51q0R5q0Kl47J69j80J56j9L6L6J85j64j85J63M0l10J71j79L00n0l8k13K72K73j93j9
1046C92k11J38J27k23K09j40K09j41J23k25J45k04J04J04j73j72M92l21P1P1j98J51k3k4P3
1044C54M22k11k10N6N6J2l36K85k97J18J18o8K81j40j41K57r1k37J12kjK0K1o5o5N9N8k32
1042A33L50o4o5K3K3q7q6K72p7k7k6Q3Q2j21j20J25J25l32J6m2m2J48J47k66Q3R0R0JJJJq
1039D31pr5r5NNJ80j70K23j26M8M8n5n5p0K79l54K28p8p7J09J10j30j31q5K63k0k0J22J21
1037F04j40j40J48J47j14j14K4K4N3k96K36j13K43l39Q8Q9k68Q1L20k62O6O5O5k83N8N8JJ
1035C02KJK6K7q2q3J61j89j4L35j29j29O8O7K0K0j77J73j3j3RRK6K6M8M8k61Q8j60j59N55
1033F02k60K3K4k4k3J72j76L1L0RQj22j22L43oP7k72R8R9j34K14j34j34p5K73k94N6K4K5J99
1030E31l83J79J79k35L46l57K24J08J08k10k10p2p2L28k53N2N1J04k45K56l25K18j30L13l7
1028D68j39j40J3J3P4P5k60Q9M54l61K49n63M96q5j14K35o6m15K10K10q4q5LLQ1Q1r4r3L1
1026B86L2j64J84n5n5K94k88L1L0j15K34j61j61L84L5k76L06k18J31k18J30J89j61l09K72
1024C57p7p7J76J75j16j15l4l4K50j00n8n9P3P2J27k22k5k6K2K1m4m3p2K78k89O0P0O9j04
1022B55K44k03k03K26K26k52k53K71K71n3n3kkk85N29n62K53l5l4J6J7J0J0j86J63J2J2K73
1020F65l08j03j04L5L5K7K8K67l14K15K16l07M1o2o2o3K87j50j51K64q5j72J77m1m2KKKJm5
1018B55m6K82l00J45J45l92J89qpO5O5k33L48j76j75K86o3o3o3K55r4n1n0j32K16J08k42J87
1016D51j63j84J65J8J9k00J49J41J41k38J12m1m1J66j83R6p9J28k21J28k22K9K9K13L9k06
1014B46J44L8L9q2k56J81m00M96q4k52N63j75jmnj61j60K44j04R2R2n4n3J53k0k18J32q6q6
1011B19R3q2K56l25K15K14n91M53j59J90k14J35m7J28l59j0K72R8k66L16j31l06L96j85M6
1009C56l03L30k52P4P4L43nk47J02j59j59R9J00j15j15J37l8L61m52J00p5J87J88k92j17N08
1007F30n39J90J5j59J90J5j59J58j8j5J59k55R3J92j57K21l61L12l8k37o3J62J61j47j48J00
1005C02J00J03k46J1J85j57J8j31K18j31M3j49K00p3K76m93j43L49KJ75j74R9p6M5M6Q8Q9
1003E76j06O9M4l06K14l67L20k62j7J58J11k39J79j70l2l2L05k77J27J27Q4r1k00J48J08o6
1001D05N3j21M4j30J94J8m04M10ql57L0L0R6R5k1k2j1j1RJ82j88J61j24N0m8m8r1K58k10J38
999C79j45L1J21J21j92J57k42k42K53K55j60j60M07j75j13O2J34k14K2l27M72J23k18J31K2
997E02K2l92J89J58j92R6p9J28J27m61J20J09K83j21j20j55M28l59rM8M7R1R1l59rJ14J14
995D11o6o6K1K2JJj07K41m2m3k0k1k4k5k4k5J8J7K13j35j33j33J87J87j73J77j95J54j82J67
993D03J02k48n6n7M6M5K03j46n9K90j64j64K4K5o9K80K08l74M0M0o9K81m32J51j48K01PPj68
991A99J82o8o8K96n3j9j8k37J12J1J0j64J85N8N7k62Q7n3n3J14J14k6k6K5K5l76M39k81O7
988B77j79J70k02J48J30J30O5k85j73M08j44j45P5P4p0p1O5O6K25l56K45j04k71L11j2j1o2
986C04o2J22J22j03j03J18k30K49r9J11J12k89O1L8L88k23k23j0j0P7P7L2L2l18K65J74j75
984D37qpj17K32j31j32J90j59L64k18j8j7n4n4n4n5L3L3M4M3j74M07j79J70J0J1j83j83J01
982C32J01j61J88k41J08L91j90N7k92j08K41j74J76o8o8J50j99Q9Q9J7J7l00K82k4k3n0L00
980F40L8l11n0m9J25k24R7R7p0p0m9m8R7R7J1J2l66K15L78m35J68J68k21J28m6m6j37K12j81
978A80J69p1p2m2L07m8m8k6k6O6O6k39L42k96N3J7J7N3k96M23j58j76J73ONP1k78K68q2K08
976E66j42j27K22l23K59k57k56M50j30J97l84M03j78q4q3K98n1k9k9j%j97J53N9O0J03k46
973B53O2O1k44J06L0L1O7M15l75K06k96N3M6M6j06j07L2L3N4N4k42J07J43k06K37n77M61J13
971D57QQp3K77n08L07j08j08q8K62j32j31L47jj54J94k26J22j62J88m4m5j09K39k77P2K03
969E18l78K21j28K50r9j86J62p7K72p1p1k02L79m2m2l11L8K20j28KKM1M0J50j99o9o9J05J06
967D34k16J32m1m2j48K02j7j7M9l01L83L4o5o6n9K90m44L71o6o6mlmmN1N1j23j24N4N3R0R0
965D74j04M77m54j04M4M4k2k2Q2Q2j2l62K33K33l70K11k13L70m24J59L0L1KKj51J98q5q6%
962B63%K17j31j37K12ooK3K3k83K99l01M8O3O2n1n2L85m30K51r9j28j28J61J61k09J39N0N0
960D46q1q1j12K36m7m7L5L4j83J65K54r5k04L77k01k00M6M7k49L33ONO2O2m39J42OPR4R4J01
958F13m81J59J60j94J56j72J78J41k08p7K72k64Q5J07k42J51J51l08M2j48K00K6K6j06j07
956A60L45k38j57M24q5q5j03j03J59J59j15j15J68j81L2L3j2j2R1k58M84l31O2O1R9k51J81
954D12j67QPJ71J71k08k07K4K4K4K4M5M4m4m3K8K9l8l7n2K97k2k3k70P8L18l0m27J55RJ0Q6
951C96Q6jjj5j6k55L26j26j25N7N6PQPQp4p3J3J4O8O9r9r9K20j28M6M6M1l08K66q3R7k51M6
949B23M7K01j48M8M9k9k9N8N8L1L1j73j73p9q0L93j88L8L9J99j51r3r4J68J69l14L6p4K76
947D39k31J19R0Q9j17j18K97k85J23J23jjo6o7l71K10N37n10j90J59K01j48J07J06l93J88
945B90K02j46o5o5K77p1J79m03j56O59l05M5j01j01L3L3K07j42P8k70J51j98L45k36O9O9o1
943C17o2J71j78j88L94m3m2MNNMm9m9j58J91N0M9k49J00q5K63m2L07o07M40j78J70k75k75
940a0L57k25M01j81J%K6l24L89L9k0k0m2m2J00R9l14K67o2o2J05k44l4L15j86J62r9r9J04
938D01J04n5m05K28K28o5o5Q1Q0o5o5J31k17J1J1P7P7l8l8K7K8m41O05k45J04k10J39k54R5
936B64K60q8m16L99q4q4P6P6k02J47J68j80n3K97rrj42j42O2O2o3o3n5K93j61j60K02j46J03
934C52J03J32k17k3k2M3M3K8K8K9K8m9n0L7L8q9q8j40K10j43j43L51k30J05J05m0m1K20j29
932D48m2m3J64j86L2L3j79J71k01J49j43K05K13l69R5R4k25J24k4k4j11K38n6n7J40k09K00
929D37j49j71J78J41J42l67K14o2o2J20J20m9m9k97N3L66m49L15l4n5n4M8M7J10k38K77p2
927D60O3k86L03k79Q6Q6o0n9J39k11l5l6K06j42K35l46K08K08j48j48n4n4R2R1l9m0J06J06
925D52q4q4L9M0J19k30N4N4r4r4L43k39j21K27l32K50o6o5L5L85j87j88L65k17N5N4o9o9L1
923C64L1RRL9l10J48J47O6O6j59j59J68j80K56l26J18J18k8k7Q8k60Q2Q1o9p0J13J12J27k21
921C33J71j78k6k5o9o9L17l2m0l9M6M6k60L22k37J12k66Q3K24j24j6L34k00j99K80o9k7k7
919C65m9m8P9Q0L34m80M2M2R9J00l01M8m6L02N9k90J76j74J57m24M77J28l01M8q3q3M9M9l8
916C17l9M8M7j49J99N9N8j74j74L17m98Q4Q4K11j39Q0Q0j79J71k6k5L9L9k45J04N2N1j22K26
914D96j08j07P4k74L67k15j05K43K9K8k33J16j9j8J77j71J21k28L68J9k56R4j6j5k05J44m5
912B61L04r9j00r2K57m15J67J02J02k94K87p7p6K68l13L5L5k51R7J05J04p5p5J87J87j44j44
910C43k31J18r4K56o5o4J61J61k97N2P5P5m8m8J7J7j79J70j12j12O30o50J84J85j21j21K02
908E04j47k26L55m21L93k24J24l7l7j5j6J6J6K12j37q9q8J96j54L31k50N6N5k9k9l0k9pqk40
906D5J09K73l10K36j13K10K11j90j89N4N4j2j1n9K91k84O5r4K54j23j23N3N3N3N3r5r5j68
904A48J81J32k16Q8Q9j31j31K10j38J24J23k04J46k82L01j15j14K08j42J64j85K5K6j8j9Q6
902C56k64K96n3k60Q8J54J54j40K08p5p5j04j04K96n3PPP3k77J07k43K60l23J41J42k37J12
900A93R8R9q4q3R1R1k50R8M8M7J92l89M9M9J3J2MMK87o2r3r2j66J84q1q1J45J44lkl30K51
897C83K6K6k5k5J7J7p1p0O9O8M0l10K94n5j06j05K24j25J73m09K75p4K82o7KLk16J33p8p8
895B18N4N3L33k49J3J3k74P5n6K93j52j51J10J10j95L87l41RJ35J36l01M9J86J87l81K01j44
893C18j44m3L07O1O1r9r9j42K06k96K86j57J91k01J48l89M25j86J64j35K14m7m8q1q1L77m38
891A72J50J50j1j0L2l16o2K86m06M06N8N8j82j81l6L13k03J46J46k03K09j39N7N7j89J60q6
889C76q7L17m97M9L97k24J25n0n0o2o3n5K94p4p3j5j5j80M01j65j66L55k27q2q2q3K67j27
887B04K23k1k1k39L43o1o1J36k14L16k67M0L9m8m8J12k38L56k26j18j17N44k71j6j6K7K7j18
884B67j18P6P5q4M97l53nLLj98J52j53J95q1q1J81J81l70K12j67J83QQN9k90K58r2j79J70
882C57j13K36q5q4l1l0J14J15j89j89J89J90n7n6n6n7R3R2j6j6k40L41j60J89k25J23n1n1
880C33J7J6J25k23Q7Q7J16k32m2m2L51k31p5p4K30j18J30J30j83J66m95L19M6j28J24k26p3
878A35J02J42k08K84o6m4m4L3L2r8P6k26L56K3l25q6K63L8L8r7k71M96l19J9J9J25k24J28
876C01J29j27M9K34j16O7O6k64k64O7K42j17K31k94N4J28k21L59k22P2P2n4k27K59r0m3k17
874G4L17l2r6r5R7R7j06O9l20K61k64L18o0o0J36J37k46p0K16j33k3L25l56j81L23J49J9j56
872C40J27k22N6N6j63J87opn3k28K66q4K11K12l40RL9L8k25J24J23k25J1J2K5K6l12K69M0
869C06M0q5Q9q1K67l61K20p8K71j33j32J95j55j89J59j10K39P6P6l54K29k44J05J49J49j89
868D59j90j24K26J6J6j08j07J43J44k20L61m97L18J00m82L59k22L3L2L76k06o0o0K59l22N6
866C00N6k32N83m79L36L5L6j54j53K11l71J60J60k5k5k22J27J4J4j82J67J50j99K0J9R7R6
863E39J0l40J89j59J24J24k37J12K5l24R9J00l1l2K10j40N7N7r4r5J90j60J07J06k35J14j79
861A37J70k6k7J16k34K03K03k06L75m82R9o8o7K52r7j1j1N4N4n5n6l4l4j43K06nL44m93Q8
859B52K48l33M17j64J48k01m6m6J28k21J41J41m4m4q3R2k24L57l13L5l7l7N9N8k8k8M2M2l4
857B77l4L6K10k23J27k94K88o4J10l23M92k39o5J18n8j55J94J17n8l5k10K48j01j30l04N13
855D37J64k94j19J52j97K06K06k39J09k11k10L29k52P5P5L7L7J86J2m05M10K8l21R1k57L16
853C65J42l32j58J99j51M12O2l66j7J06J06K3l27K76J01k30k29K94K95j11j12N3N3l39K42
851C57o5K84k11J39l34K48k1k1k22L61k8J46n03P9O4O4r2Q3j47M35k56R2o7o7L0L1j87J61
849C53J13k36LMj00K48k74L07n9n9K8K9J90l92k16L64M1M2J00k48PPN1N1N9k89L28m85N00
847D67q1K32l50j34j34M48j34k7k7j50J98k04J44l1L19k19J29k63L19k22J27j85L96k23k24
845A71J84j65R2R2P0P0J1J0k95K86j71J79k65Q3q1q2k26N87o4o3l4l5P7k73R9R8J9J8o9o9
843B54L5L5kjK80l01K6K6k9k9K63l20J56m25J55J56M0L9M0L9r8r9R8R8j86J63j20j21M3M2
840B57o7K82j68j69OOK20j30O7O7j13j14L45ml1l1p4p5K00j49r8r8J69J69j52j51M2M2J9K0
838B87J52j97j%LLJ12J12L3n47L52L53l55pM81l34q7K63l27K3l6l5R5k54J47J46j80J69J34
836E05k15LLQ6Q6j98J52j3j2l18K64O4O3m5m6P7P6k44k44J46J46%JL4L5j61J87m4m5Q6k62
833A67J09J10j15j16J70J69j72J76m8m9l11L9J44J44K0K1n6n6J40k08K7K6K7K7j39K11l14
831A43K69J0J0m1m1k1k1j3L35k06k05q2K67J40k09J18k30J00J00j03j04L00k81K20j29J49
829D75j99m7m7K76p2k2k2L3L3n5n4onJ54j94L91j90q9q8k2k1K04K04m86j38M08N9m94L18J22
827D26k26J06J06l53M62l17L1J69j79Q4Q3ll53J10J09%%N3N3r3r2J23J24j67M15n83%PL56
825D51q2q3Q5Q5m4m5p3K75k46J03l34K48J16k34K17j32m3L07l12L7J16J16l35K46o0o1O3O3
823D44J7J7l10K71J5J5k32J16M0M0M0M0n86M59L8L8j70J79j92J57j83J66o0n9M10m05N4N4
821D13J4J3p3p4K3K2j37K11K90n25L05k78j30K19J53J53k33J15q1q2N5N4j42K07j17j16q8
819A71K62p1p2J18J18k05J43j99J51J27m55O87l60j1j2J56j93j96L85m01M14k14J34j57j57
817A63J71J71l45MJ24J23K19j31l29K0K02j47K0K0k4k3K08j41L3L4J08k42J52j97R5R6QRj28
814B73K21K06l75Q5Q5K0l30J91j59K12j36L0L0RRq4q4N4N4m07M05J08k41K63l19L50Jk76P4
812B69p9p9K81o9J21k28J09J08j16j17J05J05J92l89m5L05j31j31J81J81m07J74R2R2p6p5
810C73j24j25J16J15J43k06J50j99M10j72j86j86J76J75j22j22L48k33J16J15k01J47j00j00
808C08j79M04j28j27O9O8p6p7P6P6k66Q3J50J49j86j85K89k92L61k19Q5Q6m24J58J29J30j7
806D45j6k23J25r3r2K13j37j58J91J52j98J30J29k03J46N9N9k48J01K8K8l26K56J5J6n5n5
804B89J42k08m9n0P4P5J16J16j68J81rrl9l9k68L14k11J39M3M2jl50J62J61o4o3j0rl1l1J74
802D19j76J96j53P9k70J89J88k36J13Q4Q4k82O8J7J6kkk4k4J23k26J96J96l12L7O6O6j92J57
800C95j27j26K02K03j31m80M27j53K61q9r5r6Q6Q6k1k2m3m3K46j03p4p5K17j32j33K17j31
798B66j31P3P2K16j32L39k41l45K38o1o0J63j86K07j43N4N4k29J19k08J41K00j50j55M26l37
796A90K44o2o3J33k15L01k80L30k51P2k76J08J09K58l23R1R1n2n2J65j83p2K77q6q7k04k04
794d1K67K68L2l18K79p0j51j50M17j65k6k6n5K95r0q9J29k21noK57r3j8j8p7p6L49k32k10
791A56L71j96J53p2p2p8K72j28j28KLj07K43p4p5j61J88k9k9Q0Q1n5n5n5n5M5M5J55J54l45
789B34LK08j42J1J1j1j1k5k6L01k80J27J27j71J77j14K35j43j43J0J0RJ0k6k6k5k6J0J1K94
787F19n5n9n9j68J81k24J25p2p2J55j93m9L01r2r2K14j36J2J1l3l2K79p1k52R6j42K06n5n5
785B88o3o3N19k95K6l24J78J79O7k82K57r3L2L3L2L2k28J21p5p5K4K3J98j51J91j58k17J33
782C09K85k96L1L1J60j89k10J38K64q6j2j3RRJ0Ro3o3KLJ02k47R5R5O0N9q6q7J47J46j51j52
780C09L27k55J60j90J91j59J6J6j11j10J14J15k07J42o9K80m06J75J54j96N7N8J08k41k21
778E7J27L68m47J46J46L0K9k07J41n5n4J39J40m13J69Q2k67K49r9PQj5j4N8N7J45k04O7k82
776A08L29k1l30K51M8M7J4J3l14K67pqk11L71k20k20K16j33J15J15K8K8l63j4J90J90j89J61
774D61p2p2K70l12K11j37L1L0j36j37J43J44P8k71O0O1J7J7J11k37K86k96N6N7m6m5p8K71
772D65j98J51n1J24m00M15j74%M0j34J75Jq7Q8j19N5l2l2N7N7J8j58M32l83J52j98K15j35
769C44j45K03k22m7j9J57M5M6j40K10K3K4k01J47k77L04k08J40P4j01k00J50J41k08P1j03
767B08K96k87o8J06R6R6Nl44L64k17Q9q6J07o8r0Q5P4j01RRn5n4L3L3K8K7p0p1J25n0J36k14
765A51K28j20n6K94q7q7k9k9j69M13j77J73l10L9J08o6M4M5L3L4p0p0J8J8J7J8J7J8o5o5K2
763B90K2k2k2l2l3K17M1K16l65j12O4q2R2mmQ4r2K35j15j73JK03K04n13O8K85o3j26K23m4
760D43k18J20k29n1K98L6l13L16k66J74jk20L61l15K67N5j19l6l5M22l92m3m2J92j57J48J49
758E44k64Q5O3k86L48jJ09k41QRl5l6J36k13j7j7J48J48n5n5qpqqk9k9J16J16m1m0j9j8j35
756B68K14k87O1J54j94K3K4M7M7j17N8j32K18K25l57j2J63l06N08l87J94r2k67M21P3k36J12
754D23j79J69q1R3j56J93QQp4p4n2n3j63J86J49j99L09k72J42J43l43OK45j03J40k09J11J11
752D78l5l4J6l32J60J61j22j23K70K70l63j4m9m9k31L50K24j26j6j7k92N6K02j47J33J33r3
750D10r2m1m1j07M75k01k01KLm7L02llJ37k12j5j6O1O2m8m8J33k17L0L1J64m19M55l60N1N1
747B96Q7Q8j04j04K0K0J47k02L21k60p2p1M59n88M12O3j26j26Q4Q3q3q4K35j15r9j00L58k23
745C16J05J04n6n6n6n5Q4Q5j19j18L9L9R1R0l93M21k34J16l5l5N2N2O7k81Q9k60K93n7j00
743A88K49J16k34K25l57J55J56q5q4J0J0j2j2J72j77llK24j26P1P1p6p6l17K66RRO7k81K9
741A84K9j23M58k46J03n8n7J07J06o8o8J53J53l49K33k26k25K18K18j36j36L8L9j11j11K60
739C85q9j6j7K89k92RRL00k82K7K6l2l2K08j41P8P7k10J38n8n7QPm3m3M13m00j39K09O1O1
736D54j28j28L17k65O3O2oppoONk27J22L57k25N8N8k45J03Q2Q2j75j75J46k04N12l02j9j9
734B89j46K03PPJ46J46l33K48k52R7l03K79j10j10J22J23k61Q8J61J61o2m12J93J92k3k4j11
732C15j12J22J21n4n3L4L4r0r0M18j64j86J63k53R6R6R5j82j82J09J08J1J0J1J0j11j11K7
730A92K7L70k11k76P2K73p7k73L09p3p3n8K90q1q1k20J30M07m06P3P3p4p4J00J01m7m7J9J8
728C83J81j69K8K7k1k2%Jl29K0J95j54J27J28J9J8j07j07K85o3k38J11J54j94J70j78mmN9
725C16O0k31L50l00K82k05J43j63j64J49J49P6P5m48L66j33K15m6l96L51Kj43K06m73L42L0
723D10K9j69M14l79K02l67K16J86j63N1k97J90J90m83L31k86K95j31K18qpk62Q7L27k55r5
721B44K54j24j25j7j7L54m60R2R3NNJ96l85J38J38l78M38j09j08J50J50j70j70J63J64j79
719C42J70k14k15J85J84j01j01K2K2j99L82N5N5r6r6r6r6J43J42k58R2N0N0j24K25j62j62
717A99NNm3m3L49k32K07j41J06J06l1l1l66M49k68L15j30j29K59r0r8r7J7J7L9L8q5K63n00
715I0Q2M18j64o2o2LMm8L02j71j71mmJ3J2P9P8J76j72o4o4Q4Q4J8J8k09J40k16J33k57L25
713C91j12K38K32j17k18k19J37J37m5m5j40K09k70P9J65J66m23J59j74M07j08j09k28L53l01
711A64K81q1q1J01J01r2r2nnm3m3K84k98R4R4l0l0J7J8J92j58K2l27J46J45R7k53L1L1noQ2
708C51Q2j8j8m0m0K2l26M58j23j8j7R1k58L62m53J86J87p1p1q6K63J23k27J4J4j28K20K5K5
706E29k4k4R3m89N56m90K00K00m22L92j53j53R1R1k51R8O7O7n6n7PPj4j5K32j16o6o5O5O5
704C65j96J52j68J81j91J59L9L9m8m9Q7k63M36j46o1o1k50L32O2O2q7q7mj78M58j23l41K40
702C59l6J39k67r2J12J11K7K7q2K67j53j53K50r8q9Q5j3j2j51J98l26K57nmL1L2K5K4l39K43
699C67L15k68J33J33m87R4J60j89n1K98l45K36J8j56k2J53j61J3r6K53j0j0q7k61K13j36L88
697D95j94N3K28m19J62J13o1j88j4j14O0M68l46K92n22J98J97r8K50j20j20k0k0k0L29l90
695A99m2J95K0j82J68j8j8r3K57k02J48k65Q4QJ82k48J01Q9k59J94j55R6K71j5j5m0m0J74
693E94m07J52j96M67l47K41l40J34J33n5n6j33K15r0r0K99n0j67j66K28j21P6P5J6J7j58j58
691A13K05K05n35N10j67J83k54L28l32J7J0J0J98j50o3o3J83j67QQP4k75R6R6J40J40j52j51
689B15M9M8j26K22k02J46K78l05J40k10K78l04k4k4J15J14j3j3j3j4K0K0klJ76j74%JJ31k17
687C09m3m3J98j50M6M6r0r1M8M8K24l57K75p3j38K12pol1l1l1L18l55nJ90j58J28J28j84j85
684A92P7P7R9k50J46J47j81J68n51M94p2p2N6N6P7P8l31J7O9k81M76j07LKJ36k14j7j8k3k3
682B30J37k13M21j62j83L99j07j08r2r3J63j85J20k29J37J37k20J30j54M28j47j46j83J66
680B46N8N7M5M4j51J97j51j52M5M5J11J10k16k17L44k37O8O8J07k43J28J28JJj08j08K35j13
678C42J05k45J74J74k2k2p1p2J25J25k78P0o1o0K03j46N0N0j06j06O8O9j57j57M39j42J36
676D85k12n3n3Q2Q2k46L37j1j1j71J78k9k9pqp2p3J02J01j10j11O3O4K0K0J07J07j70j71j8
674A93j9K62q7J32k18J15J14q1q2Q5Q5l9l9J83l98K12j37J1J1m8m7M06j77k20J30J5J6J5J6
672D09L3l15K52r7r3r3l5N47j18j18j33j33L78m36J96J96l6l7J24k26K26l56M88r5m36J46
670B38P3P3o3o2o3o3J97J97r4r3k9k8N9N9N7N7qqj89J60l56oM20j62r6K53j18j19K08l73L27
667D48k3k33J16O7O6k82O7P4P4N9N9l94M19j47j48J38k11P2P2P4P4l84M30l0l0K1l28K89o0
665C49n9o0L3L3l3l2j24K25k98K83O5O5n8K91n77NL32j8N3N2j52j52K88k94L3L3K7K7n9o0
663B18Q6Q5o0o0Q2Q2J55j95j88J61L0L1j52j52K70p9j00K48J03k45n5K93k22k22L10k71L83
661E36j99k2k2O5O4J08k41M2M2L5L5n2n3J23J23k05k04L97o49M69j12m1m2R7k52L32j8j0j1
659C35j76M05k85O4N5k95J28J27llllKKm8L00j29j30j59J90opooJ74j75N7N8l40K41K41l40
656B65POq0K68r7r6K88o0j32K18q8q8J4J4p3p3m6m7N6M04l65K18n2n2l28K54k33L48l35J4
654A29N8N7K1K0K0K1M2M2j03j04R1R1q4K66m13o4J40J40o0o0J21J22k95K87j8j8k30J19J26
652D64J26j92j92K59l22K71p7L22k59L0L0k03J46r6r6L5L5j38K12J4J5l6l6k83O6M60l54J77
649C78j73L1L1k09J40J89j60j4N67n38K76n8n8j60j60Q0M29j31j31k18J31PPj67J82K4K5J0
647C30J0K86k95J04k44L48k33L12k69N9O0N9O0l64K17J30m52K14K13j21j21j60J88K10j39
645D02j85J65j05K45o4o3J0l40J63J62Q9R0l58K24r2Q2j87J62k3k4j7j7j8j7Q1Q0j41L4J55
643D93m27K71R7m5m5K38j10j93j9j09M73l35K47m14M00j47j46N0M9j7j7j8j7m7m6R9R9k1k1
641C22p2p2L88m26L16l3l0k9n2n1m8m7J09J09j02P3J59j89jj75L23k6k03J47N9k90l4L15j2
639D28j2J44k05M2l06J44J43K31j17r5r4J8J9N6j18J76j73J6J6J69j80J85j64J08k40N8j17
637A32M07m07K51P6m0k14J16J17k00L82l72k4J15J15k06L74k72k72J53J53O6O6j4j4P3P3j53
635D81j53m06M06n7n7L00k82J08k40M3M4L17l1j98J50J30k20l71M41nnP5k74K95n4q3q3J26
633C97J25j35j36N1N1j45K04m0l9MMj35K14j50j50L51Jo4o5o6o7P8P9Q6Q6j18j18K7K6N6k94
630A18K44j04NMj00K49k97N18j62J87l73K09k22k21K15K14j16K33k83k84K91K90k62Q7j79
628B61J71j14j13K68q1K38l43nnj2L37l02M8J72J72l76K06r9j00j43K06p8p8J24J23J%k39
626B39J11K3K3r5K54N1k99M6M7K4K5j28j28p8p7N05p7mml86J96K18j32Q8k61J96j52M6M6J99
624E16j51R5k53K91n7p4p4P9P9m4m4l06K76J49k00J20J20j0rrl58K29j20N5N4Q0Q0r4r5M0
622C65M0j56j56L89M0k50R9j63j64m5L01P0P0q3q3J10J10o4o5nnj80J69j98J52k4L26l37J3
619B76J2J3N0N1k76L05p7p7O9k80K92K92m27J54k75L07L8l11J25J25Q9k61K32l51L26k3o3
617C35o3K42l40J68J68k2k1k36J13MMm9n0N9N9l01M9J42J43l0k9K61l21L30k52L9M0JJJ50
615E94k4m14M01j55K0j2J63l24j50K57Q3Q7k63J33m3J87l95P4P4N9O0j73J77j07O8J6J91l61
613B23K20k83K98k43o9QL56k29n4J34m1O9O8j37j37JJL23k58L45k37j64M18l56j83K07j42
611A38L49%j93j93K65l17K99n0K3K3L9L9j35K14k26J23k58R0J25m9ooL1K05k63Q5k6k5J71
609D72j79K82o8J32m50K16M1K0l30L4K07Q8Q8j46j47K17l64N41k73O2j13M3j31M3M4OPk12
606A30J37J81j68J37k12J47k01J69J69j42K07p6p6p8p7J30m5k8L21k46J03j80nR3q1R8p5J31
604D63m3k28J21K53l30o2J12j09j10J67J68l0k9J97j53M4j31J11o4K56r3k33L49m69L45j1
602D91j85K91k91L0L1P1P1r1k66K03j46M2M1j55J95j61J89J4J4n6n7J29J28j83j0J66j84O7
600C88j08q9K60m94L19j9J56j63J85j10j09J37k12O1K35q1q1J7J7O1O0j25K25j20N6N5j19
598D02J61j87kkj44j43J47J47l6l6l6l6K00K00m25p6L19l0m8J26k88K93k19J30o1o2J13J13
596E20M1l09O9K44j78l52j40M39n4K95n08L05j0j86K69l12K49j00J58j91O4j10K39O5n4n4
594C99o5o4L6L6J56j8j89J60o9o9J96j52m4J31k29n4J49J50p1p1L50m64L09k73L24k6m08J73
592C03j90L92k21J28o8o9J74m08L13l7j50J99m0m1K08j41k35L46l77K04K77l04j38M44j30
590D39j30L03k79j70M11l37J2L86m28Q9q4K24j24Q5k63L04m5j81J67J09k39L29k53j80J69
588C14K86k97j32K16p4R9j50J98j95J55J98j51k59Q9l0J44j18K31k26n3O8O8P8P9o3o3o4o3
586B85K7K7P8P8m53L62r7r7L9L8O0O0j80J70j36K12j00j01m3m2L61m54N36m6j36j36K06j43
584C75l04K77n1n0r2K57m9m9J39k10R4k54R0R0L09k74N5N6j26K22m50L65l63M52j84J65l08
582A82K73N0M9m66L48l12N02j67j66J55J55l97J84l05K77j3j4J02J03l48K33k08J40k15J33
580B75J6J6j58J91k3k2%%PQR4R5q0q0Q8Q7j82J67l93J89K34l48L87m27J66J66j69J81j27j27
578B31J9J9J84j64L2L2l4l3J85j65q1K68r6r6j4j4J83j67k6k7J26k22K42j06O8O8n0n1k48
575F3J02J20J20j20j20J37J37N0M9q6q7q7q6R5R5J46k03KLn6n6L61k21j11K37O0k90L43k39
573C58J17J18l19L0J43J43n19O3o7K82N6k92R6R6p1p1M1M0j41M40j34j34j0j1Q5Q5j98J50
571C76L2L3k66N48m52L61k63Q5m9l98L73K3J09k41K61l20K44K45J9n62K42j08K71l11J76j73
569B55o4K85n3n3N5N6j51j52ooJ84J83k16J32j43j44L51k31R4R5l41PJ09J10p3p2J47J48n6
567D50n7l2l3l2l3Q1Q0ppo3o3K42j07k28J20M8M7j52j52L56k25J75j75L06m4m44J38M58j23
565E24k16J33m9m8K35l47O7O8q7q8L13l7j46j45K54r5L01k80o3o2Q3Q2q4q4K75p4m5m5J15
562D55k34K03j47K7K7M9M8n4n5J41k07J32J32j30j29j06K43p7p7j30K19K05l78M8M7N4N5j6
560C45j6P2P2n6n6j2j2J21J20q3q4J0RRJ0l4l5K50l32R0R0K5l24K09j39K31j18L7L6n0n1r0
558B44K58j42j41Q7Q8J60j89p6K73k07J42j25K24l44K39k20J29l0l1o7o7J29k20J01J02o7
556B50o6J36J36K6K7l87J94J30J29k16k17J62J62n3n4R2R2m8m8m8m8Q6Q6n9o0L1L1n7n7K8
553C80K8j46K02N0k99Q6Q6k23J26k6k7M0M0L9M0J09J08k92N8j4j3j01j00J51j98J07J08r1
551B28K59k66L17j29j29J48J47%l48J67J68j85j85R9k50J86J86P7k72K36j14J27m55K46K47
549E05k63L20j77j76J22J22j68j68K32j17K2K1K2K2J71j78k5k5m2m2J39J40R5k54Q8k61M34
547E59l81J8J9K14l69K5L73j10j10j25j23M09j72M32l83K67l14J58j91P7P6n5n4K77p2k54
545A91L27m14J68K19j30K1K2k84O5N4N4j1j1j1j1J13J13l42K40q7q7M7M7O8O9j31K18l20K8
543B25P9Q0j61J88j70J79j91J57RRJ17k31M7l02L23k6N16n32n1n2J34J33l97J85O5O4j02j03
541A92J19J19q4q4m0m1M8M7N8N8j24j24L82k01n5n5J74m07N07p3m3m4PQP8P8J3l36N7N7j39
539A52K09k8L20l27K56j85j85L3L3k89K91K40l41M41l73Q5Q5k11L71j02j03o3o3J33k16J00
537B63J01j18K31m6m5O3O4j31j31J89J89j48j47k93K89J24k26N8k90J66J67J23J23J4l35n2
535B02n1N4N5R1R1k20L61k70P8L6l13L06m4L8L8J26k24nnm8m9K24j25p4p4NNNNN6N6P0k78
532A22L66k15R0R0p7p7J19k30K18K18k39k40J84J83k0k0l0l0K1l28J17J17M5M4l17K64o3o3
530B49J07J06l9m0j04j05R9R9p6p6P0P0O5O4N8k92K9K8j02K46p4p3Q6Q7m16L99n9n9rrk06
528A23J44N1N1l7l6L47kr6r7j07j07K41j07J94j55J28k20m3m2k38L42O7k83K11j37K06j43
526B55K50r9p8K71m13J69j40M41j40j40J35J36l67K15j35j36J48k01J99l82M01j79J93j55
524B48j56J93k24L58j07K41l16K65l02M7q2K67q2q2p3p3L63m51L72K3m2m3K67l15K08j41J
522C64%m4m3K87o1l67K15lkL4L3j37j37O0N9m2L08J47m34N5N5r1r1L06m3m3m3Q1k69K12j38
519B28j0j1l2l2K46K46l72K09m3m3opj2j2N3N3k2l72J37J38o8K81n4n3l10K71n5n6R6R5p9
517D04p9m2m1K4K4K15j34j34K15L6L7j16j15k3k4O5O4k7k7m8m9K35j14m1m2L01k80J62m18
515B8M44j37k1k1opJ90J89l01M8o1o2L9L8p1p1K56r2r3r3K31j19j19K31l7l7P2P3j34j34M
512B27NK06l76M32j50J53j95j4j4j19K30L3L4j4j4PQj67J83j74J75l24K57J49k00J83J83k46
510D58k45QPJ18k32J29J30o6o7k7k6J48k01K51r7j41K08J21k28R9J00j41K08L4l15M8M7J57
508D85j93j16K33J5J5j23j22n7K91L0L1k90N9M9M9K0K1K58n56K22j28K83o6K0K1j10j10R3
506C24R4QPN9k91P3P3J02k46R1R2R9k50K29j19M8l01N3N3J62j86p5K75q9q8N8N8n1n0J80j69
504B23J36J36j99J51k5k4k23J26P6P5j15j15j67J83J70J70j86j87J5J5N2N1k54L28l27K55
502C40q5q5J18J19k56R3L48k34J30k19K32l50L97j85j77J72K6K6p6p6j62J88rrJ05J05o2o3
500C51K41j07j74j73J89J89j52j53J58j90R2R3k0k1m3m2K86o3j28j28J97J96l41PJ90j60J67
497D61j81J3J4M2l06K04K04k17J31j1j2k08J41K12j37ooj10j10R3R3R6R5L0K9k22J26k29J19
495C48j97L85k12L70l55K27j30j30j33K15j77J72L6L6j67j68J3N94n19O4J72j76J44J44p3
493D83p3J24k25k3k3M3M3j26j27M05j78o3o3L51k30J80j68l1l0J15k33K90k92LLN4N4O7O7
491C97k0k0j4j4P2P3l5l5n7n7J12k37K44j06Q1Q2k46J04J80j69K7K7J37k12j5j6J12J11r2
489D14r1L5L6j31j32L14l5k39J11j8j7j7j7J39k10K70q0QPL3j42L22m93K96n2K2K2j08K40
487D87n5n6l4l4k9k8J97J97l47KK10l72K35O1m1k16M6M6n2n2K55K54j82j82O0N9k4j98j41
485F6K08p6R9o0K90j51K5J28m5o1o0j51J98o4o4j21K28J63j86j94J56o3o2L9M0q0R4J36k13
482B19ooJ31J31q3q4J51k3J03k45K75p4j39j40L7L86l88J93j45K9l2l3k2k1N5j20L76K8l65
480A88K16j01P3J1J85k60q7K45P0j70j70J39J39o5o4JJJ30k19j2J62j94J55qrj87J63l4l5
478B63M8M7K29l53M8M7J71j78L08k74p7p8j52M30m3m3jjJ08k41NMj7j7J48J48n6n6j11j12
476A94K30j20j2j2K50r9J4J3qqk2k1k1k1J%q6q7J09J08j75J74N7N8j25j24K4K4o3o3M8M8j27
473A58K23q7K62k54k54K59r0L02m7n3n3J3J2n5n5L3L2J07J07j19j18J76j73k09J39K34l48
471A42k1k1K62q6K19j30K8K9q1q1Q8Q8n7n7l4l3N19n28L08k73q4K65l08K74q2q2M29l85k6
469B82k6K9j46K47j02q4R1L19k62j41K07m7m7P3k77L20k9L5L5p4p4OOJ25k23NJ80Q8k60J43
467C99k06K41j08J13o2J01k47K44j06j16N8O5O6m7m7J24m57K65R2J38k10J8L68m13J70j36
465C07j36J22J23k3k3k4k5N2N1K0j55q5K63k60Q9j0rJ29m5m5L03j36L9j15O0j54J94j88J62
462D81m0m1N8j16R1k58K11j38KKO8O7N0N1j17j17J83j66K63q6k91K90N0k99J13J12l46K36
460C13P2k76K62l20L37j3J40k09Q6Q6l4l4l0k05L73m41O13m34nmj49M33l44K36k03J45k32
458A63J16J51j98J95j54J52j97L27k55j56J92M7M7K2K2o6o5P5P4l61K20J77j72j36K13j9k0
456C94K5K4k67Q2K64q6R0k60O0O0K9L0K9K9j40j39L11k71J30k20J23J22Q8k61N9N8J23k26
454B60J67j82Q1Q1k89K92J57j92J9J9J48k01J70j79K7l22L68K0j80j81L29k53J21J22O3O3
452E28J5l35J45J45j83J67j98j97K87o3M6M7j28j27J34J34m6m6k4k4l4L15k96K86k36k35J20
450A97J21N9O0K19l62k11L70PPm1m1j28j28N2N2k10L72M8l00J35J36m8m8m8m8O6O7J54j95
448C14k22L59J19k29j11j11N65k49L4l14J72J73j95J54M5M5j49j50N5N4n7n7K35l48M23j58
446C97k10J40j0j0J1J2n2n2o7K83l26K56L8L8p5p5K53l29N2N2j80J69L0L1l5l5l2l2J35J35
443E12j78J72j70j71R6R6k45J03J00J00J2J3k90K91j23j23J61J61m65J17Q7m94P99k48K36
441E49l45J56J56k61L21j16j16k39L42N2N2l25K56j07j07J52m30N07p5k09J39ooJ1J0j86J63
439C38l5l6P4P4o9o8J9K0l1l1L18k63p9K71k45J04N6N5l58M55k47J01J52j97k7k8J47k03Q7
437C54Q7m4m5J15k35K89k93K03K04r5r5l4l4N3N2j19j20K73l09K42j07N3N3J18J19k60k60
435A65J07J07J29J29k53R6L1l18n1K98Q1Q0j58j58K49l32N81m67l7l8K97k84K24l57J70J71
433D62j85J63j38K10k9k9k77P2J16J15l51K30Q5Q5R5k54p9p9L13l5j81J68o4o3o3o3K94n4
431D64r8r8m2L07j4l62J03J03j44j44K61q7J60j90o3o4J18M67k55R5k77P3N8N8P3k77J04J04
429D33Q2Q2j25j25j18K32n7n7l4l5J71J70m18J63M0L9j28j28P2P2P2P2k1k2J%j81J67r4M88
427H13l51l50Q6Q5j28K20k7L22j93j94J49J48p2p1l6l5j93L89l17K65l75K07P6k73L38k44
425B39J71j78J34J34j1j1k12J38q1q0K30j19P7P8L8L8k89K93p2p3k32J16J05J05j35j35Q9
423C57Q9K3K3k67Q1k8k8lkQ5Q4k7k8noM20o28K45j03R7R8j1j1m6m6k4k4kL47l08M2l5l5K3
420C47K4k51L32l01M7K26j23QQK7K7P8P8m63L53k15J34K8K7l8l8J08J07l07K75o9p0N5N4l1
418D37l1o8o7L56k26J41k08J00p5j19N6J35k15J67j81R8k51O00m47J47J47K09o06J35m0L99
416E93m14o3K86j79J70J70j79j80J70N0k99J91j58K16M0k8k9k6k6j13j13J71J70r1r1L2L1
414C01J41k09O7O6K04l77K07j41j66J82M5K18o1o1ONn6J19l25K56K8j47Q5q9k05L77k24L59
411F05j00j00k76L05k40J09J66j84J55k0j73J76P9r7o9J06k6k5J22k27K53r7j9k0o3o4K22
409D98j28K00j49j73J76O7k82R4R3k48J01K78l05L50k31Q0k68J75J75j38K12l12K69j47j48
408B39m6L04l5l5l5l5J16k33j24K25j44K05j66J84L9L9k45L38k90N9R5k53P2P3K33l49J09
405C40J09l7l6J30k20J95j53j09K41K2K2j00j00j22j23K65q4J42k08K34j15L8L8P8k72P1P0
403C16k1k2J39k10K49l32R7R7P7k71L97j84NNl2l1O1O0j13K35j43K06k51R7j31j30J53J53
401D76m7m7P7P7O0k89q5K63l1l1j54j55J67J66K1K1j1j2k30L52l03M7k01J48M32j50j20j21
399C20J30J30j32j31jjj10K39N9O0j59j59K88k93L3L4JKK3K3p5K73L4l15K91k92J02J01j06
397C69j06J48J49m76L38l3l2K7K7k99K81q4q5J18J19k57R1M1M0J5J5k47L35J8l30Q4Q4N5k94
395A11J07J06l9m0J58j92J5J6poJ79J79l95m7O6O5J60j89K87k94J1J1O3O4O3O4j33j32L25
393E76k4k05k04K31j18O2O3j56J93M5M5j01j00J50j98Q5Q5m7m6q3q2M02j79l3l4j55J95J07
390D74k42O7O7J91j58j75M07j67j67j73M09k24J25J91j59j37K13k5k4j98J50j41j41K23j26
388B60J30J30r6r5J22J23j39j39M4M5k40J10K5K5K43j06l7l7n9n8k0k1J26J25k2k2j09j09
386A99J61J61m2m2o5o4Q1Q2k02k01L73K4ono3o3K51l30J9J9l6L14j23j23n8K92j09j09NMK95
384F39n20K45j04l1L18l68K14r1r1Q0Q1j4j4l94M17klk12L71o6o5J43k05j0rk6k6J70j78j1
382B38j2J12J13o6o6P9Q0q6q6KJO1O1O1O2o1o1K7K7o8o8J9l29K59r0k4k4L11l7L5L5j24K24
379F05m45J38P1P2j76J74m5m5K61q8o9o9k21L60l81M32j70j71j14K35p0K78j38j38k8k9L4
377B63L5K52r6j58J90k02J48k46J04o4K85l3l3r8r8R5R6QRl6l5P4P3k60Q9K12j37j80M02k10
375D49k09J28J29J94l88l9l9J87j62J51j97L92j90o3o3J48k01K75l06L62J4j65J85l39J0J99
373D62j50M03m11K21l60J99J99l40RK34j14K52l29l9L11l08K74J9l29J7J8L22k58l2l2M7L97
371F82o30J85K17j32M1K16O7k82J82j68o5K83l11K70k53R6J38k11j5j5K12j38j27K23j05P0
369D30N5j20K65l17J96j53O8O9m1m0j27j26N13l01J30k19qL40j16j16r5r4J44J43j2j3M9j26
367C78p8K70q2q2O0j15j47K02j91J59j14O0j6j6M6M6m23L90j4j88M29l85j03P2J85j65K96
365D74n4k4k4J25J26j84j83q9Q5M35l80R7p8O8j06J51J51K06l75j04j03J58J58k91K91j56
363C74J8J03k46q0K70k62q9M46j35k15J34j97J52M7K21k33J15j24K26j17j17K14j35M0M0Q8
361E38k60K63l18N4N4K15j35J00J00P2k78l6l6K9L0j27j27N5M04j98j98p4K75k26L56k77L05
359E60j37j37K63q6k3L26j76j76r0M91l52lk2k2j97J53P8P7J3J2j67j67J30J31R8k51N4N4
356D34o2K86j71j72O9O8k15J34j44j43J04J04L00k82K42j07L2L2RJ0j28j28K86k95J36J37
354E36k78P1K06l76K57r3m3m3J03J02k14J35K6K6n9n9N0N0j49J99q5q4O5O4J16k33K6K7l2
352C11l1L43k39j15j16J02J01m5m4J44J45l36J4K35j14J8J7J12J12k08J41k27J21n3n4O6O5
350D65q0q0J8J9M0M0j77J72k71P7j33M49l15L4P7P7k06L75j46K02l35K46l84J98noK0K0o7
348C24o8J04J04J6J7j11j10R3R3r5r4J67J68j16j16ppK32l48Q7Q8k58R1O2O2k43J06K30j19
346C52J08k42J96j54K18j31M4M4m3m4M4M4kkk20J29J92j56k44J05K80o9p7p6K87o2j27j28
344B66j6j6R3R3j47K02k99M9K41j09K2K2n4n4K29j20J4J4j32j32K51l30N43k72J1J2m0l9J80
341D82J80j39j40J41J40l32K50j47j47jkR9M49l81l81L28k0L0L0j21j22J41J40l2l2l2l2o0
339B89o1J87j62K10l71J60J60k40J10J17J17l3l2j19j19J36J37j25j25R3R3N7N7m40L74j93
337B77J55m2m2J61m20P7P7J9J9K83o7k12J37N1N2k11J39j31j31J53J53r8r8L23k5k33J16j16
335C66K32N3k97RRo2o2K66l17K20K20j59j58J14k34K81o7Q6k63K03l79M99q3k50R9Q1Q1J6
333E04J6L8L7j07j08q7q8K55r5P3P3J74m07M2M2N6N7J86l97Q4Q4R5k54K26j23k3k3J30J30
331E90j71j70K80o8J28m54J64J64q9K61q9q8j00K50k74L08k09k09KLJ69J69j21j21j2j1l4
329B68l3K14j35K79o9j58J91k23k23K15j34J27J28M2l07M28j54k58L24m0m0p1p1r3K56NNo0
327D13o1P8P8j84J65k20J28J51J50l65j7J15J14l00K82m6m6m3m4m4m4J26J25k46J04p8p8L1
324B44L2J04J04J6J7o6o6j10K40J25k25L1L0k35L46j56j55J42J43k07J43k13J36J57j91o6
322C20o6J08J09k10J40L36m78Q3M33m19o9m4m5J52J52q6q6J98j52J1J0j1j2P1P0R2k56rqJ67
320E01j83O3O2M1l08J68j81L86j96K46j03K10l72ppJ53J52k94N5L3L3PPQPl0l1l1l1J11J10
318E79j74J76j68j68J45J44r7r7P7P7n2n2P2P1l23K58m8m7k09J40R6R6k4l74M63j19j52J97
316D87j23j22l4l4L81k01N8N7j32j32J2L60l59K22J67j81j23j23J38J37n8K90j57j57M0L9
314D52j49j50J63J63k66Q3M0L9Q1k69K18K19j51j50J3J3Q7q8j10K39P3j03q0R4n5n6n8K90
312E82O3k86k28L54k14J36R9R9l41K41l05N10m72J10N9N9j61J88j43L2K03l79J05J04J4J4
310D43K5K5j17N7K54r5k75j00l9L10j72j73K17K16j10k85L29k0m7m7Q8Q7j85j0j38K11j94
308B55J55K83n32J19n5L22k6%j75j02K47J5j61k21L59k1k1l33M80k62Q6j58J92p1J04K7K7
305E33j07j08n6n7K72l10K13j35J3J4J99K4j37K11l1l2J48m34J26m8n2k27O39j76n2n2J11
303D89J12j96k0K73l08J41k08K36j14K1K1j61J88k42L39j12j12n2n2%jM02j79k88O1rL40j6
301E53j6k25J24K54l27j1j1J8J8J69j80p1K77j04K44j71j70J77m05N84k30OOk41J08j8j8j26
299B14K22N3k96L00m9J34k14m0m0J06J05J9J8j73j72L80L1l62K20onj88L94m2m2q6m36N76
297F21m72L77k05N7N7l7l7j25K25j77J72j12j12K99n1k1k1J97j53j01j01J17J18o5o4r9K50
295E37j65J85L3l15J27J28k52R7j50J98N2N2p2p2k1k1J24J25j54j53k9L19o4o4o5o4J52j98
293B70O5O4J66j83r5r6K24j25P1P1k7k7j14K35j68J81M3M3l64K17Q7k62J24J25K05l77Q1k67
291A67K12K12m3m2o4o4J65j84K52l29Q4Q4K6K6R1k58O2O3J80j68j69J81j09j08K19j31o7K81
289E69m09J72K3K4q6q6J46J46k32J16k03J46j16K33j41K08n4n4o9o9J13J14k06L76p4p5k75
286B37P5n7K93n3n3M2l07L83j98K89k93k9l0n8K90m6m5p5K74j01j00R6k53J63j85P6P6Q1Q1
284E73q7q6J85j65O1k88K13j36K35j15O0O0j36K13j52J97k04k03K46j03K0L70m74J08POP2
282D77P2J01m81Q8M37n60K3K33K33j81M00l57qj82J66K57r1k52L30m43J39J09k39K51r8K95
280G19n19L42k39l6L13N8k90J02k47K50r9K72p8o2o3KLQQK12l70n4K95m10J72J20J20N5k95
278B89J3L62k56R3L4L5k71L11j22j21KKk7k6J69j79l8l7L04m5k01J48p0p0Q1Q0J32k18j55
276B19j55K45j04L98j84j41K09j23K27l85J97k79L03j19K30J03k45N9O0j47j48L5L4K55r5
274D49J5J5p1p1o3K86j37j37L8L8J92j56L9M0J8J8j13K36m79N69j51j52j11K37m6m6l5l5j23
272B64K27j63J87k94K89j46K03K39j10j92j91J06k42M84l30m6m6r5K53N8N7P6P5o2o3k98K85
270E25j96L86j87j87L74m42K48j02j53J97l1l1L19k64K6K6j1j0l3l2n4K94j66j67K9K9M4M4
267D75j30j31J50J50j41j41J42J43l2l3M8M7j48j49K76p2n1n1L4L3L4L3j41j41J71J72k02
265C45J47j3j3l65K16Q5Q5j38K10%l50L49k33P2P3j6j6J44k05L19k63M3M2k6k6k6k7Q9Q8J32
263G22k17j89J61N1k98K25K26j81j82j07K42nnl35K45J15J15j85J64r0K59m74L40r6r6o1o1
261B83L10m0q3q3P0P0k1k1k1k2O1O1l32J7K42j06LKK19j30Q8k61J2J2J1J2j41K08j0j0K87
259F87o3j78j78L01m8k5k6m4m4m4m4J92J93k95N4Q8Q8n22K91k6k6J11k37K61q8J08k41P2P2
256C89l7L11k46J02n1n0k16J33J12J11o0o0o0o0J22J22n3n3K0K0K16j32k8k7j07K42Q0n01
254B39J38J39j9k0l47K35M6M6j91J59r8P7P6r8K11j39Q3Q3l86J96q4R0jjL70m45L4j41L06
252E58m3l0l1p4p4J98j50L5L4J16n8J71m11M88l25L98m17J69pr3r3n4J21k8L22j57j56m7m7
250C15L9L8O0O0j59J90R1k57Q6q8J48k01K74l07N50m96L23k58J89j60K24M9l43OM0j34K26
248E05K26l76K06j50J98j28K20r9j00j08j09J52J53j09j09J57j8k08J42l0J45J11o4P4k75
246D06J64j85O5j09K20j29k16J33L2K07k74L09r2Q3m4l93K68K67j54j54J53j96%JJ27J27m04
244B12J78R3R2j32K16k86O4R2R3onL8n44L95M6O0O1o6o5k61Q7K64K64m85R7m09M06J66m16
242B49Q3Q3K43j06m8m8j78J70L7L7j59J90nl53K64K64l31J8K00j49N8k91J67J67k23J26J11
240E76J11l32K49p7p8K3K4K4K3j01j02M3M4K0K1jkK10j40n2n2J82j68L0K9k4k3r6K52K7l23
237C17P8P7J81j68j68J81j7j7N5k93K97K97m08J74l62j3L43ok9l0J16J16k50R9j20j19K01
235E32j49K44j04r4r4j08K40j7j8J13J14k11J38q1q0K18j31j31K18j24j25M3M3N6N5q9r0J00
233D68J01m5m5L8L9R0k60L4L4l8l9k00L81r1r2Q5Q5k20L61k97N3J54J54j32j32K9l21L79k03
231C70J39J39k75L07JJj24K25l72k2L0L0k75L07J2J2K30l52P5P6j58J91j4j4QQn2n2n2n2K7
228C74K8J74j76M21l92J89j61L17m99K22j27J49J49n5n5j67J82j60j60J76J77j22j21L00k81
227C82M6M5k8k8QQj59M22j30j30j95L86q7q6o7o6P9P9ONOOJ33J33l40K43l5l5k0k0O9k80r8
224B52K50J92j58nnj62J88j83J65j94J55J40k09L02k80M7M7k61Q8N9N9j69J81R3R3k05J43
222F23k56L25k16L65j88j87R0R0j14j14J10J10l5l6llj99J50j2j2J0J0j8j9J8J8k71L11j6
220E31j7J1J0K14l67K59l22J14J14k8k8Q1Q0k91N7M3M2J56j94k0j9J39k10J31J32j29j30J6
218C75J7P0P1Q5M34p70K76j60M22l22K7k42J07K3K2M4M4QPj66J82o1K88k28k27K08j41N6N6
215E05K8K8k2k3l71K10O5O4J63j86O1O0l77M37O7O6j43j42n6n5J30J30j54j53L12l7j39j39
213C29l9L10NNk21L61k93K88j13j14n5n5j08K40K41j08l4l3k96K86k5k5M8M7k77L04k05k05
211B58M31j50k6k7L4L3N6N5j75J74k55N59l98n0RQlmr0K58k05J44l0l1m1m2J55J55n21K93
209E74J62m20K15K14o1m11N8N9K32j16J8J8O1O2m1l89N49l3l22K59j40j40M29j53j24j24K37
207F73l45L81L3j23j23l06N10m16J67J15J16k47J03j45K05KKl39K42L35k47j45K04o1K87m91
205C87L24k9k9j82j82J75J74j09K40j52j53J89J89k11k11M15j68M7l02L31k51O8O9p7p7j55
203C20M26l15K67l1l0j90J58R2R1j49j48J10J10r4r4K7K6NMJ58j92j7j7K25j25P2P2o0o0j84
201D57j84L71k11PL56m2m3m9l99K81o7K66l15K30j19j26j27L54Mo1o1q9r0M63j18k10J40L0
198F48L0K8l22K74p4onL8L8N1k99L13k69J20J19k5k6R7k53O7O7k27L54K7l22L08n06L81k01
196D25n2N30m09n9J63J62Q3k66j69J81N0N0r2r3j07K43J93j56j05j05K40j08K6K00m03J79
194F01J82j67K02j47j47K02j89J60n8m07L61k19L14k67J37l8kj76P7M26k86O3k6J48r5r6k73
192B80L09J67j82J23n1K5K5n3n4K67q2j4l62N6K30k13J37j95J54k91N24l7l6k52R6j43K05
190F33L35m80J97j53J47J47k17J32r2r2K58l24N6N7K0K1J04J04l69K13j34j33K80o8j54M28
188I16k92j17R1q3K32j16nJ69k05l1J76Kj43L1P8r6L36m78N2K27M8n34J80N28m10J72j53j53
186D22J81J82l01K82Nl44J10J10k62L21R3k55J22J23n4n4j63j63M03N3p0p0K6K5M8M8k56R3
184F55K1K0J49k01J05k44Q3Q4K50l31L12n01O5O6J27J28j35j34MNj0L39m42J39J17J18k73
182E16P6K6K5J8J8L31m84J48J48j64j65P9P9qrm2m2J40J40O4k86k4L26j75j76q7K61L9M0k01
179F11J49j08K41k97N2J36k13K08l73M05j76M9M9j73J76j07j07K69K69l41l42J78J79mlk07
178E20J42K95n20M69J20j56J93m68J14j04j04J41J41q4q5J65j83L4L4j42K07j85J63O3O2r0
176G42r0N9N9j7J57l31J9J02J02ll53QQL29J55l14K67m98L17J57j93K15j34j78J71J34k16
173F74KKL6L6j1J63k71N44n26K89j59J7r7r7j38K11K21M7k22J27k01J49k2j97M47l68J62j87
171F31L50k30J07k42K13L8k48J02j27K21j5j4k6L23mj79r5r5K46l35J67J66j56j56K26j23
169G45L0K04k11l6J94j55O4k86K48P4l47JK27N1j77J72j95J53k1k1RRQRj3j3klr3Q2J69j80
167F96K23M9m9n0K5K5j93J55N8k92j8J55R8k52K62l21K31j19M1M2M2M3m5m4N3N4O4k84K43
165H92O8l79M35k13J35k06J43o5o5J75j74j23K26J53j96L63m51Q3r1N7N8M7M7l0k9k9k9j6
163G86j7Q2Q2l3J43l16L3J07K82m08o0K14L9P6k73OJ81j35K14q3q2k03L79k54p9P4K48j34
160H69K15n48M99j92j7J10k39L37k45k7J48j34M1l6J39j32K18N4k96PPJ0J84j96L85j78n27
158D56M84r9o5J09MLr4K54p4p5m2m1p6R8J61j89K73l08R5q0J26J26K71n43J01p4J84J84l42
156H27K39j09j10J36k13L4L4k19N96j83j83R4R4j83L99n92K22K74l09L9L8m8m9M39l75j35
154G57K13K12j37k8k8K11j38j02K47m61J20o2K87o2o3J19k29K44l37N36k79j24K26J24k25
152A021l12K70J82j67L0l20L13l6L9L9L8L9k43J07llL0L0opJ39m42L57k24M4M5QQJ12J12k08
150I92k07J2J2L32j7k7l76R7R7K56r2J7J6o7o8q2K67o0m09N50l1l34K47o5o6J81m02J07J08
148I88J78j70j1j0L62k20M3M2j72J77l53M60l93J88q8q9P1P0M8M8L1l19Q1Q1l9l9J06J07l2
145A146l1J32m3J1l37K36j12J17n8J06k43K97n1j02j03K38j11J21J21k49L32j77j77L21k60
144A124j08K41j45K04r4r4J46m36L13l6q3K65j49K00nnNj68Q5k63r3K57K16j32k4k3Q2k67
141A013L77K8m9k23K42j07pj82L09k72L1L0J15o0j7L33l33J6m2m2J76j73J06J06j37L7k27
139A048J23J12o3N7j17J15J15NNpol2k07j02K48l6l6N5K30j94J55j39L5J13o1k8J46k06J44
137A472j19N7k41J09K29j20K43l38J42k07K18j31M4M4j4j3J31J32j17j17K8K8k6k6m0L08l88
135A288J94k4k4j6j6l7l8K88o1k06J42j46j47J95J95m8m9j36K14r8K51k08J42j59j60Q7Q7
133A510o3K85K3l25Q2Q1Q9k60j15M66J10k39j27j26J35J35j15K34K41l40k13J36j0j0K5K5
131A634k15L67p7p7j49J99o5o5K41j09l2l2L3L3n0n0R6R5p5p5P0P0O7O8l11L9j16K33j02K48
129A893m04J78P7P6j7j6k13J36L6L5P9P8k71P7K58r0k53L29j80J69k28L54r6r7O6O6k62L20
127B100k8k9PQJ0J1j9l68K03j46M65l50K30j18J50J50m24J58j04K45onk02J47J20k29J85j63
124A998L6L6qpK25j24k33L49k32J17m3m3M4M5m3L06l45MK30j19Q2Q2N4k96M8M7K6K7%Jk2k1
122B221K57r2L38m78K19j30L8L7j76J73k3k4QQPQm9m9J32J33l39K44O1O2j74j73J24J24K30
120B717j19j0j1P3P2OPj22K26j66J83M4M3l06l06O06k08K43j06J4J4J3J4r4K56J32k18o7K81
118C211q2q3p1p1K56l26J94J94NNk1L29j95j95K48l34J89J90j93J57o1o1K70p9p8p9J09k41
115C187K83K84l17K66j71J78k6k5j13j12M53J05m11M03l33K48j00K48M42l72l1l0k00L82J28
114D366k22L69k13L10l9l22K6J36J36k17L64J46k03j3j4K70p9K7L76j11j11N8M08k98N0L52
112E552LK4K5K35j13J04J05n2K97K47j03O35j79Q3M32r1K59L75L74K70K69K70O18K24N72P33
110A1168L83J162N79J002J350J247J596K061K062K461K461K301J720J506K27q34j416j700
108B9336k281k340j990k069j720j218j218j094n13p02p02j57p38k37k37k92k91J01m81K20
107A1377j28M02m13J15J15k42L40L8L86K05K05M55J07M99M99L89P39N63N64O69J019R96R96
105A9895J282J282J806J805K171K171L021K440K984K983L180K831K610J797J898J084J530
104E6770R48J698J697K715J901J894J48j811l556l592l941l782l781k625j579j393j14N70
102D2167N70O05O04K77p2k59k59k37n86m65j511j257j839k214k214j901k483k007j658j112
101B4149j113p47l98m20m20KKKL51J89N39L28R10R61R60J092J440J755J755K358K940L137
99C9772L718M067M649M736M388L675K628J195q4j815l094l627l976m543m194l976l395k921
98C7203k922k099j751j539j540q52q53p39n66n88qk07J42j45K04L38N13O47O47Q73J047J407
96B9212J756J832K182K294L108L567L566M389M737M439N253M689N735N626O208O688O688O753
95A08722N707L828J386j174m082o253p765q140q314p556o276n378m331l960k913k178k179
93D9144j126n45l04K77J004J353J339J687R72p6j400k446k806l155l286l112k606k432j879
92C0603j879j337j338q14q14p52p52j34p16k64k65l16K66m16o7Q6Q6O4M13K0L70N29N29O13
90B3715M38J111N29J068J416J087J262J476J825K349J767K640K640K749K749K967K618K819
89E7225L167L080L894L847M894N781O363O443P490O937P752Q232R046R432R431Q501N360J557
87A68432l212q121j0796j3647j4461j4250j2970j1560r815p811o532n440m394l674l325k652
86C5772k304k037j864j198j547j318r69r08r07n83p58o96j15j18j18q2q1J65J66L62J3M30
84B1305M31O60M86R30N81R88J337J246J421K100K101K613K613L373L198K799L148K129J955
83E5414Q81L00n19j566k394k976k853k853l087k505k186k011j404j578m99o73l58l59M88J40
81B9402N39Q88J398J746K052K866K618K968K641K292K357J077O12O12j76l51q57j671k260
80D8753k608k755k928k446k794k340j758j707o60o53o53j69j70j87j3p9m27o46m71k31n81
78B4477J6j58j04K45N16N16R24R23J287R38J731J149J459J111J292R44J436J436J741K091
77D3970K230K230K165K165K218K218K181K763L563L563K857J345r59l171l948m762m783m784
75E1061l794l794l009k195j874j293j061j060p55p55l40o90k60Q8k35J14L32j7l5L14K70K71
74C1283Q06Q07Q43Q42Q11J391J356J355J784J783J863K445K503K503L310L659M652M303N691
72G3990N691O368P415Q047Q861J0126J1870J3630J6539K0472K5474L1903L9464M9049N8239
71C87138O0116N8138N6480K9374O469m349l7258n1567n3254n9652n6868m8143m0246l2917
70B13461k5227j8830j4394j1020q475o730n916m637l994l413k977k394l253k904l624l624
69I2049l518m100m252n067n329m515n139m326m021l207l352k538j716k298j746j163j151j500
68C3111p55j337p80o05q28o53o26m52l29l28n36M6j83qk42J08k34N81kJ74K82M57P71J90N17
66B8339Q65Q55J030J164J513J547J548J754J755J726J900J605J955J873J873K040K389K727
64E8458L542K683K335J397j16j497k545l511k697l206k159k036p56p42N38O91J505J792K141
63E5817K612K437K427L008K372K721L638M219N096O143P015Q063R531J1044J2672J4650J6695
62A70160J8208K0141J9793J8949J6506J1765O065j030p429j3203j8204k1339k1688k1294j9318
60A58082j7603j4927j2964j0754r161p417o660n846m752m403l875l295k963k789k396k047
59D6230j751j576j151j151m73q22n24N8j46K04M39O14P15P14J470J296J648K231K168K983
58E3176K793L841L477L303L543L368L391L041L874L874N466O513Q041R319J0251J0832J0622
56A48725R109P756O012L752J076k123n264p724q538q090q440q340q514q947r296r512r163
55H2479q655q072o986o404m983m809l797l216k980k630k377k027j769j594j620j039j151j151
54A7219q20q21r45l63o57o58m35k61m56j06q38k3l81l81j55n05L8l10k60k60k57R1n64k14
52G678k40k39J82j67l04l03m2l90ppk46J02m5l94k63Q6K5n58K86k96n6K94l76k7l20K9n8n8
50D286J8J8k43J05l00M9j25M9p1J04j51j51l03K78j47j47J16n8ll53L31k51L3L3m9l98L18
48B988k63J34m0J19k29J8j56K8K9j83J65O7k82K9j46J38k11j28M6L30k52l6k10K15j33j80
46A857J70O1O1k47J03r7K51J7j58l43K38j79J69r6k70P3P3O2O2l9m0j85J64l71M44k36o2O6
44A548O6l02M8j15K35k56L25j63J1n0n1L4L3k8J46l51K30k79L02q8k63J34J34%JJl48M73l42
41A085j5J60j44l19M42l73J96K2j06O9q8Q7j12M68k33n9O8n14O26j88q6q6j0j0J1J2j30K19
39I92q6Q8m3k18K6L75l11j35p1J04L02m7j81j81L09m0J2J1MNq3q3%JL7L7k59L24m62L52o0
37G19o1KKr7P8L43ol40RJ11k39K29j20J41l3Kj73K19j29j56J94K37l45r4K55m3m3q2K67R2
35I39q2j95k0J6J6K1K1J08J08k10k11N2N2QQK15j34j90j6K54r6o0k34L25k56M9K24j55K0Q5
32F62Q5l99J82J03k46J72j77J84J0O4O4M3l06L26k3P3k76K91k91K10j40j6j6K15l66J28J28
30F84j71J77J12k37m6L04j07j07K0J94l18K64j47j47K68q2j03M79l87l8J84J85k81k81N06
28I25l08J79j70K00j50l02K79J6J6j44K05J6J6k89K93q4q4J49k00O2O3R8k50N87k27m01J80
26F75K02j48K17j33j08K42j58j58L29k53n6K93K9l20n8K91J11k38J98j51j25K24K7K8j24K25
24A061k12k11M20j63K0K0q3q2J43J44j37K12k46J04k43J07J58J58j51J97ol54J39J39L0L0
22A194n5n6L2L2QRL1L0j69J79k13J36Q3Q4m0m0o4o3K3K4P6P6R1k58p9K71L0L1Q6k64j54M28
20A499J69j80N3N3j45j45J75J75j58j57J55J55l53M63o2o1j83J66NOj14M67l76k8k0k0M17
18A956j66L4L3k5k5L1l18M75J26k61Q8J32J32p6p5J06J06O0k88P4P5j47K03q2K68l71k2M51
16B494j31l6l6J09J09J78j71L2L82k48k47J52J52n0n0K33j15P0P0j19j20L60J1K5l23L21L22
14C374l11L8r1K58J20J21k86K97rrj44K05K05j44O9O8O9O9k67Q1J47J48qpr5M87J3l36K39
11D301j11J88J87K1K0J5J6J53J53m44L69L5L6K61q7Q7Q7J76j73K20j30K02K01J79J80r0r0
9E962J25J25J22K96l84Q96n31K84n1K98j93L90J20J20r1M91j27M55k82L00M59j22K64q6K49
7I089M23N7K31K20M6M06N7M60J11q6K62L43L42Q6O68p7R7M61M60J4L63K82K83L80K07N60K11
5A5956N93K44M91M91M69M70N23N23N12N12N81M07N05J319M36P85P26P27R63R63J156J504J218
4C2074J393J650K000K301J952K603K778L232L813L803M617N206N788O733P547Q825J0105J1762
2A18182J2577J5241J7452K1015K5551L1856L9418M8637O1318P4148P8685Q2539Q6145O6904
1G79668N6550N5808L4286K2271M239j3881n2854p5185q1816r4482q9712p9959o9139n8610
0C37184m5930l6876k8848k3716k0109j7164j4721j3194j1681j0573r526p905p904o974o159
-1G5904n527m945m422l608k742k743k422j841j997j648j488j663j143j143j288r39r50j125
-2C4270r92r92j113p63q60q59o42r90p92p93o90o91q07k25m54o29m83m84l64p13l83l5q42
-4A8674k60l49l48k79m54l88m0n84m10k42J07n51n51J16m65l24K6m53k78M5M5n43j95j29j29
-6A2041j53j52j64j63k7k02J7l32k14m0k46k47j01j01j4j4j66j66r8P7l37J2L3l15j48K7m10
-8H397J72k58q5m7k23lmj78mj33K17k89O0l58rM1M2l36J3j15O0j96J53j7l67K69l12poo5o5
-11F347k60Q8l2l2k13k14J55J56J26k23l11K70k76P4j81j82K99n1j65j65j21K28q9q9l1l0
-13E078K58n56K44K44k32J17n8n7l07M3rqk0k1J47J48k61Q9l25K56k94N6L61k21l47M66j52
-15D639j51j31K17j60j60j9L31j50K00j49j50J8J8O1O2o2o2j41K09J00J00j73j72k02J47L85
-17D605j96n1n1l1l1J72J73p2p2J25k24J06J06K0J9j72J77k0j9m1m2n5K93k84K99M4M3l39
-19D482M74j28j29J17J17k9k8N5N5R2R2l36K47o6K83j79M03l83K00l0L19j90J60k54R6M23
-21E863j59O0O0J10J11Q4Q3Q4Q3K9K9PL57N4N4N35k80J38J39N2N1N51l0qN73l6L13K62K63
-23I432P5M24K28N77M61Q10J85N34M62J043R34R34J032J381J498J497J868K218K137K952L236
-25C3918M051N112N927P105R082R686J0965J0755J0755J0020R671P810L738q42l286n273p483
-26A21711j0231j1511j0413r832q959p214o654m909l803l222k408j826j535j187p08l59J72
-27C7112J71N65J611J095K142K900L250M645N692O986Q267R087R670Q780Q781Q155Q155O760
-28A33824M549Mj973l877n389p599q646r919r570r293q014p142o560n150m336l913k634k525
-30D1837j944j610j611j051j051n63n64n78MM3L92M43M43R30J512J257K304K205K553K917
-31D7868L499L854M902N484O763Q379J1055J4050K0216K5910K8352L1842L5682R013o692K804
-33B52981N93p412j4043j8377j9656j9101j8752j7588j5843j3182j0739q427o682n351m071
-34G4350l417k603j687j104n67J5O84J266K182K996L825N338O806R948J2694J8627K5142K7353
-35A81848L0399L4471Q004j0959j329j679q266j0476j0695j3137j5043j6555j6344j5995j4541
-36A19703j3261j0870r589p801o521n573m527m482l669l297k949k243k244j656k005j598j249
-38C6169p91p91p69m20n24j74L27L28J31P13R09R09J622J621K145K495L132M412N342O157
-39F2943P513Q328P963P615P093O046N901L224l56l264m130m130n439o485p504p503p262n982
-40F4571n554m738l947l364k049k048j127p78k98k98K55Q36J701K284K875L923M584N631O242
-42F8701O242N878N297N086N086M468L420L53k556l283m098m146m496n012n593o372o371n732
-43E6872n731n008m427l583l583k940j892j820j820j546j197j590j241q30q30o12o12q62n12
-45A6236o95j13r62j47m46m45J00p14j91j91k3l72n11j62K68n47K17n98p3p2k98k98j09j10
-47I744j09j09j42j42N4k95j23j22j82j81K30l52k5k4k34k33J16k33K20j30k89N9l09K72q4
-48G377q4l64K17k18J30j05j05q3q4l9m0r0r1k89K93j72j72l27K55p3p2j33j32O4k86J82J82
-51E741j53j52O0k88L22k59K8K8J3l36N4N3k52R7l9m0J79j70n2n1k70P9j5j5M3M3l20K62m3
-53D547m3k42J08j98J51L8L8l12L8M3M3p3p4l13K68J37k11r4r3N9N9N3N2j3j3k75P4N3N2n7
-55C802n8L0l19J49k01O8M17k76k76k1L28j82J68k03J46r8r7p6p5K6K6K7K6l6l5l6l5j27j26
-57B936J86J86k16J32j00j00K73l09Q3Q4O7k81O7O8M0l08K58r0o3o3N3N4J79m03P7P7N7k93
-59B651J65j84L02m7o2m11pL42k9k9j19K29j85J64O1k88Q2Q3J55j94j93J55j39j40K10K09
-61B781m94Q8N1N1L4L3K73l09J4J3kjj72J77j9j9J8J7Ll47M61j21p0p0l57K25K68q1l9m0k79
-64B087P0L06m3j15j16J06J06r1r0O9k79K07K08k29k29j12M69l34K48m4m3j32j32J59J59l7
-66B168l8l7l7P1P1j03j04m0l9K94n19N11p1N3N3k51R9k00L82n16K98N1k98K29j20N4N5lk
-68B011j98J50o2o2M6M7r5r5K76p3J4J4Q0k70J79j71MMP0O9j04j05M6M6k74P5L75k06j70j71
-70A450L27k3J96j53k3k2J74j76j64J85KLl35K46J38k12o3K86l39RL26k55R3k56L62J4k92
-72A498K89j23K26l48K33N3N3ol54k7k7K34j14m5m5J51j97j29K21j29K21K10j40k92N7Q4Q4
-74A638o8o9P9P8r6K52l58rJ08J07k3k4k3k4m9m9m9m9R2R1j05K44m4m5j11j10R7R7R7k52K27
-77A650j21n6n5K50r8r9r8L52Ll02K80j04j03K0K0j73j72J18J18L7L8J38m43L14l6K48l34
-79A392O4O4K7K8J07J08K0K0JKJJL26L27K17K18L54MM1l07k34J16k12k11K7l23k86O3k82K99
-81A972l47Jk4k4k3k4J42k08j1j1K7K7K6K7k4k4j34j33K90n9K8n54K79K79l32J7J90J90m71
-83A092J10L39k43J21J21l8l7j6j6j69J81J15k34j77J72j34j34J65J65P7k72J80j70j04K45
-85A339kkk71L10l36K45m5m5P3P2n0n1j64J85k08J42Q9Q8r3r3J0Rj00r9J35k15M19l96L66
-87A312J7l32J8j16K34L7L7J02k47J82j67j56M26r0r1Q9k61L00n0j70J80k79L03p6p7M7M7
-89A219j02j02l7l7K84o5j09j09L25k56P1P1K9K8j97j97L54NlkK8K9r4r5K52l29kkJ55J55
-92A267j28j28J06k43J20J21J82m00K11j37J02J02k40J09k15J34K50n65L96M6l02l03K29K29
-94I43K87n28K29j20L30k51J89j60k2k2K18j31r4K54l01K81k21J28p0p0R7R7m7m7J50k00M8
-96I67M7j70J78j63j64J78J78p3p3j60J89j93J55j9j9J47J46k17J32Kl46L66k16L10k73K15
-98A124j33L2L2p6p7m8m7J27J27o8o7j87J62J20n4J23m58L9L88j94J55k77P1k7k01K63q6o1
-100G02K88l55K26p9K70k02J47K4K3m02M13J50j98l4l4p7p8J15k33K06L80n69K44Q9Q8j59
-102I45j59J76j73K40l41J17J17K03j47K5j51J60m22L59J0O7k82Q8Q9o8K80l95J86j63J87
-104I48j34K15l25K57p1p0J00k49J08k41M72j10R1k59J47k8J36k14K15j34J9J8J55j94k15
-106F37J33K89o0l66K17Q5k63K63Q9l08M0J06o9n0n1J14J13j38j37J6J5J97j51Q0Q1k12L70
-108A040l07K76Ol43K82o6j24K25K9l20M5M5o4o4J09J09o5o6k3k4L47kk12k13K09K09m45J36
-110G29j7j6J47J47k8k7j22j23L1L0j3l63M58J10k36J13R2k58K2K2J30m51L48kNNj88J61L0
-112G36L0J66j83J4J3j%j%L9M0L9L9j45j45j59M22k64Q6J88j62J80j69NNooO0O0M5l04O7O7
-114G56j28j28J42J41L0l20K48j01ppj45M37l31K52m0l88L85L7k90K91o6o6rqj61J88k26J23
-117F09K71p8l4l4j23j23N1N2l5l4M02j80j83J65N3j21m0L08j82J67j54j55N2K27k00J48j47
-119F82K03j30j30J97j51L24k58M8M7j17j18j58J92LJ77j13j13J34m0J67j83Q9Q9P0k79n6
-121E76J17J07k42K18K18m76L38j13k87M62j20j73KK93k89n1J23k29J20K81o9j63J1R9p6O9
-123G46P0k68L13m06J76l8L12k95N3o1J14k25L57L7l12J28m7j9L30j80l53K00j48L42k39J51
-125G38j98j68J80J08k42L84m30N75k38J13k35p6R7%jj27K23K22j27j70j70L02k79M20j62
-127G39K7l21L42k40j31K18j0j0n4n3q7K63j89j3J07o7J04p0L75k07O2j13N4N3r1r2pJ68n41
-129B16N06J50k00N1j23J70j80L1K06l59K24j33K16j64J0R1R0p4J00l25K56q5q5j26M9k4L25
-131H13n16L00L59m56K50r8K1K1k2k2J03k45K34j15J9J8llm6m7K37j12L6L7m8J28l09K73q0
-133G27q0K88k95l16M99k92N6N7N7j2j1k6L23l95J86k28n3P4j00K27j22N23n24L3j43K78p2
-135F59O6j08K3K3J2J2l7l8J23k27L63k19j10O4L0j45J14o1J62m19M86r5p7p7Q3Q3k63Q7n9
-137D55n9M38j43Q9k59J36J37o0o0m1m1M6M6j34j33K15j34J86j62L39k42j17j17L48k33N7
-139E57N7m4m5oL43j23j22r2K58j13j13R2R2q2q2L3L4Q4Q5J77m05J19J19l57qO5O5Q1k68p2
-142C29K78j71J79j05K44j45j45J60j89J10J10q7q6O6O6m2m3K26j23k18L64l41K41l12K69
-143F35M9k99Q5Q6K43j05MMo1o0K7K7oonon4n5n4n4O0O0Q2Q2k12J37rqJ71m10K88o1l0k9J45
-146F61k04J74J75l71K10J44k05qrK28l54m8L00j48j49l2L17k1k1j74J75q2K68m09J73r2r3
-148D05J41J40j54J95j54j55q7K63m4m3K45j03K23l58J43k05J07J07R2k58K59r0l46K35j14
-150D44K36k57R2R1R2r9r9J12J12k40L41m22J60K05j44J11k39J28J27j0l60L22k7j43j43M4
-152D34M4J53j96R3R3P1P1j34j34K15j33K95n4l67j8M4M3j09K39k58R0O9O9M9l01L04m6k36
-154C90L45r1r2L8L8k89K93j06j06J05J06q4q4R1R1m3m4o6o5K74p5n3n3L2L2l16L2J4L63r5
-157E82r5J60j90K03j45%%K40l42NL55q2q2r6r5M9N0q3q4O3O2K0K1K0K1q5q5J19J18l4l5l4
-159E21l4L2L3j8j8l63K18K69l12L32k49M2M2o9o8R8R9k27J22j25K24j28j27R8R8O9O9j35
-161D93j34j5j6R4R4j37K12l5l6k96K85k38J10N5N4p0N13l75K08j50j49j94J54L07k74l7L12
-163G35m15J67J18k32L07m2k02J48J7J6j7j8k14J34M1M1J9l30L62k19j17j17J93J93o9o9K4
-165D54K4L73m41j81M01j73J76m1m0k23L60l98J83L8L9PPk11J38K49j01j08j09J98j52M4M5
-167E58j39j38K83o6K88k93J87j62J43k06l1l2O9O9J70m11K67q2j18K31q2q2k4k4j99L83r1
-169D68r0N6N5J43k07J33k16J55j94Q9R0Q9R0k95N4O1O1L4L4j62J86nnl10K71k3k3j6l65L24
-172D82k4Q4k64P7P7l1l2k0j9O7O8P9P8j25j25N9N8J67j82N8N9k48J02q5q4O0O1J77j72J12
-174E14J11j17j18Q6Q6k06k07L32k50L88m26O06m40n2K98k92K90n2n3R3k56Q4Q4J71j78N2
-176E48N3r4r3L87j95m2m2r2r2J04J05k77P2M64n83J80J80k56R3R6R6l18K64m82N65l81l1
-178B29K52r7n3n3J35J36m0l9j2j2j21K28q1q2n9K89k78P2J80j69N2N2j81j81M58j22J24m57
-180A70J70J70Q3Q4l14K69N0N0k51R7r9r9J54J54j37j38QQJ61m22J86J86llj50J98KKj84j83
-182B19J07J07Q2Q1m2m2l08N07j62j62K90k92L6L5R9R9k06J43L4l14K16K16k43J05j13j12
-184C80J95j53P9Q0l25K58p0p0Q2Q2O8k82L57k25j82J68r5K55k91N9J36J37l07M2M9L99j84
-186F42j83K2K2q7K62m2m3k0k1n8n9q0q1J93j55M0M0r5r6J73J73J17k31P4P3j58J90l12L7
-189C37K41j09J31k18M9M9N0M9k06J43J64j84k6L23l83l3M0M0k00J49k01J47J69j79J17J17
-191E76k75P3Q5Q4j55J94k09J41j21j20P5P5P6P5p6p6p5p6J44J44N7N6r3r3j37K13j0l59L47
-193E40kN6N6n3n3j06j05K65q4K2K3k1k2K01j49j48j48L42ol91M22l95M19k93N6J20k29K73
-195E90p6m6m5J07J08m4m4k04L78k11J38j09j10qrJ65j83J42k07K51r8m5m4P9P8l5l6q7K63
-197F58j24j23R5k54J54J55j51j50L30j9j07j06K15j33Q4Q5l17L1J19J20k09J41n5n6N9N8
-199E00o6o5L34k47J5l35Q5Q4O3O3l4l4N4N4r2r1J12J12p5p6J00k50L32j7m6m6N6N6N5N6j26
-202E31j25K0J9P5P4l47JJ79j70M8M8J15J16q9q8Q7Q8j17j16K6K5J35J34l06M3J08J08j46
-204D76j46J15J16j51j51K49j00kjm6m5K09j40N6N7p5p4rrL61J2k28J20k66Q3L2L2P2k78R4
-206C63k55L35j3R5k53J87J87m01J80j62J87K60q9l11K71j76kk0k0m1J32O8k82nJ69j69J80
-208D15r3Q2q7Q7k2k2J00k48L07J33r2r2j03j02Q6Q7k41L41q8q7J57j8k15J35J4J5m4m3o6
-210B96o5K58r1J8J8J4J4o2J12k74P4J94j55r1K59j99L82j24j25q8q9K09K08j52l26L07m3
-212D79J00k50L44k38j29K20j00r9R6k52L21k8JJNNp2J03k11J39K14j34J28k22O2j12j16N8
-214C13J82Pj28l04M10j73j58M24k01J47j99J49lmk45J04R3K68l40J0rrK71l12J6J6K5K5J44
-217E19k9j38K12MNM1M0j04j05m7m8K25j24R1q4j9j8P7r7J97j51p6p5J43J43m04J78J23k25
-219B54K47P3M7l02L81k01J11m70J52J52J66j83n7n7Q5r0J36k13K7L75r6k70L1L1J44k05r6
-221A72K53k51R8J67p%%j20K29l2l2J9l30K39j10m5J30P3j01J71lM2l07J3J4J42l2k40J10
-223B62Q0k69L39L39j63J2l48K34Nl44L68J9J18m64L00m9P1P0j18j19J49k01K43j06K76l06
-225C98m0L08l40j66M17j66j76kO7O7N9N9q6q7R0R0l4l4j65J83kkl8J36L1l18MMj8j7N6N7
-228C35J08k41K16K17l0l1l54K28j00P5p3J00j17K31O1k88O4O4K26N2m90L24k41J08L9j36
-230C47J61j88N6K31k61q6K85o4k3k2L2j42K12j37J21k28L61k20j89J61o4J10J54j95j92j7
-232B03J86J2p5K73k46p1J46k8k7k8J28k20J72ln0J24p2p3j8j8J03p3j00K49j77J72J02k48
-234C43N8N8J9K0j55J94j62J87l15K67l7l7q9q8Q3Q2k6k7K49j01n0L00m82L32k50R9m44L70
-236C98J00J01l92m2L13l6K13j37q6q6j59J90L07n08K0J9o1K89j13K35q4q4J1J2J1J1Q9R0
-238F21K4l25j3j3N2N2L5L4Q5k64J38J38j10j09J92j57M0M0m1m1p8p7L21k61L93j88r1r1m0
-240B66m0J30J31j31j31R8R8k29L52KJJ11k38j89J61K48j01k79O9J14J13r5r5qqQ0P9l0k9
-242D50l02K81j35j34J84J84k52R6j37K12L7L8j54j54N0N0O7O7J18k32k0k1l5L14M8M8k50
-244D18R9j99J49k4k5p2p2L86m28J11J12q5q5N1N0j46K03QRp9p8L27k1l5l6m11M02n6n5m3
-247C75m4O6O6j85J64R1R1l56K26R5k54Q4Q4j34K14q0q1K03j47J63j86l4l3J12k37O8O8K92
-249F91k90L8L7qqrqM1M1k5k5j85J63l3l3J91J91o82L65J94j55M1M0k42J06k4k5K17j32J3
-251D85J3l54K28j51J99n0n0J54J54l08K74ll51J22J23k3l72K31K32j10j11J54J53j09j08
-253D22k0k0n5n6K69l12J02J02J01J00l50jM08m07J03k47K54r6N7N8L4l15J44J43L3L3n5n5
-255C74l0l1R4R3L5l14L55k27P2P2k9l0k38J10J18J18p8p8j00r9K74p4J59J58m33J48k89O1
-257A91O3O2K16j34j20K29p6p6j0j1j56M25n31N1M43j38R8k51LML79m35K85o4J57j91k4l74
-259A5K11K11k11J38%%K1K2k3k4jko6K82q2q1k46L36j01j01K13j37N9N9J7J7j79J69m9m8m9
-262C70m8K16j33j11K38j60J90j82J67j66j66J17J17qqJ4J4k57R3J15k34L2L82l31J9j75J73
-264B78L27k55O6O7k53R5K9K8j%j21M61k44k44J28J29k50L32l98J83l61M51p0p1O8O8k2k1
-266C99J5J5m27J55J47J48K0K1j54J94k06J43l15L4R8R8k6k7POn3K97m01M13j32j32J14k35
-268B16J07J07m7m8L16k66l33K49p1K78m07J74P3P3n1n0J45J46n07L08J6J7j39K11j61J88
-270E44k60Q8K19j29j95J54K4K3KJj07j08K55r3J5J5J2J1j33j34J24J25j60J90j61j61L92
-272E53j91o6o6K25l57R2R2K15j33K75l06%jJ0J0m1L09j15j14k02J47M9M9k12J36j2j3J19
-274D52k30K05K06j57j58J89j61J45k03P0P1k72P8K67l15M56l58K25l57J82J81j11j12L4L4
-276C61PPPOJ7J6p1p1N5N4j13j12K32j16K83k98L62k20j26K24j02j02j31K18J8J9j21K29k58
-278B74L23J19m63j47M33j91j92K19K18k03J45l74K07K44j05j83j83J37J36j06K42k16J33
-280D67k64Q6P8P8j80J69j2l62M44j37l6l5J1J2L4L3j66J83RQj88J62l5l6NNL10k72O7k83
-282A55J76J75k14L68k21k21J38J39j23j23P1P1p4p4P8P8J3J3j61J88P9k70J79j71K01j48
-284C22J09J10n7n8l0l0R3R3R7k52L1L1j4j5j4j4K0K1q8q8J95j53K1K1J72j77K38l44J50j98
-287A92o1o0L53NJ9J9j68J81R3k55R1R2j13j12L42k39J38k10n1n2J31J30m2m2Q1Q1l22K59
-289D80J28k21k6k7L9L9o6o6jjK72p8mnj74J74K55l27k38L43j07j07M8M9k79L03L1L0p8p9
-291C07rrrrM0M0o9K80j35j34R2R1J%k39L42q6q5R6R7j84j84K75p5q9r0N6N6k34J14M1M2J18
-294D48k30K86o3J12k38L30k53J42k07M0M0PQq0q0J65J65r6r6n8n9N75p05J12J13j42K07j03
-296C40K45p4p5p4p3K10j39M2M3jjJ73j77j77J73K5K5J56j93J0J1m8m7L56k26m4m4JJJKO8
-298D89O8p7p7M2M1m5m6N4N4n4n5l04K79J47k01l6l7J10J09J27m55P6P6P6P7J85j64p6p6M8
-301C55M7J21J20m75j27M29Q0K2l28m3L05n8n8p1p0J69J70k69L13k32J17M5l05Q1Q1J41m41
-303A19J70J70k92N7J01J00J88j61L5L6k6k6k5k6j6j7j7j6j03j04R3R4l00N15k49L33l53m
-305B76J77j71J0J1L15k66J%q7K62n4n4n4n4J40k08L9L9K34l49K85o5k17J32Q2Q1j91J58j7
-307D55j7j61J88l57K24J69j81P3P4k08J42J27J27l99J84k1k0K87o2l97J85m6m6J00J00k54
-309B66R6j01j00P7P8l2l1J74j74K2K2K6K5j92J57J20k29J35J35r9j00K4K4K29j20K6K5l14
-311A69K67j91J58K21j28k16L67k47J03n8n7l4l4j3j2p3K77o5o5n1n1J23J23k9k9P9k69L7
-313C02L6J5J5j00j00K02K02j69Nk46L36J2J2l87M27k39J10j22N2q7Q6J09J09l18L0L48k35
-315D05j09O5J9J8J6J6J37k13l5J40k74j00L02m7j5j4n2n3L18l0pql12L7O9O9j8j8K67q3m9
-318D41n0j86j1K72p7nJ70k99N0j14K35k55L26j08O7NNK1K2j86j1K43j06k33J16k92K91j46
-320A85K03J79j69q7Q9L55k26l13j39M85r6k82O7K74l07K01j47K18l64J15J16J56J56m99L16
-322D86K07j41%l48K26N1N1j23P7P8q7q6j30K19j51j52O7O8J98l83K63q5k31L51j82J66PO
-324D22l5l6L14k68j29K19p8p9n1K98j24j24K99n16K91n7J27k21K81l01Q8Q9L8l11L05k77
-326A64R4R4J95j55j77J73K47j02j75j75P5P4P4P5o1o0J15J14k75k75L50Jo4K85j30j29M0
-328C92l09M40j41k94N20l45MJ41J41l39K43k6k6J85l97Q6M36n46K68N1N0j83J67PPk2k2l00
-330A88K82j55j54J90j59K34j15%jk2k3O8O8R0k59k3k3L69k12K6K6r8K51k78P1nnqJ67j64
-332C26J85J00m82J50J51l18L1J94K0M2M2k52R6n0n0N9N9J20J21k5k5n2n2j86L95q9k62L51
-334E99Ll44NK67q2j75J74k51R8J76Jj51J97k57q2J21n4K62q7p6K73k32J17M0j34p7p8N7N7
-337C67J18J17k76L06l50kJ18n6J30k18J64j85P5P5m4k19L82m31L21k61K10j38M4M3l3L17
-339E74M3l05J49k5J38k10K00j49r7r8O1M10n79M68j86j86k3k2J23K98j99J49q2q2l8l8j34
-341A60K15Pj67K20j29J65j83Q3Q3k01J48j08K41k1k1p6p7p7p6J03J03P4k74K61q8J60j89
-343C36j53J96Q7k63M5M4J09J10r6r5l1l0K11j38j60J89J35k15MMk3k2Q6Q7j37K12r4r3K00
-345E05j50J20k29K18l64L41pj3j4j22j23K31K30r0q9r9r9O9O8r5K54q8q8o2o2Q3Q4K1K2j75
-347B77j74N21k93K16j33L5L4m67L46J54j96j45K04N7N6j25j24K2K3JJK44j04p6p5J63j87
-349B55J0J0l9l9J65J64opJ02k47jjJ95j54k65Q4L39k43k5k5MMJ38k11M65l49j66J83j65M16
-352E91l77k8P4P4r3r4L07m2j06j05K15j34OOm5L03k61Q9q7q6Q2Q3m84N62j76J74j76J74N3
-354D99k95M6M6J02k47L28k2K2l27P3P3r3K55o4o4K79l03O2O1l32K49L2L2j91J59l7l8P5P6
-356D56j29j28M1M0q3q3L34k49J66J66j59j60K04j44j32K18J96j53q4q4L31k51j29K20j3j3
-358C78K2K2j60M22j89j89J53j96K49l32k8k7M5M4L94m21K01j48J06J06K83k99K61q8l74K08
-360D43p5p5K24j24PPj75J74k69P9j17M65j24j24J49k01mmL6L5L6L5l7l7l7l7n1n1K77l06
-362A19K40K40l77k9M08o37M51J03j34K14k01J49k08k09K72p8N0M9K8K8p1p1j80J69N5N4j1
-364D23j1k7k7k09L73j02j02J53j97j38K11J01J02l57pjL49k04J46l0k9p7p6K29l53L03m5
-366C98K38l43K7K7rrQ7Q7j74J74k12J36o0o0K56r3r3K56k20k20K74l07Q7Q7J01k47K03K04
-369E95l35J4n0n0K92n8k06L75l73k5J06J06J43k06n2K97J3l35O6O6K2K2J39k10j4j4J09J09
-371E46l6l85L56Qq0q0L7L8L7L7K9K8j5l65M88r4l19K62j59j60J61j89J81J80k99N0J15J15
-373D87k41J07K78l04j58M23l84J98N2N3k29k29L45lkkk3k4q8q9K54r6K0K1l07K75j25K24
-375D33j61j62L62J3l0l1k05J43n3n2P6P6l60M54j99J50NMJJj08j08k13L69o7o7J54j94p1
-377A60K78L1l18K64q5j49K00MMq3K66j70j70L91j90J3J4j88J61j44j44J97j51M59j22q8q8
-379C52%jJ20k30N4N4j8j8M8M7L7l12J46J45m9m9L8L8j1j1J85j63j4j4k40L43k96K86j65J84
-382D86l43K39o7o7m4m5J00J01K0K0J51j99j94J55K19j29j25j26P7P8K49l33K34l48K11K11
-383E31K19n96j03K45K1K0k44J05J12J12mmr2r1P2P3j02K47j95J54j51J98P0k79L54k28mm
-386D36J55j93M4M4Q7m94K96K97k56k56K89o0M9N0k4k3j11j11J03J03L7l11J21J21k94K88
-388C87k18J30J16J16k6k5j14j13l3l4N3N4L9L9m9m8n9n9J09J08K27l55J32k17L68k13NL54
-390F74l73k4O3O3k3k4jjk04J46L7L7m2m1L5L5J29m5k09J41j33K16J6j58j49K00J4J5k47J02
-392B49N1N1n4n4R1R1k4k4j3j3j31M4K07j42Ol41L58J0j03P2l7J37J70m12K00j50R3q1K18
-394D69M3k46L36l21K7k33J16L78k03j59J91K0j54L52k29j05j06O8K42k08J40l6k10m0l9M38
-396E31j43L9L87n83K31Q6m95M28j53R0q5j8j9l0l0q1q2J91J91k05l1J55j94L3L4J1J2pop
-399B50pk3k3J58J58nl54J62J62l3l4k2k3j22N2J72j77j02K47m8J27k42J07kj76J93j56J39
-401C78k10J17J17k8k9j40K08k4k5K23l59k4L25l3l3M0M0m66L49P3P3l27K55r3r4K08j41J06
-403D86k43QQL14k69JJj45K04k4k4l9l9K21l61K07K06m21J60J16k32J09J09k40L42m3m3po
-405C56MMJ13k35J34J34j72j71K19j30O7O7j69j70J29M78j47j47k35J14J0RK28j22K1K0jk
-407D06l1l2K0J9K61l20OPK0K0j40K09l60K21R8R8l06K74p4p4J55j94k0k0K79p0p7p7J5J6
-409C29r4K56j21j20L16k66o6o6J01J02K1K1L92m22J0J1k37J12L8L8l97M15Q2Q1p1p1l9l9
-412C16J06J06l6l5j45j45N5k92N63k50J07J08k92K90N1k97M4M4j11K38k41J08J5J6r3K56
-414D86M5l05J98j51P7P7l2l2J10J10l6l5o5o4K20j30q1q0j03j02J86J86j34K15k77P1O4O4
-416D82J46m36J16J17j87J62l62K20L3L4L10k72L0L0r4r4P2P3j61J88K63l18QRJ97j51k83
-418A32L00j01j01K41j08k1L27o32J82K15j35K95k87O7O6k82N32k32k31K77p2j81j81K92n8
-420C04J14k36K23j27O9P0r8r8K0K0j98J51J37k12K28N4K6l23K44P0j13K37k25n1j2j87K63
-422C50q5mlK65l17L83j98j6j7K33j17k21m8J17J16j12j13L69k12OOJ13k35m0l9J09J10l6
-424C64l6K4K4o3o4P0P0k13J35K6K7m0l9J09J10j64J86j69NJ48k02rL41n03P9L31k50K6K6
-426C49J0J0j03M79k41o6P9k70r8P7L93m21K82o7R4k56L32k49m2J32k2k2J09o6k20J28K38
-428E69l44K53P8k24J25O5k84Q0Q0k8k7k8k7m7m6K27j23Jj73J35k13M86l29Q6Q5J72j78J8
-430C89J9klK0J9k64Q5K59r0p3p3Q0P9j44j44J11J10K19l62K27j22J43k06K52r7p4p4P8P9
-432D41k7k7k46L37k01J49K4K5l17K65K5l25L69K0r7r7O1O2r2r1lL46k44J06N2k98P3P3J53
-435E16j96J75j74J33k16j29K21m2L07k38J10j20j20K95n5k71P7L5L4o4o5J33k17J28J27k43
-437A41J06j38K12J89l92J45J45m4m4o6K83l06M3K18j32j25j24M57j25q8q8Q8Q7o5o5k56R3
-439A49L99j84jjj03j02l2L17r0r0K86k94J0J1J23k26K47l35N69k47k82N32k16k15K06j42
-441B89K1K2j09K39r1r1mlL8l10J77J77j4j3j4j4j06j06K29j21L87j95j73J76J04J05k7k6
-443E47j94J56m12M03o6o6K03j46k27J21P8P7p7p6o3K87m27J54K3K3K8K9n9n9J03J03J25k25
-445C63N4N3N4k96L7L7J24J25l03M7J19J19l8l88M04j77R0k59J91J92j94j94K94n6J11J12
-447F21n21K93j94J55J26m56M71j11K8K7j20K29j05j06k23L59n6n6J6J5J5J5j61j61L27k3
-449D04M1M1l08K74RRo4o4R7k53L1L1O9O9j27K22j66j65J76J76m7m8j56J92j6j7NOm3m2j08
-451B28M74k74k73J41J41nnk23L58k94N5O2O2k18J30j02j03L52k29R7R8j13j14J70J70k88
-453B97O1k6k6j84J66k05J44n1K98j16j16p0K79q5q4k67L16o3K86j12j11k21J28J88j61N8
-455C23N7m7m6M0M1l0l0L04n10K39l41J74J74K03j45j5l64J64J63lmP6P7j49j49J87j61L40
-457E68m74O37m10M0M1nmk01J49l6l5J32J32j36j37J47k02K22K21n78K36K6K7N5N6O8k81j28
-460A30M54l94m5L37k45nJ69j50K4n5n5M4M3J58J57j00k75L60k23L3K07m10J72P8r6K32j16
-462D29j06O9lJ71j78J70l39J0K18M2j82J66k70L12k26n2j68M13r4Q1J65j85l05K77p2p2J1
-464B82J1j77M04m74L42q1q1Q5Q5QRj27M8j38K11J84l98R6R7l6l7l6l7O0O0k93N6K18M3k2
-466C62j96K12j36K7K7Q1k68P4P4k6k6O1O1R3R3O4k85J42k07L3L3J38k11J82j67P7P6J75j74
-468C89j13O1K80l02r3Q2k28J22p3K75l7l7k55L26J74j75O4k84O4O4k4k5m7L03j12j11j99
-470H9J50P8P8k06L75j92J57r1r1O8O8j07j07Q4Q4l38J2M33l81R8R9j10j09L26m86K67q0K9
-472A97K8L05k77N1N0P4P4j23j22J19k29L2L2J25k24K63K63j70j70j8j7K88o1j78j77L31j9
-474D47j12j13R8R8p7p6O1O1j14j13M6M7O8O8j75J73%jj92J57J58j92k4k4M1M2j7j7kL46l30
-477C32K51j41j41O0O1j36K13j06j06J13J12j98J50Q5k64j06K42KLM0l08L75K6j67j67M22
-479F47l92J77j73O1O0K2K2J%j6l65L69k12j45M36j02j01k2k2K62q7J1J2k72L10J09k41j17
-481B32K31j6j6NOp7p6J34J35l42K40j31K18m5l95K39l43L25L25n54K60j29K20j36j37K92
-483D65k90J02J02P7k72R9R9k8k8j36j37M32Q4n85K28J37J37k19J30L01k80q5q4r6K53j40
-485B66K10j73j72J18J19N9k90M30j52o1K88m90L24o0n9j40K09J50k00n4K95l64K17l20K8
-487A78L03k79P1P0k2k3L05k77J10J11k10J39j47j47M9M8J8J9J41J42m60J22J7J91p4p4O0
-489C81O1N4k96K43j06K7K7K7K6k38J10J47k8K5j49L6L5%J75k87O2k33L49r1r1L1K05j99J50
-491D53J42k08k07J41K58r1j8j8j09j09K07l74K59Q4l5l6o2K86n13L00o8o8P0P0k4k5j22j23
-493F0K33N8J49j99N8N8n0n1P6P5n1k26K10j39L6j39K80o8n8J17k6J47l03M6J37k12J26m8
-495B96j67J82M8l01M63j19J22k28n1n2R5R4j74J76o7J06k44N71j28m77J99K3k3k4J97l86
-497A31M26j56j15N9J22k28J40J40l77K05k68L15p5R9m7m8n1K97l58K22k64L17j9j9k66Q3
-499B65K0K0M2M2P3P2j52j53K15j35lmj52J96j31K18J62j87J44m39K57Q2j77J73j38K12n1
-501D71n0j20j19L02m7k08J40K1K0q8Q6L00n14J19J18j40L5J74j74K04l78J95K0R4R3j90j6
-503C48l68M45l8l8J3J3rrl1l0K31j18R4k56j69J81K4j51K65l17K82o6r7r7K84k97K49P4N3
-506D65j22j16K32L7j39k0k1l2l2J15J16j47j46l7l7K47j03p8p9M52j29j41K09l52K31J9K0
-508D12r0q9N1N1N2N1q8q9Q6Q6j27j27K44j05J01J02k69Q0k01J48k6k7O8O8O8O8j60j60K12
-510C90j38O3O4q1q2K16l65L54Ok35J15k78L03J73j76j6L33n12P0L60k22J36k13j84L97l04
-512A74M5Q1Q1k23J26J48k01j24K24OOn6n7M01m12l7l7L20l0k65L16j42j42K21j28J27k22
-514B00L91m23J2J3Q0Q0j16K33m8m7mlj67J81J82j67M7M7M0n41L77K9P3k77L51Jl26K55n6
-516D17n7r4K56l60K22LMj02j02P3P3o2o2J35k15J76J77l48K35m3m4j15K33k4k3j97J51P3
-518C80P3K70q0j01m51L28k2j70j70K15K14j25j25K46j03m4m5K1K1L7L7J6J5R3k55J15J15
-520E05k06k07J06J07j91J58K24j25J20k29K81o9Q1n01M31Q1l92m2K26j22J25J25p1p1PPP
-522C65Pn2n3K31j18P1P1l21K7O2O3J8J9j79J69k6k7Q3Q2l3l83K56r4J90j59nnj2L36m97Q4
-525A70M8M7J37k13j6j7J69J69j00j00k1L29j81j81K04j44Q8Q8l05K76n1n1O7O8j44j43K89
-527D82k91k3L26m51L62K5l25K23M8J25k25J96j54K17j32j15j15L7L7J2J2j0j0J79j69L32
-529E93k49J79j69j18N6K01K6k72P8K84k97m6J28k8k8J03p2j80J68M8j26N5j19J42k07K12
-531C62j38k78L01l9J35k32L49k16J34j14K35l31J7K33N8j01j00J80m02M39j42L01k81p3p3
-533B24O5O4P3P2k6k01P8k72K63q6K13j37J48k02onL8L8J52j96k2L27j15j14r3r3N0N0M9N0
-535C86r9r9K06l76L68J9l23K59Q8Q8j67j67J31J31m4m4KJrj84K07j42M3M4J09J09l0k9k64
-537B14L17k06l1J30m4jj75L4K09p5K74l32J8j79J70N0M9k6k7J7j58K68l14J20J20k21J28
-539C29J62j87N3k95K38K39p4p4k2k1r4K55l07K75m1m2M3j33P5k74J73J74k31J19L3j41L05
-541E37k75RJ0J07o6j85L96l55K25Q0Q0j75j75L7L6J23J23q7q8q7q7J94J94k16m2J80j69L8
-543C62L8n6n6n6n7J57J57j8j7m3m3J31J32j99j98K12L8k30J20o2J12l53K28k6k01L23k59
-546A36K54r6k4k5M1M1o3o2J62J63m79L35P4k75Q4Q5M1M0J23k27J66j83L5L5J4J3k9k8J46
-548D97k03J82j66o5K84M9k99O4O4j62j61O53l95j30K19k46L35j86L95l54mp1p1J69j80m0
-550A78L09j93J57j35j35q4K65j24K24k33J16j4j4l26M86Q6k63j03j04P4P3P3P3N3N3l4l5
-552D23j02j02M4M3q3q4K58r1J15J15m15J66K24l57J15J15j35K14r1r2Q7k63Q0P9J8J9ML53
-554F57m11J71j48K00k45L36n6n7p8p8L1L1k21J27J8J9q4q3M11j71r4K54j01j01K31l51L26
-556E33m89K67q2Q5Q4j98J50j0rj69M13l10j36M08j75J21m61M97l16O1k87M53j27J4j61J39
-558B95J39l08K73J53j95j82J68J79j70k57L24k21J28l2l2L8L7r2K56n18N28j26M9j04P0O0
-560D60j16J03k46J87j63L80k01J47m34K51r8l6J38r5r6J19J19o7o6J73J73l55K25j88j4k0
-562B80J55m2J34K0j54m5m5RJ0k23J25L65k18j96L86j14j13J29m5K25l58J55j94P0P0j49K01
-564D38m7m6k32J17P4j01J42J43O0k89L43k38j66J84P4P5M1l08K99m9k24n0j0L40l95J87R
-566C71J84k55R5l31K50k1k0L7L7j44K04j52J97l49K31j02K46k10J39L0L0N5k94M11j70m61
-568HJ20N35k80N8N8q1q0J6J6J6J6kll36M78l40K41k31J18j4j5j45j45O75l73J3J3N1N1p3
-570C65p2K72l09k93N19j50j50J04J05p8p7J63m18K16K17n9n9q6K62k17J32k4k3M9M9l35M80
-572E83k61Q7j21j20J0J1L85j97l7l7K89o0j85j84Q2Q1m2m2L09k73J64j85l2l3K51r8k61Q8
-575A72J68J68P3k75K69l12r9K50j79J69j35j36K06j43K07j43J63j86j17K32r5r5K80o9J94
-576E67l89N5N5k21L60j10j10R4R3p0K79r9r9q4K65l46K36l3l3j72J78j78J71J71j78J29k20
-579C11J51j99R0R0O1k88J91J92k88O1RRooJ69m12m2L07k63L18l14K67p9q0K99n1mmj72j71
-581A46J74J74j68J81j81j81J83J82j95J53m14M01k7k7j21K27J53m28j31K19k4k3L5L5k12
-583A31L69m5m5J0J0RJ0j7j7o9o8L70m44L41k40r0q9J13J14J23k26J66j83M6M6M7M6j61J89
-585D46r5r5K5K4J34k15Q6Q5j33K16p8p8m9K99p4p4k49J00J13J13j34j34j03K46P2k78O8O8
-587C06L73k08r0r1L75k07j44j45J09J10j37j36L51Kj33j33l8L11k27J22j6j6k27L55M9l00
-589B15P8P7P8P7l22K6J80j70K18j31K2K2K51r8m0m0k35L46m83R8J23J22P2P1j62j62J50J51
-591E34k73P6N4N4j58j57Q2Q2L61m54J79j71K58r1l32K51J36J35j18j19RRK42j07k84K98k25
-593B71J23j44K04p9q0K59r0k65Q4Q7Q6K0K1j23j23j37M44j75J74j38j38j17K33k91K90MN
-595D05k87K95j23j22M80n66L87L8m2l92K60K60k49R9k03k03M36j45J02J02k03k04J8L66j57
-597C52j57K83k99K76p3k91N23j31j31P0P1k13J36j70j70K22K22M8n34K37K37l42K40j96J53
-599C63n3n2l1l1K7K7K6K7J14J14r7r7L40k42q9q9Q5Q5q9q9J70J70j00r9j75J73j97J51j28
-601B14K20j29j28J13J13J27m54K93n5k02J48J79j70M7M8J7J6j43K05l89J93K37j13J09k40
-603B56K19j31R1R1k94K87m21L94n0n0J03k46L72m43L45k36J28J27j18j18L5L4J43k05NL54
-605F72m51J30N8k91M53l62J62j3M5j29K8K01k00J49k69Q0J26m55K99n0K98n17O31m16K01
-607C80j48K88k94J56j93L2L2K34j15L21k61j22j22K96J22m28J54K53l30j04K45L5j41k2J52
-609D20m4J31k10l5J98j52K34j15k68L14j23j24%%J54J54k27n3k09L72J18k32o7J06O4O3k6
-611D43k00j5L34l43PJ52j96K74p5K3K3j38L6J56j93j04K44k93N5L23k59R0q4K22M7l12L6
-613B53l6J38L6j38J86l95K51r7J67oJ57j93K35j13j14O0j14O1J91j57j41K08K08j40k30J19
-615C96R7k51J11J12K4l25P6P5m04M09n0m9Q9Q9j42j42O1O2k0j9O8O7o8o9K22l59N01q1q8
-617C92q9j08K41m3L07l61j1P6P6j10j09N7N8j08K41m3m3p9p9K63q6k05k04k3N59k99K82k26
-619C26L56l10L9KLl04K77k10J39r0M91k14k14K60q9j5j6j56J94j70j70K50r9r9K50q7q6K3
-622B81K3l7l7K8K8J15k34M57J08m92R0J55J55m1l90J70j79L22k59J34J34o8o7j54J94k56
-624A80R3p5K74r4r5J5J4m4m3J52j96O6O6O6O7j41K08m83j33N18o3O4j10L0L0j56J93j76J72
-626C99R6k52K05L0Q9k60J03p2N5N5m60L53L32j8m19J63J0l40J16J15L01m9k23n0L5L4L6L6
-628D20k03k04M49j33M9M8j00j00J73j77J68oQ5k65M07j75Q2r1j3j2j69J80k76N38l56pL9
-630C51M0m8m8K09j41K53r7r3r4m9n0K16j33O3O3j49j49J12J13o8o7P8P8m0m0j49K01O9O9
-632E00J46m36M0j35K25K26m24J58m2J32j52J96j09O5K9l20J27J27J73j77jkK7l21L25k56
-634A21K45j04P8P8r7K52m09o1N35n13R8R8P1P1l80K01j56J92R9R8P6k73J42k08j12K37j77
-636B02J71K6K6p6p6q6K62j01j01K66q3r1r0mlr1K58j09K40l93m3J87J87k43L40k93N6J9K0
-638C77k81L00L8L9M2l07K09K10k32k31K26j22J9J9K0J9j57J91J7J7k23J26P5P5o3o4M6l04
-641H1J71J71j34j35K68q2J15J14j36j36RR%%k1k2R7k53K27j21J25J26J48m34L06m4l41M73
-643E81j44j44Q8Q9L6l13J45J44j46j47P8P8j72J77n6n6K54l28L27k54J80J79m67L47m55L60
-645C81k44J05k4k4O4O3J59j91j24K24L9l11M75l39N1L99l63j5M9M9j26K23j52j52J4J5J59
-647D04J58j03j04OOj98L84l02K81J85j63j73j74M5M5j48M34j55j55K5K6K5K5N8N8k9k9l6
-649C96l5J39k11J83j66QQn9n9K02j46J59j90M21l93J63j87j28M54l97J84q4q4LL53j05j06
-651C23O9P0k58L23j41j41R8R9p9q0p9q0J40J39k32k30O02k12p3p3J02J02l13K70KKL8L9k4
-653D03k3k06L77j11j11J22k27J52J53p3p3k4k4J21J22k08k08K50r9m4m5M07j76j29j29K34
-655D31j15p1p1N2N2M7M6P5k74K32j18l0l0O8O9j9j9M3M3l71K10j2j2L30j9k63Q7m5m4J02
-657C74J03m3m2l8l7n9n9K11j38J31k18m9L01J11k38J24k26L7L7Q3Q4k36J13K18l64J89J89
-660E58p0o9m7m8j71J78j9j8k4k4J73j77M7M6J34k15P4P3l5l5M9M9l8l7J51J51l80K02m3m2
-662C93n7n7k04L77k33J15p2p3K77l05O5O6K9L0l6l5N2N2o2o3Q3k66M78l37O3O2K54l28J96
-664D64j53J36J36k06k06Q5Q5Q5Q5j30j29J5J6k7k6K79p0k39J09L7L6k3k3j98J51j29K20k39
-666A41J11M5M6J54j94k22L61k07J42J05k45J69j79M7M7j49J99j44K05p8p9J69j80J76j72
-668B68K58l24K65q4o0o0ONj1j1L16k65Q3Q4r9r8k7k8O0O0m0m0O9k80J91J91r3r3O5O5j32
-670B41K18j21j20M7M6J1J0J0J1m3m2K05j44R2m88L32L32k44J06mmo9p0o9o9P4P4r2r3L08
-673D45m0j27j28K51r8r9K51r3r4K56l26J32J32q6q6K70l12Q1Q1L4l15L17l2l22K60j19K31
-675D64k17J33k61Q9K27j22R6R7qpr5r4qpqppqppjjQ7Q7k1k1O7O7N1N1k90N8K6K6j71M11l49
-678C20jJ01J01k36k37N41k74l2l2J42J42k74P5KKJ64j85L3L3j65J84O0k89o3K87j80J70k59
-680A30L23p0p0q1q1OPJ08J08j75J74j46j47M29j54j93J55J0J0q7q8r5M87j35j35K07j43r4
-682B60K55n0n1k7k6RJ0j92L89q2q3QPk8k8K61l21j17j17K76l06J44J45k55L27%jo3o4K3K3
-684C26J30J29n53K60J48k01m2m1J51J51j69j70O6O5j38M43l29K52j7j7j93J55p7p6K49l32
-686A70M53l61R3R4j03j03M5M5m2m3j04j03K95n3l9l9J43J42j15j16k8k8N6N6n3n3K47j01
-688C55R4R4k82k82N02p9j27K21k96N4O7O6KJj26j26J35J36j47j46jL47j50J99k81L01k27
-690C04J22l8l8P5P4l61K20R9k50P0P0KLKLm8m9J19J19j82J66l58K25j17j17J23J23qqn8K90
-693E77o8o8o7o8O8k80J99J99l17L2K13l68L84j97K90n9l2l2n4n4Q1Q1o5o4n2n1R4R5j3j4
-695C90j58J90m42L69K2K1j7j6J14k35j90J60L78k04j90J60qqR8k51J12J12j02K47n53K61
-697B60M6M6J49k01M6M6P6k74R4R3p4p4K22K22k94N5n8n9k32J16j1j1K94n5k3k3J51j98q7
-699B42q7L72K2k93N6k71P7J29J29n3n3o2o3J20J20Q8k60K42l41J23k27K53r5K64q5k16L66
-701D97j36K13r3r3K6K6j20j20K06K07j72j72J12J12J05k45k7k8j00K49p5p5R2R3r2r2mnR8
-704C87R7J0J0m4m4Pl42J80J79k63L17l97M18k01J49k01k00M32j50K68l13L04k77L3L4K59
-706F52l23m4L05j31j31m2m1K63l18K33j15m3m3K1K1m5m5k8L21p9q0p3p4P2P1JJJJMMK7K6
-708C69k33J15K9l20J75J76j3j4K49j00q5q6o0K89p5p4J15k34n2K96J48k01J26k23O0N9O7
-710E03k82K60r0J07J07k33J15q1q0P7P7j04j04j16K34J6J5P6k74J27J26j52j51P3P4j33K15
-712D02j48j48K67q3J06k42J17J18p2p2O8k80K35K35r2r1nnn5n5L3L2L8L7m9n0%%J96j52n3
-715B32n3K46K45k05k04L5L6R7k52J48J48l8l8kkL42m73l7l6K64q4j72J77p4p4R4R3K5K5M7
-717E10M7k54R6M5M5j47j47R3R3k87K95l2l3pqJ15J16J51j99j99J51r2r1J05k44K86o2J63
-719E09j86j8j9j12K36k67L14j3j3J00k50N6N6j81J69k8k8p0p1P5P4l9m0j05M76r1r1j64J85
-721D64l4l5j3j3r9r9L52k30J60j90l0l0J05J05o3o2J19k29J92J92l20L0L6K12k23m9N7K31
-723E36p1p2o0o0j0j0rj0P7P6r8r8qpJ67J68k21k20L97j84L5L4j99J50l2l3L16k65P8P8m6
-726C99m5l8l8J48J48k76j02J82j66j7J57P4P4m02J79J03p2M0l10L99j82j50K00J63j86J41
-728D23J41l83K00P9P9j75j75J19J19n5n5k4k5K7K7L01k81M7M7r4r3K41j08K09l73J06J07
-730D31L8L7k78L03k71r6N7K32j78J71N9k90L37k45q2N01l23j49j4j4r5K53j17K31l23K7K6
-732B28K6M3M4J52J53l33J6K71l11j74M08k17J31j59J90J5J6k8k9l12N03j10j10k78L05k27
-734B13J22J58j91L3L3L3L2j88J60n7n8J99j50J33k16J20k29J42J41l16L2J28J27j09j09m3
-736A40m3K53r6J00J00p0p0p0p1R2R2j71J79k99N1J66J67j28j28J0J0K67l16L61m53L17l2
-738C58J14k36K88o1l00K80j28j28K5L73k48J02p4p3j1j2j1j2L4L3L4L3j24j25K24j24J79
-740D10j70K88o1j35j36J92j57P7k72K52r7J75j73%JO5O4Q7k63J03J02k02J46L0L0N2N2j70
-742B90j70O30m18j78M02l53nK09j41j0L39l27K2K11j38q9K60q5k60K65q4k14L67j82pk88
-744D6O2K58r2K98k84K6j48J6L65Q6k63j44K06j18N7k60L22l8l8j69j70M06N6l15K67k90N9
-746B01Q5r0J15J15m8m8M90n58K1K1P9r6K21j28k74P5L30k53opJ21n4J99j50l0l0m6L03j56
-748D02j55J7J8L9L9j24K24k66Q3N2j22j3j3J93J7l31M83j36L9k06J44jko7o7L3L4J93l88
-750A19K06j43J92j58J71j79J06k44K52K53l33J6m5J29j54K0K20j29j18K31o4o4K85k97n7
-752B15n7L06m2l6l6N2N1k24J24J5J5k2k3k98K83K48l33L0L0R4R5n9n8l99M13K18j31J29k20
-755C80q2q2L42k40k2k2Q0k69N1M00kkk99M9k10J39J39k10K41j08m3L06n9n9k34J16llK59
-757E53l22J39J39m07J76j32K17N7N7j36j35K42l39M34j48m0l9K30l53ML53j56J93j27j27
-759C33m1m2L73k08j04j03K39l44L43k39J25k25L28k53J39J39L4L5l44Oj09K40J38k11L27
-761E76k55j46K03l5l5j3j3L9M0j57J92K0J9M2M1j90j89J66J67Q5k64J28k20R2R2P0P1j15
-763D11j16m9K99j71j70N4N5J49J49j70j71n7n8J47J46l3l4R8k52n4K96k50L32j36j35m8m9
-765A83L45k37J99j50J59J59o55L91L8L7k97N2P6P6R7R8j96j97K62q7j68j69J87J88j08j07
-767A76K12j36J98j51K3K4J2J2L4L4j77J72n25N20jjl86J95j35K14l4l3J53J54p2p2l28K54
-769C36J23k26L3L4r7r7L83L4j48j48K8K8K8K8j9k0L30k52k58R1J12J13l62M53j29j29q6K64
-771D47k16J32k3k4q9K60k19J29j76J74J78j70k43L38k64L18j40j41O2k88K51r9J32J31k54
-773B06R5K08j41k65Q5J35J35j85J64k6k7nno5o5M4M4j03K46r6r6p4p3J67J66J05k44m8m8
-775B34j0j1J21k29M59n88K40K40r1r2mmQ0P9o6o5O3O4q2q2J36J37l95J88K2K3opj35K13k88
-778A44K94k29J19L53m62o4K85k45J03J6J6m9m9K28K29l67j9J86j64J05J05m03M10m7m8ON
-780D58q2q2K7K7k13L69o8o7n4n3K10j39J81J82m93R0L65m48N4N5K6K6l9L10j84j85K47l35
-782A85K64q4L1j43J94j54J18k30L1L1J73J73m05J76q3R1j89J60K36j14k37J12n1n2J67j83
-784B17L0K9p9q0O3O2k5k5O4O4J01J00k54L28k94N5qj84Q3Q2K1K0o7o6R7R8q4q4q4K65N8j17
-786C86Q8k61J86j63K24j25j46K02o9p0M0L9lmmmk2k3J27m7K27l55l9l8O0O0P1P1j76kL95
-789F25j87k31J18j29K20P4k75L1L1o0n9K93n6o4J12rj83J39l6j77M04j72Lm08J73L61J1l80
-791A69K00j35K13j28j28k7L23p7p7mnM7l03J36J35J28k20L55k26k48L34N4N4k72P6j66M16
-793F24l83J98O2k86L4L3Q4Q5o1o1l6l7K26j24L0l20J96J97N5n25J20M70k42J06J9l30K80
-795D14p0P6k73J55j93K65K65j73J77q5q5l29K1L18k63J1L61j70j70L78k03m2m3J34k15O9
-797C30O9PPk55L27M2l07K31j19J95l87K02K01l21K7kkL02k80M7M8n4n5J14J13k03J45p2p2
-799B78J44k06J00J00j96J52k47L35J12k37J05k45NNJ79j70K6K5q4q4J53J52n1n1%%j74J75
-801C01j46K04k1k2M65l50J74m08N8N7K17j31J02J01k62Q7KJJ55m28N46k69j45j45L85j96
-803C32J97l86J68J68j30j31L0L0n8K92l26K4N3N3M2M2n3n3l46M66k75P4ooM09j73J11k39
-805C09Q9Q9k84O5L99j82j7j8p5p6K27j23J02k46j97L84L5L6n2n2J66j83k36J13O2O2J28m54
-807G1L09l9K39j10o6K83o05M41k14J36K16l65P0P1j11j11k4k4J51J50J07k42K18l63Q7Q7
-809C62LMl45K37K00j49J06J05l13L5K02j46J91l90R7R7J77j72K4K4n0n0J17J16k98N0L33
-811E67j5j88J61k1k1m18J64O2O2K78l03L4L5q3R2j51J97l95M19k03k8O7O6m6m6r7K52K01
-814F42l80m3L07k68Q1K5K4m0m1J9J9j78J72N1N2r4r4J87j62m2J33k35J14K78l04r4K56J1
-816C96j63K44j05K41j09J01m81M49j32k1l70J86J1K37j11j99J50j59J5J80J79m06J76l10
-818aK69j11K38o8o7R0Q9n5n6M5M4l2l2m2J32k71L11k89O0J07k42O4K38m6k20Q6Q5r9K49k35
-820B41J15K7K7j6j6j6j7noQ2Q1l4l5n7n6J37k13R3R3j16K33k47J02nnJ18m63K34j14L51k31
-822B82J82j67K9K9k00L82k51R8R5k55N0N1O5O5q0q0p0p1L81k01K62q7k46J02j34K15M0M0
-824E26j29j29K49j00k34L48q9q9o0o0J66J65k82O7o4o5J67j82L41k41q7q8L85j97K19j29
-826D08k54R6k8k9J38J39m0l9k44L39k62L19k55R4j2j1j1j2J68j81J5J6k3k3J08k41j02K47
-828C20j68J82k6k5mmP1P0n3n3K85k97K27j22o2o2MMQ9Q9KKr2r2q5K64m0l9l9m0K60q9o0o0
-831C57K8l22L55Nk18J31J09k40J32J33j51j51J05J06j9j8k47J01K9K9j46M35K0K1j19j20
-833C45j41j41K99n1K70l12K8K8L84m30j03K46q9q8O2O3j34K15j8j9j64j64L69K0m6m6l4l4
-835C15N3N4j3j2j2j3j3j3K3K3k60L21ono5o4o4o5J09J08j75J74k1k1J98j52rj0l2l1mmr0
-838B24r1J67J68k69Q0L11k70N7N6K6l23J86J86l55M60j45j44J40J39k61k60K18j31J52j96
-840A25L34j4q1q0j11K38L4l15J38J37Q7k62J36k13J94j55p7N05j64j64P5P5r1r2J53j95J
-842B18JK11K11n82M65j18j18q2K67j48K01k79P0J64j84k50R8J18J17J53j95o1K88l45K37
-844D57j37j37J03J03j4j3P4P4j25j24K1K1O6O7k1k1JJJ75j74Q7k63l7l8L79k03L7L8j1j0
-846C76r7K52k67Q2k01J48Q6Q6j98J52l66K16j40K08j54j55L76k06K29j20J70j78j44K05R
-848C69Rj31K19q7q7K23j25j25j25L18m94O37m08J26J26q5q5j3j4P4k75L50JpoK21l61J12
-850C57J12r7r8o8K81J74m08K17l65K96n18N49l2rrr6K52k01k02Q2Q2K0J9l1l1k81K98K56
-852E49r3j17j17L34k48O3O3j19j19J6J6J7J6O1O2m8m7J45k05Q0P9m6m6M1M1q0q0J39k11R
-854A55L59l33K50J7J8o9o9J88l93J60J59k30J19j65J84k83O6P4M22j55j55K16l66j16K32
-856B85j31K18J51j98P2k78P9P9K89k92m11M02k7k6K24j24p4p4J58J58j62j62J66J65k93N6
-858B50N9N9K98n15K95k87J35J35o5o5Q1Q0j06j07J33J33k57L25m60L53p9p8k68L13L4L3j04
-860C25j05J37J37J95l86r1K59O9k79k5L24o9o9j06j07K86o3k16J33Q9R0j22j22N3N3j8j8
-862C54j06j05J32J31k0k1j25K25j47K03j90J60l43K40j6j5J96j53J49k00k43J06K94n4j85
-864B67J64p5K75n2n2k71P9P8P9j26K24j48j47j6j7n3n2L27k54P3P3O7O8j07j07l4l3N4N4
-866C38o6o6J08J08K0J9j05j04J63m18J98J99k5k4k5k5L1L2J62j87q5K64j30j29L0K9K9K9
-869C70J1J1J2J1j85j85M19O9j32j32RRO1j15K90k93K63q6j4j89J67rR0q5ppj9j8K4K3k82
-871H1L00q8K61j82qJ45l0J12k37m7J27j89J60J2J3j18j19m6L03k86K96k31J17J80Nj81M02
-873G52k46m20J36J36L14k68k40L42k83O5j47K02K8j48J48k7l7l8O6j09K95n4j23K25m72L42
-875D39P0k80QJ82J58m25J76j73J95j53K17j31J2J2j85J65j9L30N1k99J31m3k73P7J11k37
-877A16J54J55q7q8j09K40L8L8j03P0j76J74j98J51jJ73k30k31K62l20M11j71J07o7k7k8J62
-879D15j87K27j21j33K17kko3o2o3K87k41J08Q6Q7o1m10K52r8K05j45j66J83N5N6p6p5j01
-881A72K48N2N1q3q3j04j05L24k5P8k72R9R9r7r7O3O3k64L17n1n2K1K1k73L08j9j9j02j02
-883A68P3P2j4j5PPk08J41J19J19q5q5K43l39J4J5J89J89l27K54k69Q0K1K2j31j31J32J33
-886C94m3m2N4N3l4l4q8q9O5O4J68j81J02J03j40j39L5L5R2R2q3q3Q6Q6jjj67j67L35k47L9
-888B64L9K4K4j65J85J04m76L80k01R0R0p0p0M11j72j9l68L96M6o3o4J10k38O0O0j59J91q1
-890C28q1K61q9K32n83J45J44lmk5k5J62j87L2L1r8K51k29J21r8r8R8R9m5m5j54J96kjo6o7
-892B00J14J14l9l9k19J30n2K98l41K40q6q7K37j12r1r0J44J44j69j68L11l8j6j6n6n5J19
-894C77J19r2r2j14K35r4r4M4L93m49j00J11J11J24k25Q0Q0r6K53l14L5J03J04m9m9k7k7J69
-897E16j80RRj2j3L1L1j44j43K72K73k51k51J85J85j28j27J43k05L61J2j23j24N0N1k63Q6
-899B50J51j97J73j76J08J08j79J69k6k7K8K8J58j90j06K43j71J78r7r6j19M63l76k8N2N3
-901C74J25k24J40J39k57R1J35m46OOJ73J74lkl08K73j53J95J02m81J16J15J88j60M4M5M5
-903D52M5l42PJ08J09J87j62n3n3M1M1j05j05M7M6j50J99k8k7J40J40j53j53J46J45m09J73
-905B86qrM9N0l8l8J06J06j42K08l09K73l59K22k0k0k89K93j60J89j67J82m9m9K56r3j8j8
-907D34o2o1J25k23onk0L29j65j66M0L88j49j49J97j51K3K3O0k89K85o3J49k01j12K36k79
-909A88P0j7j7J00R9k28L54k1k0k03J46P1k79K44j04p5K75l1l1j32j33P1P1q0q0O6O6m2m1
-911B87J03J04m3m4m3m3O0O0k01L80rl58L10k70j59J91O7O8j11K39k41J07j70j71K30j20K29
-913D52j20N4N5j70j69K31j19R2R1l9l9J46k03J5J6j65J84j2j2Q9R0n6n6j43j44k0L29j58
-915B19j58L22k7L7L7n0n0j81J68k8k9J15J14q2K67j82j82j60j59J29J30K39j10q1q1O4O5
-917C46K26l55J91j59p3K76N0k99Q3Q2k7k7K0K1l51M64j10j10L04m5j68J81j25j24k2k1K62
-919D90q7j14j14K71p8L41m73J59j89J0J0mL45q5q6o3o4j09j09J53J53L6L6j45j45j20K29
-922B48o9N13l70k1J83j67j55J94O2k86L61J2k14J36l9l9K01j48k49J01K09l72K23K22l30
-923B06J8N2N1N2N1J9l30L17l3m15L97j03j04J50k00M11j71p1p2K86k97K00j50L2L3j42K07
-925C94K14l67L29k53J47k01R3R3O4k85J02J02o5o5N1N2j23K26l02M6J33J34j94j94J47J48
-927D26j84J66j18j17J98J98l17L1j8j8R2R1l4l4l3l4P0P0m0l9J12k36O9O8j80J69Q1Q2j98
-930C23J51m6m5j1j1j20j19L60J0j34j35K62q7r5r4PPR4R4o3o2j71J78j3j2J19J19k25J25
-932D06k69Q1r4r4O04m42L7L7J75m07L68k14L09m0k00L82j70j71J06J05r0K58j62j61K02j47
-934D09L1L2j00r9R4k54L06m3j24K25PPJ2J2j33j33M9M9l8l8K9K9J38k11klK82l01K23j26
-936C29J43k05J4J3pqJJQ9Q8K0K1j47j47L06m4j30j31K45j04j04K45n3n3j0j0j92J56N5N4
-938D35K62n53J68J67r3r2j14j14M18P0m91L24p1K79l98J84m0l9K15j35j72J77k23L59j56
-940C67j56J20J21j92L91l37J2K9K9n9n8J22k27J66j83M8M7J72J71j66j66J6J6J36k13P1P0
-942C47J6J6j15K34m4l93L92m22L46k37K15j35K19j31K2K2J29k20J22J22n5n4l3l3j74J75
-944C31m3m3J70j80J7J7P0O9MNk07J42p6p5J48k02n5K93M2M3k4k3k9l0qrk42J06N6N6L5L5
-947C93l36M79m7m7l2l2L38k44l31K51l3l2K5K5j49K00k00k00J86J85m0m0k83L00k8k8L5L6
-949C51j39K10k10J39J60j88K9L0QQjjjkK1K1j54J95k59R0J33k16l4L16m9m8j9j8J05J05l39
-951B43K43k80k80N18k95K13j35M1M1k36N79q9q9k35J14l8l8n3n3M27j55q2q2M10m03l3l3
-953B20k3k2J45J45j44K04RQj54j55L04m6J5J4r5r4j8j8j04K44j05K44j92j92M4M4p9q0K39
-956C58l43M35j47k20L62m23L90l01K80K00j49j2j1l82J99J56j93q1K69m4k18M11j71P5k75
-958A65O0K35j83qJ23k27k4L24k17m3J60j88j02K48K7j47J69nj55K0K49l33N1K25j31M3K05
-960E41l76K67q2p5K74j18k93J49k6k29L52L53m62J09o6J36k12L00k82M0M0k04k9K47j01K39
-962D92O6m53J29J91J91k61Q9j96j95J56J55Q0k70J45l0K32j17L5j39o2o3J64J64n1n0J5j60
-964B57K44l38K89n9q2q1L03k77j3J62j56M25l01M7K4j51K8K01r1Q3nj79L8j38L8L7j0j1j0
-966B74j1qrJ37J37j10j09k3k2Q3Q3m0l88J95J96ppj85J63p6N05n65k15J75J77k4k4jkj52
-968A47J97J%J25J24m06J75m7m8R8k51K18K18l13K69J12m69J56J56l7l7l7l7RRN9O0l28M87
-970F10j75j75N0N0k77L05m1m0nmN1N1j96J53k27L55j47K02p8p7l4l3j74J75k1k1k6k6k79
-973e4N32J6J6k53R5K20l62P5P4L6L6J4J5L7l12K26j23Q6Q6J88l94R4R4l0l0j5j6j5j5j9j9
-975B83j9j9n7n7j09K41L8L7j37K12o0o1l9l9J54J53k46J02l4l4K5K4j70M12l80K01k42L39
-977E18R2k57j65J84n6n6K90o0m95L18L2L3j12j13L13l6O6k83N4N5L3L3p4p5J44k05O62l85
-979D55j30j31J53j95J60j89L13k70L20l0M9M8j69j70J60j90K03j46J8J7J8J8j78J72k5k4
-981B57J06J06J2l38K17K16m39L76k09k09J32J33N4N4k73L09o4o3J18k32j27M54j85j86J04
-983C23J03K35l48Q5k64P0P1R9J00p5p6L2L2j65j65L73K5p0p1P1P1j04j04j7j6l9L11j01j01
-985B85R5R6m1m1M6M6j22j22R7k53K9L78j31j31J09J09j82j82J56J56k15J35K7K8j83J65K08
-987E62l74M33l82R4R4m4m5J2J2J43m39L77K8m08M06l03K79o3o3k25J25J5J5P6P5m8m9L07
-990F10k76j45K05o7o6o7K83l0k9k04J45l5l5R6R6l06M3K18j32l6l7J16J15l1l1P9k71J29
-992C37J29j55J94k00J48k6k6j13j13j13K36j54J96o7o6J32J32o4o5P2k78N0L99l20K63m14
-994A14M00q1q2rrj45K04QPr9j00R7R7k62Q6O4O4r3r3L28k1m04M10j57j57J34J35m1m0K9K9
-996D13l7l6j97J52r5r5M74l40K27j23P0O9l9m0k3k3J95j54j40K09k92N7N8N8ppQPj01K47
-998D95j89j88K91n8J21J21l80l2K92n7L8L8k61Q8J75j74LKJ56j94K28j21n6n6N3k95L00m8
-1000B92N4N5j64J86j6j7K1l29M15j67N1N2m7m6m7m7L0K9L0L0J7J7j80J70j40j39K24j26l2
-1003A76l2R1R1N2N2K3l25K93n5n5K94k92N7K7K8l2l2l3l2M1M0k87K95n4n4J79j71N6N6j62
-1005B35J87nmo9p0L8L8L7L8RQJ11m71K46j03N7N7j2j2J85j65Q8Q8j15j16j12K37M1M1j14
-1007C73j14J12J11k08J40p8p7K52r7k43J07JJK2K3o9o9J13J12l58K24O3O4j9L30k44k44J2
-1009B40J3K30l51K67q3K75p5n9n8R4k55J68j82J5J5j06K44o1o2j50M31k15J33R7m85J85J84
-1011D49j50j51L23k59J5J5J75j74nnR7R7J50k00j12j12K51r7o8o8K73p5j99J50q2K68l06
-1013B00M2jko7o6K28K28l46LL2L1J05k44J62J62nl55K73p6R9R8j90j89K90n9K23l59L4L4
-1016B85J22J22k99M9J64j85p6K73k8k7J68j81J24k26l0l0j24K24K8K8p7p8j42M38K0J9l1
-1018E30l81L00n0R6k53K16j32o7o7J74j74M4M4k30J19L01m8l09K72J0J0m0m0j9j8k06J44
-1020B26J29J28k31L51j22j22k6k5k6k6P7P7o8o9J05J04l68K13L6L6J45k03K68l12n9K91l4
-1022D95l3j79j80L54Nj99J49k5k5k00J49k4k4k3k4K31j19k49L33l3l3L9M0k97K84j52J97
-1024D57r9j00K07j43n9o0M3M3j54M28k99N0Q0P9q0q0j70J80j7j7o8o8L24k57J22k26M43j39
-1026D20J23k26R8p7J79j69J25n0r0Q5R5k53p9R5K66l15L28k53J60m20P0P0N13l01k20J29
-1028C03m9J25K58l24J12k36J51k3L14m99N36k78L1L1K0j54K48j00j67J81j60j60L57k24J03
-1030C96J03p7p7O8O9q0p9j20k93P09j05K2l26J63j86L31j9n5n4N7N8o6k41K94k88j4L36r0
-1032D36r0l2J43k46L36k70L12k23l96K77p0K02K02j46j45J39J38k92N8J88l93K30K30l00
-1034B88M8j87J62Q6Q5n9J14n38K74R9p4R6p9j49K5K58r1J5J4j8j8O0j14Q2k67L19J45j35
-1036D41j34K99k82j73J76K73p6l9m0j87J63k05L76k55q1m1N41o73J40M03m12M29j53N8k90
-1038B58J56J56o9o9j10j10L6L6j0rJ10o4l0L20j71J77j14j15ool9l9M8M9OPp0J04j38K10
-1040E04l17L1J34J34L2l17R1R2j16K33j97k4j28K20m7L02k65L16l45MJ27k21J17J18k35J14
-1042C57k9J45j13j13j16K33j70J78q4k60M28j54J09k40J74%r8P6L3L3L5l14K42O7J0Rj47
-1044B91j47O6O5m4L06j21j20Q4Q3l39K41L9L8k93K90l8l9RRO0N9l89M25l3l3j07j07K35j15
-1047C75rrl0l1J23J22l50K31o2o3J33k16K53l30J21J22l3l4N4N5r8r7J06J07n8n7L0L0QP
-1049D00n7n8n3K97j83j83K15j33J14J14k95N19k00k01ppL05n09K41K40j5l63J29k20L91M2
-1051E23k71L11j03j04j11K38k4k3k13J36K67l14K4K4m9m9L00k81j29K20j76J72L4L5k81L02
-1053D58k01J49k01J49O1O1k7k6k22J26J14J13j48j48K78p0p7p7Q0Q0K62l19q7q7J53j96N33
-1055G31n15n6K93r6r6R2R3j62J87j18j19L05m4j09j09K8K9OPR2k57L76k06q6K63j15j15N1
-1057C50N0j68J81J83j66j15j16J63j86K06j42nnJ70j80P7P7j05K44m42J39R5R5N9N9k03k02
-1059A13O3O3M1M1O9k81J41J42j90J59j82J66K34l48K3K3j03K47k34J16M7M6K65q4n7n7k09
-1061B54J40J36k13J65j84J35m45M32Q4m1m1o3o3j5j6J81j68J20J19q5q4J60m22L79k04O8
-1063C29O7j73j72J23J24n1K99l24K6N4N5JJJJL6L5j61J89m3m2n7n7L56k26k26L56j21j20
-1065B80K21j28k50J00K6K7M2M1k50N65l42Pn1n2O2O3R8R9m05J77k02J48J56J57j42j42L6
-1067C41L6J46k04j8j8M8M7poj82J68j34K15l23K59L19k63m5m5rqrrJ3J3l8l8M61l53p7p7
-1070B03p3K76P2k77J48J47p0K78j59j60O6O6j46j47J52J52k88K93k30J19k5k6j64J86k13
-1072A80L69q2q2r4r4J96l85N00q1NOp8p9L1l18K16K16j04j04L59k23nnJ61j88QPQ2Q1l34
-1074A61K49o3o2J70j79ppp2K77K6l24j0L38p9q0J17J17j20j19j1j0j66J83O0k90M03j78L9
-1076C63M0jkK32j18l41K40L0K9J23m58M2M3J23J23K9l21J56J57m0m0m3m3m4m3R5R4k76P3
-1078B22J39J38k10J38l1l1rrJ10J11j80j80J05J04J05k45J52j97m5L05r0q9m6m6p0K80mn
-1080D22n4n4m0L09l84J99Q9k60N8N9L6L7p5p4J3J2J51J50l59rJ87j63K52r7n7n8PQR5R5n8
-1083D37n8j54J95J08k41J5J5ppk0k1J40k10K64l19M45l69L2L2j9j9O1O1j13j14K21K22l97
-1085A80J84o6o6n2K98o1o1j7j8j10K39j32j32J25J24L7L7q4q5q5q4L1L2j43K07o7K83J30
-1087F44k19%Jk18J31j8j7l23K58K3K4j36K12j6j7k12J36K32j18p3p4J17J17p9p9K27j22n0
-1089C51m9K72l10K14j35p4p4K32l51J88J88kjj98J52o6K82k08k08L00m8l1l2q9r0K48l33
-1091A28M30l84K52r7M8M8L0L0l19K62J25k25QL58l89l9L97m17K25j25J74m09O1O1LL51j13
-1093D74j14p0p0r0K59L46m68k9l0J81J82j52j51o4K85j81J67r4r4m9m8L00k81r5K55o6o5
-1095B38l8l8L03m5p6p5l2L17j12j11j41K08j30j29L64k16K04K05m06n7m0m1N05l10Q0k70
-1097A57k9l0N13l01j0j0J90j59M08m06J3J3l29M86k13J37K8K7k61L21l33K48o5o4k8k9M4
-1099C18M3j53J95q7q8K98n2l02M6R0R0R0R0m55L59k58k57N12l01M8M7k5k5J72j77J9K0O2
-1102C19O3q2q3rj0K74p5q2q2M2M1%%k9L20l53mJ42J41k13k14K44j04O6O6M5M4m1m0j9j9J6
-1104C64L65o10K05J%K9L0K6l24K15K15k08J41l3l4j48K01j04j05K70q0k8k9n0n0j16M66j38
-1106D71j38r4K55l6l7j59j60J37J37j46K02j94j93m8L00M7M7r8r8J70j78J27J27K01l81J13
-1108C74J14k05J44n2n2P5P4j07j08j29K19K4K3j05j06J56J56j65j66J54J54r9r9L16k67m2
-1110B81m3L94j89m7m7q4q3J52J53Q7k61J8J9j99J49q1q1OL55q8q9J96j54K27j21k52R7J73
-1112D88j76m5m5R7R7m9m9K0J9o7o8M7M6k00J48j47M35j84j84J91j58O0O0k52R8J84j64J40
-1114C42J41n5n6ooJ02k46k4k5L25k5m5m6j76J72J0RN2k96J25J25onP6k73J19J20j63J86J1
-1117D62l37J02J03j38K11L0l18J90J90j48j48K22j26qqR4R4L11n02L63J3m42J40J62j88O2
-1119C86O1m7m8m6m7R2R1K43l39j2j2L0L1j29K19l03K77nok59R0J98l82K82o7R4R3llJ13m68
-1121A24L66k16m8m9M11j70j7j8J9J8o8o9J85J84k23k23L5L5J59J58l52K30j20K30j23j23
-1123C35j99J49j00P5J59j91K80l01LMJ34J34J85o30K16K15j26j26O9O9J78j71q1q0J09J09
-1125D18k89K92m6J29j45j46J85j64M85l30R2k57K75l06J96K1j40L5J2J88j91j6k13J37L9
-1127B61L9j35K13JJj51J97k17J32j52K3J12o3M7M6QPj01j02L95M6l55M60l97J83l25K4M26
-1129F23j56n8J16k86O2J50j99J72lk17L64l87J95j29M6P7k73K19M4j21N5p7K72j42j42K51
-1131D56r9j3j4M1j33L10l9k47J03L5l14L91M3m3m4L4l16K32N8m1m0j7j7j04j04J20J20L3
-1133C91L3RRj65j65R4R5K04j46r2r3K78p0l0L20o11K03j86L96m0L08n74PL57k25j95L88l69
-1135A31K12j79J69j87J62ppK11j38r2r3K57r3M9N0j69J80l4l4m8m8K95k87J50j99Q9Q9j07
-1137C22j07J39J38j4j5k60Q9M5M6K25j24k98N0N2N2j4j4p2p2L42k39O3O3J2l37M10j71J34
-1140D45k15K23j27j98J50L74m41L9M0O8O7j9j9j13j12O3O2M0L9M0M0K8K9j67j68J83j66K04
-1142C89K05j37j37L7L7K0J9M1l08O6O7o5K85n9n9j25j24J30J30m5m4O9O9m26L89K58l23N4
-1144D13N5j28j27O8O9j12K38k42J07m8m9k6k6J21J20n3n4n0n0J25J25j74j73K33K34k17k18
-1146A61P3P4M6M6m2m1N4N4o9o9k46N68o3o4j17j17%L49k68Q1noj5j5J82j68J8J8j13K36j88
-1148C54j88K05j44J08J08Q7m95L57k24K63q5q6q6J03J03k42L40j84J66q4q3J56j93p4K76
-1150D58J66j83L3L4j85j84L35j4q6q7l0L19P2P1m04J78l67j9K40j10K2K1Q9Q8o4o4q2K67
-1152E14N6k93J99l83N48k67j88J61%JK7K7J58j91j37K13J6J6k04J45j4j5k13L69M1M2p4p4
-1154D80m44L69j5j6K31j17j17j16O5O6R2R3n3n3j40j40L55Nk55L28l06M4l4l4j2j2L6L5L6
-1157C71L5j5j5l28M87j90j90K2L70l69K12J84l98M16l98K41j07j37K12r3r3J12J12l3l4n1
-1159C23n2l42M71j19K30q2q3J53j96k2k2J68j82O6O5K21l61K93k89M5M4k98K85j62J87NN
-1161C51K60r0j33j33j32K17L5l14L08k74M25j58J66j83J81m01L89j92r7K51p3p3K54r4O7
-1163E57n15K05K05R2k58Q4Q3nnnoj03j04M2M2MLMLQ4Q3j13K35q0q0j46j46K01K00k71L09
-1165E99n7n7j08j09L0L0n7n7K6K6J50J50m42J39P4P4o7o8J57J58k58R1j93J56k14J34K87
-1167E94k94L7L7k1k1K39j10k63L19M7l01mlK78p0k38J11R7k52P4P5J84l97K13j36j1j0J13
-1169B87J13n1n0L7L6j8j8M7M7M7l02K58r1r6K54n1n2p3p4L19k62J82j67j38K11J51j98j76
-1171A72J73J62J61n36K78J4J4J16k32O5O6L7l12J75J75k47J02j00j00K05j43R8R8l38K43
-1173C46j5j5K1K1J6J6L7L8k74P5P6k74J02J03p9K69l52K29j1j1J56j92J12k36P9P9K03j47
-1175C72L96m19J7J7opK33l48P7P7m7m7RJ0RRl4l5P5P4K32l50J74j76O4O5m5m4K4K4j71J77
-1178D06O8O8j36j35J59j90POO2O1K43l39L6L6j75J75j92J58j25j26L56Q%%j46j45K32j16
-1180B56J68j81M5M4K58l25J99j50m5m5P9P8l0l1l1l0q0p9L42pK75l07j25j25L0L79k65Q5
-1182C82m0J36n0n0R5k53J06o8K50r9j61J88L27m87N8N8J38k11l19K61q8K62N4j20M6M5r3
-1184C67k67L44mk56L27l87J96m8J26n2n3p0K79j98J51q8q9nL44j13j14q7q6J53J53k98K82
-1186E07o6o6J83j66k8k02J58j5K4J98J56m27n2n2M46l68qL41k08l4J34m1l7l8M9N0j76jm5
-1188B16L04k01l75N73m74J92j57K79p0o4K84k75P3J4J3j24K24l32K49k02J47K29l52L16l3
-1190D54k45L36j58j59J15J14j58J91j48K8j48K02j00P4l07K74j51J98m10M05j60J4J41k08
-1192A94K92n8r4r4M67n79J77J77j58J91j91j6k7k7K46j04R2k57P0P1l28P19m08J74m73L41
-1194C97q1q0J10J11M1j33M8l00L21k8k49L32j26M9R5p8j55J94j66QJ76JL1L1k63Q5RRQ2k68
-1196B03J87J86j77j77K81o8l9l9J31k17K22M8j05j05L0L0q0p9J82J83j67j67L7L7o1o1M7
-1198B62M8j61J88KLR6K72m85R7R7p8J44l0L5j40j61J88j4j4j96L86k96K85l25K4K76l05K40
-1201D38j09NOJ28J29j8j9o9o9l85J97J10J09Q1k68P3P3L4L3k50R9nnj57J91j46K03j17j17
-1203A75J81J81l28K53k30J18m2m1Q3Q4q3q4K51r8LMk73N42p0o9l87M28j18j18r9j00K93k88
-1205A68L10l9k94K88l3l3L9L9k56L26J08k41r9j00L52k31M5M6L35k45n5n5mmm3m4K18j31
-1207C67J91j58L9L8l00M8J14J14klklq9r0L4L4J27k23K58r2n7n8K04j45j9j9j51J99J2J3
-1209C81L4L4K9K8j96j97K29j21J64J63j24j24l7l7N5N4j64M17k63Q5p5p5J08J09J01k48k5
-1211C05k4M1M1o1o2K22j27k9k8N8N8j20K28r1r1L08k73n5n5J32k18k9N53k54k54O6O6j51
-1214A56J97k02L80l73K10M9k99K88o0J79m02J16J16K10j38j23K27l6l5j22j21j65M16l52
-1215A16mM0L90J74m07K04j45J65j84r7K52j41K09k28J21j67J81l13L6L12k70J23J23n5n5
-1217C80J1J1k11J37L6L6L04n11L61k20p5p5K67l15M62j20p7K73m73J09J46k04Q7Q7m4m3K1
-1219C60l27N38k76K66n48L32k50K46K47l79K02m9m9j2j3J27J27j92J56k94N6MMJ39k10K19
-1221D24j30L50m65N9N9L7L7L8L7n3n3n3n2MNM8M8p1p1R6R7j32K17m15J66J85j65J78J77k70
-1224C32P9k19L63k49R9j47K01k44J05j20K29j6j6OOo1o1J06J06k53R7j3j2l9l9M8M8L2L2
-1226D00k09J41j38j38O03k11r9r9L82k01m5m5l8l8N0N0n9n9K76p3q0q0M4M4k40J10L3L4J80
-1228D95J79m14J67Q0k69L1L1P5P5k58R2O3O3k02J48j22K27Q6k63K0K0J82j67N2N1l82l2M04
-1230D32N5j20j20J79j71K04j44K9L0q9q8J37J37k25J24q7K63l69K13j06K42l51K31r6r6L05
-1232E19m3k11J38M7l02L16l3J6J6onj71j70J50J50OOm08J73K4K4L00k81K9K9J5J5r9K51j86
-1234C09j86l9L10K7K7QRj01j00J90j59K78l04Q6Q7n9n9M7l03M83r9m1m1RJ0j0j0K6K6j87
-1237B34L95p7p8R9R9n63K51J2J1m6m7J77j72L15k67K45l37J9K0J88j60J59J59m04J78q4q3
-1239B43L01m7K5K5l19K9L7L7n0n1J17J17j82J67K11l72ONJ87j63n4K94l96J85K2K2K2K1K99
-1241G38k82j60j59J12J12j2l60J60J60M29l84Q6k63Q5Q6m8m9J84j65j39M42j90J59o3o2m1
-1243C76m1J34J34k66Q3k6k7j78J70j12K38N5k93J46J46l26K3M08m07K48j01J05k45K57l24
-1245A77J35J35o8o8J70j79J8J7j9j9L2L2K42l39K93k89J80j69rrJ89J89n16O5J14J14M2M2
-1247E02l8l86J73j76L59k23J92j58N4N4l4l3n5K94k23k22J08J07k12J37L65k18L13k68K5
-1249D37K5J1J1k13J36j11j11q4M98l2l82K24j25O0O0j46K7j72M10k79O9j92L90J56m26J85
-1251D26j64L03k78j59J91j8J57M4j30p4J00P9k71J94j55NL54l20K61k66r1L43k40R9R9l9
-1253D50l9j7j8j84J64j63J87J64j85J43k06O9P0O9P0k38J12o7K82l02j27q0q0K75p5r6K53
-1255D31P6k73K40j09k0J54k31n6K45j03k0j9j00K50k09k09J47J48l5l4L05k76n8n8J66j83
-1257A69L77k05l03K79J48k02k25L57j89j4J09o5o6J10O1j13lJ70j16N8l0k9q5q5L37j3k17
-1259B15J31j48K00o3k38L04m5j39K09l50kJ44J43M1M2j33K16j84j84J14J14l00K81m8m7l3
-1261B40l3J50j99L76k06K03l79N8N7l9l9r0K59L9L8k6k7POj6j5P0k79J42J43j16K33k18k18
-1263A21L26m88L90M3j41K08l1l2O5k84J37J38J71m11J20J20K6K6l16L3k7k6J41J40l0l0j90
-1265A99J59k63L18J4J3P1P1k12J37j78j77J86J87J53m28n7K92Q8k62M5M4P1P1p4p4o5o6L13
-1267E76k69k94N20LMj2l61K58r2j57J91J70j79p9p9k60N53J12k37O1k89J55J55j51j51K54
-1269D02r4j82J67L8L7J25J25n42N04o2o3k01J47k23J25k03J46K98k83L6L7J09J10l47KM6
-1271B54M6J16k32J10J09o5o5K2K2onQ2Q1k2k2n8n8J63m18M18j64J60j89l0k9N2N2l5l6N8
-1274C11N7K1K1K61l21J67j83K39l42J59j90K1K1J95j54N4N4n6n5m5m4M2M3q3q2J21J20N2
-1276D04N2j45K05j43j43M6M7q5K64p7p8N9N9j59J90k4l72K23K24j20j20LMK31j19j69J80
-1278D37l03K78L8L8J8l31J0J1J20J19k5k6J7J7p0p1J61J60n7m07L19k63N01l14K9K8J51j97
-1280C88J03k45P4P5L6L6j38K11k36J13k58R1L3L3J21J20o5m14J60N09l52lj13K37q9q9jk
-1282C35J58j90P8k71L43k39K49l34N0N0K32j17j20K29J20k30KJj29K20rqj32j33J74J73J3
-1284E15l35P0M20m24J58K05l76P4P5M9M9l65K17J03J04k38J11n7K91k25k24J84j65J91j57
-1286B50J83l97K85K86k53k53J84J84m6m7k42J06R2R2l2l1n6n5J41k08opK34j15K54r5J4l35
-1288A27J45J45L05k77o9o9j8j8O7O7k38J11J73j76K1K1K33j16K11j37j36K12n6n6l45K36
-1290C63J93j56l3l3n4n5Q8Q7j09K40j42j42Q4Q3o7o7J36J36j17j17rqj83J67N7N7j18j17
-1292A64J66j82J62J63nnn4n5R1R1q5q6K64l18r9K50o9p0r3r3K49j01k4k4R9J00o6o6J74J74
-1295F52l35K47q0q0l7l6N1N0j7j7k13J36M3M3k19J30P4P4j66j67J76J76j66j66L61J2j70
-1297C56j69M6M7K43j06O3O3k4k4k44J04j13j13K18j30K62q7o4o5P3k76L86j96J09J10o5o5
-1299C39Ql42nL43J77j73m9m9J54J55j28K21j21j21k1k1Q8k61M8M8MMN7k92N07l07Q9Q8j4
-1301D26j4k11L70m5m4QRJ83j65J63j86r8r9KKL73m42J09J09k03J45k01J47J91j58j86J64
-1303C49J42k08K4K4L07k75J71j78j8j8MMJ94l89M30l85QL57k48J02n2n2j11K37k4k4o5K85
-1305E91l69k1J00R9j62j63L02m7o2o2k25N88k11J38j21j21K5K4K36j14J12m70M06j76K24
-1307E21j25L1L2m2m1j40M42m52J29J98l83L21k7pqQ0P9l91m2k0L28l26K55J1j63K68l14J12
-1309C26o3k9J46j48K00q7Q8k06J42M8l00J32L07l32J8K14j35j32M3L38k44J10J10j00j01
-1311C45l5l5J61j88M1M1j8j7L05k77n9J15J18n7o1k36L51k31j4j3J03p1m6L03k97K84J6J5
-1313E43m17J65J2J1M2M1J28k20J01k48L20l0k55R5K25j24R5k55P3P2K63q6j26M9k70L12n99
-1315h3O78k98K84k36o1J09J10l82K01N8N9K9L0k18J31J32k18l8l7K7K8o5o5J31J31k29J19
-1317C27q8K61j21N4j54J96J72j76l29M86j69j69N6N6m7m7j05K44J47m34L07k74L30j9l4l3
-1319D37n8n7J03k46M03j79m7m8mmL23k59j05j05J72J71k10J38j67J83o7o6j54J96L5L6j17
-1321C04j18J72J72l15L3Q9Q8o5o4J4J3N1N0k88K94j2j1k04J46J09k39L85j96K62l19q8q8
-1323A75M94q7j28j28L2l16K04K04j4j4J64j85p6p6R8R7L3L2k11J37k33J16n9K91k33J15j31
-1326C01K18j32j31O7O7M6M5O7k82k60L22J32k18j81J68NMj0j0K44l38M25l88K29j20O2O2
-1328C94l18K62m2m3j64J85k3k2J45l0J67j83Q3r1j5j5N3N3p8K71J57j92k58R1K2K1J63j86
-1330D07j58J6P8P8R7k53J30k19J38l5MMK78l03J98j51J33k16K63q5L02k80J71m11k2L27l
-1332D88J71r1r0N5j20k88K93k85K96n2n2L00k81J16n7m7m7k17L65m57J25M19P0k71P8k8k8
-1334C65j04K45q3R2k7l77K0L69k49J00L5L4l0l1n4n3L4L3k6k6O1O1ooj6j7J87J2m45L69l6
-1336D31k10%j74M05j78J61j4j26M9O0j14p3K76%j75K33j16J41k07k04J46R1K65j84j84j07
-1338A92K42r0q9K0L69l78l0J16J17r1r2J06J05m91L24j99L82j05j06M1M0j6L33m16o7q2K68
-1340D03ONj64j64K72p7K55r3ool6l5J61j88k4k4P7P8k57L24l07K73j80J68L0L1k31J18k09
-1342B00J41K54r4l12K69M8l00J35J36q8q8N7N8m3m2k1k1j50K00R0R0o8o7J9K0M5M5p8p8j37
-1345B20K12Rl40J69J68k16J32l48K33K12j38k5k5M1M0K5K4K06l76Q8Q8l6l6M4M4K3K2J57
-1347F17j92j8j7R6k53L0L80l69k1RRM0M1O3O2k56R4j6j6O8O7J91l90J06J05k14J35llN5N5
-1349D55l72K09K8K8P2P2j32j32J51J50n4n3ooooq9q9J14J14j3j3j3j3l5l5j3j3j42K07o1
-1352C04K87P7k73p6p6J11k37O9O8L50k32RQq5q5j36K13J8J9r1K59m98N49l01M7P2P1j11j10
-1354B20J02J01o5o5J56j93j8j8K09j40N6N7l1l1P8P8k52R7j3j2K8K8l8l8j09K40j02j02J09
-1356C32J10M3l05jkL41rk06J42J21k29J16J17l42K40L9l11M02N3l20L0J16k32q1K68J00k49
-1358B83O3O2j56J93j16j16J68J68p3p3p3p3J10J11J83j66k22J27mmL2L3J0J1P9k70J22k26
-1360A83J08J08K1K1k14J36j33K16J70j79j57J92j40j40K01K02o1o0q2q2J70j79J99l82K19
-1362C37K19m79L35r3r3j29K20r7K52k13L69l44K37n4n3p9p9J03J03M1l08L61k20M5M4K13
-1364F38l70j42K06O2O1L9M0k6l75J26J26m1m1J23J22j03j03J31k19O5O5r0q9J14J13m8m9
-1366C35k7k7j39K09K09j39j96j95K99n1J8J7j14K35j38j39J45k04L01m7r9r9j24M57p4p3
-1368C40J9J9M8l01K32j18N7N7m4m5K61l22J70j80J47J48k76P3k2L28m9l97K20j28R3R4p4
-1370C50p4P9Q0l21K9P7P8J35J36l82K00J8J7o0o0J07J07k33J16j38K11l32M84k73k73J39
-1372B17J39J6J5L32k50j85J65k01J48Ll46K99n0J5J5k57L25j77J71j93J55J05J04l93J88
-1374C60l0l0j25K25q1K68j34j33k5k5P0P0J21k28m9m8J7J7LKLLP5P4P5P5p8p7J18k30N3N3
-1377C89K05j43J15k34K7K8J01J01j02j02p0p0J8J8j0j0K74p5m8m7P5P6n9n9n9n9Q9Q8n7n8
-1379C42Q6Q7j54j54%L50l05M4j3j4L72k10k48L34l0l0p6p6J21k28MMN71m75O5O5%%j09j09
-1381B14R4R4r5r5J89j61J14J14j91J57m9m9k8k7j1j2j1j1M7M6M7M6Q5Q5l9l9j44K06k82K99
-1383E93l62K20l98J83Q0Q1o6o5r6K53j11j10K78p2k0k0j1j1L9l09J38J38q0K69p3p3l0k9
-1386C36j51J97J10k39M5M5K19j30j06j07J34J33j4j4j3j4m0m1K66l17J71j78L31k51j33K16
-1388D55K0K0k09L72k20m6k03L78k11J39j93j8m7J27QPJ57J56n02L13l63K18j02K47r8k72
-1390A33L45ml74M40o0k34M72l43q7Q8J56j92j93J56M8M7k17J33l2k05q7K60J85j64j9L30
-1392E82k48p3J20J21M4M5l4l4p0p1L13k69r9r8J56j8j17K32j60j61J85J0K12l70oJ68K8K8
-1394D16k55R4J64rJ75m06P8P8K0K0J49k01J06k44J01J01J3J4j54J95j43l16N28n3j94J54
-1396D31o4o3J80NK9l20J64J63l78K04K18j31n3n3K08j40l3l4l3l3p2K77k04J46llo9o8PP
-1398B85QPn3n3L5L4N6N5n3n4J81j68K24j24m6m6K16j33o2o3O2O1q6q7J98j52Q1Q1j45j44
-1400A15N1N2k68N45l85M29j15j16K57n57J99J99L9l10R0R0M2M2m5m5J1J2J1J1L1L1k75P4
-1402B15K22j27J63j85q5K65o3o2P9k70K69q1onJ39J40m60j11M56j26M6M6R7k52J74j76jj
-1404C00J1J2J1J2N3N4k74L08j20j19L31k50K8K7qrK8K8j69J81n6n6q5K64k03k03L35j4p1
-1407C46p0N3N3J8J9J8J9n4n4n4n5J55J55m27L88j89J60J03k47L8l10L44k38L60m54K30K29
-1409E36p0p0l4l4j59M23j67j66M6M6j9j9qL40j75j76M3M2J15k34K46l36J66J66m74L39L54
-1411G21k27L2L3j79J71k36J14M9M8k79P0J94j55J83j65RJ0KKq6q5N5N4j20K29k51R8J20k29
-1413A82J75J75j31j30J09k39N46n02J77J77j51j50J5J5J02J02K4K3o4o3p1p1J6J7O1O2P6
-1415D82k73n5K94l02M7L45k37O2O2l06K76p3p3J85j64L3L2o9p0n5N27m09o0r7K53k4k4n0
-1417B57J25K63l19N2j22j84J64M5M5K0K1K24l57L13k68J96j52J26k22j3j2N50k65j88j4L9
-1419C24l10J60J59J08J08L2l17O2j12j1J64J06k43J71mk38J10R6R5Q5q9k10L72Qn73P21l26
-1421D48J97l84n7K92k05k04J55j9J71j77j27M8K96k86K71l11K65q4k3k2J74jk80O8L23k59
-1423B69J92l90q8M91j03P1j06O9J8J9j79M04k55R5m9J25k74j00J39k09l1L17j11K38r0k64
-1425A98Q7K61k84O5J96l86j24K25n2K97jjk89O1l4N48o46J69j29K19ONo1o0P1P1j6j7m9m9
-1428B81P4P5O0k88L00k81P8k70J88J87Q6k64K16j33Q6Q5k78P1K2K2R5k54K27K28j15m63L14
-1430C49l4J39J40j08j07Q8k60J05J05r8r9j46K04K8K9j09K41j02j01J05J06J35k15J93j57
-1431D31j78J71j26j26K75p5l90J90j51J98R2R3NNJ10k39J02J03poj82J68k12J38k70P9L37
-1434E35k45L9L9n1K99j60j59mlJ06k43K1K1J24J23M5l04J18J18j92J57lmk86K95J75j74M5
-1436D32K19l01M8j05j04P4P3n8J17k87K95k25J25J49k5PPk11J38Pj67J59j5j84J64m3m3J9
-1438B65J9K37l45K30j19M1M1M3M3j06O8l80K01O7O7O0k90J54j94M07j74j53J96L9L8m49L66
-1440C72K86n28L05J30l41QL25m90K78p0J07o7l8L11m1m2j12j12R2R1j24j25N7N7K87o3k88
-1442B65N27m77J05k95K87q1q1m4m4J59J60q1q0r8K51k83K99q3k58K99n0k00J50J27k21nn
-1444B43K90k92K03K9l56M58k73r8%%P6P6m8m8m8L01m7m8k79N36j77kl5k09J83j66J06J06
-1446D81j82oJ78j70M7M8m7J28k77L06j91J59j98J51N8N7l24K57j10O5LLj40j39Q2r3L13l6
-1448D23MMq0q0K83o5l10M0J78J78l83J98m2m2O8O7j36j37J57J56j67PP3k76K33N8j35j36
-1450A38L34k48M77l37J83Rj32j31L20k62N4j20j1J63k7k7NOj54J94P1k77L51k31j33K17j02
-1452C30k76N06l09R2R2j85j84K92n8n7K92q9q9n6n6k6J50J71j78o1J14j80J69j19K31k60
-1454B56L21j08O7j76j77L40k43O4O3J42k08R9k51J81J82m80L35j81J68p6R9q1q1N4N3J97
-1456E59j52L0l19O29m17J60j3j58j57L51k30J95K0l10K72j29K20l03M6K38j10p4p5n0K99
-1458E22k1l70J10J10n7n8J46J47k18J32Ql41J17J17J78j72J34k15J40J39j88J62Q0k69n0
-1460B83n1P1P2K89k92J85j64j25K25O7j08J2J3j72j72K10L6j53J95l3l4J08k41J59J58n9
-1462D79o0J63j2l69K12M9l00K49j00L8j37J9J93k5J49K0j54l4J40k89O0K05j44N8j16p3J02
-1464C23J76j73L4L5o6o5n9K91r6r5OON02n44m3m3O1O2Q3Q3k27J22J2J2j37j38K63q7o3o3
-1467A72N77k37q0p9M4l04K09j39K53r5j66J84k10J40k5L23j93J56q8q8J30k20J21J21k43
-1468B63J06l7l7P1P2k62k62M05N7n1l99M79j01J2J3k4k3O0O0q6q5N1N1J02k47Q1Q0k8k9m3
-1471B49m3M4M4J01J02j83J67j32j31J73J74k75P3J17J17l59K22j05j04Q9R0q5K64k70P9k78
-1473A40L04l7l7l71M42P5P6j36j35K5K4R0R0Kl46K71p7N9n21M87r3M5M5M5M5l20K61m3m4
-1475C66k03J45k9k9j15K34j81J69K12j37n3n3MJ79Nl45J33m1K54l29J66j83J63j87J46k8
-1477B63j34M48j36j36K5K4R8k50K30j20N6N5j62J86N4N4j98j97K12L7K01l81P5P5L9L9r3
-1479C64r3N2N2j06j06J7J8J40k10J51k4K51r9K6J99m56J26M2j32J69nl8J36O5k84j06K43
-1481C92j64J85j86J63OPj93j9L23k59N8N8N8k91N1M00k40J09k73P7O0j15J91J6j23j24N8
-1483B25N8Q6q9j36M46l30K51j49K6Q6q9P1k78J19J18R7R7k40k39J97J97o7o6j69M13l75k6
-1485B34R7R8j74J76L0l19N7N7L63k19l9l9O9P0j74j75L05m3j66J84p1p1L04k76p4p3K95k86
-1487A40J50J51k18J31%%J04k45K57l26K98n0K32l49J04J03m56L58k13J36P8P7m9n0J47k02
-1489C08J2J1J86j63L4L3p6p5K4K4q5q4J89j59L7L7J15J15l0l0j72j72L59k23N7N7M3M3l29
-1492H6J9J79J79l39K43j72M10l30K51l66K15j09j08P3P3O7O8n6n6j24K25n8n8K43K43o87
-1494A11L60J13k35J36k13J2J2l2l1J54j95KKk0k1J04J03P8k72J68pJ47J46j74j74m5J29Q1
-1496D39k67R6R7q6K63l01K80j34M0q8k63N07l07N0N0j2j2J35l9M1l08K58Q4k19J31j44K06
-1498D97j7j91K7K7K34j15j78J70K9j46J45k04N8j17K32j17J67j82oj81L00k83J91J5K49l33
-1500B71J84J0j90J59j61J88j94J55M0j34k11J38RRL36k46P5k74K86o3p3p2K36j12J43l1j98
-1502B80k4O1O1j24K26j34j34L82k00j55J93o1o2J68j81Nj70K04j45M1M1%%m1L09j60J5J4
-1504D09j60K15j34r4r4J53J53p2p3J90j60j37K11k63Q6J95j54J56J56k08k07L12l6j82J67
-1506D29JKj22j22j8j9L09k73J14J13m6m6L02k79P0P0l44MP0P0J34J33l97J85K9K8k2k2l4
-1508C19l5j3j3l8L11l00K82j27j27J13J13q9r0klL8L7O7k82K77p2J5J6m7m6K44n69L08m0
-1510B47J56j93N1N1K11l71J26J26LKp2p2K12j37j9k0m0m1J46J46q6m35N94k19P1P1j36j36
-1512B36J26J26p1p1J7J6p6p6O9O9n1n1J46k04M2M2K12l68P1K46j50J99l57qL95j87J01p4
-1514C69j36j36n6K93j3j2R5k55J64j1Q0k69J78J79j13j12L38k44J26k24K4j51K78J04l33
-1516A63M82k20J29l69k0J42l3q8K62k38J11r7P9J62j87J51j98j20K30P3j02K20l61Q2K57
-1518E10k04J46j23k98M32j50l7l8L4L4K26l55k2J53K15j35O6O6k77P3j60J89J35m0k23J25
-1520C42o3K85j17N8l03M6L8L7j37K12QQj26j26K17M3O4k84J98K3j83J65K2K2p7R9k5l74M69
-1523E41j12N1j23N9j16p2K78k93K89l79M36r5r5l34K47O5O6j38j38Q7Q8j80J69j73M09l56
-1524A81K26o6o5o4o4N17k97J28k20p6p5J73J72q9q9L0L1L1L0j35j36J05J04Q1k68N2N2K22
-1527D91j27M1l09K21j29K20j28P3k75K99n0k8k8R5R6k9k8n0n0K16j34Q5Q4l00M9m6L03l31
-1529B31K51M7n34L99N1j10j09J14J15j04K45l1l81K38j12K3K3j07K41m8m8J0J1k84K97J67
-1531E95j83o2o2j8j9J43k05P7P8Q4Q3j13j13L63m51J16J16l39J1K28K28l27K54p4p3L8L8
-1533D13O0O0k51R8o9K80k56R4j17j17L89j94m32O13k90N9J6J6k5k4k10J40qJ66K50l31k59
-1535G1L23J55j93p2p2J21J20j63J2k32J17K98k85J16J16m28L86J43J43l11j37K01j48J03
-1537C84k46P3P4P0O9R9k50J29k19M02m12J58j6P2k78J75%J17K91m21L93k29n5j31M4K40j09
-1539D24O9O8k15k16O9O8P9P9m7J27l09K73L6j38j13K37j14j14N4N4J5J6k1k1K54l27K61l20
-1541B28kL47l11K70j00k75J10J10K8j46q8K61p8R6k13J36J85l97L45k36K23j25q5K64j08
-1543D39k81K16K17j18j18J66j83llmlj95J53J03J03j10j10k3L26k38J10K3l26L08m1j1j2
-1545C85j1j1j1j1O1O2q4q4N1N1j09K40l00K82l50K31n8n9k1k2L3L3p6p7J72j77L98j84K65
-1547F19l17r9K50k94K88j8j8k5k5k5k5N5N5j63J86n11N34MNk51L32q3q3o7o6J15J15m13J69
-1549B44L36k45K93k89k8L22k94N6Q4Q5j36j35j07K43j91J59k13J37N1N2n1n0j32K18o6o6
-1551B77Q8Q9Q1k68L4L5j0rJ38k11L12k69N0N0J3J3J4J3p4p3O1O2k6k5P3P2L7L6n33K81K38
-1554E69l44J12J12J27k23K1K1k3k3J04k44J19J19k03J47n0n0Q3Q3q4q4N2k98K20K19L9L9
-1556E60l25K5K12j36M6M5K09l73K82l00J95J94k20k21k5k6J20J20L3L3J79m03L90j92l16
-1558A06K66M6M5J47m35J11J11K56l26m5m4J00J01l14K68K8K8j06j07M0L9J21J21q3q2poo
-1560C73oL3L4j63J87M0M0j42j42m5m6J00J00N9O0m14J68Q1Q1q6q7P8P7o7o8J94J94l23K7
-1562C37N1N2p3p2p1p0K35j15M04j77l31M84j54j54P1k77K32j17N8N8o8o8K0J9M1M0L24m90
-1564A89P1P2N6N7l12K69n9n8Q7Q8k40L42m8m7j86J63k07J41n4n5K00j49j49K01j8j8MLj3
-1566C30j3j4j3j05j04J87J86n5n6K35l46L26k56N7N7j79J70k7k7O7O6q7q6q8K61k19J30J6
-1568D13J5L8l12L12l8l64K17J84J84j86j87N9N8j38K11m3m4k1k2O7O8q6q5k46J04J98J98
-1570E54L3L2j64J85j93j94MLR7R8r9K51q6q6j88j88M65j16J4J5n3m01K01K01r7r7P7P8l4
-1573C12l3N4N4L7L8j36j37N8N8Q0P9j73J77K63n51J25J26j01j00M1M1j34K15j88J61QQj66
-1575B16J84K4K4l05K77L6L7k24k24N10p2j15j15K3K3N4N4j2j1j15K33j59J91j46j45K48j02
-1577C89l1l0J22k27K10j38J68j82n6K92p8p8j38K10k62L19l51M63j33j33k3k4O4O4j04j03
-1579B10L98j83m9m8j94J55l7l8R3R4j06K43j28j28O3O3j33K15n6n7n6n7K51r8J1J0j46j46
-1581A46J23J23N8k91K75p3kkj11K38k51R8K2K1kJ72k58R2r3Q1O6k82J5J90j8j8J7J7K8K8
-1583D09j06O8j50J99L6j39j54K1K50l32K53r6L39k43q3q3J66J66j14O1j72J77Kj72M9M9K19
-1585F20l62J51J50l47K34r0Q4j23j23M8M8J10k40R0K63j18j18L0K9K9K9j06j07j03M79j92
-1587C65j8R6k54J96j54K18j32LLM7M6M4l05L6L7j3j2R7R6J79m02K30l51L52Lj21K28r3r3
-1590C28j69J80k6J49k33L49k93N7J91j58p0J03k23J26k1j94M05N6l20K9o6o6K72p7J92j57
-1592C64J63m19K47P2O0O0k93N7M1M2m5m6J76j74j01j01R9M48k64Q4j09j09N8N8q0q0j4j5
-1594A79J45k05L92M2O9O8l54ml8l8K24K24m40J42r7r8L6L7N9N8p4K75m5l94K49K49k31k31
-1596A99L06m4j30K18m9m9m9m9K04j46l6l6O1O2q4q4L7L6j60J88j1j1j85J63pqp3p3K19K19
-1598F28l33J5j79J70mnM6M5k96N3J45J46l7l6N1N0j17j16K47j03Pl42O59o21J64J64n7n8
-1600B86K48l34J39k09J83j66k42L39P7P8L0L1k54R6J47J46m13M01l97m9O8O8%J%JM0M0j1
-1602C44j1j43M38r3r3j19j19K45j04j49K01M9M8l4l82K71K72k95N4L9L9j22m71O55j59l02
-1604E9K79r8r9J83J82k97N2k16L66J70j79o1o2Q4Q4n95O83m28J53j65J85J71J70o8o8k64
-1606B21Q5Q2Q2k16J33J93l88K43j05M2M2l2l1l09K73L2L3N2N2k74L06j42j42R8R7j08j08
-1608B11JJK17l64O39m08RRJ03k46M55j28m11J71P6P7r1r1M2M2K46l36L22k59L2L1J03J02
-1611E55J5J5k33k33L04m4j53J95j31j32K81o9J94l88R9R9J9L68o49L98l9l87r6K52j84L98
-1613D54j65J83o3o4p1p1K13j36Q2Q3Ll46M88l27o4K84j73J75J10k39q4q5M25j58l9l9J65
-1615E41m18P4P4L7L7RQl40K41J54j95N9O0j65J84j1j2j07j06J33J34Q7k62K98n2l16L2K87
-1617D65k94J68J68l26K3N6N6P7P8m8m7k6k6j78J71j50j49L93j88K48j01L1L2O1k89P6P7L2
-1619C90L3J89j60k69Q0J39k10L1L0j51J97J98j52Q6Q7q1q1k1k1k1k1N3N3j65J84J3l36M34
-1621E08j46J79m02N5N6K56l26L28k53Q4Q3j49K00j89j89L63k18J79J80j41j40k32L50o4o4
-1623C08K2K1q7q7L05m4j09j09J1J2R8R9m9m9O1O0K36l47K00j50j45K05J5l34L07m3j51J97
-1625D53j5j5K8K9k97N3L07k75K07j42J27k22P0O9r7r7J60J61j01j01M8M7p5p6j01K48j4j4
-1627C65j03K45j6l65J26J25L9l11O5O5J52J52k34J16J16k34O1O1J8J7J57j91j92J57JJm2
-1629C51m3j37K12L7L7k77P2K1K0L2L2J62j86j84J64p5p5K54r5L6L5j27K22j60J4J17J16k03
-1631C72J45j73KnJ69l37J3J47J48o5o5K3K2j05j04Q8Q7M6j30K20l62J91L65k82j07j49K00
-1634C54p2p3J35J35k07J43J15J15o6o7o8o8o8o9O9O9J66j82J29m6n7n7j20j20K21K21k80
-1636B52O9N7j16J35J36j37j37Q6Q7q1q0k46L36n3J22k44L38k99N1K06l77K38O4k45J03J00
-1638C65J00r4r4k9k8K46j04k23L59j34M0k61L20r6r5L76m37K31j17j90J59K58r2Q2k66K64
-1640E40l18K71p7l3l2n4n4R3R3k27J22j02K48j4j4r0r0J71J72k48k48K06L2J85j64l17K65
-1642C16R4q0j64J85J91j57k59R0j03K47O1j14J90j58J47k8j93J56j61J89j63j63K01j48O1
-1644B37O1L66k15j77j77J65J65KJq6q6L3L4J1J1O4k85N7N7J04J04j21j22J94j56K73p6k38
-1646B00L44r2r2q3q4NMJ08J09j%J25k24J18J17p6p6p7p6J8J8j63M18p8p9m1m2j8j9pJ67k64
-1648A59Q6M08j73l40K41l5l4J15J16j83j82l8L12k04J44k15J34p0K79l42Oj75M06q0q0M3
-1650B98M3M2M1m6m6j6j6j6j6K6K5r8r8pL42k1k2k69L13p9q0j68J81P2P2q4q4j35K14o3o4
-1652B41p0K78j99J49J49j99J47k02L36j3l35J4q0K69j36j35J11J12k11J39l69M43l8l8j84
-1654A79J66K3K4J91l91L26k56L5L5k0j9KKr3K56q6q6N0N0l7l7OOj40K10K58l23j1j0J59m22
-1657D7J67J67J9K0l2l1l45K36K29j20P5k75K20j29K19j30j29K19j61J89L04n09k09L73j15
-1659B99K35j42j41O2O2k96K86k0j9q3K66r8r7J76j73q6K63j3j3L0L1j98J50o7o8J97j53J89
-1661E79l93L05k76J74j75M02j80p8p9J12J13j50j50J98J97j80j81K7K7MNJ16k33N0N0J14
-1663C98J13k65Q4j83J67rqonj14K34k9k8Q0Q0j30j30L43k38p2p1R5R6P8P9m74J07L30k0m12
-1665I0M02J83j66o3o4o2o2J85j64K60l21K31j18l82M30k09J40k89K93j21K27l4l4l5l4K99
-1667E82m9l04K77l08M1l1l2M0M0K36j13l9l8j04M78o93N85j85j85Q4Q5j56M26j31j32N1N0
-1669D75p5p5J2J2j0j1J2J1r2K56q5q5K5K5k15L66k22k22J70J70M1l08L61k20NNJ28k21L10
-1671E43k72L3L3llllmmJ7J8q0K69k34J16k62L20j10j09K41l40RQn4K95m7m6J18J19j65j65
-1674B35K49j00j29j29K46j04K8K7p0K79ml54j35M46j86J63j06j06Q3Q3j51J97m9n0k54L27
-1676D36J%MMMMj28j28J34J34o4o5K78p2m6m5k50L33j08j07k32J18M11m04K22K22k11k11L42
-1678E76k40j61J88M2M3o4o5p9K70J37k11OPq3q2p6K74O5O5k54R4p3p3J45k04kjK82l00K34
-1680D60j14m2m1k4k3J01J00j86L95k96N3O2k88j1L38l90M26j2j1n2n1n2n2P4P4p2p2O3O2
-1682D19j12K37k39J10J54j96o2K88k94N5J51j98J51j98n0L00j23j22R0R0r1r2K67l14L18
-1684E39k64J47k02m2m2P4P3J82J83l21K8Q6Q6l79M35m59j11N01q1O4O5k15k15M6L96l26K4
-1686B72L0L0J28k21J35k14K60l21P1P2l0l0R4R4J05k45K14j35J76j72J26J25l23K58J13m69
-1688A43R2R1P7P7k32J16j30K18q8q8J08k41L30j9j28j28J98j51j51J98O5O5j17j16J46J47
-1690D82n7n7L7L8n0n0Q0P9j24j25R4R4n1n2Q1Q1k02k03L56Ol27K53l8l9J95j55J2J2J22k28
-1693B64q9K60M1M1q4q3LLo1o0O2O3J12k37J56j94N2N2J61j88j17K32j68j68N32m8k02J47
-1695D82J93j56k79O9M5M4j29K19k3k2k41L41j76j76J44J44J36m45L40qj08j08J61j88M06
-1697F65m07K8K8j5j5N1N0Q9k61J40J39j5j6k92K90K14l69J05J04k53R5K2K3J04k44J19J18
-1699D97k27J21R9k50K02j48K23j26J6J7j15K35j49j49K15j35r0r1L61k21j4j4R5R5j19j19
-1701B09Q4Q4N6N5j12j12J68j82J24k25Q1Q0J68j82j09j10J89J88k0k1j08j07N5N6N6N6M8
-1703D69M9k35J14J2J1j63J87p2p2J46k03l4l4R0R0o5o4Q0Q1o4o3Q2Q1KKk38L43j27j28J92
-1705D69j56L0L0RRo1o0n3K95j24j24j31K18j02K47k11J38p1p0L8L8J3J2l8l8L82m33MLJ63
-1707D26j86M6M6j93L88m1l90M71j10k41J07j50J99J6l32K11K10k48L34l45K35j27K21l34
-1709B13K49j67J83n9n9l7l7l8l7K9K8J15k33J08J08k5k4J1J2k94K88j7j8r7K51k86O3j4j4
-1711B02J82j66K70q0j4j4J77j72j21j21J71J71l3l2J8J8r0r1k48L33J38k12k1L28l12L8J41
-1713D60k07J1J1J18J18k59Q9o3K87j50j50j0j0J87j63m3m3L50k32k5k5K23j27PQj5j4m6m5
-1716B42K82l00R5R6k68L13o8o8J14J14k66k65K08K07l56K26M3M4p9p9K63q6j04j05J00R9
-1718D02k44J04J92J92l49jl0l0K06l75J77J77j30K18k39J10k12J37J59j90J19J19l76K06
-1719C42RRM4M5j1j2o2o2l02K79M0M0K1K2o6o5R2R3NNk9l0pqj75J73j11j10J08J07j97L84
-1722E71l15L5K0K0L1L0n6n6M8M8j48K01n0m9k9k8J4J4r5r6M23P4j66j67K9K8q0K68j31j32
-1724B56k2k2R7R8J0J0KJL8L7l95J86L32k51p5p6L03k79L1L1nnQ0Q1l13K70j65J85l69K14
-1726B85j19K29p5p6K7K6O2O3k65L18j1j0j07j07J6J6J80j69K7K7J9J9j99L82l64j6K25j25
-1729B78K9K9o5K83m12J69L8l11L39j0l9l9M1M1J9J9P1k77K60q9o6o7o0K90k27J22l0l1o8
-1731B37K80k58R2j30j30K33K34k54R6l6l5m85N59k8k8J0J0L2L2j67J83j23j22L02m6k28J21
-1733C51j77J72K0J9k11J38K25j25l7l8J88j62K41l42l6l6Q4Q4llk3k4O4k85L79K9K3l27Q4
-1735B72Q4J13k36J11J11k75P5J29k20K81o7o4o4N9N9P1P0p5p5j6j6k56L26K7K8kjk02J48
-1737C95O0k89J13J12R1R1j57j57K5K4k11L70M3M2j12j13j42K08J38m44L42k40r5K55j54J96
-1739C91k00J49k6k6P6P6k65Q3J87J87k71P8P6k74N3N4j87J63j2j2j39K10L5L5j61J88qqr7
-1741C55r7P8k71K61q8J09J08k72P8K22j26p7p8L01m8k8k9j37K12j63J86Nl45N0N0J37J37
-1744E30k54R5N9k90L46k35K52l30J63J63k95N4J30k18J08J09p3K76l21K9nmr2K57j30j30
-1746A94K85k97K39j09N1N0n1n1n1n2J42J41k36J12j53J96j5j4J78m03J49J49k07J42J78j70
-1748C97l62K21P5P5j9j9KKj79J69O0O0j85j86J35J35n9n8K03j46J71j79r1r1K38K38j40j39
-1750C28l5l4l5l4N6N7N6N7k9k9k9k9O3O4j19j18m2L07r3r3jjK0K1j94J55m1m1R7R7L1L1k50
-1752A93R9M7M8L4L4j33j33J98j52M5M5MLMLp3p2J30J31NNj19j18L32k50J87j63q9r0R2R2
-1755C39J8J8p0K79k87O2O1k87K05j43O7O7l12K71k1k0j81M01l5l5Q1k68K93n7p9K70l48K
-1757B91O2O2l31K51O2O2j1j1Q7k61r5K55j42K08j02j02K7K01J6l33j37M45n0m9RRj73j73
-1759G7L38k43K07K07l29K53k71P8j1j1r8r9K18j32J84j64o7J08P6P5r6r6rqJ29J29p4p4j
-1761B96jo6o7r5K53L33m80n1K98P3j02o0J15k13J37J43k06K4J97k71P8P8r7KJN3j22K98k84
-1763B64n4J19j11O3J72j77M7M6j60J88j15O0P1k78K61q7l7l6L31k50J86j63N0N0j39j39K42
-1765D04j06R0Q9q6q6Q0Q1k49J00k8J48k31J18m2J32l48K32j92J57KKK3K4p0p1N11l03k44
-1767A37L39J78j71k03J47r4r4J79j70k5L24j53j53N1N1J65j84l8l8K41n71K84K85j53J97
-1769E31j97J53n3n3l1l1j22j22J77J76j80M01k24k24L96j86j85L96k33k33K04j45K7K8R2
-1771C62R3l7l7k19L62r2r1j79M02j73j73J47k02O3O3J07J06o3m13L58RO3O4j40j40K63l19
-1773A84J17J18j01K49j30j29l7L12m01n1N7N8J88j60Q4Q4J85l96L3L3J06k43j9j9J05J05
-1775C32JKk1k1J58j92J13J14k59Q9R8R7j20j20M7M7j94J54K4K3J19k30l4l4J44J44m67J15
-1777A29L07m2j80J69p1p1O0O0q2K68k02k7J7J7J36k12m1m0J11J12l7l7O1O1l07j33M81j00
-1780D07P2k77p3K76K20n95O19L8j64j64r5K54j80nJ41l4l71K12m0J35j04P1l8l9J62j88J84
-1782D24j66K83o5k70r4N2K27j73j73K45j03L10k71K73p7p7K73m20J62L1L1n7n8o9K80j70
-1784C48ML21k61M6l03n9K89j26l00N88Ql83J99j97k3J95j54L92j90p9R5l9l9NOOOp1p0J25
-1786C39J26k49J00j18j19K71p8N2j21JJ76j07K42k29J19n4n5N9N8k25J24P1P1q1q2j05j05
-1788H1J86J86p6p6J1J1j6j5N0M9J10k39k8L20l54K27j66J84k77P3P3P2q1q0K90n9m8m8Q3
-1790D43Q2M5l04M01m14k58N55j28j28P5P5j87J62k69Q1Q0Q0j1j1j1j1j41j42L45ml7l7n9
-1792B72n8J52J52j97J52j97J53k19J31M3M4j09j10J0J0K07j43opJ47k03K63q7k0k1N5k93
-1794A21P7P7L2L2n5n5J12J12l24K58J27k21J86j64K41j09Q7k61poN9N8l4l3l4l4J71J72l30
-1797B55K51n9n9m5m5K17j33q2q1N3N3N3N3j15j15M89l26%%k9l0q2K67k36L47k79P1r0r0J2
-1799B25J1K87k94L90m25M54l59L9L8j2j2j14j14J26J26O8k80K79p0j75J73J23J23l09L9M7
-1801C84M7p3p3K54l27M2M1OOk4k3J00J00K0l30J51J51k06J44J51m31j4L35m3m3R6R5j30j30
-1803B76J62j86R7k52K63q6J75j74J82j68PPm3m2J54j95J08J08j10K38j52j52R6R5k11J38
-1805C35J02k47L11k70L4L5M8M8j27K22k90N8Q8Q8L8L9k45J04o3o4J0RL50k32lkN5j19J75
-1807D87j74N2N2j67J83%JP4k76J00J01nj80K97k85n6n6R3R3OOJ3J4KKN0j25J48k01J22k27
-1810A44K14L8k54R5R1R1j49j49J49J49k08L72k08l5J11o3j00r9J15J15j90J59J64j85j52
-1812B15K3M6M5N7N6j00r9J14J15j58J7P8k71L40k41K82o7j61J88M3l07r9K50J1J0R6k52J01
-1814C32J00q6Q7M8l01N19k95j60J4J21J21j48K7j20K30k95K88Qj67q4K66m7m8k5k6k9k9N8
-1816C59N8m9m8m9m9J22J22q1q2J5J4j82J68m2m2K63q5r2r1nmn3K96m6m6J2J2L3L4l08M1K08
-1818D03j40L15k67L9L8M5M4l78M37l87J95q1q1J18J19L1L2j65j64J55J55j10j10R4R4j01
-1820C30j00J04J03j13j13J13J12k27J21p5p4J21J22kkj88J61J61j88o1o1O3O3p5p5K52l30
-1822A42J21J21j19j19M9M9M9M8m0m0M7M7N9N9k24J25J5J6k8k8j99J50M1M1l4l3l4l3l8l8
-1825A72J08J08M0M1l09K73J10k39ooK6K7P7k72J06J06lll4l4J62j87J36J36q9r0MLLLN2N2
-1827D73j55J93r0k64k1L28j16j16K36j13R3q2r2K56k39J09o5o5L9L9m9m8J09J09l7l6nor2
-1829B93r3O0O0O0O0j06j05R8R8l6l7O2O2k02k7j29K20L9j35P1j02R0q5L30k52N7N8o7o6j
-1832B75jQ6Q6j4j3j4j4k5k4J93j55k28J20J97j51m0J36k90K91j95J53J03J02l01M8N6N5k0
-1834D16j9m2m1J49k00j74M08j74Jj69J79K7K6k78L03l5l5J3J3j48K8K01j47J94K0k81O7j73
-1836A29J76J98j51m0m1K65l18k2k3K47j03k46J03J46J47j08j09K56r4k83O5J68J67j66j65
-1838A98R6R7K0K0kkJ64j86l31J9J78J78l10K73j60J89j31K18k88K94k08J41j09j10N8N7Q4
-1840D47Q4k22J28l40K42o4o3J12J11k88O1J60J59j39j39j5j4J60j89K96n3k3k4q9r0N6N6
-1842C20R2R2l1l1k26J23P2P3j20j21K5K5N3N2l5l5r3r3K49j00o3o3Q2Q3j03K46k34J15K0
-1844C74K0K01l80K11j39K2K1P2P2p4p4J4J3J3J4l7l6j46K04k0k0JKK7K8ONO8k82L51k30K32
-1846E33l50N0N0m9K99P4k75J73j76j97J51qqL5L5q7K63k76P4J7J7L9L8%%%%k8k7k8k7O1O1
-1849D34k22J26l3l3N3N4J48k01onk1k2J%j50J98K4K4k21J27j7j8K88k93J1J2J83j66N2N2
-1851C79k26J22J4J4P4P3M5l04K64q4KLj9j9m1m1J86j63N5N5q7K62m06J74N5N4LLK2K1j45
-1854C45j46J42k06K36j12K28l54K72p8J36k12J36k12K16j32rrk33L48j74J74J4J4J45k04
-1856C25KKp1p1M09m06J62j88O4O4j76J73J68j82K12j38J54j95k0k1P0P1j11j12K74l07J86
-1858C38J87k22J27p0o9O2O2lmk81O8J91j58K61q8j75J74q6K63l62K19k34J15q2q1L65k16
-1860C01j07K42O8k82J69j79L49m65K54r4O5O4k18J30j52J97K3K3K9K9j16j16J58J58j61j62
-1862B07Q5Q5q3q2L24k4l2l1j14j15p0K78l22K61m6m5J6J7j80J69P0P1j11j11N6N7n3K96j89
-1864C84j89R4R4N9N9k68L13j92j92l2L17n4n4J65j85n2n2K10j40q2q2R2R3k71N43l08K74
-1866E44l00M8m6m7L19k9j54j53P2P1k18L62l24K57l3l4Q7Q7j17j16J47J46k53R6K4K4j00
-1868C60j00L5L5j7j6L77m37M3M3j23K27j16j15K4K3K4K3ONNOO2O2q3q4M8M8o2o1J60j88K04
-1870D18j45M3M2o6o7J16J16k63Q7K97k84J16k34J08J08jkr5r6J08J07j10j11J51J51m9m9
-1872C96m9m9K9K9K9K9j60j60M29j53N0N0n2n2j89J61l5l6M7M6m0m1p2p1k8L21J63j86l4l3
-1875C39j34K16j77J72j87j86L07k74J53J53j08j09K35j15noMMj9j8J75j75J30k18M9M9K7
-1877B82K7ppJ89j60m7m7j12M69k80O9k22J27L07m2q6q6n4n4J42k07M7M8o2K88k41J09J09
-1879D99k40J69j80J03k46M7M7J13J12j6j7R3k57OOl7l8K59r1J9J9j05j05R9R8POJ15k34L2
-1881B83L2J0J1NMNNj0j1j0j1m3m4O6O6k53R6J61J61p8p9Q9Q8k77P1j6j6k37J11J19J18j27
-1884B89j27K87k94J45J46j75J75p1p0L8L8o5o6N9N8k72L10k35J13J39k09K26j23j55J93O3
-1886D17O3k1k1k39L43k41J09n1n1o7o7J00R9j59J90k90N9J63J62p7p8j3j3j4j3N8N7j24j24
-1888A57K60l22j24K23K88o2MMl78M36l49K32%%L6L6j30j29L79k02P5k73L2L2N9N8k04J46
-1890B84N1M00m80J02n2n2j40M43p6p6j48j49K78p0j08K42J46m36K54r4J0RJ12J11l19K62
-1892E04m3m3k41J08j39K09m2m3j30K18o2o3O8O8L33k48J3J4k69Q1L0L0l6l6j44K04p6p7L3
-1894B21L2O5O6k2k2m9m9K34j14lmm7m7J08k42L55Ol5l6l6l6j38K10J4J4k8k8k8k8n7n7Q8
-1897C07Q8r6r5Q6Q6J85j63j35j35K37j13Q3Q4l8l8l8l7L4L5N7N7k13J36o0o0k9k9k2L28m2
-1899D60m2k0k0j3j3P5P5o4o4k60Q8K9K9N1N0QPj89J60nnonJ29k21J22J21j21j20J41J41j73
-1901C45j74K99k83N2N2J24J25l27K3p2K77M9k99J15k33J26J26m1m1J57J57l02M8R3R2l1l2
-1903D25n3n3L4L4m1m2M6M6j4j4j4j4R4R3j68j68J01J02J3J4k0k0k1k0q6q5N9O0Q6Q5l72M42
-1906E29j89j88K40j09k42L40r7r6Q5Q5o0o0J41J40j42j43K00j48j48K01j10j11K54r6OPj6
-1908B73j5Q4Q5j19j19J32J32J03k46J60j89j4j4LMP0O9J18k31n7n6K25j23N0N1J45k05J3
-1910C29J4j66J82j4j3N6N7j76J73l44M69j12j13q3q4K00j49j4j5J09J09l4l5j43K06j19j18
-1912A72Q6Q6J31k18K9K9K64l18K05j43p6p6M8M8M4M5j74J75Q0k68J53J54p1p0j79J69j04
-1914B21j04J21J21o1o0Q4Q5M6M6j35j36j16K34n1n0M6M6M5M6m9m9m9m8J11J11j73j72L00
-1916D10m9K86n29J19J19j28K22j05j04J43J43k58R2MMj14K35j94J56l77M38j95J54j19j18
-1918B35j0rL9M0L9M0j04j04J80j70Q7Q6k3k3NNM0M1l03K79L8l10K31j17L5L5K34j15q5q6
-1921B30J87j62j40K09j50J98o3o3N6N7J66j83mlk5k5O2O2llk03J46n0n0l7l7J08J08n8n8
-1923B72N2N1j90J58N0M9k0k1k1k0klkkj04j03K97n3l0l1n2n2J70J70r1r2l9l8J57j91PQJ45
-1925D29k03K82l00m6m5L62m53K90o0N3N2Q2k67N9O0L7L7p5p5K30l52K31j19J65J65l71K11
-1927C79K8K9j27j28J13J13P2k76J45J45k04J45j17j17PL56l21K9K55r4N9N8k63Q6j10j10
-1929A52N3N3J26k23L24k57J57j92P1P1r6r6J44J44kjq1q0O5O5n4n3L4L4K0K1M2M2j49K00
-1932E34j92J57j00r9p8p8J11J11Q2k66K39j09m4m4K07j42l3l3J46J46j96J53j27j26K15j34
-1934C00K57r2j42j43K42j06J63j86n4K95k06k06K48j01QQK9K8n9K90l06M3K83k99m5m5O4
-1936B68O4LMMMOOJ16k34K19K18l77k8K1K1m5m4Q5Q5o1o1j1j1J86j64Q2Q1j22j22n2K97j04
-1938C34j03K0K1K0K1kjK0K0j98J52J51j98K6K6K5K6j70J78j8j8J1J0j86J63N7N8k63Q7P6
-1940C45P5R0k58L3L4J2J2P4P4r3r4J36k14R2R2k22J27K58l24j3j3J47k02O3O2J9J9J53j95
-1943B89q7K63k68Q1N2N2J0J0J0J0j58j58K63q6r1K58k44J05J7J7k6k6j08K41m3m2rrrrQP
-1945C20k10J38J36k13K02j48M0M0J8J8o7o6n9K89j02j03O4O5k6k5J92j56j47K01j6j7K2K2
-1947D12M4M3k03J45k47J02M3M2j31K17r6r5L6L5j87J62N3N3o3o4J33k16N6N5L4L4p0o9j21
-1949A37K28j1j1J1J1o7o7K16j33R5R5j67j66n3K97j03j03Q4Q4k22L61k71P9O4O4j26j25K17
-1952D18j32J3J3l1l0J96j53K1K2K56r3k38J10LKKKJ33k16k0k0O6O5j16j16k9L20j78mM7M6
-1954C59N7N8o3o2p4p3J24n0J46k02R0q5J01J01k98N1R8p6L4L5K3K4K2K1J31k18O5O6r1r1
-1956B23n8J17j55J93j97J52M2M3J11k39J55k0p0J06j13O2N9j15r3K55k49R9p5p5Q7Q6n9n9
-1958B13M0L9L9M0L5L6k48J01j0rQ8Q8l8k14K85o4l9l9n3K95k28k29J36J35k16J34j14K35
-1961D38n6n5j2j2j66J82J06o8j94J56J22k26J93j55L0K04k32J17J28k22O3O2J9J9J6l33J25
-1963B49J25n0m9m9n0P5P6j2j2M2M3m5m5j0j0L17k65j5j6R4R3j36j37K05j43p2p1J69J69k3
-1965D47k3j32j32K81o8M1M0o7o8o8o7M9M8l8l9M7M6O9O8k90N9J47J46k94N6O2O3J7J7j57
-1967B60J92k55R3j67J81K65l17j64J85O9O9n5n4NOK02j47k0k0J54j94M6M5K4K4l0l0qqj22
-1969B29K27j66J83j66j66Q1Q1K92k89L7L8p6p6P0P0K6K6M8M8l08M0J06J07j4j4j01j01N6
-1972B88N5N6N6n1n2n1n1M7M6Q4Q3l28K54L6L6k97N2K2K3j95J54M4M5o7o7P9P9KLj73J77k05
-1974A84J45n3n2K15j34k5k5O2O2j34K14q5q5K3K4K5K4o3o3llJ9J9j69J80P1P0n8n8q0q0K24
-1976C91j24N1N0J52j97j%qqJ89j61J9K0J06k42O1O1O1O1k50R9K31l52M0M1l2l2L38k43r0
-1979B31K59k37J12k59R1J24J25k75P4J76j73M5M4L8L8k46J03%%K2K2o8o7K16j32k4k4R9J00
-1981D14r9r8l4l3J83j67L0K9J83J82k76P4m1m2LKj17K31n2n2MNMNj9k0j39K10J0j65J3J87
-1983D15j28M6O7j07j12O1Q7q7j58M23k35J15j71J78MMk1k2k1k2n4n4K51r7j16K33l23K59
-1986D15K5j50R4k54K16K15l22K7Q9Q9l5l4j7j6j7j6L7L7L7L7j3j4j88J60j77J72j02P4N7
-1988D26N7k63Q6p3J02j93J56J60j90r1Q4K20j29j03j03L15k67K79p1k71P7J14o0n0J25J47
-1990D84k02j21K28j86J63K1K1j03j02O2O3O3O3q5q4j5J59J46m36K22j27J98j50J00p4J79
-1992D87j70k03L79k61Q8j70MJ69J68klk73P5j93J56J91j58k7k7K5K6j70J78L8L9k7k7q7q7
-1994A38K91n8J34k16M7M6J1J0j86J63l7l7n1n2L02k81J56J56l09M0j1j1K9K9QPJ10k38J76
-1996C66j73j0L39l00M9k25L56n7n8J10k40J02J03j14j15J85J84M5l03K13j35J43k05P8P8
-1998D16k11J38n8n8Q2Q3o3o3K8K7N0N0k38J12Q2Q2j74J75m3m3J36k14j8j7J02J03j01j02
-2000B63jjj10K39k9k8k03J46O2O2o2o1K5K6LMR2k58K22j26jkJ74j76klk4k4R6R6K27j23k52
-2003B51R7j14K35j47j47J44J44m60N86l44NL6L6j39K10jko6o7MMR1R1K7K7j19j19J3J2P8
-2005C66P7J4l36K60q8M9N0j91J59J28k22k5k4J40k08L15k67J10J09p2p2Q8Q8j16j16P6P5
-2007C67j20K28q1q0n9n9j9j9J26J27j06j06J77j72N6N6L5L4l9l8o1o0K59r0P8k72K14j36
-2009B40M0L9K5K5j1j1K99k82m2m2L3L3L3L3j02j01PPj23K25j89J60K20j29KKj7j6j25K23
-2011D56o7o7M1M2j02j02K40j10kkm6m6K84o5n1n1j42K08J1J1j26j25N7N6J22k27J14J15k7
-2014C99k6k7k7o3o3J04J05j81J69k25J25klK16j33m0m0Q3Q4o9p0lmJ71j79J8J8KKK3K4j50
-2016B38K00k15J34J88j60l0l0r7r8L17k65J02J03n8n7q7K63p9p9P6P5p0o9RRRQK8K7j69J79
-2019D02l8l9j26K23j%M3M3k49R9r7r7J56J56k22J27k05J45l0l0L7L7p1p2K85o4p1p1O5O5
-2021D00k2k2k5k5k6k5j4j4P3P2j9j9m1m0J24k24R5R5J71j78K58l23J8J8K15j35k59L22J0
-2023D60J0l90J91O8O8r6r5J66j83K15j34J9J9J34k16K65q4o5o4k1k1K04j45l5l6N0M9j46
-2025A87K02J4J4n2n1k4k5J73j77L1L1M6M6k82L01onj89J59l7l7K1K1K2K1j9j9j9j8p4p3N0
-2028B32N1J25k23O0O1j1j0j1j1J08J08l65K16K1K0n2n3J76j73K4K3lmr1K58k45J05M0L9k12
-2030B03J38N0N1j72J78j05j06N6N6l1l1J9K0j7j7K13l67M6M7M2M2m5m6N9N8k9k9J3J2J3J2
-2032C33rrJ65j84J42k07P7P6j85J64l3l2o1o0K23j27M3M3j75J74qrL5L6j92J57o2o1J01k47
-2035A08J52J52l4l3l4l3N4N5l3l3noonJ5J5J5J4k3k3k3k4j0j0P7P7q7q6J75j74K28j20N4
-2037C89N3k6k6k6k6q5q5O1O1nnnmK0K0K38l43K95n4r8r8mlK36l45J38J38j82J68r4r3J6J6
-2040B42M5M5m2m2R9J00m6m6j37j37L94j87%JP4P3j95J53K19l62j03K46r6r6K80o8n4n4j41
-2042A65K07j84J64n8n8J39k10L32j7k42J07j00j01K05K05k43J06r0r0M0M1o9o8J88j61K32
-2044D40j17k1k0m3m2L5L5N7N7j78J72k5k5l5l5L0L0J78j72j71J78MMK6K7m9m8J48k01O8O9
-2046C76P5k73J67j83J89j61Q5Q5J86l95N2N2J6J6n7n6L1L1k7k7R7R6J34k16J41k07K53l28
-2048A52O5O5RRJ0RkjJ94j54%%j31K17j20j20J05J05l2l2j0j0j50J99KLJ7J8j79J70k1k0K3
-2051C90K2k23J25J6J6noonl8l9K45j03k4k4m6m5j7j6M9M9J17k33K91k91L8L7K3K3j30K19
-2053D09o5o4M9M9l8l8RRJ18J18l04M4J6J5k17J32K2K3Q8Q8j95J53o1o1l9l9L5L4j61J88J3
-2056C30J3n3n2Q2Q2k02J47n4n5N5N4MLLLk2k2J74j75P9P8k85O4K7K8M9N0k9l0j16K32k14
-2058B48J34m0m0N4N5o9o9K63l18K05j43RJ0j2j3qrP9P8q5q4L8L9J46k03poO0O1N3k96J32
-2060B62J31l6l5O8O9m1m1k51L30q4q4QRj01j00L21k8l5l5M8M7l9m0K8K7j69J81j24j25M3
-2063B04M4K8K9K8K9mmr0r1Q0Q0K9K9l07K75n3n3P7P6j1j1n1n1J4J4R5k55J67J67k53R6j51
-2065A76J98l5l5P4P4j37j38p2K77MMj71J79l1l2rj0M9M8l8l9l1l2o0K88k30J20n5n5j8j8
-2067B45O9P0m5m5J51j98N4N4J0J0J34k15LLj47K02j6j6J29k20k3k4K2K1K2K2J2J3L4L4j15
-2070B50K35j08j07mmQ3Q4n4n3L4L4p5p6P1P0j19j18J43J44j22j22K78p2j12j12K07j41J17
-2072C51J16j08j09J06J06j77J72q3q3J35k13L4L4J3J2L1L0j14j15J70J71l46MR9J00L4L5
-2074D05l6l6j4j4j23K26n8n7qqpqRRj01K49r3r3K12j36K1K1%%J5J5k25L57j72j72K06j43
-2076B41Q0Q1k8k9o3o3K5K4K2K1M4M3j42K07p7p6L6L6j60J89j32j33R3R2N6N6l1l2j3j3RQ
-2079C71k03J45J24k25K24j25j48K02N2N2k69Q1k9k8poJ1J2o1K88l18K64j39L5K7K7j37K12
-2081D32k41J08J20n6k4k4l5l5J06J07r7r7noj6j7R5q0q1K69j44L0J2J87j88j4Q5r0N8N9r8
-2083C20r8L8L8J48k02L7L7J5J5L0K9k75L06k85O5K10j39j37K12oj81J85J0j24N0j68J82P2
-2086C84j03J53j97k1k2J25m9J58j91L9L9J8J8P3P4j87j88J30J30p3p3P4P4j4j3MNK6K7k36
-2088A84J14J02p2K8K7j91J58P6r8p6R8J9J8J9J9O6j08j85J64j80J69j04P0O0O0p5p5j5j5
-2090B57P3P2n6n7RRK03j45j45K04p5p4L5L4k6k6Q4Q3j88J61l5l5j15j16Q8Q8K7K6K6K6p7
-2092C35p7j28K21RQj66J83m4m4k2k3noJ90j58N0N0o0n9J2J1J2J1qrl1l0J87j62L5L5jkjk
-2095C11m9m9R7R7o9o9l9L09k32J16n8n7L1L2k0j9L17m98K7K6J78j72M7M7j16K32p3p3J60
-2097D34j89K9K9j21K27L1L1l1l1l1l1K2K2K1K2r9r9K42j06j9j9J55j94Q6Q5J2J3l85J96m4
-2100B58L05k68Q0opMMj92J57pqJ4J4M0M0j06j06J09J09p3p3p8K70l40K42K9L0k61L21q0p9
-2102C42m3m3NOP0P1J16k33l6l7K3K4K3K4L9M0J13k37j22K28RJ0J8J8m7m7j10K38j03j04L9
-2104B94L8Q9k59J72J71j11j12K7K6K6K7n8n7J38k10J48J48l47K35k4k4L4L4j93J56m0m1L2
-2106C19L2j65J85n6n5N3N4p6p5L3L4j14K35m9m8j6j5l8l7K24j25J81j68RJ0j3j2K6K6o1o2
-2109B36O1O1k6k7L0L0N2N2l09M0M8M8N5N4l2l2llllJ4J3J4J3j3j3j3j3l9l9J07J07p4p3J3
-2112C33J4JJQ8k61K16j32j77J73J73j76NNK42l40R7R6j15K35k45J03j6j6K03j47kjk3k3P2
-2114C83P2p3p3l5l5L0L1J37k12P2P2k4k5k4k5R2R1k50R8K8K8l8l7M5M5m2m2M5M5m2m2K9L0
-2116C54n7n8Q6Q6jjpopop4p4K68q1m5m5K1K0o9o9J93j55J93j55J9J9LKLLj5j4PPj31K18o5
-2119C67o5n1n1J16J16j98J51o7o8J42k08N4N4J19k29J12J12k8k8k8k8J8J7J7J8l0l0l0k9
-2121B45J24J25k17J32qpJ4J4j1j1j1j1o3o3K4K5J1J2J1J2l6l6J61j89L9L8J7J7J2J2p4p5
-2124B33J0J0J1J0N1N0N0N0p3p4J4J4j8j9K58n56M43j38N0N1j03j03J00J01j24j23K19j31
-2126B63O0N9j36K12k37J12o2o2llK16j34j18K32j83J66pqp3p4M1M2M1M1m0m0o2o2K65q3J05
-2128D68k44J39J38q7q6RRJ0RJ4J3r6r6J92j58L9L9M7M6r8r9M0M0L9M0k1k1j51J97J32k17
-2131B86K3K3q7K62j96j95J53J53n0n0llllK0K1K0K1k7k6k7k7l9l9M8M8rrm5m5L60k22K15
-2133E48j34o3o2j35K14J2J2j41K09j34K15l74K08m6m7P7P7p1p2J25k25R2R2l8l9K11j38j38
-2135B35K12j27j27R8R9l8l8j6j6r8K51k28J20N0N0j90J59j90J59j6j5K0K0kkQ0k69J52J53
-2138D86k30J20p8p7R4R4k12J38J69j81j58J90j6j7K7K7j56J94J06k43O0O1p0p1J32k18J46
-2140C17J46k10J39n8n7nnnmJ7J7J7J7k4k5k4k4qqJ16J15k90K91j5j4j64J86j1j1p8p8K06
-2142D66j44M4M4m4m3q8K62k77P3j0rJ2J3M9M9l9l8J6J6onJ38k11R4R4k09J40p8p9J73j76
-2144B27K17j32NOl8l7J86j62J2J2K37j12o0o1k8k9N9N9j6j6J81j68k3k2M3M3PPm4m4k12L70
-2147D67j54J96n6n5p0p0K25l56J38J38j98J51m5m6M6M5j51J98o9o9J8J9J94j54M2M2m0m0
-2149C46m0m0J8J8K15j34n5n4J20k29O0N9L8L8mmmlm4m3Q0Q0O2k87N5N5qqqpQ3Q3o2o3j2j2
-2152B89J84j65M6M6P5k74L3L3J1J1N1N1j4j5j69J79l9l9R2k57Q5Q5M1M2j04K45m17L98j47
-2154C57j48J98j51O7O7j57J92k00J49m1m2J77j72J9J9llL1L1n6n7j0j1P6P7r5r5K9K8K25
-2156E01j24j5j5o9o8M0M1j07K42r9j00K9K9PPJ77j73J11J10j44j44J76j74K09j41L4L4j0
-2158C64rj0j0J2J2j85J65k4k3kkppppO4O5m5m4J79j70K6K7m4m5J53j97R8R7o9p0K1K2o6o6
-2161A96K5K4J13J12n9n9PPQ3k66K94n5k01J49J8J8k2k2k2k2k5k5J71j78R4R5r4r4K13j37
-2163C38k7k7j9k0J25J26j40j40J79J80j62j62M2M1p1p2N2N2J84j64J41k08K8K8K7K8j68J80
-2165C71j5j6j5j5P3P3n7n6n7n6K0K0K1K0O6O6q0q0N2N2j44K04n2n2l0l0OOK02j46l3l2R1
-2168C77R2m4m4m4m4L1L0L1L0l7l8j6j6j32K17o7o6M4M5m3m2O6O7k17J32J6J6n0m9J10J11
-2170D66l04K78j00j00J04J03k43J06Q3k65K86o4j73J77k9k9ppj7j7J80j69L4L5R9J00j02
-2172D25j03j5j5Q6Q7j17j17P3P3k10J38N5N5o8o9Q5Q5klk7k8k8k8RRRRK5K5j71J78J6J6p2
-2175C85p2J83j66RQJ14k35J07J07j24j24K75p3r2r3L1L1J2J3J3J3popoKLLKn8n8Q7Q7L2L3
-2178D29n5n4kjkkO4O4k20J30J5J5j59J90l4l4j2j2L6L5L6L6l5l5l5l5l7l6Q7Q7J27k22k5
-2180C04k6L9L8R0k59O2O2m6m7O4O4k4k3K0K0M2M2j91J58o0o0K67q2q9q9M6M6o3o3J78j70
-2183B50K6K6m9n0R7R6ppqpqpqqK3K3K4K3r2r2N3N4ppopL1L1j65J84k9k9ppk9l0N8N8k4k5
-2186C42O4O3j41j42L17l2k0j9m2m1K7K8o0n9ONj68J80j26K24l8l9j8j8m0m0J63j85K08j42
-2188B57Q7Q8j02j01J98j51J55j94R1R1j8j8k9l0n1n1J91j58L8L8k3k4jkj32K17o7o7O7O8
-2190C67k0j9J8J9J8J9J3J3p4p5J9J8J28k21P2P2l6l7JKJKM8M7j7j8j65J85j3j2j9j9J56j94
-2193B79J45k04J37J38k72P7J65j84L5L6L5L6k19J31K1K1l7l7J60j90R6R7p1p1j1j1j1j1k6
-2195B54k6L02k80J07J07p5p4L3L2j63J86k5k6llM0M1m6m7M2M3m5m4j29j29M02j80K8K7rq
-2197C32K5K5j38J52%%r8P6Q2k09P4j00k0J54j18J72l7l7j9j9N2N2l5l5oonoJ1J0J1J1LMk2
-2200C36k2K02k05J03p1P9k12J91j00nnJ22j68K04q6k8k8rj0P7P8m9m8m9m8N7N7l0l0JKKK
-2203C10KKKKl0l0N8N7O9O8p7p7JKJKooq6Q9o1K29j67PN5N4p9q0J7J8J7J8J2J2p5p6Q5Q4o1
-2206C62o1O4O4k3k3J2J2J2J2l0l0l0l0K1K1K2K1r7r6J54j37M6M7K8K8NMj92J58j%M3M3r1
-2208C38K58l39J1O2O3l8l9j50J99j71J77j23K27k32J17N7N7o7o6l7l6N1N1k3k4k3k4%jQ7
-2210C62Q7r5r4N0N1OPPOj04j04J00R9L2L2n5n5POPPj7j8j7j7J0J0J0J0l9l9M8M8jjjjj6j7
-2213C11j7j7J32J33k68Q1J2J1j12j13J74J73k05J44j99J51k4k4j5j5j5j5L1L1L1L1k8k9k9
-2216C21k9O6O7p9p8L0L0L1L0o4o4K4K3ONNOO4O4j97J51j61J88j83J66q9q9P8P7r4r5N0N1
-2218C11J01J01m4m5l3l4n5n6J43k06J86j62Q3Q2k6k6QQRQLLK4K5j91J58l9l8Q9Q8k0k0Q9
-2221E24k60K20j29k2k2M4M4PPj89J60p6p6R0R1l3l4j2j2j48K01MNj5j5j5j5k8k8O0N9%j%
-2223C86jm4m4M4M3rrrrJ8J8M0M0j91J58l9l8NNNNl0l1l0l0J02J02m3m3k6k6J70j79l8l7Q7
-2226C22Q6k8k8n0n0J52j97Q6Q7LMq4q3N0N1l6l7M8M7m0m0L4L5L4L5q4q3O1O2J7J6J7J6nm
-2229D14nmnmmnnnk6k7J43k07J86j63O0N9n0m9j0j0J87j63R2R1p6p6OOK8K8j83J66l0l1ll
-2231C22llk9l0N8N7qpl0k9J49k00Q4Q4r6r5J07J08o2o2MLJ04k46R7R6MLK5K6j75J75k2k2
-2234C87p9p8Q8Q9j84J64l1l1k3k3O4O5m3m3J54j96K7K6K01j48llk4k5J4J5J4J4qqpq%%%%
-2237C57%%%%mmnmnmk7k6K35j14k45L37o3o3k7k7J4J4J5J4qqpqMMMMkjk4k3K17j32k3k3j4
-2240C28j3P3P4r9r9M7M6o0o1O3O3J72j78J9J9OOk11J37J55j94K5K4L0L0j66J83p5p5L4L4
-2242C37J2J3J2J2n2n2L5L5QQQPj2j2j2j2m0l9M8M8QRj4j3J52j97%jK3K3K2K3JJ%Jpqqpkk
-2245C56lko3o3K5K4L1L2L1L2m9m9L8L8j6j6j6j7N4N3l4l4J9J9O9k79R1R1j9j8j4j5j4j5K3
-2248B90K3K2K3nmJ7J7j70J78R2k58N1N1L0K9j8j8j28K22j06j05O1O2J3J4J3J3o3o3K4K5R
-2251C41J0J0RJ5J5L7L7k03J45n0n1l6l7N1N1O6O6p9p9k0j9J98j50j06K44o3o2RRQRj7j7j7
-2253C24j7J9J9J9J9qrqqM0M1m7m7J3J2J3J2o4o4K20j29l2l2J43k07L2L2J0J0L7L7L7L8n6
-2256C99n5J40k08P9P8n3n2J49j99Q3Q4p4p3J3J3O1O1k7k7k5k5O1O2k3k4k4k3l3l2N5N5OO
-2258D28OOl1l0l1l0O7O8p8p7N7N8l0k9J5J6J6J6m8m8M0L9mnJ05k44L2L1J0J0M4M5m3m3P8
-2261D16P9o7o7J5J5L7L6k31J17RQm6m6M2M1LMLLpqqpk2k3O5O6j3j4k09J40LMK6K6J6J7j80
-2264B43J69n5n6L2L2J43k06j0rLMMMK6K6MLJ57j92MMm6m5M2M2K6K6O3O2l25K57p0p0J6J7
-2266C25J6J6nnonook8k8K18j31k3k2K6K6K7K6q7q6J97j52M5M4K3K2k8k8k8k9N4N4n5n5J42
-2269D48k08N4N4J57j91j7j7J84j64L2L2%%%JNONOp4p3J3J4%JJJK9K9K9K9m2m2M5M5k0k0k0
-2272C32k0L4L5n3n3K9K9K9K9k2k2k2k2l2l3N5N4OOj7j6J54j95K4K3j09K39o6o5J51j97kj
-2275B82O6O6k1k1K7K7q1q2J75j75K2K2M5M5m2m2J6J6J6J6n8n7Q8Q7llllr3r4J10J10q6q6
-2277B86N9N9rrrrnnonL6L5n1n2K8K9K8K8llr0r1Q7Q6o0n9N0N0l8l7K4K5K4K5l8l8l8l8K8
-2280B94K8K7K8LLKLLLLKj1j0j1j1l8l8M9M9NNNNp1p1P4P4j1j1j1j1l4l5N3N3J4J4p3p3J8
-2283B97J8J8J7K8K7K8K7p3p2J4J5%%%JNOONj0rj0j0l7l7N0N0RQj3j3J34k15R0R1j48K00q2
-2286D15q3K1K1K0K1o6o6K1K1M3M3m4m4L2L2j64J85j7j7NMKJKJm7m8M0L9LLLLQQRQl4l5l4
-2289C15l5R3R3j11j11P0P1p6p5M5M4M5M4j5j6j6j6K8K7n9o0Q7Q8j97J53n4n5J13J12p9p8
-2291C75QQj0j0j0rrqrqM6M6R6k52R0R0k0j9j6j6j6j5J1J2J1J1m3m3M5M4%%J09k40K8K7ON
-2294C15L7L7n0n1J7J7J26k23J05J06o2o2K3K3K4K3q9q9P8P7j63J85j1j1jjjjK6K7o1o1K3
-2297C32K2K3K3p6p5J86j62K13j35M0L9p7p7J1J0J5J6J5J5J6J5J5J6K6K6o1o1J0J0J0J0jj
-2299C88jjjjjjk3k2k2k2M3M4k3k2j31K19o6o5Q2Q2o4o3J1J1j0j1J33k16M6M6J37k12P2P1
-2302D07l0l0l0l0J3J4J3J3J4J3J3J3k1k2k2k1J4J5J5J4mlmmK4K3o3o4L1L1L2L1n4n5L3L3
-2305C52k5k5O1O2o3o4Q2Q2m3m2m2m2L2L2L2L3k7k6k6k6J0J0J1J0j%jj%jjjllllKKKKk9l0
-2308B89N8N8J5J6p1p2L6L5n2n2K3K2K3K2M2M2m5m5jkkjN3N3l4l4ppopJKJJpqqqO0O0q5q5
-2311B73O7O7k0k0nmnmj0j0j0j0K4K4K5K4llllK0J9o7o8J8J8J8J8kjjjkjjkllllllk5k5J70
-2315D61j78J7J8J8J7M0L9j78J71k5k6J8J9J8J8l9m0o1o1J86j63L4L3L8L8j58J90noj80J69
-2317D22l8l8j5j6L3L3J43k07L9L9j58J91j84J64j1j0KKLKj5j4j4j4k0j9O7O8o7o7K0K1J1
-2319C53J1L3L3j58J91j79J69k24J25J46k02Q1Q1q6q6QPR5R5m1m2j50J98l1l1j0j0l5l5l5
-2322B71l5J13J14l2l2j6j6j6j5MNNNnmnmM2M1j26j25K38j12Q5Q6q0p9QQRJ0J0J0j5j5J82
-2325E14j68k0k0M6M5j2j1j2j1k8k8J69j81M1M1K0J9m0m1J23n1J45k04Q0r5MLpqN4N3l4l4
-2327C52J5J6J5J5k0k0k0j9k7k8O1O0n7n7L1L1l5l5N3N2N1N2r4r4J0J0RJ0L1L1n6n6K9L0K9
-2330C75K9k2k1k2k1%%%%L2L1L2L1p4p4J3J4L2L2n4n5P0P1j7j7k2k2N4j20J64j86J96j53K7
-2332C23K7J04k46J18n7J07o7J45k9k9k9K8K7o0n9Q4Q5o1o1L8L7k8k8j19K31n3n3J9K0o8o7
-2335B79O7O8k0k0k0k0J77j73N0M9j46K02j90J58j5j6k5k4k5k4J2J2J2J2j7j6j7j6K0K0kk
-2337C50J67j82J4J5J4J5J4J5j9j8k15J34j1j2J1J1L3L3L3L4o7o7M3M2j71J78j8j8J6J7m9
-2339C42m9j17K32n1n1j4j3J83j65K8K9J16k33J53J52j89J59k30J19n6n6P2P1j6j5KLLKn2
-2342C59n2L6L5QQQQqqrqjj%jopooN0M9l7l8J7J7jkO3k28J09o4Q8q7J10o5PJ80j72LqrLLN6
-2345C93N7l1l1K4K4o3o4LMLMJ4J4K5K6o7J09Q6k04J9K0JJllllllll%j%%j%j%K4K4K4K4k5
-2348D11k5k5k5L9L9m9m8N0N0l8l7LLMLpqpqM3M3l4l3n5J19j32J59j47K7oJ68k2k2j1j1k4
-2351C87k4k4k4O9O8j8j9rrrrk0j9k0k0P6P6j2j1j%j%m9m8L8L9j0j1j0j1JJ%JJJ%JJJ%Jqr
-2355C57qqO9P0p6p6OOOOJ3J4J3J3l6l6N2N1j2j2j2j2ppopMNMMjjjkM0M0m7m7KKKKqqpqJ4
-2358C50J4J4J4k0k0k0j9P2P3j5j4k4k4k4k5K4K3K3K3p7p7O9O8j9j9j9j9M9M9l8l9J7J6J6
-2361D02J6n3n2L4L5KKJKK0J9o7o8L1L0L1L0m7m8M0M0j5j5j5j5M5M6m3m2PPPPj8j8j8j9K6
-2364C27K5K6K5k0j9k0j9KKKKnnnoL9L8L8L9k1k0k0k0k1k0k0k1K6K6K6K5j8j7j8j8J7J8J7
-2367C87J8k6k6k6k6K7K8K8K8j6j6j6j6k6k7J69j79L9L8J7J7ooooJ5J6J6J5l6l6l6l6M7M8
-2369C85m0m0P8P8o8o8N2N3j3j4j35K13p1p0nnnnJ4J5J5J5J4J5J5J4k6k7k6k7J7J7J7J7J9
-2372D18J8j77J71llJ9J9m3m4m3m4J09J10r5r4L8L8n0m9L1L0L1L0NNNMj7j7j7j7JKJKJJKJ
-2375C79qqqqqqrqK3K3K3K3k0k1k1k0J6J6J6J7oonoMMMMMMMLj7j8j8j8K6K5K6K6LMLMj9j8
-2378D06j9j8lmllJ8J8J9J8j8j8j8j8MMLMppppJ4J5J5J4j3j4j3j4QRQQlkllkllkJKJJKJKJ
-2382C71J7J6J6J7k7k8k7k7J0J1J0J0j06j06J56J56q2q1O4O4n1n0L6L7j0rj0j0l2l1N6N5n
-2385D10ooon4n5L2L3L9L8m8m9M6M6m1m1Q2Q3o3o3j4j4j4j4P2P2j5j6j7j7j7j7J0J1J0J0l9
-2388C68l9M9M8j3j2j3j3pppqLKKLKKKLJ2J2J3J2n3n3L4L4m0l9M8M7MNMMj6j6j6j6ONOOPP
-2391C82PQJ9K0o7o7K7K6K7K7m9n0L8L8J1J1J1J1nnonKLLKm1m1M7M6n5n5L3L3j7j6j7j6N6
-2394C76N7l0l1lmllLMLMLMMLJKJJJKJJjjjjjjjjJ6J6J5J6k1k0k1k0J0J1J1J0j1j1j1j1OP
-2398C81OPj6j5j6j5J9J9J9J9j2j1j2j2j2j3P5P4o5o5K2K2L6L6n2n1kkkkL6L7n0n1P0O9j8
-2401D53j8j6j7j7j7NNNMm0m0M8M7kkkkOPOOj5j6j5j6QPPQPQPQNNNOj7j7j6j7J4J4J4J4k3
-2404D04k2k2k3llmlL3L3L3L3k4k4k4k4J2J2J2J2KKKJKKKJj9j9k0j9J6J7J7J7k3k2k3k3J4
-2407C35J4J3J4nnonJ7J6J7J7oonoj7j6j7j7R6R6p9p9klklklklklklJ8J8J7J8mmmmRRRRk7
-2411D00k8k7k7J7J6J7J6nnnoK8K7K8K7qrrrk0k1k0k1J6J6noJ80j69p1J04j7j6J7J6j83J66
-2414D04l1l0J3J3J3J3JJJJJJJ%%%j%j%%jqrqrJ3J3J4J3jj%jk3k2k3k2J0J1j1j1J85j64L2
-2417C77L3j5j5j5j5OPPPppppJ5J5J5J5rrrqrrrrJ6J6J6J5NNp2J03j71J77j07O8qrLKj1j1
-2420C75O6j10J86j64K1K2%Jj96J53K2K2M4M4l3l2l3l2J8J9J8J9j2j2j1j2j2j2j1j2K2K3K2
-2423D03K2J%J%k9l0l0l0R4R3n1n2m1m1M7M6j2j1j2j2QPQPQPQPllllllllRQQQj3j4j4j3RJ0
-2426C90RJ0j2j3j2j2J6J6J6J6ooonj%%j%%j%lklklklkqqqqJ4J4J4J4j5j5j5j4PPPPPOPPO
-2430D04PPOnooon6n7Q9Q9q7q8N9N8j4j5j4j4J1J2J2J1J2J2J2J1k2k2k1k2j%%%J8J8J9J8m
-2433D25lmmj6j6j7j6J1J1J1J0M6M6j00j00L3L3L3L3qqqqqqqqMMMMMMNMPPQPj4j5j4j5MLM
-2437C67LLMLMKKKKKKLKkjjkjjjkMNMMj8j8j7j8J4J5J4J4pqpqMLMLLMLMKKKLKKLKKKLKQPQ
-2441D41Qn1n1L6L6j3j3j3j3LLLLLLLLooooK1K2K1K1n9n9K8K8JJJ%RRRQL1L1n7n7M6M6m1m1
-2445C86KLKLj%j%%j%jJ0J0J0J0p1p2P3P4k1k2k1k1RJ0J0Rj4j4j4j4K8K7K8K8m5m4M2M3n6
-2448C84n5J0J0J81j67K9K9l6l7N1N1k0k0k0k0J6J6J7J6K4K5o3o2L5L5n1n2M7M8j48K00l2
-2450D41l2j0j1l2l2N5N5K4K4o3o3P2P1p4p3KLKLK3K4K4K4p4p5P2P1o7o7K0K1N1N2l6l6on
-2453C78onP1P1p5p4J5J5J5J6j6j6j5j6RJ0RRJ0RRRopppj3j2j2j3N2N3l6l5kklkk2k2O5O6
-2456D67k1k0k0k0nmnnmnmnJ2J2J2J2PPPOK3K3o5o5K1K1K1K0%j%j%j%jj6j6j6j6OOOONMNN
-2460C98J0J0J0J0l8l8N0M9l1l1l0l1O6O6p9q0N7N7l0l0k3k3O4O4j2j2j2j2KJKKKJKKrqrr
-2463C78P3P3p2p2J3J3J3J4m5m5M2M2qqqqlkllONONj6j6j7j6L6L6L6L6p9p8RQK5K4K4K5n0
-2466C93n1L7L8m5m5M3M2jjjjlklklkllJ2J2J2J2rj0j0j0llllj0j1P7P7o6o6K2K1rrj0rP8
-2470D69P8o7o7ppqpnmnnL9L8m8m9M0M0m7m8kkQ6Q5l6l5l6l5K1K0K1K1rrj0rL5L4p1p1J93
-2473E21r9k2k2kjkkN4N3l3l3pok4k4J44j48J15o0K1K0RJ0k9k8l9l9R1q3J68j22J06o8J1J2
-2475D42n4n3L3L4K5K5o2o1J4J5J4J5KKj6j6Q8k03J34l9J12o3o3J12r0Q4lkKLLKj9j9j9j9
-2478C60K2K3K2K3l7l8p4J01J83k25J13o1o4o5P0O9%jj%m1m1M7M6qqqqk1k0J42j48K1K0KK
-2481C97KKKKRJ0J0J0l4l4N3N3p5p6J1J2M7M8l9m0L3L3n5n4M9M9M9M9r8r8M8M7j3j2j3j2j2
-2484C60j2j2j1K4K5K5K4qrrqJ3J3J3J4ppppJ5J5J5J5k5k4k5k5J1J2J1J2LLKLLLLLj4j4j3
-2487D03j4QQQQrj0j0rL0L1n7n7R2R3n3n3k6k6O2O1j1j1j1j2k2k2k2k2j3j3P5P4l1l1l1l1
-2490C46N4N3l3l3ooopJ2J1J1J1j1j1J64j85J88j62J3J3rrrrJ5J5J5J5k2k1k2k1K7K8K7K8
-2492D64k3k4k3k3JKKKKJKKQPQQPQj4j4J60j88QQj4j4j4j4K9L0K9L0k1k2k1k1jjjjM0M1M1
-2496D86M1o0n9K8K8k6k7k7k6M9M9l8l8NOONN1N1l6l7j4j5j4j5N6N6n4n3J70j79J8J7noon
-2499C82J0J1L2L3j14K36k45J05k1k1JJj1j1j1j1%%%
-2500C66
##END=	
##END=	
##END=	
##TITLE=	1PulseWALTZ16-H
Sample 2
##JCAMP-DX=	6.0	$$ MestReNova 14.0.1-23559
##DATA TYPE=	LINK
##BLOCK_ID=	5
##BLOCKS=	1    
##ORIGIN=	Mestrelab Research S.L.
##OWNER=	yma80
##$MNOVA/LINK_BLOCK_TYPE=	PAGE
##TITLE=	1PulseWALTZ16-H
Sample 2
##JCAMP-DX=	6.0	$$ MestReNova 14.0.1-23559
##DATA TYPE=	LINK
##BLOCK_ID=	6
##BLOCKS=	1    
##ORIGIN=	Mestrelab Research S.L.
##OWNER=	yma80
##$MNOVA/LINK_BLOCK_TYPE=	ITEM	$$ NMR Spectrum
##$MNOVA/ITEM/POLYGON=	(XY..XY)
5321,5835
8722,5835
8722,8208
5321,8208
5321,5835
##$MNOVA/ITEM/Z=	0
##$MNOVA/ITEM/ANGLE=	0
##TITLE=	1PulseWALTZ16-H
##JCAMP-DX=	6.0	$$ MestReNova 14.0.1-23559
##BLOCK_ID=	7
##DATA TYPE=	NMR SPECTRUM
##DATA CLASS=	XYDATA
##NUMDIM=	1
##ORIGIN=	
##OWNER=	yma80
##.OBSERVE FREQUENCY=	42.633000000000002672
##.OBSERVE NUCLEUS=	^1H
##.SOLVENT NAME=	
##.PULSE SEQUENCE=	
##LONGDATE=	2019/07/10 19:48:38.000
##.ACQUISITIONMODE=	SIMULTANEOUS
##$ORIGINAL FORMAT=	Magritek Prospa
##$MNOVA/SCALES_VERSION=	8
##$PARAMETER FILE=	(acqu.par, ASCII, c:/Users/yma80/Data/OrganicMixtures/2019-04-04%20Organic%20Mixtures-2/Benchtop_Data/OrganicSample2-2/1PulseWALTZ16-H/1/acqu.par, 0)
$$ 90Amplitude1H = 0
$$ accumulate = "yes"
$$ acqDelay = 20
$$ acqTime = 6553.6
$$ b1Freq13C = 10.846058899999999
$$ b1Freq1H = 43.129483800000003
$$ bandwidth = 5
$$ dataDirectory = "C:\Users\Spinsolve\Expert_Ellen\OrganicSample2-2"
$$ decoupleAmp = -12.0
$$ dispRange = 0
$$ dispRangeMaxPPM = 300
$$ dispRangeMinPPM = -200
$$ dwellTime = 200
$$ errorProcDef = "yes"
$$ expName = "1PulseWALTZ16-H"
$$ expNr = "1"
$$ fdPhaseCorr = "none"
$$ filter = "yes"
$$ filterType = "exponential"
$$ flatFilter = "yes"
$$ incExpNr = "yes"
$$ nrPnts = 32768
$$ nrScans = 1
$$ nucleus = "1H"
$$ offFreq = 0
$$ pulseLength1H = 9.5
$$ pulseLengthC180 = 256
$$ repTime = 10000
$$ rxChannel = "1H"
$$ rxGain = 22
$$ rxPhase = 37.8
$$ saveData = "true"
$$ shiftPoints = 1
$$ usePhaseCycle = "yes"
$$ usePPMScale = "no"
$$ zf = 2
$$ 
##$PARAMETER FILE=	(datafile, ASCII, c:/Users/yma80/Data/OrganicMixtures/2019-04-04%20Organic%20Mixtures-2/Benchtop_Data/OrganicSample2-2/1PulseWALTZ16-H/1/fid.1d, 0)
$$ 
##XUNITS=	HZ
##YUNITS=	ARBITRARY UNITS
##FIRSTX=	2500
##LASTX=	-2500
##DELTAX=	-0.076295109483482115298
##XFACTOR=	1
##YFACTOR=	6.6737602290076544211e-07
##FIRSTY=	0.001090585486963391304
##MINY=	0.00043120875488966703415
##MAXY=	0.56420654058456420898
##NPOINTS=	65536
##XYDATA=	(X++(Y..Y))
2500A634r5r5O0O0K6K6n2n1J1J2J1J2OPPOKJJKJJJKrqqrqqrqMNMNMMNMklllllklJ2J3J3J2
2496A592k6k6k6k6J6J6J6J7lmllppqpK7K6n0n1R0R1o4o4K8K8K7K8j05j04M9N0KJKJJ0J0J0
2493A553J0rj0rrOPOPPOPOJJ%J%J%JoopoooopMLMLMLMLj3j3j3j3K1K0n6n7R0R0o5o4kkJ72
2489A656j37%jJ54j55J9J8%jj%j%jj%j%jk0k0J54j55J9J8QQQQj2j1j2j1J9J9J9J9k0k0k0j9
2486A526qqpqJ2J1J2J2j1j1l0l0J83j27M8M7j7j7j7j7KKKK%jjjm9m9J25J25j99J11o3o4K1
2483A506K0K1K1M9M8j05j06M6M5M6M6m3m2J31j77J5J6mmklkkkklkRRK8K7j36J73jjr0r1O5
2480A503O4k3k3k2k3RJ0RJ0RJ0RRLKKKLKKKnnnnj5j4j5j5O8O8q7q7L8L9L9L8k4k4k4k4J4J5
2477A539J4J5NNNONNNNl2l3l2l3OOOOK2K2K3K2j7j6j7j6J9K0K0K0k9k9k8k9Q3Q3p2p2J5J5
2474A542J5J5KKKKJKKKklkkk2k1k2k2K1K1K1K0j8j8j8j8OOOOOOOOj5j6j6j6P1P2q4q3J7J6
2471A496J7J7PPPPj%%%j%%jj4j5j5j5K4K4K4K3j9k0k0j9j%%jJ2J1J1J2rqqq%jjjj0j0j1j0
2467A480Q3Q3p2p2J5J6J5J5opopopopK2K2K2K2j6j7j7j6ooooJ4J3J4J4%j%%%%%%JJKJJJJJ
2463A572noononooj%jjjj%jNOONOONOkkkkkkkkj5j4j5j4K7K8K7K7p1p2Q3Q3k3k4k3k3%%%%
2459A531%%%%J1J1J1J1qqrqooonJ3J4J3J4JKJKJKJJklllJKKKl3l3M4M4q6q7O9O8KJKJqqqq
2455A540KJKKJKJKQPQQj2j2j1j2RRRQj0j1j0j0RJ0J0Rrj0j0rQRRRj1j0j0j1J6J6J6J5j6j7
2452A554j6j6NNONj4j4j4j4J9K0J9J9%%%%rj0j0rRJ0J0Rj8j8j9j8J%JJJ4J4J4J3J4J4J4J4
2449A605j0rrrj0rrr%%J%j9j9j9j9K3K3K3K2MLMLnnnnnnnnNMNNN5N4r9j00N2N2k5k5N2N3k5
2445A584k5RJ0J0Rj9k0j9j9M9N0k8k8o7o6Q8Q8m5m5L3L2m0m0L7L7m0m1L8L7kjkjjjkjjjjj
2442A554j0rj0rK2K3K3K2j0j0j0j0m6m5L1L2m7m8Q1Q2KKLKp6p7N2N3jjjjj1j1j1j1N7N7k1
2439A612k0l6l5M1M2popoj2j1j2j1popok4k3N4N4rrqrPPOPKKLKK7K7m9n0popoL0L1L0L0k0
2436A598j9k0k0M0M0l7l7p1p1N7N8K6K7n1n1K0J9K0K0KKJKKJKKj3j3j3j3jkkjO7O8o1o2J1
2432A527J1J2J1j9j9j8j9J4J3J4J3MMMMMMMMNNNNl2l2l2l2O7O6j0j1j3j2j3j2rqrqN4N5k3
2429A578k3POPPk2k2N5N5l8l8l9l8MLMMN0N1p9p8Q6Q6m3m3kllkooook2k2N6N5k7k7N1N0n2
2426A568n3K5K5n5n4P5P4MMMMn0n1K6K7kkkklkkkL3L2m5m5qqO9P0p7p7J%J7J6o0o1J11J12
2423A636j8j7n7n6K1K2m9m9Q1Q0k9k9k9l0Q2Q2p3p3J4J5J4J4NNNMNNNNk3k4k3k3J5J5J6J5
2420A559mmmmmmmmJ4J4J5J4k5k4k5k5J8J8J8J7j1j1j2j1P4P3q1q1OOOONNMNNMNN%%j%%%%%
2416A557KKLKKKLKk1k1k0k1J8J8J8J8j5j4j5j5NNMNRJ0RRRRJ0Rk4k3k3k4J5J6J5J5J4J4J3
2413A606J4k5k5k5k5kjkkK7K7K7K7p9p9P5P6j1j2j1j1nonnonnoJ%J%J%J%J0J0J0J1k9k8k9
2410A485k9K7K7K6K7j2j2j2j2J9K0J9J9j9j9j9k0RQQQRQQRj6j6j6j6K3K3K3K2j0j0j0j0j0
2407A559j0j0j0QQRQRQQRrqrqrqrqJJJJJKJJjkjjkjjkJ9J8J8J8k1k1k0k1K6K7K6K6j2j3j2
2403A584j2jjj%k0k0k0k0K6K7K7K7j2j2j2j2MLMLj6j6j6j6ONONJ%J%N1N0k7k8n6n6P3P2l8
2400A563l9l9l9L4L4L4L3ppqppqpqMLLMLLMLj0j0j0j0J0RRJ0K1K2K2K1j7j7j7j7llmlk3k2
2396A507k3k3M1M1M0M1k4k4k3k4onooJ4J4J3J4PPQPj2j3j2j2JJJJKJJJklkkj8j9N9N9o6o6
2393A490O2O3m4m3m4m4L8L8L8L9k7k6k7k6PQPQPQPQkjjkjjkjMLMLl2l2M6M5o2o2O7O6l9m0
2390A507L8L7m6m6L0L1k7k7N0N0j7j7O1O0j10j11J9J8rrO8O8l2l2l2l2J1J2J1J1J1J2J1J1
2387A580k3k3k3k3J6J5J6J6mmlmK4K3K4K4q4q4M5M5l2l2M5M5KKJKKKKKmmq1q1R9J00l0k9j2
2384A552j1j2j1J9J9J9K0j5j4j4j4NNNNkkklkkkkonooonooJ1J2J1J2J1J1J2J1nmnnnmnn%j
2380A547jj%jj%jjj%jj%jLLLLMLLLpopopopoQQRQRQQRjkjjjkjjONOOOONOk8k8k8k8J1J0J1
2376A533J0J5J5J4J5k4k4k4k4J7J8J8J8k1k1k1k1L7L6L6L6k8k9k8k8mmnmmmmmJKJKJKJKJ1
2372A515J1J1J2J1J1J1J1kkkkkkklkkkkkkkkmlmllmllJ8J8J9J8k0k1k0k0kkjkkkjkK7K7K8
2369A593K7j2j1j2j1klkklkklj4j4j5j4K4K4K5K4k5k4k5k5J4J4J4J4nnonnonnOOOOOOOOml
2365A551mmlmlmNNNNNNNNQRQQl0l1l0l0J9J9J9J9j9k0l9l9J67j43L1L1J2J2pqJ53j57j58J53
2362A526lkJ7J7KLKKLKLKj7j7j7j6K1K2K2K2lkk2k1J52j57J7J7m1m0J34j76L7L7J7J8J2J3
2359A586J3J3k6k6k6k6OPOOOPOOjjjj%jjjjjJ8J9j56J54k1k0j8j8J56j53KJJ56j53LMLMj13
2356A417J97j52J58m0m0k1k0QQQQO7O6j08j08J53j56J8J8PQPQPPQP%jj%j%jjK4K3NMJ14j96
2352A509k1k2L2L1L2L2pqppnonnonL9M0l52L69l6l7RRQRj0j0k9k9J35j74%%J04J05n1n0n0
2349A531n0K7K7J1J0o7o7N4N3mmk9K80k23Q7o8o8K9K9nmmnJ1J0J0J0n4n4J01J00n1n1n1n0
2347A471L2L3L3L3ook5k5J51j59L4L5j59J50k3k4k1k1J53j56J7J8kkNMNNMNj5j5J50j60J4
2344A533J5n9n8R7R6j%p8p8N7N8k0k0MNMMm9m9K9K8K9K9m9m8O4O5o5o4O3O2o6o6P1P1n8n9
2341A497MMLMO3O3o6o6M8M8k9l0l8l7M0L9j1j2j2j2K3K4K4K3K5K6j04j04J09J09p2p1OPOP
2339A538j3j3j3j3O5O5o4o4K7K8K8K8l5l5l4l5J9J9J8J9P5P6j06j05M0M0l7l7J5J6J6J5OO
2336A555OOL4L3m4m4MNMNk9k9M9M9l1l0M7M7q9r0M0L9LKKLN1N2p7p7J5J5J5J4j3j4j4j4L6
2333A536L7L6L6r7r6Q4Q4j8j7j8j7J4J4J4J3n8n9P1P0j2j2j1j2n2n2K5K6L5L4m2m2OOOO%%
2330A538J%nmnnL9L9l8l9M9M9k9k9KLKKp5p5N4N4klklJ%JJM3M3l4l4RJ0RR%%%j%%j%popop
2326A541opoK0K0K0K0m8m7Q1Q1p5p4LKJKJJK2K2n5n6K7K7K7K7onnonnJ4J4j54J55j8j9J%K0
2323A552K0j12J97k68K49m2m2rj0J4J3J4J3k5k5k5k5J0RL0K9j25J83j44J64j57J53j76J33
2321A598k2k1kkJJKJK1K0j53J56k0k1jjjjjjj8j8l8l7J56j54J76j35J62j47K6K7j47J62j3
2318A555j2JJK0K1j44J65k8k8N9k51P8P9J0J1J0J1LKj51J57j71J38j7j6j8j9J56j53JJl8l7
2316A396J97j13M2M1J32j77llK7K6K7K7j1j2j2j2l0l1l1l1j2j1J62j46N4N5L5L5r1r0O4O4
2313A568KKK1K1j82J27m7m6L8L8j16J93j74J35k0k0J%J%J%J%llJ71j39llk2k3jkk0k1J53j56
2310A472J8J8QQRQQRQQk9k9k9k8j0rJ64j45M3M3M3M3k33P7N7N7l1l1M6M6l1l2J43j66J9K0
2308A572p6p7P3P3q2q1K6K6K01j09J7J7llPOj68J42J9J9k32K84j91J19m2m2J51j58L5L5j61
2305A397J47k6k7Q0Q0p5p4J7J7J7J7kklkO9O8q6q6KJJJJJJKJJKJjjjjkjjjK1K1K1K1j8j7j8
2302A563j8nonoL3L3L3L3l8l8l9l8%%%JJKJKK0K1K1K1l7l6l6l6R9R9n6n5o7o6Q8Q8qrqrRR
2298A561RQRRRQj5j5j6j5o4o4R1R1l7l7l7l7L7L7L7L7kjkkj1j1j2j1P0O9q5q5LKKKJ0J1J0
2295A563J1rrrqL2L2j42J67m5m5k6k6L8L9L8L8k6k7k6k6J7J6J7J7m1m1J32j76N2N2j42J68
2293A605ooL2L3j82J28m6m7j7j7j7j7J05J06m9m9jjj%j5j5l4l4J78j31O3O2j23J86j43J66
2290A713k01J09m7m6L0L0j44J65r6r5P8P8k1k1k1k0L7L7L7L7j00j01P3P3j49J61j4j4j1j1
2288A546j1j2QQQQJ7J6J6J7lllml2l3l3l3OONOL5L5L5L5k9k9l0k9NOONP3P4q2q1RJ0RR%%j
2285A565%J3J3J3J3k6k5k6k6mnnnm8m9J07J06k5k6N2N2j23j24L1L1J23J24j35j34L0L0L0K9
2282A576N0N0j05j05K0K1K1K0mlmmj4j3j4j3Q6Q5o9o9J8J8J8J8ooooj6j6j6j5P3P4q1q1OO
2279A494OOK6K5K6K5m7m7L1L0n8n8R7R7k4k5k4k4KJKJj8j8j8j8J3J3J4J3J3J3J3J3j1j1j1
2276A562j1j1j1j2j1J2J1J2J1J2J1J2J1nnnnnonnlkllklllj3j3j4j3J5J6J6J5N3N3j01j02
2273A447M4M3l4l4N5N5k2k2k3k2k2k2L9L9M0L9k5k5k5k5J9J8J9J8k0k0k0k0L1L0L0L1r1r1
2271A434O5O4m0m0L7L7k1k0N6N7j2j1j2j1poppJJ%J%JJ%J%JJ%J%JMLMMLML6L6k53K63k02J08
2267A576o7o8K9K9Q7Q6o8o8K9K8m9m9KKKKJ7J6J7J6LLKLLLKLl2l3l2l2L2L2L2L2nonoonon
2264A546J0J1J1J0q6q6R4R5k2k1N6N7q5q4opPPPPJ2J2J2J1klllL6L6m2m2M8M7l1l0k2k2k3
2261A512k2j7j8J11J12j30j31L08k08j44J66m1m1O9O8qrnmmnjjjjp7p7N2N2J8J9J8J8PPQP
2258A607l7l6M1M1j2j2j3j2pqppK6K7K7K6n5n6K2K1%%%%m3m4L4L4L5L5m2m3qrJ66j44j1j1
2255A525M7M7QRo9o9L0K9j44J65j4j4NOj9j8%Jr1K18j4j4j68J42l2l2J1J1J08k01J8J9P6P7
2252A653m1m1o1o0J90j18m2m1K34p6K2K1K4K4k47O2J27j82Q8Q8m4m4L3L3m9m9K8K9j8j7l7
2250A489l7J61j48p1K39o6o6J86j24J21j88l4l3M0M1j02K09j98L17j33j34N8N7j%j14J96j39
2248A526j39L35j80L3L2o4o4O4O5j34j35L37j80N6N6n4n3M7M7l1l0l5l5M2M2J2J2J2J2p0p0
2246A456Q4Q5j9j9j8j9rrrrLLLLLMLLLLLLLLLMnmmnmmnmNONONNONqpqqj7j7j7j8Q4Q3p1p1
2242A497J5J6J6J6K4K5K4K5j01j01N4N3opppLLLLQRQRQQRQpqqpqqpq%%%J%%%%J0J0J0J0k9
2238A566k9k9k9K3K2K2K3j7j6j6j7J8J7J8J7O6O6q9q9j0j1RQj26J82RRq4q3P2P1j5j6MMj48
2235A402J62j2j3PPQPj3j2J62j48K6K7K6K7j51J58j90J20N2N2q3q4K6K5K6K5k3k3lmj72J38
2233A552J37j72K2K1LKJ6J7L6L6j48J62j67J42k76L4K07j02J4J4nok7k7m6K63j24j24N0N1
2230A555J0J0J1J0JJj93J17J36j74M0L9j54J56%Jj62J48qpr4K15M1k68J72j38J7J7N6N5P5
2228A685k34K5K6POJ6J6j58J52%JK0K0n9n8R5R6j00j01K8K9M1M1M1M1j25j26K29q0M0M0Q6
2225A740k24q9K21n1n0j5j5J60j51K8K7PQo5o4O4O4j2j1PQj47J62K01l14J9J8J61j48J5J6
2223A570mlN8N8l10K06J02J01k72L7L4L5n6n6r7K12m0m0Q6Q5k18R2L3L4k4k5m3m3L5L4K0K0
2221A621K0K0k7k6P0k40K8K8J83j26k5k5L2L3j0j1K2K2k21K95j69J40m5m5N1N2o2o2R3k17
2218A399K44o5J2J2k5k5J49j60J3J4onkkN7N6O0k50J75j33JJK72k44J2J3k0k0j9j9J55j55
2216A495O8O8m8m8J37j73P9P8p6p6K0K1p6K33j92J17n2n2J61j49r2K17l4l5j26J83j65J45
2214A628l6l5j6j6N2N2p7p7P3P4j78J31ppL1L2j30J80K5K5j75J34k13R6K4K5j30J79m2m1k3
2211A558k2Q5Q5k18R1K9K8j0j0j60J50P2k37L4L3J5J4J9J9J9J9J3J3k77K38j6j6j58J52k7
2209A535k8qqM7M6l2l1O7O7r4r4k7K82j95J14l2l2J61j48l3l3K5K5m3m2K08j00J0J0rj0J%
2207A599J%o5o4J2J3OOJ80j29P3P3k49O0M1M1j7j7J%JJnmmmJ4J4j60J50J4J4m4m3K8K9m9m8
2204A469O9O9k22K95r6r6O6O5j4j3r1r1R2R2O6k43J96j12O1O1j43J66q6q5J1J2J1J1M6M5J42
2201A753j68j4j5l4l3J1J1J1J1J1J1J2J1K3K3j51J59J7J6k15R4p9p9K43o7l4l4n4n3N6N6P5
2199A574P6j68J41l3l2K2K1n6n5O2O1j5j6N6N5r2r3J97j12l5l5J18j92N9N9lmlmooR1R1k16
2196A507R4R4k15R8R7j73J37n9n8R0Q9r9j00K03j06RQl0l1J03k06J99j10J08k02Q2Q1k2k2
2194A566Q8Q7l41J74n7K52j03j02j28J81q0p9J71j37K28q2j78J32ooJ4J4q0q0M9M9J5J5J5
2192A591J5j9k0J55j55m9m8Q0Q0k21Q8J65j44N2N2m4m4M0M0l7l7L7L7m0m0O9O9o0o0M1M2q7
2189A548q8K4K4K4K4k3k3N5N4m6m6L1L2qpq5q4O4O4j3j3M5M5j29J81k2k1k1k2J53j57J8J7
2187A595ooJ49j61J58j51p4p3R7R7j86J23j09K01l2l1k8k9O9O8j54J56j9j9m5m5m4m5O4O5
2185A585j09K00n6n5j7j7j71J38J38j72J5J4K66k50J50j60KJj50J60j5j4M3M3O3O3j63J46
2182A678k02J08rqJ1J1o1o1K30k87J15J15m6m7J0J0J0J0o6o6O3O3o8o9J83j26J04J04k50N9
2180A518K37k78J2J2K13r6n1n1P5P6j76J33p3p2P5P6l9l9L9L9QQo9o9J7J6J7J7QPPQMLO9k41
2177A440L58j57j89J20k1k0jjL0L0K9L0l5l5l5l5K9L0K9L0m4m4m4m4J17J17j66J43k03J07
2175A565K9L0m2m2L6L6o9o9QRM0M1l7l7J10J10k44O5j3j2OPJ8J7j37J72j57J53j76J33j7j7
2173A516KKN7N7j75J35r5K15o8o9k0k1k0k0J1J1L1L0j46J62o9o9k4K85j92J18r2r2K30p9p8
2170A533p8j42J67Q2Q1j50J59l5l6j5j6o0n9O9P0L7L7m0m0L0L1j43J66n1n1l1l1lklkR7R7
2168A668p7p7J46j64J0J0K9K9M9M9j45J65j84J26k9k9j0rJ9J9J9k90K10r9N5N6L6L6L6L6j37
2165A553j36J91j17L4L4L4L4j91J17J18j91M0M1K1K1j7j8j8j7O9P0q5q5L3L3L3L3j5j5MNj74
2163A439J36l8l8J0J0J0J0M6M7j09j08J24J24k05J04kkJ7J8PQK7K7j61J48m6m5K67m2l13K02
2161A672n4n4k2k2QPj2j3J44j65j0j1K12r8P7k33K01j09M6M6kkj96J14J40j69K5K4NNNNk2
2158A542k3J33j77J70j38J6J6j5j5l5l4J88j22N3N2p0p1Q5Q4r0r0Q5Q4j60J50k5k4MNMNpo
2156A574poLLLLq3q3K46o4J4J3onM2M2r4r3j32J77L6L5j41L75j73j73MMm1m1L74l48L8L9J67
2153A702j41L2L2mllmlllmj5j5J7J8j86L30j35j34J69j41L3L4MMNMmnJ5J4j59J50k4k4%%J
2150A554%%%j9j9J67j42L2L1ppJ67j42k6k6m6m6LLj7K93m7m7k01J08KJj53J56qqL1L1j83J28
2147A563o6o6J88j21N3N3l9l9L9L8r0q9K39p0p1p0O5O5j3j2K00l16P6P6M4M3j00j01L5L5J17
2145A666j92N9N9m5m4J30j80M3M3K3K3k3k3N4N4j30j30J28J28m0m0L8L7p7p7R7R7j91J19n5
2143A551n6J3J2J3J2M0M0j34J76n7n7n6K53j00r9P5P5j09j09K19q9KKJ5J5k66K50m0m0L5L4
2140A620j40J70m3m3k4k4L0K9M9N0j03K07j22j21K8K8K8K8n3n2K38k78K1K2RQj15J94n7K52
2138A836k82K7j66J43J63j47n0n0J62j48M6M6j52J57j7j7K1K0J95j14l1l1n0n0N4N3j20J88
2136A686p5p5n7n6Q8Q7q7K23j00r9j00K10j23j23P0P0o5K44o5o5q3K26j02j02P2P1j02j02
2134A466K23q7o8o7J11J12nl14L36j79J4J3k9l0O7O7j62J47k39K76p2p2J15J15j31j31L14
2132A790k02L0L1j57J53j45J64j84J26O3k47J01J02l7l6M1M1l6l7M1M1j2j3j3j2n2n1J03J03
2130A696p2p2NNJ5J4o2o3N3N4N3N4j26j25J51J52l11jK69k46P6P6r9K12k79K36l4l4k2k1J20
2127A674j89K41k75J69j39J21J21l62J53J49j61M6M5q0q0P5P4J7J8J7k92L32K2q1q1K9L0J26
2125A719j83J8J9J8J8j25J83k80K35l6l6lmj9k0J54j55J9J9%jk9l0J45j65Q7Q6o8o8o3K47
2123A682q3q2J4J4J5J4poj81J29%jJ94j17k2k2m1m2M9M9L0K9J68j41J3J4M2k67O2O2jjjjJ4
2120A578J3R1R1j11j12M4M3l9l8n8n8K16r3p4K36k22Q7r9j00K77k39P1P0j36J74j%NONNNO
2117A643NNl3l4l3l4P3P3P3k36J48j61k5k6J86j24k7k7J48J47j10j10L0L0L1L0j8j8l7l7J03
2115A635k06K51n8j88L27j37j37P9P9r5r5J57j52R9R9p9q0J52j57J84j26j6j6j11M05j95J15
2113A734j71J38r4r3M6M7l1l1nnP2P3j%R7k13Q5Q6k63M7Q0Q1n5n5QQQQM7M7j08j08M2M2M1
2110A604M2q9q8O6O6o3o2J90j21J1J0rrO0O1r5r4L1L1O4O3k65K50l9m0J2J2j43J66j55J53
2108A620jjk0k0k1k0J1J1J1J1j3j3J61j48M0M0p6p5K28q0o1o2K7K7M7M6j86J24n0n1J07J07
2106A720m8m8o7o8Q8Q7p3p3K18k99O6O5L4L3j5j5j5j5q3q3P2P2%J%JJ0J0J1J0j4j5j4j4P7
2103A616P8p7p7l1l1L37j79pol9l9K3K3K2K3L2L3j61J48L5k74P3P4l0k9l0l0J57J57k43O6
2101A614k55K59J63j46j29j30J09J08LKp5p5Q9Q9j62J47K6K6k05J03Q0Q0k09R9j66J43j2j2
2098A564LLLLJ2J3J2J3r1r1Q4Q3j82J26o6o6K25q3J3J3m0m0R5R5P1k39n1K57l32J84RRj51
2096A458J58Q1k29N2N1L3L2k9l0j0rj39J70J71j39NNl3l4J68j41k6k5n1K59Jl08J32J32j97
2094A508J12j53J56KKqqJ85j24j61J49k5k6j22J88j61J49l6l6j6j6o0o0p9K30m6m6L21j94
2091A625M9k61L6L6Q2Q2r2r2J89j21J49j60m0m1J91j18K3K4MMj10j10J47J48l6l6l6l6K9K9
2089A558K8K9o8o8Q7Q7K5K5M5k65J80J80k72L8M5M4r2r1jjJ73j36L1L1L1L1k21Q9P0O9j01
2087A580j00N3N4j3j4NOr1K18j10j10Q8Q8L0L0k50O0M0M0q6q5O9O9N1N2m5m5J95j15j27j27
2084A410L27j89J21j88K5K6POK7K7p0p0K06j04R0k20J12J11q1q2J84j26J46j64Q1Q2r2r3K9
2082A538K8K9K9n5n4K35k80Q1Q1k41K74o7o8J39j70P1P1j22J88j35j34K33p6o2K48j20j19
2080A542J98j10NNj73J36l8l9MMMLJ15J15j94J15k28Q2NM%%J9J9p0K38k64M6J8J7K31k85Q6
2078A610k23N5N4J73j36J35J34k90J9%%n0n1J24J24r9K10k42k41K93j8N4k56K44o7qqM8k62
2075A326K42o8JKj8j8M4M3k46K69k8k7NNj0j0J64j45K4K3Q1Q2j14j14M1M1J5J4j40J69j88
2073A465J20k27Q2J85j24P0O9m1m0qqk04L13l26J90M00n29POL14No0n9j47J63l1l0J64j44
2071A575K9L0j0rk8k9J28j81K5K5j78L38k43K73j39j39M7M8P6P7p8p8o3o2J24J24k62K53n
2069A668mk52K64k5k6OOOPk2k2m1m1K15r4p5p5Q1Q1j50J58k33P7P6P7j22j23K07j03P6P5r8
2066A574r8O8O9j84J27Q1Q1l64J52K01j09K1K0j02j03J30j79K44o4J09k00R9J00j7j6N5k55
2064A440N5N5J34j76R5R5j51J59k67M3N3N2P2P1n1n2n1n1O1O1k28K87j24j24J98J99m13J04
2062A546J80l35R4R4j12j12J92j16Q9Q9k49K66k3k4n4n4J01k09K49o1J6J7M9M9O8k41J3J3
2060A535P1P1j08j08O6O6j58J51K66k49l1l1R1R1r9r8k1k2L6L5N4N5j60J50j79J30j95J14
2058A523J15J14j07j07J82l32M9M9R4R4p3p3Q1Q1o8o8q8K22p6p5n6n6K10K10l25j5QRJ24j84
2055A462M8M9j25J84j45J65J0Rj6j6j70J38j43J67J2J1J%p6p7P8P9p6p6P4P4R3k16NOj4j4
2053A501L4L5j40J70m6m6m5m6K93j7j01j00L9L9M0L9j6j5j6j5J0J0J0RNNNOllj00r9K07j03
2050A546K06l08Q3Q3J67j42k24Q5M6M7m8m7J08J07l4l5j5j5j51J58J6J6k74K41J06k03J42
2048A661j67K45k70K71k45J3J4L9L9M0L9q1q2P3P4o3o2J5J5O8O8q7q6nmmmJ6J5J5J6llk2K87
2046A835j46j46j7j7L17m04P9P9j9j9J74j36j28J80POk06J03J04k07L4L4J5J5M6M7k43K72
2043A659j5j5j56J52r4r4K54n5LKj13j13K04j05M9N0J33j75kjQ0Q1k29Q0q1K28m10L12o1o0
2041A508J59j51J5J4nnmnnnL5L6L5L6qqqqk2k2P5k34J14J13m1m1j48J61O4O4p8p7j%J%J%k
2038A553lJ07J07m13J04P1P1O0N9r5r5m8m8l5K74k87K29m2m1L5L6L5L6m5m5K45k70L3L4Jl08
2036A315K74l6l6l6J05J04j27J81j69J40r2r2j9j9J16J17P4k34j77L39k01J08O3k47k4k4K08
2034A611j01N0N1L1L1p5p5P9Q0L6L6l32J84ONj17J92j59J50k4k4M9k61K42o8l7l6j53J57m
2031A524mnmJ24j85J37J37k47O3K95m27J04J05q9q9J43j67M14l08l8l7J17J18j54J56o3o3
2029A557k14L01J2J1p4p4j19J90k1k1P6P6p9p9O9P0j53J56K8k82Q2Q2Q2Q3k07J03p1p1J3J3
2027A539J3J3M4M4j10J99k75L5o2K47j05j05J34j76K52k64J80j29P4P4n6n5j18J91J8J7k8
2025A591k9k9k8K9L0k9k9q3K25n8n8K47k69K1K0K9K9m9m9K5K6K5K5M3M3q7q6J02J03j30j30
2023A470k4k4K46o3j88J20J99j12j21J89q2q2K4K4K4K4KLKLoonoj02j03P9P8j7j7j14J96L9
2020A650M0r0q9J86j24k6k7QPK7K7j41J69l8l7J61l54J36J36j72J37l7l6qqpqO0O0N4k56J55
2018A555J55o4o4j33L83q8q9j0j1j1j1rrq7q6J5J5l0K79l7l7j7j7MNMMn3n4J98j11j1j0Q1
2015A649Q0l16J99j68J41j25J83k22Q7L9L8j9j9K1K1R9k11K02j08m9K59j65j65L25j91O0O0
2013A705j45J63o4o3m5m4K6K7J23j86j6j6R3R4q1q1J20J19j73J37j34J75j18j18J53j57P8
2011A572P8j9j9L3L3j29j28L25j90K3K2N3N3k30P8r5K15k31K85m0m1q5q6N9N9O0N9j12j12
2009A490O9O9j1j1j0j1j1j0J44j65P7k32K07j03K45o5l8l9L6L6J7J7R9k11J38j72N1N1j23
2007A534J87j01K09l83J31J56j53onj32J76K3K2j34J75j28j28K9K8M8M8j41J69l8l7K07l08
2005A448K84k4q8q9KKJ94j16j92J16M3M2j12J98jjj55J54m8m7k8k7K0K1n7n7J40J39r3r2O7
2002A643O6J06m10J84j25J90j18R2R2k81K8O3O4P6k33J23J23j80J29j73J37J75j34k19R0L35
2000A843j81j54J55k12L03j44j45J07k03L72j44l4l4o2K48l6l6j42J67k00J09J45j65J06k03
1998A460J68j42J88j23M4M4k26Q2J01J01j82J27j02j02J88j21j13J97Q0Q1j23j22P7P8k27
1996A433Q4j17J92j15J94n7n7J27j82K82k34o4o5K26q4n5K54k87K28k32P7ppJ64j46m8m9J03
1994A558J03k00J09K3K4q6q6R4R4J7J7j08j09J95j15K0K0JJjjk1k1K55n5o1o1l5l5J38j70
1992A504L1L0J2J1J9J8j87J22K33k83l1l1N13m14L0L1p1p2O5O4J58j51k2k2L04m19J43J42
1990A727j65j65R2R3L4L5o2o3K06j04qpp5p5O0O1J41j69j68J41l8l8N8N9l9l9J36J35k52N8
1987A569K52k65n2n2P0P0N6N5k73L6M2M1Q0P9j94J16n9n9P2P3l15M08k16R3l6l5P1P0opp9
1985A605p9P6P5r4r4K35p5JJr6r5K0K0J95j15k7k6K25k91K50n9p2p2N3N4j60L57r8r8J1J2
1983A639k7k7qqj40J70j79J31N8N8j09j09K98k16J50j59K06j05k6k7K2K2j52j52K38p2j9k0
1981A437M00l22Q5Q4p5p5O7k43L26j91Q1Q0opj61J48q3K25k26Q4j72L43j85j86Q4Q3K6K6j42
1978A505J67q4q4%%%%L3L4L4L3K6K6K6K6j09j10M5M5O5O5r1r0qqP0O9j09j09M5M6N0N0P0k40
1976A488L6L5L6L6j34J76R9k11j4j5j37L79l47J69j1j1n7n7R8R8j20j20J58J57k58N1K06j04
1974A626NMO2O3j48j47J81j28N1N0k58K57L8L9j03j03J38j71J78j32j9j9J37j74O6O5M6M6
1971A650J7J7j12J97m41K81O9k41M6M5K6K6O4O3k65M3N6N6lkj04j03n3K57J75l41J42J42k02
1969A505J07J07k03Q0Q0r4r4P5P5p9q0P0P1J2J2k29Q0J38j72J86j24L1L1l7l7M1M1Q7Q7q7
1967A680q6J27j81m7K63Ql01J17J18J55l61j3j3J19j91J58J57k40O9L0L0J98j11o6l76M93
1965A736k29J77j32L3L2o4o4N2N2k6k5J1J1k2k1K30k86r2K17O9P0o6o6j42j42L87j29K34p4
1963A731q8q8PQN2N3J02m14J54J53j43J67j04K05j40j40K09j01K4K5n3n2p4K36r3r3J8J8j
1961A578jO7k43q8K21ONK5K5J5J5j59J50j4j4ONR0R1o5o4p4p4Q0Q1k8k8k9K82k91J8N1N1k49
1958A441K66j92L25m46K76k1k1p1p0Q3Q4n0n0Q5Q6n4l63K43o6J04J05n1n0j12J98j50J59m4
1956A644m3k5k5J2J2J2J1O0O1M7k62K72k43K7K8%%R6k12J01J00p3p3J25J25m9m9J11j98K8
1953A620k82r3M22k2k3j01K07r5r5J1J1L1L0m2K67j06j07k66K50N6k53N7N8n9n9J93j17P7
1951A570P6j82J27m6m7%%K90k25O7O8o1o1K09j00J00k09J79j29NOQ4k24K00j08P0P0k20Q9
1949A598K06j04j82J29P2k37L4L4k4k4P2P3o9K41j14j14qpK25q5m10N17k17R3M9k61K17r3
1947A611k28K88j95J13j8j8JJl7l7K1K1P9k30J05J05k65K51J54j55j27J84J44j65J17j92J10
1945A638J11k01J09l93L28M1M2p5p4K12l03j43J68K64k51J88J87j46j47K02j07l84L38O8k42
1943A430L05nj34j34J43J44j08j08J25j84n5K55j4j4NNl4l3n3n3K36p4k9k9n6n6J18J18k84
1941A427M37p8p9j42J66o5o5j94J16J9K0K4K4MNJ43j66n0n0r2K18l4l4k0k1J54j55J15J15
1939A742o6o5j56J53J73j36j73J38l7l7r3K16l5l5Q6Q5o2o3j67L48l09K06n5n4N5N4p3p3Q8
1936A655Q8k94K21j65J45J0J0j44J64j42j43L01pk83K6K07j03j27J83j1j1qqO9P0j34j34K20
1934A655q8M0M0K1K1p9p9N0M9NNNNl0l1l0l1N9N9j9j8N7N8k72L8O8O8l6l5j85L30k11R9qq
1932A572J1J2mlllM2M1j45j45K90k26L54j61n6n6O7k43K52n7J17J16k76L4r5r5M02j13R3k16
1929A506J16J16n8n8ppJ68j42PQj2j1r9r8P5P5j08K01j15J95l18J98Q2Q2j49j48K64k52K32
1927A743k83J28j80J99j09M5M5j4j3POj39J70K9K8k35K79m16L06k2k3M2M3k11R8j72J38J12
1925A601J13j26j26J36J35j94J16j11j11J59j50O5O4j10K00k36P2N4N3M9k61K23q6J38j70
1923A497J78l38K77l2J3J4P5k35R5R4P5P5o0o0j81J28j10J99l18J97Q2k28J50j59mnO7O6O7
1921A619O6m0m1p3p3K40k76K07j02L3L42l86p7P7P8R7k12J74j35K0K0L4L4j39j40K40p0J82
1919A699j27J27j82N0N0J7J8k72K43o0o0J28J27j07j06m9m8J58j52J97j13N6N6m0m0j36j35
1917A299K70K71m00L23o5o4j34J76P8P9j48j48J29J29k58N2j42J67L8L8k90K25k05J04J36
1915A660j73P0O9j24J86j50j50J28J27Q0P9ml14N1N0L1L1K7K8r6r5j99L17K7K8n9n9R6R6j05
1912A653j06K62k54N3N2K1K0o8o9J06k04J20J20l44J72jjq4K24k5l36K90j9K9K9J06k03mm
1910A535m3K67m8m8k8k9O1O1r3r4K4K4J21J20k84K5ONQ8Q8k40O8l4l5K75k41O1O0l58J57J37
1908A608j72J5L24r3r3j06j06L90j26p3p4m8K61m8m8j48J61j4j3K4K4n3n3J46J46j11j11P0
1906A679P1k58N1K4K4P5P5k38K78j85j86K40o9K08l08J89l27L31j85K79m43K08K08j66J43
1904A718J25j86Q7k23K41k75mL06j91j91L11k05J04k05LKQ1Q0j60J49k5k4J06J06k23Q6j2
1902A581j3PPR3R4k35P5O1O2Q1k29N2k58J55J55l7l7l7l7J33J34k66M3k03L13j32j33J78j33
1900A474L13Lk32P7n8n8K00j09K19k96j95J14K37p2L3L4mnN6k54L1L0L93l29j75J35KJj34
1897A431J75k00J09J09J10l8l8j8j9q9K20j47J62K5k85O4O4j10j11K38p2j42J67k7k6q8q8
1895A376J71J70N1N2k77L2J3J3J10J10n2n1j29J80j14J95r5r5j74J36L9L8j1j1l01K14N0N0
1893A690J02k08rj0m8K61j00j00llL1L0j24J86k12R7j93L23p9p8N0N1j52J58l26J90J46j63
1891A507M3M3m9m9j00K08K06l10J35J34J8k92J60J60k27Q2j31J79J6k94K28q1j8j9K14r6o1
1889A606o2P3P4r6r5L9M0J47j62j43J66j72J37J25j85L01k15L7L6J14j95kkj31J78K3K4k36
1887A424P3K67k49L0L0k2K87k84k84J99J99n1n2l8K71j80L35l80J36RRj14j13P2P2k5k4J29
1885A726j81J87j22j47J63l0l1k1k1n3n3L34j82J08m07M77l7l8l8O2O2l82J33K5K5N7N8p0
1883A604p0PPj32j32L96j20O0k50J49J50j4j4j4j4J9J8J8J9j21j20l7K72l7l7j91J18J11J11
1880A756k30P9J28l88L34K4O7k41M8M8J80j29j3j3j78J31j21J90j40J70q2q1J66j43J08J08
1878A778j59j60K86k31NMJ46J46k00J08r7r7j74N47l93q4J21J21j5j5l6l7n5K53j62j62R6
1876A534R6J55j54K26q3k47K68m15L06k72K43kjrqqqn3n3K38k79K7K6J87j22j42J66N1k58
1874A409L02pj62J47k04J05K7K8n0n0K02j08mnmmj93J17J16j93P9P9P8P9j92J17k30P9ppL03
1872A847k13l9l9Q4Q3j12j13M2M2K8K8O6k43j5K95l82L40p1p1J48j62pqJ47j62P9Q0k30K85
1869A727j62j62J28J28o5o5k0k0L38j78L6L5k3k3k2k3L8L9N8k52L8L9L8L9p4K36l63J52j57
1867A460J52o7o7ONQ3Q3j20j20J76j33L09k06K00l15J45J45k16R3k6k7K82k33j4j4K44k72
1865A553k5k5R7R7q6q7O9O8j07j07M54k68M9N0k48O3J23J23j54J55l46J70P3k36R0R0o5o4
1863A506j62J48k6k6J02J02qpl33L88Kl07J14J14k34P5J30J31onn5n5n5n5K03K03l45J70p
1861A702qm65M63l07K09j98J12mmJ5J5J0J0J1J0J8J8J14j95J05J05k43O7K6K5j2j3r5K15j34
1859A572J76m7m7k98K17j71J39J90j20j34J75L9M0ml13J5J5J16J17L2k77K2K3J97j13n4K55
1857A762r3r3mnJ31J31M0k69l7l8J29j81J48J48j12j11rL01k84K5J28J28q0q1lmK8K7J4k95
1854A441K40k75L24J5j19j19J13j96O8O8M8M9QQj65J43m9n0l1l0Q0Q1p4p4MMO2O2j3l23L99
1852A699j17N6N6j69J40O4k45J35J35k68K48j20j19J20J21k28Q2J32j77j19L97j64j65J26
1850A620J26q9r0O6O5p0p0k05L10q6q7J00J00m2m2k2k2j18J91J8J7O9O9j05j05J15j95J14
1848A632J14k1l30K76l4p9q0L7L6K03j07k9k9J44j65j65J44OOOOJ61j48n1n2R6R5J27l88J37
1846A548J37n0n0L0L1j44J66L4L3j02j02p3p3Q2Q1Q8Q7o7o7rrrrJ6J7J58j51K48k67LLL8L8
1843A656k20K95j97L18k88K1J39j70K3K4J6J7K68m54M2M1K03j07k27K88k2k1j1j0k23K92N6
1841A749N5q6q6J03k05K96j2k22k22J19J20M9N0k41K75j66j67J24J23o4o4R0R1N5N5k9l38
1839A452N4N4N4N4k47O2K17r2L3L4q3q2J25j84J06M15n09PK84k32P2P1j35J75K7K8k44K73
1837A789l7l7j60J50j93J15J16j94K03j06M8M8j19j19LLK04l13K68k48J34J35k27Q3N8N9J75
1835A838j35o8o9Q7k23P0P0J48j62J39J38j39j39N0N0J01k08j61L55j48J61R4k16k2k2N7N7
1833A703k34K83j43j43M5M4r8r8J41J40k0l30M89k33K07j02j48j47L43L3j54j54J03J02p2
1831A557p1K34p4n6n5N3N3q8K20k38K77k12R6j89L26k73L6k3k4J70j39M9M9k15L00l76L45
1829A732m8m7J29j80J68j41J3J3k5k5J61j49j48J61L6L5j19J90r3r2j90L27k51N9k31M90j35
1827A640j36K38p1r1r1M5M5R5R5j95j95L40j75J14J15l0k9k03J06M1M2o8K41m24K98q9q9N2
1825A621N3k37K78n2n1l9l9J73j35L8L8m3m4m3m3J20J21L8k73P4P3N4N4k6k7ppj93J16J35
1822A727j74j54J55n8n8K30q0j96L20k8k8K3K4j83J26m8m8j0rJ45j64J48j61J86j23j03K05
1820A664J3J2k6k7k7k6k7k7k6k7M0M1q9K21k24M97l40l0Q4k26J55J55k43K72k69M0O7O6o8
1818A625o9n0m9J05J05n0n0K7K7n0n0K7K7M1M1q8K22m23K99q7q8J01J00k34K81k55K60j26
1816A619j26J06J06mlj68J41j29J80j08j08M0M0O4O4q4q4J34j74J73j36m1m1L26j89n9K51
1814A790k07k08L17Pl1l2k03J07J39j71j43L73k21Q9k22Q7j44J64L51j64j57j58K76l3qpJ2
1812A603k98L99j17llk41M80l35k5K84k32k4K86k69K47j39J71r9j00M3M4P5P5k89K27l53J62
1810A569M8M8J25j84qrp3K37k03k03M74m2k93K23n5n4J72l43J28J27j2j3j87J23p2p3P6P6
1808A602l5l5J45l70M53o3L4L4l32k2K10K09k20R0q5q4P2P2O5k44O4O3l9l9k27M96k78K38
1805A774j77j77J39J38m5m5l8K71j87j87M5L54l7l8j92J18r1r2K5K5J86l30K50k65J27J27
1803A678j57J52n4n3j6j5p2K38J73l43J33J33m86K36J40J41r7r8%Jj73J36P1P1j61J48o0n9
1801A607J8J8J11j98J95j15K08l07J17j91K30p8N6N7O8k42J07k03J02J01o5o6J37j72J75j33
1799A537l7l6KL11p2p2J60l55Q3Q3N1N1p5p5J25J25j93J15l15J99k40K76O2k46J08J08p2p2
1797A536L08k08p8p9o4K44Q4k25j89J21N6N7k2k2J53j58J1J0J20j89L37l84K34p5N9k51J36
1795A522J36p0o9J62j46Q0k29K29q1Q5Q5j27J82Q0k29J38j71N2N3m90M39Q5Q4k12R7r1r1N8
1793A561N7ppJ86j23j69J41q5q5K31k85m0K70L4L4o9p0L69l52Q5Q6k96K19k44O5N7N7m6m7
1791A527L58l65O1O1j13J96K2K2j71j71K99k16ppN7N8j53J57j92J18J3J3j48L68k41K74k86
1789A534K3Q8Q7J46l70K40o9j2j1j96N25m22R3Q6k24J38j72K29q0J6J7k09J00K10r9l27J89
1787A530j14J96K4K4M3M3q9q9O6k44L05nK1K1j3j3k26K90j33j33m3K66q1q1M7M7l1l41L74
1784A661O5J33j76j00r9O7O7j66J44j00K08r4r5J97j12o7o7J43J42l09K07j26J83q7q8Q3Q4
1782A698j69J42n9n9R0R0l1l2j92j92L80j36J35J35N0k59J1J1K56k59j4j4k67K49J19J20k93
1780A510K23q7q6J51j57J90j18o9o9K79k37J09J08r8K11j54j55K38p1J94l23n1n2K8K7L24
1778A865l98K65k51K13r7J87l28M0L9n3K57o6o5R5k14K5L34M5k63Q4Q4j03j03r0K19k71K45
1776A695l35J80J67j42K70l9k63K53j73L43l35k6K96m25J84j26L6L5k48K68j00K09q5K24j88
1774A675j89J34J35J34l81K74k41O2O1J36l79M6M5J44j65RRNNJ79j30N8N9k13R7L1L1q5q5
1772A461L0L39l38J77k64M57k26Q4k41O9J66j44J06J06q7q7Q9k21L7L46j67j66J30J30j56
1770A630J55l30J87J11j99Q6Q5r3r4Q0Q1k19R0K45o5l9l8n9n8K0K0j35J74j35J75j55J56j4
1768A662j4K5K5k55N4K53n5l57L65m1m1j84J24M8k62J42J42n2n1M7k63L24j92K88k27L00k14
1766A591R8k12K40p0Ql02K85k5j8j8K33k83J85j25kkJ72j38L7L6M1M0l46L75k04J05k4k4l5
1764A618l6j5j6r4K17k48K67q1q1j78J32j35N88l28J88j87J22p8p7r2K17k47K69J4J4j08j08
1762A537P5P5j63j63M8L58k81K35j3l23K32p8m3K65k37K78p6l85L69j47O9O9L7L7j56j56j5
1760A448N01n78N56m37K85j82J28j57J53j88J22l4l3L9L9j93J16o3K45o3o4O5O6j09j09J12
1758A665j97N4N3N3N2P2k38J32J33l19rJ20J19j19j19J52J51k81K9O1O1LLj2j2j22j21L39
1756A703j76Q2Q1J05m11N43j79j15j14R8R8%%l3l3Q8m27N07k15R1k19K78k38L2L3K52n8n9
1753A714n9p8p9J0J0rL00j32j33K16r4LLj6j7L7L6j38J72l8l8j8j8J6J5M9m68J42J41j80L35
1751A684k9k8MLo3o4R1R0l9m0l62J54K95k20J02J02M9M9l25j6M29k92m2m1J60j49K18r1l8
1749A591K71k31P8j95J15N7k53qqN0N1J89J90j01m09J47J48J28l87K42k74K36p4O6O6j46J63
1747A702O8k42m8m8N8N8L9L9R6k14J15J15q2q1P3P3q0q0LL13k63k64J16J17J6J6M9M8k78K36
1745A670n3n3N6N5m1K68k38k38L29j86j7j7K8K8rrM9M9J48j61o4o4P1P1P1k38K03j05k41K74
1742A636J4J3p7p6j17M00m6m5q1q1R3k16J53J53n3n3R7m19M06R7ppj04j04J3J2K57k58k19
1740A381K97m5m5J24j85K60k56J87j22K0K0J%L3L3k27K89jjj78j78M79m49K41o9j27J83NO
1738A676P6m39Q4L93r0r0Q9k20kjL42j73n7n7J91j18K4K3k97M24j04j04k27K89p8K31k13R7
1736A669P0k38L55l66KJK50o0k15R5N4N5J6J6k95J4M7L56k53N6j62J46q1M34l78L44k56N4
1734A730K2k88O8O7M8M8n7n7n7n7J61J61j49J61k05J04j67J43N5k54R3R4j63j62L01L02k77
1731A665k77L87l35L4L4n0K59N6k53kkJ07k02L01rj25j25M54m73Q9Q9j43J66M6M7n7n7k40
1729A384K75j69J40j38J72l56L66j93L24l21J95l12M10j38J71p8p8p9p8J51j58R4R3j00j00
1727A477N4N5K8K9m9n0O1O0j07M09o30R2j2K99P4k35K28k86K26q4k12L03j80J29j86J23k6
1725A590k5opK8K8K8K7j9k0J74l42K57n2l2l3k51K65N2N2j04j05L2L1J58j52M3k68J81J81
1723A711J74n48L52j63k28K88J51j59k9l0Q6Q5o9o9k6k5J48J48k57N3j41J68J45J44l00RJ98
1721A816l18O9O9k8k7Q2Q2k48K68k79K35l07K09l0l0j33J77J58j52J68j42k77K38J16J15k83
1719A548K5j32j32K48K47q6q7j06K03l9l8j93J16J48J48k13k13K37p3J21j89K9K9Q7Q6k08
1717A563k08L27J8j4j3l3l3R0Q9l74L47L90n38K80m42Q5Q6j8j8j89J21j89L27N0M9l62J52
1715A543j9j9R1R0q2q2R2k17J56J57KJj86J22k31K83l30J84n3n4M3L53k53N6o4o3L3L4O1O1
1713A709J5J6l14K01j1j1J9J9J36j74m2K67rl19MNj4j5Q0Q1p5p5J19J19j78J32k87K28J32
1711A758j78J19J19l32k3L2L3K26q3l5l5j71L45k81K8K14r4J0J0q7q6J0J0j44L71j7l27K28
1708A620q1r0K20j60j60L38j78J32j78l5l5M62k61k84K31L1L1J78j32M3M2k6k7k7k7j7j7K7
1706A620K8J10m06R1M00k21Q9o6o6m0m1K89k1m1m0R5k14O3k47J98l17J92J92K4K4k14R5P5
1704A651k33R4k15N00k22jjj23J86k39P0N2N1K41o8j46J64j52j53J25J25q8q8RQj16J93J9
1702A643J8kkj76J33LKK1K2m1m2k8K81l35J81j86J23J07J07l06ML5L4QRk06L10L9L9k70M0
1700A565k69K46J43J43k57N3m1m2n4n4L05k11KKK30K31m21R4r3r4K48o2Q6k24q8K21n4n5M2
1697A592M2M5M5k26K89k39P1J41l74m1m0M69k52J80j28k0j9J02k08J20J21n0n0l1l1j29J81
1695A560OOllllJ24J25l20J96j2j2n7n7O9P0Q8k20M5M6K5K6l3l3j4l23K02K02K8K8q9q9M7
1693A622M6R5k14J33j76R3R2K09l07j1j1o2o2K42o7J20l95L10JJ42j66Q7k22O8O8K23q7l5
1691A736l5k07L08l11jQ6Q6o9o9K07j03P1P2j64j64J64j44J41J42l23J94RRJ06k03K67k49
1689A556n5K54j31J78n4n4n1n1n2n1L4L5k4k4M55m73O9O8j25J85j64J46l4l3l4l3J15j95Q9
1686A546Q9J65n57K29K29k12R7K0K0j28J82K01l15J53j57l4l5J78j32M1M2M9M8k61M8qL01
1684A799j12j12nnnoJ37J36j92J17q6q5Q8Q8j16j15OPK78k38j23J88J3J3k77K39M2k67J97
1682A604J97q2q2j01j01J79j31O3O3j81J29J47j61j75J35R6R6O8O8q7q7r3r3O1O1J39J39l90
1680A481J26r6K12j15j16K93k23K42o8o8o8m2m2k13N09j55j55o1o2P4P4J68j41N2k58J72J71
1678A691llo9p0J23j85l4K75k79L0L64j52MLm2m2m2m2K3K2M2M2p4K35k99RJ96l21K47K47k36
1676A660k37M28k95m0l9K63m7m6K63k07k08K30q0j5j5l28L95k06J04K51n8l68J47j87N34k84
1674A615K31j04j04r2r1K60n0k04J05N6N7j11j12L53j62j31j30J09J09J28j81O1O1O1O1k66
1672A529M3m6K62k40k40J73J72k63K53j9j8o0K50o0o0n4K56o15L14K08j02j99J11jjj36J73
1670A630j46J63K8K8j06K03k61K55j32j32P4P5k15R4r9K11J20J20l76J40j37L78o78K49K56
1668A742n3qrK91k25r0r0ool8l9K44k72L8L7N0L60k65M4J47j63j43j43K18r1r2K18p5p5p6
1665A430p5L02qJ79l36J78j31J1J1J01J01q6q6K19k97J49j62J84j26M8M9j58J52llj38J71
1663A676llPPj09K01m96M33p0p1l9l8K51k65J13J12j77L38l86J29J30J29j77j76Q1Q1K7K8
1661A733j60j59K72k44K02K01j32j32K2K3l9l9K32k83K92j6j33j32L1L2L2L1k6k6k6k7P1P0
1659A670m52M77m4m3J89j21q2q2J95j14J61l55L61j54q4q4K33k84J61j48K45o4qqNNj97L18
1657A696k3K86n06K15l26J89J82j29JJN7N7k52K63J21j88O9k40n7M59m10L10j19j19Q1Q1j84
1655A515j83L32K3O9k40J73J73k21k20J40J40m5m5j93N29j87j86J67j41N2k58J94j16K96k19
1653A549K65k51K2K2J83l32J22j88J41J42k50K66k17R2J80j31J99l17J58J58l19J96p4p4J13
1651A655j96J94j15k50K65K2K1m2m3L25J6k42O8O0O1k29Q1k32P7m5m5M30k91N6N7j34J76R9
1649A799k11k2k2r4K17J82l34N3N3N8N8l55J61j38L78j77J33k96K20ool00M21j20j21j07K02
1647A626O0O0k18K97K7k83M3M3k09N13k83K7N2N3r6r6p7p6o1K48k35K80Q7k22l6K74j16j16
1645A566L9L8J55j55%%J48j61J3J2o4o5R0R0q2q3K27q2R6k12J9J9O9O9k60M9O1O1r4K16p6
1642A703p5J18J18j78J31P2m42K06j03PPK77k38j23J87P7P7l16J99k46K70j42j42O5O5R7R8
1640A769k22K94j83j83J92l23J22J21R3R2l52J64l8l8K52k64J65l50M68k54J8J9J08J09O4
1638A843k46Q3Q3j55j54%%J61J62m00L23OPJ55l61J58l57M29q7J28j82k0k1j00K08k56K60
1636A667o2o2l0l0M4M4K5K5O9k40O9O9J76j34M0M0JJj74J36o0o1K04l12L70l52j13M02r3r4
1634A565J12j97J23J24J56l60k08J01k2K88j33j34M34q2k07k08K76l3J95j15j67J43J95l21
1632A525J62j47p6p6J62J62k2k1k2k1k8k7J47j63J2J1m0m0K34k81J82j27jjj56L60p3p3p3
1630A489p3K82k34P5P5q5K24j05j05M0M0P3P2k57K59l2l1n5n4k47O2K33p6l7l7M6M7M6M7j40
1628A542j39J18J18K5K5j11M05k44k45M6M6L2L3K26q3j87J22J03k07O4O4j09j10RRJ25l91
1626A286K60m9o2K48j90J19l5l6k2k3L65l58K15r4L24j91j65j65M66k55o5o4r7K12k48K68
1624A644k74K41k5K85o3l73J88j22L4L3J07J08j89J20l63J52K11r9O5O4j29J81k3k2j07m15
1622A229M79J70k10R9n5n6k29P9K06j04Q9R0P6P7l56m5n8n8Q5Q4K63k53R6R5p6l86L55j60
1620A526l0K79k9l40L38K7n6n6j49J60r2K18j78J31j33j33K02l13J31J31m0m1k1k1j63J47
1618A495K62k53N9N9j08j09O3L72m54O3J10J11J75l40O1O0K22k93Q5k24J75J76m9m9llk16
1616A447N06l32k2K3K3M2M2o8o8Q7Q7l0k9l77N51k46O4p1p2J70j39J6J5J02k08J40j69m6m7
1613A391N53n81K66m3Q0P9k25Q4q9K19j47J63q9q9J43j66J17J17l66J49j9j8L29j86noK01
1611A862l15m4m4J74j36K12r7n7n7N9N9Q8k21J08J07L2L2j22j23K3K2j51J57P5P4l70J45K05
1609A697j04n3K56k45O3J15j94K49m73M75k48L8L7K82k33j27j27K02K02j03j03R7R7n67J55
1607A388J43J42l37J80J1J2M17r7k53k53M1L51j53j52l6M79k23Q6k72L8N7N7r9K10N5k53M
1605A543MO3k47K71l7j15J94j62J48l94N34l7l45K34p5r2K18k1k1k79K37k46K69m0K70k85
1603A589K31l60J55j22J87p6p6R7R8o4o3J42n79N25j98K99k16n1n1N3N2J64j46o8o9K81k8
1601A706rrM6M6j08j09p0p0J87J88j39j40l6K73k76L3J88j21J92j16m0l9P5P5k15k15L60j55
1599A502J02J03J51l65O1O0N9k50L49j67J48j62J35J35j65j66N12q29K74K75k22Q8m8K60m8
1597A792m8j00j00q7K22j95L20k78L0O3O3p3p2L7L7j76j75O81k46Q2m33K65m4J36j73M0L49
1595A917k76L3r3r2p3K36j57J53j83L33J52n69K29K30k02k03k8M88l19l19L12L13l05K11k01
1593A587k01N04k16l59J57R4R4J65j45j78J31l0l0q0M36j12j12N0N0k01J08j0rJ0J0N7N7k39
1591A588P1k73K42O9k41J4J4J49J49j81j82K51n9J1J2J08m08K29q1M2M2J85j24J27J28j68
1589A714j68J61j48P7P6r7r8J54J54l88L34l53m5L81P2k80L0K62m60N58l70O2O2k86K30o1
1587A573o0P4P5o1o1j80J29K45k70J18J19q7K21j58j58p5K35N4k55K99j1k42K73j14j13O0
1585A630N9l7l6J59j50L15k02j19j20k68M54k46K70K5K6p1p1n1n1j09K00OPO0k50K98m24L59
1583A663j56Q8Q9p4p4K9L38k19R0o5o4J9J9j%M3k67Q2Q2j22J88o3o3j%J73j36j01j00K08j00
1580A505M4M4K5k84L25J7l58L64k38K77O4O5n65m9N19Lr3r2k8k7rL01j50j50J97j11J20J21
1578A837n87L42P1k38R8R9J18j92j8K91k31P8n2n2J22J22%%n7n8j56J54k01L14k38K78l67
1576A477J49Q4k25J55j55J00J00p5p4l1l0K7K7J87j23P1P0j66J43l0l1nnJ30l85K35K35l58
1574A497L64r0q9L2k76J94j16j73L42j01j01Q6Q6jjl3l3K92k23j85J25J23J23j16j15q8q8
1572A435J90J89k96J4K07l08J95J95k82K33l8l9J3J3l63n4L40j76k3K86j71J38j25j25K9K9
1570A506J25j85J63J63k74L5J57j51L25j91n5n5jL09n29J93p4p5L58l65K87k2o8o7Q7k22J06
1568A480J07PQj2j2J59j50M2k66J67J67j10j10O4O4O4k45J79j31J97J98l67n9J80j29J92j18
1566A566J15J15j08j08j1j1j8K92j40j40R4R4j13m22M53J44J06m11J38j72P3L82m10j01K28
1564A635K28k59N0m6m6O7O8j0j0N1N1j04j03O1O1k68M1R7R6OOl23L98qpp4p4j12J97R6k13
1562A552K12r7L3k76J56J56j81J28jjk92M29l4l5k54N5j71L45R8k11J5J4j44J66rqn1n0K40
1560A784k76K52K53k44k44J3J2J2J3K6K6n1n1J25J25m36K85r3r4M41m87K97k20J87j23PPP
1557A553Op3K35n44N90j98L18l14mj05K05j04j05J74J74l54J61j25J85j43j44L62j54N9N8
1555A713j44j45J33J33j40J70l33L89o4o4J%k12R7J43j67j70N51j12j12k40O9J86l31J94J93
1553A738j15j16K54n4M2M2n6n7k30P9J00J01j77J32j53L63n01J5L69l52J44J44J51j59o2o2
1551A580j16j16K32p7m3K66k56N3K5K6K19r1j71j71O8O7J59J59L7L7k73K43k21Q8k4k4mnl3
1549A634l3J40j69P1P0k98J2K40p0J74j34L04m17J63j47lL06j45j45l7l6R8R9J9k89K51k64
1547A394J81J81k00J10J36j74j93L23o6o6j37L79k84K32l35k5j05K06j56N66n33J89P9k29
1545A473O4O4l2l3QQQ5Q5j58j59L06ml66J49J17J17q3K27l34L87j94J16k65M4P8P8k31P8J02
1543A727J02j4j4k45O4j10J99j04K06k07L09l42J74q4q4M8M8M9M8j63j62qpj8j7K79l0J26
1541A770l90K94j6J26j83q7q7M90m38Q3Q4N8N7R0m25J96J97j13j13J96j13r4r3J27J27j50
1539A593j49J04k04M33q2j60J50n6n7K1K1N3N4l05K10R5R4j99J11m4m4j64J46k8k9O2O2k28
1537A460K87m5m6j3j3j3j3j87J22J6J6L5L5N8N8r7r7O2O1j12J97j70j70L00rj78J31m2m3j6
1535A574K92L5k75M9M8j25J84k52N9J74l42J95j15N9N9k06L11L9k70J88J87l67n8P8P7R7k12
1533A483J52j57J20J20Q4m31J17J17onl8l7L26j89n3n4N8N9r7r6M5M6O5k45K28K29j84j84
1530A473K70k45K38p1q5K25j04j04j55J54K50k65J15j94J02J03J5J5L5k75R3R2R3k17r4r4
1528A370M34q2j09j09J3J3M8M9k09L06j76L41l18pj11M04l11K05j36j35L8k71N47L2k33P7
1526A670o6o6J27j82M3M3j50J60J3J3J48l67K26q4k32K84M3M3p9p9L0L0L0L1J72J73k27Q2
1524A829m30Q5P3P3R2R1o2o3KJj85j85L66j50J59j50POJ61j48J4J4q2q2Q2Q2p3p2J04J05K7
1522A691K8M1M2r3r4k6K84j29j29k9K80l19J96j94J16n9n9J91l24O23p18L55M7j9j8l8l8M6
1520A654L56j97j98l19j1O23r9j37j38L8L8J93j17J08k03p9q0K95k20M17l04j00K10j45j45
1518A440m9K61o9o8J45J44l20j0L10k06K39k76J3J3N9N8n8n8j23J87k28K88j95L20j30j31
1516A556L7L7M5k64L41L2j43j44R5R5j21j21j7K91j54J55j74J36m8m8k02J06M3M2J6J7K71
1514A879m51J10J10qqJ66j44j34j33J88J88J28j83J28l89J5J4j8K92j83J26k8k9K0K1J74j34
1512A717J16j94p1p1K43k72K69m1j23j24r2K18L97j19j90j90J87j23L1L2J83j26j07K03j73
1510A580J36j8j8K0K0j73J37J09j99opooJ68j42poJ03k06L38l84J77j32J42J42N7k51j11J98
1508A655r2r2J96j13L44l77j50L65o7o6J02k08M4M4J18J18k62k62L82P4M1k69J25j85J44J44
1506A753k26Q3L34j82M8k62KKK71k45K38p1k80K8K3K2j50L66r9r8J22j87M5M5J58j51K3K2
1504A634J63J63k17k17K40o9l08K08k14L02l4l3n1n1K7K7k0k0M64k59l0l1r5r4J95j14N9k49
1501A376J57j53L5L4L33l90M23k99K1K1j92L23P7m38L16OJKj47J62K13l03j49L67o3l72M14
1499A775j02k37K79j86J24k43K73k69K47l57m8L59j58N4N4r5K15Q7k22k8k9M1M0K8k82M83
1497A803l2j9j9j19j18m1m1N7N8K31p8p0p0p6K33l34J82p0p0K8L37k69M1J02J01k39k40J80
1495A448J81r7r7K43o6P6P5J55l61K6K5j03K06j22j23J24J24k43K72m8m9l5l6J77j33mnK48
1493A858m75J89J90j11j10M4M5m9m9P3P3K28k89j7j8Q2k27J72J73J3n03K71K71l49m1J47J47
1491A738m3m4j20j21O0N9J18J18j1l21R2R2J93j16L9L9Jl09m4M71k92J7j25J85o4K47l34J82
1489A707j39J70j06j07j59J49Q5Q5k82K34n7n7O4O4j3j4p6p6K52n7l3l2p2p1K04j06qro7o8
1487A405Q8Q7m8m8M9M8j38J71llj14j14J44J43q3q4K26q4J31j79q9K21k67K48llk18R2P3P3
1484A721j0j0k9K80k23k22N4N5l2l1n1K58r4r5o2M53m63K59p1p0K47k68j52J57L8L9k52N8
1482A484p1K39Q3Q4j42j41Q4Q4K39k77j9j9J88l27n7K53RRK22k94J63j48J69j40N7N8j17j16
1480A557j3j2J61j48PPl2l2K62m8J78j32l26J89J5J5J03k05P8P8l43J73L7L8j6j5j6K94j61
1478A693J49j61j61j0j1L95l27k7k6J14J15k14L01l36k8K44o6J79j31l21J94L9M0p3p4J01
1476A598J01j59J51k4k3k4k3k3k4j5j5j51L65%Jj02j02q0K31j44j44M51k71J03J03m60K62
1474A582J65j45M3k67J07M16l59J56n6n6J09j99J48j61O0N9R9R8m81M46R8k11NMj5j5J01J01
1472A832k27Q1j06j07J12J12l95L27l4l5K76k41j24J85j6j6j6j7J66j43k79K36Q6k24j8j8
1470A397K07K08m56K65R5R5j18j18m5m5K51n9K87k29k81K35O6m51L23J4q6K23j25j24J65J65
1468A859j64J46j12j12O3O2j15j14k30M91l40J76o9o9J13J14l89N39k62M8P3k35K34k81L57
1466A783j58N4N4M1k68L5L5J70l45M92m35L05mj74j74L54j61o9p0K28q3p6p7N9N8L5L5m3m3
1464A558onk5K85o0o1j56J52K12r7j81j81K68m1j76J33j75J35k1k0Q6Q6k10R9j31L85m0m0
1461A773j50j50J98j11oL04k18k18r3M23j24j25N8N7L47j68o2o1j27j26L18j98J38J37m33
1460A383K89j17j17K18K18m46K76p7p7M6M6P9Q0p5p5JJj35L81q1q1l39J76q9r0J30M39j58
1457A806j57o1o1L4L4L4L4j5j6LMj32J78j6j6J28j81J2J3j01K09L5L5j09j08j41L75p7p6o3
1455A604o4K80l0j14j14Q4Q5j48J62k69M0K14r6J13J13j65j64j9j8J56j54k8k8K23k92K27
1453A598q3N9N9OOO3O4rl19J65j45L07lq6q7j12J97p4p4J33j77K9L0M30k91m0m0R4R4o1o1
1451A672n4n4K35k80J54J53l23J92j3j2J16j93N5N5j96J13j0K99k36k36K46o3k18R1J46J46
1449A785l64J53j51J58J53l64K68K69k99k99O48m86J84l31K34K34j98J11k66K50r8r8n5n5
1447A383L13k03Q2Q3j05j05J02J01M30k92m4m4k18R2J85l31K69k47O4O4L2L2n0n0j53L62j61
1445A591L54m71M5J70j40k62M60j12j12J07J07j62J47k6k7p9q0j5K94O1k48J78j32O3k47J66
1443A630J66n6n5q9q8K57k59jjL02k14P6P6q1q2o2o3J1L19j83J27j19j19P5P5j75J34NOl43
1441A269L80j56J54m50K72K34p6j98J11K85k30K9L0o1o1j82J28L1L1J29J28j48j49K93j7k42
1439A534K74l8n54L23J4j96J14J7J7k5K86K7k82J03J03l03K12J08k01J01J02q9K20j91j92
1437A484K9L39k80k80Q4L93l41L80q1q1l6l6K2K3K2k88K31p9R5R5j40J69k62K53k15L01l44
1435A457L78k30Q0m9m9L6L7R4R4j47m57L69j48L6L6Q1Q1k3k4j27L89l71J44M1M1j01j00N4
1433A622N4r0r0O5O5OPr0K20j03j03poK2K3M2k68M4M3rqL30j86J43j66j52J58J20J19j27j27
1430A551R2k17K63k52J74J73j11j12K94m28J76J76k17R2J16j93P7P8p4p3J33j77j88L28j56
1428A525J54p2p1J67n55N12mo8K41k95J3K07j02j36J73k1k0o2o3K08j01j06K03L0k80J16J16
1426A709r0r0L42j74l15oJ15J15m0m0J86j24P0O9j72J37k69M0M37m91Q2Q2j68L47k71L8j7
1424A502j7M7M8k86M36j63J45J01k08j6j5J4J4J3J4k0k0J03J02l88L33j24J86J13m03O1O2
1422A634n2n1L54l67R8R9k56M65l04Mj5j4L04m18K40p0PPl3l2J62j48k0j9j57L58J07k02j27
1420A554J82j0j1l2l3j3j3j54J56j7j8J1J2o5o6J26J27l06MJ64J64k68M2K60m8j13j13J64
1418A686J65r4r3l4l4L73l50O6O5p6p7Q4k27p1K38m4m4j2K97l47J69N2N3j72j72J89J89k01
1416A578k01L47j69O3O2j25J85l04OJ99l17M12J03j55J54l14K01l60J56Q2Q3n9K50q5q5k01
1414A506k01J30M40m69M7Q0L90k55N5l70J46L39l83K68m1k79K35M8M8p5p5J24J23l27j9L04
1412A789ol41L81l65J50Q6k23N90n45R3R4k00J10j42J67n1K59m25K96l21J93p0K39qql23J92
1410A611p8M37l56m6J40J41l24L99j61j61j67J42J55l60J03J03n1n1K45o4J04m12K20K20l2
1408A757l1k45K72q9q9K0K1j34j34J23J24Q3Q3m0l9l42J73J8J9K18r0j04j03L21j94J16j94
1406A520k8k8Q8Q8P2k37J11j99Q2Q2o0o0j65L51j6j7P6P5o1o0p5K35j91J18J4J3j74J36l61
1403A329L61j22J87n0n0k43K72P2P3l60J57O1k49L06mk03J06Q7k23J%K26k89L64l57L65N5
1401A872j71J39l26J90k49N9l1K79J20l95rrJ08J09j4j3k41K75l5l4J52j57J91j18p3p3K36
1399A782p3q5q4k7k6J34J34j23j24j7j8Q0P9j66J43n1n0K11r9O2k47K61k55M60m68J16J15
1397A664l9l9N2k58J74J73n3n3J01k08J65j44J0J0J55J55j03j02j5j4j5j4n1n2K97j3j53J56
1395A786q2q3k51K64k6k6n3n3K56n3J05k05K7K8j0rk03L12o1K48m41P4P7P6m5m6j1j0L96l26
1393A655n8n7N2N2j46j47M99m30L55j60ooO3O3j23j24K59k56L04k11J33j76J21J21j11j10
1391A556K19r1K2K2m04L19RRn5n5l00M22j58J51j74j75K76l2J5J5j58L57ll12K03j06J02k07
1389A467n3n3R7R7K14r7j99J10N2N2L2k76L35l86M21l01O0O0l5l4k2K88l12K04J52j57l37
1387A379L84j95j95J04J05n1n0J18J17o9o9L69j47j14j14Q1Q1p3p3P5P5q0q0R1R0j10j09L80
1384A920l41R6m18J86J87j22j23K88k1R5R5k58N2L2k77J87j23J87J87n4n3K30m92L31l92J24
1383A523J24l6l6j32J77p4p5K16r4j16J92k58K57k02L14r9r9O5O5j09j09J06k04K79l0J31
1381A776j79Q6Q5j99L16j48j48J61j47M5k63J42J42j66L48q5q5l4l4j70J39P4P4l97J17J05
1379A555J05k80K9J33J32l3K76k59k59K63K64k53K64m41P6j31J79K75k40l56J59n0K60j66
1377A502J44k82M40k75L4M6M6j21j22K61k56M03j14l3l2q5q4K04j05j25J85R0k20L35l87L65
1375A814l57l75P58q7q7j25j25K98k17P3P3o8o7q7K23o1o1J13J13k1k2j95J14r9r9P5P5m0
1373A536m0J02k07M25r0k51N9M8M7k9l0J41j68M5k65M84m43M0L49n7n7J17J17j54j54R7k12
1371A450J22J21r7r8M45k76m5m4K10r9j00K11j05j05O9O9JKm4m4k41K74J13j96k63K53j59
1368A424L56k68K47j20j20L91j25k67M3Q2Q2k2k1l13K03j0j1j3j4J61J60l34k5K33p6n2n3
1366A538L2L41k87K1K2K2j1j1J63j47M4M3l82L40n1n1J3J4m5K65l35J81k73L7J52J53m7m8
1364A693m7m7l9l9K32k83K48o2O8k42K75k41L20j95p6p7K53K52j48j48L9L9j68L48m89K6Q4
1362A576Q4l8l9l2l2L94l29j22J87l2l2K6K6K6K6o2o2k9l0q4M31j17j16PPj66J42kkJ91j18
1360A679K8K8l52L70k97M24k46O4j52J58LKK9K9l46L77l99J16K84k32K45k71l2K78r2r2n4
1358A549n3j5K95m98O36l80p1J16J16j83L32q0q1j78L37o10L18j17J92P7P6j01j01j21J89
1356A644m3m3j98J12N4N3q1q2M4M4M4M4n6n6L18m04L01k14L1L1l0l1N50p91M17J08o0n9l6
1354A611l6k87M34j13j13J06J06q6K24ll11j53L62j02K07j37J72j57j56J30j80L05k12j10
1352A501J99qpk6k7n9n9K57k59O3O3k01L15j30j30P2P2P2k37K72l8Kl09M56o0j31j31q2K27
1350A677j22J89q5q4Q9Q9o2o1q2q1K37p3j69L47l72o3L4L4J86j24P1P0j36J73k07J02L09k06
1347A680n2n2P5P6j57J53k79L1L0L1j9k0K39k77L50j66J11j98J46J47l37J79K2k88J76J76
1346A777r5r4j14J95q7q8M2M1L40l83J01k08J35j75J55J54k04J06J0Rm8m8o7K42o7o7J58j50
1343A570k66K51J8J8Q8Q7l25J91l01K14J31j79J15J15j95L21j04j03n2n1O4L73j22m32M35
1341A861q1l77J39K03j07J7k94J82J81k83K33K3K4j51J59P8m36L49j66j92L24P9k31J22j87
1340A469J2J2L04k11P8P8j13j14j7j7m1K68o0o1M5M4J60l55J54j56K76k39Q7Q8k35K80j06
1337A630j06j25L90j05m14M57k66J18J18q2q2N5N6N5N5n1n1k44O5J59j50M3M4L3L4J4J4O5
1335A729k45O4O4P5k36K16K16l17rL7L47k76K40k04J04n3n2j5l23K47K47m24R2R0R0k78L2
1333A458q6M30k73L7J5J4m3m4Q1Q1k10L07m1m0qql7l7J05k04K27k88J04J05L00k16llm0m0
1331A643J8J7l35N93j86j87J2J2L1k78K31K31k20R0j19j19P5P5j12J97MMJ14j96kkj43J67
1329A615k7K83j41j40p7p6K65k51K27K26m16R9J19l97N62l67J24j86K33p6p6p5J17J17l7l7
1327A608J00J00k02k03L86l37K38k79L31l92M14J05j45j45j0rmlJ25j83L86l35l22L99k44
1325A379K71j47J62J0J0j89J20K76m46m0K70J2J1m6m6q7q8J0RqL01l57L66p0p0m5m4P5k34
1323A365K16K17k78L1l3l3k15L01J0J1J4J4N9N9l44L78rl18K2K2j7j6K05j03j04K05m5m6J48
1321A716j62N1N1L2L2l5l4l4l5m0m1K88k2j39j40J6J5j20J89J5L25l36k6R6R6j60J49j02j02
1318A543k0k0m0K70l3l3n9n9r2M24n10K11j21J89k69M53j08j08J37J37m81K42n5n5k02L14
1316A655J21J21k45O4l2l3k9k9o1o1K01l14N55j66m7K63k14k15J00J00k87K29R5k13K24q4
1314A698n36L92L15Ok59K57k85K5j75J35N7N7n5n4K74l5o3o2l53J63o5K43J03k08J73j36J93
1312A805j17j02j02L4L4Q2Q2k79L0K03l13J51J50K4K4j31j31K2K3J00J00j77j77M67k55K08
1310A755j01j85L30p7p7k6l35K03K03l51m1R5R5L7L8m0m0L08kk83K6l9K71l97L24m68K53P6
1308A552P6J22l95L85j31o0o0L03k13L2L2k42K74L5k74j08M08j79j79L68N9l15K00j25j25
1306A440K36p3L3L3onK55n4M9m66J84J85ln18J7L27O2O2j94J16j80j81N32j90r3K15j94J14
1304A703k47O3K44k73NNL62j53n1n0K45k71K31k84K06K06m77L8P2P2o9p0J71j38K54n4m83
1302A257K38k19K97N8N8l41l2K43K44r9r8PPp1p0M4M4L34j82j11j11J86j23P7P8j22L93m47
1300A539O9n4n4K96j4l03K12J14j96j89j90M59k63M32q3k40k40L79j37O0O0J63l53J15J15
1298A697p1p2OOj4j3J24j86j1j2P9P9j40J69K58m63K20k96K84k31M33k90K2K1k4k4j16j15
1296A320K45K45m6m7K12l05l25L97m2m1L7L8l23j4L55j60j80J30m3m3N05o29M55o0Q7m28J72
1294A512J71j5j6n9n9J8J9J6J6J91j19r5r5J24J25Q7k21o7K43m1m1J20j89K08l08K72k43j20
1292A434J88j7j8JKl1l1K44k71P7P7P7k33R5R6j6j6j5j6O2O3J01k09j99J11R1R1j64J45j84
1289A535j84J09J10k6k6j01K08j39J69m9m9j59J50k46M76l75J41J52j57Q1Q1k09L07o1o1o7
1287A610o7N5N5J08m07K50k65N7N6J22J21k15R5K30k85j45J64K67m2ql17R5R6N6N7r8r8Q2
1285A629Q3p2p2L4L4L4L5j10j10J3J3J71l45L71j45J02k08R0Q9o9o9O0L70m80K42j44j45J55
1283A556J56j93J16P6k33K51K50l03K14j42J68l47J68k44O5j76L41j04j05K84k5k83K6N2N3
1281A621q4K26j47J63l98L23j00j00K35k81J23J23j61J49J2J2k72k72N39j82J01J02l25J92
1279A599K30p9j01j01j21J89p0K39k12R7k35K81o7o7r8r8J8L28k38K78j67j68J49j60L03k12
1277A517Q4Q4l74L48J23j87k64M5Q0N96n12Lq5K23K4K5k02J09k01L14M5M6m64K58j23J86L8
1275A736L7p1l82L41j75Q8Q8j38J71J75j35r6r6O9O9k61N0J26J27k80K37o8K42m61K61r2r1
1273A471O3O3k30K86j97J12J10j98k5k5J70j40O6O7k28K87o1o0p9K31p8p9j14J96k11L05J8
1271A720k92J02J02j82L33l3l4r3r3Q1k28J45J46j32j32R8R8j22J88k34K81o7o7L0L1M9k60
1269A435R6R6P7P7j38j38L39j76j62L53N1k59LLr4r4PQN30l99k8k8O9O9j4j3O4O4j18j18L6
1267A598L6p7p8L34j81J41l74K63K64m19j11K12K13l59J57n0K60l0l0l00K15n1n1p6p6M13
1265A843n14M52o4j59j60J68J69j02j02K27q2q9q9K21q9QRj2j1J5J5J5J5j06j06M8M9L0L1
1263A630k2K88m61K61p5K35p6n91L57M7Q0Q1Q1k29n0n1J82j28J8J9j55j55K29K29k87K3o8
1261A412K42o7o8J82J81k24k25L65l56J91j19K04l12J14J14J0J1J0J1j31j30L73j43K92m30
1259A507K73l7N6N5j19j18P4P5q0q0J9K0j36j36R5R5j56J53j4j4K5K4j39J69K8K8j74L41k97
1256A537K18j28J82k89K0J8J7j38J72k1k1J72j38r0r1M5M5J04J04j08j08M34m93K22k94M07
1254A778R8k44k43J82j27M7M8%%K71k44J63j46J89l27J58j51k8K81r9r9O3k47L96j20P4P3
1252A746j39j39J90j19Q5Q5k44O6j58J52j6N00k41O8n5l63k9k8L00j0j54J55J36j74l0l0o9
1250A485K40j55j56J21J21n4n4p3K36q6q6Q8Q8r6r6N8N9p2p2J79j30J29J29k18R0k2k2P4k35
1248A470R8k11L56j60L19j96M2M1M8k62O6O7j11j10J47J47o0o1J26J27l25J90j18j19J43j66
1246A488K97k17q8q7J38J38o7o7j0rJ86j24N0N1l6l6J19J18j02j02k4k5ppL8L8k14N07l63
1244A583J52J15j95j43j43J34J34jkk62M7J12J11K61m8j12j13j54J55P7P7k44O4o4o4K94k22
1242A549O9O8L7L6p3p3R7m19L04oP3P3j01j01k6k6p1p2M06l16L22m00K91j9j48L68m15J01
1240A528Q1Q1K4k86K16r3mmN4N4m7m6o5K44jjl68J47J57j52P3P3j56J54N7k52J49j60L43L3
1237A833j11J97j05j05l36L87k72L9J54J54l55J61j38J72j5j6k45K70k40M83m26Q9m00N28
1236A703j40J70m68M60j32j33L70j45K5K6L1k77r0K19J62l54P6P6l4l3L7L7j05K04j74L42
1234A853l29k0j54L62q3q3O8k41J20J20k61K55l5l4J61J62j99k00J46J46j82J26M8M8l07M15
1232A902l56J60j49J60l39J76L18j98K00l15J9K0qqqqM0M1M0M1q5q5Q8k20J95J94l53J63j95
1229A430J14k8k7J8J7K76k40K62k55J00J00r5K14j98j99n8K51l29L93j04j04p8K31m6m6k7
1227A572k7J87J86p1p1q1q0k16K99K5K5r7r7J17J17j34J75j32j31J92J91m62K61j65J44j40
1225A587j40L56j60j54L61o5l74K62m7J0J1M4k65K12K12n51J71M29k93l8l8R0R1j60J50j99
1224A502J11q6q6K82k8j04K06j42j42r4r4M35k87K96k19OPJ24j85R8R8j73L43l92J24R3R3
1221A786j13j13r6K13J75l41N6N5J20J20j91J19j66j65L33j83k03J07m7K61k60K55N2N2l60
1220A466J56o9o9K2K1K17r3p4K36l21j1R2R2J02J02k27Q2k4k4m4K66j7l27j1j2L31j85J25
1217A802j85L1L1J2J2j14j14J77J76l85J31mmM3M4M3M3qqj83J27j00j01P3P3J8J9k72K44k9
1215A592k9LLR0R0o4o5N0N0k21K95k12R6N2N1k62M7L17j98J35J36j87j87K64k51N8N8j75J33
1213A669J73l43m5m5J80J81j31j30J72J73n46J76o2K47P3k36J89l26n6K54J44j65J21J22l43
1211A446J73n6n6J30j78J60j50j11M05l08LJ18J18j7j7j7j7rqK3K4k18K98QPj50j51K75k41
1209A484J97j12J85j25K07j01k95J4K08j02o3o3R2R1j02K07q9l99L11JJ79j30M4M4k43O6O6
1207A572O7q0K30j58j57L75n54K07K07R4k17j97J13r4K16j33J77L0k80M9M9J55j54J9K0J7
1205A573J8L6L6k47O3k8K81j09j10l35N93k28Q1J00J00K4k85O2k46K78K79k05k05n6n6J30
1203A544J30k08L08N6k53j37J72k2k1k2k1m1m1K57n2l3l4l3l3J22J21l8l9ool35J81M5M5J2
1200A618J2k0k1J06m11K73K73k65K51k13k13J76j33M2M1J32J31j26j27R3R3J96l19K68k47
1199A610j18J91l24L97j89j89L51l70K80k35L57l64J84j26N6N6r8r9K4L33j30j31K51k64O
1197A459OJ39j71N25m03L8L9o4o4L51l71K29q0k21Q8M24k99J21l95J07J08J4J4m4m4L97n31
1195A372L01k15r9K10L13k02j16J94PPk54N6k48M75k32P9k25Q4l2l2K77k39J19J19j13j13
1193A493L76l46O0O0l4l4j4j4j20J90L5L6l13mK48k67L11Lk81K34k1K87k41O9m02L20k80K37
1190A588N7N7o5o5K2K3M1M2p1K39k13k13K19r1P1k39L44j71k10L06Ll07J26J25K22k93lml5
1188A505l4j71L46J6J7rrk14R6J72j36q2q2K67k50O8O8k94M29l4l4k20Q8N9L69l79J37K43
1186A932m79N6N7q9K20j40j41L51j64j33j32J57J57j00j01M3M3K17r3k4k5j67j66N34j88n8
1184A567n9K84k6l15K00K19r0l34k6J07k03J13J13L63j53k43k43L07lP5P5k0l30J02J02P2
1182A654P1k76L2K01j09Q4Q5n4n3n4n3J29J28k5k6m7m7L0L1onj59j60J62J62n8K52l87J28
1180A630j17J92l17M04m59M69l37L85k92J8j9j8j9j8J03k05K26k89M34q3j33J75k32P8K90
1178A866k26j8j7k24Q5N6N7j56L59M7k63m4K66k62K53m18R9K32k84M45k77P5P4k22Q7J23J22
1176A835j15j16N6N7p9p8j31J80J40J41r2m00J1J2K50n9L1k78K37K37p8n95M23J13q7q7j06
1174A422K03J65l51J09J10p8p7J4J5M6M7k28K87m7m7j72L44k04k03J89J89o8o9N1N1P0P0k52
1172A586N7qpL63l59k23K92j57J53k79K36J4J4J3J4J42l73P1P1m0m0J34J34k47O1l5l5q8q9
1170A375J70J69j34j35M32q3l09JK07j02J10j99n8M59k25Q4N9m57L30K1RQj11j11K4K4J31
1168A689j79K8K7j49L66R5k14m7m6J8L28j79j78m04N24k48O2K17l00L21J2jjk0k0J61l55K55
1165A762k62P4P4m7m7k8k8lL05j06j07LL13m28Q7R4k16j45L71n3n3J15m01K25K26o4o4n3n3
1163A491J99j10LMQ1Q2k75L4K28k88J01J00J0J1k60N0L0L0M8M8M8M8n5n5k3k3j58L57Q7k23
1161A620j06j05k67O62j46J64k23Q6J13j95k2k2J74j37K12r7l8l8k5k5k52K63L1L2L3k75J56
1159A573J56r0r1O5O4j4j5l05K11K1K1P2P3k15R4R4k15K1K2KLK6K6Q4Q4J7k91K11r8K6K6j2
1156A646j3J61j48j80J29K17k99J66J65j57j57L0L0j86L30l66L55n7n7j2j2j12j12L00rQ4
1154A736k25k06L10Q9Q9j37j36Q4Q4j9l28K72l8J94J94k97k97K70K70l01l00L31j84K02j07
1152A550L4L5qqj82J27k3k2j46J65M68k54O8k41J47j62ppL9L9j15J94j86J23K91k25l08K08
1150A594J05k05j47N75k11k11O1O0L5k74M25k97J22J22l98J18L96j21j91J18q9q8Q1Q1r3r3
1148A475K21q8QQn9n9j11J99O1m54J45J46r2M23r2r2j76L40q5q6J2L21m13L08r1r1m7m6l0
1146A555l0l0l0J5J5K35p5k54M67l63L58k30k29J63j46l2K77j68J41KJN3N3k93K22j13j13
1144A451L48l74J3J3L39L0k27Q1o3o4K08j02J4J5j59J50L43n84J11J12o7o6Q9Q8q0q1P4P4
1142A686Q9Q8l75L46k39P1J16j93k7k7K25k91K33p6J68l47K62k54Q1Q2L4L5m3m3K8K8K21k95
1140A583K03j06Q7m28P02o37J42J42K01j08n6n6k37K79k17R2K21k95K08j02j87J21l42L80
1138A590J42j66J30j80J57j53J44j65K12l04L28J8k69K46j79J30j9l29K25K25j06j06j19L97
1136A849k45O5j93L22k32P8l2l2j55L61j99L16l48l9P7P8Q0Q1j77j78R6R6pl17K41o8K60m9
1134A729j44j43K50k66L53j62o0o0J1J1rrK59n1k89K27j14M01r4r5k94J5J31J31l62J52J21
1132A639J21n1n0nnl08M13j47j47ppJ48J47r5r4J56j53N5N5L6k74J81j29L16j99o8o7K09j00
1130A570L6k75L58M8l13M09l90L32l34J81l1l1j69L45j18J92j80j80L81l41K03j08p5K35j01
1128A644j01q2K27k23Q5k23K92J33j76K75k41k03L12k61M8qqJ08J08k49O0J43J44k3k4j14
1126A643J96L90p43L6L6K22k94N4N4K05j04k00J09J09k01k6k7K30q0o0o0N0N0K24q5l7l7n6
1124A598n6K5K4N7N7k52K63j81J28k13R6l8l9j03K06N1k58J81J81j16j16J97j12M9k61K80
1122A648k36K93k23L13k01j57L59J2J2j30j30J73j36Q3Q3K4m92K30p9J8J8k34K82K03j07J00
1120A726k10J53j56K4L33m62K59P2P3n11K11O2O3p6p7K14l02J98J97k1l31k5k4L29K1l84L38
1118A694Q7Q6k76L3o4o3J37J38N4k55M7M7M7M8k11R9p5K34k02J08k41O9K92j8k57N3J3J4j22
1115A516j22J18J18L5k75k7k6L03k13J51j58M2M1K54n5r3r4k44M78j85j86L6L6K10r9p7p7
1113A407P8P8j1K99l97K21J06k04K02m17K18K18k14R5m02K16J58j51n0K59J05k05j46J63M6
1112A672M7p4p5Q0Q0j03j04j93M24n4n4O1O2j72j72M14k04O9k40kL07k79L0J72J72l90K29
1109A703j6K93l93q3n2K58L6L5l12L06Ll06O2O1M2M2M2M2j04j05N0N1J6J6o1o1QRL56k62O6
1107A742O7j26j27O9O8L0L0l20K99j85J25k50L68l09L11j25j25O8O9o7o7o7o7J30J30o4o4
1105A543L35k85j3j4o6o6Q8Q9o3o3J95J95q5q5j63j63J84J83p4p4k4k3k4k4R1R0k96M26k35
1103A579P4j13j13q2K27P3k37j1j1K67m4K09l08R9R9J38j72K2k88Q9R0j04j04K62m8J59J59
1101A911k70K46l54J62M7k61K66k49k6M89l68n9J8J9j17J93j50J61K5K5k74L5J58j51K95k21
1099A550J85l30R6R6j3j3K5K6k0k0k50K66nmj04K07j42J67p4p4K74l5j26j26J0J0m9m9L57
1097A835l64N1N1K6K5j27J83J63j47J30j80K45k70J29j80j35J74q5q5r7M17k5k6l99L22Q1
1095A712Q1k61M8k44M78j87j86K49o1k2k2j22J88k57K58j57J52j96J13J80l36K83k33m4K65
1093A679j34J75J41j68k26Q3O0N9n7n7r9K09k35K81j51J58k73K42K6K6j29j29L18j98R2R2
1091A785q3q2ono7o7J08J07k37P2J50j60P1P1k39K77q0p9J84l30M76m52OOL25j90k48K68j01
1088A480K08o9p0N2L61m44P1j06K03J38l76k65M58K0J9nmR2R2k41O9k40K75N8N8j68j68J07
1086A605J07k8k8j90J20L0L39l29l28M44p1m0m1K4k85R5R4K49o0q4q4r1M25m98K25NNJ76J76
1084A962m75M0QQj01K08j95L20P0k40n6n6M2L50l94J22K5k85R5R4m1M74l31k2rqL4L5j59J51
1082A666J51j59j40J70n8n9J34J34l26j7O7O7o6o6Q9Q9j30j30J27J28j23j24J35J35j15j16
1080A463n0K59Q9k19N1N2Q5Q5j54j53n4K56k92M30l53J63o4o3j51J57N25m03k81K9K29q1r0
1078A465q9M84k38j77L39k66K49l79o9K92j7K68k48K3K2n9n9J92j17l2l1k06L10J60j49p8
1076A590p8o5K44q5q4O4O5j49j48j03O19k51k52P1P1o4o5l8K71k6k6j35L81l73J42J63j46
1074A593j52L63o2o1j0j0j80J31k5k4j18J92J8J9L5L6k67k67N16k06r6K14K57m65L47j69q7
1072A522K23q1q1K49o2k35P4Q1k28K54k60J18J18j66J44l0k9j45j46j2K98j21L94m77K44j49
1070A497j48K63m5m6m5L17Rk43K72l40l0J37j72K66m3k18R2K1K2l08O21k07J03j88j87K19
1068A619r1Q3Q4l0l0l0k9l0l0J44j65M6M6K6K6KLj72J37opm5m5l4K75m27K94j84L32l58J58
1065A562m2m2J96j13j78L38k62K54L0L0l82J33j6j6P5P4J07k03j06K04j65J46j0rK3K3K3k87
1063A387J56j53L69j47J6J6k16k16M28k94o2K47M1M1k30K86l0k9J38l78J30J29k50K65k79
1061A365L0J45J46k0k0j74J34k21Q9j83L33k27Q2m1m0R2M02k17k17j06K03J07J07j11j12K37
1059A783p3k08J01M4M3J09k01J86l30R9R9j1j1j27j27n6M59j44j45J84j26L08k08O2O3q6q5
1057A602Q8k21m4m4K97j2l73J43L62j54J62j47j80J30rqO2k48j06M10n5n4j4j4r2r1K69K68
1055A927k65M3k3k2l6l5K48k66K3K4r0q9J49J49P2k37P9k30L85j30j18j18J13J12j0j0k13
1053A432L02l93L28m6m7jl10L56M7r4K14l98J17K0K0l9K70l68J47J54j55pqj69J39k2K88l15
1051A462K00p0p0rrJ65j44K6K7PPM1M1j78J31j58L57k62M8K06j04j62J48llm09L12J41j69
1049A569NNL36l86K1K0k5k5k4k5K4K5J66j43J75l39K59m9K5K5j49J61j3K96k20k20K0K0J93
1047A727j16n4n4K54n4j97j98N64l65L4L5ml13J69J70j40j41L99j18J72l43K99k17J95j13
1045A591J26j83j32L84k78K37j17j17J81j29M6M6kkk08J02J07m07L33K4p4p5l0K80M8k61J57
1043A647J57J7n00K23K23n74N61l99J16K93k23K35k80J29J28l48J67r8r9K18r2K62m59L72
1041A676j44J63J62m11L11k60N0kkJ0J0K23k93J03J03q3q4K04K04m53j44K46o4j79L36J81
1039A863j27k51N9OOJ02k06K83k7k6k7o0o0r2M23l32l32L13L13m68K53p6p5J48J48ppj75j74
1037A395K57n2K7K8m9n0p7K32r6r7MLK93k23J02J01q5q6O4O3n36L92J5J5o2o2j87J23J55j55
1034A452L78l45J19j89J80j29L16j99J06J07m09L13k3k4M2k68j1j0K22q8L6L6J6J6j65j66
1032A313N95l33J01k09K4L33k62K54j90j91K57n3M3M4j2j3j87J23k9k8J45j64J19j90o7o7
1030A356L22j92J16J16r6K13j15j16j10j11P6L86j51j51n5n4J96J95k36P4q5q4pqJ83j26K8
1028A564K8P2k37R1R1k6k6J29J29k05k04K79m43J77J77j58L58o3o3J89n34L73j43p2p2J79
1026A590j30L34j82pqK31k85K07j03n7n8K8k82K54K53o7o7k22K94J04k06K07j02k26K89l55
1024A434J60k16K99j13j14K1K0N3N2k45K70k0k0ppl9l9L31j84P4P4J16m00J80l36J87J86j04
1022A613j04M5M4k07J02L4L3p6K33R9m16K22q7P5P5J20j89K51k65Q4Q3r9j00lkn9K50l11K06
1020A651R2k17J24l91L30L29k70k71J35J35r1r0j76L39j44L72l45l5J00J01j23J88o5o4n1
1018A563n1p0K39o1o1J33j77K5K5r1K19j30j29J2J2L07k09LML9L9l8l8P4P3q1q2N9N9K53k64
1016A656J04k05k24K91r9r9J85j25M2M2n4n5J05J05RQk63K53l8l7j17j16J87j23J23J23k83
1014A395K6M14j01k81K34k91K25l3l3j5j5j6j5L1L2j63J47J72j38P4P5k24Q5j1j2J2J1J1J1
1011A607o6o5L53j63J7J6J7J6k77K39k25Q5o1o1J39J40p8p8L2L2L2k77M31k90j5j4J7J8J6
1009A537J5J6J6M8M7k03J05J4J4k18R1M2M2J78j33j33J76K1k89N25m03J19J19j76J34J01k08
1007A597K59k57j40J69j01K10p5p4M9M8j05K03k22Q8o7o8R2R1j80J30j5l24K04K04q9q9K01
1005A739l14M5M5P7k32L77j38k55O74p70J58K55n5j14j13M01l20Q8Q8K48o0l99J16j60j61
1003A220M97k25J03J04o4o4J42j67k43K73J38j72M2M1j51J58LLm2K67l2l42J87j23r6M19l42
1001A534l2K38m84J54J55k49K67N5k55L22J3o4o4L0L1j62J46J93j17j04j03P8P8p0p0K08j01
999A627L5k75K98k17q8M28k60M9J21J20m20R7j81J28L88l34N9N9K81k34J01k08N4N5k36K80
997A727j78J32J44j65J75j35k5k5k94K21K22k94r7r7J99j10J56J56j21j22L1L1L91l30k19
995A373K96j42L74m50O6J5L23l21j1R2R1j27j27M34k89rj0k60M61m05L16j40J68J7J7l30J84
993A606J4J4j09K01j81J29k7k6P1P1J22j87j84L32k86K2p7K33p7p7L4L4j98J12j15J95N9k50
991A455J32J32k61M8L13m09J71j38L49L9j99k00L61j55k0j9J1J1k02L14p8p7j99L15k5l35
989A334K71k45M00l22L81l41J53J54j49j50M5M6M5M5m8m8o8K42J3J3j42j42J31j79J89l27
987A301L19Rj78J32P2P3j79L36k79L0j44j44L89j26k49O1o6K43j30J79k22K93l83L39jjj29
985A545j30L11Jj02j03K43o7j24J85j91J18l6l6P2P1J04m12l0l0r4M21l1l2p6p6MMj18j18
983A273N65j57Q1k27r1K18K5K6j56j55L2L41j23j23N0N1lml77L45k97K19J48j62K8K8j98J12
981A469K86k30R8k10J39J38n4n5Q4k26l8M77l80L42j73J35l83J33j6j5L73j42l29J87R8m18
979A290L56l66L42j74L61j55nmk11R8Q7Q7j52j51Q0Q1r4r3K56n4l69N59l59J56R8R9k67M3
976A539N6N6k54K63k8k8K9K9K04j06j19j19L6L5m1K68k54N5R1k19K84k31j79J30j08M07j34
974A662j34L3L4J44j65J83j27j27j26L05mj59J51k17R2j16j17K82K83l05MQ8Q8o7o7n4K56
972A820l95J21Q9Q8j4l24L7L47j22j23N2N2r5r5O0O0l9m0L8L8O4O4l23J93K87k3k9k9m50K72
970A581N3N3j66L49m05J11J13j97j26L90m5m5k25K90j98j98L11Jl19M02k4k3m6m5L28l94K30
968A756k86K49k66R8R7k24K91q0q1J07J07k51k51L42L2l72N57l14mQ6Q6k05J06p5K35k48O1
966A553k2k1J08J07k41K74l06K09j96j96M02R4l17K00l3l3J07J07l37J78j27j26O0O0N4N4
964A612N4N3r5r5r5r5N7N8l9K71n8n8n8K51j24j25K18k99M56k66k59K56k6k6p1p1N5N5N5N5
962A646m7m6K43k72N8N8j28J80k70L9OPL72j45J7k92L62l61L17j99J12J12j78j78Q3Q3Q3Q3
959A745k4k4j78J31k63M7K21q8j49j50L66N7j1j1J5J5k99M24m28Q8J18J17onj01j01o3K47
957A690m91M37q5q5K20q9P2k38K94k21M9M9j1j1K98k17j57J54j89L27j00j00J07k03J70J71
955A841n13K10n3n4L79l44J99j12O3O3m17L06l6K73Q0k29l26J89P3P3j8j7k53K63l18J99j0
953A511j0J77j32M8k61M41p4o6o5q5K25l69J47L2L1L9M0N9k51N9N9M0L9k8k8rqr6K14j61j60
951A358L44l78L50j65k39K76J28j81M0M0K14r5k1K88l37k7kkj12J98l89L33n4n3nmJ05J05
949A715J53n68K62k52L63N4P3P3n03J2K76l3j57J53m0m0J17J18L3k75R0R0n2n1k32K83opj5
947A634j5j70J39j86J23p0K39J20j89k03J08J55l60K97j2k16R3J0J0L57l64M2M2J4J4j60J49
944A601o3o3J11J10r7r7j16J93J09J09k97K19k61M9J07J07l58L65k16R4rrj64J45J0J0klK07
942A791l08K91k24m4K65j15j15R4k15K87k2K3K2K3k86J37J38j59j59J63j46J63J64j1l20k4
940A413k3K60k56L4L5N4N5j20J90o8o8J44j65q3K26j09K00k90K26k18R0J6J6j39J71k3k3J90
938A735j20j03K06k97K19J31j77K9K8l4l4j89L27P5k34J46j63K0J9j34L80j86j87p0K39K7
936A653K8k43K73J9K0k77L3m8m7K24q6j9j8K1K0J81j28j09j09K27K28m04J12m4K65l01K14
934A685j87J22j17j16K06j04P1P0J6J5o1o2O0O1j13j13K47o1l0K80l45J71j77j77J70J69M7
932A727M7l66J50n6K53n3n3J60j50j97J12k17K99o2o2j85J25M4L53l03Nj52L63l20j0j91J20
930A381L12Lk15R3K67k48k7k7L27j89L7L47k40k41M4k66L34j82R8k11J89J89m5m5k19R0P7
928A633P8k64M5K66k49j46J64K25k91J73J73j19j20K10j00n7n6J56j53J32j77m2K68j19j19
926A511J52j57J34J35l10K06k20R0OOL1k79P0N85k55k54l6K74k9k9j83J26k9k9j64J45K2L32
924A851j84j84K8K9K9K8P3P3o2o2j93J16j2j2K71k44j27J81m2m3J12J12L1k78L7k72M30q5
922A601k1l30L12Kj33L82k07k07k53M70K49k66o6o6J1L20l17qJ96l19J26J25J81j29L16k00
920A769M9k60N5N6j23J86N1k59q5K24k20Q8m6m7N0N1J34J35k0k0p9q0O2k47L99j17j04j05
918A497J06J05o9o8R3k16J12J13k5k4j21j21K26q4L81j35k04k04L11k04ooJ16J16j23j24n9
916A383K50J35j75k6k7q3M33l21j2L11k04k05J05j59J50j33J75J78l38K23q6pqJ47j62OPQ3
913A640k25J65J66k14k15K41K42k23k22K09K09j52j52J06J05m9n0O4O3j24j23K76k38j23J86
912A562o3o4L4L3r3r3R4R3j80L36l22J94O0O0j65j66J68J69n8n7j56L60j69j68K0L29m05L16
909A669m3m4J11J11l48J68j3j3K75m47J13J14L1L2k20Q9J04J03r7m05L58j58K87k3j01j01
907A552p6p5L90j26r3r3J86J87l62J54m7m8L91l31J3J2K5K5P9k31R7R8q4q5j04K05n8n9J15
905A657J15j30j31K4K5L3L4j66j66L86l36K12r7L21j94P6P7j18j19N39l89L3k76p0M45l29
903A456k1J99J99j31j31p4p3K24q4L08m13K70k46K51n9j58j58Q0Q1n5n5LML47L8m6m6q2q1
901A547j85L31l37J79J72j37Q4Q3j3j3o1o2K09j00j87J22p1p1M3M2M2M2j51j51M16r9j19J91
899A746k74k73K22K23J39j70j41j40K01K01j99j98M65k57m9n0L51j66K1K2l01K15J2J2M5M5
897A702jjj93J15P8k31l7l8J72J72L6L7k12R7p6p7pqppO8O9k9k8J86j23p2p2k21K94J59j51
894A594J66j45M3M3l07K09j97L18k45O3j94L22r8K11k59N0n9n9J15J14j49j48J41J41l37J78
892A511J01J01m18N10j08j09J09k01j3K96k72K44l49J66L29j86j22j22P4P4J71j39q7q7K15
891A688k99L44l78J00M08j82J26m91M36n16M11L35l87J04k05p6p7J06J06M8M8m4K65l21J94
889A743j94L22j95j94J29J28J15j94N7m57L92Q4m18L04j02j01r3K17J40j70K06K06l42J73
887A756k16R3K09l06K73k42L5L5j97J12r4M22k19k20L41j74M1k68J32J32j14j13J45J44j19
885A588j19K29q1j77J32L78l45j83L34kkj07j07q0K28m30K92K15n07K97j3l8l8M6M5j28J81
883A608m2m1J0J0j88L27ONQ1m34M22r3j11J97l75J39p9p9K04j05N5N5J26l90N01k21P0k40
881A418K24K24j56j56J1J2J53j56K41k73l6l5K61k54O8O7k59K57j4j4n7K52m5m5k84K31N7
879A692m59N58j64Q1Q1k13k13L73l49J02J03k0k0L9L9l9l8M5M5o4o4j29J81j22L93Q9k21l04
877A402K11q0q1J51J52k50N9J5J4M8M8j84j83J43J43nnM5k65L99n29N26J0r2r3Q3Q2k40P0
874A594R6k12L9L8K24q5k98M23l80p1M90k33j02j02Q4Q4J1J0K3k86M41p5l59J57J67l49L08
872A637jl51J65K10j00J8J8m6m7k60K55K56k61R3R2j7j6j46j45L5L5M9N0L0L0J15j94N7N8
870A619l7l6j65L51J11j98RQONK5K4j19J89m2l52N6N6J01k09L66j50j30J78l2l2l3l2K41o8
868A710K8K9o1o0L7L6j62J48j04j04N8N7j94J16L6L7k47O3j4j3J80j29n0n0N17k05q7q7O8
866A553O8k05J05k3k4L13k03l38L84J12j96l6l5j02K08J30j79R0Q9j81J29j9j8j92J17O4k44
863A367P7P8L9L8O5k45J90j20N4N4j09K01l92J23K15K15j46j46k51M71l22M00l42l4J22J21
861A723k3k3k4k3j19j19K87k2l2l2J03k06J74j36l09M12Q5Q5JKp0p0QQn8n9L80j35k54N6J40
859A750l76J34J33j12j11K78k37N3N2J3J2K19n03L50M0k69M1L03k12K70m51J00R9k16K99j96
857A463J14j44J65J8k91K05j04J44J43n6n6%%p8p8j6j7K93m29L47L7L7L7j43j43J21J21k21
855A469K94j25j24J04J04J49j60j20j20K03K02p03K25K12r7K7K8J69l46J28J27J21l94L77
853A750j39j51J58j33L82m56K66j33J76j26J82k81k81M98j7k03L12l32J83L05k12N3k56N9
851A604O0j41j40J08J08o7K43q2q3J10j98J04J04j15j15J64j45j00M15l71J45l5K73k78L1
849A599j69J40K0J9Q4k25J5J6mmM3M3K23k92K66k50l20M01l3l4P0O9P0k39J3J2Q8Q8l82J33
847A460K3K3Q8Q8k56K60l26L95l09K06K6k84L51j64K35k81J82l34J04J04J30J30l40J75k6
845A660k6r0r0K73l5k87K2K54n7o2o3J36j74P7P8J4J5J4J4%%j42J67k70K46k4k5n9n8J15j94
843A429J01J01m8m7R6R6q4q4l5l4P6P5J50j60j8j8l27L95k24K92j95j95K24K24p1p1j36J74
841A686k18K98l21j2L28l95K06j05M8M7J24J25k36P3P3P3k73L6K10r9j94J16J61J60j03m13
839A395Q9k19K32K31j48j48J48J48j61J48k64M5j23L93j74J35j93j94K26k91L28J9M2M1k68
837A437K48j44j43K49o0k86K30P6P5j42j41N54p86O77k51L2L3l1l1l1l0L6L7L7k72K84k6k5
835A606k5j1j1RQj51J59O2k48K79l0l20J95J33J32j96j96J00J00ll12R6k14L41L1K28k88J06
833A580J05m09L12k9l38L67j48K38m83M96k0J3J3l06M15m16L06J9k91K76l3r1K18j30j29J7
831A552J8kkJ82j27j27J82n4n3l4l3K0K1K1K1M0L9j15j15J47J48j62J47k41O8k9k8J66j43
828A507J2J2K12r6l3l2l41L80k6k6P3P2R2k17llN5N4j25j25m1K68llm1m2j94J16J15j94J88
826A611J88l80J36j19j20M61n5N4N5j13j13k36P4L12k03J19l97M42p5r2M23m34j25J70J70
824A753j39J70n6n6j1l21O34n01M0M0k4k5m4m4L18Rj65J44m8l58J97J97lll26J90K15l01J96
822A678j14P0P0k40K76j13j12j00K09j09j10L3L2K34k81J44J44P1k38q3K26p2p2M4k65J88
820A510J87O5k44Q4k24K39p1O6k45J49J49K2k88J45J44k8k8Q7k21l8K72p7p6jjp8p8Q5Q5j66
818A425J43N7N6p9q0KJJ56j53K00j10j10K00j12J98l5l4j46j46M2L50j09j09O4O5r2r1Q2Q2
815A717k29Q0J38l78j2K98q3K27j37j36j30L86k04J05o9o8K55k60lkK23k92K68k47J77j31
813A493j0rJ84j25J6J7K30k85k8k8L11k05J04J05l23j3P1P0o6o6L39l82M5M5O4k45L34j82
811A461L39l81J36J37K27k88m7m7R5R5j90J20l45J71J68J68l48J67L0K9r3r4Q0P9J18j92r1
809A504K17l42J72K5K5J34j75J22j88K58k59LLk9l0J33J32k16L00l19rK3K2j60J49K1K0K57
807A793k58L2L1j3j3J41j68J74j36k71K44noj67J43J81j28j28J81J00k10K8K9j99N24l15n
805A579K4K4J21j88R0k19K64m5o8o8O7O7%jj55J55j05K05j36j37K62k55K30k87L01qk1k2r3
803A581r4L51j65j33j33J95J96n8n7n8n7QRJ06J05l38k8K23k92J52j57J39J39j18j19K10r9
801A508K16K16n64L64k57N1m5m5k1K89j43j44j1j1J24J24l8l48J03J03j25J84k3k2J77l38
799A324Q8Q8J19j89J19J20J03k07K57k58J4J4P9P8k73L6K93j5j45j45rrk0j9M25n02J59J60
797A685j95J14k55K60o9o8L60n68J09J08Q3Q2k47O3J21J21NMk34P6J85j25K37m86N6N6J15
795A593J16j88j88L75l47L10Jl5l5n4n4K7K6K01j09p1p2OOj86J23K78l1r1r2j62L53J22j88
792A634J8J8j5j5m7m7K81k34P6P5j90J19p4p5J11j98K27q2N2N1j22j23J70J69q9q8j20j19
790A363J38J38r4r4K35p4j22j21M39p7l02K14j28J81k08k08M75k47l4l5K50o0o3o2P3P3l7
788A613l7Q6Q6P1m45K97j3l22j3K83k6K73m49LL11M1k68M53k68l64L57l5l5J16j93J55j55
786A522P9P8k69L9J56J56k57N3K7K7l60L62n9n8n2K57M3k66L14k01l6K74Q0m35K15r4l14m
784A277M44p2j94J15O7O8j84L31l16oJ09J09j74j74K77l2j75J34kjQ3k25p1K39qqj63J47j04
782A491j04N1N1J72j38L6L7J7J8k8k7j65L51j97j97J61J61j29j29L57j58j64J44k64K52J3
780A612J3k74K42llk99M23k74K43l2l2JJl4l4k1K88l44J70k2l32K19r0M5L54j45j45J26j84
778A469R1R1q4q3J5J5L24j91j14J97j65J44j64J44j84J25r0r0K20k97J13J13m8K61m51K70
776A631P0P0k93K21l58J57N7N6q5K24j48j48L04pn7n7JJm9m9K41k74K6K7j42L75j05j04k65
773A320K50j18J92j06K05k94J6l6K74k99J0L84j32J39j70j64L52j20j20M8M7J30j79l8l8K22
771A775k93j32J77J79l37j62L53O4O4j09m19L50M0K1K1J34j75r7K12l8l8JJjL08k27k27j2
769A433j3j2K97j81J29j03j04J24J24J44j66j58j58N45L0o77M58l48J68k0k0l3l4M60k62J64
767A787j46J0J0j64j64K00K00p7p7J22j87j2j3Q3Q4J03J03l56m7L6L7K6K5n2K57l06KJ6L25
765A825j92n02K91K91l36J78J34l82M78k43j60L56q2q2n0n0J13J13j39J71j23j22N2N1J05
763A695J05k24Q5j02j02J89l28K48o1Q0Q0m5m6L2L2n0n0J04J04j11j11J85j24J75l40J5L24
761A759q2q2P9k30K93k22M9k61K20r0J61j48J31J31j46j47K6K6r1M26k08J01k53K63r0q9R8
759A624R7j23j23m6m6J32J31j20J90r0q9L75j41m5m6L2L2k37K78l0l1Ml05J60J59m69M6N69
757A888j54l99L22OOJ76j34n6n7J06k03J26J25n9o0R5k14Q0k30J00R9k00J09o5K44j87J22
755A586n2K57j68j68j3j4K93j6P3k35j8j8K0K1K65m4PQk96K20p0p0k8k7M9N0j00j01Q7Q7k47
752A338K69J1J1k57K59l1l1k7k6J47j62J26J26l37J77J2J1J99l18M58m70J74J74k21k20N6
750A448N6j82J27L27l95L01k14J86j24J34j76J86j24j88L29j56J54l9l9K51k65J45j65k2k3
749A532N0N0k8k8J03J03j54j55l9l9K19K19j06j07k9k9k0j9N8N7M2M1j13j13J57J57q1q1j11
746A536J98k27Q2O4O4j55j54O7L76k30Q0j65j65J12J12J2J1r8r9j30N91k78k79J73J73j4j4
744A643O5m51oL03K06l10K32p8Q7k23K80k35J05k04O0O0J71l44Q1Q1J88j22K84m37J14j96
742A354L20J0m13N15j68J42l17K00Q3k26R3k17o2O61o28R5N07o28J94j16M32m97J42J42j16
740A502j16M43k79j24J85l5l6L90l32p0o9K0K1K00j08K07j02l64L58J65j45K2k88L30j85j22
738A468J88K33p7k29k30K86k3rrk8k8J7J7J7J6P3P2j1l21K31K30l04K11k62K55j77j78K16
736A644r3p4p5J94J93l67L55l1l0q2q2N5k55J78J77j37j36Q8Q9K26k90K06j03l50J66K82k34
734A514J04k05K71k44K35k81K08l07O28l01l6l6l15K00K14K13l95L26k09J01Q0m36L05mq5
732A545q5j05K05k21Q8Q9Q9jjL34n93K28k88K8L38k0k0M4M5l83L40j44j44J86J86k45O4m8
730A511m7J27J26j03j03POL63l59k43K72L3L3l1l1J89j20N4k55J80j29OOK22q7o8o8K12K11
728A914m84K37J07m09J84J85j%n8n8j78J32J71l45J81J81j41j41K89k27O3O4l8l7p0p0K94
726A745k21p3K36k05L12j34j34Q4k25L93j22o1o1LMj08K01J82j27R8k12n7n7M1M1l6l6M5M5
724A561L80p54M62k59K94m27M33q3K00j09j89J20M9M9J75l40J24j86L0L0L1L0j50J59j5j5
722A600N4N5k04k03R4R4lkK31p9k71K43m0m0J07k01k1K88o0o0j18j17J72J73l18J98o07P33
720A698j7l26J89J90j01j01N4N4M2M1m2l52J19J19R9J00k7k7m7m6O8k41J0J0J63J63l85J30
717A537N5N5j90j90K93j7j01j00N9N8K1L29m46M81k1n37L67j48k7k6q0K28P4k36j9k0L67l55
715A411J62J62j80J29j93L23l73L48l6l46L37j78q9K22K66m55M6M7j7j8K05j05j05j04J29
713A588j81J49J48n6n6j53J56QQnnR7m19L03on5n5Q1Q0L7L7m46K76J20J21k1l30P6P5j95J15
711A492m0l9J34J35j60j61K01K01q9q8K01l14L8L7NNj%J54j56P7k32L21J3J05m10L5L5j36
709A363J74n9n9L64n65J83J83J61l55J09J09J2L21k33k33J72j36P0P0k66K50k0k0n6K53Q0
707A872k30J01k08L20m02K53k63l1M84l16pJ80j29J6J5k61K54j71L45m55K67j22J86j16j16
705A466J98j12K69o59O25l03Q3Q4o6o7r8M17j15j15nnK0J9j34j35K1K2P9P9J88j22r5r6K18
703A661r1L1k78L65l58J84j26J09j99L09%QQj1j1M8M8j13j12j37J72j4K95l6l45K03j06L1
701A535L2J2J2%jk0k0R5k14J92J92k77k77N61l68K46o4j23j22L44l79M8M7k6K84j22j22K3
698A488K3LMJ78j31l4l5O7O8m9K60k5l35J68j42L42l80J3L23j48j49N1N1O1O1m8m9r7K12j42
696A609j42K7K7M7M6q0K30J01k09n4n4n4n5j21J87j28J81L09m14J09k01K56K55m47M81p08
694A198M27k5k5r8r9J2J1J70j41P9k30J27J26klK65k50q3q3M28k93J06k03%%K64m5J28j82
692A579j95L21l48L74l2l2N2m64K84k6O6O6j27J83r3r3p4p3J58J59p4p3r1r2J22J21k13L01
690A686k58K56j95J15K62k53J8J8J8J7k74K42j90J19j14M01n72L56n2n3j68J40J01J00k79
688A441K36J34l81L08k07k2k2J20j90N7N7k0k0P0L79m01J15j49J60j55J53o0o1m1m1K9L0O1
686A580O2k22K94O8k41j57J52Ll05K63K63j62j63j78L37M8M7r6r7k57K58M9M8j97N25k67k66
684A389R5R5O3k47Q2Q2P4P4q1q1K0K0J24l93K92k23L5L43l68o0L66n62M44J34k98K17q5q5
682A466M4M4r0K19M5M6j89j89L39l83L16k01J22J22jkjl11K47o3J5J4m2m3j77L37m4m4j2j2
679A572k4k4m3m3J81j29oL03m94K28j78J31R7R8l8l8mmmmo2o3R3R3j9j8J55j54j2j2n1n1M0
677A516k70K84K84k65M4J22j88K8K8j85J25J87j22j22J88J07k01J85j25j14J94j72J36j26
675A538j26K22q7k9l0o8K42k1k2J53j56J7k92N0L59j9j9l1l2J20l95K23q7J38J38j40j39R
673A516QL38l85R7R6k5k6j37j37J91j17J07J07J84j25n9n9P7P6j88j87K63m5p0K39M6M6k8
671A803k8j06j05r4r4Q0P9j18J91j57j57K67m3L5L5J34j74L1L2l33J83J51J51j15j14J05k04
669A435L63j53l7l6L9L9n8K51k07k08J92J92j94J15l43L79J59l57k2k3jjK05j04K25m98O4
667A416O3q8K22j0j1o8K41q8q8k0k0P7k33K33K33l34J81LMk93J6P4P4j6j6m23K98M7M6Q3Q2
664A685p2p3qqJ65j43K1K0KJj1j0j1j1o2o2K47o2O2k47rL01l8l7l8l8K30p9l70J46J17j92
662A416K07j02j32J78j5j5k9k8K29k86K97k19L8L9mlk3k2K17r2k8k8k01N20l37k8J21j89M
660A485NJ40J40O9m47R0R0r6K12j67J42m5m6K95k20q6q5R5R5o0n9p0p1K53k64j8M97n09K14
657A579R1k18%JN6N5Q8Q8k06L09j35J74l77o8M74m55j03K07k6k6J51J52k74K42j31J79l37
655A490k7K98m24p6K34M54m73K41o7p4p4J77l39J52j57M9L58J11k00k63K52k61K55klm4m5
653A542l34J81J31J31r4r5N7N7l04M18l47L74M6M5l66J49P1P2m81M47p4K34k84K6ppK28k86
651A530J77j33n1n2Q4Q3j14j14J44J44kjJ8J8l03OJ42j68K90j9l9l9J41j69K5K5j30J79K5
649A697K4k71L7M44k78r2K18j56j55O7O8p4K36l81J36j35J74l9K71k13R7k12k13L03L03l62
647A494J54j23J86l06K08k36P4J87J87l29j9O8O7P5k35L44j72R9k10J54j55k0k0J21j89J21
645A525J21R9k11l7l7J08J09P7P7mn20K99k16J96j13RRQ7k22M92m35k2K88Q8m27J43J43m4
643A582m4R2R2k36P2M4M4l4l3J25j83J12J13l22L99J3k97J6J5j59L57L8k72P0P0O4k45J03
641A596k07J13J12j0l19L28J8l87L34M3M3k60M9J91j18p3p3N42n92O65k63j35J74l28J87n3
639A577K56l11K05l15no4K46QPj08j09P4L83l38J77n8n9k6k6L4L3N2k57J72J72k48O3l41J76
636A370R1M01k31k30J49j60O77m57r7r6J54J55m06L16L1L0j11j11L19j96lL06k55k55o8K42
634A565J72j37kkj21J88l1l1k34K82rqN6N6k72L6J32J32l32L89k69k70O5L75o5o5Q9R0n4l63
632A362K04K04k60K56j5l24J11J12o2o2M8M7k62K54R2k18m3m4L53j62k8k7KKJKKJK1K2k11
630A378R9K73l6k17R3J70l45K68m1ll11K81k9m7K62j39j39N5N4j25J83l58J58%jK64m5P7k32
628A547n8n8n5K54J00k10j6j6J64J64l77L45o1o1j02j03l9K71O1k48n5K55j91J19p4K35o8
626A723l78L51M1o9p0j86J23Q3Q2k07J02j06K03rrk55N5J32j78N8N8L9L9m2m2J32j77j9j9
623A455L67l54k1k1Q8Q8M5M5j29j29K49o0j38J72m5m6J28j81J19j91l6l6O1O1O0O1k9k9k9
621A525k9O3O3j69J40p3K37p3p3n2n2l3l2K0L29k96J4K06j02ooP8k32J93j16J05J05k62K53
619A725j95J15k7k6j3j2j2j3J6J5j91J19K76k39N1N1jl10J66J67K89o39P0P0j73L44k37K79
617A665j24j24K37p2M1M0M1k69J46J47n49L79N6N5k08L07j8n34K20K20J49l68K52n8l6l5n5
615A505n4J87J87j74j74J19J20k94J7p3K37k46O3J24J24l0K78k13k14K31k85K50n9Q3k27K03
613A685j07k10L06k64K51j81J29qqqqJ32j77N5N5M4k66K38p2R0R1l28j9r4M22m09L12m9m8
610A554J51j58J28j82K96k20j96L20J7J7l08%J94l21K86K86l13K02r3m03J65J65k5k6m5m4
608A447L2k76L42j74K08K09k05k04J97j12j6j6R3R2k69M1K93k23k03L12K1K0K98k18j63L53
607A879J7k92J51l64RL19j59J50L4k75k7K83o6o6l2l2K39k77J19j90J26J26q9K20j08j08o0
604A527o0M9N0L34l89j24J86k82K34M7L56k83k83J68j42J23J23n1n1N4N4j20j20K62m7m8m7
602A520J84j25j31L84l85J29n0n1J58J58k55K61k71K45k84K6L4k76L17j99L09m13R6R6K51
600A728n9l9l9j19j18J7J7K57n1O4O4j92J17k4k5k21K94MNm5m4m4m4l3l3J22J22j0j0j85J25
598A601%jj87J22J48l68J99J99j42j42R6R6Q7k23K41k74m2m2J84J84n1n1q4q3K63k53L8L7
596A552jkJ86J85m42P4M1M1j00j01P4P3k08J01Q1Q2l4l5J40j70K9K9j19J91l79L44J4J5J55
594A816j55j35j35J52J51j06j06L4L4o2K47k6k5k6k5J14j95J85j24k30K85j99J11R5R5o1o0
592A649O3k47k8k8L23j93j86J23L07k09n4n4J39J39k61M9o7M48k15k16L46j69o7o6K12l03
590A435J41J41j52j52J96l19K55n4K24k92P3P3l65L56mmP3P3l49J66k1K89k83K6ooK40k74
588A480o3o2R3R2J6J5n8n7n8n7J60J60j69J41p1p2K39k78J48J48j61j62J52j58lmJ49j62J10
585A508J10L80n48m5K64m5m5poj24J86M3M4k82K34n6n6j06j07K55n4j92L24o3o2j23j23M44
583A748J34l87J28n9n8J45l69N00m27K02j07RRP5P4P5P5p5p5KLp1p1Q3Q4j56j57K69k46K17
581A574r1O9P0k24Q6L50l72k22K94o1o1K72l6j34L82k90J9k7k6k6K83k91J9j80L35K0K0k74
579A478K42J32l83J43l72M01j15K16l00q1K28J49j61J%K14l03J81j28l6K74k48O2R5R5j43
577A641j44N8N7J73j36k00J09P0P0o6o7J46l69R4R5j12j12K11r9K56k60L31j84j20J90j3l23
575A296J29J29J00R9j77j78K44o5K24k91Q0k30J83j27N05m24J25J24m29K94l5l5J46J46k86
573A547K4J09J09l23j4L02qj31j31M13n16M71k52J38j72m2m3R1R1j80L36k42O7p4p5J07J06
571A708m9m9q4q4P1P0J19J19j39j39J8J8L7L7k56N4J4J5K48o1j45j45R7R7Q3k25K87k28M3
569A531M2j2j2J42J43j22j22L3L3j02j03K26q3l6l6J00R9q0p9o7K43l19J97j71J39J44J44
567A872n33J88K33k82P2k37J31J32k36K80j08K02k69M1J84J84l25J90j82J28l3l3K7k81J50
565A495J51M6M7K0k88L67l55K44k71K6K6poR0R0k06J03k14L02m6m6rrj83J26R9R9j78J31j14
562A530M02o56O7K29q0J58J59l28j9Q4Q4r7K12j16j17j00j00J38J38J42j67j3j3J23j86J42
560A616j68K78l1L9k70J68J69l67J49k81K34k4k3N7N7P7P6j87J22k0k0k80K34n5n5rrJ45J45
558A767k5k5J93n28K33k83L94Q5j33j33M1k68N17m11J11J12j81J29m5m5m7m6L79l43p7K33
556A604j9j9k70M51k83K6pqk40M82qrN6k54J4J4J49j60N7k53J60J60j02j01L4L4K31p8l9l9
554A583j75J35j42L73m14J02p3K37l6l7j60J50j13M02n6n5m99O36j57j58P9P9K08j01l90J25
552A543L77l44l1l0RL17j46j46j65J43L26J7m22R4r5K15nmm8m9J45j64NL14k40k40LLJ58J58
550A698j55j54k0j9J74j35M45k77j6j6Q1k29K87k30K2K2J56j54K72l8j28j29J10J09j46j46
548A384o3K47n9n9J16J15q9q9l1l2K04j06J38J39n00O33m56j46L34K4Q3Q2k49O0j79J31L30
546A962l92L3L3m0m1o0o0J72j38L7L6k1k2J66J65l56J59M4M3j21J89m31Q6N9O0q3K28k41k40
543A226L14NJ11J12k88k89M08R9q9l97P58l76k02L13o0o0K62k54J5J4J10j98K94m27J14J14
541A629j5j6l5l5Q1k28m2K68k73K43rrj64J46K62k54n0n1K65m4k89K0K71k44J14J14J01J00
539A856k82K6QPo4o5J10J10k87K3J06J07MMJ98j12j76J33k34P5P1P1R0k19J20j90L13Ll00
537A506RK79k36q1K28m23R3K10K10m08J07k8k8j5j6K32p8O3O4J32l84R2R3k56K60n0n0J66
535A691j43j4j5L25l98j0j1K54n6l7l6k7k7j62L54n3n3J54j56KJo4o3L49l73L04k11J46j63
533A508K68k47L4L3JJj40j41M7M6j69L46j18J92j6j7m03L19p4p4J06J06P5k33R5R5q9q9O6
530A528O6llmlj0j0K61k54O5k43j8K91j28j27L36j79l2l2r6r6K39k77O32n02K79l1m17R9M11
528A742l11Q8L99j28m38K40K39l28j8R1k18M80k43j32j33K43o7N0M9j37J71k53M68k47k47
526A360L46j70K8K9l33L89l4l5j64J46L3L2J87l29J5J4r5K15o5K44l35J80j64J47MMj60j60
524A329J69j40N5N6L27j89OOk7k6k2k1N5N6j38j37K10r9k13R6P0L80k8l38L0L0JL11l28j9
522A462K54k63M7M7J68J67k64M5j32j33J06k03L47j68J03J03j9j9j16J94j26j25J91j19K27
520A774k89O0N9q2q2K85k31opn8n8L25J6j00j00L45j70m61M67k33P6L7L7j8j7k50K66K18r2
518A711r8r9k81M40k55K60k17k17L63j53Q1Q1M9M9k12k13J88j22M19r6l42l1L9L48k00j99
516A293L30j85K09l08M60n6l01Qj1N05m23j14K79l0R2m23J81J81j48J62k93K23m8m8l1l2J04
514A576J04K3k86J27J26l7l47K92j8j95L20J2J1j80j80J81J81p4p3r3K16j74j73K33p7L68
512A863l54L2L3l6l7l07K09k8K81k09L07k74L7M9M9n8n7n7K52j76J33P6k34LLj7j6J06J06
509A679k23Q7%jJ9J9m5m6J47j62OL15l23J92j22j23j09K00k8k7J46J47j53j52O0O0Q1k29K49
507A664o1Q2Q2j70J40k07J03L54l68k0k0L2k77R6R6j30J80Q5m32J94J93O2k48K48k67n3M62
505A820j11j12J07k04K42o8k13R6j43J67k8k8j82J26L5L4J5k94M32q3K7K6j52J57r4r4R3R3
503A664o8o9p0K39j87J23p7p7K0K0m3m2L5L5K1K0j21J88k71K44j43J67J93j17j23j23K25q5
501A578J09J09j63J45k60N0n1K59j28j27m6m5K05j03L8L9J9K0j15j14K07j01n4K56r8r9K57
499A787k58J74j36K38k78L8L8J51l65J05J06nnk94K20L0K9J6J6l08K07J68j41J59J59m54O3
497A460K10r8p3p3R8R8j22J88l39J77l7l6J85j25j06K04j75J35j17J92klJ72l44L96n32O92
495B025k36l88J26L1L0r6K14k50K66j2j2k4k5k84K32k52N8K20q9q9K21R5k14J33j75K62m6
493A721k60K56p0p1K90m32M5M5K97m26L99j16N0N1j03j04k00J09m0m0K31p8l0l0O0O0O8k41
491A441J84j25J65J65j38j38l3l3k6K82p4p5n6n5j7j7j7j6lkK55k60M57n9l95J22J00k09K68
488A691k47J68j40JKJ51J51j07j06j3j3O5O4p4p4J00k09N9N9k57M65k33K83k91J9j0j0RRL6
486A548L5l52L70j19J90k68M1J05J04j92j92N24m03L50M1l4l44K42o6l9l9K32k83N0N0k1K89
484A819J3k96k19R1R7k12J55J55k00J08M5M4k02L14q6q6K77k39k6k6O7O8j20j19L17j99o4
482A476K46k08J00l4l5j17J92n04M24N1N2K39p1l60J56J04J04k65k65K70l9n9o0P7P6n3n2
480A445M31k92jjL1L1J2J2J2k98K48o1J13j97M5M6k32K83j72L44k75k75J47J47m6K63J20j89
478A691MMj01j01K67k49j0rm2K67k12R6j93L22j25j24j5j5o8o8Q6k22K20q9M6M6J88j22j02
476A370j02J94J93q9K19l62L59k72K44n21K02J75l40L22J3j74J35OOJ66j42P4m40J91J91j8
474A600j8j14J95o3o3m4K66k29P9LKj31j31K94k22K12r8j30J79J18J19j47J64n28J94O5O4
471A636RRk24Q6j06K04L6k73L89j26RQk12R8K52n7q5q5k6k7R0R0l23j3OL15k07L09q4q4l3
469A581l3k27Q2K68m1k88K27j02j02K21q9q9K20j85j86L88P9j53J56n7n7O7k43k05L11qqM4
467A571k66K02K01j27m36K98j1n0K60J13j97J71j38k3k2J32J32l04OL2L1l13M08j52J58k44
465A432O6O5O6o0o0m7K63k72K44k79M44r5r4k43O7P8k31L23J3l08K07j03j02J73J73j23J86
463A783l07K08m2m3k02J07J08k03J27J27k22Q8O4O3k46O4J40J41k72L8M2M2p3p4o1K49R4k16
461A524l7l8R8R8j63j63M94m34K66m4P2P3j25j24L1L0L5L5q8q8k32K83ppO8O7j90j89Q0Q1
458A406Q1Q1j10j09M5M5P5P4o1o1j8K91p0p0J98l18j96L20K42k74j25J84j3j3PPo7o7L19m02
456A401K26q3M6M6p3p2Q2Q2o9p0o9p0J13J13m10N19o8o7RJ0j66J43o3o3K76k41N0N0J07J06
454A795k03J06k15R3k9k9o6M50k21k20J43j66J63J63k08k08K82k7K49m72J72J73j20j20l6
452A449K74q8q7Q6Q7j22j21j2j1L55l66O0N9j40J70k3k3J2k98K90k27L16k01K6K5K42k75l
450A454L05j70j70J06J07k9k8k9k8K3K4M3M3k66M3m7K62ook96J3k3K85k3k4m4m4N3N2j84J26
448A522q1q1M31q4k39K77o0o0k41K75rrj51J59j3j2k25K90M3k67j76L39j63J46J01k09M6M5
445A594K6K6j43j43R5R6O9k40K43k73J2L20k14R5L8L8k13L03k26Q3j74L41k06J04J17j92O3
443A639k45K05j04J97l18M9N0l0K79j52j52K22K22l12lJ4J5o3K46j00r9P4P4nnJ5k95O8O9
441A555Q1Q1l07K09j97L18k47O3M4M3l35L87k90K25j45J64l07LJ43J43k24K91Ol03OL16j82
439A541J27k98J1K78l1j85L30k71L9j81J29p0K39j73j73Q8Q8L20j95k10R9J51J51o5o5o6o5
437A543J8J7O2O2J74l43Q4Q3Jl09J43J43k34P5P5P5k45O5J80l35J34J33K5K4O7O8o8o7k05
435A445J05K40o9m4l53J63J63j58j57L90j26l3l3L2L1k04J06RRj1j2j27L88j80J28K0J9l89
433A352J26R4R4n1n0o4l73M51o5L3L2J93j16k25M96n42J79P0k39R0Q9J09k01p0K39M6k63J52
430A586j57J72j38P2P3q2q2j26J84o8o8K0K0K0K0J63J63l78L44l72o2O6O7L9L9k5K84l73J43
428A544J31J30m1m0k92J7P3P3J70j40m63M64j15J94j3l23K00j10jkj50J59L31j84k04J05R3
426A606R2k36P3J39j71k3k2j62L55m77K45j42J69K90j8q2q1L24l97j47J62R8R7j82j83K23
424A550K23l37L84j76j76J56J55l92J23M3M3R4R5l36k6N7N7%jp8p8N4N4j39J70k41O88k99
422A667k99J67j43L02k13K2k87L58l64N17m11N11m17J58J59j57j57P2P1j73L42J05m11K40
420A659o9N0N0m7m6n8n8r0M25q5q6k72L7L95l27O6O6K61k54j20J91j77J33N6k54K64m6k01
418A463J09j57J52kkJ36J36k44k44K56n3J40j69%%j54L61j30j29jjn8K50k52N7M6M6K7L35
416A918o51K76p2p2K4K4M4k66K56K56r2r2j21L94j22j22j98L16m95M33n7n6J76j34m3m4P9
414A559k30K87k29K15r4O1O1j13j13J43J43m37K85J98j11k21Q8J3J3L23j93p0p1J55l60M15
412A717j00j91J19K91j8j8n34J95j14J05J05p4p4O2O1J78j32O1O2k29Q1j13J97m8m8k9k8J42
410A626J42j15j16o1o1O8L78n25J97j77L39l28L94j16j15r8K12m0m0n4n4p4p3K12r8P6P7J3
408A589J3J4J3NNj10J98K3k86O1L71o29N04k88K2K2K2J76l39J67J67j23j23Q6Q5j72j72J61
405A462J62K77o51M61k61RRk7k8J27J27O6O5j9l28J31J31Rl01J78j31J21J20k21Q8k01J07
403A482J43j66K97k17J65j44j76J34q0q0L06k08n0m9P3P3MMMLM3M2j50J58J16j92k84M39K12
401A902l05J67l49N3N4p6K34j57j58K94j6n6n7p6p6J00J00LL12k29k30L70j46l09K07K0K0
399A596J26j83L13k03j85L31j46j46K8K7q8K21j28m38O26r6o5o6M5M4j23j23K90k26K54k60
397A425J32J32O2k48J00k09N2N1J4J3J34j75K50n9l9l9n9K51k92J8q0p9K38p2M5M4j97J13
395A526q2K29n2n1j67L48q7q6p4K35k9l0m16L05m0m1J78j31k2k1J91j18Ml05L65j50K29k86
393A422L00m22K69K70j37j36r5r5J83J82k77L3J10k00K10K10m54K68j79J31KKQ2Q1j76j76
391A408J22J22l80L41O9k41J1J1j68L48r8r7R2R1K40m82M4M5R6R7j42J68ol15K05j04k40K76
389A513O6O7J18j92K2K1K1K2j16J94j54j54J96j14M1M0Q0k30K2K1q0q0J78J78r2r2J66J66
387A828k08k08K04j04J49j59J05J04J89n34K02j08K14K15l85L37j7l27K8K7J07k02K81k8K1
385A731k87K15l01K81k9j96J14j09K00j2j3o6K43l76J40m9m8j13J96ONQ3Q3M3k67K75k41J81
383A689J80k96K19q8q9j72L43l32k2J65j45O8O8j77j77P31m03l26L97p6p6O6O6j30J80j29
381A534L86k51k50J43J43p5p5j13J96Q3k26Q9R0J28l88L08m14J44J44J18j92R9R9l65J50N3
379A558N4Q6Q5q9q9j09j08L81P2k31P8J96n25K08j00J88j22j08K01k13L03k64M57l00K16k03
377A622k03J79j30k1K88k87K29p4p4K23k92J72j38L9L8J8J9M0M0J36j73N8N7k20k19K06K07
375A740k06J04j58J52j38j38M96m32J67J67j42j42J3J2M1M2j33J77J2J2J3J2J11j99PQk10
373A388L06k56N5K15r4n5n6QPQPN7N7r8K11k00J10j99J09j98J10K78l1j49J61K5K5n31L97
370A667J7k92L07k08j5j6Q5Q5QQm8m7j89L27k44O6l8K72l63J53J84J85l57m7o7M49n88L41
368A635j10J98k84K31k13R5K9K8j14j14m5K63R0Q9j40j41R1k18K41o8K15l01K03l13M08l13
366A442K78l1J43j67r9r8L00k15J0J0L6L6K56n3m65K56k2k3j32J77j20J90j96J12j84J26J25
364A692j83J83j26j6j6L25l96O8O8J44j66Q5Q6l3l3j55j55L47l74pN08l10jq4q5K35p5l0l0
362A466R8R7k05J04L3L3n8n7j77J31K29q1n7K53l15nJ35j75N1N0k11L03m4m4q0K29k2k2l5
360A624l5q7K23n23J99L86j29J2J2jjj59J50j78J30k23Q5j33L82K97o30l8K72k26K89p8p7
358A543J66j43j43J66l7l7J76j33k35P6m1K68j57J53kkK1K1l79J38L14k01M3M4J9J9j75J35
355A617K01j09k63K52j29J81j94J16l25j6L19Rk29K86m9l59M26J17j86j86J96j14O1O0o8o8
354A546j01j01K72k44J75J75j88j87K83k33J58J57l12K03Rl00M10l13o8K42q7q8k5K83j93
352A473J16o0n9K82k8j44J64k22Q7J11j99j9K91k97K19K5K5j39j39P4P3k31K85k5k4J78j31
350A686q6q5J09J09j55j55J78l38M23r3l6l6q8q8J52j57P5P5J14j96J07J07n3n4k2k1j81L34
347A625k07J03R4R5k54K62q7q8n5n6J10J10j93J17j0rq6K22q8q8Q6k24K05j04K24q5k2k2j38
345A437J72llo0o1K4K4K4K4L2L2l16K00jL08l94q4P5P5l12M10ONp8p8L8L8NOK21k95K46o2
343A655J1J1m20N07k50K65l73L48j26j26K92j7k77L2q4K25j58J52m9m8p3M43k85K4k39P1R6
341A607R7l5l4l4l5J4J4K07j02j62J47kl10J03J03J30j81J9J9N7N8J2k97j4K96r6r5J04J04
338A694j60j60J75J75j33j33K86k30K9K8j59J51j74J35J3J3j71L45lmj58J51l32L89j97J13
336A683r4r4J45J46l44l6j07K02j59J50K22k93J25J26J5k93j0L00o7o6J59j50k42K74M2M2
334A676j25j25j18J91k0k0J73j36Q8Q8j12j12L3L3L3L3n1n1K01j09m5m5K26k89K2K2M8M9R6
332A654k13K64m6j47j47K78k38J56J55l1l1q4q4j48J62j37L78j69j69K62m7J59l57M7M8q1
330A434K28N2N3q3q3p3p3Q1Q2n5n4rrK74k41k9k8J58J59l70J45m3K66j01j01j88L28j17j17
328A486N7N7r8r8J72J72l95J21J88j21j2j1J18j91K53n6k49O0K1K2L3L4JKK64k52l9l9J01
326A601J01k02k02M44k77J28J28j58j58k3k3K34p4p5K35o8o8j83L32r5r5j2l20M94k27NNO9
324A516O9qqR4R4j44j45o2K47j0l20J25J26J25j84J79J78m33Q2L00m22J27J26k78K37n3n2
322A506M5M6r0r0m1K68q0q0P2k38R2R1P9P8R1m24K55n5Q8k22K42o8J91l25K32k83J29J29j16
319A522j15K13r7J33J32k15R3j28j29J49J48PPk64K52j73J35J4J3l22j3M31q4J43l72l8l7
317A405P8P8R7k12L5L4K22q8k31K84j99J10q5q4M4M4j15M01j98J11j84J25K2k87M14l08JK
315A516k5k4J69j41q9K21j28J82k01J07m7m7QPr7M20k52K63l23j4l5l4K55n3k33P7Q3Q3k94
313A354M28j0j0J92l22l3l3N8N7l48L74o2o2j45J64k80M41k74L5P7P7n9n8p4p4p4M41l59J56
311A577J31j79O4k45J67J67p5p4LLj7j7J58j52M4M5K77m46J07J08k09J00K01j09k64K53o1
309A557K49k21Q8m2m3J51j59L3L3j80J30K8k82R9R9k28K88j18J91P5k35J33j76J34J35k21
307A518K96m35Q1k2k2J70J70l77J37j6j7j39j40K37K36m0m1J48j61J2J3ooR1k19J30J29j99
305A528J10j66J43K39p0j00j01L5k74K60m9m8m9j0j0J96j13j74L42k38P1l62N66m39K82kl12
303A255M55o0RQj00j01N9N9j8j8JKM6M6l55L67k13R7j06j05K43o6j8j8J95l20K2L32r3m03
300A202M28q8O1O0l49J67L2L1J7J6k73K42ONP6k33k5K84J4J3q9r0Q5Q4l6K74l65L57m01r3
298A412J72J72k61K55K35m86j13J97k3k2l8l9K52k63K7K8L25l98J14J14J02m15N5N4K2K3P9
296A580P9j14J95l9l48K58n1J10j98K84m37K35K35k56K61j75j74p8K32J34j74j36J74j75J35
294A557J54j56l2l3K05l09L29j86j03K07K3K3k47K68j00j00O7O8K6k84L35j80M7M7j85j85
292A256M69k52K11K11o19L08J15j95lkL6L5J31j78J5J5q2K28n6n6J25l91K28q1ppJ28J28O
290A716Op2p2n5n6K93k23J08k00J14j94Q1Q1O2O2MNj70J40j5j5j69J40L3L3P2P2k44O5M6M6
287A694j08j09M6M6k1k2j89L26J97l19MLk7k7j05K05l00J0K68m2J10k00K51m70M10j06K74
285A799k41o5o6L34K5p3p3r2r2M0M0j15j14J76J77K1K2q7q8O7O7j04j04J2L22l17J99l9l9
283A592j68L49r7K13k41O8k80K9L20J1m60K63N2N3o11L17K83k33J16j94K01j09K59k56P9P9
281A635j08j07O5O4O5O5j23j22L67n60M17r8m1K69q7q8j64J44K4K4j12j11R0Q9q4q4K64m6
279A647j48j49L09%N2N2k89K27j40j40K08K08q1l92K33K32p7l86J85J84l11K04K04l11K23
277A744k92Q1Q0k9l0K0J9J9J9r3r3K36p4J43J42m06J11o8K41k61M8J38l77Q7Q7n0n0K97j1
275A678j65J45l00J0K78K77l73J42J80j30m84K37J5J5k68M1J76J76q1q2Jl08N17Kj0j0j39
273A540J71o8o8R3k16L81j34J37j73P7k33K82K83l14l14K22q8K1K2j8j7J20j89LMj57J53K10
271A730r8R9k10R9J00l8l7n7n7Q2k28p3K36J31J30j40j40M36p9l05Nq1K28k17K98%jk27K89
269A875k65K50m14L08l4l4k78K37j8j9j60J49J4J4N3N2j70J38k09J00l8l7o9K40k41M80l00
266A624l00M76m1j30j31K17r3p4p4ONJ60J60n3n3k65K50j02j03J49j61K99k17J82j26j94L21
264A732j43j43J85J84m1m1k95K22j46J63j25J84j25j25P8P7L3L3l31J84j25J84jjL7L8k06
262A486J05Q4Q5j63j64L78l43K41o9J00k10j65J44Q7Q6K0k89J62J62k56N4K67m56K54n5nm
260A536R1R1q3q3K58n1Pl03L75j42k5k6o9o9O7O6J15j95J54j56N6N6J53l63J79j31J1J2N3
258A584N4N4k56J22j88K95j4q6q6K23q6L3L3k57K59j13J96l90J26O3O3m0m1o5K45J3J2k43
256A510O5O6O6p4K34k35P4l32J83K61m9k18R2k38K79q3q3q9K21J74j35p7p7j18J90L6L6k75
254A404L4K92j8p8p9j4K95j77j77O8O8K26k90j9K90j3j2j3j3K2k86L19Rj55j56Q3Q3k00k01
252A292K96K95k65K50n03J2K63m6J47l68M91k31j1j2NNMNP4P5r9j00K15r5p5K34k25Q3J09
249A825m06M36p9J1k98QL17k56k57K68m2L5L5K23q7k42O7N3N3j85j85J78J78N6N6j41L75l47
247A649l7k2k3lko1o1K48o1J49j60ooonoojkJ98J98n17K04J27j82nok5k5K4K3K4K3llJ6J6
244A665j24J86l4l4j72L43q2q2j12J96M2k67J0RJ65j45J5J4K8K7k34K82k60N0Q9Q8R5k15J72
242A715l44K93k21J15J15k08L09j13j13P3P4p6p6R8k11R2R3nmj16j15K97j3L9k71L8L8R2R1
240A686j60J50j40j40L11KMMLMk55N5J19J19J54j55j16j16q7K22j07j06J45J44j13j13p2p2
238A370M18r8k57M64n1n1j64j64o1K49j34J76KKJ24j86j1j2J69J69l79J36M5M5pl16O6O5j66
236A443L49p6p6m4m4n4n4J98j12J68J68M5k64N5k54J52j58M7M8RQN1k59M76k46K3K2P4k35
233A460Q2Q2O3O3m6m5o5o5J48j61J2J3J05J05l20M02k4l33K67K66l74o4K07l10J30J29J3k96
231A444J99J99J80n42K68m53L52j63J02J03l9m0K22k94P4P3K6K6K6K6r5r5Q0k31J81J80k70
229A539L8P3P2R2k17K04j05qqj24J86l4l4k24K91m05L17OOL22j94J3k96m4m5M05l17J85j23
227A571K3K2J59J58j22j23j41J68k2k1q0p9Q3Q3r1r1K71l9Q3k26p6M40m89M40n06M23j06K03
225A915l20J96k50k49L01qJ1J1j4j5J60j50O6O6k12L05l24J92O9O9O2k46K36k79j50J59J27
223A728j82J70J71J96n25J06J06k30K87j%K64m58R3k17mL06j45j46M8M8p8K31K32p8j53j52
221A617J4L24n6n6k23k24K56k60K04j05J81J82l86J30J63J63l72o3K45k71J17J16m5m5m5K64
219A825j66J44j2j1m6m7J27j82M7M7QQK08j03j15j15L57j58l14K03J5J5l0k9K3K3j70J40J46
217A838j62L0L1o3o3J31j79L6L46k79L0K1K1N9N9k22Q7q6q7N9N8j16j15K06j03P0P1J3J3p
214A697pL3k78J93j16L26j91J58j52J56j54R8k12R9R9K2K2k43O7M8M7P7P7k53N8M4M4j88J21
212A692N9N8j09j09L76j40M1M1l45L78l96J20K6K6o4o3j29L87m05L16J7k93L78O8k03J07l31
210A503J84J57l59L90l33lL07m7m8j79J31J30j78O9O9j05j04K01K02m49O6M4M3r8K11q3q4
208A637k12N09j48j48K45o4j37J72k1k1j17j18NNK17k99K62k54K71l8p0K40p8p7n7n8p7p8
206A491J81J81q5q4R0Q9k47O2M3M3j0j1Q7k24L4L3J3J4O9P0q6q5llK09l06J42J42ol15L22
203A850j93%%J03J03k0k0l07K09J90j20o0K50k02k01R5R5j95L21r5r5k56K59j71J39J19J19
201A917K6m89J81J81j35J74k83K6j74N47k00k00J57J58k87K28j5j5L6L6k37P2K26q3q6q6k
199A673L07k83K7j09j09P8L87J30j80j17j17J8J8J1J1q6K24j8j8P9P8j89j88L39l82K82k34
197A632K04l11K57n3Q9Q9m1m2m1m1Q1Q2k1l31K63m7J07J08j97j97L84l39n0K59k44O6L20j96
195A790m1m2M8M7j07j07J23J23J62j48l1K78l67n7K96j4k64K50n8n9R0m26L36K6k77K39o9
193A741o9L30j85J3J2J36j75K25q4k58N2j%r7K12m3l54J31M39o6o6o6o6J47j63j43J66j11
191A657J98j43j43L61j55P8P7j78J31J32j78M2M3k34K81k81K34j78J31j84J25p5p5L03m19
189A550K45k70L09k06K26q3J9K0j9k0J55j54N2N1k14L01j82J28L8k70R6R7k01J09J67j43J32
187A933j79k3k3K0K1n7K53l55m6L48j68KKJ11j97K63k53J92j17J7J7l5l5K85k32P8P8r8K11
185B013k92J8k1k1l4l4L70j45j0rJKJ82l34K69k47J86J85k02J08j82J27O9k40m6m7J45J45
183A956K74m48M3k65K94j4J8J7k1k1K8k81M14n13J92J92k1k0ppJ48j62J24j86P9P8j65L50
180B076k37P3j99L16j28J81J2J3k59k58K49k66J01J01L7L7L7L7P4P4j13j13K04l11J66J65
178B069l75J40J01k08J00R9J6L25m36Q1J38j71O1O2j45j44L00k16R4k15J17J18J37j72k11
177A665R9P9P9k00J09k01L15p6p6N2N3j78J31J12j97K07j03k37K78j2j2j74J37J74j34N9N8
175B007n1n1n1n1J1J2L02k14M7M7q2K28j17j17l4K76p25O15m2m2j37j37J91j18J53J53k53
172A820M69m15j05NNK04j04q6K24k24Q6J88l27K98k17J94j14J68j42j9k0K32k85K58n3j05
170A935j05j76L39J12j97j46J64n9K51l29J86k38P0Q4Q3Q4Q4p2p1N7N6p9q0q4K26k6k6M7M8
168B138k10k11J43J43k32P9M76k44k65K52q4q4P1P1J31l84O0O0M1M1K1K2J34j75J8J9j46J63
166B048k04J05J01k08J20J20N3k57K85k31j6j6L19j96l2l2K25k89J81J82k82K7N9N9nl15J4
164A815J4K66k50K12r7j3j4j42J67j43L73j24j25M3M2K36p4k48O1J32j77L26l97K41p0KKn7
162B001K54j79j79J19J18o8o9K74k43K41o8j62J48o5o5O9k40J1J1J31J32K80m42J4J4l1l1
160A975J48J48j36J74m36K87N4N4j19j20M41k80j5j5q0K30p3p2rqJ28l87L67j49j72J38L37
158B410l85NOK18K17j48j48K77k39J09k00L29l94K10j00M8M8j23J87j74j75K75k41K43o7j38
156B050J72J33j77K18r2J79l37J32j77J71j39L58l64rj0K86k31J76l40L61N2k32K84k48O2
154B278j00j00P9k31K45K46l44L78l37k8n8K51P1k38M19l03j03j03K84k31r6M19J43j67j16
152B258M00j84m93J19J19k45M76q4K25l25j7k03L12j5j5j24J84k83K31L8L9q9q9L3L3J58l58
150B101L58j58J61j49k00J10K72l8j01j02L8L9n8n9K02j07j40N83n46J76O7k43J9J9J74j35
148B283O5O6K7K8p0l80L49L9j73J36L17m05K10l06K4L32k8k8rrK8K8M8k62L3L3j9j8L94j21
146B612j98L17j96j97P4P4K06j04k20K96o1o2m9m9J27j83qrP2P2M0M0R3m23L12k04J4J4N9
143B459N9QPQPJ7J7R5R4o4o4k00L16qqM4M4k91J9J73j36p9q0J78J79k00J10J4J3p7p7P8P7
141B732n0n0j02K07l13M09J96j13k73k73L39j76K87k1o7o7K83k32P8P7k55N5l5K74j33j32
139B645L31j84J1J1N7k54K87k3j97J13Q3Q3j9k0k28K88o1o0j4K95k39k39J57J57j7j7J98j10
137C034N1k59K85k30O0O0j37J73j56J54j38J72j57J53j8j9m05L17J71J70l19j0J64J64j65
135C115J45O9k40J07k01J75j34K78k37L13k04N5N5M4M5j09j10N4N5N5N4OPK5K6k11R8J94l20
133C209J17j92L62j53J79l37L65j50L7L7K95k21j0j0k3k3o8K41l06LN46j76j37J72l31L91
131C817j05j05k44M77o5o4j10K00j28j29J98J98k53N7K37p3k52M69k87K28MLk74L5K93j6k41
129C870k41K04K04l8l8R7R8J78j30k47K69r8r9q5K24m9n0J45j66K02K03p5p5onL29j85k64
127D172M59K0K1KLKl06K38p2M05j10k32K84l8l9N9N8j93N28j67j67J54J55j74J36J36j74P2
124E232P2K1K1L39j75m1K69k65M5M32k90K28q1q7M29j89j88K24K24j33J75L31K1Q6Q5R9R8
122F982j66L50k49N9L7L46K11K10o0K50J07J08p6M39j02O20m1m0K62K62L13L12K29q0M31M32
120A1146K06N16N24QN75N75L75L76N11N10O23L12Q74J52P61M51M45M45K35N45L58M9L42j74
119B0740L87j28o5o4l15M06m31Q4l16l15j66j66j66j67l04l05k7k8l58m9K09j00j7j6q1q2
117A8160N56j66N11nK46o3N56M0L94R10K6P48M49M49O67O68O37R46P72P72J020J020J021J020
115C1354J103J104J278R68J132J131J176Q67J201O85R88M73M39M38J88l28K68m54n43n44p84
113D2140p83o87r97r53r53o82j198p75p76j272n50p39m30q16q16m37m38r21K14n89n89J45
111B7098n76r9r9K16r2l43J72J22J21J66J66M95J86L95L95N50N49L55O64N48N48R76O67J015
110C4195J014O88R97R26M10J160O44Q18N09O87O88M49o6L65l56k53N7k76n85q36l20q36q35
108C9244p26p26q82q82m57r72o14r24o65l56q32l16q57l42m68j59q03q1j72m81k49O0l71J44
106B7113k43O7J75j35L9L49J38J38R2M02N89j33P37K21N02N01L92R07L28J255K37P53O09R18
104C5951Q60J170P38P38R95R96J012P04J051J051N42Q51O78O77N38N38N37N38P3P4M02R3K85
102E1092K86N23N24N43N43L69j47M0M1n92n91l72q88q55q56j231j232j888j580j283j592j193
101C9661q83q27n17m15m14k02k02K4K4M50o6L79L79N45N45K49R70K07P23O45R54P14M05J307
99D4655P92J088L67P21P21Q66N57P50M41M29M30L26J7k44k44k63k63o08o07o71r82j148q39
97D6291j175q65j464r49p88j097r87r87p30p30n64k54o22l12K68m2J52J51O58O57J186J496
95C9293J337J853K098K408K282K592L107K591L062L372L996L997L629K908K308J42j713l467
94G5795m517n445n237n238m226l916l227k299k247j525j122j430r54r54n85n85q42q43p14
93B9889p14q11n01p86p87m96j012l99p07p20m11p31m20p50m40n77n78m22m23j91n00j91p06
91A6616j60j59k12k11J8k92l56l57m9K61m81L4L5k74M60k62L59j57K87K88l0O92K54K54Q95
89A7453L80P47P47J103J102J477J168J499K221K808K807K937L452L400L401L171K863L023
88E5759L539L687L996L971K837J281j296k624n202o362o052o195n472m699m182l191k674k179
86B4942j663j334j334j052p43r81m66l22q38k84n93Nl05m40P5j64j65j51j52K99rr4M22o2
84A4591M55J96J96L74L73L92L93M78P87O91J75K58R81O52O52J78O94N6L65J30j80K27k89j16
83B2709j17k84k84m06r8k71k71QPj66J43J32J32M02R4M62M62Q94N85J007J316J587J587J909
81C1539J909K026J509J166Q56O05K96J21J22k85j006j164j474j467j467j667j151r07r06l36
79B8319q52l04l03p2p2n2n3j52J57J57j53M28M28P9L89L82L82J49Q72M72M72O71O72O96O96
77C3408J076J076P95J106J085J395J709J193J328J638J508J509J683J373J470J161J038J038
76E6589N39K29Q1k28l96r11q28j137q40q41j034j034p31j040p31p31k41n51o66j51j92j91
74D4964J4k94L98L98J21J21O22O22M28P38Q25N16Q12J122R79J289J456J972K043K764L145
73F5055L145M266L957M853N162N942O251P669Q185R282J0210J2336J3471J6127J9529K5007
71B20447L1916M0671N4179O9776O6992Q2098P3952L4419K8130o380m4224n5296o6948p1924
70D57808o5427n6663m6660l7477k9951k3261j8620j4773j1989r578q444o844o122n349m627
69A12023m111l802l434l435l251k735k768k767k877k877k910k393k641k641k229k228k145
68F2779j835j945j636j265j574j123j124j084j085p94p95r46m31l92p01k70k70k89k89J37
66D5068J36j86L30M52o4O91L81O45O44O25L16J173Q63J237R28Q61J583Q87J403Q99J209J003
65F1084J313J467P45J158O43J132M10O17L07k7K82k91k91j11m21j62J47N03N02Q64Q63J592
63G2326J282K423K114K871L181L528M044L889M818N036N758N894O409P311P620Q329Q845R587
62A65265R895J0501J0501J0643J0644J0121R605Q478O930N190M054J748nj945l080m923n644
60B47978o647p368p388p904p491p490p060p059o329o329n711n195m898m383l971l970l125
59A45660l124k423k112k029k029j391m63j087j58n5n5O60O61J350J349J663J972K075K590
58A43054K842K842L235L235L773L773L928L928M536M537M505M504M149L633L665K943K483
56B05565R36M59j501j827l169n024n746o391p318p822q337q768q460q665q150q208p693p306
55A02575o583o810n674n521n004m966m038m063l549l055l364k623k623k134k649j863j862
54C6194j887j371j403j403j306j307r78r78p50j266q22q21o41o41o22r31l56l56q20l04m75
52A6756m75o17l08k15k15o27l18k89k89n1p72K58k57n48k38k32k31l87p7k47k47p3l82m1l50
50I528m1m1k64k65k6k7r7m06J92n29j83J26l64J52l28j9J3k96J20J21l30k1j83j82j82J27
48F595j04j04j30j29K95m26j49J60l65L57j85j84j98j97P9Q0k25Q5r0q9J6J7l05K10J09m07
46D716o5o5j62J47J28l87n6K54l65J51l13K02Q6k23J60l55J86l29J67j43J9J8j70J38k09J00
44C630k6k6J3J3l72o3l0M85l69J47l69J47k92K25jjl49J66L21j94o1o0Q1Q2k09J01p4p3j05
42B737j04q6q5p3K37p9K31l12K04o6o7m4m4R8k12L20j96k74L7J84j25p4K36l47J68k06L09
40B367l28J87l54L68J74l41K84k32p0p1K07l09mL05k10R9k14R6K12l04J49j61J4J4k06L10
38A982K0K0o7o8o8o8N8N8j29j29K98k17P2P3j12j11P6P5k56K59l1n46M78l8l46J69K49n9k14
36A428R5J24l91L43j72J87j23j74J36J51j57m9m8l20Q14n91J31q8q8R2R3Q4k25p0K40j58j57
34A107klJ81j29M5M5J09J10l22j3N3N3P3P2l4l3n3n4J55j55K12r7k61M8K67m2P1k38o3o4q0
31I58K30K10l05o6K44k71L8n3K57J9k91K70K70l68n8P6L87n36J86j46j46J83j26M30k91p8
29A023p8J83j26M8M8q7q7j07K03j4j4NOL4L4j39J70n9n8K70k45k16R3O0O1j79J29J30j79M2
27I51M3K3K4o1o1K29k86N2N1j54J55N3N2q3q3j6j5J7J7k62K53J37j72L2L1J1J2j25j25J01
25H01J01J75l41J04J04J45J44k16k16J02J03n2n2rrj0rK0K0J9K0l6l6J39j72J77J77j71j71
23H51j86L31M0k69K40o9O6O6J16j94j9j9L2L2J74j35K51k65J80j29r7r7L8L8l6l7j84N37j78
20A078j79K80l0L5k75J6J5L15Ol36J80l10K04M70m59M0M1o3o2L36l86M26k96pqP0P0k92M30
18A309M3k66J13J12k16R3j86J23K77k38m1K68j96j96J04J04J55j53j98L19o9o8J48J49p1l80
16A039L53j63L14Nk68K46o2o2J10J10j9l29M58k64L35j81L3L2l2l3J82l34L4L3K58K57j87
14A865j87p4K35r3K16k35P4k16L00ooj47J61J40J39j70J39p5p6RL18n9l68J86J86O6O6O6O6
12B520j70j71K93j6j97L19k3k3k26M96j61J48j22j22L10k06L47j69Q9R0J3J3ooJ99j11J41
10C249J41l9m0n8K50O6O5L69l54n0M66mnr8K11L8L7J62J63j2j1J62j46L75O6m2K68J06J07
8E442j45L71K54n4P8P9K14K13K4K4N84j37L32L32k2K87j16J94N99j22K39K38L9L47P3L82N17
6A0266JK25K25L03L02K56P71k86M37L07L08L53L54L86L87M45M45N90K81O41O41J79O95Q30
4A9342L14P08L98O95O94Q50Q49J552J552J899K416K654L169L730M452M813N947O191P532Q331
2G8088J0084J0915J3287J5272J8263K2458K8954L6920M7128O5277P8579Q0294J00813Q5649
1F91981N9973N7820K9464O172r605j6540m5102o1373o8693p7665p6118o7386n8620m9005m0240
0B75063l2336k6665k2063j8454j5786j3415j2048j0707r535q194p665o738o151n841m701n011
-1F9753l709l710l388l387k388k698k060k060j760j760j399j400j156j155j079j079j103j103
-3C3359r67r68n95r05q85q86o46o46o46o47n46n46p21m11n00n01l40o49j48o63p15k00q2n99
-4A8947nl15m55j45n13n13J8k91k92k91j21m30k36k37j98J11k49n59j29j28j48j49k06k07
-6A3259k84k85L0L0k98k99j08M07n02J4n61m6n49L80k79L0j63j63n2n2m52O4J39l76J58l57
-8I685ooR7m19p7p7q9r0k87K3MMk02k02k8k8j74J35j36j36j30m39L85j30j11j10l4l3K31m91
-11G129qqj89j90J71J71j79j80k5k5j22j21L3L3o7o7J65n56J60j49J92l23K8K7J31l85J03
-13E749J03j03j03J39j70j70j70K17r3p3p4J30J30k50k50L29K1j99j99J74l41K77l2j74j73
-15D695k6K84k4l33L04k11n1n1J48j61N8k52J61J60n4n3k09L07ll12O8k42J16J16l29J87k24
-17D069Q4j08K00K88k28n4n4j63J46J65j44o3K46k24k25K85k5J4J4j11J97l82L39j71j72L06
-19D229mj4j3l3l3n2n2K06l10K72k43L04k11Q6Q7l13K03J37J36n0l59M28q8k10k10M41p5k17
-21D042R3J47J47r2r1m3m3M7N62k23Q6n6n7J64J63QQK7K7PQJ35j75L28J9Q3Q3J22J22J27j83
-23E592J65j44K18K17J98J98K74K73M48J38N62N63L62Q78M41R57J234R24J253J252K032J723
-25A9758K522L450L856N196O007O007O980O465O065O580N820L242L19j021k626l761n974n974
-26F2911o394n671n177m249l501k779k235j719q94j204k17R1L62L63J109J110J870K180K747
-28C8703L675M487O033P883R018J1035J1344J0687J0686J0449J0757J1138P323K179q10l855
-29A50732m988p721j0093j1105j1620j0815j0092q858p413o544n512m094m095l398k780k129
-30C9475k128j917j916j510j201r10j530m28j047k22n31Q3k27Q2Q3Q38Q38N68J186J340J339
-32C2265J636K254K799L417M268M887O846J0352J4502J5121K6951K3444M033N27N65n3k090
-33A51724o008r439j0883j1862j1244j0515r072p216o184m690l658k808j776j448q29J45M53
-34E4690J011J629K409L027M111N141O920Q364J1445J6188K8098K6241M2753N7396J5299l881
-35B80841k803l420n348n657q931j3262j7831k0100k0168j9549j7589j5321j3439j0759r494
-37I7170q464o984n952n198m580m068l760l379l070k424k114k327k018j922j304j601r82j316
-38C5707j008o40o40p37j18j44j44l16P15L54L54L86J417J321J939K518L445M367M676M819
-39E8271M508M355M044M019L091Q2j466k358k358k738l460l838m147m147l837l293k572k132
-41D2024j618j143o29l83J33L84O93J492K008K504L226M863N791P060Q814Q298O957O419O729
-42A03622O954O954M596m5k771m111m817m095m482n409o668p597p183o874o457n735m704l983
-44D7195l394l084k698k183k169j654j550j551j202j203q41q42r60r61p03p03o69o69k25p40
-45A9194m17m16j98n06k98k97l49l49l1n46j79j79j82j82j31m40m37P9l08Jl68n8k13R6m83
-47A2803j74L29K0m70j61p7p7m63j54J94J95o18L10k31k32N1k58q5q5P5P5n82L45l27j9k31
-49A0153k31J95j13O0k49J25j84j85j84R6R5m64K57j33j32n6n5l19J96J12j97k72K43O8m46
-51H380K7K7onm8m9q1q1K48k68j32j33M4M4r2r2k30P9P9k30J92J93l61n2M0L9o3o3k35K81
-53G452q6q6j12j12l5l5R6R5k33P6k2k2o1o0j31J78r2K18j91j90K54k61R5k14NNk5k6l15K00
-56F365N7N8K44k71j65J45J5k93J73j36n8n9J14J13l50L72k60M9l69J46J2J2K5L35l14l13
-58E647K54k62J52J53o7o7J83l32k23K93k73K43NMk46O4j11J99j30J80M4k65j8j8j8j7m7K62
-60E589l56J60j50j49M11j04P9k29Q5k23l9l9r7K12M2k68q7M28k71L7N1N1r8r7N7N7M0M1j33
-62E000j34Q6k24K99j1j56J53j95j94J85J86j63J47j9l29J55J54k71K45k19R0n2n2r1r1K82
-64D781o45M12J02MMj6K94m12j03L10k06j05K05k92K24m1m0J85j24k01J09P1P0l3l3m84O51
-66D687l49J67n2n3o5o5q4q5L02pr1r1N8N7P7P6k98J1j88N33k40O9p9p9R4k14K87k1q6q6j44
-68D041J66J23j86J48j60J39l76K04j06K38p1p1p1L5L6L5L5q5q6O9O9J1J2j44J66l69n9P6
-70C819L85n0m9l1l0NNk84K30J2J2j11j11J31J30j27j27J53J53j05j05J2J2J66j43J5k94l7
-73C636K73p7K32k51N9N5N5q0q0k5k5J30j80J11j99K46k70J29J29l16ok9K80k03J07P2P3j98
-75C648j98L79j37kjM6M6j48J62O9k41J08k03J80j29qpK67k49j33J77L7L7L21o07J43J44J17
-77C818l98K2K2J25J24K8k81J06J05n08M21N3N3j85j86r5M20j35J74j23j22K25K26m26R0N9
-79C612O0j86j86J56j54J95j15J6J7lkK1K1j91L25j20j19M61n4j5j4K30K31l55m6L8L9j11
-81C751j10j10K00k61M9r2K16l50J65K9L0k2l31M93k2n4n4p4K36n72n6K07j01J02J01j4j4
-83C342J37j72O0O1J2k98J54J53p6K32o18L10k8k9K04j06L4L3J50l67J13J12k48O0J6J6m2
-85C215m3O3O2p3p3J5L25l78J37r1K18j62j62j23J87J3J3k3k3k3k3j3j3K76k39l0k9K60k55
-87C008j62L54J67l49K6K5ppJ23J23j16j15JL10k64M6k50K65j79J31k02k02L72O3k68M2M09
-89C344l13P3P2j47J63q4q4L2L2j15J95j34j34J14J14j44j44Q8Q8j70L46l05K12k02J09m1
-91B965K70l11K05k53N7q4K24j09K01k25K90k23Q6j14j14J4L23m19j09M17j00K56m67J3J4
-93B807L74l47J1J1K95j5j06j07J06m09N46l82L1L0Q7Q7j13j12M50k71k98J2J09J09M4k65
-95B684J54J53m0m0L2k76N1N2ooL9L9Q1m35J13J13J53J52m66M61j8l28K33p6k0j9L9L9k8k7
-98B803J92n30M36p9k1k2J32l84M99j6l59L63j85j85L22j92J9K0j16j16J17j94K68m2m1m2
-100B647J1J0l37N91k39P0j23j23J69J69q9q9j30j31L98j18K15r5l0l0j5j6J39J39k10k10
-102B573J96J96m47K75qrK03l13N5N4K9K9J32l84K30k85N0N0J9K0k6k6K09n13J50J51L5L4
-104B679L5L5q1q0K49o1l7l6K1K1rj0j0rJ9J9N2N1k92K24L0L0k61M8M8M8j74J36n8n7K61m8
-106B783k8k9j07j08K54n6k33K83k7k7j27j27R8R9K10l06O1O1M0L9p0p0k23M98l20j0N13q28
-108B243L59M9O3k46K77k40J8J8J60j50K4K4K5K4j46J63k94J5J76l40M21J12k15R4j96J14
-110B552j14j13J83J83l07LL70l52K22q7O1k49J99J99j82j81N2N2k5k5o1o0J97J97q5q5K12
-112B756r8l24L97q6q6k05J04p0K39k47O3L0L0J76l41J05J04n1n2M71m58M6M5j3j3p6p6p6
-114B294K33j8K92k44k43K51n7j74L42q0q0m7m8M7M6K8K7J07k03k9k9P5P6J71j37r7r7ONK72
-117B689k44j08K01p1K37k19k20M26k96J36j74J65j44k80K36J63J63k30Q0Q1k28O1O2J78l37
-119B327Q2Q1NMJ78j31o8o8M1k68L59l63N6N6m2M73k94J5J77j33O1O0j72j72J31j79J49J48
-121B513%l09K43o6J1J1n0n0L17j98l9l9J16J15m01N27j05j05j32J77k42O7N19o15K93j6J6
-123B558J7j57J52q8K22l40k9P3P4J38j71o1o2K03j07J35j76m6K63j80J30k38K77j16j17N7
-125B411k52M26q9l99J17L77n51J64J64n8M58n22K00n8n8l86N41j41J67o4l74O40k88k04L11
-127B532p1p1J36j74O6O6k57N3j8j9KJJ75J75m43M84m25Q9L9L8kkk53N6R6R6N8N7j46J63l01
-129B200K15k2k2q7q6K04j04j50J59j40L76p6p6m2m3L5L4k9l0M7M8o5o5J28l88J75j34L10
-131B372Jj9j8j9j8n9K51p2p2K25q6j11j11J84j25K9K9J24j85J18J18k6k5j22j23J61j48J93
-133B466l22K96m26M06R7j4j3j61j61R6R7N1N1l01K13j01K07j47J62k24k25K33K34k05k05
-135B104J36J37K33p7j73j73L49M0l87J28j17L99j96J13k9k9j8j7j72J37j05K04k59N0LL13
-137B594n06K15k1k0n4K56k59N0j18L98l05NK62k54k08L07k08J01J41j69L34l88O1k48O8L78
-139B412J7J6j37j38J31j78K66m2k59N1J86j24L6L6j57J52M7M6q9q9m0m1m0M75l85J31k04
-141B079L11l62N67m40P6k04L10j40J69O1k49j71L45k04J05r4r5J05M15m9l59Q6Q6J64j46
-143B366j61j60K33p7J64j46RQO7O7K8k81k81M42J5J6%%j94J16J32j77M9M9k60K55j6j5j25
-145B123J84J84j25J1J0k67K49l22J93J10k00j8j8J82j27k68M53k42O7J24j86k76M46J20l95
-147B012R5R4o0o0L85j31j07j07m3m2M93m36Q7Q6q5q5L40l81j79J31L37j79J75j34QPl4l4
-149B153K55k60Q4Q5k39K78l0l1O7k43J41l73K58K58k21k21K44o6k32K84p8M39ql18k27Q3
-151B082J34j74J93J93j94J16k33k32L12LR9J00j47j47j86J24J66j44Q2Q2k73K44m7m7J13
-153B219J13j89j90M59k64j2j3k0k0J54J54l15nonj45J64O8O8j72j73L95j21k50N8K84k5M2
-155B253M3M2k67N9N8L9L9J1J0l96L26K7K8k18K98j53j53K40o9l22J94ooL77l44K80m41L35
-158B284j81Q4Q3j45J64j65j65J27J27k8k8L0L1L0L0j23j22P1k39n5K54K93m29K46o3O5O6
-160B242j15j15j47L68n4n5k2k2M2M3M2M2j17j17K11r8R6R5R6k14j1j2l0l1k1k1J53j56k9
-162B043k9m8m9J81J80k51N8N8N8l48L74J00k09ll12N37K1j73j72J21J21k78L1k02L13j31
-164A991J78j15j15N9N9O6O5O6k44J17j92J68j41j49L67q4K24m74M1R9J00K66k49j01K08k46
-166A964K70k1k0P7k32L67l54j35J74K45k71N4N5k88K29M4k64K70l9kkk1k1m1m0J01k08L24
-168B215j91K15l01R2R2Q0P9k94J6M1M1k58M63k20k20M65J56k57k57K49o0m1m1N4N5j20J90
-170B243k3k3lmp8p8r7K12J2J2K83m39j4j5O9k40L76l47K34p6m9K59k23K92j14j14J12j98
-172A969o2K48J13J13o42K87K3K2q4q4P1P1N8N8p8p7m6K63o6o5K2K1M1M1k88K2L11k04r1K18
-174B185J2J2n3n2q5q5K63k53L28j88rrm2m1o4o4J23J23k10L06mlN9k50r5K14k6k6K64m6l24
-177A960j5R5R5n08K14K59n0q5K23N0N0j82J27l18M04m4l53L11k05J27J27k34P5o8o8K34p4
-179B147l61J54J48J49m10L13j26j26L12k03l6l6N15k06k13L02l78J38L25o04K17K17j83j83
-181A872nL04k4k4j07j06K22q8rrk61K55J82j27n6n7l3K76k59N1K08l07J57j52K67m1j45j45
-183A839O0O0j47J63K51k65l3l3J34J35m0l9Q4k24K00j09o2o2L96j20l05K11M3k67J81j30
-185A921J03J03q3q2P2P2m3m2J32J32l78o8L06k09R9J00q7K22j92J18l47J69R6k12j04K06
-187B004M2M2K10n13Q3Q2J8J8J87j21j02K07j65J44RRj74J35q4q3j12M05O3k47j98L18M1m75
-189A743J80J81p7p7j43L72l04K11j29m38M26J16k28Q2J46J46j32j31k66K49K6K6p7p8j4K95
-191B105O9k39k13L02q4q4R7R6p8p7J66j43R5k15K95k20J46J47j91J19O6O7L7m80L78j37j91
-193A833J19O7O8o4o3M01l21M6k64L55j61k56M66k29K85l76J40K4k86L72j43m8m7L14Nk54
-195A983N6j27j28L43L3j68J41n2n2J05J06o42K86r1M24k39P0m1m1r9r9N9O0P8P9p3K37r3
-197B115r2q2q2J69j40N8N8k90K0J57J57KKO7k43Q6Q7j25j24J34J33p9p9P6P6N4N4k74L5J38
-199B068J38m49O8j87N35j16j15J05k05J70J69m25K96k38P0K76k40Q8k21J11J11k06J05k10
-201A698L05k3k3q5K23k33P5k14N07j18j17j70J39M2M3k15k15L19J1K3K3j90L26j98J11l0
-203B014l0o8o8J06k04R3R4k17L00L9L9k19K97r8r8J86j24j70j71K04K03l28J87P1P2k03J07
-205B014l97L26P3P3l7l7L2L1J48l68J44j65J51j58J78J78j89J21P5k35m0m1J06J07j51j52
-207A787L3L2L3L2j6j6J58j51J49J48l03PJ03J04k84M39j60j59k11R9Q3Q3J22j88j5j5k08
-209A686J01J90J91j51j51R1R1q3K26o1o1p3p4K47k69R9R9j39j38J70j38J88j21K08j01j23
-211A904j23J48J48l06K09j45J64k53K63P0P0O2O1m21L00j29j29J88l29K63m7R6R5j96j97
-213A766K9L0K61k55K10j00O3O2o6o6l21M01noj9k0%%r4K15M2M2j99j99M0M0K07j02J4J4j94
-216A790J15j56J54K0K0j92L22L4k75p0M46m48O8O8O7o0o0R4R5o8o8Q6Q7n5n4J39l76L25J5
-218B063o9o9k69K46j1j2k53K63o7K43Q4k27j35L79l36J80P7P7j51j50k8k8K86k29K73k42
-220A895pol9l9J43J44j2j1r8r7N7N7j2j2J55l60L56l66M40J31j91j92l7l7j91J18L95l27
-222A857K45k71J49j61L3L3J87j21n1n1J30J29k85M37n3l62P0O9L8k72K70k45J60J61N0k60
-224A886J46j63K8k80K35K34j37j37J39J40j91J18j08K02K21k95j40j39J80J80j09j10K62
-226B162k53k14R5Q3Q3j4K95n85L42p7K33j85j84J63j46M1M1j71J37J85j24O9O9n0n1o9p0
-228A805O5k44J87J88j71j70J91J90k6k5k78M45j84j84L06k09M4M4j62J48q0q0K68m1o5o5
-230A897K5K5j63L53j25j25K09l06J38J38q4q5k00L15j79J31j2j1J4J4j40j41N0N0N0M9n9
-232A828o0L85j31KLk04J05J5J5J90l27o2K47k18K99k17K98j85j85k06L10%JQ4k25Q4Q4J31
-234B061j79nnl4l4J21j88K42o7o7K43j70J39j57J52k87K29o2o1K9k81L00L00o09J13L58j57
-236A924m0l9K95k20k9k8Q1k29L52j64P5P5J95l20K40m81M32m96L29K0n0K60l78J37k2k2m2
-238A855K68m09L13k28Q1j64J45N5k54L67j50n2n2K63m6k07L09m13J04p1K39j5j4ql17L76
-240A975j40k4k4q5q6J28J27L15m07J41j69L76j39j98J12J06J07l06LN2N2j03j03K20q9q9
-242A752K20m0m1o0K49ol16K06j03R0R0j03j03K13r6j09j09L88j28p7p7o7K42k09k09L32K3
-244A952q0q0J10j99K72l8K39k76J4J4j43J66J1J2j74J35q4q3j08M09m24K99j72J38N3N4l10
-246A707M12l93J22J85l30j12M04k34K80j76j77M48k73J33J32r1r1o0n9k65K50K18k97L06
-248B039k09Q0Q1l43J72J41J40j26j25J26j84J0RO8O8n2n2K38k78kkn4K56r9r9n4K56l05M17
-250B117O9k41q8K21j07j07j41J68K7K6k40K75n3K56o59K69J08J07J45j65o7o8N6N6k2k1P1
-252A992P0j80J28o9p0o9K39j54j54M64m63J16J17j9j9r4r4L18j97J27l89K81k8J06k03J58
-254A914j51k51K64m5m5P8P8R7R7k12R7R8k13Q1Q1R3R4l06K10l52J65j53J56j59J50l4l3n4
-256A745K57R5k14n2n3K66k49nmL68l53L43j73n0n1J76l41L00k15J0J0K58k57L2L3O4O4k64
-258A740M4J05J04n0n1J39j71n5n5m4K66q2K27k27k26K37k78P3P4K1L31k09k08lL07q0q0O9
-261A918k41L43l79J62j46K35p4r4K16oom4m5j71J37J19J18r4r5Q0k30J48J47j30j30J6J6
-263A770J71J71j42j42J16J16j9j8m25K97PPN3N2j26j26RJ0J25j84m16L06J75J75l8l8K7K7
-265A940M6M6m7K62l63n3J10j98J69j41j2j2R8k12M64k59J28J28j42j43K24k91J17J16r0q9
-267A796J35j75J55J54j87j87J54J54Ql01m4K65opm6m5j95J15Q2k27L93j22pop9p9p9M37m34
-269A622Q3J33j75L28J8j36J73k38P2K85k32kll5l5N2N2P1k38N8N8k13R7J1J1K05j05j32j32
-271A653L26j90r6M19k00J10l33J83O6O7j81j82J80J79k9k9k8k9m8m8K41k73M0M0K7k82J82
-273A765J82j2j1P2k38J30j79k66M3M81l4K8k80K87k29J61j49k5k6K53n7l7l7L0L1L0L1r2
-275A852r1M11n17K53n6q2K28k47K69j38j37m4K66J37n86J83J83j8j7o5o6J92l23L80j35J74
-277B006l42OL16m13N16k43k43J76J76qqk01J08J55j54K0K0J26j84L52l70K54m67L45L5j83
-279A795J25k61M9J02k07R0L99k13R6n9n8Q8Q8k22Q8k31P9K07j02K79m42R9R9j58j59K73l6
-281A808M9M9J64l50O1O2llL04k12l29L94r0r0m05P29k15R5j62j63J66J66O3k47N5k55J39
-283A780J38J77j32l65L58r9j00l5l4j6K94J07k03J37l79K52n7k37K78j2j2j43J67qpr5r4
-286A660K66m3k55K60m9m9J15J16J79l36j66L49j27j28J4J4L4L3j99J09K26k90K22K23k61
-287A917M8J00k09j6j6O4O5j10j09J87j22P1k37K19K20j29j28r5M21m62N3M20l01j01j01j1
-289A638K99l00K15j78J32l0l0K54n5j91L25pl17K18r0k7k7J73j37m33K89J54l62K63K62l04
-291A734NK4K4K5K4J89j20j00j01J09J09J28j81o8o7O8O7j09j10J49J48q4q4j03j03K64m5
-293A792m6m5J90j19p4K35k68M54j90j90O1O2O2O2p1p0m5K65n16K06P7P7o8o8k03L12K3K3
-296A928m21N07m46K77j04j04K96k20J28J28J0k99qL00k75K41l0k9j11j10Q9R0L48n80r1M26
-298A940o1o2o1o1L55j61j81J29l5K74k09J00j83j84K3L32m3m4R9R8n51J70L31j85j04K06
-300A932jjJ1J2l24J92k18K98J5k95M55k66K4K4jl10K26K25k13k13L36j81N3N3k30P9J57J58
-302A997l90J25L30K0j34j34j11j11L40L0k82K8R2R1m2m2k3k3N2L60l48l9j24j23M56k65p2
-304A658p2M31q5p9p9M4M3k7k7k8k7M6M6J4J4J84l31J33j76n9n9L53M5j40j40J70j39J34J34
-306A981J28l88J27j83J32j76L3L4K66m4j90j91L45L5j76J32l12M10q1q2K92m29Q4Q5k70K45
-308A807R6k14ppK75K76j70j69j53J56k11R8J90j19N5N5K9k80k74K42L24j92L82l40L4L4k05
-310A712J05R9k10J38j72K38p2j87L27l21j2M39k83k62K54mmj28j27L04nl1l1K7K7R5R5j63
-312A848j63R7R7J2k96J86J85r1r2r8r8K31p9Q9Q8k40O9KL11k89K27q0q0K23k93J13j96J01
-314A784J00j5j5j5j6o3o4M39m88K47o2j20J90k4k3mmL0K9O2O2k12L03l73o4M69m58k08L09
-317A796p2p2R5R6J27j82J1J1n1K59j72j73K08K08m23R2k01J08M04l17j27L88j01j01j1j1
-318A789J63j47n8n8P7P7j5j4j12J98l7l8J4J4k67K49j05K04k12L03j22j22l1l2M5M6M7M7
-321A903j08j08O1O2j7j6MMJ84l31L74j41j74L42j83j83L77j38K00j09k05k06o8K42q7q7n
-323A587mK46o2J7J7j56j57J56J56K7k82L93l30j35L79j45J64k30Q0j3j3N08m19J01k08K36
-325A913p3M9M9j64J45l8l47K77l2R6R6p8p8LKLKj45j45J32J32j29J81J03k07J9J8p8p8Q6
-327A714Q6j40j39O37m96jL09m19R6J3L22n2n2l3l3J8J7K11l05P4k34J45J45Q6k23o9o9J89
-329A797j21L5L4K08j01j20J88P4k36J31j78k9l0L38l85J98j12L6L7j30J80l04K12K09j00
-331A831j78J32L23j92J4k96P8k32K00K01j31J79k13R5j81L34k59K57K04l12J1J0m9m9o8K40
-333A949n5n6N4m61M92k30o2K47J92l23l3l4J39j70K2K3j46J63j2j1l0l1K40o9j96J13j97
-335A518L19k61M8Q0Q0p4K34r3r4P5P5m8m7k12L04j41j41J19J19k3K86m72M3J85j25K06j04
-337A856qpk04J06QRK2K2J77j33K1k89J43J43k09J01O2O2J11j99m4m5J96j13p5p5j5K94k28
-339A689Q2J24j84J05k04N7N7l9m0J06J06m8m9L4L4JKK09l07J38j71K03j07j26J84j9j9J55
-341A973j54J44j66Q6k24m3m3M1L50k02J07k22Q7K7K6j28j29K92j7P9Q0j04j05P0k39N0N1
-344A687N0N1j76J33N6N6k77L2J15J16j11j11L01k14K27k88J76j34j02M14l21J95j02K08q9
-345A892q9m1m1J78j31k09N13j50j51j62J47m6m6J70j40L4L5J4J5J5J4R9R8m62K60O6O6k17
-348A731R2k9k9k02J06K42o8R4R4m98K24P6P6p4p4J84l32L81j35j68j67K10l05N65j57j78
-350A659J32QRq8K22j40j40J68l47N22j99j25J84J40j70m0m0k6k7L55l66L10m12O0L70q2l90
-352A547M66k54J31j77J41j68J9J9j59L56k62M7lkJ32j77r9K10M9M9j95L22k66M5j60L56q9
-354A878q9J47j63J1k99K42o7O8O8P2k38K84k6o0K49j70j70k88K28R3R2l7l7j14j14J93J93
-356A946k19R0j38J71J6J6j50j50o6K43POn1n2k0k1k1K88j89J20j5j5j80J30J30j80M3M2k86
-358A495K29J15j94K69k46K80k35K35k81k8k7J14J14j67J42R7k13K76m46J28J28j96L20l17
-360A592M04l3l42L28J9j82J27r8r9K18k98J1J1j7K93k30Q0K50n9n2n3Q3m33J15J15NOj4K95
-362B042k75k75q2M34p5p5M1L50k59k59J92j17J54J53j23j24Q4Q3r0r1J88j21p0o9M68k53
-364A831k73K43k16R3J58n64M83k39L73l48Q0Q0LLK51k65r7r7o0M56k73M49l41L81l54m5L20
-366B032m02K3K3l5l4L33j83m7m8K49o0L3L4l86J30L21j93L1L2J09k00R7R6l82L40j24j25
-368A664m5K64q4q4J79j31j11j12J76J76K1K2p9p9P6P6o1o2o2o2L9L8OOK16l00J45j64K09
-370A877r9P4k35J18J19q8q8K53k64K78m43J73J73j55J54K01l15L43n86L50M1o8o9k23K92
-372A813j7j7J57j53j71J38Nl03L79j36M40m88JKJ14J15l50J66N4k54J90J89K08j02k56M65
-374B189k14k15Q9Q8k3k3j19j19J30j78L95j21l62J53Q9Q8p0p0j09K00J68j41j03j02O1O1
-376A742Q0k29R0R0J23j87j72L44l53L70j41J68k57N2k15L01j62L52k06J03l9l9j39j39J00
-378A637J00j8l27N29j91j18J91j44J66P9k31j79J30K85m37J88J89m42K80J25j84K8K7K78
-380A961l1l21j1K20k95L28J9j17j17K03j07K41o9j11j11K5K4N3N4j21j20K03j06K04l12J33
-382A719J33n5n4p6p5M6M7L18j99k36P2K03K03k61k61J76j34J63J62m49K72J56J56k93K22
-384A955o7o8J1J1M3M4l14K01Q5k24l2l3q4M32j88j87J03J03J2J3J87j23j78j77K48k68J52
-386A657J53l4l5L0L1O8k40m1K69q0p9J77J76j84j84P2P2noq7q8L13KN8m58L47L8j32j33L
-388A680LO9O9O9O9j21j22j21J88k90J9L09k06J17J17j21J88l26L95j13j14l63J52n4K55m7
-390A701m7J46j64J82J82k70M0j9j8j54L61R3k17j65J44q5K25k98K18J08J09l88J27j70J38
-392A779P5P4q7q7O8O8p4p5K74k42J0l00K22K22k25Q4j41J68l75L47q5q5L51l70K09j00M6
-394A751M5K6K6q8q7mL06j48j49K5K6M5M6j09j09QRO7O6J23j85j86J23J28J28J61l55O6k43
-396A512J56J57j10j09J23j87L45L5J19l96J08J08rl17R6R6K11l03J73J73l23j4K91k25j28
-398A582j29N23m05J16J17K0K0L10k06j04j04R6k14K65m5m50K71K8K8L25l98l4l5L46j69J59
-400A913j51J65j44k5k5p7p7K95k21J93J92m10L13l64L57q5l95N91j30r9r9J65j44K4k86J26
-402A602J27L7L7N6k53P5P6q0p9M3L53k53N6n2n1j49L67k42O8M8M8k79M43L7m79L00k16L31
-404A971j83j7j6R3k16J68l48L68j48n5n5K23q7K49o0j06j05K33m89J75J75j9k0L9L9m90M39
-406A758P0P1o1o2k9k9k47K69N6N6%jk00k00M98k25R8k11j7j6L12Kk35P3L5L5O7O6l78J38
-409A693J18J19j53j52M43k79k8k7k6k6poj27J83J89l26J68l48L55j60Q8Q7P5k35O5O5K20
-411A968r0n0m9j86L31k98J1j56N66l84p4K2K2K03l13L84l39R0R1j29J81j3j3POM4M3l81L40
-413A834J85j24k34P6mnl33N95j78J31j79J31P9k31nnk05L11j54J56l5l5j6j5O8O8j06K04
-415A974o7o7p9q0K65k50L9M0j16j16J41J42M4M5O4k45ppj69J41k04L12J89n32J59J59k1k2
-417A732j15J95M0L9k72L7J91j18J14J14k8k7k88K28k36P4L8L8N7N7l5l4l5l5q3q3M07n22
-419A450M26r0j67J42m5K64j48j48qrqqL9M0M0M0J1J1J1J1K3K4m21R5J30J29j15j15K42o7
-422A779o6o7J36j73j9j8K49o1j44j44K08K09j08j07j65N56l97J18J52J52m60K62k06J04l15
-424A475K00O1O1K29k87O1O1r4r3k15L01J52j57K14l02o3o4K49k67K81k34L10k06N3N2p2p1
-426A635q4M31k52N8q5q4p0p0J87J88j38j38J72j38K43o5k40P0P9P9n6n6L2L2L3L2j6j6j6
-428A747j6k5k4onj66J43J24J23r7r8L8L8J50j59k55K60o4K45j55j54J9K0L9L9k08J01M9M9
-430A752K09l06J06J05l13M08j71J37j05j06k22K94m6m5l04K12j5j5L39j76j95L20r8r8K03
-432A870j06O8k42J95j15m4l54K90K89j62J48K4K4k53N6L61l61L16m07J66J65k53N6l38N91
-434A984o7o6j76j76K56n3kkm0K69r4r4J25J25m79K42k21k21N52l76M9M9K67m2k4k3r6r7N8
-436A627N8L0K9Q1k29L15m07N7N7J42J42l02K13K2K1k95K21k43O7J76j34K6K5k45M77m7m6
-438A838J33l82Q9R0K30p8q3q4n7n8L10k07p1p1K18K19m00J16j74L41OOj66j67L62j53N3k57
-440A603J43J43p9p9J14j96j89J21J00J01o5K45k78K38k56N4K02l13J32J33n4n4o8o8L5L44
-442B009l59n0j92N29L07m14k15R4p8p8K70m0j12j12J27J26L0K9j24j25J39J40j89J20j05
-444A727j05k15N07j45J65k94J7LLK3K3j4j4n9n9M00l22J62j48K55n5n5n4K7K8j27J82j88
-446A668J22k07J02J09J09j81J28k97J2K90k0j27j26K02j07j62J48o5o5J66j42J2J2K92j8
-448A855j73J37L9L8m25K96K77K76n42k33J63j46J64j46j01K08J5J6j3j2J43j67Q7k22q0M35
-450A889k29Q1o1o1J43J43j15j15n1n0M13j02j93J16r1r0J48J48j10j09L8L7j36J74j7j7K
-452A785Lnmk3k3J31j78K02j07k70K45o4o4O2O1K81k9n98J24N9N9P9P8p6p6L4L4J88j20R1
-455A879k17m3m4k5K84k19R1J81J80l28J87k00J09k91K25j45L70m49K74n8n7J3L23m37K84
-456A887l73J42j33J77L4L5RRj65J44o1o0J33j77L3L3J88j21N7N7j16j17P7P7P6P7j09j08
-459A705k5K85o4o3k18R1O8O8J07k03q7q7K23q7J6J6K9K9l29J87K26q4l9l8O5O5J32l83K35
-461A840p3l6l6n4n5Q0Q1Q0Q1j14j14M1M1M1M1j14j13qqJ66j43J2J2qqQ6Q5k43O7M7M7q8q9
-463A544J34J33k40M82l50J66P6k34P6k34M82k41J5J4J24l92n6K54Q5k23p9K31L7k72K41o8
-465A705K60m9j30j29J28J28k18R0j22J88%l09l1K77j07j08K21q8J67j43J66j43j5l24K62
-467A676m7JKJ36J37r1r1j42J67L60j55j23j23Q6k23Q7Q6J28j81ppL6L6j39j38K48o1m1m2
-469A575R2R2R2R2j93j93K38p0l4l4K4K4OOK6K5k66M3M50k73j42J68K5K6p7p7N9N9P5k35L65
-472A968j51P0k39J53j55L3L3%l08L44j72J18J18j29J79k72k71L35K6M4M5p7p7K70l9k91J9
-474A574J86J86j23j23L1L2J2J2j24j23J38M47n13k04L92l29K12r8M36m92J65J65j30j30K05
-476A804l11L26j89M8M9J24j85L11k05k53K62J15j95O7O8K9L38k27k28J40j69o7K43k02J07
-478A800q1q2q1K28KLj53J57o9o9K41k75onR7R8J07k02o7K43R9k09Ll07J63J62j86J24M0L9
-480A814J%k60M9J46j64L94n33K20q9klQ9Q8k49K68k75M48j69j70K37p3k23K93l84N44k75
-482A722k74N50j71j01j01J31J31k52N6L8L8k7k6J79j29k30K86j97j97L29K0j09j08M32k89
-484A701j16J94j23J86m6m6pqk6K82j93j93K72k45J08J09k91K24m9m9K73k43RRj52J57K12
-486A949l03j09M06k99J2N6N6k79K35l4l5j19J91klK94j5m09J07J04k05K45k70j22L94k12
-488A633R8J24l90J57J57J17j92O0N9j42j41L09%k32P7j36J74%%k90K25R9k12J50j59J69j41
-490A573J69J70j63j62J79J79N3k55q2q2J0J0J85J84k44O5r0r0r1K18K5K5J02k07J86n36M83
-492A814l3o4o5J29j81J48j61J81j29j48J61J32J33j06j06K5K6j67J41K40o9l01K14j87J22
-494A749r7r7Q1Q2p3p3N1N0N0N1p1p0j09K00J78j32j90J20J02J02j69j69K29k87K62K61k24
-496A807k24J44l72L04L05q8q9K0J9N2N2k42K73j90j90J57j51J77j33K73l7j1l21M44k79m6
-498A654m7M7M8L4k74L98j17j17L99l35k5l2l2K47o3J25l92J92j17J02k08K63m6o6K44n3n3
-500A776O3O3k80L0j0rJ56j54K1K0R1R2k18K97Jl09j03K06j56J54r8r8L15Or7r7J40j70K36
-502A868p3N7k53J73j36k1K89l95N34l93J24j55j54M41k81k62M60j72J37q8q8K7k83J68J68
-504A692m6K62j37j37r5M20m4m3J04k05l0l1m2m2J51j58M06n22K58K58l27j7J69J69k97k98
-506A418J67J66pqpqm5m5L60l61J06J06j32J77j14m24N37j85o8o7K35k80L09%j3j3j29j30
-508A545L03pk9l0J45l72J64j45K92j6m53K70K89k26j09j09K90j9n7n8P7P8l2l2l2l2M9M9
-510A793O8O8k04J05j84J24J0l00J51J51qrL7L7l97L25k55N5L0L0J46j63Q1Q1j26j25L18j98
-513A641l0l1n6M60m11J05K73k43R8R9k65M5J60l55J29J28j74L41k04J06j91J19j23J86j42
-514A665j42K16r3J00J00j74J36l8l48L87P9j28j28J2J2l3l3L14m08M3M3L47j70O9k40j40
-516A448L76j1j1M2M2k93K23K95m27j30J79k40K76L8L7l22J94L09m12k7k7r1K18K8K8k23Q6
-519A605O2k47J00J01J02J02j95J15j56L60m52K69m7K63j05j05j67J41q3K25l70L52l5l5R
-520A809Rk82K35m4m4j1j2J0RJ06k03K14K15j47j46r5K14l27J89K9L0r3r3R6R5j94L21k7k6
-523A837L8m78K44K45m6m6n8n8K90m31M78m49K46o2P7m39J93J94l0k9O8k42J37J38j59j59
-525A499K26q3K6L36l41J74l29J87J37j72J30j79m4m4q3K26j59j58K60k55N19k03J70J71j17
-527A894j18J34j76J60J59l75o6j16J93N8N8k06J03K19k96J0RJ52j58j06j05J52J52q4K25
-528A872m6m6J28j81l29J87L36j79j48L69j68j68K89m32j3K96o5K44l16J99k45O4K2K2P4P4
-530A840k61K55k2n38M48J39r9j00J63j46j7j7L13m09P5P4q5q5L59j56q4q4K32p7k0K88n62
-533A424L66j75J34J8J8k3k2k3k3L4L4J82n40J07J07J39j70K00j09j02j02M52o82K15K14O9
-534A742O9l17J98P8k31L81l41Q0Q0j20j20R1R1J95l22K98k19K33p6j22J88j80J30q3q3P2
-536A712P1J12j98J31J31j85j85J89j20j67N54k31k32N0N1N0N0q0q0K68k48J09k01R5R6J00
-538A842J00ll12J18j91J63J63l35L87r7r7KKJKk1k0J53j55L7L8j37J73k13R5J99l17K15l01
-541A491K40o8L10m12k5k5K33K33j48j47J18j91k10R9K27q3j2j2M38k84j35j36J76J75l72
-543A480J43L3L4j28J82J01k09j5j5J6J7J6J6M4M3k27Q2K25q5Nl04K73l6M0M1j01j02L05m18
-545A456O8O7K94k23J14j95J20j89J13J12q1q1K39o9j47J62q4q5J68j43K00j10k06J03R4R3
-547A790k55K61J2J1n3n3M1k67K67m54N02k20L02k13N7N7q4q5K42k74J90j19P3P2J82l33K11
-549A860l05J1L20j15j14J24j86L18j98k4k3k45K71j9j8R6R5j55j55J37j71K92k23J27J26
-551A826J01m15J36J36r6r6J24j85l1l1K65m5k0j9K08j00q8q8j09K01k44K71k21Q9K82k8l41
-553A482J74p8p7K35p5K09l07R4R5j12J98m6m5j03K06j94J16k0j9j24J86N7k52J46J46j96
-555A696J13k44K72j28j27J02J03k6k7KLKKrj0K49m73j83L32P5P4q0q0M9M9k8k8K43o7j70
-557A686J40k47K68k81K9J70j39K14r6j34L81k83K6r7r6j76J34L28j89k3k4J76j33J12j97
-559A549L63l59J01J00k54K62O8k41M2M3m2m2N4N5j47J63m4m4L26j90o2o1K92k24j15j14J67
-561A646J67K25k90p8p7l3l3P5P4J52l64J72l43L53M4k17K99k56K60k67M55n76L52K10p17
-563A233N45L0m58M70j81J28p0p1q4q3K74k42K23q7M1M1J83l33Q9Q9k33K83j28j27M39k82
-565A689j22j23K19K19n4n4j70J40O0k49R9k10L34K3j56j57kkK50o0m4m5R1R1O8O9l57J58
-567A705j82J27j11J98j4j5J01k08J58J58m03L19k10J00j65L51p9p9L0L1j3j4K0J9j30L85
-569B079o97M37pqj30J80N9k50K7L36k16k16M2M1J28j82q5q4K08K08l52L69k00k01M43m84
-571A445K42K42k80L0L71j45K42m80j50L66m14J02L4L4j1K98k80K9K9L0k4k4J50j59Q9Q9J02
-573A957m14J27J27o0o0J1J1k1k2K51k66K5K5O4O3k58K57K17k98j50J59r7r6J99K00l02Pp0
-575A586p1O4L72l55m6L14Mj43j44n5K55j91J19Q7k22L96l25q5K24k86K31n8n8K64k51o8o7
-577A491K48o1j01K10j58J51l2l3j3j3k7k6K63k53l0l0J32j79L8L47kjj86j87N2N2J37j73
-579A616R8k12J45J45l0k9j45j44M03j12m8m8k15L00L3L4j92j92K80K80k74L5O9k40kjK67
-581A821k48K2K3K08j01R2R2k67M2J97j12q1q1K48k67J82j28L4L4j31J78k8k7L57j59j45j46
-584A609J61j50p2p1L80P2l22j2K72k43K8L37k7l37J53j56K50k65J98j11j72J37J18j92N4
-585A639N4j72J38L21j95j94J15j35J75J94j15l2l1n1n1P7P6j10j10K67k49j13J96j50J58
-587A702NMm8m7K43k73R0R1j15J94j25j26K04j06O8k42O8k42M35J25k74L6J48j61k58K57N2
-589A705N1n1n2j16J94J%J10j99k5k5J03J04n1n1K0J9k50K64j52J57j20j20K2L31k88K28p8
-592A731p9J29j82M1M1j33J77j48J62j2j3R5k16L07k09l28O00k57k57K97m25K39K40kkJ8J8
-594A832j47J63l01K14j0j1j21J89l33J83R8R9l55J60M4M5r8K12j17j17Q1Q1k48O2N2N2k64
-596A445K51L65l57n5n4j32J78J97j13q2K28o9l78K75l3J40j68k7k7m6K64j23J86j24j23j17
-598A501j16L28j87J32J31k29Q0M0L9j47J62J49l67L88j28l5l5q7q6K93j5j51J58j69J41m7
-600A743m6J92l23N0L60r8r8m7m6k14L02J1J2j16j16J61J61j74J36l29J87PPN9k50n4n4K16
-602A639K17m01J15J15J15k71K44o6o5Q3k25K38k78J19J19J07J06k51N8N8N8k99J0J0J0j27
-604A438J82QL18k75L4N3k56J7J6J90j19k2K87j96j96L64j52K29k87L25l97K48k67J82j28
-606A596L05k11M0M0K7K8k13R7p7p7J10J10j29j28M3L53p9p9nnnnJ4J5j60j59K10r8J92l24
-608A426K93j5m8m8J97j13L13m09rrj90L26J9K0j22J87k04k04L31K2J51j59q1q2opL9L8K34
-610A890k82K40o9n2l60M77k45j52J56k17K98K35p4j27j26J9J9j%P5k34R5R5L2L2o5o5J34
-612A728j76J7J8oL05m31K91m0m0J02J01l33k4K53n6j22J88q3q3L5L5m3m3K4K4J20j89J53
-614A725J53m15J01O9O9K17k98K07j02j34J75j25j25kL06j51J59k02J07P7m37N16k06P8k31
-616A531M9K03Rl00K96j4K5k84K09j01N0K04L4k76q4K25l03K12j53L62j37J8j10j09J38J39
-618A833P4k34R4R4r3r2N2N2j4j69K56n3j08M7k40K76k29K86k23Q7j42j42J35J35o5o5J08
-620A660J09j62J48m91O44j53J57l72J44j57J52K42k74j50J58L6L46k25k25N2N2j1j2P6k34
-622A510J51lJ32k3O7k42P7P6%jk0k0M3k67J29k5K23q7j15J94P7k32n8K51opj51j52J34k1
-625A634j08K01k1k1jkj0rJ45J45o9o9K7k81Q9R0K06l09n4n3J91J92k97J2J3J2k42O7J70J71
-627A819j70J41J40j70M2M2j13j13j54J56L16j99K04l12K16k99K08j03J37J36l52m2L51j65
-629A716j05K04j4l24L65j50J40j69n2n2J86J87k06k05J56J56j07j06K02l12M18n09M25r0
-631A754J3J2k51N8o3K46j66j66P6P6K11l04N6N7Q2Q3R2k16J6J5K77l3j17j16KLKLk0k0J35
-633A797J35j63j62O3O3J69l46R8R9j5j6l37J78K55k60L33j83P1k38N8N9J21J21l81L40o4
-635A795l74M12j03j01K10l32J83k42K74k42K74k60K56kkk1k0j95J14J0RJ0J0N8k51J75j35
-637A510K34K34j47j46P6P5j11j12K76k40j63L52j05j05j70J39J34J33k09k08J74J73o4o5
-639A665k13R7J80J80j18j19N5N6j46J63j1l20K74l5k81K36J91l23J91j17j31J78J40j70K14
-641A836r5j2j2M13p22J73J74m2m2m2m2J8J9J73j37J97j12j31J78o1o1r3K17l61L62K26m96
-643A525O8O7J00R9m5m5p22O18O8O9K16k99l59J57R2R3k1k0K70k46M0M1j97J11K32k84ppJ93
-645A807l23J41j68P5P6N6N5q4q4K25q4J57j52j78L37l60J56N2N3J24J25m04J12j06K03r2
-647A719r3l5l5M2M2RQj1j0J91j19L7L6o1l69J33J33K67k49j45j45M52o3l1l1MLJ20j90j67
-649A442J42N9N8j89L26j38J71j72j72L82P3k25k26K70k45K27k89L43l79L88j28j35J75N1
-651A809N1q5q4p6p6k05N17l47l7L81j34q6q6L7L6J45J44l20j0K18k97Q9k20K71l8L9L49k48
-653A737O1j6j7j3j3K77k38r7r7j29L87l64J51j26J84J36J36k05k06k1k2p3K36L02k14r7K12
-655A871J0k99J72J72k20Q9j81J28p6p6R7R8RJ0M1M2l60J56M0M0k35P4L00k16j76L40l69L52
-657A833j81J28j4l23L83j33L4k75L03ok00J09O9k40L1L0J42J42L3L2l99L23k58N2nmR2R1
-660A789j38j39J7J6O8O9O8k40K81k8o1o0K88k27p3p2j02K08j40J69P2P2k17R1j59J50nnn1
-662A641n0J36J37k60K56m40K81n9n9J79j30qL02k20Q9j45j45J32J32q1q0j00K09p0p1p1K38
-664A743r0r0r0K19M7M7q8q9n4n4J97j13M7M8k63K54L2L3p1p0PL17k5l34l5K75p4p3o3o3L43
-666A870l78P6P5J8k92L72j43k21Q8K94j4N6N6m02J14K68k47N2N3j73J36K27q1k17R2j23j24
-668A432K95k20M78k45ooj41J68ol15K98j0j14j14K1K1K2K1K7K7k43K72q6K23k08L08q4q4
-670A731p1K39j39j38K09r9o9o9O6O7n9n9J14J15k01J09m6m7k34P4P5P5j79J30j59J50J58
-672A743j51K35p4l17qL02pK31k85r1r2L5L5R2R3J22j88k07J03J67j43N1N0n2n3J22j88Q4
-675A609Q4Q3Q4j37J73r9K11j61j62J16J15l43l44K43K43j11J98l81L40n4n5m1m2L71j45j06
-677A689K03j03j03k12N09j88J21o5o6k04J06j21J89J48l67L93l29K23k92J08J08p7p7P8P8
-678A749m5m4j80L36l8l8j61j60L16L17l02Pn9K51l35k7Q7Q6m9m8N9O0O0O0j58j57mljkK11
-681A788l05J06J06J90j19j11J99n23O11k73K42j31j31j4j3O4O3r8r9K49k66J32j76K17r3
-683A615P3P3K67k49n1n1J11j99j1K99m9m9j20j20mL05l59J57L19Rk88k88J57J58o6o5q5K25
-685A714o5o5K63k52q3K26K1K0l5l4K4K4k5l34K72l7K0K0P8P9n9n9R6k13J78j32K16r3j51
-687A614J59m8l57N03j3k90K26k5k6PPj06j06K80m41L08jj62L53K5K5jjk15R4k15L01j27j26
-689A642O0O1n3n2J2k97L16j98J81J82k78K38j49J60K0J9k52K64j13j13q1K29j01K08l14K01
-691A792qpk47O3J16j94J54J54j94j94J48J47P0k39J86j24n7n8M6M6k89M33q3q3K22k94J89
-693A695j19j20J90N4N4K01j08R7m18P7P7k45K70Q3Q3l48J67J19j90J7J6O4O5p1p1p5K33j14
-695A683j14J51j57J96l19M19r6r7r6K10K09j83j84K84k32l8l9J68j41N1N2j44J64j05K03
-697A845j20j21N4N4n9n9K12l03L15Oj11j10LKK73k42L6k73J59J59j59L57k81K35k30Q0J57
-699A879j52J92l23J02J02p5p5R9R9k58N2m5m5P6P6p9p8K05K05l62J53J20j90l5K74m98K24
-701A643qqN2N1P1k38qpJ28J28j7j8j7j7P1P1j03j02O4k45J04k06J41J40J09k01K61k56L44
-704A927L5j79j78O1O0L3L3m5m4n7n8L68l53j08K02j91J19OOJ81j29Q7k23M93k29n1n2M5k64
-706A495L35j80K6k84p4K35M2M2k8k7J8J8K42k73J72J72k42k43M09j07N1N1j36J73q1K28m03
-708A631J12K78k39N9k52L78l45Q1k29p6K33J11J10p50L85m7K62p3K37l62J53m4m3J63j47
-710A586R4R4ql19Q8Q8K10r9J33l84K16K17o96M38j28L86j80j80POR1R0j3l22L47L6J40j69
-712A769k06L09j10j10J55l60j02M13q2q1K08l07K72k44J89J88k21Q8N0N0%l10j3j3K77k39
-714A570J93j16K74k42RJ0J73j35L8L9j87j86L81P1l62J54K89k27rrj57J52K47o2k30Q0L3
-716A791m83L29K0K39k76R0R1k23Q7RRj01K09j71J38K89k26l04M19k62M8P3k35K86k3k2k3
-718A778P7P7m64K57j37J73j12j11J03J03K5K6p6p5r5K14n3n3J99n24L31K1j01K08p3p2J02
-720A748J02p0o9K7K7k97J3O4O4K58k58K83m38J25J26LLp4p4j52J58k9K81j52j51K30p9R5
-722A764R5r8r8J46l69N38j84j58J51J9k90J80J80l07Kl7l6L40L1k27Q3N7N6l30L91j59j59
-724A581L30j85J26J27k15R4k12R8n7n7nnj40L75j24j24M50m79o7K43rrJ01k09M04l19k44
-726A469K71m5m5j00K10j19j19JJK91k25M6M6J69j41P8k32N8N9K76l4j17j17l2l2j09K00p7
-729A631K32k5l35K07j01j40L75k90J9j35L80j00K09k61M9R3R3j45j45PPK7k83J65J64k60
-731A438M61k15k15J33J32l94L28K70k46L06lm92K29k67K48K3K3j43J65k21K94j55j55L2L2
-732A608Q8Q8m7m7j06K05j44J65l0l1RQj65J43m9n0J78j32K4K3J8k91L15Om0m1J8J7q0q1R3
-735A672R4j1K99m10j00J51J50m9l58K67k48J58J58O0k50R9R8j43J67k59N0M0L9N8N9J3J4
-737A818k77K39r0r0P8P8R8k10R8R8J50j59l14nK06K07l03K13j26J84l06LJ71j38N5N5p2p2
-739A589k08L08K8K8J37j72Q1k29K36p4L8k71R0L99l91q1J96j13M0L9K1K0j8j8JJk09J00O2
-741A630O1J78j32l5l5j9j8j15J95P8P9j60j60Q8Q9l18M05J9K0k26K90p2p1N7N7l26j7J05
-743A647k03K83k33J35J35k76L4J88j21llk2k2O4O5n7n8j31L84k9k8l19J98J00k09j14J96
-745A601KKP0P0q5q4RRRJ0J49J50n28M01p2p2O3O3q8q8j1j1l7l7J18J18M2M2n96N39p7p8o
-748A597oL1L1o6K43j52j52P4L82l95q6J65J66m92K30K49k67J98j12J07k02K21r0n7n7K62
-750A822m59K74l4L4L4J89j21QRk05J05ml14J70J69k36K79q8q9j9k0K32p8l0k9J38J38l58
-752A517J56K2K1N4N4R2k17j85J25k04L11RQk36k37M05R4k79K37q9q9J50j60p6M39l14K01
-754A809j42j42M4M5qqL7L7K25k90J41j68L03k13j16j16K08j02Q5L95l30J87k0l29L11k05
-756A638O5O6p2p2p2p2J00J00n4n5J7J8J33j77j36J74J34l81N97l32k10L07j26j25K16r4L00
-758A887j0r3r4k03J06Q7Q7j05j06k2K88j90j89J7L26j35j35L36K6k50O0J18j91l3l2l3l2
-760A485k5K85k5k4j10K00m96M31j03j03L61l61J77J78l32k3L80j35j67j68R8M07j08j08o2
-762A652K48k36P4k21Q8J1J1J26J25O7o54L66L67l17pL1L1p2p1j83L32k2l31OL14M5M4j81
-764A643j81L80l41R9J00K67k48j4j4m6m6L9M0J9K0J75j35k50K64mml78L44L5L5j71J39M0
-766A807M0J11m05j40J69R8R9ql18J85j24k5k5K27k89K66m2j1j0l15M06p6p7P5P5l4l5L17
-769A941j98k37P3M8M9M8M8M7k62M7M7L2k77M64n1k33P5p2p2K55n5l5l5R6R6j61j62J19J19
-771A754K22k94K25k90n2n2K78l1l1l1J59j50J21j89R0R0k90J9J60l57K4N40j28j27J95l21
-773A534J60J61k7k6j23j23J67J67l33J82K98m24J7J6K42o7k60M9L21j96k39P1J60j48K02
-775A781l13L71j46J69l47Q5Q5j41J69P2k38J06k03J05J06m3m4R2R3O7k41J06J07j94J16k91
-777A429K25j3l23K64K64j98J13j59J51N3N3j86j86K46K46l91q3J09J10ppj45J64J06k03k04
-779A428J06O8O7l6l7O1k49K28K27k23Q6rj0o8o8l2l2J41J42j87J23j67J42J81j29j67J42
-781A728p3K36l63J53q5q4J22J22k31P7R8k13o2K47N4N3rrj06K04j98j98Q0P9lmmlM1M2J96
-783A887j13N3k55K47o3j59J50m3m3l7l6J18J18j80j80L35j80J97l19J91j19Q8Q7Q7k22nn
-785A599K1K0J41l74K77l3k83K33P7P8k77k76L55j61K98j0J50j59K1K2k17R2j28L87k32K85
-787A906k84K7j3K97j28J80j61j61L05k11r5r4J25j85L5L5K72k44j28J81k9l0RRj11J99M5
-789A751M4k92J7J20J20j52J57r4r5O6O5j93j93K99K99j66j65N6N6q6K23l90J25J31J32k26
-791A609Q4j4j3J37J36l08K08p9p9l37J79k7k8K95k20K11K11m14J01K72m49K46K47j91j91
-793A586L4L5K58k57N3k57P3P4m2m3L27J7m72K49p6p5l0K79m3K66m56O0J83j26M28n00K32
-795A777p8l9m0o7o7K81k34K42o7j83L33k36K80j52j52K08j00j00j01J92j17k14L01j20J88
-797A735k43K73q1q1K09l06K78k37m4K66l34J81M7M6o6l76L52M4j46J64o9K42m76M52p0K39
-799A999j44j45O1O2l16K00j54J54k18K98n1n0N4N4j78J32j71J39j6j6J2J1k98K18J40j69
-801A608K12r8N8N8oom25R0l2K77J41j67K57k58p3K35q0q0l30L92l3l4K4k86J79J78k34K82
-803A849k99K17l1l1k30M91k68M1M8M8n44L84n5K55j09j09l2l2K08j02k18K98m5m6n8n8L58
-805A930l63K17r3j08j09K84k4R6k12K77k39j93N28k51k51j22J87M5M6k04L11j65j66L83j33
-807A671r5K16q8q8O7O7J60j49p2p1J68j41j99N23k90J9O4O4j87J22k45O4J80j31j11J99n
-809A712nJ5J5k5k4J11J11Nl05M3M3q1K28l96q8K28q1J31J32q1K28l07M15m23K98k16R2k44
-811A531O4M32m96k1k1K56k60K33k83k06L10M09l12O8O8k29Q0J96J96k82K33k63M7l19M03
-813A834k34P4P5P4l51J65q3q3J03J04k1k0k66O63k94J6j97j97K38p1K32p8j51L64k55N5j21
-815A575J89j01j02k4K86m4m3j1j1j1j1K4K5j68J40O4k46P0P0J77l38J07J06j46j47K15K14
-817A859pqq4q5rrk9k8K46o3m4m4j24j24L20j95p4p5L38j77J35J35l22J93j79J32J31j78K13
-820A844l02J23J23o3o2nmK32p7p7p7J23j86j02M14l41L82j47j47k6k5J29J29%Jk90K26l9
-822A756l9j81J29J0RJ71j39J87l29J15J16j97J13k16R3j01K09j20J89j0j1j32J76l10K05
-824A693K25k91o5o5K05K06n04K19J21j87J91j19J14J14k76k77N81O6k04k04J96j13m4m4R2
-825A630R2p6p6J75j34j2j1M6M6J09J09j49j49L3L3K45k70N7N7J21j88l4l5MMK22q8K9K8l22
-828A496j3j3j3Q8L98l69L53L8m77K39K38k09R9l96J19M21r5l08KN3N3M1M0P8m39J10J10N3
-830A697N3N4N3q6q6k8k8J51j59m68O67o2o2RRL8L8N7k52m4m3L9L50k12R8m24N04j40j40R2
-832A675R2k41O8M9M9q5q4J67j43O1O0R9R9l2l42K45o5J77j33k2k3k95K20n7K53m05J11k24
-834A274M97l5l45M74m54J05J05n7M60l56J61p8l87J76J77j01j00O6O6M7M7J0l00k2K87r5
-836A622K15l07K08o5o6l3K76k50O0j7j8J55J55l80p1J86J87k26Q4o5o4K64k52j31J78K30
-838A875k86K49k66K4K3j78L37M7M7r8r8R5k14k4K86j85j85K74l5l5l5J88j22n6n7J90l26
-840A435L96Q7k25k25L04k12J72J71m40K81P4k36J57j51M1M1K2k87K21q8L37j78J40j69n9
-842A609n9K95k21j24J85J02k08J08J08O2m54N00k22o6o6M4M4qrO9O9j15j14K33p6r4K15k30
-844A577Q0J28J28l16qK14l02L74j41l3l3o6o5N7N6L8L7J31j79J5J5n1K58k18k19L68l54L10
-847A801k05K59k57j9K91j71j71J05J06N0N1NNl06K10o1o0l9K71L2k77RL19m22R4O8O9l30
-849A427k2J90J90m9m9llq1q1P3P2J05J05l56J61qpK05l10K70k46Q2Q2o0n9k20N03J3k97M5
-851A672M5J03k07J45j65j0j0P6P5L0L1l07K09q0K28k81K8k56M66j86J23J4k96J15J16L28
-853B006j88j18J91j5n31L23j92K39p0q0q0N6N6Q3Q3k27Q3j75J35L08%q0p9j18J92r3r2K37
-855A854p3K5k85NOJ82j26M7M7m0l9j56L60k35P5l5l5L50l73j59J49L48L9k00J09k03k02J65
-857A600j44l2K78j09K00j9l28n7O64k76L3j16j15Q9k21J28J27j46J63l98L24j32J77r3K16
-859A813k33K82j63J47j42j42Q9R0Nl06M88k34N4k56M08l14LML26j90m7m7L27l95M0M1P2k37
-861A483K25q5k39K76J52j57m8m7J34j75L35K5n0l58n6M60j66j66K84k30Q1Q2k98K17k19R1
-863A551j60L55j13j14K09l07K13K13j54j54M8M9K42o7j71J38M1k68J62J63j22j21j61J49
-865A621j03j03J42J42l2l2K60m62L18Qk53N7M4M4N8N8J3J4l18J99j11j11K19r1POK2K2K3
-867A661K2M9N0l89J27J40j69M43k79n6n5K35p5P5k34J01J01r5r4K53k62K08j01QQK51k66
-869A657k97K18K53k62J18J18Jl09K20K19l09JK00j09k34P6J85j25O8O7K9K8M5k64K18n03
-871A309K90k0R0R0r8m07O04l23J71j39J07J06j40j40R2R2j15j16K90j9k5k5p6p6L05k10J25
-873A742j84J19J18j33j32O0O1k29K86k8k7MNP9P8k75L3J05J05J5J5j36J75k90K26%%k38P2
-876A626K46o2j72J37k01k01M75m0l39J78j7l25N49j73k44O6N0M9O9O9m0m1L7L8l8l7j7j8
-878A624n9K49j23j24J42j68K58n1MMQ1k28M1M0R9R9k7k8k7k7m2m2J00k10K87k29K3K2L6k74
-880A450J58J58r2r1J34J34J28l88P6P6k95J4J24j86M67k55k3k3Q7Q7j26L90j79j78k95M27
-882A779j6j6o7o7l72N56l52L69j89J21l37L85j03j04p7K32MMj63j64K74k43K41k74K78l1
-884A668j60L56k48O0q1K29j59J52k04k03M81k40j18J91J31l84O0O1J49j61L3L4j31J78j5
-886A679j5J27j82K81k34O9O8r3K17m28K94p4p3j66J44l0l1L0K9p4M42m19R7P0k38K33p5R8
-888A746R8k43O6Q0P9k88K27m3m3k36P3p5K35l14M09KKN4k56R2R3k72L7J22J21j72j72J89
-890A611J89o3o2m3m3j42J68ooP1P2k26Q5j48L68k5k5k39K76j68j68P7P8J55j54R7k13K01
-892A717K00o4o5J29l86K53n6n0n0k5K83k19R1opj93J16K37k79L0L1N6N6r8r9R6R6k32P6K6
-895A664K5J99l16j18J91L33n95L91Q2o0o0o4o4J10J10j77J32k15R4j06j06L59j58O9O8j19
-897A669j18J1J0J1J1R4R5J07m08K70l9j67L48k42O7p4p4K8K8K03j07k3k3m3m2P7P7j16J93
-899A823%l09N8N8j84J26P5P4J73l43NNJ14j95K69k46J16J16J03k07O1O1j33J77m6m5k7k6
-901A653k0k0k0k1J7J7J14J13k76L3k89M33j08j07R3R3q7q7O7O8k6k6K84k32N9L69o04J18
-903A608J05J04j79J31n9n9l30J86Q6Q6j72L43p8p9p8p8K40k75K08j01j74J34K70m0k42k43
-905A314L89j27J08J08p9p9K1K1M0M0j42J66R6m19M02j14j65J45n8K52l67J49J02k07M4M4
-907A684J10m04J62J63j41J69k56N2N8N9o5K45k59K56J21l94L0L1kjj2j1l1l0K16r2o1K49
-909A846l60J56j48j47L95j20J89j20QRj1j0N4N3q1q2j51J59O2O2j52j52J89J90Rl00K8K9
-911A604L5L5m3m2R8R7p6K33k34k35K49K49j99j99p7p6L72j42J86j24j97J12K08l07l7l6M59
-913A913k62K38k77O5O5j41J68j60J50k09J01K4K3o4o5R0R1j34j34M0M1k4K86j65j65K31p8
-915A648n9n8P0P1R0R0j77J31l32J84RJ0p5K35n14M14l1l0L1k79K25q5O4O5j09j09J5J5J69
-918A678J70j45j44K03l12K37p2K75l4m02J13J32j77J7J8k1K89j05j04J14J15m25K98k44K71
-920A745j60j60L04oQ7Q7k80K9J81j29M5M5N2k58P2P1r8r8J53j56K4K4j70J40J79J79k34P5
-922A743n3n3M3M4p4p4Q0Q1o1o1R4R4p7p7R7k12J18J18n5n6q0q0K49o1Q5Q4m38K85J63j46
-924A720P3m42M53o3k18R2r1K17j56J53l46J70m2m3K12r7N7L66l06l06K47o1N8N7l9l9j0j1
-926A605O6O7o9o9J06J05k09J01O9k41K46k70M07l15N5N6k2k3K65k51M0L9j05j05n4K56J29
-928A879l87k13L03NNJ34j76L6L5j77L39j76J33j05j05K06j03P1P0j07j07K03l14M30m99L01
-930A681rL4k75J37J37l3l2O5O4k28Q2r2K17j52J58j91J19l7l47L81P2q7q8K22q7J9K0p8p7
-932A595J59J60r8r9M5M5m57M70k32P7n8n8K49o0m1m1j2j2p0o9N55l73J50J49j28j28M6M6
-935A810k03J06j72L45l15K01L9M0l12lL0L38k52N7k34K83L7L8l95J22J90j19J84j25j2j3
-936A665k25Q4J81j29Q5k26J23J22ppJ91l24J20j89K61m9J19l97L47L8k84K5K95k20r8r9L16
-939A718j99N8N8K94k22RJ0j09K00j74j74M47k76L5L4Ll06M2M2QL18p0o9l11M11K4K4l18r
-941A498j25N97j79j80J94j15q2q1J76J76l11jL73j43NMk85K30k78K39L67j49l09%Q4Q4k13
-943A576L03l35J80j80J29l2l3J44j66K1L30m89K6J3J4J29J29J29j80P6k33M4M4K29k87J01
-945A682J00l13mO1O1K30p9J14j95l0l0j84L31K2K1k3k3N5N5j77J33j24J86m52K69J02J02
-947A890j12j11J20J19l06K09k62M7O0O0kjjkj21j22J37J36J7J8j06j05k7M89j95j94K61k54
-949A642L6L6o5o5J3J2O0N9J36l79q6O36l37k8jjJ16j94K7K8k24M98k38P1j3j3l69L52K17
-951A926k98J65j44j95J14J53j56L8L7jjJ73j37j8j7L50l72J98j11j23J85l61J55J80j29J51
-953A762l64M67k55J37J37j66j66j7j6l5l6K72l8P8P9l00RK67m3q1q1M1k68L53j61o6o5L03
-955A747ol09K06J94l23J87J87l58J58k61M60k47O3q6K24r3r3MLm6m6L02qk43O6J4k94K93
-957A695k22M8M8qrM56k66jl10K19r0J73l43K38p2K30q0k92K23J6J5R3R3m67K54J96j13q7
-960A637K22o8o8J49j60J5J4o5o5R0R0j39j39L6L5k7K83K5k84J12J12o2o2m8m8m9m8J20J19
-962A727l5l6n5n6L05m16M41k82J96l20K32p7O4O5m8m9J07k03K10r8J97j11K23k92J72j37
-964A724j54J55j8j9j82J26m8m7mmm3K67J02k07J60J61k58N2J4J3P6k33J73j37M0k70K59n0
-966A648k23M99j00j00P3k37R3R2j69j69Q9Q9K6K7K6K6r5r5M86k37j00K10o8o8j30J78p2p3
-968A626M3M3l4l4J4J4noJ70j41K1k88K51k64J61J61j16j16J35j75J53J53J1J1l27J88N2N3
-970A754j28j28J30J30j09j09%JL41l82Q3Q3J27j82pL01l80p1L55j61j09M06j93j93N9k49
-972A369L69j47k0k0M12l10J80j30p8p8P8P8k51N9J08J09m6m6K14r4p5p5m7m6J86j23J66j43
-974A599o6o6J63J63r5r5O8O8q7q7p7p7k25M96r6r7K58k58oL03k77M45l85J29j15J95j89J20
-976A709j89J20j78J31nml0K79k56k56J67J66l49L73k79M44p2p2m9m9M15j01k75L5k10R9K02
-979A766j07m9m9n9K51p8p8j4j4j4j3Q0P9J96l20J32j78K92j7m9m9m9n0j32J77KLo8o8j01
-981A422M15k14k14J80J79o3o2j98L18m6m5j4j3qrqrO8O7RJ0m4K65l40l1J98J99m53O3P1k38
-983A455K97j3p5p5J77j33j71J38J76l39L5L45j19j20R9R8j60j59K29K30j51j51J28j81P0
-985A630P0%jk90K26J4J5K7K7J39j70j12M04k49O0j59j58R9J00q8q7K07l08J37J36p1p2K58
-987A784n2o5o5L2L41l97J18o9K40k06k05J42j67J37J37j14J96k48O2j13J97j11j11L53j63
-989A653N0N0k7k7L44l78j65J45J71j37lkj25J84J0k99K24q5N1N0K8k81K21q8j2j3J68J68
-991A875m48K73l27J90p4K36J1k99R7R6j93L22k78L0J8L27m24K98m38K85J90j20K16r4k27
-993A542Q3j4j4j21J89J89j20m5m4R1k18K75l5k08J01k3k2N19m10o9o9M7M7j98J12L4L4n7
-995A596K52p7p7r4r5K66m3l57J59J77j31N1N1o5K45j18j18J98j11J22l94J68J67k62K55O1
-997A826k49j8j8O0N9k08J01K30K30l03M18n35j9K0K1L62l59R0k19M5M5K75l3n24J98J69J69
-999A833j46j47K06K07k77k78K49o0O8O9k38K78k44K72R8k11nnm3m4k50O0L44j71O1O1o6o7
-1001A554k46M75J40l75J35j75J34J34n9n9J29j81J87j22j51J58l6l5J4J4K33p7m58K63J35
-1003A731j75L53j64kkR6m19N7L67j12j13L0K9N5m60L77j38K69K70o64K63J23j86k05J04R2
-1005A576R1k4k4n3K56k46O2M1M1k88K27k06J04K32k83L26J7k85K30RRj7j6l18qJ78J79j17
-1008A693j16K12r7M5M5l61L60j13J97j07j07J27j83k8K81j95j96J52j57J41J40j37j37J50
-1009A609J50m11L11m3m4J95j14k11R8K8K7K57k59K06j04n7n8j8j9L46L6j51j51r8r7L27j87
-1011A568L05nm29Q6K41o9j20j21J31J30k5k5j6j7J97l20P2P2M0k69K49o0r9M17l61n3L67
-1013A886l55O5O6j15j16j6K92j78J32k01L15r7K12l80J35n2K58J9K0N1m64K15r5O6O6k21
-1015A508Q9Q8Q9k55N5j39J71N9O0n7n6p6K34JKj83J28j44J66J0J1l77L46p0p0J68j41j56
-1018A461J54L8L7m4m4o4K45j61j62J67j42J75j35R8R8j7j7j7j6PQj67J43M7M7j65L50n23
-1020A401M05k27Q3l22J93N8N8O8k41L38l83Q6Q6k50K67M9M9k9k8K03l13m2K67r3r4J00R9
-1022A788j99J09M5M5k98K18p3p2j4j3J93j16k23K93j7j6o0o0P5P6J94j14p6p6j61J49m5K65
-1024A817j2j3n1n1j59J51J44l72N02k20k14L02p9p8O4O3k70K45JJQ9m26K77k39L04k12p0
-1026A494M46l46l6k29K86K51n9m13L09j2j1L3L4n0n1n0n0QPj21O01l48l9j4j3klR4R4k72
-1028A538L8L08k07n2n3J86l30K17r3J13j96K42k74lL07k67M2J25J26M1k69K72k43L3L2k12
-1030A421L03l2l2N9N8O9k42J07J07j70J39l25J91K9L0j13J97l6l6j7l26L10JM6M6J51l64
-1032A571q7M28l34k4j2j1L7L7J1k98N34j89j11J98j90J19k3K87m07J10ppN7N6j18J92j28
-1034A691j29l2l3J63J63j98j98Q4Q4Q4Q4j19j18L6L7J2J2j17J93l12M10k08L07j04m13L28
-1036A707J8O3O3n63J60M44k77K90k26Q3k26ppJ0J1J1J0K3K2j32J77j18J92k14R5q2q2L4L4
-1039A513L44n85O47k82k60K56MNr9K11k99K17j66L49l02l01M83l3N1k58J77j32K42m80L39
-1040A641j78K23K22k20k20J41J40k3k4J50j59r8r8J92j18K27q2q2q2J28J28N7m59K31K31
-1042A868l36k7P5P5J07m08L04nJJj70J40K37k79J17j92J05J04k3k4J12m04J81J81noM7M8
-1045A824m9m9M6k63N3k57M60n6M1m75J99J99l94L27Q9R0j24j23J21J22l24J93M6M6j21j21
-1047A500L70l52J84j26p9M36j30j31M5M6O4O4l60n1L42L2k54K62k03k03J14J14k14R4J8J7
-1048A599L7L6l0l0J44j66k5k6J88j22J68j41J49l66J03J04J4J4j33J77k88K28lmK8K9q5q5
-1051A514J67j43J47J47j30j30K1K0J36j73o1K47j20J90r5r6J82l34K53k63K85k30P5P6O2
-1053A747O3k18R1k56N3J49J48k76K39j05j04K95k20L9L8OPrqJ66j44m3m2J95l20L47j69N7
-1055A726N7J9m96L28J9j19j18J66J65l99L22L41j74m37M92P8k30J76l39Q6Q6j4j3j4j4j5
-1057A679j5j5j5m9m9j45J64M3M2K82m41K75k40Q1Q2n2n3J22J22j41J69k50K65m54K68L00
-1059A975m22K0K0k5k5N2N3J69l46K55n3k40O9J47J47r2r1M6M5l60L61J7J7j6j6m3m3M1L50
-1061B012j73j74k06L10K2k86K16r3K98k17j20J88m0m0k91K24j18J90q0K30l11M11l42J73
-1063A783j48j48j54J55K21q8j84L30j06j06K55n4M2M2q7q6J49l66J56j54L46L6j37j37j73
-1065A387L43j34j35L17j98o3o3K30K31j30j30L4L5N3N4k75L5J5J6J30J29m4m4N7k52k0k0
-1067A558J91j19j18J91n2n3j3j4o7K43O9O8j05j06m34K88Q3Q3ppn6K54l65J51K5K5k71L8
-1069A480L3L3L43j74j3j4o5o5K10j00J90j19k69M1J24J24k33P6N6N7j37j36kjJ26j83J65
-1071A547J65j27J83o9o9j6j7K15l00M88m41O9O8j70J39J58j51j17J92m6m6k81K35p4K36q4
-1073A687q4J87j23mmn6M59k94k95K86k30R5R5j88J20qqJ40j69K79m42K79k36J37l78M40k81
-1075A404J16J16poL1L0p9p9K71k45l2K77k78L2l8K70l5l5m8m8J71l45M9L58k02J07J07k02
-1077A660J67j42L1L2j51J59j12J97j85j85J38J37l60L62o4o4P9k29J18J18j36J73N0k58M37
-1079A972k85K5K5q2q1K08l07J20J20Q7Q8q0q0m8m8k02L13j31J78j92J18nmk03L13k29Q1q1
-1081A590q0L00j0l06K10j77J32j84J26J25j84J74j36p7K31j05j06O8O8rrO8O8j35j35K13
-1083A720r6n3K57j37j36L77l44r3K16j54J55j16O06n07Qj34J76j14J95J43l72J97l19L38
-1085A813j77L12m09j51L64j93J16l8M77m12j02J16J16n1n1k45M78m95M34j20j21j52j52K79
-1087A636k9J87J88n98J23J11J11P2k37N9O0j34J75m4m5p0p0L75l47M0L9J53j56jkJ44j66
-1089A574J63j47J60j49N7k53p0M45l47L74ppk07L09m29K92J12m03L21J2j94J15R6k14L8L7
-1091A678J03k08n2n3K59n1n1n1K10j00o8K42l61J55N8k51J02J03r1K18n1n0JJk23K94R9k09
-1093A653n6n7P9P9N6N5k73L6J27J26o0l70L46L6k40O9r4r5Q0Q0J4J4r5r6M41p5j45j46J08
-1095A597J07m7m7kkr9K11l6l6K16r4Q5k24K97k17j32j31K80k34J52J52j06j06j79L35k05
-1097A535J03L8L8m0m0R7k14J93j17J83j26j45J63ppM5M4l19J96M7k61M90k6n53L74R0k18
-1099A563M77o57K34p5K72k43L42l80J04J03K74m48K09j01nnk5k4J8J9J48j61L55l66n7n7
-1101A514n0n1K78l1q9r0K20q9MMk28K88j2j2n7K52j45J63k80k81M31q4j23J86j15j15J56
-1103A644j53K0K1L29l92J41J40J15j95k6k5L2L3K6K7n0n1m6m5N1N1j69J40k26Q2K28q2m3
-1105A577m3N2N2J16j93K70k47J99j11P3P3k63k63N35l93n1M64l03K11J29j81l0l0m9m9J3
-1107A558J4R1R0J8J9r2r1k98M25k72K44L7L8j30j30L40l81K4K5O8O8rrr0r0K13K13m52K69
-1110A710P0k40k45K71n9n8L30K1k69M52m38j29J86J87J92j18j18j18J73j36K89m32N4N4j1
-1111A618j0ll11N13lo2o2j13J96k9k9j06K04r5r5r4K15r7r6p7M39l24J92K31p8n05K18N0
-1114A687N0m5m5m5m5P4P3j33J77J05m10RRM16l07n5n5J69J69l79J36O3O3J7J7j34j34L4L43
-1116A824L9k70j41J68j41L75L9k70j15J94l09M13k39P0K31k84P3P4j53J58O0k49M67m62O9
-1118A621O8J1J1k7k6K63k52J5J5j27j26L93j22j9j8R8m18L17j98J75J75j14j15J59J58k02
-1120A715k02J27J26k8k8L2L3K64m57R0k19k38M83j0j0N5k55N5N4L00o29K47K47o8o9PPk44
-1122A385O5O4O4J16J15l21J95j15j15K05j04j04K05k7k7qqK1K1j52J56l7l7J57j53L0L0K81
-1124A902k34J41j68J47j62J2J1j18j17M28q7O8O7k13R6m65M63P1k37j16j15M02j14K1K2o6
-1126A639o5l17M05L0L0jkk3k3k3k3R7R8n8n7m8m8K9L0k8k7M9N0M3M3K75m46K89k1k20Q9p1
-1128A695p1J23J23k42O7k03J06Q5Q4n0n0o3o3r5M21j72j72l7K72k54N6k47M75j7j7j45J63
-1130A772m2m2K09j00l8l46L55j59j9j9K58k57m1K68j32J78K4k85r2r2J99J98L1k79k06J02
-1132A445L54j61M2M1j97J13L41j74j04j03k81K9K99k16J40J41M3k65j2K99l02M21klj31j31
-1134A626J01k09kkk27K90J73J73l84p5J12J12L3L3j41j42K49o1L07lk99J0k8k9K0K0K0J9
-1137A696k0k0K5K6l46L76j45L70k28Q1m1m1j54J56k63K52l40L82l14K01L43j72j60J50j12
-1138A702J97k66M3l5K75m8l57l4K76J98l17J75j33j86J24K06j03m6m5q5K26q5q4j45J65r
-1140A609j0q6q7J6L26k27Q2r2r2K11r8l31L92o7o6M23r3j34j34K65m4j08j09K01j08K7K7
-1142A693K97k18m2m2p4p4%%l8K70L6k74L5k74O35k93j00K09j95J14qrj98L17PQJ30j79on
-1145A722qrK37k79K82m40Q9Q9q5q5K44o6J7J6k92K23J7J7M9M9r6r6N8N9rrk8k8J31j77M02
-1147A994l20k0j9Q9R0j1j1k82K34j72J37mnq4q4K45o5LLLLj67J42l1l2LMM9M9j76N46k21
-1150A890k20O6O6q9q8M8M8j26j26K06j03P0P1%jK52m71P1P0K6K5R0R0l23j3q5K26j88L28
-1152A810l48J67O4O4n2n2J80l36M08n20R2R2K12l02K57n1j51J58J38j70l7l7q9q9L44j72
-1154A580Q6Q6J05m10Q6L95k97J3L3L2k16R4P4k35K35p3J00k09K3K3J97j12o4K46k76L3j5
-1156A534j6J59J59jjj55j56OOJ60J61j46j45K9K8j60J50N3N2N6N5o8o7k04L11j34J76l24
-1158A518j4J91J92j72j73q9K21j20j19N4N5p0o9Q5Q5M6M7l1l1m1m0K10r8QRQQj52J56P9k30
-1160A523J96J96m30K92m44M85j48j48J61J61j16j17K71l9j94J16q1q2q1K28l9m0J03J02J44
-1162B019l72K40k76k23K91j1j1k13R7P8P7q7q7K3K3M49k72m1m0L0k78L46L7k57N2J68j41
-1164A621K96j4p2p2l67L54j49j49L24J4j92j92L44L4m9m9q8q8J70J70k02k02J59J58k8k8
-1166A703j06j05R0R1j41J68j3K97o18L10q1K29K48k67j43j44K50k66K18r2m6K62j19j19l06
-1168A300M16k47M75k46k47K3K2K55n5Ol03M83m45M21l01J4J4K66k49M0M0j22j22K45k71J09
-1170A521J09m0l48N37K2q8q7J28j81P1P1L2L1k19R0J00J01L6k74J2J2m6K63N3k57J11j98
-1172A562J36J37m44K79J9J9O4O4j13j13M2M1o0o0R5R5m7m7o6o7J28j82L98l24j5j4M30m97
-1174A460K93k22M15l06nnQRJ00k09J19J20m5m4K38p0l22J93J41l74L14k01r9M17k0l30J86
-1176A761j23J92j17k39k40L90Q1l5l6J46l71P5P4j4j5J73J73m06J09j15J93J45j64J06J07
-1178A850j02j01M0k69L30j85O6O6l7l47N05m24K05K06j62J47k78L1n9K51j0l20J32J31j6
-1180A650j7j52L64k04k03L96j20j81J28L09m13K58n1j80j80J14J15N7N6k52N7L60j56k46
-1182A509K69l62L60j92J17K0K0k78K38l10K06j84L32q0K28k51N8K13l03j59J50J18J17k49
-1184A587N9r5r5nL03n7n8J97l18J26J27q8q8O6O7j14j14L70l52M0M0j02K08m7m7K62k53o6
-1186A553o6N6N6J05J04J24j86J34J34k92k91L56l66K1L30j6j6k87K29J8J7j43L72m08r9L08
-1188A747k08n6n5K41o8K8K7QQk1k1n3n3K65k51L9L9l3l3M4M4J10J10l41l2K8k82O21l07j25
-1190A420L90l18rL51j64M9M9n26M02L4L4j62j62L66j49J67j42k0k0J51j58J6J5K9K9j46J64
-1192A690j07j06J89J90k99J1m2m1L52j63j31j32K00K00k45K71n5n5m2m2L07lk16R4m25K97
-1194A697k06L09k49N9J18J17l85L37n0n1j56J53kkj56J53k2k1J7J6llJ23j87J61j48m3m3
-1196A533R2R2k0k1L28l95p5K34o2o3J22J21k08J02k8k9k8k9J43j68J43l74J69J68l08K07
-1198A646j5j5K23q6l05K11N7N6q0q1R4R3k03J06K9K9l17qK62k52R5R6k07L09k52N7J73l42
-1201A373L99j16J42j68J49j61J80J80l66J49j42j41M3M2M3M2K9K9O1O1l47J69m4m3J30J31
-1203A824j98J11J7J8m0m0m5m4m4K65k28Q1J98j12j74J36l08M13j98j97K08K09k02k01M17
-1205A866r8N6m59M62k59J61J61j22j22j77J33L45j71j64J46j84j83M90k32P1k38J63j47L36
-1206A834K7j14j15j54J56P7P6k33P6J8J8j36J73kkJ8J8l7l8l7l7n2n3Q3Q3K31p8k65k65J18
-1209A388J19J37J38k63M6K84k31J89l26K79k36J27j81NOL53j62qpK6L36o38K91Q0k29J58
-1211A681J58j07j08l1l0N4N4j01j00N5N6r9r9K27K28l08KJ88J89n85N50j52j51P4P4o1o1
-1213A597j64L51l69J46J91J91m35K88j18j18MNK5K4r7K13l8l9n7n7P8P8Q5k25k63K52noJ69
-1215A706j41K97k18J88l28O0O1m9K60k53N5k1k2K0K0K32k83O8O8j18j19J12J11k75L5M19
-1217A885n09M84k38J50l66J89j21J62j46K27q3k95M26k32K85j4l23J41J41m2m2J51j58j22
-1219A550J87k26Q4L75l48P9P8o4o4J95l22K37k78J21j89L16j99L80l41K95j4j44j43L3L2
-1221A630L2L3K1K2j33j33J02J02k07L08j5l25N19o15L09L08k46k46J93j17J54J54k79L0J1
-1223A612J0j10j10M31k90J97j12r8K10ql17J86j24L07ll5l44J63J63j27L89l01QKKR1k20
-1225A572K78k39k00L16J3J3r8K12p8l87L55j60j61L56L17o11J31J30l21J95l08K08R1R1L9
-1226A754M0o59M76ppN5N5N5N5j38j39M9M9k05L12j1j1J16l99L35j80O4O3J09J09j86j86P2
-1229A640P1j8j9JJj18J91Q8Q7n60N73l23J93l43J72K24k92M23n06N45j76q7q6l5l5j6K93
-1231A888k93J6QL18P2m43J46j64L01k15k28K87klk02L13j31j31R4R4Q1k28K74k42K9K9j3
-1233A655j3OPj85J25J26j85l6l6K93j7l04NJ54J53l1l39K47k69L40j74K24q4J21l94J35J34
-1235A658K4K4M4M3l20j2M66n0k95k95M72m3l40L82k63M7K14l01J82j27j8j8K53k62J11J11
-1237A687M7M7O9m46K24K24k05J05j98J11k18N05j73j72K63k52L8L7j0j1RQj48J61j3j3J9
-1239A695J9P0k38q0M36l24j6K56n4m7l57K09K10q7q7J55j55j3j2J86l29J16J15lmK8K9l00
-1241A418K15K16l00O1O0J0RJ45j64K03j06k22Q7K23q7j13j13L12k04RJ0k4k3J9J9j75J35
-1243A620K44o5k7k6j28j28K78K78m57K65N9N9m75K47j78J31p5p5P3L83n57J65K23k93L0K9
-1245A600j76J32L0L0K9L0J85j25j25j25K71l8j22j21J52J52k93K23m7m7j88J20J82J82j41
-1247A770j40J5L24m81L4K8L37j46j46m2K67k36P4j%J9J9j03j03L30J9r3r3M2M3j18j17J8
-1249A520J8L08kk40P0p9K31k53N7k8k7K5K4k67K48J32j77N7N7k34K82j69J41p9p9j12j13
-1251A311N64l64j7j6L89j26k23Q6K09j00j9j8J17J17j28j28K7K7r5r5L17j98J69l47K40o9
-1253A630j3j3R0R0J94l23j28J80l7l6K7K8K86k30l27L95k12R8n0n1J80j29k65K51J80j29
-1255A686r1M25o75M6J37J36j12j12M2M2klm2K68J84j26l06MM64k58j9j9K14l01K1K1j14M01
-1257A911j98J12k46O3r1r1R8R7J17j93L2L1o5o6P2P2ooN5N4k3k3J6J6k9l0j82L33l44J72
-1260A658R8k11nL04k22Q7k73L6L08k08NL15k07k08K24k91L65j51J26j84O9O8L39j77j22j22
-1262A621J23J23k54N4N5N4k58N2L2L2JJL3L4j66L49l86J30J8J7j44J66J88j21j86L30l52
-1264A546J63o2o2j68L47l49L73j7j8j27j28N5N5P4P4k58N2j3j3k4M92m82j72N45j77k9k9
-1266A648K22q7l5l5k73K44o6K43k72k72K75k40K80l0Q7k23L92l29P6P7k31P9J81J82l31k2
-1268A540L40L0k11k11L31l91R2R2M7M7l7l7j7j8j27J82QQK5K4J98j11q8q9P9P9k61K55l5
-1270A744l5l1l2l2l2RQk4k4K63k52K11r7q3q2J75J76k26Q3Q4Q4j90J20j32J78k76L3N2N2
-1272A724j51J59Q2k28K4K3Q2Q1q8q9j07K01QRK7k82K18r2j4j4R7R6p7p7Q6k24L75j40Q3k27
-1274A565J01J02k92K23qrm00N28j68J41r5r6j8j8K83k6m46K77K43k73j44J66K59k57K27q3
-1276A782k1k0m0m0J22J23o50M83j85J23p6K34r6r5P8P9l0l0l78L43J33j77K16r3r6r7P1P0
-1278A733k67K48m2m2K5K5N7N7l25J91K3K3K43k73q0q0J38j71L25j91j07M10k22Q7j65J46
-1280A766k61M8O3O3j5K95j99j98R8R9j57J53j76j75Q8Q9q6q5L09%%%J32j77J6J7r1K20M5
-1283A881k64P4k35k10N13j29J81l2l41R6R5p8p9Q4Q5K00j09j43J66j04j04O4O5j48L68j59
-1285A737j60K41K40r07Q47l92q2R7R7j54L61l69o0k7k8j9K89l8l9JJR9k12N2N1L2L2j79j80
-1287A331L69j47M6M7M6M6k89K27l7K71l98L23J11j98j34j33L82P3j38j38J7J6j62J47k97
-1289A381J1L18Rn0K60k57k58K46K45l62n3L08kppj80j81J01J01J33J33l32J83j0j1j18J92
-1291A793j83j83M74k49j71J38J86J87m13L08m28K94o7o7j09j09L35j79KLJ45J45l07LK29
-1293A777k87L54l69L35K5o7o7k8k8M5k64J67J68j40j40L11Jk56N4n6K54j63j62L41l82J40
-1295A563J40k40K75k08L07j24j24J44j66j0j1J99j11J15m01M5L55J2J3j65J45J64j45m8K62
-1297A986l44J71k92K23n5n4N1k59L28j88K15l01J12J12k05k05J94j14K41k74K48o2k2k2L97
-1299A881l25j40L76k49k49M27q9J17j91R1R2J11j98k26Q2J74j37L67l56N1N1j70J39L72l51
-1300A650j37j38K29N39m22j12m9K61l12K03l00M22j68J41j23j22j7K93j1l19L62l60L88l34
-1302A564L78l44J8J7l0l1KKj34L80l86J29K75k40J78j31j23j22K57k58M81k41k1k2Q4Q3K5
-1304A790K6k33P7r7K12k04J06o8o8J13j95N6N5JJl1M84j98j99q9r0J66J65r3r2L0L0K10l05
-1307A560K43k73Q1Q1p0K38j74j74j07K01J63J63m1l50Q2Q2m4m4o3o3K46o3J30j79NMJ92j18
-1309A708j89L27k41K76l99J18K33m89K85k32oL03J2J2k78M43j98J10k89K27j71J38mmJ26
-1311A818J25k36k36J80J80K12l03k0k1r1K18P1k37J3J3J79j31P6P5k08L08l12jm8m7K68m1
-1313A804m04L19j1j0j88J22NOJ78j31j31j32K51o0j36J73OPM6k64J66J67k01J08K02j08k43
-1315A541O7qqM3M3k49K65k4K85l29j9k0j9L5L6M60k61l20j2K8K7P1P1j81J29L5L6j00j00
-1317A522K7K8K46o3l30L91k40P0K06l09R6k12J55J54l8l9J31j79K40k76K74m48J00J00l6
-1319A570K74k09R9j77J32k3k2O4O4j09j10K54n5j91J19j09K01k25Q5J72j38l69L52R4k14
-1321A529p4K37lL08k80L0L2L2j04j04R5R4j63j63O9O8N6k53L55j61J29j80J17J16k31P7r7
-1323A531r8R5R6k6K84j47j48k2k2Q7Q8k74K43K80m41Q7Q7r4r4j0L00j26J83j92j93oL04q
-1325A764l16L1L1J80J79k32P6k52N7J60J60q5q5K4K5K10n13K23q7L0K9q7q7K05j04O9P0J4
-1327A689J4j59J49k4k4J4J5j63J48J28j82K36p3o1K49k86K31l44l4P7P8n2n2j44L71k93J7
-1329A525J66j42k40K76P7P8k58K57q2q3K8K7j35j35R8R7j6j5Q1Q1q5K23k72L7J45j65K03
-1331A771j07N7N6j11j11K13r6j55J55q4K24m13L09pqk52K64n6n6m4m3J97j12L39l83L5L5
-1333A617l01K16J36J37r6r5j27J82m9n0j73J35ooj56L60j43L72q5q5n3n2poj17M00j76j75
-1335A597J08J07k83K6J3J4K77l2k70K45n14M14K1K1j18J92j44j43j5K95j63J47R2m24L4L4
-1337A531L59j57j18J91j6j5k66M2j70L45k74K41j86J22L9L9L7k71K38p2J56j54j9j8J94j15
-1339A683k89K26j81J28L2k78K18K18j36j36K0K1J81l34R5R6Q2Q3k07J02NNJ7J7L6L6k30P9
-1341A589M28n01O1O0j91J19K33p7k70M53k28Q1j76J33J68l47l8l7P7P8L15o12K15K14l59
-1343A388L62j67J42K38m83J18J18J4J5k00J09q3q4K06j03K83k32J5J6j71J38j52J57J00k10
-1345A534J4J5K66k50J06k03J00J00j6l26L26J6r7K13n8n8p6p5o9K40j64j64O22n12N7N8l04
-1347A295K12l3l2K18r1J77l40L31K2n38N97o0o1m0m0K68k46j34J76K59k56q7q7M41k80rj0
-1349A652n5n4R8R9k10R8k00J08m6m6P9P9J24J24m17L05J05k05j96L19j64J45p0p1l2l2l9
-1351A498K70n9n8J2J2j62J48n4n4J21J20p3p3j38J72K72m49n6n7M53o3k36P2K66k49N9O0
-1354A754m3m4KKk26M96m58N8O5O4R7R6j55j55Q3Q3J13j97J51j59O5O4M5M5q7q7j06K03j4
-1356A755j3OOl0k9k03J05O3O3m21N08j89J21NNk9k8rrl63n4K68K68k57K58l61n1J80J81j29
-1358A617J81j11j12K18r2Pl01M14l08R9J00k17L00k33P7R0R0j29j29M5M5r0K19j09j10J12
-1360A673J12k4k4j30J80j69J41j53j54K1K1J85J85l63J53J23J24l73J43q9K21ol14J53J53
-1362A789k26k27K47K47j1j1M0L9l85L36N9k50j85J23l7K72k12R8j37j38L85j31l73N56j22
-1364A746j21k22K95J59j51Ml06L78j38J07k02q0q0L13Nr9r9J82j28M6M7m1m0L46l75J46j63
-1366A529K95j4p8p8q5K25k91K25k20k19M53J45j85J25l07K09m2m3j91J19K15l01K12r7M4
-1368A645M4P5P5k54N6r6r6P8P8P7P7pl16J71J70l26J90K75k40Q1Q2j79j79R7R8q3K25m25
-1370A393R0K77k38O4O4J19j91j7j7K5K5k46K70q5K24k65M4K47o3j98J12R4R5k34P5J34j76
-1372A622J72j38J55j55%jq5q6K82k34M1M1RL18l67n8K39p0j45J65k9k9KKKKM2M3k08J01j7
-1374A616j7j52j52J58J57K34p4m12N17m12L10j92J17M6M6j8l28K91k25J52J52j32J78j32
-1376A728j32L71l51j01j01L69j46J10m06J42J43k16L01K9L0k73L6lkK00j09L3L3J39l76L6
-1378A484L6L94j21j8l27J17J17J18j93J66J66r3r2j50J59j89J21N1N0j87L27l61J53P0k39
-1380A559P1P1K25q4q5q5p3p3K86m35J05J06K55n4n4n4N8k52J81J80j00j00q0q1NL14n23J98
-1382A481R5R5O3O3q7q7j0rl9l9J36j74L5L4j58J50M0L9L49j67j24j25q0q0J80J80p8p8Q9
-1384A694Q9k20Q9n3K57p2p2O2k48J00J01k04J05j1j1K28q3R2k17R4k16J13j97R6R6j17J93
-1386A688L8k71L73O3k53N6J7J7J9J9j36j36MNM9N0L02k13P6P7j68j69Q9Q9n1n1L16j99o5
-1389A635o5j3K96q2q3o3o3K5K6K5K5j00j00N4N5R8R9l07M14j59j59j14M02l19J97J14j96
-1391A642PPJ42j67J53j56k2k1J66j44L02k15J54j56j4j4l7l7K54k63N8N8j49j48L05lmmJ66
-1393A860j45J46l69K87k2Nl06K42k74N58j65j13j12J00J00M8M8j07j06L5L5j19j20J48J48
-1395A802opk06k07P1P1L5L44k29Q1k94K23j7j6k49K66j97J11L8L8P6k33L1L2L60k59q1q2
-1397A496j91M28r4K16j77j78O8O7O8O8r6r6K71l47n0K61l0l0Q8Q9o6o7q0q1J13J13k12M07
-1399A958r5r5o3o4k75L43R8k10j7K92o9o9k04k04K99K99M1n77L84k34P5P5KLl7l6l37K81
-1401A564Q8Q8l2l3l2l3K6K6K5K6n6n6R9R9q0q0P5P5M0M1l85K34n5n4k10M10j09j08j60M58
-1404A891p3p3j5j5k87K2M54j65p8p7L8L8Q4Q5m00K20j08K02l01L18J03k06O4k44L69k50J17
-1406A713j91r7K13J9J9p2p3Q2Q3R6R7K0k90K49n9L7k72n9n9M04l16O1O2llN9k52M13j03j58
-1408A620J51k28Q0M1M1J37j72J41j69J41j69J30j79K58n0k65K50j36j36J65J65q7q6J95j14
-1410A724l6l7k41K74J38j70J46j62N0N0O0k49Q6Q6k64K52k51K65L3L3r0K20l62n2M4M5j90
-1412A402J20P5P5k0k0k0k0m9m9Q0Q1m6m5m6m5J85J86j88J21l28J87ooj54j54M19r6p0p0K84
-1414A783k32K77k39J99l16N15jl03NooR0k19J95j14j66J43K01l16K97j2m0m0k52N7J79j30
-1416A549Q2Q2j32J78n5n4L08o20L59N0qpO9k40L2L2J2J2j1j2Q5k25J06J06j0j0J68j40j09
-1418A597K01k58K58p0l80J59J60j11j11L13Lj51j51M03l19K3L32l41J75k90K26K91k25J23
-1420A857j86J22j86p7K32r0r0N8N8n0n0M7M7k08J02L27j88J67j41p8p7J53J54l05Nl2l2K78
-1422A817k39mnJ25l91K56K57j81J28j27j26J95J96k73L7M3L52l60n1j15J95K19r1l48J67
-1424A676J95l21L11k05j60J49J04J05k30K86l06KJ49J49j48j47L42j74j47j48K18k98n3K57
-1426A606m0m0J60J60j40j40J82j27j53J57K1L31j80j79K07l09M2M1K02j07l9K70k27Q3n7
-1428A724n7N9N9o4K45M5k65l12K03P4P4k07k07J99j10j7j7K47o2N4k55J32J32q3q2M6M6N0
-1430A651N0j24J86j7j6j58L58l2l1k32k31K04K03k02J07p7p7L8L9k2K87j90J19M3M3r9r9
-1432A721k71L8J09k00M81m46L14k02K92k25P9k30N0N0K06j05K2K1K1K2p4K35k54k55O5L73
-1434A837ol16M10l12R4R4j56J53m84O50l99L24l34k5J85j24J98l18K52k63P3P2L1L2L2L2
-1436A732o9o9K15r5l09K07m5m5K44o7J34j76j56L59k34k33K46K46j09j08K94j5j76j76p9
-1438A516p9L21J1l40L82j40J69j23j24J99j11l7l6J24J25q8q8l0l0P2k38L43l80L7L7L92
-1440A884j24k82K33j85J24o4o4m4m4J54J54j49J60j44j44K30p9O7O7k9k9j1j1RRk43O7J95
-1442A707j14JJK72k44M3M3j83L33k32P7l2l2k76K40J50J50k72L8j37J74l33L89n6n6j67J42
-1444A626j61L55l89J26J51j57K7k81K92K92l77J39K9K9r1r1k6K83N2k57j02K07K2k87K15
-1446A626r4J79j29ppL61j53j22j21R1R1q3K26k0k1j56j57J18J18nnl70J46L00k15M4M4O3
-1448A742k46K94m27Q2Q2L56j60k5k4Q2Q2k02J08O4m52J16J16Q2Q3k27Q3o5K43r7r8J82l34
-1450A440m3K66k03J06J06J07m8m7J0J1K0k90M0L9J8J8R6k15J42j67l2K77Q1Q1j58j58J63
-1452A660J63M7m68M52k69K7K7o5o5J87j23P6P5k1k1j05j05L78l44L9L8R1k20J53J53j95J15
-1455A680l4l4K36p2o8o8q7q7M5M4J87j23K50k64j4j3K02j07J00R9l28J88k4k5N1N2l74J41
-1457A553m3K65l0l1k3k3j38L77k66M3m1m0J34j75jjJ12J12m10N17n5n5m41M86j61j61L2L2
-1459A568J74j35J16J17j75j76J54j56J22J22j87j87L58j56J97j11l34L87J43l73L44j72j07
-1461A533K03J45j65K9K9L3L2k58K58m8m7J39l76O5L74n15K07J59j50K18n05J27J28J01k08
-1462A508J55J54j03j03q7K22M8M8j56j56J59J59m69M59m3l53M1M1KL12l6l7O0O1r0q9j67
-1465A540J42k10R9n6n5J47J48p1K38m54O3J7J7J54l63J67J66J11j98k3K85k35P4o2o1j77
-1467A403J32Q0Q1K03l11J71j38j12J97K4K3k42O8O8O8n8K52l22j3j52L62J12j98N3N4k76
-1468A529L5j67J44n0K59N9k50k04N17j68j68J55J54j42J68j94j93K63k53J8L28j32j32M3
-1470A619M2N5N5k2k2l3l4o5o6K82k33K12r8L9k71L10k06Q3k27K83k34N9N8N9N8j27L89k31
-1472A734Q0j06j06j64J45n8K52j42j41QL18M1k69K02j06j07j07L2L2K38p1j59L58k81K8k6
-1474A625k6ppM6M5j09K00k03J06j64L52k35P4o8o7opK84k32K4K5J85j24j95J14K11l05O4
-1477A600O3j42J66J1J0k99M23j21j21J82J82k41k42L26j90j57J52O8O9Q5m31K20r0j20L95
-1478A798k36K79R1m25L74j41l45J71p3p4l2l1M13j03K6K6n2n1k42K74M9k61L76j39j59j58
-1480A355L65j51j5j5J7J7K23q5k89K26N3N3O1k48Q1Q1rj0j44L71k72k72J01J02J86j24j04
-1483A554j05J86J85jl11Q6Q6J05k05q5K23L0L0n0n1n0n1N0M9j56J52J33l82J1L20K4K4J59
-1485A960l57J10k00K51n9J06k05M8M7k22Q8O8k41L16Oj67j67lN13l13lJ26J25j14j13J01
-1487A701J01K4K4k13k12M65m63J26J26rrPPPPl0l0J06J05j5l24L98j18L0L1J7k91k3k3L19
-1489A841Rl09K06k97J3K26q4L16k00m73O61l38k9J31J32j78J32j2j2n1n0j86J23K84k31l42
-1491A282L79n9n9J05J04n0n1J4J5L3L3k92J7J00J01NNJ41l75J48J48k52K63j05j05m8M69
-1493A966n27M02j20j20J42l73K45o4k4k5L3L3J6J5J6J5J44J44m23j14M06j11j62j62K54K55
-1495A861l96J19l8l8J48J48r6r6L29l93j28J81n8K52l9l8j93J17O3O3p2p2o9o9M15l07L7
-1497A631L8Q9Q9l16qK51n9RRq7q8P0O9N7k52L73j43J28l88J59l56J54j57J99J98k7K82l60
-1499A564L63l98q8M90k32q4q4K35p4L5k74J38M48k81k81j16M00M5k65j12J96L5L6j90L26
-1501A832k92J7K13K13j28j28o5o6K63m6j75j75L59N1k80K9j0rj3j3j3j3J37J37k05k04N6
-1503A472L66l57J60K9K9r4r3M5M5r7K12l06K09P4P4K6k84O4O4j66J43l1K79l95q6J01J01
-1505A584J63j47j8j9K95m28K69k47M0M0M14l07j8j8J11J11k44O5M6M6j42j41K71l8N9k50
-1507A497QL16k00J09k39K76j43J67l04NJ16J17j22j22J03J04J56j54k86K30K10l05l7l6J19
-1509A585J18j75L41m26R0L72j43O4k47K47k68J76j33J48J49j28j28PPn1n1N14m14m7m7J01
-1511A661J02p3K37j48j49opK64k51j55J55O8k40L97j18n7n7K01l14Q5Q6l85L37J65l51K74
-1513A721k41P5P4l4l5Q6Q6o8o9j11j11N66l62P8P7k5k5j64L51r3r3KKj72J37K6K6j48J61
-1515A717R7k12%%j14J95JKM5k64J62j48J26J26L6m80K55K55l05K10j10J99j74J35j61J48
-1517A741k01L16l80p1K00j10K74l5l5l6k8k9J90j19K33k81J43j66J88j22j41J69k5k5onL3
-1519A672L3JJJ46l70K49o0j2j1p6p6L85l37K04l11O8O7M03n25J17J17j7j8LLJ78j32k8k7
-1522A647m6m7j5j4K56k59R8k11K60n0J8J7kkp4p5K55m68K30K30n3n4j93J15m5K64k87K28
-1524A723m2m3N3N3k5k5j14j14M1M1J42J42j48m57K42K43k54K62J16l98J10J10k23K93j6j7
-1526A695R8k12J18J17j59j59R3k17J07J07L07lm31K91m05L16J46j64m1m1J85j23k8k7J41
-1528A711J40r8r8J4L22m96K26j67J42%l09L50j66n0n0J06J06j13J97l71J44L19j97L8L8j03
-1530A635j04K87k28j32J78K47o3j07j08j32J77j26J84k13N09n73J48J28l88N08k14J03J02
-1531A818l49L72p1p2m5m6J22j88L93l29Q0Q0J6J5p9l89M37q0l1l1K08j02j81J28J29j81j51
-1533A473J58K55k60J4J5j7j7K9L0l00M23j50j49K05j04K86k3j25j26O7O8Q6k22O8O8k79K9
-1535A502L3L3N2N2o4o4q3K26QRl0l1j11J98k47K68k29Q0O1O1J97l18m7m7K78l1l02K13j5
-1538A652j6j18j19P5L84j83j83J36l79K91K91k13R6k0k0K03j07J19j91l21J94K14r6m5m5
-1540A599q4q3L12Mk36P5OL15l87J29L6L7l05M17l24J92M3M4p1K38k13k13K75l5j5j6J7J7
-1542A774l51J66K4K5jjq3K27j03j02O2O2k67M55k49k49M28k95J99l17J02J02p0K39PPl08
-1544A483KJ88J88j84j84P4P4qqJ47j63J10k00J10J10L7L6l30J85JKj60L56k06J03l8l9k7
-1546A659k7l10M11R0m26L3L2K77k39Q4Q3k20K96k7k6J28l88P6N92l33l34O0N9K8K7QQJ26
-1548A747j83K61k54J04k06R1R1lkklK7K7Q4Q5m58M70n3n2l3l3k20k20M10j06j44J65o1o1
-1550A468K88k2m7m7Q8Q9q7q7k16R3L38j77k3k2J6J6R3R3k38k39J42J42p0K40o9p0j08K00
-1552A784L9m76K99j1k3k3JJk11L04n8n9P7L87l71o2P3P3k84K31l48J67J04J04l8l7J17j92
-1554A568l8l7K78l0r6r5j1K98m37K85qqj37J73J8J8j37J72j16j16L9L9K56n3l4l3m4m3j60
-1557A511J50J17j94M06l15j6j6m2m2l8K70p7p7J60j49j49J61L0L0m8m7K79l0l0l0ol16J88
-1559A680j22JJp0K40J23l92KL10O2O2k48O2j10j11K38p2j9k0j16J93j95J14j95L20M1k68
-1561A511P3P3J89j20Q6m30J86J85k0k1J42j68J04J03k37P3j21j20K11r8P6P6K5K6P0k39J8
-1563A653J7r9r8J47j61L80j36r1r0j17J93M0M0j8j8JJk11L04j79j78J05J05jL08j17j17k15
-1565A448L01l4l4k71K44m5m5O6O7n6n6L44l79J70j40K24k93K82k8j36j37j16J92k08L07r
-1567A658rk15L01k21k22J79J80j05j04P5P4n4n4L3L3N2N3j54J56j9j8N6N7k1k1M5M5R1k19
-1569A652p6p7J5J4J19j91K74k42L9M0n8K52k36K79j00j01k2K87q6q6k46K70j62J47l22J94
-1571A577j23J88K2K3O2O1k26Q3J35J35m98K23kkM8M9k03J07j38j39J13J13k7k8K23q6n4n3
-1573A583K30q0j88j88K50o0l3l4J60J60K7k81J76J76j52j51n4n5K38k78K05j04j28J82R7
-1575A698R8Nl04J41j68L09k07J60j49o1o1L38j77M1M0o9o9MLK61k54K82k33K4K4m9m9J25
-1577A703j85N1N1m6K63j72J37o2o3k26K88j11j10L12k03J83j26J6J6mlq7q7K03l12J05J05
-1579A636R2R2l21j1J70j40M8M9l19M03K8k81L05k11J14J13Ml05K05j04L09k07J44l71N37
-1581A979l91J0J1K61k54j16J94p7K33k92K23j5j5j64L50l51m3kL06n4l64K68m2m1m2N4N3
-1583A679P3k37L9L9K39p1m27K94K05l11J48l68M70k51rL01l82J34K20q9nnk65K50m0m0J07
-1586A698J07l76L45j93j92R1R1J11j99K0K0J91l25L71l51R3R2O7O6j89J19J20j89P1P2P1
-1588A802k38K9K9l6l5J19o03M41J32r4r4K93m29K21K20j02j02J13j96K29q0L6L6l12M09q5
-1589A703q6J01k08K36k79m1m0L17j97K08j01oL03k38P1K6k83L42L3j83j84L26j90J72j37
-1591A665j5j5J24j86K79k38J3J3k0j9NMJ60J59l2l2j29j29K22q7RJ0j44j44R4R4N1k58J47
-1594A601j62K68m2L6L5q8q9p5K33k36K79j72L43k32K84l80L42r9r9l63J52J53j57J7J7K85
-1596A851k31M0M1J65j43O2O3k19K97m05r6jL08K18r1m02L20n17M10l15K01n1K59n5n6o8o8
-1598A517j57N65K3K4k74L6j26J84l12K03J07k03K1K2K2K1j17J92j55J53j38j39L13Lp8p9
-1600A628N6N7k6k6n9n8k60M62j18j17J88j21N3N2m7m7O9L79n39k3L25l96M02l19j32J77M7
-1602A607M8M7M8P3k35K1L32j87j87N8N8K90k25r0r0J90J90l58J58j33j32P4P4k0K89m65K57
-1604A692O4k46o6K44O5k44J03J03n1n1K6K6q2q2K02j08k94K21M7M7J66j44N0k60Q2Q2R4R5
-1606A781l10K06q4q4J42J41j87J22j92j92J69J69M0k70L82P2m88K35j8j7j81J27L79l42j2
-1608A588K97k70L9M9k60J07J07p7K32r6r6J9K0j55J55o6o6K24k91K45o5J74j35o2o2P3P3
-1610A701O9O8k15R4l14M07k89K27O4k45Q3Q4J88l26K34p6o5K44k08k07M5M6l2l1N8N9l8l8
-1612A587J49j61J4J3O7O7q8q8R1R2m3m4k46O3M3M4K5K5M5M5j80J31m4m4JJr6K14j0j0K8k81
-1614A410J25J24J25j85L2L3R0R1j61j61J49j61J95j14M1M0k9k9J45j65Q9Q8l94L27j25J86
-1616A766r9r8P4P4k73L5L41L2j62J48m05L17j66j66K91j7p0o9k00L16K6K6n2n1J22j87K4
-1618A577K4Q3Q2j01j01j34L82k0k1j43j43J7J6R4R4L4L5k75K40J05k05J76j34J0Rq7q7r8
-1621A429r8L14k01L15j99P7P7m0K68m08L14m06N21k13k13PPp1p0K56K57j88j88r6K14j15
-1623A550J95j44J66j64J47K0K0k70K46R1k19m4m4K48k67M1M2j25J83j64J45m2m2J52j58j8
-1625A545j8K15r5P8P9O0k50J98j11j24L92m72K49j43j43J77j32K16r4J7J7J8J7j57J52J53
-1627A844j57M4M3j17J92m25R0L68j48p0o9QQj01M14l08Ko2o2N5N4o3K46q3q2j85j84P3L83
-1629A708J36l79L3L42j46J63m55K66l2K78k83K6n3n2K56k59P6P7m59M69j25J83k48k48N69
-1631A843l59K40o9J67j41N2k58N5L65k61M9j8j7p5p6J57J56q2q1j69J41p8p9r1M25j04j04
-1633A588r6K13l8l8J4J3o3o4K7K8J69j40J78l39J07J06j83J27j64L52k50O1j47L70K32k84
-1635A779k14R7o4o3K46k69L6L6j89J20K66m3K9K8k68K47k93J5qrL01k15R8R8k05L10l03O
-1637A569J92j16K7K7Q6k24J66j44o6o6N8N8n9M58k60N0O3k47J57j52j72J38QRK8K8k6k6k6
-1639A538k6O4O4O5O4n1n0p0p0K25q4j4l23K65m5L2L3J9K0n8n8KJJ75j34l5l6K35k81P5P4
-1641A616J71j39L78l45J0J0K27k88K2K1j65J44j1j1j57J51k2k2QQK98k17l0l0mlP8k31R7
-1644A564R8m8m9J45j64l7K73j53J56p3K37k28Q2k61M8M8M8N1N1K05l10r7K12ONj5j6l05K10
-1646A683L6L6j57j58j20L95k24Q5J38J37l72J43mL04l84J30M7M7k49N9M0M0P8k31J70J70
-1648A839j39j39J62l53L04k11J80J80j10j10r5r6P9P8j79J30L17Ql39J77j0j0K44k71j3j4
-1650A609K03l14J51J51k38P2K45k70J73j37NNQ1Q1l51m2R7R6L48l74J16j94K13K12l89q0
-1652A469K81k9o6o5J28l88J67J67j55j54L62j54j8j8N0N0O9O9j65J45M8k62K05j04j23j24
-1654A385K29q0P5P5J62j48j27J81k34P5R4R5j59J51k16R3Rl01K54K54o2o2O7k42L84l37K23
-1656A838q6m1m1j4j5J40l76K43o7O6O6o2o3K61k55J78j32K55k61rrJ08k01J67j43p6K34K53
-1658A958k63r1r2L1L0K6K6K19k96J13j97M2M2j17J92j75J34K36p3l5l5O2O3J01k08j66J43
-1660A670Jl08M48k73J90J91k16k15M2M2L6L6L5L6q2q1nl14L66N5p9p9L79j35j%MNk54K62
-1662A756k56K59k44K72m47K74r9r9J72J71l44J72j34L82j53j53J77j32K3K2K16r4j52J57
-1664A746k87K2K99j0j26j26K03l13L11KQQk36P4Q6Q6k90K25o5o5r6r5L49j67M0M0M6k63n9
-1666A347K51j16J93ppl2l3M19l03j74j74K23q7K80k9j29J79k07J02Ol04J48J47L2L1j43j42
-1668A471K34p5n5K54l52m2O0O1J6J6L5L5j01K08j20j21J26J26j31j32O8O9k99K17K7K6l7
-1671A584l8K35p5k3k2k25K92J17l98J54j55J09J09J54l61Q3Q3J11J11k50k49J57J58Q1Q0
-1672A822j58j58K87k29M8M9j78L39k40O9J01k08J12J11m4m3j52J58J00k09j18J92k1k1J79
-1674A788j30O2O3k25Q4r1r0J24J23J4J4K1m93K60K60p6p7R8k12K2K2Q0Q0j29j28J81j29L26
-1676A842J7k73K42j08j07J57j53J36j74J36J36j67j67q3K26n5n4J20J19l8l8k12R7Q7Q8k22
-1678A552Q7l6l6lL05l63J53m1m1k8k8K43k73J67j42k0K89q0q1J13j96J11J11L4L4l43l4K24
-1681A678q5N8N8L9L9r9r9Q8Q8l33J83Q0Q0l08K07k4k5J53j57k01J07L94l29r6M19k43O6j79
-1683A559L37l37J77o7K43l41J74j28j28L29j86J23j86J4J4J68j41P1P1l93J22P4P4m8m8J53
-1685A700J54j4l23k9K81j96J14K61k55l32L89p9K31l31k1J75J75k38P2n3n4l5l4opj41L74
-1687A778k6k5Ol02K36p3Q2Q1m9m8o9K42j35j35J35j74L8L7j36j37J85J84j05j05L72j44j83
-1689A530J27p9p9R5R5LLp4p4J0J1J1J0J27J27j64j63L10k05QPL2L1L2L2j68j67K78k38J97
-1691A665J97j64J46j84j85RRj28J81Q5Q5p4p5O03l26r8r8kkJ0RL96n31o8K42K15r3k75K41
-1693A790k43O7j%J8J9J03J03j55j54J08J08kkJ33l83L52j64l1l2j41J68j01K08j02j01jk
-1695A562J15j95k4K85l7l47M41k80j46N77j89j90M9k60j3K97n1n1J63J62k89K1Jl08L49j66
-1697A476L1L41j43j42J86j23J66j42M42m85N0M9m40P5J98j12K94j6K3k86L72j42qqk30P9
-1699A505l7l7L15NR5k14j9j9L61n67L84l39O8O8J70j39j40J70L9M0k70L9O4O3J22j88q8K22
-1702A673j59j59L10k06Q4Q4J3J3J3J4j02j02K47o3j65J45K9K9n9n9J16J15j94J15l88L35
-1704A679r8r7J02J02o6o7K62m8k0j9p2p1K15l00J45J45r8r8L7L8J24j85j1j0P3P3q1q2R6
-1706A668R6n9n8j55j54L81P1o6o5m0m0J96l20J25J25k3k4RRl04K12jjQ4Q4J04k06m5m6J09
-1708A666J09j95J13m0m1j64J46M9M9k5k5j80L36K6k83j9j9J67j43L1L1k8k8k7k8R1R2j15
-1710A546J95P8m37K97k18K18r1j4K96l30J85K05l11p1p1N2N1j0j1l0k9K24q5k00L15k6k6
-1712A702J80j29n6n7K14l01M5M5o4o5J45J45m16L06nnJ56j53j67J41J03J03o8o7l6l6k80
-1714A380K35J19j90J04J03k25Q5j36J73m07L14J70j40J76j34N5N5k73L6j01K09Q6Q7k84K31
-1716A728p8p8J61j50M5M4k07J02J02k07R4R4P5P5n7n8n7n7m4m4J11J11k08k08M50J40k60
-1718A619N0M3M3k53K63m7K62j83j82rrO9O8q6q6J70J70l45l6o5K44m6m6j45J64j0rO9O9O9
-1721A815O9j10j09l3l2nnk5K85k46k47J33J33l0l1l1l1R8R9k3k4k17K98RQj48j48K00j10
-1723A542j06K03K9K9r8K12l68L53q1q1l7l6Q9R0o6o5J18J19J5k94J47j62J47J47l1l2j09
-1725A674j08Q3Q2l42J73j02K07Q4k24K1K2LKK3K4J00J01j72j71j7j7M3M3K4L32j66j67J11
-1727A666J10P8P9l35k4k4K87k49k49L09jN1N1k98K17n4n4j15J95K0K0q0q1L05m16L26J5k03
-1729A546J06J79j31r2r2J27J27k02J08J5J5j52j52J92l23J41J41q3K26j03K07l19rL84j32
-1731A724n3n3Q8Q9k14R5k14L01j21j21k56M65R8k11J62j47J31j78J18j91L16j99j03j03L38
-1733A761K8k63M60l67n7P1P2n4n3K17k99J00k10J06J06j47J61k25K91j56j56L21j94J99J99
-1735A911j94j95L0L0K43k74RRJ51j59mmP3P4n3K57l63J54oon1K58k62M7l0l1n6n6Q0P9J55
-1737A816j54L9k70R7R7J10J11k92K25k1k0l33L89l07K08rqJ40l76K96j3k7k6M1M1o9o9J10
-1739A726m06J23J23J16j94J54j55J00R9j26J83K24k91k41K76j82L33j82j82Q3Q2p2p3J38
-1741A656J37m43P3L15k00J22J23K0K1K1k89K13r6j73J35j98J12m3m3K1K2K1K1NOK95k20r9
-1743A535r9M63n4l79L43r5r6N0M9j25J85q2q1mmK20r0p1p1J24J25l1l0r0q9oL03j84j85K47
-1746A778o2J40j70k27K88q7q7J00R9j23j23K06j04N1N1j23j23J60J59j49J60j47J63l52m3
-1748A435K70k45L22j93K75k40J8J7ppj04j04K19q9J04k06P4P4j19J90p1p1J03J03j11j11
-1749A526J1J2K38k77j03M13j97J13j45J65r8m08N33j88J50j60l1l1qqJ66j44M2M1j71J39
-1751A580J15j93L2L2j02M14k57k56K51n9L8L9O8O9q7q6K0K0p6p7K13r7R6R7j02K08k76L4
-1754A658n9K51j62j62L9L8J73l42P9P9O6k44J85J85m14J02K94k20J01J01o7o8o8o8P2P2J4
-1756A635J4p8K31j43j42M74k47MMq2q3R1k18J48J48k6k6K3K2j32j32J31J31k81K34k78K38
-1758A660m0m0K26q5k38P0K7K7r5K13k97K18k66K50Q5Q4j80J29k27K89l10jO6O7P3k37L38
-1760A806j78R3R3p4p3r9K11n51N83J01m16M2M3q7K23q5q5N7N7J69l48K91j9k07J03O3O4j24
-1762A653j23J86j23N2k57J55J55q1q1N3N4J06k04M8M8N7N8J22j88J69l47L11m11K93j6k94
-1764A395M29p0p0k5k5N2N2k76L3O6O5q9q9K88k1J7J8j81J28m5m5L8L8L9L8j36j35J93j16
-1766A566J01J01p3p3j7j7Q0Q0j67J42k05J04onnoJ69j41j40J68K2K1RRK44k72j55J53Q5Q4
-1768A856k44O5Q0k30K15r4o8o8O7O8n2n2K96k19J48j62j%j62J48L02m20J10J09r1r0M0M0
-1771A591P2P2l24J92K4K5J29l87K32p7Q7Q8J0J0j53J57j27j27K97k19k6K83j96j97L71j45
-1773A662j24j23K76l4J7J6j12j13K43k74J91j19J32J33l12K03j66J44R8k11J80J81k38P0
-1774A720k58K57j4j3KKK2K2k13R6N1k58M39k82PQJ98j11k46O3p4K36Q1k29R3k17K28K28k83
-1777A555K33j34j35j9j9K51k64K66m4n6n7J48J47l81J35j72J38mL06k40O9n3n3p2M43k27
-1779A761k27K00j10J10J09l54L67l29J87NNj18j17N9O0M0M0R9k11J37j72qqJ14j95L27j90
-1781A581K17k98K6K7K13r5l58L64m3m2j64J44K61k55K7K7nnQ2Q2p3p3poppr7r7J61J61k3
-1783A718k4k3k3j7j7LKk48O0K16r4O0O1j33J77MMj31j32J04J04j54L62l46J69N4k56K38k79
-1785A459J48j63L36K6j80j80J39J39j18j19J46J47k66K49l37J78J08J08l88J28qpN3N4N4
-1787A706k56K00j10M5M5J6J6J6J6m2m2m2m2J26J25l00K16k61M8O1O2M1M2O1k48R4R4R5k16
-1789A566klklj16J93j55J55M2M1k87K3K07j01R1R2q9q9Q5Q6k19R2R1k18J68J69j09j08N2
-1792A652N1j41J68J6k93J90J90m21R4J13j96J84j26K04j06O7O7j27J83ONj49j49K19r2j87
-1794A422L28k30Q0j65L50l52J64R3R3l03K12N8m58J34J34J01J02L1L0j43J66j02j02j03K08
-1795A748o4o3k5k5m0K70k33P7Q6Q6k24Q7j20j19L12k03K37k79k1k1O7O7J64j45p5p5Q1Q0
-1798A630j12J98j56L59l25J90j13j13L64l57M9M8q0q0P4P5J15J16j42j41QQPQM9M8m8m8M5
-1800A676k64L54j61P3P3k10R8KLl7l7j01K07KJK23k94J71j39LLj6j6l6l5j6j7o7K41j06K03
-1802A781j22j23K26q4j9j9l8l8J4J5J5J5o5o5L22j93o4K46M0k69K69m0k13R5k1k0J8J8j42
-1804A539J67ppqrQ8Q8l04NJ8L28j96j97q6M29k16R4q1q0K20k96J48J49j86j86N3N3P5k34
-1807A361K68m0j%l9l9J74j35L8L9M8M8j07j06J69J69q9q9r7r7L86l36rqL0L39k03k03K81
-1809A752k9j82L34j50j49J12j96N5N4O3O3L1L0J28l89J60J59k11k11J50J50q1q2n5K53l42
-1811A417L79J2J3k73L7L7L7k33P6J78J79k28Q1r3r3K2K1K2L31k43O7j0j0j07j07J44j65P4
-1813A565P5k03L12k23K91L4k75J45j65j0L00j94J16n8n9K08j01j14j15L21j95m0m0j94J15
-1815A496O4O4K76k39N1N1m6m7m6m6M6M6l1l2J03J02L8k71j02K08L3L3k68M1K15r5j86J23
-1817A581J49j60K54k60M2M2j46L69l98J18K04l12J85J84j83J27r3r2L52l70L6L7k8k9J46
-1819A755j63N2N2L3L3n6n6J19j91P5P6k92K24j05K04r2r2kkr9K11j7j7k9l0K72k44M6M7l5
-1821A677l4l5l4N6N7j18j18J72j37J92J92q2q1k56N4M1M1O0O1r0q9O5O5l2l1j2j2r0K21O5
-1823A768k44m5m6K96j3l02K14JJj07K03j26J83l13lJ71j39J38J39m42K81m6m6jjQ1Q2j6j5
-1826A653Q1k27J01J01k2k1P5k34J38J38j39j39noM01l21P4P5j64J45J26j83J64l51l2K78
-1828A706P1k39J11j98L24j91k2k1K37k79L5L5L5L5k48K68k2k3rj0m2m1L09k05Q4Q4j8j9j93
-1830A554J17LLj84J26K13l03OOR9R9n6n6K1K1K1K2q6q7J01J01k19K98j48j47P5P5J13j95
-1832A593j38J71J53j57j1j0J24j84J41j68j4j4K17K17j43j44K4K3j50J59r9r9P5P4p0p0Q4
-1834A584Q5r0r0K39p1r5r4M0M1K3K4l05M17n6n5J45J44k03k02J96j12J81l35J9L29l8l9j9
-1836A663j9llllK8K7j66J44P3k37K47k69Q9R0j17J93j11j10J99J99m29Q7k35K80m5m5J42
-1838A666j68K51o0J15j94P0O9j04j04jjk1k0K86k4O6k42p2p2n2K57L09m13J54j56K72k45
-1840A566M6M5p3K36p4p4j43J66k7k7J85j23L0L1K6k84K38p1k74L5O8O7L64j53j20j20J9J8
-1843A577L8L8k30P9K34p5J2J1k7k7J54j55L7L8j94J15n9n9ppK51k65J26l91N31j90N6N7q
-1845A660pJ82j27l7l46J80J79j4j3M7k62L76j39j28J83k5k4j4j5j4j5%jj55J55j46J64j0
-1847A634j0R1k18q2K27J23j85j67J43J34J34k60N0j14J95j34J76m6m6k7k7m6m6m6K63k36
-1849A480P3M1M0K44k71J8J8o8o9Q6Q6o2o3K09l07K78l0k38P3J20j88MNP6P5k14L01q2q3J44
-1851A696j66q8K22j26j26O0O1O1O1P3P4o2o2j87J22n2n2L3L3J88j21J11j99m4m4R8R8j47
-1853A515L69l56L65j62j63N9N9j34J76P5k33o0o0J73j36K12r8%jJ34j74J58j50MML9M0L9
-1855A694M0K5K5j30j30O7O7q7K21j74J36j93J16l9l8l9l9J33j76M3M3l46L77M7M8K7K8j47
-1858A599j46K01j08J44J43j46j47j2j1K54n5j58j58K67m2lmj11J98J01k08K33p6n7n6j68
-1860A474J41l3l2J6J5J6J6n7n7K1K0j20j19L24j90P5P5j31J78LMj51J58L7L7r8K11j68J41
-1862A806r2r1P8P8k31P8j83J26k9k8L8L7Q3Q3J56l59J05J05k27Q3NNj64J45K61k54l7l7J89
-1864A729l27L08k08Q1Q2k35K80j0j0n6n5K3K2N6N6N6k53P3k35o8K41k41K75J14J14l58J56
-1866A610Rl01L76j40P3P3j00K10j19j19N6N7j18J92j94j94K56n2Q6Q6l40L83o2o2j7j7L6
-1868A668L7m2m1K0J9j35j36P9P9R9k12O6O6M7M6j47j46K85k5OOj68J41j57J52R5k15J23J24
-1870A734k25Q4P0P1k40P0M1M2P9k29J13J14k8k9k76K38K6K6l3l4l4l3N2N3N2N3q9r0R8R8
-1873A774l33J83LKL25l97RQJ9J8J8J8J8J8j23J86k87K29J32j76j11j11J08J08Q6k23M7M8
-1875A596j16J94j73J36R7k13j74J36J3L23j10j09R6k13J34J35j62J48J9J8l46L75k24Q6J05
-1877A771k05J24J24q6l96J40J39j5j6j89J20%jJ93j16j%J21j87K98k17N4N3M4M4j11j11N6
-1879A630N7k34K82L0L1k28K89k47k47L13k01J26j82K55n3K20k95K66k50K7K7J49j60Q1k29
-1881A457r4K15k6k6opnnJ70j40M3M4K4K4R9R9l46J70l4l3jjl2l2l2l2N9N8L9L9J37j73JK
-1883A655JJJJpqJ2J1j62J47J47j62j1j2J44j66l7l7R8R8j46j46K15K15j53j52J05J05j28
-1886A629j28L17j99K4K3k99K17r4r5L82j33m6m6r8r8K53n7R8R8O6k43J04k05K9K9l6l6M58
-1888A914k65j3j3RQJ83j27ppk01J08k9k8j0j0M6M5M5M5j24j24J33J33n0n0J24j86L5L5j58
-1890A461J51Q3Q3k26Q4j0j0j84J26J55j55J9K0J43j66QQn0n0Q5Q6R9k09J19J19n1n2n2n1
-1892A583L9M0P8k32j05K03rqJ74j34L9L9rrrqj25j24K05j05O6O6j46J63O1k48K36k80J07
-1894A548J07q1q0J14J14k34P6K25q4N1N1k56N4L4L4r1r1J60j50R6R6j10j10L44j72M1M2J1
-1897A739J1j25j24j28J82Q5Q5kkJ7k93J07J07J1J0l9m0J54j55j03K08j41J68j43J67J2J3
-1899A781n9n9n8n9K6K6J99j09o8o7K03l12J36J36k25Q4N1N1qpr4r3K16r4O3k47L40L0k1k2
-1901A740m1m1J4J3J4J4n1n0J24j86Q5Q5k63M6R7R7k13R7L4L4k4k4l1l0J23J24j10j09j10
-1903A458J99q6K23q6q7J04J04l28j9L2L1Q3Q3k98K18Q3k26J38j71J38J38m3m2m2m3J01J01
-1905A763J01k08J09k00N1N1n4K56m60K62j58J51K2K2p6p7M7M6N6m60N84O9j38j38MMj01K08
-1907A736k36P3J08k01L99l24O5O5M0k71J68J68l9l48J42J42j29J81k2k1q0q0R5R4k15R5o1
-1909A544K49k35P5ppl4l3M05l16J86j24r6r6K14r6J0J0rrJ6J7J7J6j01j02J57J56j24j24
-1912A559J02J02J3n02K97K98m76K45O5O6P1m45J04J03Q8Q7j70j71M9M9L0K9J10j99J29J30
-1914A763j30j30J99j11K0K0p7p7Q7Q7o9o8M8M8k9l0Q7Q7o7o8L9L8q3q4L60l62j29J79L6L7
-1916A621N5N6M1M1j13j14j7j7J38j72J96j13K92m29J37J36j41J69k32P8p6K32k51N9N9N8
-1918A693l8l9K0J9M4k66J66J66r9j00N5N6m5m4o4o4L01rj44J66k47O2r2K17j86J23%%k22
-1920A429K94j70J39m1m1j95J14P1P0q4q4J37j73P9P9p2p1Q4Q3O4O3j23j24J86l29K89k1J5
-1922A668J5j59j60J20J19n4n5J45j64O8O7R2k17m4K66j27J82j46j47J26j84J77J78l16K00
-1924A650j2j3ooR0k18J46J47j31j31Q2Q3j70J40r5r5N9N9J08k02J66j44j50J58M3M3rrJ46
-1926A729J46n7n7j54j54K38p2K5K5k6k6j23J86o8o8K61k55j15J94l2l1J43j67j2j2J56j54
-1928A520J95j15JJj8j8k0k1J22j88K84k31J36j73J71J71j06j06L7L7k33K82j43J67l23j4
-1930A415K45o4j02K07j60J50mnjkn9o0KL10k76L4j17J93L8k71J51j59k3K86p7p6J62j48J98
-1933A787l18J08J08o5o5n2K58l95J21L15k02j06K03j58J52k05J05K7K8m9m8M8M8p9K29k47
-1935A548O2k7k7J2J2q0K29j25j25J5J4K09j01j30J80j68J41j16J93k33K84j75J36pol4l4
-1937A647J20j88P9k31J05J04q5q6J79J79L6k73q0q0l0K80p5p5j7j7J32J32k01J09j61J48
-1939A651N1N2j09j09J27J28N0k59K10j00N5N5j98j98J38J37q6q6M3M3J1J1J1J1j8j9j8j8
-1941A566P4P3n5n5j9j8J55j54J03J04j86J23k79K37l3l4k5k6j22J87p6p6N3N3O7k42K35p5
-1943A555MLj6j6J86J85j50j50k6k6N2N1m1m0m1m1J29J28k72K45j14J96p5p5k9k9k9k9J7J8
-1945A570R4R5j11j12M9M9j92L23j47j47R1R1noJ54j55p8p8J66j44K9L0K6K5K5K5m9m9m9m8
-1947A472Q8Q8m1m1L3L3L3L3n4n4n5n4J21J21O3k47K9K9J20J19l86J30P3P2o5o5J28j80p2
-1950A471K37l3l3QRo9o8L9L9N9N8r2K16k60M9n3n3J40j69J9K0J93l22K80l0j7j7j28j27K26
-1952A592q3L4L3nnJ34j76J52j56K34p4m9m9j6j5J40j70K08j02j21J89m4m3k4k4k2k1m1m1
-1954A435J89j22P2P3j04K05j24j23J43J42j15j16O6O6j2j2j05j05J71J72k17R3K7K8k70K45
-1956A702k19R1k5k6J49j61L16Pk5l35J72J72j05j06l7l8j53L62j96J14k02J08N4N4o1o2j92
-1958A358J17K27q2j69L46k73L7r0K19j3j4l4l4l4l4Q8Q7o7o7J9K0L9L9r5K14l47L75k50N9
-1960A641p0o9J8J9M06l16J54j55J48j62K6K7POk2k2j96J13O9O9o6o6K0K1K1K1k9k8J46j64
-1963A567K9L0J84j25NNj5j5k11k11K53K53k2k1k2k1J22J22l03K12j54J56o4o4j36j36J41
-1965A559J42k02J08o6o6J05J05k24Q6N2N3q3q3J01J00p3p3J73j37P0P0k83K32l8l8k00J09
-1967A499j62J47R1R1J30j79p8p8P6P7n9K51k52N7J02J01l24J92m7m6J20J21n5l65J71J70
-1969A751j71j71K09K09k64M5K20r0k42O8J0J0J67j42N1N2k32P7R6k13RL19j14j13n1K59j86
-1971A563J24J6k93N5N5N0N0N0N1K8K9j26j26J01J01k28Q2L2L3k00J09O6O6o9o9m1m0J33J34
-1973A736j76J34J33j76ppn8n9J93l23J54J54l14K01O6O6m4m4m3m4J6J6J6J5L9L8j35j36K15
-1975A626r4Q0P9j8j9r6r6J96J96j65j66l9m0N8N7j93J16J16J17j24J86j63j62J98j12O2O3
-1977A663j21j22J88j21K27q3R1k18O1O1o8o9L78j39j38j38K87k28LMk0K89j61j62J82j28
-1979A518O5O6j79J30j80L36j37j37M9M9n1n1J03J03r0r0M6M5Q7k22J26J26j56J53j30j31
-1981A448K42k74K8L38l27J88J4J5j67J43M7M6j06j07k9l0M6M6M6M6N2N3j03j02o1o1J7J6
-1983A464N6N5llJ2L21m01J15j5j6j57J52J0J1lkK49k66K3K4mlk93K23N8N8m5m5j45J65j0
-1986A585rQQJ05k05J55J55j41j42J73j37L7L7L8L7j17J92j89J21l23J92llK9K9l5l5l5l5
-1988A492N2N2Q4Q4k63K54j14j15O3O2o1o0r0M26l27J87J38j72m3m4rrrj0L5L4L4L5n6n6p5
-1990A519p6K04j05Q8Q8j35J75j86j86K43k72N21m07K24q5N0N0k74L5J19J18m5m6m6m5J1J0
-1992A547J1J1J1J1J1J0J8J7j57J53O6O5j8l27J87j21L3L3lkk2k2K08j02P3P2r8r8N6N7l1
-1995A649l0l0l0o8o9J18J18k29K87mlq3q2JL11j06j07j64J45j61J48pol8l8K0K0J28j81J67
-1997A676J66k09J00k48O2L9L9K32p7o8o8Q6k23J6J5J51J51j60j59M00l20q9q9J94j14%%J69
-1999A672J68m09J07P4P5K8K9k43K74k39P0l9m0k01L14j81J27K42k74N5N5k04J04K8K7j03
-2001A516K06N2k58J8J7jkLMJ00k10J41J41k07J03R1R1l35J82n9o0k6k7K00K00l35k5M8M8
-2003A616rj0M6M7j28J82j78j79R9R8KKj7j8J22j87l2K77j10j09K38p1pqk6k7pqj62J48p8
-2006A506K32p8p7n3n4J01J02m7m7L0L1K5K6K5K6k9k8rl19R4R4P4P5j16j15L30j86lkl5l4
-2008A539K9K9J0RJ20j90m9m8K85k31N8N9QPPQJ3J4j28J81k73K43j83J26j29J80j49j48K22
-2010A619q8Q7Q7onj79J30noJ5J4m0m0m0m0jjjkM2M2O2O1k64M6J54J55j61j60J61j48r3K16
-2013A611j52J59l1l0J43j65J87j23N2N2k04J04j65J43P6P6j37j36O9O9j05K04j9j9j81j81
-2015A297K73K72k36P3p6p5M0M1k18R2K21q8m5m5J88j23N4N4L4L5l3l3r2r1o1K49q0K29k11
-2017A645R9j85j85J55J55ook26Q2Q9Q9m8m8m8m8N2N2j22J88r0q9J81j28L0L0J0J0n8n9Q9
-2019A610Q9j62J47m6m6J91j19k3k2j3j2J93j15l12K05K62k53M5M5J10k00L2L2m5m6r8K11
-2021A660J7J8pl15J42J41J7J6j58J51%jn9n9K4K3M3M3j65J45J44j64o5o5R6R7q4q4J3J3K01
-2024A778l14J50j59J87J87j67j67NOQ2Q3n8n7R1R1k28Q2MMj48J62j08K00q3q3N9N9l33L90
-2026A715M8k61o2K48k30Q1j3K97k44O5k05J06O0O0k60K57n4n3K40o9k69M0J76j34N9N9j6
-2028A641j7k29K87p7p6L3L3k2k2J85n37L27J9J8J9l0l0mL05k78L2N8N7K0K1j09j08L9L9L9
-2030A633L9r2r2L7L8R3R4q7q7Q6Q6p6p5j62J47OOk38K78QPj32J77MLo9o9QQP1P0k58N2J14
-2033A628J14j44j43J99j11O3O4j32j31k9K81j66J44k05L11k87K2L6L5qqJ66j44K9K9o8o8
-2035A477J09J09j49j48J31J32j78J31j26J83m9m9O7O7j84J25j7j8KKllllJ2J2J1J2k1k1l10
-2037A300K05L3L3O6O6j02j02L3L3P3k37P3P3J41j69J79j30p1p1R6R7k32K84k6k6R7k12J36
-2039A640J35j64J46k22Q7J52j58L6L5j14j14K33p5j60J49j21j21K14K14j47j47N7N6k1k0
-2041A570N3N3n6n6J75l40J04J04NNp3p3JJL3L3j55L60m52M76p7p8j36L80k16R3k23Q7noJ4
-2044A601J3MMj5j5J66j43N0k59O7O6J44j65N8N9l8l7l4l3K19r1o9o9L56j59j5j6k9k8j22
-2046A470J88J4J3j7j7j91J19P4P4k74K42o8o7n5K54o0o1j37J71n5n6l6K73l09JJJJ42J43
-2048A777j15j15Q3Q4p2p1%%l3l2K48k67j70J39J76j33O0O0k5k5N3N2j36j36J93j17L6L5J58
-2050A707j51K13l03J22J23j21j21nL05k76K40k24Q5J60j49j30J80j4j4ONj2j3J62j48n1n2
-2053A524O5O5M2k66K16r3Q2k28J97j12p6K33k44M78n37J84Q2Q2p3p3Q2k27K58n2p1p1K15
-2055A682r5K1K1j72J38M0M1o9o8Q6Q6l5l4l5l5J4J3L2L2j60J48k6k5j1j1l0l0J51j59L05
-2057A815k10rqm1m1qrK63k54J71j38J78j32K3K3K3K3j78J32m2m2O0O1r4K16j88J21k07J01
-2059A609J2J2N0N1j82J28k7k7j96J13J7J6L5L4j20j21J72J71q6q7O4O5r1r0N3N3k4k4J25
-2061A705J25l20J97l8l8q2q3O5O5j2j2PPk5k5K53k63K8K7k4k5k4k4L1L1L2L1j7j7j7j7P9
-2064A620Q0p5p5P0P0q5q5O5O5q9r0O2O2O2O2q5q5p2K38k32K85k38P1KKK1K1o1o2O2O1J69
-2066A816l47R8R8j2j1j2j2ppqpO3O4r1r2R5R5j63j63J15J14m1m0J03J03n1n1o2o1R4R3j0
-2069A703j0j1j0l9m0l9m0P9P9k30K85J04k04JKjjjjj1j0j1j0M1M0j33j33K28q2R3R2j18j17
-2071A495L7L6J8J7j56J53l4l3J40J40k01k01K11r8J98j12M3M3j31j32J79j31J81j27j8j8
-2073A499L45l77J25J26k65M5K00j10K9K9o8o8J08J08K3k85J6J5J51J52j32j32K3K3P6P7p9
-2075A654p8k6k5K45o4j80J29j41J68j74J35j9j9nnnnO2O2r3r3J4J3J4J3j7j8j7j8N5N5k2
-2078A595k3R2R1k57N2J35j75J9J9ONj3j4K33p6j54J56q1q1q1K29r6r5K52n6r3r3M2M2Q6Q6
-2080A752o9o9J2J3l3l3k27K90R5k13K3K2MLR0R0m5m5j93J17L9L9o7K43j90j90R8R8j53J56
-2082A657k9k9j0j0J4J5nnJ92j18r8r8NOJ99j10j20J89mmo9p0J05k05P0O9L1L0J03k07n2K58
-2085A700l8l7j8j8k9k9K42o7k62M7RQL0L0L1L0JJJKlkk2k2J14j96J33j76K08j01N3N4r2r1
-2087A491O3O4j0j0rj0q7q7J00J00k20K96NNm3m3o2o2J78j30K4K4J69j40L4L4j19j19Q1Q1
-2090A598j73N48n02K19k29Q0J07J06n2n2n2n1R4R5o1o0l1l1M6M6l5l4O2O3j32J79j70J39
-2092A717n3n3j5j5j50J60m7m7K91k24R8R8l87J29L42l81J0L19l6l6k40O9L1L0L0k79K24q6
-2094A499Q8Q8j82J27K6K7l1l1m0m1m1m1J37J36j92J17r1r0Q3Q3n7n7M0M0j97J12q1K28q3
-2096A576q3J11j99K3K4MMJ8J8J8J8J8J8j55J53j3j3K6K6j43J66qqj8j9N8N9r1r2K70m0k61
-2099A465K54q7q8K40k76J4J5P8P9j73J37K8K9q7q8j23J86L1L2j56J54m0l9N9k51J81J81j24
-2101A631j25K9L0l8l8J16J17p4p3MLM6M6j3j2j81J27m6m6R3R2J5J6j43j43J54j56K97k19
-2103A509K65k51K1K1RQj39J70mmmmmmJ1J0J0J0n3n2J40j68p1K39l1l2m6m6J28J27k41O8M8
-2105A640M9nnR2k17KLj7j7lkJ39j70K36k80J66j45L8L8K31k84n0m9P3P4M4M4O4k46J02J02
-2108A647j88J22R7k12J56j54J6J7llJ6J7J6J6pqk7k7J76j34O0O0k14R5P6P5l0l1M7M7p3p2
-2110A573K4K4j01K08k95J5K3K4M3M3j5j5j5j5Q2Q2k47O2P2P2m4m4o7K42q7q6RJ0L0K9j33
-2113A503J77j71J38LKK2K2j02j02P2k38J98J97p9q0K1K2KKJ60j49K4K5k4k4k4k4o1o1K68
-2115A719m1l7l7K1K1llj77J33L3L3j03j02K3K4MMJ86j24j23J86j7j7K2K2j17J93j35j36J45
-2117A597J45l00K16M1M2k55N5qrQ9k21J48j61J48J49p1p1OPL6L7L7L6n0n0K7K7N1N1j03j03
-2120A543LLLLN5N4J19j91J72l44K56n4m1m1J13j96J13J13j05j06L72l49L8L7J57j52K1K2
-2122A618ook6k5J49j61J4J3l7l7K53k62O6O6j08K02k95K20m9n0K1K0K1K1k1k1k2k1QPQQQ0
-2124A648Q0p5p5ppq4K25k23Q6QRm4m5j8K90l73L49j15j15J2J3J2J2p7p6L67j47O5O5o4o4
-2127A632Q0k30K2K2O2O2j5j5J1J1J1J1o5o5j03K06M2k68J84J83j32j32K2K3Q6Q7o8o9n8n9
-2129A478%jK03j06j65J45j06K02J45j64j2j1j27J81m5m5P1P0k32P7J94l23P9P9l1l1J4J3
-2131A552R1R1q5q4J66j42MLj5j5KLO6k42L20j95J86l31Q1Q0K55n5k01L15k27k27J13J14J06
-2133A729k02nnN2N3kkk1k1J41j68OOl2l3J15J16k81K8Q6Q7o6o5O4O3o8o9K98k17n4n4K36
-2136A715p4j40J69k4k4m0m0L7L7qqpqllllj1j2j1j1J2J3J3J3k3k2P4P4j39J71q1q1rrJ64
-2138A698j45M9M9j45J65n8n7L9M0MLMMo0o0O9O8l7l8J36j73l6l6LKK04j06J66j45p4p4K09
-2141A668j01j4j5l5l4J10J10n1n1o5K43l49J66L1L1o6o6j0rJ64j45Q7Q7o1o1K6K5j16J94
-2143A693k20K96k25Q3j0j0RJ0n9n9J93j17K5K6j69J41L5L5p5p4M1M1l6l6J6J6J7J6l7l7M0
-2145A569M1K3K3l5l5j02K07r7r6LLR9J00j75J35P7k32o5K45n8n8j81J29J3J3J11j98J05J04
-2148A668r3r3L5L6J5J5J6J5l0k9J25j85J57j52K87k4l10K06k6k7j4j5MNj06K02k9k9j22J88
-2150A690o3o4j3j4l3l3K03j07o1o2L2L2K06j04K9K9q8q7J93j16j75J35j46J63RQm4m5O5O5
-2152A604J00k09M3M2j3j2l2l2J19j90K73k42J0RJ19j91L33j84Q8Q7QRj02j01K28k88J77j33
-2154A520M1M1K1K2j33j32J51J51JJp6p7j3j3O5O4k9k9k03J06K8K9M7M8k5k5k5k5P9P9q3q2
-2157A524K80k36j00K09j98J12m3m4L0K9M9M8r3K17j38j38K2K2K1K2%%J%nmnnM6M6l1l1OO
-2159A619j88L28k20Q9pqJ62l54J17J17j5j5j5j4mlk3k3J48j63J86j23J6J7k93K23M7M7m9
-2162A599n0K4K3K3K3j9j8l8l8J28j81J41J41k27Q3Q3k26Q6Q6o2o2J5J4J5J5k9k9M8M9o9o8
-2164A480O0O1P0P0p8p8J17j94P8P7j48J62j87J23k5k4nnJ9J9J9J9m7m7j44J66%jp8K32j22
-2166A589j21R7R8k03J08j32J78J04k05j08K00m0m1J91l25J06J06k3k4Q9k22J33J33l0l0l0
-2168A598l0%JJ75j35RRk04J06J82j26Q6k23Q5Q5Q4k25J7J7P5P5j3j4Q4k26k6k7J10J09m4
-2171A614m3j1j1k27K88jkO8O8k21K93mmj27j27N1N0k6k7n1n1J36J36l86J29ooL9L9K0J9J17
-2173A736j92JKj33J77j7j6J29j80R1k19J50J51j98J11k1k1kkP5P6o0o0j33J76KKp5p5P9Q0
-2175A634j6j6j6j6opk5k6J59j50J98j11MNj5j5J1J2J1J1qrqqj8j8j8j8K1K1K1K1l6l5K55
-2178A789k60RJ0k2k2J4J3J4J3J4J4J3J4J4J3j60J50rrL0L0k81K7J12J11j4j5j4j4J5J4J5
-2180A628J5j4j4j4j4p8p8R5R6j02K07j22j21N3N4k4k4RJ0L0K9j41J68k5k6J30j80ooK7K7
-2183A589K7K7j2j2j2j2J%%%J%J9K0j63J46k8k8o2o2R3R2K8K7k23Q5M7M7QQj76J33m0m1LK
-2186A532LLN2N3j02j02N0M9M9N0m2m1J32j76L5L6J7J6J1J1J1J1k8k8k8k7k2k1J33j77K24
-2188A684q6rrl0l0R8R9m9m8m8m8L2L2m5m6l5l6J13J12j83J26m8m9M7M7P3k37K06j04J47j61
-2190A515k0k1L8L8M3M3l5l4ooK07l08J01J00j31j31K72l8m5m4P7P6k45O3K17r2m8m7J60j49
-2193A550ONJ14j96N6N6m4m3L4L3m8m8K9K9K6K5k84K32J21j89J92j18L0K9j44J65j55J53k13
-2195A403L02o5o4%%k01L14j05j04J03J03k5k6NNNNo1o0J8J7L6L7m1m1MMMMonooM6M6l1l2
-2198A582ppJ67j42kjjjj17J92p8p9J97j12J58j51QRj1j1j7j7P9Q0j59J51j33j33K87k28O2
-2200A565O2o5o5J2J2R2R3l6l6p9p8N1N1K6K7j02j03N1N1P0P0k32P7J3J3R5k14L7L7ooP2P2
-2203A627l2l2j2j2j08K02K8K7j7j8j7j8j6j7LLo0K50k28Q2l0l0k9l0J65j44k99M23j10j11
-2205A440O4O4L4L5j40J70m5m5k6k5k6k6L2L3J07k03M9M9L0K9o7o7K13r6j73J36K5K4l3l3
-2207A529K4K4K5K4r2r2L7L7J4J3J3J4KKKKj6j5j6j6N2N2p6p7P3P3mmppppK0K0K1K0j8j9j8
-2210A602j8j0j0j0j0J0RJ0RJ2J2J2J2n6n6P3P3o2o3J5J4K8K8n0n0l1l1M7M6OOPOn0n0P9P9
-2213A638n6n7K2K1K3K4K4K4l6l5l6l6llllmlllK1K1K1K1n7n6K92l27N2N2J4J4k5k5k5k5L8
-2216A501L7L8L7l6l6M0M1q4q4M5M5lmllM3M3j31J78j4j5MNm5m5m4m5K0K0%JJ77j31K3K3O7
-2218A665k43O1O0j8j8KJj18J92J8J7p2p3P6P5j32J77n5n5j09J99n1n2nnnnQ6Q6k68M0PPK6
-2221A511K7%J%JQRQRn1n1R7R7k69M1J38j72K18k96L28J9K5K6r1r0J26j83q7K23k27Q3L7L8
-2224A553J23j85J43j67J71j39mlJ56j53J95j14JKj8j8J%J%K0J9K0K0K6K5K6K5j05j05J98
-2226A714j11l2l1J23j86J45J46j06j06mmmmJ%j73J36KKM1M1k02J09j05K05J38j72M0M1k11
-2228A433R9r5K15qqj81J27J18j91J57j53J74j35K0J9L3L2k57K58j%j42J67n6n5l6l6Q4Q3
-2230A665r0r1J61j49K00j10p0p1K59n1j77J32m1m1j25J85J1J1j8j7J56j54k9k9J06J06j32
-2233A597j33LLK13r7r6K13o1o1m2m2J5J4J5J5NNNNP6P7p8p9RRRRj3j3j3j3K6K6K6K5k5k5
-2235A609J50j61noJ17j93K43k73lkR1R1o4o3NNONmmk4k3J53j57J8J7j1j2j1j2J10J10k19
-2238A483R1MLK3K3rrj0rrrj0r%%%%%j%%%%%%%%k0j9J55j53K0K0JJJJLLK3K3j71J39J38j70
-2241A547kkjkj37J73kkKKJKJ1J1J2J1j19j20L5L6L8L9J9J9J52j57J6J7J7J6j38J72j76J34
-2244A624m0m0O6k43J05J05j29J80NOk0k0k0j9p2p1Q3Q4k3k3J51j58KKl7l7J76j33M1M0k0
-2246A565k0m0m0J62j48K7K6Q9R0r2r1J0J1J0J0J8J8j37J72j48J61j68J42q5q6O3O3nnmnl7
-2249A526l6M0M1L3L3m5m5M1M1q8q8J8J8J8J9K8K8K9K8KLr4r4K00j08j2j2N1N0k6k7noonL3
-2251A583L3m4m5noonj6j5M3M3J29j79noJ4J4J4J4L5L6m2m1K6K6J03k06J64j45J0J0k0j9N8
-2254A550N8l4l4l4l3N8N8k0j9l6l5O1O1o5K45k33P8m1m0N6N6j18j18J15J14k1k1j83L34p9
-2256A680p9m7m7J9J9J9J9l8l9J35j74N1N2j23J87j61J48ppl5l6l5l6K4K4K4K4M2M2l5l6m0
-2259A534m0J8J8J83j25k9k9M4M3l3l4J4J5L4L4j79J31m4m3j0j1O7O7j5j5j5j6K3K3K2K3n9
-2261A596o0J8J8k8k8J46j63K0K0JJj6j6O2O2j3j2j3j3p9p9K23q6N5N4Rl00K57n3M3M4k04
-2264A466J05QRQQo9o9M3M2J39j71MLj6j5J8J8L7L7j90J19K34k81P2P2l7l8k4k4k4k4P7P8
-2266A615n2n1M3M3l5l4%JJJJ5J4L4L4k12R6N2N2k6k6k5k6K1K1K1K1J1J0L0K9j83J27m8m8
-2269A526K1K0N2N2k76K39n1n1j1j2j2j1O4O4j10K00j81j82K96j3m3m3mlJ44j66RRJ3J4J4
-2271A568J3k0k0k0k1J9J8J9J8J1J1J2J1qrqqmnmnnmnmJ4J4L4L4k13R6N1N2k4k4k3k4K3K3
-2274A583K4K3j8j7j8j7j7j8j7j7L6L7L6L7l7l8M0M0r7r6L3L2MMLMJ3J3J4J3ooooJ6J6J6J6
-2277A622p1p0N8N8l7l8M1M0L9L8r0r0L0L0K9L0j7j6j7j7NNNMNNNNk2k1k2k1J7J7J7J8j3j3
-2280A548j3j4POOPk1k0k0k0J9J8J9J8QPQQPQQPj5j6j5j6N7N7p2p1J0J0J0J1KKKL%JJJJJJ
-2283A566JK1K1K1K2n2n1n2n1O9O9n9o0N6N7k1k1j2j1j1j2K3K2K3K2J%J%J%J%nnnoN8N8j04
-2286A575j03q4K26j22J87n6n6M0M1l7l7j14J95j91J18l7l7J5J5J6J5n7n8P2P2j1j0j1j0K
-2289A558KLKl3l3M5M4p6p6N2N3M2M2l6l5M5M6q4q4M4M4n3n3K18r2m7m6J06J07p4p4j4j4j5
-2291A514j4K0K0j92L23j07j08K28q1J5J4j01j02J64j45o7K41m0m1k2k1M9M9j24J85p4p4P4
-2293A583P5l7l7l7l7J9J9j35J73j74J35k0j9L9M0j35J75l8l8j8j9JJ%JK0K0K0K0rj0rj0r
-2296A550j0rrJ%JJJJJJmmmmL4L5m3m2M6M6l1l2J3J2J2J3l8l7M0M0qqqrL7L7m1m0K2K3n5n5
-2299A476O9P0qqllllm8m7K9L0K2K1n5n6P0P1n9n8L3L3L4L3o8o7RJ0MNNNNNNNNNONrj0rrm
-2303A543mnml8l8L9L9mmnmnnmnnnnnM6M6M6M6m5m4m4m5K1K1K1K1k8k7M9N0K8K8m9m9jjjj
-2306A564%%%%NMNNl1l1M7M7p8p7N1N2M6M6q3q3M1M1l6l6L0L1L1L0qqqqm2m1L5L6qqqqj1j0
-2309A524j1j0K8K8m9m9N4N3k4k4OPPON6N6p3p4NMMMj6j7O1O1k2k1k2k1%J%%M4M4l3l4ONO
-2312A570NJJJ%PPPPl7l7M1M0j0j1j1j1l0l1M7M7j0j0j0j0l9l9Q9R0j0j1j65J44j81J28pp
-2315A555j11J99n3n3J8J8jjP7k33N1N1J72j38m1m1P1P0j81J28J2J3j23J86j67J42j87J22
-2317A555M1M0o9o9K3K3LMJ63j47n0m9P4P5j06j06O8O8J0J0j00K09m2m3k3k3k3k3J7J6J6J7
-2320A559k3k2N5N5n2n1K6K6J9K0J16j93k4k4Q6Q6l0l0l0l0k1k1J54j57L3L2J3J3K6K5n2n2
-2322A532L5L5m3m2j%j%L3L3L4L3k6k5k6k6jkjkj2j2O6O5j20j20J12J12p9q0M9M9rrrrK6K5
-2325A584K6K6n2n2K6K6o0o0J8J8P0P1n8n8PPPPo2o2O7O7L4L4r5r5N0N0N0N0k0k0k0k0jj%
-2328A559jkjkjkjkjnnonL4L3m3m4M5M4l2l3OPOOOOOOJ1J1o6o6J8J8J8J8K3K3n5n4J8J8R5
-2331A608R5r1r2j4j4N5N5k2k2j2j2j3j2J8J8J8J9k9k8k9k8P9P9n0n0k1k1k0k1N9N9j9j8K5
-2334A549K5K5K5l4l4l4l5M4M3l4l4K0K1n7n7O5O4j3j4J%%JnmnnLLLKM7M6l1l1MMNMj%j%r
-2337A566rrrJ0J1J0J0j2j1j2j2L1L2L1L2o2o1J5J6k8k7k8k8K5K6K5K5m3m2Q6Q6o7o8J0J0
-2340A529J2J3J3J3lmmmMMMMn8n8P1P1o6o5O2O3o8o9O0O0%%J%n5n6K2K2J2J2J2J2K7K8n0n0
-2343A521J8J7J8J8l8l8L9M0k8k8k9k8M9M8k8k9K0J9K0K0n3n3K4K5M4M3l3l4lkllj3j2O4O5
-2346A657l4l5l4l4N4N4p4p5P6P7n2n3J2J2J3J2j4j3j3j4j3j3j3j4L6L5L5L5n1n2K5K6K1K0
-2348A599n6n7O0N9j8j8k6k5N1N2j7j6j6j6RRQRn9n9P0P0m0m1L7L7m2m2L5L5j5j4j5j5R2R1
-2351A716q9q8J5J6J5J6m4m5L4L3J7J6o0o1Q0P9m9n0rrj0rk3k2N5N5rrrrnmmmRRRJ0l5l4M3
-2354A537M3LLMLl1l1M7M7m2m1L6L6k2k2k2k2J9J9J9J9K4K4n3n4QPQPK2K2n5n6M0M1l8l7l
-2357A509mlmM6M6l1l2J2J2J3J2j5j4j5j4J9J9K0J9L6L5m1m2l6l7M0M1n4n3K3K4K8K9m9m9
-2360A490J5J4J4J5M8M8k9k9K0K0n7n7K0K0K0K0kkkkOOOOp4p4N6N5j8j7j7j7ppppR5R4q5q6
-2363A492K8K7K8K8k7k7k7k7N5N6k2k3K2K1K2K1m0m1m1m0J9J9J9J9N2N3k5k5j5j6j5j5l0l0
-2365A495M8M8o9o8O0O1qqpq%%J%%J%%J%%%NNMNRRJ0Rm4m4L4L3rj0j0j0OPOPl7l7M0M1lll
-2369A567mPPOPm6m5L2L2j7j6j6j7M7M6l1l1k6k6N2N1m7m7L0L0L6L5m2m3OPOORJ0RRo1o0O7
-2372A539O8rrj0rMLp4p4P8P8%%k1k1k2k1O4O4j3j4n7n8P2P1j1j1j1j1J1J1o6o7N9O0j9j8
-2375A556j5j6j6j6O2O2j6j6k5k6k5k6MLMLN3N2k4k5K3K4K4K3o1o2J5J6J1J0J1J1j1j1j1j1
-2378A554K7K8n0m9M3M3l4l4J0RJ0Rl6l7M1M1qpqpK0K1n7n7K5K5K5K5j2j2j2j3J5J5J6J5o4
-2381A520o4O5O5qpqpmmmmP4P3n5n6n5n5K1K2NMMML0K9m8m7J5J5J5J5LLLMLLLLrrj0rrj0r
-2384A510rL0L0L0L0l5l4l5l4J1J1J2J1J2J1J2J1kkkkkkkknmmnmnmnK3K3K3K2j5j6j6j6%%
-2387A550%J%%%%k3k4k4k3M0M1M1M1k7k7k7k7J2J1J2J2lkklkklkj2j2j2j2K6K7K7K6jkkjk
-2391A590jkkopoopopoj8j7j7j8K2K1K2K1K1K2K1K1j7j7j8j7j%jj%jj%lllmllllopopopop
-2394A484PQPPPPQPJ9J8J9J9k0k0j9k0KKKJKKKKkkkkjkkkK0J9K0K0j9j9j8j9JJ%JJJJJkjk
-2398A544jkjkjLMLMLMLMLMLMLMLMj0rrrrrrrJ1J1J1J1J1J1J1J1l9l8l9l8K6K6K6K6jj%jj
-2402A554%jjJ%%%J%%%LLLKLLKLj6j6j6j6K3K2K3K2k0k1k1k1J8J8J7J8nnnnnnnnnnnnnnnn
-2406A510K0J9J9J9j9k0j9k0KLKKLKKKLLKLLLKLLKLLLKLLllllllllklllllllLLLKLLLLKLL
-2411A555LLLKLnnonnnnoJ7J6J7J6k2k2k2k2KLKLKLKLK2K2K1K2j7j6j7j7LKLKLKLK%%%J%%
-2414A566%%ooooooooL0L0L0L0l4l4l4l4PPPPPPPPLLLLLLLLmmmmmmmmK0K0K0K0m4m4m5m4K7
-2418A480K6K6K7j3j2j2j2NNONONONKKKJKKKKKJKKKKKJnnnnonnnj3j4j3j3J7J7J8J7K4K4j05
-2422A500j04O7O8j0j0O0N9o9p0M2M2l6l5J1J2J1J2J5J4J5J5o3o3O7O6n0n0K8K8kjjjo9o9
-2425A429O1O0j0j0j0j0kkkkJ8J8J8J8k1k0k1k1J3J4J3J3KKKJO5O4j17j16P2P3onm3m3L5L4
-2428A564j4j4j4j4QPQQPQQPJ%%JqqpqM5M5q3q4K7K8K7K7kklklklklklkllklPPPPPPPQj2j1
-2432A566j1j1j1j1j1j1NNNNNNNNKJJKJKJJnoooKLKKm1m1Q8Q8k3k3k4k3KKJKKKKJjjkjjjk
-2436A543jjjkjjjkjQQQQPQQQk4k3k4k3J5J5J5J5ooooM5M6l2l2n3n4P6P5m6m5L2L1qrrrmm
-2439A537mmJ7J8J8J7k1k1k1k1NNNMNNNM%%%%%%%%K5K4K5K4q6q7M2M3rqrq%j%jklklklklJ9
-2443A526K0J9J9j9k0j9k0KKLKJ0J0J0J0o5o5O5O4L0L0m7m7M5M4l2l3l7l8M0M0j9j8j8j8K5
-2446A501K6K5K5k3k2k3k3J6J6J6J6mllmlmlmJJJJJJJJmmmmmmmmJ3J3J3J2J3J3J2J3j0rj0
-2450A571j0j0j0j0rKKKKJKKKj0j0j0j0K8K9K9K8opoopooopoopoopoK2K3K2K2j6j7j6j6NN
-2453A544ONNONNoooooopoMLMLMLML%jj%jj%jjj%jj%jjJJJ%pppqO1O0o8o9N2N3k5k5l4l3M4
-2458A534M4mnmmnmnmmnmmNMNNNNNNnnnnmnnn%%%%QQQRo0o0P0O9NNNMo6o7O2O3j1j0j0j1k
-2462A545kkklkkk%%J%QRQQo6o7O3O2j0j0j1j0J4J4J4J4k5k4k5k5J3J4J3J3J3J3J3J4nmnn
-2465A559mnmnkkkklkkkqqqqL0L1L0L1k3k2k3k3J7J6J6J6qpqpqpqpJ6J7J7J6k2k2k2k2LLL
-2469A515LLLML%J%JJ%J%JJ%J%JJ%J%JJ%J%JjjjjjjjjjkjjjjjjMNMNMMNMj7j8j7j7K1K1K2
-2473A558K1rqrqrqrqLMLMLMLMkkkkjkkkK0K0J9K0j8j9j9j9KKJKKKJKKJKKKJKKj9j9j9j8K0
-2477A501J9K0K0mmnmmnmmJ9J9J9J9k0k0j9k0KKKKKKKKLLKLLKLLj7j7j6j7K2K2K2K2k2k2k2
-2481A516k1O0O0j7j7KLKKm6m6L1L2rqqqrqqrN5N5k3k3j8j8j8j8K6K5K5K5j3j3j4j3OOOOl8
-2484A520l7M0L9POPOl2l2M5M5k2k3k2k3N5N5p5p4MNMML4L5m3m2L9M0l8l8M9M9k8k8k5k4N3
-2487A535N3l4l4M3M3n3n4K4K4K4K4K4K4l7l7l7l7M5M5l2l2J3J3J3J3l0l1M7M7n2n3K5K5L4
-2489A585L5m3m3l3l3M4M4mmmnnnnnnonnK2K1K1K2j7j8j7j7kkjkM2M1l5l6ONONmmmmK8K8m9
-2493A533m9K9L0m7m8Q2Q2m7m6J6J6J6J6J2J3o5o5K6K5K6K5o4o4O5O5qpqqopopL7L7m1m0K0
-2496A538K0J9K0j5j6j5j6n1n2P7P8MNNMl5l6l5l6L7L7L7L7o6o5O3O3rrj0rj4j4j4j4K4K5
-2499A562n3n3O8O8j0j0mnnnl9l8L8L9%%%
-2500A553
##END=	
##END=	
##END=	
##TITLE=	1PulseWALTZ16-H
Sample 3
##JCAMP-DX=	6.0	$$ MestReNova 14.0.1-23559
##DATA TYPE=	LINK
##BLOCK_ID=	8
##BLOCKS=	1    
##ORIGIN=	Mestrelab Research S.L.
##OWNER=	yma80
##$MNOVA/LINK_BLOCK_TYPE=	PAGE
##TITLE=	1PulseWALTZ16-H
Sample 3
##JCAMP-DX=	6.0	$$ MestReNova 14.0.1-23559
##DATA TYPE=	LINK
##BLOCK_ID=	9
##BLOCKS=	1    
##ORIGIN=	Mestrelab Research S.L.
##OWNER=	yma80
##$MNOVA/LINK_BLOCK_TYPE=	ITEM	$$ NMR Spectrum
##$MNOVA/ITEM/POLYGON=	(XY..XY)
5321,5835
8722,5835
8722,8208
5321,8208
5321,5835
##$MNOVA/ITEM/Z=	0
##$MNOVA/ITEM/ANGLE=	0
##TITLE=	1PulseWALTZ16-H
##JCAMP-DX=	6.0	$$ MestReNova 14.0.1-23559
##BLOCK_ID=	10
##DATA TYPE=	NMR SPECTRUM
##DATA CLASS=	XYDATA
##NUMDIM=	1
##ORIGIN=	
##OWNER=	yma80
##.OBSERVE FREQUENCY=	42.633000000000002672
##.OBSERVE NUCLEUS=	^1H
##.SOLVENT NAME=	
##.PULSE SEQUENCE=	
##LONGDATE=	2019/07/10 19:49:30.000
##.ACQUISITIONMODE=	SIMULTANEOUS
##$ORIGINAL FORMAT=	Magritek Prospa
##$MNOVA/SCALES_VERSION=	8
##$PARAMETER FILE=	(acqu.par, ASCII, c:/Users/yma80/Data/OrganicMixtures/2019-04-04%20Organic%20Mixtures-2/Benchtop_Data/OrganicSample3-2/1PulseWALTZ16-H/1/acqu.par, 0)
$$ 90Amplitude1H = 0
$$ accumulate = "yes"
$$ acqDelay = 20
$$ acqTime = 6553.6
$$ b1Freq13C = 10.846059300000000
$$ b1Freq1H = 43.129485600000002
$$ bandwidth = 5
$$ dataDirectory = "C:\Users\Spinsolve\Expert_Ellen\OrganicSample3-2"
$$ decoupleAmp = -12.0
$$ dispRange = 0
$$ dispRangeMaxPPM = 300
$$ dispRangeMinPPM = -200
$$ dwellTime = 200
$$ errorProcDef = "yes"
$$ expName = "1PulseWALTZ16-H"
$$ expNr = "1"
$$ fdPhaseCorr = "none"
$$ filter = "yes"
$$ filterType = "exponential"
$$ flatFilter = "yes"
$$ incExpNr = "yes"
$$ nrPnts = 32768
$$ nrScans = 1
$$ nucleus = "1H"
$$ offFreq = 0
$$ pulseLength1H = 9.5
$$ pulseLengthC180 = 256
$$ repTime = 10000
$$ rxChannel = "1H"
$$ rxGain = 22
$$ rxPhase = 37.8
$$ saveData = "true"
$$ shiftPoints = 1
$$ usePhaseCycle = "yes"
$$ usePPMScale = "no"
$$ zf = 2
$$ 
##$PARAMETER FILE=	(datafile, ASCII, c:/Users/yma80/Data/OrganicMixtures/2019-04-04%20Organic%20Mixtures-2/Benchtop_Data/OrganicSample3-2/1PulseWALTZ16-H/1/fid.1d, 0)
$$ 
##XUNITS=	HZ
##YUNITS=	ARBITRARY UNITS
##FIRSTX=	2500
##LASTX=	-2500
##DELTAX=	-0.076295109483482115298
##XFACTOR=	1
##YFACTOR=	6.5333578502215897305e-07
##FIRSTY=	0.0010946565307676792145
##MINY=	0.00020936841610819101334
##MAXY=	0.58187508583068847656
##NPOINTS=	65536
##XYDATA=	(X++(Y..Y))
2500A675nnonnnno%%%%%%%%KKLKLKLKqpqqqpqqRRQRRRQRjkjkjjkjonnnonnnJ1J2J2J2K0K0
2495A694K0K0p1p1O4O5n8n8K4K3llmlJKKJjkkjkkjkJ2J2J2J2o0n9P7P6m9m9L2L3nnnn%%%%
2492A661%%%%jkjkjkjjkjkjkjkjj%j%jj%jj0j1j1j0L0L0L0L0j1j1j1j1m6m7R0Q9l5l6l5l6
2488A611J4J4J4J3MLLLLLLLmnnmj3j3j3j3O0O1p5p5M2M2l9l9O1O2k0k0j9k0k0k0J1J1J1J1
2485A646J1J1J0J1llllllllONOOj5j5j4j5j3j4j3j3K7K7K8K7j9j8j9j9K2K2K2K2j1j1j2j1
2482A653j1j1j1j1J9J9J8J9k2k1k2k2J1J1J2J1J1J1J2J1kjkjkjkjnonnonnnj0rrj0J6J6J7
2479A644J6j5j5O7O6r6r6L9M0mmlmNNNNqqqqj6j6j7j6O3O4p2p3Q1Q1n6n5J3J2J3J2NMMMnn
2475A648nn%%%%k7k7N5N4o8o7O8O8j3j2j2j2mmlmOPOPOPOPlllllkllmmnmmmmm%%%%k1k0k0
2471A565k1L8L8L8L7llllmnnnnmnnklkklkkkMMMMMMMMjjjjjjjjnoonoonoNMNMNNMNMMMNMM
2467A668MNrqrqrqrqJ9J9J9J9k1k2k2k1K6K7K7K7j4j4j4j4j6j5j5j6K6K5K6K5%%%%k0k0k1
2463A629k0J2J2J2J3rqqqKKKKKKKK%%%%J%%%%%%%%J%%POPPl9l9M3M2llmlKKJKklklOOOOo5
2459A620o5P0P1m7m6L5L4n0n1L0L1M1M1m1m0l6l6M6M6j0j0j0j0M2M2l9l9OOPOPOPOl9l9M2
2456A634M2nmmnJJ%JRQQRk9k9N2N3r6r5M1M0J0J1J0J0nmmnmnmmpoooL9M0m2m2MMMMjjjjJ0
2452A630RJ0J0RJ0J0Rk3k3k4k3J7J8J7J7klkklklk%%%%%%J%mlmlM2M3l9l9KJKKmlmlLMLLL
2448A657LMLpppppppp%jj%M5M5l6l7J0RJ0RNMMNlllkqqqqL6L5m6m6M0M1m1m1K8K7n3n4K8K7
2445A620K8K8k1k0k1k0K0K0K0K0k1k2k1k1J9K0J9J9%jjjPQPQn9n9P6P7p6p6O0N9qqqqnnnm
2441A644M2M1l9m0POOPJJJJJKJJj9k0j9k0K6K7n5n6J7J7J7J7J2J2J2J2j7j7j8j7k2k3O0N9
2438A668nmnm%J%JJ4J5J4J4r3r2R7R8l3l2l3l2K0K0K1K0rj0rrj0rrrK6K6K7K6j4j5j4j4%j
2435A643%%nnnnM6M5l5l6J0J0J0J0k4k5k5k5R2R2m3m4k5k6k6k6L4L4L3L4k9l0l0k9J6J6J6
2432A643J6m6m5L5L6L6L6m6m6K1K1K1K1l0l0k9l0M9M9l3l2QRQQL6L6m6m6M6M5l5l6lklkqq
2429A624qpK8K8K7K8j2j3j3j3k0j9k0j9N6N7p9p9N0N1N0N1l1l1l1l1M5M6l6l6J5J4J5J5o3
2427A639o4J8J8J3J3J2J3klklPOOOq7q8M9M9J3J3J3J3opopM0L9m2m2OOOOJKJJLMMLMMLMk2
2423A657k2k2k2J9J9J9J9mmmmmmmmJ%%J%J%%J%J%J%%JKLKKLKKLLMLMpopoO4O4j00r9K4K3K3
2419A648K3n1n0J12J12p1p1J1J0K0K0o1o2N1N0l0l1M1M2m0m0JJJJLLLLLLLLk0k0j9k0K1K0
2416A623K1K1LKKLKLKLonnnonnnJJJKJJJJJKJJJJKJj0j1j0j0%%%jp7p7Q5Q6ooooL3L3L3L3
2412A745r9j00O4O4onnnNNNNlllllllmKJJJJKJJk2k1k2k1M6M6M7M6m0m0m1m0J8J7J8J7P0P0
2408A806r3r3M9N0l2l2l3l3M9M9n4n3K8K9L3L3m9m9M9M8l4l3QPPQKKLKrrrrrj0rrQQQQPQQ
2405A656QKKKKKKKKqrqqqqrqLLLLKLLLLLLKJ2J1J1J2o6o6P1P0ooopj8j8j8j8K3K3K2K3k1k1
2401A655k2k1K0J9K0J9j5j4j5j5NONOJ3J2J3J3k8k8k8k8L2L1L2L2rrrrk1k2k1k2J9J9J9J9
2398A673NNONj6j5j5j5J9J9J9J9q3q3J08J07q6q5nmP9P9n7n7oonoK6K6K7K6jkjjp8p8N9N8
2395A660j1j1j2j1J8J8J8J7l0l1l0l1L7L8L7L7j5j4j5j5OONOjkkjkjkjkjkjkjkkkllllkll
2391A630RQRRj2j2j2j1K4K4K3K4j6j7j7j7onooJ5J5J5J4j1j0j1j1J0RJ0J0poopoopoNNNON
2388A653NNNllklllllOOOOj4j5j4j4K3K2K3K3j8j8j8j8J6J7J6J7k5k4k4k5J1J0J0J0J1J0J0
2385A671J0rrj0rrrj0rPOPPOPOPlmmlmlmlKLKLqqqpQ4Q4p9p9J2J3J3J2j%jj%jjjlllmlllm
2380A639K1K0K0K0k0k1k0k1LKLKLKLKJ3J2J3J3q0p9Q4Q4l0l1l1l0K0K0K0K1j1j0j0j1%%%%
2377A635m1m1J22J22j29j29L3L4ONNOK5K6K6K6j01j01O2O3JJJJN4N4j08j09K4K3K4K4LLLM
2375A657LLMLmmlmmlmmmlmmj4j3j4j4R2R2p1p1K0K1K1K1k3k3k2k3J8J8J9J8%%%%J0J1J0J0
2371A718q9q9P4P4k8k8o2o1L61j81l9l9J8J9J9J8jkkjkkjkpopopopoLMLMMLMMkjjkjjjkjj
2367A636kjjkjjJJKJJJKJJJKJJJKJOOOOq6q5P7P7jkkjQRQRk1k2k1k1J9J9K0J9lmlmlmmllk
2363A642llM4M3l8l9J0J1J0J0NNNNk2k2k3k2J9J8J9J9nmmnmmnmJ1J1J1J2o6o5P1P0l6l7l6
2360A604l6N8N9k3k3J8J8J8J8k3k3k2k3k0k1O1O2k6k5k5k6RQQRLLMLM7M6l5l5J6J6J6J6m9
2357A685n0L2L1j9j9j9j9N6N6k5k5k5k5N6N6l7l7l7l7QRRRJ6J6J7J6l0k9l0k9N7N6k5k4k0
2354A624k0k0j9K7K7K6K7j8j9O2O3l6l6l6l6J0J0J0J0klllklllNMNMNMMNoonoj1j1j1j0M2
2351A646M3l9l9Q4Q3n2n3KKKKpoponmnmnmnmJ6J6J6J6k5k5k5k5K6K5K5K6k1k0k1k0M6M5l5
2348A659l6NNNNM0L9m1m2RRJ0Rk9k9N2N3l4l4l4l4RRRRRRJ0RrrqrL2L2m9n0N6N6k6k6o1o1
2345A528P4P5k0k0k0j9K9L0K9L0%%%J%%K1K0j58J67j6j6l6l6l7l6K9L0K9K9j8j8k22J04J89
2342A742j37O7O8k2k1k1k1nnJ6J6j27J99j68J59l0k9rrJ2J1J1J2l6l6l6l6Q2Q1n4n5oopoO0
2339A654O0k1k1o7o7O8O9j2j3l3l3J68j59K6K5MNNNQRQRl2l2l3l2L1L1L0L1j0j0J0J0j66J60
2336A685k3k4klk4k3J73j54L1L0k8k8N4N4o9p0O6O6nnnnmmk5k5J59j67J6J6llmll9l9R7R7
2333A760l1l0l1l1kkkkKLKKLKKKMMLMQRRQl2l2M9N0o8o8O8O8m9m9L2L2nmnnj1j1j1j0j1j1
2330A613j0j1K9K9K9L0j2j2j1j2%%%%%%%%mmmlmmmmRRQRj2j1j2j2K2K1K1K2k0j9j9k0J%%%
2326A628N7N6q0p9QQQRj%%%rj0rrL1L1L2L1j9j8j9j9KKKJnonnJ5J5J4J5k9l0k9l0JJQ2Q3o4
2323A657o4P2P2j9k0k0j9j%j%M0M0m1m1M0M1m1m0NNNNk7k7N5N5o3o2J9J9K6K7n6n5L7L6L7
2320A696L6l4l4l4l4J2J2J2J2k0j9O2O2mmmml2l2l2l2Q5Q5n1n0j1j1j1j1M1M2m0m0L5L5m6
2317A637m6onP6P6n0n0L2L1rrj0rJJJJmmmmJ7J6o4o5O8O8j4j3MMMMjj%jj%%jnonnL1L2n0n0
2314A612K1K1K2K1n8n8K4K4K3K4K4K3m1m2M0M0n7n7P8P9n5n6K6K6n7n7K4K4nmnnnnnnN0N0
2311A699l1l2J5J4J5J5J1J1J1J1q0q1JJO8O7j4j4m9n0L2L2jjjkRRRRl1l2N0N0l7l7l7l7lk
2308A567llP3P4o2o3K1K0K1K0M3M2r3r3P2P3j0rL3L4m9m8j7j6j7j6O4O5j6j7rj0rj0j9k0j9
2305A594k0P0P0j1j2j3j3j3j4%%%%N1N1q5q4O5O6j6j5JJKJj1j0j1j1K4K3K3K4k8k8k7k8J1
2302A627J2J1J2k8k8N4N4m0l9m0l9L3L4L3L4n5n5K7K6k1k1O1O1j4j5j4j4pppoJ3J3J4J3j0
2299A672j0j1j0J0J0J0J0j3j3j3j3QPQPLKKLK8K8n4n4J7J7J7J7qrqrj1j1j1j1J5J4J4J5l7
2296A628l6M5M5K4K5n7n7ooooJ0RJ0RPQQPL4L3m9m8JJ%Jm6m7Q9Q9J%j82J43o9o9K16j09l9
2293A611l9P6P7m0m1M1M1qqj92J35k3k4P9P8o0o0K1K1k3k3N9N8q4q4L2L1J73j54L0K9n9o0
2290A610P7P6q5q5N1N1L9L9r6r7P5P4M8k79K16j09N3N3j9j8j8j8M3M3l9l8KLKKM8M7l40K04
2288A615M9M9n3n3P3P3j92J34n8n8M4M4k0k0k0k1M7M6j5j5j15K11n4n3K8K8K7K8m5m5m5m5
2285A569J29J30l66J77QPM1M1j8j8j8j8%%J%J%K1K1j61J65j8j8KKK3K3j64J63k25J02J22k04
2283A520J83j43L8L9J9J8MLLMl0l0N1N2q6q6P7P8j5j5j4j5j4j5j4j5O6O6p6p7q8K37k7k7k3
2280A648k3k3k3J9J9K0J9j4j4j4j4K0K0N3N4k75K67n8n8J59j67J6J7J1J1j0rJ74j52j32J94
2278A735j94J32l0l1RJ0J0J0J6J6J7J6j8j8j7j8PPK8K8j61J65j8j8j1j1r3r2J06J06n6n7K4
2275A599K3K4K4k0k1k0k1N6N5N5N5o0o0o1o0K7K7K6K7ppqpNMNNMNNM%jj%jj%jj1j1j1j1J0
2272A644RJ0Rj2j2j2j2J8J9J8J8o6o7R6R6o2o2K0K0j1j1j1j0oonoK0K0K0K0k8k8k7k8RRRR
2269A611RRRRPQPPQPPQk7k7k6k7Q6Q6p8p7J5J5J5J5NNMNj4j4j4j5K0K0K0J9k5k5k5k6ONj5
2266A612j5J36j89oL19k27R9q4q4K12j13j14K12l2l2j2j1JKJJKJKJjjJ9K0j65J62m2m1J63
2263A796j62%JJ63j62K1K1K8K9K8K9m0l9l9m0QQPQQQK8K8j82J43m0l9K1K1K2K1opooj7j6j7
2260A629j6Q5Q6p8p7J4J4J4J4k2k3J61j65O9O9j34j35K20j07N7N6K9k96K12j13J62j64jjJ9
2258A578J9M0M0q2K44k85M0J0J0J0J0J64j63K1K1%JK0K1j73J52l1l1M0M1M0M0j29j30L4L3
2256A605J0J0J0RQPPPN8N9j05j05J8J7J8J7QPQPk6k5k6k6J5J5J6J5K1K2K1K1k9l0k9l0Q6Q6
2253A777p7p7O6O5r7r7N0N1N1N1k7k7k7k7LLMLMLLMmlmlmmlmPPOPq5q5P8P8opooMMMNj0rj0
2249A629rL1L1L1L2m3m2m2m3K6K5K6K6MMNMMNMMk9k9l0k9L9L8L9L9l3l3l2l3QQQQJ2J1J2J1
2246A697o4o5P1P1l4l5l4l4P9Q0n7n6R6R6r5r4N0N0l2l1NNNN%%j%opopjkjkk0k0O1O1J6J5
2243A759j20j20J31J31l10K33n4n3k0k0O8O7o8o8QQQQL9L8L9L8k9l0k9l0J5J4J5J5l2l1l1
2240A589l1O0O1k1k1n6n7P9Q0K2K2n9n9P2P1o4o4J6J7J6J7o4o3P2P3m3m2M0L9KKKKRJ0J0R
2237A748l1l1l1l1QRRRQRRRQRj75J52l2l2j2j2J2J2J3J2j7j7J67j60O6O5R3k33L8L8j65J60
2234A684M6M6o9p0PPPPK3K3K3K4p4p4J10k16J25J25o5o5K66k78J31j96R3R3o2o3N4N4poj64
2232A539J62m2m2J22k05R4R5J26j99j6j5J3J3J3J3klkkklkkQPQQQPj2j3J38j89J79j48L6L6
2229A726j68J58nnJ6J5mnj68J58j88J38k5k5nnnmL1L1L2L1rrj0rL3L3j30J96j91J35k31R4
2227A626J47j79MNJ67j58K5K4noooJ5J5j69J57lkJ7J8k4k3llj41J84JJj9k0j9k0QQQRP9P9
2224A791q3q4J9J8J9J9l3l2l2l2J8J8J81j46J54j72rrj4j3J71j56M8M8M8M8j87J38m5m4J6
2221A663J6J6J6j3j3j3j3QPj76J50M1M0j22K04j07j07P6P7p8p9MLRQRQk2k2J62j65jkJ41j85
2219A540J72j55J92j34o3o2Q0Q0L4L4j49J76l2l2j1j2l1l1P2P1k30R7P6P6LKj81J46l3l4K2
2216A683K1k46K98j10j10J39j86J60J60j03j03O0O0l6l7O5O5j38J88K5l01R1R1j1j1n3n3K9
2214A637K8j2j2j2j3J10J11k57O9J46j81K4K3l1l2N0N0K4K5M5k82J33J33p2p1J23k04J84j43
2212A593l8K87j00r9J55j71J2J2N5N5k51K92m3m4j0j0j30j31L3L2Q2Q2%%J4J4j70J57n1n1
2210A576J33J32j20j21J44j82K4K4J87j40n9o0Q3Q3qrrqKKJKKKj9j8J79j46j46J79r0r0J13
2207A643J13j80J45M3M3j16j17K0J9N8N7j25K00m3m2k3k2ooooJ4J5M8M8k92K51l4l4j43J84
2205A706j63J63j98J29l4l5K7K7M7M8j45J81J9J8k52P5J01J02k00J26n8n7nnmnM3M3M3M4k5
2202A756k5k4k5NONOj5j5j98J28PPK8K7j3j3j3j3K4K4LMJ26k00J46j80K12j13M9N0k7k7k10
2200A502J15N6N6k5k6j42M00l32pN5N5k6k6J92j33l1l2KLKKllklO0O1j22K03q0q0o0o0K4K4
2197A619J26k00KKR7R7L9k87K16j10J02J02n4n4j7j8l8l8J78j48L5L5QRQRk1k0m1m1K13j14
2195A696o6o5L1L1L1L1JJ%JmmmnJ2J1r0r0K56p0k3k2QQQQj12j13J32J32l4l5K7K7L0k96J32
2192A581J32p4p4M2M2J89j37l5l4J6J6j67J58l3l3J23J23q2q3J9J9j40J85j81J45l6l6j5j6
2190A614K6K5K5K6l0l0n0n1K29r8k00J27R6k30J10J10k1k1k1k1O2O2r3r4J35j91J29J28o1
2187A692o1M1M0j34J92p3p3OOOOm0m0M2M1l3l3M8M9j3j3r4K32k50P7k6k5K44q1j43J83k20
2185A553J05K48k95K5K6qrJ5J4L5L5j94J32n2n2O9O8j3j3lllkm0m0K25j01mmk5k4j2j1RRj16
2182A544K09n5n6M2M1r5r4J02J03j63J64L7L6p8p9L3L3j70J55J22k05k1k1J39j88J32J32o2
2180A737o1K0K0j27j26R8R8P8k48K55p1l6l6K09j17%Jk24J03J80j45N8N9n1n0J1J0J37j90
2178A592J57j69J46j80J40J39k88L8K41l02N7N7K4K3j8j7j8j7Q9Q8QPk8k8q9r0p9K46j9j9
2176A691mlmlK6K5n5n6Q5Q6q5q4n4K73j00j01P6P6j14j15O9O8j3j3k0k0m1m0J75j51L3L3L
2173A643Mj7j6K33r3m5m6l5l5M6M7j3j3j3j4L0K9n2n2P4P3o2o2RJ0RRPOk7k7K70k74L2L2M5
2170A712M6k75N2M0M0O1O0k9l0l0k9P7P7j87J38k2k2kkJJKJp7p8K42q5k3k3J7J8J23k02J64
2168A756j61N2N3n0n0L6L6L6L6m8m7N4N5k42Q5N7N8k03J24M2M2j72J54j93J34r4K32j3j3p0
2165A686p0J14k13J07J06NNm0l9k0j9j26K00o5o5P9P8llm0m0M1M1o2o2j09K16l3l3j3j3J07
2163A717J06M5k81M5M5K5K5n4n3K8K8m3m3J40j86Q0Q0k3k2qrJ2J2j21K04J5l11J52J53mmq8
2161A662q8K7K7J86j41M3M2K5K5j11j11P1P0o5o5R2R1j19j18J74j51K57k87M7M8J97j29J3
2158A712J4k7k7J35j90P5P5l3l2M9N0o4o4J8J8k3k3k3k3K1K0K1K1n6n6J00J01k01J25l8l8
2156A637q1K46p4p3L6L7o5o6K32r4m7m6KJKKL1L0n0n1O3O3n3n2r4K33q6q7N3N3k13J14M1M1
2153A685O1O1j04j05k3k3J02J03l3l4RJ0j75J52k0j9%Jppk7k7K48p8l1l0J0J1n1n0n4K72j22
2151A705j22K06j21j8j9N6N6k6k5K8K9k37R0N9N9n6n7K8K8n4n4M7M6M7M6%%o2o1j12K14n2
2149A668n1OOj4j4K10j17j4j4j7j6J67j59R0R1o6o6K9K9n3n3J0J0n1n1j20K05M2M3j62J65
2146A733j9j9r5r5K92k51M9M9j68J57rj0L1L0q4K41p8p7O0O0r6r6J60j65K01j25P8P8j87j87
2144A458P1P1J74j53J8J8kkm3m3R3R3n1n2p1p2K37q9m1m1N4N4j50J76M6k81N9N9N5N5k7k7
2141A646M0L9j44J82L2L2l69J75j04K22j92J34k3k2J8J9k04J22K10l33L15k29O4O3j43J82
2139A732q2q3j9j9Q2Q3j72J54N2N2r3r3J72j54K9L0RRJ5J5j48J79j68J58j69J58j83J42k0
2137A668k1%%Q1Q1q6q6mnL5L4L5L5j19j19N1N1K14j12l1l0J32j94K74k68J62j63J69j57k8
2135A599k8Q7Q7J0J1J0J1l6l6l6l6L2L1L2L2j7j8LLk06J20J9J8MMLMj6j7J67j59M0M0o2o2
2132A638Q1Q1n5n5k9k9k9k9L5L6N6N5k32R4qqM0L9P4P3l29K14j0j0O4O5k21J05J06k20j6j6
2130A560M6M7J48j77k3k2K84m78K75n1Q5Q5n7n6M5M6j89J37j48J78l7l7j6j7m7m7Q9Q9pqJ3
2127A710J3k33R3rrP1P1j0j0k8k7k7k8K7K8K7K7nnonp2p1K67n8j43J83k04J22M6M6o9o9N8
2125A701N8m4m4J35j91P4P4l5l5O7O7k09J18j14K13o8o8J4J4J38j88J78j47l1l0r8K27p0p1
2123A635N1N1j77J48l5l6O5O4p2p2J37J38j08j07P3P4k8k8P1k54J1J1K7K8K7K7j00j00J11
2120A632J10j37J89p6p6l3l4J02J03k8k8ppj25K02o3o3M7M8q8q8K4K4LMJ66j61LLJ16k09J57
2118A710j69J27J27l0k9OOOOk6k5k6k6K5K6n7n6k4k4J93j33L15m45R8R8l2l1K9L0Q9k37K11
2116A732j14N6N6J6J6Q2k45K1K1P1P2o4o4M8M8l4l4j2j2j14K12J5J5K8k97J16J16k24J03J2
2113A642J3K50p6l27K16M6M6k00J26l7l7j57J70J89j36j48J78ook32R4M6M6l0l1N2N1m4m5
2111A653k68K75M4M4j06K21p2p3n1n2O1O2j9k0L2L1j51J74j31j32K09j18L4L3J4J3j9j9j9
2109A650j9J4J4J4J4ooopLLK3K3j60J66j7j8KJKKJKK2K2j94J32J32j93K0K0%jl5l5J76J75
2106A936m56L05j44J83k8k8qqp9p9J05J04k52P4L3L3J55j70J3J2k6k6noj18K08j58J67r7r7
2104A543Q6Q6oonopoppL5L4L4L4l6l5l6l5NNONl2l2K74k69J5J6J86j41j40J85j8j8K2K3j61
2101A591J65m3m2m3m2J61j65K22j04j42J84j9k0j0rJ53j72R9k26R9J00j3j3j2j3nnnnj5j5
2099A636j5j6R0R0j08j07L41k03q0q0K02j24N9O0QRQRk8k8pqj90J35k8k8j75J51K73k70O6
2096A642O6N3N2k54P1P2P1j83J43o1o1J62j63jjJ32j94J72j53Q2Q3j01j01N8N9N9N8l9m0J43
2094A826j82J1J1rrl3l2J30J31j48j48J5J5K5K4j0rK31l11K79k64K25j02M9M8l3l3J71j56
2092A712j11K15j72J53p0p1J13k13K34r2j33J94J52j73j54J73m2m2J27j98K90k53J2J2J76
2090A839j51L3L3k9k8J55j71k5k6k6k6r8K27j40J87PPn4n4O3O3j20j20K19j07R7R7k12J14
2088A754o9o9J5J5nnK15j12m4m4J50l94K79m7q9K36j50J75k2k3J9J8k06J20m3m3j06K19L5
2085A779L6p3p3K33l11K9L0J6J6j47J79K9L0k75K68k20J05J7J8j26K01j61J65j9j8R7k29J04
2083A700k22L20k23O3O2j2j3m6m7K80k65K1K1J50j76J57j69L00k44M1M2m1m0L88l73KKJ58
2081A836j68j17K09ONo9p0r0K37j7j7p8p8J96J96m02p6K88k56J72J73l16J0l1l1K19j07P6
2079A700P6Q4Q4l71m5J69J69j91j91J49J48j4j5L3L3j29J96k32R4o9o8N5N5ooq7K38j07j08
2077A644M0M0M0M0qqrqm8m9o9o9K07j19R8R9k85K58m8m7m8m8o9K58K8K8k16J10j7j7LLo2o3
2074A589P3k54M61l00J28J28j42J84k84M1K00j26q5q5J75J74r7r7M3M3k63K80m2m2rqLMj8
2072A674j7J46j80LLook6k6J98j28L5L5J77j49j49J77p9p9L69l92P8P9n1n0K9L0n3n2J25J25
2070A840k49P7M2M1j69J58k97K48J25k01J09k16M43j01j31j30Q0Q0p1p1j0j0J95j30N3N3m9
2067A709m8L2L3K8K8M8M9k49P7mmj55J71r4r3J17J16j9j9K1K1m0m0j25K01m4m4j14K11l3l3
2065A704j18K08k61O6K02j23J29j98L1L2J1J1K5K6n5n6NOL11k33j07j08J78j48M3M4J80J79
2063A984l68m2J49j78O2O2K24j01j05j05L84l77J33J33j26j25J58j68J6J6J5J6J6J6P6P7k42
2061A600Q3LKK2K3l0l0N2N2q6q6J7J6r0K37k12J14opJ4J4L5L4j02j01L4L5N5N4q1K45k37Q9
2058A762j73J53j0rk9k9n6K70k14J13n1n1%jK0K0j51J74k9k9K10j15o8o9J00J00r0r0j8j9
2056A621O3O3l5l6j5j5j58J67NMj12K13n1n2k4k4J60j67k8k9O6O6K02j24k3k2m6m6L6L6n2
2054A643n1Q5Q5n3n2J51j75r4K32n2n3N9N9k06J21j6j6MNR1R1j74j74K24j03%jJ39J39j06
2051A802j06M2M1r4r4PQPQK6K7j36J90j98J29M7M7m4m5K00j26J08k18Q1Q1q7q7ook0j9J36
2049A701J37k30R7J57j68P4k52J02J01J3J3L3L4k25J01l4l5L09k34R2R2k29R7nnn2n1O4O3
2047A760k04L39j37j36j86J40J47J47r6r6OOK18l27%%j14K12K9K9rqrqJ1J2p0o9P9P9kkn8
2044A683n8P8P7j3j3j3j3%%j9k0J22k03O2O2p8p7J06k20J49J49q2q1K03j22j23K04j15j15
2042A530J30J29R4k32L3L3onj08K19m6m6onj59J67NMj54J72j1j1l9l9O2O3j66J59k4k3KKK
2040A726Km9m8L2L3L5L6m7m6k6k6N6N6p5p5j4L12k11k10L80j63j54J72L6L6m1m2o2o3K16j11
2037A665P3P2q8q9ppP6P7j07K19j76j77K72n4j04j04J96j31J52J53l43K00k35R1n8n8N0N1
2035A609N0N0j8j9O2O3N3N2q3q4k3k3k4k3M9N0n3n2J69j56J29j97L8L9J9J8n4n4J36J36m6
2033A813m6k08J17j60J67MLJ3J2J2J2O1O0J76l67j%O7O7j83J44m1m0K6K6n5n6O2O2l9m0K15
2030A883j11J19k06K1K1o1o1j20K06M3M3j44J81j37j38N4N5N4N4k3k4J0J1k30L15k77K66j38
2028A666J88r8r7l0l0K76k67J7J7r8K28j62J65j68j68O4L89k42Q4J53j72n1n0L1L2N1N2j06
2026A674K20m5m5n8n8j81J46J27j99J67j58K78m7N4k72R0R0j21j20R5R5j70J56k6k5j21M23
2024A969p0p0k40Q6K00j26L1L0k33L10kl28J09J08m8m8k5k5k5k6P4P3j92J34j0j0J93j33k0
2022A686k1M1M0PPj77J50J0J0k75K68p4p5M1M0o1o1P5P5M2M3j61J66J10k15l2l2J17k10N5
2019A589N5L0L0RJ0J40j85j85J41NNK6K5K1K1j3j2K47k97R1R1n1n0n1n0R3R4r6r7O7O6n0m9
2017A670j10K15K6l01J22J22l5l4n7n7K5K5K5K4N9N8k28L15j47j47J61j65J21J20j58J68j78
2015A639J47k31R5J16k11P6P6j27J99l0l0N8k68L80j64NOj33J92p2p3J5J4J4J4J02J02k72
2013A639N4OPJ76j49J95l49P3P3LLMLn5n4J29j97O6O7K5K6J9l06L72j70N3N4J9K0o7o7ooJ57
2010A817j69R6k30K14j12Q4Q5k14L30j60J67j67j66K48p8j73J53k14J13j02K24K31l12L1L0
2008A726J8J7k01J25P7P8r2r3j0j1L1L0J1J0J01k26J9J9K90l6m91K70J84j41k6k6o9K57o2
2006A779o3j4j5j5j5K9K8J92j35J53j74j1j0r5r4J50J49J1J1k54P1j2j2RQLMLLONj5j5J81
2003A846j46L7L8j16j16K36q9J86j40M3M4k16J10ol31M44r9r9K27Jl25K65k78J76J76j78J48
2001A838q4q4m3m4j03K23m1m2O1O2J09k17O2O2J56l86J58J58RRk79M6N3N3o7o8L5L4j63J64
1999A671J63j62k9k8J34j91J51J52k42Q3O5O4j7j7k91K53n2n3r0r0L32k12J46j79k00L43m7
1997A657m7o1K66k7k7J4J5k00J26J26k00N9N8m4m3Q5Q5j06j05L4L4m7m7L5L6j00j00R2R1p1
1995A588K55k28R8j47J80r7K28l21K22j13j13J65J66p3p2n2n2q4K41j05K21k55P2j0j0p5p5
1993A554o8K58q9q8M7M7J81j45m3m4J13J13q4q4K86k57J71l73K96k9o4o4J79j47L6L7j27j27
1991A485K40q6j60J66J11k14L05k39M7M7K8K8j36J91j78J49k39L04j19j20P8P7k9l0k9l0K1
1988A668K1%JN2k75J06J06k17L27k84K59K3K4j27K00j30j29J56j71J00J00q4q3J3J4k0k1L06
1986A935k38O8O8j40j39K06j19O1O0j43J83o2o3m3m2O1O1m1m0K70n6l5l6j06j07L6L6J60j67
1984A628o4o4J48J48NOj19K07j60j59K61o4k28R9J27J28j24j24N9O0j04j03J13J13k13J13
1982A689j31J94J2J1J16k09k6k7N7N7k4k4N0N0j12j13J14J13j86J41K29l15J13J14k03J23
1980A813k84K60q8q8K7K8n4n4K17K18j67j67Q5Q4P6k50J4J5Q9Q8k58O8M8M7k44Q2j70L74k98
1978A511K45RRl8l9N0N1l1l2L6L5k6k6j78J49n5n5J64j61K1K2O0O0j23K03m0m0j21j21K25
1976A764j00J03k23Q8Q8r6K31k10J15o8o8K04j22O1O2k6k5n9o0K09l34J54j71J59J59N0k76
1974A609Q1Q1j23K03l6l6l6l6J42j84%%O3O3k36R0K78k64%%r9K28k21J06l7l8O5O5J27J26
1971A981n45K15P3P2k73N2J84j43J03k24M44n35L83j61%JK7K8k73P05m84O0j16K09J07k18
1969A672M9N0J99l44jjJ22J21l33qK37q9O8O7q8q9P5P4j16j16L3L3J15J14j37j37J28J28k69
1967A557N6O4O3j9k0J4J4j58L85l15J1J52j74J0J0J70j55K8K9mmmmJ29J30l65J77j18j18K15
1965A756j11J75j52J2J2J16J15p4p5m9m9p6K50k05J21M0L9r9j00K9L0l74L88J43j83R9R8k62
1963A614O5J36j91J4J3R0R0j75J51rqr0r0J75j51L3L3PPK8K7j26K00j46J79k36Q9K12l31K16
1960A826j10j84L59k03k03K72k71J57J57o7o7N7N6p9p9LLK06j19j69J57m7m6L4L4j49J77M9
1958A754N0o6o6O7O8n03M76N4k72K38q9K7K7K6K7k67N9M5M5J15k12j64L80M6k79J9K0L8L9
1956A702J06k19n2K75j1j1j0rj0j0k7k7ppq6K40M9k76QRJ51j74K84m1k66K78m3m4rro9o8K37
1953A854l07J98J98k64O2j6j5K5K4j38J88r7r7K49p7r1r0K56k88K02j25L4L4o8o8J72J71j00
1951A826j00j9j8J64j61j5j6J48j78M6M7K6K6L9L8l29lK40q5J6J6J33j93P2P2n9n9K2K3O8
1949A787O8r5r4L4L3m7m8L4L4L4L3q4q5J80j46J14J14o9o9r8r7Q6Q6j89J36m6m6R0R0r4r3
1947A553K22j03q4q3J52J51j1j2ooq8q8L4L5L4L5J6J5j67j68K91l5j5j5M2M1J09k17K28l16
1944A544J52J53k12J13J34j92j83J42J02J02j13j12Q5Q5k55K89j79j80K04K04k0k0l76L85
1943A852l48J94NML9L9j29j28o0K66R7k28J59j68NMO5O6N3N4k93L3P0P1J11k15j6j6K29r8
1940A717NNj5j5L0L1L1L0p0p1J13k13J1J1rj0L0L0L0L1M0M0l54M07j68L76l38j2R9R8j73j73
1938A544J99j28J37j89K33r4QQj28J99j69J57j22j23K64o2j46J80k4k4j8j9l9l9K67n8j40
1936A674J87k23k23K32r4L29Kk82K60j81J46nml8l7j7j8k2L04l89L71j63j63J90J90l35K09
1934A900m03J41J9J9L3L3J35j91P3P4o1o1j63J63J1J0n0n1N7N7j33M10k70K72j55j55J76j50
1932A740k38L05l80J64o0M84k63k63J78J79r5r5PPj37J89OOp1p1J20J19p7p8l0l0L12k30o1
1929A637o0P7P7J6J6k04J21K0J9R6R7k03J23k94L2MNJ21J20Q0k47j10K15j98j99M00P5r5r5
1927A646r2r2K28K27k43Q2l9m0J35j90L32k11j51L92k46P9k44Q1J09J09k17k16L68j75J37
1925A769j89q7K39M2M1JJj62J64l25K19lmj32J94j68J58n3n2L49m12J18J18k46Q1k1k1O6O6
1923A751j17K08k5k6j88J37M4M3k56P1L8L8k47K96l7l7j66J60j20K06n9n9J85j42M3M2m4m5
1921A694N8N8k17J10j2j3J46j81LLP1P1j1j1r3r4J91j34K25l19J23J22j66J60k47K96q1q0
1919A672k17L27r6r5K43k99J52J52k22J05k78K66n3n4K74k69N6N7r0K37q3q3K3K3J58j68k52
1917A486K91l5l6K5K4j59J67m2m2j23K02o0o1K65k78K8K8opM9M9l3l3J2J1J74j51L9k87J76
1914A673J75j05j05j19K08J73j53k15J12R2R1k4k4p0o9Q7Q6j41J86j48J79l22K22o3o4k2k3
1912A617K43q4l0l1N2N1j39J87l02K42q4q4K35l08K29r8n0n0j67L77o5o5P3P3o3o4rj0k9l0
1910A617L11j4k59O7r4r4O2O2P3P2o3o3L7L7j66L77k16J10j41j41K53p3j48L96n74J87J46
1908A761J46j20j19N1N0k59K85j23j22J71j54P6P6K35l09mlJ07J08J56j71jjk1k1k4k4K4K4
1906A794J31m13QL35o6o5N7k69P5P5m6K79p8p9k20J05j19K07j39J86ppm8m8j06K20L7L7j94
1904A642j94N13m66L46j97Q1Q1k17L27m0m1j99J26n7n7q3q2J28J28j37J89j57J68k52P3K97
1902A920k45l7l8K28r8j57L85m29L31k32R4L9M0q6q5J7J6K12l32K60k84K54p2mlN7N7r9r9
1899A610J96j31N2N2j7j7j7j7K7K7m49L12K48n13L02k4L02k41l8l7Q8Q8J36j90n3n3J91j35
1897A699OPj4j5N6N6k84M3L00k6k84K60k68K74j7j7J71j54q7q7K63k79J07J07J1J0J1J0q4
1895A775q5N1N2j00j00J65j61J26J26l02K42k88K55J66j59j5j5l6l6NONNK9K9k76K67L7L8
1893A806m4m4j58J67k46P9L92l69K83m3k78M9J64j62P7P8n9n8n0K76j52J74k30R7J4J5K8K9
1891A835l79J65j58L85k73K69q0q1L4L5QPJ23m20J24J25m5m5P7P8l9l8J78l66J30J30j1j2
1889A756j1j1j08j08J56j69J09J09j97L47k98K8P0O9rrk54K90J43j83j49J76l5l5r7K30j50
1887A660J76j71j70L61m00L14k30K06j20K54k89K9L0J79j47m0m0N5N6J50j76J91j35m6m6K52
1885A903p3p1p2K3K4P1k55J39J39k92L3J43J42m21L40M7M8q5q5j33J94m4m4N8N8k0k0J%j89
1882A559J37o6o7K50p7j38j38Q9Q9PPL5L4J16k10K24j02n4n5p0K57k54K90Ql19J44J43n7n7
1880A725j93L50l55J88Q0k47K11j16J97l47L63L6k62O4K03j23j84J42l8l9j40J86L3k93K29
1878A670r6J19J19j46J79j75J51R0k36ook6k6Q6Q6n0n0K2K2K2K3PPk38Q8j19K07k00J25l1
1876A618K96j46j47K26l18nL21k4k4mln1n0j31j32J55J55J3J3j44J82k1k1P0k56R1R1O6O5
1874A885k81M6J57J57l11K32Q9k36J5J5k53K90NNj97J29K71k72j49J76o1o2J66j60K4K4K3
1872A727K4K3K4k6k5m6m6R0k36K94l2j58j58K22K22k98K9K8K9j94J33K55k89O8O8j29J97j75
1869A621J51m6m6K59k84M2M3j59J67k20J07J04k21L69j74j22j23M21j23q8q9J42j83J49J50
1868A847j42j42O7O6l5l5P6k50J5J4J65J64j07j08L3L2J3J2N1k75L30MJ77l67k0k0K18j09
1865A674R6R5j76J49j15j16KKl9K87J08k19j5j4O0O0k46K98j30j30Q8Q8j57J69l5l4R5k30
1863A615J16J16j48j49J23J23l3l3l3l3J36J37j14j15j35J90j76J50J1J1j52J73J0Rj33J93
1861A859j61J66j94j95M10j33j54J72j42J83o0o1J8J8J8J8l4l5k25L19K33n28R7R7RQRRo5
1859A656o5J18k08P1P1N0N1o5o5J18k08R8R8R8R8k58O8j16j15J23J24l9l9n5n6J90j37J64
1857A770j63J64j62J30j96J50J51k33R2R3k33N6N6L6L6m7m8J37j90M1M2J03J04j3j2k30R6
1855A730K11l32N4N5J07k19jjM38l23j59J66K7K7M8M7n4n4n5n4n6n6K70k73l9K87o5o6poP5
1852A722P5p6p7Q0Q0k51P4opK38l06L06k38O6O6Q0k46J34J34J07k19j3j4j4j3j11K16j24j24
1850A539K53p3k5k6P2P2N1N2l2l58k08P69j72j72k07L37k97K8L4L5j42J83j02K24j10j10J75
1848A790j52N6N5L5L5qpm22N56j75j76K05j22K3K3LLj9j8j88L55l5l6J82j44K1K1j36j35Q7
1846A677Q6Q1k46J70J70J4J5j77j76k6K99k43L00l38j2m8K78j%j63J63k0k1r7r6K90k53J49
1844A775J48k1k1j88j88K40q5k0j9K45q1k25J01Q1k45K48K48j60j60l7K89l1l1q2q2j03j03
1842A493L66L9l26K16K7K7k45K99j4j3q2q1k09L35RJ0k9l54O17n79J96j30K84k59J52J52K
1840A903Kk43Q4Q3k43J47J46j0j0JJq1q0J15J14j09j09j17K10K6K6p4p4O2O2N3N4q3q2l5l5
1837A704M7M6j06j06N0N0j03K23m2m1N6N6J38m05L07k35L6L6PPj3j4J11k15K74k70K2K2p3
1835A569p3k4L02m4m4j0j0l0l1K6l00J75J76p3K53j1j2K8K7PPn9l85J6L42j07K20l31K13o1
1833A756o1J03J02l56M04k06J19l1l2j1j1l1l2J52j74RJ0j1j1m0m0J23J23o9o9J55l88J89
1831A672J89j17j16N1N2n1n0J01k26Q8Q7K81k62K20l23j70L73J3J3m3l70K49p7K11j15O9O9
1829A818j87J40J06k20K48k95J53j72K19j06N7N7j14j15l3l3J10J11J30j95J0J0P2k55K59
1827A775o7J4J4n7n7J07J06m5m4k4k4o0K67q0q0m0l9M2M3k4k4J25k01K52k91J22J23L1n12
1824A352M58q4N4k72J49J49j54j53J19J18J0J0j74J53k5k4M4M4k87M73l01K5JKK05j21j6j5
1822A740l6l6l9m0J78j48p8M65k41k42O3O2J65j62Q8Q7j16j17K00j27N7N7l0k9j12K15j37
1820A687J90j37j37Q7Q6p7p7n4n5K51k93J70J69j63J63J54l89P9Q0O7k59L94j50j4j4m9m8
1818A661Q5Q5r9K28j53j53O4O5k09L34j34j35j3j4M7M7Q6k41J05J06LML7L8l11K33j75J52
1816A743j29j29L60j83k8k9K44l00Q9Q8J78l67K80m7j41J84j41J84k44Q3K3K2M3M3p4p4K32
1814A910l12P8P8K21l22j95L48O3k63L32m28J76J76l86J57J98j28K2K2K2K1j47J78j89J37
1812A769J32J33m05J39j56J70m1m1r3K33k15J11RRj54J72ooL5L4o9K57m29J15K58k85o1o2
1810A553K26l17M91n3j51L92o46J13R9R9j26j26R0R0j1j2J68j58n6n6J29J29n4n5Q8k37J29
1808A738J29k40Q6j6j6J19J20m10L51l6l63J40J40o1o2J35J35l11K32O2k63K96m63K15K15
1806A872j30j29J42J42j09j09N4k72J97j29L4L4J46J46l43j7K75k68N7N8K7K8j57J70j4j5
1804A690K7K6j92J33J1J1N7k69K61o5rj0J54j72Q0Q0l68L93n6n5J95j30j69J56o7o8L06j9
1802A931%%j46j47mmK48p9n8n8n1n1R2R2Q7k39J08J07j22j23K65k78M4M4r2K35j05j05j05
1800A486K21q3q2K84m2p0p1R3R3k89L7K40l02K24K24k64O1n0n1q5K42J44m00j2j3K24j02m9
1798A608m8j43M00o8o8O5O6p7p7j07K18m6m7p8p9M65k96L1k95K90l7o4K63k07J20N2N2l21
1795A572MJ80j47N7N7m3m3L45k00j39j40J45j80J76J76j44J83k37Q9L54m06Q2Q3m7K80l54
1793A703k8K16j09J15k12K17j09jjQ1k45J12J12m4m4M1M1m1m1o4o4P1P2kjkjlkkL23m84K76
1791A880l15J2J40J41M5k81J10J10k97K45p8p9L84l78m6m6K80m7J09J09j4j4jl28O6O6j59
1789A614J66l7l7R6k29L6L5RRR0R0j21j20J78j47K05j20l9l9M1M1O1O1k14J12j1j0O9k56K46
1787A779K46m22r7K10j17M85k76nmp2p3K95k49K66o1k77K65j98J28k04J21Q6Q5j38j39J00
1785A734J00J9J9m5m4j46J80qqJ3J3l5l5l5l5R6R7k77M9J32J32k21J05J0J0j06j06L6L5J37
1782A816J37k54P2P2k54L9M0q3K44j55j55K59o6L04k40k20J07N8N7P1k55J5J5J44j82K08l34
1780A460K35r0m5K82l09K34p7p7L9L9M1M0l87L73mnj33M10l99L63n62J99K37q9j64L80j52
1778A839j52j6j6n4K73j76J50q4q4o4o3O0O0O0O0r4r5r4M49l38K06mnJ27k00MMj88J38Q4Q4
1776A871K49k95J13k14k8k8o9o9K86m0J77l66J58J58l9l9m8m7j29J97k55P1R1R2k20J07J07
1774A791J06k29R7q6K40k29R7j00j00L28k16P0P0K0l05J63j63kL23l28K14o9K58l61J82O4
1772A835O3j74j74J32J31k15J11k4k4j46L97J04J03m33L28k20J06j11j11m8m8K37q9j92J33
1770A671J2J1rrrrK1K2M2M2k00J27k40Q6J09J10l4l3N6N7j68L76k14k15J66j60j5j6J27j99
1768A505K21j05K4K4J73l70K82m4j15j14J36J37l0k9rj0O1L86l40j4j57J70OOk23k23K66K66
1765A880j9j9k0j9N2N1j11j12Q9Q9K31l12o3o3M6M5Q7k40K15K16k46k47L52j92m7K79k86M1
1763A677llP8P8Q4k43k5k6k31L13j4j3K99k7k99K7q1q1K12K11j27j27J25J24O0k65J9K0j55
1761A607J71PQj25K01j46j45j0j0N00k61K7K6j03j03klP9P9o9o8o9o9J56J55qpj07j06J58
1759A763j68J76J75j37j37K25j01j9j9J42j83l5l4K06l37J32J32n5n5p5K50r9j00k23L21m
1757A741nq0M64n59j5J13J14j57J70k79M82j20j20RJ0K4K4k3k3k88K56k74K69r2r3L09j8k31
1755A608R6J23k03L67j76n4n4j5j4Q7Q7k44Q2j22K05L5L6k70K74L4k92O8O8J54j73N9N8J51
1753A975l93k7k6J69j57r6M47l01K5K62k81J32J33k89K55j07j07J72j54K14j11N1N2p6p6K30
1751A916l14J00J00r6r7O6O6j5j5n4n4K31r4r5K31k78K65j32j32K4L50l43K01q5q5P6P6k71
1748A542N6MNM5M5q3K44k66K77M4k83q6q6K92l3j3j3j08j08L95j49k06L38j51J75k03L42m13
1746A603J31q0p9L00k5r6r7k8K97r2r2p2p2O7O7J02J01k93K51k73N4K75k69k69K74K63o4k81
1744A603K63l33K09j02K23J09k18Q8k37J13J14p0p0M8M8Q2Q1l71J72m6K81r5r5Pl19L08j8
1742A775j9j8o1o1q2K45J37J38k98K9r4r4L13k30j6j6J13J13m0l9O2k64P0O9j69J58K18l26
1740A613K65o0j24j23K77k66L76l83j1j0K78m7j36j36J70J71K8K8l71m5K26r9N4N5J36J36
1738B002k85M1j22j23J80N05o22J39n0n0J54J53k87M0m3m2P3L99k81k80L57j87R2k35J89j38
1736A579K6K5k3k2J68J67j38j38L2L2k29L15M3M3k87K57l95L65o5o6j7j8L6L7L6L7k4k5k14
1734A537L29J22k04K57k85j47J79l8l8p4p4R6R6P5k51J98J97k81M4r8K28l57J85l8l9L56L0
1732B005m40N39m07J35k7k7j02j03K92l4k05J20kkr1r2M4M4M7M8M7M8l9m0j8j9j33J93j73
1729A608J52o8o8O7O8j64L79j17j16%Jj83J43R6R6k0j9j1j1l2l1Q0k45m2m1J04M31n34K26
1727A749l2l2J85J85l65J78o6o7J79j48k29R6M0L9P9Q0j97J29J49j76k28R8Q5Q5J3J4q9q8
1725A666J60j67J19J19k73N3j24K03oopoK65o0l4l3l46J98P5k51J36J36L3L4n1n1n1n1q5q5
1723A510K14K14j94j93J59J60j0rj93J33L3L3j91j91L05L04l00l01L42k02N7N6l13K30OPo
1721A660ok6k6J86j40j06K20K31n31K37K37k15J10p3p4P5P4k10J15k12L31r0q9q5q5K55p1
1719A692L85j58j5j6j34J91l78J64r7r6L04k2j18K07j32J93m36L24q3q4R7R6o6o7J9J8j65
1717A623J62k8k7j91J36n7n7J81j45L18m42K37K37j63j62l4l4M17j27J6J5j10j10qrk8K97
1715A907k93K49k6l53L20ol2l1q6q6L83j60j8j8ook6k6J86j41l8l9J09J10l94o7M53l07K83
1712A841k60O6O6M60l00p2p1J53l91L16k28L29m31P0L96j41j41K57k87K02j23N2N3L2k94J84
1710A738j41K40q7k73K70J27j98j0j0j32J93p4p5L3L60j56j57K11j16M7M7q9q9K63k81K08
1708A849j18k1k1o2K63j14j15j3j3m7m7q9K38J72j54K9K9J39j87k75K68k43L01j55J71ONr6
1706A700K30J9l07O0O0MMp7p7O0O0O0k65L08j8n2n2J25m18L62L7j3L12l46k0j62j63M49l12
1704A568J51J51k6k5l11K32R0R0j19j19j40J87q5q5M04j39j21j21M2L69j52j51O6O6l00K43
1702A765K43l00j00j00J38J38j47j47K54K54m00p3J97j28J15J14j71J55O5O5l63J81j65J62
1700A752rqJ53j73p2p1J23J22k0k1j22K04l26%K32K32j01j01m5m5K48n14J67J66n1n1j56J70
1698A683J50j77J49j76j4j4O2O3Q9k36J99j27K20j06j3j4r4r5k7K98r6r6J64j62JKJ87j38
1696A682L71l89J18k08J19J18j34j33j8L08j18j19K96l0j49J76k11J16n5n4n5n4L01k4j19
1694A735j19j02K23K24j02l4l3O1O2k25L18l95J48k68K75K48k96j30J95k26J00K98k8k65K77
1692A941j28j28M2M1j27j27R7R8J71j54j54J72j8j7l03K41M3M4mmJ0J1J12k13M1M1J02J02
1690A932j23j24J2J2L5L4j49J77r0q9J95j30L8L8r8r8j00K26l9l9M7M8M7M8J00J00k95L2J51
1688A898j75m00L62J24J24k57P0j7j7j7j7J62j64K0J9ooj42M01R7k29j2j2p2p1L0L0j02K24
1686A845q8q9M42l20j76J49Q3k42K26j00MLj6j7Q2Q1j01j02K46n14N86j75o1o1K7K7j2j3K94
1683B008k50o9o9m2K84q3q3N3N3l04K38J16k09K8K8PQJ7J7L15m45L52m10N3N2K22K21n05K55
1681A858j45j46L99j46j01j01p4K53k83k83M85n8J90j35J97j28j32j32J87j39K63k81N54m23
1679A679Q4Q4j40J86j97J29J%k68K75l1l0j89j89L89j55R5R4m1m1N2k74K56p1n1n2R1R1j40
1677A637j41N7L83k53k52M54q9J6J6j67J59l42K02J8J8j77J48n5K71p3p4l3l3j09K18k72K71
1675A798j4j3jL26l26l27L87O1j89J37j68j68K66n9J24k02K21j05j26K01q1q2K86m1j86j86
1673A533O4O5J69J69n65J96K64k79J96j30q0K47n9n9P3k52J28J27k32L11j6j5Q3k43K47k98
1671A644noL41m20L62m00K87k57J08J08k31L12n8n8k4k5J43J42p5m01L08j9JKj44J82l54J89
1669A652j69L74k6k7m18J26M31l30p2K54j39j40J32J31LKk98K46J57j69K52n08K46q0J08J08
1667A846j57J69j70J55j30J96Ol20M6M7k0k0K86k57R4R4k04J21r1r1L10j6l53J91J30j96J8
1665A684J8J41m03K12K11j89L55l54k7K91k52Q7Q6n0n0J04k23J85l58O3O3QL35j79j78L18
1663A898rl12J3K58k85J77j49J16J16k21L23k81M5K35l08O6O6l26M34j57j56J76J75p5p5j67
1661A577J59k5k4J06J07k3k3k69K75k15J11P3P3o2o3k67K77NNj96L47k44Q2J01k25J62j63
1659A661L1L2J2J1P2P3j92j93K86m0j77J50p1p1K35r1jL25k52P4q6q6J6J6m2m2N9N9j54J71
1657A785j81j82N40mj26j26J84j43N4k72R4M19l75m9M3M2l8l9j74L69R0m52N3L79k66O1P8
1655A764P8k20J05qqqqJ04k21j20K07K58k86J21k04J85j42J84j41J39j88K07j20K45k99O8
1653A692O8J12J13l50J94L8k89L2L1K72k71L4L5J5J6j88J38J53j73L1L1M3M3k42Q4K21j04
1651A779r1r1J61J61q3q4n3n2M9M9q0K46k77M9J59j67MLK34l09J13J12Kl24P0P0n8K68n2n1
1648A757r2r1K3K4j90L54q8q8l4l3J22J23j36J90m00J42K40q7J92l51P2P2J8J7J42j84L39
1646B053o40M42J16j15j15K3K2KKO5k62J12J12m1m1o1o2K30r7J89j38PPr4r5Q6Q7K5l00J05
1644A624J05k41L02o0l87N03k58N3N4K5K6j42J83k0k0K06j21k83M77j28j29J90l53K55k88
1642A573K07l36J02J01O8O8M5M6l6l6n5n5K7K6j33j33L49K4k9k9J40J41j00j00j82L61m73
1640A581O9O3O3k23J04j28J99o6o6L6L6M8M7J4J4J70l75O8O7J20J20j58j59j18K09n7n7k1
1638A600k1L66j78k3k4K28l16L17qk33R4j07j08J04J03n5n5K51k92Q1Q1J49j77L2L2m9l76
1636A416K82K82m11L51k2k2k80K63qqn6n6L4L4J36j90j00r9nL21j43j42O8O8rrrrO4O3n1n2
1633A701p9K47Kl24J09J09L27m35O3O2J5J5LLp9p8J7J6o5o5K5K5Q7Q6Q5k40L91l70m2K84l41
1631A554j5p4M70m20J23Q1Q1k2k1k2k3K4K5k93M68k25k24L48K3r3r3J21J21j44j43J22k05
1629A544J36J36J45l97M3M4J30J30l12K32j25j24M5M5j1j0j80L64r2r2P8P8MMp8p7J05J06
1627A871j66L78l97J46L8k88K19j06N6N6r1r2P8P8N6k70L89l72L92j52j79J46R5k32K78k66
1625A665r5r5N04m76J89J89K6K6n6l81L04k1j60J67k00J26r5K31j63J62l28K16p0p0J9J8J9
1623A651J8J58J57K2K2k19k20k9K97j94J32J52j74o5o6P0P0j08K17o7o8K36r0k74K69j34J91
1621A954j14j14K36q9Q7k39J7J7P9P8n5n6n5n6N8N9n8n7L17k26k2k3Q8k38L33k11oom0m0Q2
1618A700Q3q8q7K75k68L7L7L6L6N6N6j72J53k9l0p0p1rL17k11k12L12k32M00l60j5L12j34
1616A822j34M3M3n1K75k61k61R8R9O5O5K72k72r5r5L95l65K45q0m8m8J3J3P3P3j37j37J58
1614A768j68J5J6K3K4K07j20P1P1j39j40Q2Q2j9k0N5k72J30j96j46L97r2K35k46Q0J07J07
1612A912j11j11j11j12K58K57m69K91L6L5n3n2J3J4ppJ57j69%L27m73P1K26l17J26J26o5o4
1610A728L0k95J53J52j92J33L1L2l2l1k15J11J7J6K27l17L46j98J08J08l40K04J43j84J18
1608A853k09J99j28L6k90K47p9PPJ09k17r5K32PPJ70j55K10j15j51j52K15K15j4l41Q8Q8J8
1606A762J8q4q4J93j33N0N1JJJ51l93K64o2L60m01j84L59K10l33k30L14ook03J23K1K1QPQ
1603A803Pr2r2J19J19l25KK25j00J51j75L5L5K29l14J75j52Q2Q2j21K04q8q8j9k0J96l47K44
1601A775q2j87J39j06K20J18k09J6J5j66J60N8N8Q2Q1q2q1o0n9J03J04j85j84K37r0K80k65
1599A690O9O9J91l52J37j90P6P6J57j69O1O1l06K0R4R5j50J77Q2Q3j69j69J72J73k49P8k80
1597A527K64kjk08J18m6m5q7K40N6N6p5p5j4j3K88l7l01K41k32R3K6K6k2k1j03K23k26J01
1595A751q2K43j2j2N0k77j2L14n2n3l13l14N69j91L14k28nnL30k14p0p1k7k7J36J37j20j19
1593A640M3M4N0N0j12K13k29R7R7k29K34r1k14J13Q0k46J22J21o2o3Q8k39L68j75j34J91m7
1591A710K78l20Pj4L12m08J35j90J35L12k31j10K17jjn5n5K71k73j06K20k02J25R4k32p6p5
1589A467O02j59l6l62J40J40rrk69K74j2j1j61J65KLk17J09Q9Q8lkJ60l84k2L04p6p6NNj31
1586A614J96l82L78J75j51k39Q6K30r7j02j02j57L87j33j32K81m4l08K35L58m03m4K83k94
1585A635L1M0M0j23K03RRj74J52J27k00k9k9K15l28J40J40j12j13N0N1o7o7M08l52J87l57
1582A486L36J0J99j28j28J99l77n2J46J46kl28J27J27K1K0k78M8L21k23K67k76l5K92k51P4
1580A741j22K04j23j22K84K84n03K57k39Q7j70J55J07k18j17K09klq5K42j71j71Q7Q7M5m99
1579A244P24l7o4o5J60l84L43k00K55p2j58j58J68j57O2O3k02J24p0K56j72J55j53j54K34
1577A742r2k5L02j88J38R0k35P0k56M0M1K0K0J5J5L6L5j70J56ppm4K82l91J53J28j97jjJ65
1574A834j62O9O9J58l85RL35l7l7k48P8k07L36o5o4L29k14n1n2p2K54P0k56J21k05J22J21
1572A850l5l5j4j5j56J71M8M9L7k89N8N7RQRQj12j12J59J60m1m1J02m42J64J64n4n4Q4k42
1570A495J05J04m1m1O2O1q2K45k24J02l3l59L13k30K00J99LKo7o7o7o7L5L5O9O9m27J16K66
1568A776o0m7m7J17J16k80M7M13n65K40K39k76N0p0p0p0K56M5M6j18j18J80j46K54n06M53
1566A859l08K97k46J43J44k57O9N3k72R4R5m1m1J42J43k11J15k31k31L45L45j44j45m5m6l10
1564A316M50m7m7%JK1K1j15K11l27M35j36j36J30J30l45j9K89l8r9K28j29j30L4L4J19k06
1562A645L8L8K9k97J25J25J90l54Q8M15m83K79N4k72R2R3l36M26k43Q4J11k14J64j62M8M9
1560A732L08k35R1k35J53J52k15J12j10j09k8k8J74j52J33j93J43J43o1o0J91j36Q9k37p8
1558A544K49J87l56k3k3J26k00R6R6R6R5k01J25n8n8O3O4k62K81J34j92j59J68j8j7r9K27
1556A885j91j90K31K31l52k5L61l99K73n3J02k23mmP8P7j74J51j95J31j70J57ppK6K5K5K5
1554A784j6j5j6j5ppJ57j70O5k62O5O4lmk4k4K92l4j97J29R3R3k13J14j90J35J49l94M77k83
1551A743n3n3J0J0j0j0L38J3m15J28L10k34j93J33L53j90j37j36J51J50j21j21K2K1JJK28
1549A939r8k60O5P3P3J14k13M3M2KJK41q5o5o4M1M0l06K1J15J16K0K0n09K51K1L46j37j36
1547A711M6M7r3r2K88l8l13K31J08k17n2K75r2r2M3M3K05l37j44J82j6j5k27R9K41q5J80j46
1545A740L8L7k14J12k13L29Q5Q5k27R8kjj99J27K19l24J85j41qpo2o1K91k52K37q8j9j9p3
1543A673p3L93j51k9k9J21k06m2m3J96j31N3N3J0J1N2k74pL20m7m6N3N3N4k73K62o4J8J8l1
1540A894l2p8p9L65l96K15j11L2L3m16L45J%J50j77O8O8O7k58QQK05j21l94J49P5P4J64j61
1538A698j42J85j70J55o2K64l22M39j32j31LMMMk7k7J36j90J80j47J6J6n9n9K47k96N5N5J83
1536A880j42Q2k44K99k7k97K45j01K26p2p2j74J53J39j86N1N1k61K82L03m58K13j13k41N18
1534B054j78j79K15j11l2l2J10k15K34r1j73L70n4l80p4K52L8L7q4q5j55J70J02J02k74K68
1532A835k47k48N46k16q6K40J53l91P9P8M5k82rL16p2p2K9L0j66j66M99m3O8k58k6k7L4L4
1530A677O8O8l55J88M6M6p4p4J09J10j22K05j63j62K34r3K3l03p6K50M7M6o9p0K97k9j08K19
1528A935j68j68K46q0l8l9j31J96J95j30p9p8R8R8l03K41K06l36K48k96j32M11l23K21k14
1526A580J12l0K96j38j39QPp4p4R0R0J92j34l3l2l52M10J07m35K10K10k83M3LLJ67j59K5K5
1524A695M5M5M5M5L2L1l35j0J68j59M5M5j49j50M28j15M2M2RQo2o3j65J61PPq2M62l85J58
1521A845k91K53J23m21K17j09l9N04j14j14R3k33L3k94L16rJ54l89L08k35K00j26J77j49J64
1520A864j63K73k71k92K52P8P9j94L50j45j46k4L03o3o3k87M73k70N6k83M2K70n6n0m9K97
1518A981k46N9N9j56j56K11j15j29J97j69J56j19K08J66l76K78m7J4l13J97J96M7M7l88J55
1516A757J3J3p5p4J36J35m88K71L13k31n3n3j08K18noooJ48j79J89j38l1l1j32J93k35R1P0
1513A696P1N5k71K79m6j58J69l6l5L1L1N2k75J1J1P2P2o6o5R7R8j55j54M02l58K68k75K47
1511A768p8N6N6L5L5m4m5m4m4l3l3R7R6O6m77K42K43l07K36k12L31p6p6o3o3J64j63O8O8l34
1509A469M26j64j65J05J04K3K3p3p2RJ0j32j32L1L2J35J34K0J9K29l15j25j25N40kp8p7J7
1507A866J7j26j26j10K15L45m16K39l04J37J37k84M2K05j20MLQ6Q5k00J27m4K82l45J99k77
1505A637K66l98J46m4m5R0Q9J72j55J13k12R3R3L8k89K22j05K96l0k68k68L02k3mlm2m3L9
1503A667L9M6M5k60K83l8l8l8l8K29l14J76j51J05J06k4l49L15j1j13K13j37j36K10j17J15
1501A785k12j5j5L56m06M10j34m9m8O0O0Ll22N8L85o0n9l9l9K9K9K9K9j65j64L65L9J04m40
1499A574K80k63K71k73k1L04j6j7j25j25L92l70P9P9k18J08P3k52L89j54j40M02m13J29j63
1497A530J64N4N5k10J16K26j00j06j07N14k48r1r1PPj3j3K78m7j36j36N8N7j05K21k46Q0J48
1495A866j77l07M53j4j5J14k11J76j50k11J14M0M0J83l61K71n5K23j02j03j02J57J57m55j28
1493A403M42l18J29J30M0L9j44J82j34j34N0M9M5M4j39J87q8q8O1O1J90l53j57L87m28J15
1491A571J70j57K73n2K46n15K19j07n2K73k79M8j4j3J46M72l64l7j69J57K8K8k54K89l01K42
1489A848j75J51k16J11J44l99J24M50k42k41K13j12J02k25O8O8L02k42O4O5k4k4j87J39q9
1487A673K37Pl20p0K56k9l0Q7Q7p6p6P2P2r1r2O3O3n3n2k26N35j99j99K42l01j6j6K28r8Q6
1484A764Q6M5M5O6k61L2L1L2L2J2L39o32J28j28J98j14M29l77L83k81k82Q1Q1K1K0j09K16
1482A857j50j51K12j15N5k71M23j22J5L41m91N2l01M59K09j18n0n0N3N2k74N2m3K84l48J95
1480A775Q3Q3j2j2l43K00p1p2k04L40N4k72J80J80k96L1O1O1J01k24LKJ65j60j1j2K74k69
1478A635p7p8M80k81J4J4J4J5J99l44M3M3L0K9j53J72J9J9L9L9m6m5m6m5j4j3J49J50j39j39
1476A683K07j18l1l1p1K54j15j16j16j16L43J7L7L7j29j29L60j84j01K24M1n02J92J93P0k56
1474A643m4m4L23k20J2J3J27j98K02l41M13j30M7M8j08K17o8l95K10K10j06K20j26j26j34
1472A645j35j00j00O02j60lmK9K8j56J71k6k6J77j48j74j74J86J86p1p2K33l09J08J09q8q8
1470A640P5P5j70J57j88J38N7N7M1M2k24J03P3P2k53P3j4j3j36M07q6q6k55P0J96j30j09K16
1468A828o4o5L84l77N1N1L7L7k78K65k0k1k03J22J36J36m57Q7K36r0m7m8J4l12L55K9p9q0
1466A627P7P7k08L35k30R6K19l25k36N24k09k10R9R8p2p1K98k45O1O1m6m6L5L5j5j6L2L2K71
1464B048k72k71K71p2p1P8P8J71j55M9M9k85M0O1k65O12l67J02J02k51P5K8K7K2K3Q3m60K12
1461A662K13K53n07J83J83j22m49L87j56ppJ08J08k99K45J3l13K38K37n6l83rj0J34J33L9
1459A818k88K95k49J72J73j44j43Q1Q1k06L38j92j91rL18j85J41l6l5O6k59p5M69k31k31K33
1457A711r2N6N7K57k86L9M0j77J49j36J90ppL4L4k26J01J07J07j85j85Q0Q0j22K04k85K58
1455A796K9L0L5k90K35r2j0j0P4P5o1o1N8N9k06J19K8K8l3l3k8k9j51L93m54L06R5k30J18
1453A790J18j12j13P0k57K25j00K25j00N6k70J44J44j2j2P0O9k15J10l11K33n3n3M5M6O5O6
1451A868k64O3J77j48j45L97j66j66M77k83j00j00R0R0j28J98K29l14r0r1K00j27J04J04k71
1449A604M89k37k37J82J82l55k9J89J88L3n11K75n1j66J59j64j65J34J35j73L70l42M18j65
1447A763J62n6l82L15j2R1k36P8P9L29m31J46j81J39j88J02J01k18J08K68k74P1P2j36J90
1445A900k57O8n9n8M17R1k16k16P6k50M41j03j09j09J68j59NMJ87j40J46J46l69m2J54J54
1443A870q5q5q5M58l77J66j53j53L90l71K61o5j90J35q9q9K56p0K56k88j17j18M60l01j76
1442A440J50J91l52M51r2k90K54P3P3k46K98l94J49L06m55O4O3j20K06k37N24l39j3L8L8p1
1440A709p1K95m66J04J04J46j80j79J46Q3Q4M2M3j02K25j56j56L48j95K2l03O2O3M3M2n6n6
1438A641J07J07r6r6M7M6J32j94l2l1L08j8k89L6J1J1J68j59k43L00k5k5K2K2l25M37j78j77
1435A507M47r6j69j69K65k78J50J49o8o8J76j49J3J3J95j32N2N2j52j52J20J20J%r4M49n83
1433A599J78J30j96j1j1J11J12N0k76n8n8L91l69j86L58J18k07K9L0L59o19K50K50m88K72
1431A758j90L54j52j53J33J33R6k30k7k7p3K52k02k03M7M7J89J90m53N25k09J18q5q5o4o4
1429A625q4q4M60l02K49n12K70K69k27R8J33j93k96K48N1N1K39l05JJo9o9R5R4k9k9L2L3N7
1427A807k68N06k55llk07N53k04k03K71m89K07K08k96L1J7J7L7L7o7o7K0L47q9r0j50j51K49
1425A765K48j32j32l0l0P2k54J34J34J01k26K68k75K08K07l91J52k5k4K33l10J7J6j21K04
1423A809j41J84j33J93n2n2J26J26l30lK9K9M9N0n5n5n5n5Q7Q8j84j85J52J51j2j2m9m9K57
1421A908k87n9n8K13K13m22J22jjm3K83j72j73M2M2K45q0k20J05q4K42k43L01o5o6N7N6j40
1419A715j41M49r4k24J02j36J89k45k45K03K03R5k32L75N0l86J59P3k53j5j5q1K46j22j21
1417A549K97l0O6k61J17J18o6o6N4N5k7k7k4k3k3k4m9m8J14k12J96j29K17j09P1P1N0N1j92
1415A716j91K63o2k7k7j70L74j67J59J12k15J03J04l86J57m4m5j0j0J12J12n1n1L7L7k68K75
1413A837q5q5K54k88J31J32o6o5k0j9O2O2j8j8j8j7j3j3j3j2L1L1j32J94j73J54j0j0j3j3
1410A787l3l4J50j76QPOOOPJJJJP2P3j0rj41j42n3K73l8l7J05k20m6K80R7k29mlJ26k01J94
1408A825l50K08K07j4j4K0J9k07L36l17J0P3P3k53P3p3p3K32l11K72n5K17l27L7k89M58q6
1406A691j83J44Q9Q9lkj86J40n4n3J51J50m09q4K97l0r4r4J58J57r4r4r4K32q4K43k47P9k52
1403A563P4qpN1N2N2N2j18j18K29r8l3l3K8K8L4L3L3L3m3m3m3m3N8N9P9k47J00J00q3q4L9
1401A696L9L9L9k1k1k0k1M6M5l00K5J14J15j30J96n6n5O7O6k75N1K48p9k72K72j57J70l5l4
1399A752j5j4j3j2m7m6K23l19K58K57k34k35N1L76l9l66L40J5l88L73k66K78m51R2J40J39
[truncated: 3,594,951 more chars]
