# Supplementary material for: Improving the accuracy of model-based quantitative nuclear magnetic resonance
Source: Magn Reson (Gott). 2020 Jul 2;1(2):141–53. doi: 10.5194/mr-1-141-2020 (PMC10500698; doi:10.5194/mr-1-141-2020)
Supplement: The supplement related to this article is available online at: https://doi.org/10.5194/mr-1-141-2020-supplement. [file mr-1-141-supplement.zip › OrganicMixtures_HF.jdx]

##TITLE=	OrganicMixtures-Flow_qGSD
##JCAMP-DX=	6.0	$$ MestReNova 14.0.1-23559
##DATA TYPE=	LINK
##BLOCK_ID=	1
##BLOCKS=	22   
##ORIGIN=	Mestrelab Research S.L.
##OWNER=	yma80
##$MNOVA/LINK_BLOCK_TYPE=	DOCUMENT
##TITLE=	20190321 Organic Mixtures Sample 01.11.fid
zgig30
Organic Mixture
Sample-1	EtAc	MeAc	EtOH	MeOH
mol/mol	0.25	0.25	0.25	0.25 
25C
PW30, NS16
21/03/2019 
##JCAMP-DX=	6.0	$$ MestReNova 14.0.1-23559
##DATA TYPE=	LINK
##BLOCK_ID=	2
##BLOCKS=	1    
##ORIGIN=	Mestrelab Research S.L.
##OWNER=	yma80
##$MNOVA/LINK_BLOCK_TYPE=	PAGE
##TITLE=	20190321 Organic Mixtures Sample 01.11.fid
zgig30
Organic Mixture
Sample-1	EtAc	MeAc	EtOH	MeOH
mol/mol	0.25	0.25	0.25	0.25 
25C
PW30, NS16
21/03/2019 
##JCAMP-DX=	6.0	$$ MestReNova 14.0.1-23559
##DATA TYPE=	LINK
##BLOCK_ID=	3
##BLOCKS=	2    
##ORIGIN=	Mestrelab Research S.L.
##OWNER=	yma80
##$MNOVA/LINK_BLOCK_TYPE=	ITEM	$$ NMR Spectrum
##$MNOVA/ITEM/POLYGON=	(XY..XY)
5321,5835
8722,5835
8722,8208
5321,8208
5321,5835
##$MNOVA/ITEM/Z=	0
##$MNOVA/ITEM/ANGLE=	0
##TITLE=	20190321 Organic Mixtures Sample 01.11.fid
##JCAMP-DX=	6.0	$$ MestReNova 14.0.1-23559
##BLOCK_ID=	4
##DATA TYPE=	NMR SPECTRUM
##DATA CLASS=	XYDATA
##NUMDIM=	1
##ORIGIN=	Bruker BioSpin GmbH
##OWNER=	nmrsu
##.OBSERVE FREQUENCY=	400.13120039000000361
##.OBSERVE NUCLEUS=	^1H
##.SOLVENT NAME=	D2O
##.PULSE SEQUENCE=	zgig30
##LONGDATE=	2019/03/21 22:56:39.000
##.ACQUISITIONMODE=	SIMULTANEOUS (DQD)
##$ORIGINAL FORMAT=	Bruker XWIN-NMR
##$MNOVA/SCALES_VERSION=	7
##$PARAMETER FILE=	(acqus, ASCII, c:/Users/yma80/Data/OrganicMixtures/20190321%20Organic%20Mixtures%20-Flow/20190321%20Organic%20Mixtures%20Sample%2001/11/acqus, 0)
$$ ##TITLE= Parameter file, TOPSPIN		Version 3.2
$$ ##JCAMPDX= 5.0
$$ ##DATATYPE= Parameter Values
$$ ##NPOINTS= 9	$$ modification sequence number
$$ ##ORIGIN= Bruker BioSpin GmbH
$$ ##OWNER= nmrsu
$$ $$ 2019-03-21 10:56:40.528 +0100  nmrsu@nmrflow
$$ $$ C:/Bruker/TopSpin3.2/data/Ellen/20190307 Organic Mixtures Sample1/11/acqus
$$ $$ process C:\Bruker\TopSpin3.2\prog\mod\go.exe
$$ ##$ACQT0= -2.34033620658041
$$ ##$AMP= (0..31)
$$ 100 100 100 100 100 100 100 100 100 100 100 100 100 100 100 100 100 100
$$ 100 100 100 100 100 100 100 100 100 100 100 100 100 100
$$ ##$AMPCOIL= (0..19)
$$ 0 0 0 0 0 0 0 0 0 0 0 0 0 0 0 0 0 0 0 0
$$ ##$ANAVPT= -1
$$ ##$AQSEQ= 0
$$ ##$AQ_mod= 3
$$ ##$AUNM= <au_zg>
$$ ##$AUTOPOS= <>
$$ ##$BF1= 400.13
$$ ##$BF2= 100.612769
$$ ##$BF3= 400.13
$$ ##$BF4= 400.13
$$ ##$BF5= 400.13
$$ ##$BF6= 400.13
$$ ##$BF7= 400.13
$$ ##$BF8= 400.13
$$ ##$BYTORDA= 0
$$ ##$CAGPARS= (0..11)
$$ 0 0 0 0 0 0 0 0 0 0 0 0
$$ ##$CFDGTYP= 0
$$ ##$CFRGTYP= 9
$$ ##$CHEMSTR= <none>
$$ ##$CNST= (0..63)
$$ 1 1 1 1 1 1 1 1 1 1 1 1 1 1 1 1 1 1 1 1 1 1 1 1 1 1 1 1 1 1 1 1 1 1 1 1
$$ 1 1 1 1 1 1 1 1 1 1 1 1 1 1 1 1 1 1 1 1 1 1 1 1 1 1 1 1
$$ ##$CPDPRG= (0..8)
$$ <> <> <waltz16> <> <> <> <> <> <>
$$ ##$D= (0..63)
$$ 0 30 0 0 0 0 0 0 0 0 0 0.03 0 0 0 0 0.0002 0 0 0 0 0 0 0 0 0 0 0 0 0 0
$$ 0 0 0 0 0 0 0 0 0 0 0 0 0 0 0 0 0 0 0 0 0 0 0 0 0 0 0 0 0 0 0 0 0
$$ ##$DATE= 1553162199
$$ ##$DE= 6.5
$$ ##$DECBNUC= <off>
$$ ##$DECIM= 5000
$$ ##$DECNUC= <off>
$$ ##$DECSTAT= 4
$$ ##$DIGMOD= 1
$$ ##$DIGTYP= 12
$$ ##$DQDMODE= 0
$$ ##$DR= 23
$$ ##$DS= 0
$$ ##$DSPFIRM= 0
$$ ##$DSPFVS= 20
$$ ##$DTYPA= 0
$$ ##$EXP= <JB_1H_13Cig>
$$ ##$F1LIST= <>
$$ ##$F2LIST= <>
$$ ##$F3LIST= <>
$$ ##$FCUCHAN= (0..9)
$$ 0 2 1 0 0 0 0 0 0 0
$$ ##$FL1= 0
$$ ##$FL2= 0
$$ ##$FL3= 0
$$ ##$FL4= 0
$$ ##$FOV= 0
$$ ##$FQ1LIST= <>
$$ ##$FQ2LIST= <>
$$ ##$FQ3LIST= <>
$$ ##$FQ4LIST= <>
$$ ##$FQ5LIST= <>
$$ ##$FQ6LIST= <>
$$ ##$FQ7LIST= <>
$$ ##$FQ8LIST= <>
$$ ##$FRQLO3= 10401.1725000143
$$ ##$FRQLO3N= 3
$$ ##$FS= (0..7)
$$ 83 83 83 83 83 83 83 83
$$ ##$FTLPGN= 0
$$ ##$FW= 125000
$$ ##$FnMODE= 0
$$ ##$FnTYPE= 0
$$ ##$GPNAM= (0..31)
$$ <> <> <> <> <> <> <> <> <> <> <> <> <> <> <> <> <> <> <> <> <> <> <> <>
$$ <> <> <> <> <> <> <> <>
$$ ##$GPX= (0..31)
$$ 0 0 0 0 0 0 0 0 0 0 0 0 0 0 0 0 0 0 0 0 0 0 0 0 0 0 0 0 0 0 0 0
$$ ##$GPY= (0..31)
$$ 0 0 0 0 0 0 0 0 0 0 0 0 0 0 0 0 0 0 0 0 0 0 0 0 0 0 0 0 0 0 0 0
$$ ##$GPZ= (0..31)
$$ 0 0 0 0 0 0 0 0 0 0 0 0 0 0 0 0 0 0 0 0 0 0 0 0 0 0 0 0 0 0 0 0
$$ ##$GRDPROG= <>
$$ ##$GRPDLY= 67.9851226806641
$$ ##$HDDUTY= 20
$$ ##$HDRATE= 1
$$ ##$HGAIN= (0..3)
$$ 0 0 0 0
$$ ##$HL1= 0
$$ ##$HL2= 0
$$ ##$HL3= 0
$$ ##$HL4= 0
$$ ##$HOLDER= 0
$$ ##$HPMOD= (0..7)
$$ 0 0 0 0 0 0 0 0
$$ ##$HPPRGN= 0
$$ ##$IN= (0..63)
$$ 0 0 0 0 0 0 0 0 0 0 0 0 0 0 0 0 0 0 0 0 0 0 0 0 0 0 0 0 0 0 0 0 0 0 0 0
$$ 0 0 0 0 0 0 0 0 0 0 0 0 0 0 0 0 0 0 0 0 0 0 0 0 0 0 0 0
$$ ##$INF= (0..7)
$$ 0 0 0 0 0 0 0 0
$$ ##$INP= (0..63)
$$ 0 0 0 0 0 0 0 0 0 0 0 0 0 0 0 0 0 0 0 0 0 0 0 0 0 0 0 0 0 0 0 0 0 0 0 0
$$ 0 0 0 0 0 0 0 0 0 0 0 0 0 0 0 0 0 0 0 0 0 0 0 0 0 0 0 0
$$ ##$INSTRUM= <spect>
$$ ##$L= (0..31)
$$ 1 1 1 1 1 1 1 1 1 1 1 1 1 1 1 1 1 1 1 1 1 1 1 1 1 1 1 1 1 1 1 1
$$ ##$LFILTER= -1
$$ ##$LGAIN= -1
$$ ##$LINPSTP= 0
$$ ##$LOCKED= no
$$ ##$LOCKFLD= -1
$$ ##$LOCKGN= -1
$$ ##$LOCKPOW= -1
$$ ##$LOCKPPM= -1
$$ ##$LOCNUC= <off>
$$ ##$LOCPHAS= -1
$$ ##$LOCSHFT= no
$$ ##$LOCSW= 0
$$ ##$LTIME= -1
$$ ##$MASR= 4200
$$ ##$MASRLST= <masrlst>
$$ ##$MULEXPNO= (0..15)
$$ 0 0 0 0 0 0 0 0 0 0 0 0 0 0 0 0
$$ ##$NBL= 1
$$ ##$NC= -7
$$ ##$NLOGCH= 2
$$ ##$NOVFLW= 0
$$ ##$NS= 16
$$ ##$NUC1= <1H>
$$ ##$NUC2= <13C>
$$ ##$NUC3= <off>
$$ ##$NUC4= <off>
$$ ##$NUC5= <off>
$$ ##$NUC6= <off>
$$ ##$NUC7= <off>
$$ ##$NUC8= <off>
$$ ##$NUCLEUS= <off>
$$ ##$NUSLIST= <automatic>
$$ ##$NusAMOUNT= 25
$$ ##$NusFPNZ= no
$$ ##$NusJSP= 0
$$ ##$NusSEED= 54321
$$ ##$NusT2= 1
$$ ##$NusTD= 0
$$ ##$O1= 1200.39
$$ ##$O2= 10060.3
$$ ##$O3= 10061.28
$$ ##$O4= 10061.28
$$ ##$O5= 10061.28
$$ ##$O6= 10061.28
$$ ##$O7= 10061.28
$$ ##$O8= 10061.28
$$ ##$OVERFLW= 0
$$ ##$P= (0..63)
$$ 11.14 11.14 22.28 9.2 18.4 17.16 26 52 20000 26 52 80000 80000 1000 500
$$ 0 1000 2500 100000 600 2500 0 0 0 2000 126 100000 11.14 1000 1000 0 1900
$$ 20000 0 0 0 40000 0 0 240 2000 0 0 4500 300 0 80000 0 0 0 0 0 0 0 0 0 0
$$ 0 0 0 0 0 0 1500
$$ ##$PACOIL= (0..15)
$$ 0 0 0 0 0 0 0 0 0 0 0 0 0 0 0 0
$$ ##$PAPS= 0
$$ ##$PARMODE= 0
$$ ##$PCPD= (0..9)
$$ 0 90 80 0 0 0 0 0 0 0
$$ ##$PEXSEL= (0..9)
$$ 1 1 1 1 1 1 1 1 1 1
$$ ##$PHCOR= (0..31)
$$ 0 0 0 0 0 0 0 0 0 0 0 0 0 0 0 0 0 0 0 0 0 0 0 0 0 0 0 0 0 0 0 0
$$ ##$PHLIST= <>
$$ ##$PHP= 2
$$ ##$PH_ref= 0
$$ ##$PL= (0..63)
$$ 120 120 120 120 120 120 120 120 120 120 120 120 120 120 120 120 120 120
$$ 120 120 120 120 120 120 120 120 120 120 120 120 120 120 120 120 120 120
$$ 120 120 120 120 120 120 120 120 120 120 120 120 120 120 120 120 120 120
$$ 120 120 120 120 120 120 120 120 120 120
$$ ##$PLSTEP= 0.1
$$ ##$PLSTRT= -6
$$ ##$PLW= (0..63)
$$ 0 15 55 0 0 0 0 0 0 7.4521e-005 2.7559 0.15397 0.72737 0.3582 0 6.8864
$$ 0 0 15 0.23 0 0.074483 0 0 0.0082759 0.61148 0 0.46939 0 2.7559 0.72737
$$ 2.9095 2.9808e-006 0 0 0 0 0 0 0 0 0 0 0 0 0 0 0 0 0 0 0 0 0 0 0 0 0 0
$$ 0 0 0 0 0
$$ ##$PLWMAX= (0..7)
$$ 73.8 342.6 0 0 0 0 0 0
$$ ##$POWMOD= 0
$$ ##$PQPHASE= 0
$$ ##$PQSCALE= 1
$$ ##$PR= 1
$$ ##$PRECHAN= (0..15)
$$ -1 2 -1 0 1 -1 -1 -1 -1 -1 -1 -1 -1 -1 -1 -1
$$ ##$PRGAIN= 0
$$ ##$PROBHD= <5 mm PABBO BB/19F-1H/D Z-GRD Z108618/0749
$$ >
$$ ##$PULPROG= <zgig30>
$$ ##$PW= 0
$$ ##$PYNM= <>
$$ ##$QNP= 0
$$ ##$RD= 0
$$ ##$RECCHAN= (0..15)
$$ 0 2 0 0 0 0 0 0 0 0 0 0 0 0 0 0
$$ ##$RECPH= 0
$$ ##$RECPRE= (0..15)
$$ 0 0 -1 -1 -1 -1 -1 -1 -1 -1 -1 -1 -1 -1 -1 -1
$$ ##$RECPRFX= (0..15)
$$ 1 0 0 0 0 0 0 0 0 0 0 0 0 0 0 0
$$ ##$RECSEL= (0..15)
$$ 0 0 1 0 0 0 0 0 0 0 0 0 0 0 0 0
$$ ##$RG= 5.17
$$ ##$RO= 0
$$ ##$ROUTWD1= (0..23)
$$ 1 2 2 2 2 2 2 2 0 0 0 1 0 0 0 1 0 0 0 0 0 0 0 0
$$ ##$ROUTWD2= (0..23)
$$ 1 2 2 2 2 2 2 2 0 0 0 0 0 0 0 0 0 0 0 0 0 0 0 0
$$ ##$RSEL= (0..15)
$$ 0 1 2 0 0 0 0 0 0 0 0 0 0 0 0 0
$$ ##$S= (0..7)
$$ 83 83 83 83 83 83 83 83
$$ ##$SELREC= (0..9)
$$ 0 0 0 0 0 0 0 0 0 0
$$ ##$SFO1= 400.13120039
$$ ##$SFO2= 100.6228293
$$ ##$SFO3= 400.14006128
$$ ##$SFO4= 400.14006128
$$ ##$SFO5= 400.14006128
$$ ##$SFO6= 400.14006128
$$ ##$SFO7= 400.14006128
$$ ##$SFO8= 400.14006128
$$ ##$SOLVENT= <D2O>
$$ ##$SOLVOLD= <off>
$$ ##$SP= (0..63)
$$ 120 120 120 120 120 120 120 120 120 120 120 120 120 120 120 120 120 120
$$ 120 120 120 120 120 120 120 120 120 120 120 120 120 120 120 120 120 120
$$ 120 120 120 120 120 120 120 120 120 120 120 120 120 120 120 120 120 120
$$ 120 120 120 120 120 120 120 120 120 120
$$ ##$SPECTR= 0
$$ ##$SPINCNT= 0
$$ ##$SPNAM= (0..63)
$$ <> <Gaus1_270.1000> <Gaus1_180r.1000> <Crp60,0.5,20.1> <Bip720,100,10.1>
$$ <Squa100.1000> <Squa100.1000> <Crp60comp.4> <Squa100.1000> <> <Squa100.1000>
$$ <Squa100.1000> <> <> <Crp32,1.5,20.2> <> <> <> <Crp60_xfilt.2> <Sinc1.1000>
$$ <Sinc1.1000> <Sinc1.1000> <Sinc1.1000> <> <> <> <Q3.1000> <> <> <Crp60,20,20.10>
$$ <Bip720,50,20.1> <Crp32,1.5,20.2> <Q3.1000> <> <Gaus1_180r.1000> <> <>
$$ <> <> <> <> <> <> <> <> <> <> <> <> <> <> <> <> <> <> <> <> <> <> <> <>
$$ <> <> <>
$$ ##$SPOAL= (0..63)
$$ 0.5 1 0.5 0.5 0.5 0.5 0.5 0.5 0.5 0.5 0.5 0.5 0.5 0.5 0.5 0.5 0.5 0.5 0.5
$$ 1 1 1 1 0.5 0.5 0.5 0.5 0.5 0.5 0.5 0.5 0.5 0.5 0.5 0.5 0.5 0.5 0.5 0.5
$$ 0.5 0.5 0.5 0.5 0.5 0.5 0.5 0.5 0.5 0.5 0.5 0.5 0.5 0.5 0.5 0.5 0.5 0.5
$$ 0.5 0.5 0.5 0.5 0.5 0.5 0.5
$$ ##$SPOFFS= (0..63)
$$ 0 0 0 0 0 0 0 0 0 0 0 0 0 0 0 0 0 0 0 0 0 0 0 0 0 0 0 0 0 0 0 0 0 0 0 0
$$ 0 0 0 0 0 0 0 0 0 0 0 0 0 0 0 0 0 0 0 0 0 0 0 0 0 0 0 0
$$ ##$SPPEX= (0..63)
$$ 0 0 0 0 0 0 0 0 0 0 0 0 0 0 0 0 0 0 0 0 0 0 0 0 0 0 0 0 0 0 0 0 0 0 0 0
$$ 0 0 0 0 0 0 0 0 0 0 0 0 0 0 0 0 0 0 0 0 0 0 0 0 0 0 0 0
$$ ##$SPW= (0..63)
$$ 0 1.5466e-005 6.8738e-006 7.1126 5.1724 0.001863 7.4521e-005 7.1126 1.863e-007
$$ 0 0.001863 0.001863 0 0 3.0347 0 0 0 1.7043 1.097231e-005 1.70561e-005
$$ 7.96399e-006 4.294914e-005 0 0 0 0.00050719 0 0 0.071162 1.3248 0.75868
$$ 0.040074 0 6.8738e-006 0 0 0 0 0 0 0 0 0 0 0 0 0 0 0 0 0 0 0 0 0 0 0 0
$$ 0 0 0 0 0
$$ ##$SUBNAM= (0..9)
$$ <> <> <> <> <> <> <> <> <> <>
$$ ##$SW= 9.99672106574363
$$ ##$SWIBOX= (0..19)
$$ 0 1 3 0 0 0 0 0 0 0 0 0 0 0 0 0 0 0 0 0
$$ ##$SW_h= 4000
$$ ##$SWfinal= 0
$$ ##$TD= 39998
$$ ##$TD0= 1
$$ ##$TE= 298.1399
$$ ##$TE1= 298.415
$$ ##$TE2= 0
$$ ##$TE3= 0
$$ ##$TE4= 0
$$ ##$TEG= 300
$$ ##$TE_PIDX= 1
$$ ##$TE_STAB= (0..9)
$$ 1 1 0 0 0 0 0 0 0 0
$$ ##$TL= (0..7)
$$ 120 120 120 120 120 120 120 120
$$ ##$TUNHIN= 0
$$ ##$TUNHOUT= 0
$$ ##$TUNXOUT= 0
$$ ##$USERA1= <>
$$ ##$USERA2= <>
$$ ##$USERA3= <>
$$ ##$USERA4= <>
$$ ##$USERA5= <>
$$ ##$V9= 5
$$ ##$VALIST= <>
$$ ##$VCLIST= <>
$$ ##$VD= 0
$$ ##$VDLIST= <>
$$ ##$VPLIST= <>
$$ ##$VTLIST= <>
$$ ##$WBST= 1024
$$ ##$WBSW= 4
$$ ##$XGAIN= (0..3)
$$ 0 0 0 0
$$ ##$XL= 0
$$ ##$YL= 0
$$ ##$YMAX_a= 13393149
$$ ##$YMIN_a= -11377375
$$ ##$ZGOPTNS= <>
$$ ##$ZL1= 120
$$ ##$ZL2= 120
$$ ##$ZL3= 120
$$ ##$ZL4= 120
$$ ##END=
$$ 
##$PARAMETER FILE=	(audita.txt, ASCII, c:/Users/yma80/Data/OrganicMixtures/20190321%20Organic%20Mixtures%20-Flow/20190321%20Organic%20Mixtures%20Sample%2001/11/audita.txt, 0)
$$ ##TITLE= Audit trail, TOPSPIN		Version 3.2
$$ ##JCAMPDX= 5.01
$$ ##ORIGIN= Bruker BioSpin GmbH
$$ ##OWNER= nmrsu
$$ $$ C:/Bruker/TopSpin3.2/data/Ellen/20190307 Organic Mixtures Sample1/11/audita.txt
$$ ##AUDIT TRAIL=  $$ (NUMBER, WHEN, WHO, WHERE, PROCESS, VERSION, WHAT)
$$ (   1,<2019-03-21 10:56:40.518 +0100>,<nmrsu>,<nmrflow>,<go>,<TOPSPIN 3.2>,
$$       <created by zg
$$ 	started at 2019-03-21 10:47:18.047 +0100,
$$ 	POWCHK enabled, PULCHK disabled,
$$        configuration hash MD5:
$$        9B F7 DB 0B 5A 9E A5 38 09 D8 B6 1B 74 3C 82 68
$$        data hash MD5: 39998
$$        BD 60 86 2B 36 7F 02 93 3D A5 9E 93 AA 85 EA DC>)
$$ ##END=
$$ 
$$ $$ hash MD5
$$ $$ A5 41 97 2F B1 90 D4 95 74 A8 50 04 39 55 23 65
$$ 
##$PARAMETER FILE=	(auditp.txt, ASCII, c:/Users/yma80/Data/OrganicMixtures/20190321%20Organic%20Mixtures%20-Flow/20190321%20Organic%20Mixtures%20Sample%2001/11/pdata/1/auditp.txt, 0)
$$ ##TITLE= Audit trail, TOPSPIN		Version 3.2
$$ ##JCAMPDX= 5.01
$$ ##ORIGIN= Bruker BioSpin GmbH
$$ ##OWNER= nmrsu
$$ $$ C:/Bruker/TopSpin3.2/data/Ellen/20190307 Organic Mixtures Sample1/11/pdata/1/auditp.txt
$$ ##AUDIT TRAIL=  $$ (NUMBER, WHEN, WHO, WHERE, PROCESS, VERSION, WHAT)
$$ (   1,<2019-03-21 10:56:40.518 +0100>,<nmrsu>,<nmrflow>,<go>,<TOPSPIN 3.2>,
$$       <created by zg
$$ 	started at 2019-03-21 10:47:18.047 +0100,
$$ 	POWCHK enabled, PULCHK disabled,
$$        configuration hash MD5:
$$        9B F7 DB 0B 5A 9E A5 38 09 D8 B6 1B 74 3C 82 68
$$        data hash MD5: 39998
$$        BD 60 86 2B 36 7F 02 93 3D A5 9E 93 AA 85 EA DC>)
$$ (   2,<2019-03-21 10:56:41.904 +0100>,<nmrsu>,<nmrflow>,<proc1d>,<TOPSPIN 3.2>,
$$       <Start of raw data processing
$$        ft FT_mod = 6 PKNL = 1 SI = 32K 
$$        data hash MD5: 32K
$$        CC F4 28 B7 CE 67 FB 7A 30 A8 2E 79 BD 55 3B 35>)
$$ (   3,<2019-03-21 10:56:43.374 +0100>,<nmrsu>,<nmrflow>,<proc1d>,<TOPSPIN 3.2>,
$$       <apk0 
$$        data hash MD5: 32K
$$        87 63 9B 8A B0 CF 88 27 94 54 7C 18 24 59 6B 7D>)
$$ (   4,<2019-03-21 10:57:13.703 +0100>,<nmrsu>,<nmrflow>,<audit>,<TOPSPIN 3.2>,
$$       <user comment:
$$        TITLE=zgig30
$$        Organic Mixture
$$        Sample-1	
$$        EtAc	MeAc	EtOH	MeOH
$$        0.25 	0.25	0.25	0.25 mol/mol
$$        25C
$$        21/03/2019TITLE_END
$$        data hash MD5: 32K
$$        87 63 9B 8A B0 CF 88 27 94 54 7C 18 24 59 6B 7D>)
$$ (   5,<2019-03-21 10:58:47.439 +0100>,<nmrsu>,<nmrflow>,<audit>,<TOPSPIN 3.2>,
$$       <user comment:
$$        TITLE=zgig30
$$        Organic Mixture
$$        Sample-1	EtAc	MeAc	EtOH	MeOH
$$        mol/mol	0.25	0.25	0.25	0.25 
$$        25C
$$        PW30, NS16
$$        21/03/2019TITLE_END
$$        data hash MD5: 32K
$$        87 63 9B 8A B0 CF 88 27 94 54 7C 18 24 59 6B 7D>)
$$ ##END=
$$ 
$$ $$ hash MD5
$$ $$ CC CC 34 D7 DB 80 09 C9 0B 97 78 66 C5 52 99 88
$$ 
##$PARAMETER FILE=	(cpdprg2, ASCII, c:/Users/yma80/Data/OrganicMixtures/20190321%20Organic%20Mixtures%20-Flow/20190321%20Organic%20Mixtures%20Sample%2001/11/cpdprg2, 0)
$$ 1 pcpd*3:180
$$   pcpd*4:0
$$   pcpd*2:180
$$   pcpd*3:0
$$   pcpd  :180
$$   pcpd*2:0
$$   pcpd*4:180
$$   pcpd*2:0
$$   pcpd*3:180
$$ 2 pcpd*3:0
$$   pcpd*4:180
$$   pcpd*2:0
$$   pcpd*3:180
$$   pcpd  :0
$$   pcpd*2:180
$$   pcpd*4:0
$$   pcpd*2:180
$$   pcpd*3:0
$$   lo to 2 times 2
$$ 3 pcpd*3:180
$$   pcpd*4:0
$$   pcpd*2:180
$$   pcpd*3:0
$$   pcpd  :180
$$   pcpd*2:0
$$   pcpd*4:180
$$   pcpd*2:0
$$   pcpd*3:180
$$   jump to 1
$$ 
##$PARAMETER FILE=	(datafile, ASCII, c:/Users/yma80/Data/OrganicMixtures/20190321%20Organic%20Mixtures%20-Flow/20190321%20Organic%20Mixtures%20Sample%2001/11/fid, 0)
$$ 
##$PARAMETER FILE=	(format.temp, ASCII, c:/Users/yma80/Data/OrganicMixtures/20190321%20Organic%20Mixtures%20-Flow/20190321%20Organic%20Mixtures%20Sample%2001/11/format.temp, 0)
$$ EDIT_PAR COMMAND FILE
$$ 
$$ DI_MODE         LONG
$$ ED_ENTRY        ACQU
$$ ORDER           FILE
$$ 
$$ 
$$ HEADER		"F2 - Acquisition Parameters"
$$ T_NAME		Date_
$$ 		TYPE	R64
$$ 		CLASS	ACQU
$$ 		SUBRANGE 0.0 50000000
$$ 		REL	"Date_=itodate(DATE)"
$$ 		INV_REL	"DATE=datetoi(Date_,DATE)"
$$ 		FORMAT	"%14.0f"
$$ 		TEXT	" "
$$ END
$$ T_NAME		Time
$$ 		TYPE	R32
$$ 		CLASS	ACQU
$$ 		SUBRANGE 0.0 1000000
$$ 		REL	"Time=itotime(DATE)"
$$ 		INV_REL	"DATE=timetoi(Time,DATE)"
$$ 		FORMAT	"%14.2f"
$$ 		TEXT	" "
$$ END
$$ NAME		INSTRUM
$$ 		TEXT	" "
$$ END
$$ NAME		PROBHD
$$ 		FORMAT	"%14.14s"
$$ 		TEXT	" "
$$ END
$$ NAME		PULPROG
$$ 		TEXT	" "
$$ END
$$ NAME		TD
$$ 		TEXT	" "
$$ END
$$ NAME		SOLVENT
$$ 		TEXT	" "
$$ END
$$ NAME		NS
$$ 		TEXT	" "
$$ END
$$ NAME		DS
$$ 		TEXT	" "
$$ END
$$ T_NAME		SWH
$$ 		TYPE	R32
$$ 		CLASS	ACQU
$$ 		SUBRANGE 0.0 1e8
$$ 		REL	"SWH=SW*SFO1"
$$ 		INV_REL "SW=SWH/SFO1"
$$ 		UNIT	"Hz"
$$ 		FORMAT	"%14.3f Hz"
$$ 		TEXT	" "
$$ END
$$ T_NAME          FIDRES
$$                 TYPE    R32
$$                 CLASS   ACQU
$$                 SUBRANGE 0.0 100000
$$                 REL     "FIDRES=SW*SFO1/TD"
$$                 INV_REL "TD = nextpow(SW*SFO1/FIDRES)"
$$ 		UNIT	"Hz"
$$ 		FORMAT	"%14.6f Hz"
$$ 		TEXT	" "
$$ END
$$ T_NAME          AQ
$$ 		TYPE	R32
$$ 		CLASS	ACQU
$$ 		SUBRANGE 0.0 1000
$$ 		REL	"AQ=aqcalc(SW,SFO1,TD,DIGTYP)"
$$ 		INV_REL	"TD=tdcalc(SW,SFO1,1.0e6*AQ,DIGTYP)"
$$ 		UNIT	"sec"
$$ 		FORMAT	"%14.7f sec"
$$ 		TEXT	" "
$$ END
$$ NAME		RG
$$ 		TEXT	" "
$$ END
$$ T_NAME          DW
$$ 		TYPE	R32
$$ 		CLASS	ACQU
$$ 		SUBRANGE 0.0 1000000
$$ 		REL	"DW=1/(2*SW*SFO1)"
$$ 		INV_REL	"SW=1000000/(2*(0.005+DW)*SFO1)"
$$ 		UNIT	"usec"
$$ 		FORMAT	"%14.3lf usec"
$$ 		TEXT	" "
$$ END
$$ NAME		DE
$$ 		FORMAT	"%14.2f usec"
$$ 		TEXT	" "
$$ END
$$ NAME		TE
$$ 		FORMAT	"%14.1f K"
$$ 		TEXT	" "
$$ END
$$ T_NAME		D1
$$ 		TYPE	R32
$$ 		CLASS	ACQU
$$ 		SUBRANGE 0.0 1e38
$$ 		REL	"D1=D[1]"
$$ 		INV_REL	"D[1]=D1"
$$ 		UNIT	"sec"
$$ 		FORMAT	"%14.8f sec"
$$ 		TEXT	" "
$$ END
$$ T_NAME		D11
$$ 		TYPE	R32
$$ 		CLASS	ACQU
$$ 		SUBRANGE 0.0 1e38
$$ 		REL	"D11=D[11]"
$$ 		INV_REL	"D[11]=D11"
$$ 		UNIT	"sec"
$$ 		FORMAT	"%14.8f sec"
$$ 		TEXT	" "
$$ END
$$ NAME		TD0
$$ 		TEXT	" "
$$ END
$$ HEADER		"======== CHANNEL f1 ========"
$$ NAME		SFO1
$$ 		FORMAT	"%14.7f MHz"
$$ 		TEXT	" "
$$ END
$$ NAME		NUC1
$$ 		NONEDIT
$$ 		TEXT	" "
$$ END
$$ T_NAME		P1
$$ 		TYPE	R32
$$ 		CLASS	ACQU
$$ 		SUBRANGE 0.0 1.0e10
$$ 		REL	"P1=P[1]"
$$ 		INV_REL	"P[1]=P1"
$$ 		UNIT	"usec"
$$ 		FORMAT	"%14.2f usec"
$$ 		TEXT	" "
$$ END
$$ T_NAME		PLW1
$$ 		TYPE	R32
$$ 		CLASS	ACQU
$$ 		SUBRANGE 0 73.8
$$ 		REL	"PLW1=PLW[1]"
$$ 		INV_REL	"PLW[1]=PLW1"
$$ 		UNIT	"W"
$$ 		FORMAT	"%14.8f W"
$$ 		TEXT	"power PLW1 "
$$ END
$$ HEADER		"======== CHANNEL f2 ========"
$$ NAME		SFO2
$$ 		FORMAT	"%14.7f MHz"
$$ 		TEXT	" "
$$ END
$$ NAME		NUC2
$$ 		NONEDIT
$$ 		TEXT	" "
$$ END
$$ NAME		CPDPRG[2]
$$ 		TEXT	" "
$$ END
$$ T_NAME		PCPD2
$$ 		TYPE	R32
$$ 		CLASS	ACQU
$$ 		SUBRANGE 0 1e38
$$ 		REL	"PCPD2=PCPD[2]"
$$ 		INV_REL	"PCPD[2]=PCPD2"
$$ 		UNIT	"usec"
$$ 		FORMAT	"%14.2f usec"
$$ 		TEXT	" "
$$ END
$$ T_NAME		PLW2
$$ 		TYPE	R32
$$ 		CLASS	ACQU
$$ 		SUBRANGE 0 342.6
$$ 		REL	"PLW2=PLW[2]"
$$ 		INV_REL	"PLW[2]=PLW2"
$$ 		UNIT	"W"
$$ 		FORMAT	"%14.8f W"
$$ 		TEXT	"power PLW2 "
$$ END
$$ T_NAME		PLW12
$$ 		TYPE	R32
$$ 		CLASS	ACQU
$$ 		SUBRANGE 0 342.6
$$ 		REL	"PLW12=PLW[12]"
$$ 		INV_REL	"PLW[12]=PLW12"
$$ 		UNIT	"W"
$$ 		FORMAT	"%14.8f W"
$$ 		TEXT	"power PLW12 "
$$ END
$$ 
##$PARAMETER FILE=	(integrals.txt, ASCII, , 0)
$$ 
##$PARAMETER FILE=	(intrng, ASCII, , 0)
$$ 
##$PARAMETER FILE=	(procs, ASCII, c:/Users/yma80/Data/OrganicMixtures/20190321%20Organic%20Mixtures%20-Flow/20190321%20Organic%20Mixtures%20Sample%2001/11/pdata/1/procs, 0)
$$ ##TITLE= Parameter file, TOPSPIN		Version 3.2
$$ ##JCAMPDX= 5.0
$$ ##DATATYPE= Parameter Values
$$ ##NPOINTS= 3	$$ modification sequence number
$$ ##ORIGIN= Bruker BioSpin GmbH
$$ ##OWNER= nmrsu
$$ $$ 2019-03-21 10:56:43.368 +0100  nmrsu@nmrflow
$$ $$ C:/Bruker/TopSpin3.2/data/Ellen/20190307 Organic Mixtures Sample1/11/pdata/1/procs
$$ $$ process C:\Bruker\TopSpin3.2\prog\mod\proc1d.exe
$$ ##$ABSF1= 0
$$ ##$ABSF2= 0
$$ ##$ABSG= 0
$$ ##$ABSL= 0
$$ ##$ALPHA= 0
$$ ##$AQORDER= 0
$$ ##$ASSFAC= 0
$$ ##$ASSFACI= 0
$$ ##$ASSFACX= 0
$$ ##$ASSWID= 0
$$ ##$AUNMP= <proc_1d>
$$ ##$AXLEFT= 0
$$ ##$AXNAME= <>
$$ ##$AXNUC= <1H>
$$ ##$AXRIGHT= 0
$$ ##$AXTYPE= 0
$$ ##$AXUNIT= <>
$$ ##$AZFE= 0.1
$$ ##$AZFW= 0.5
$$ ##$BCFW= 0
$$ ##$BC_mod= 0
$$ ##$BYTORDP= 0
$$ ##$COROFFS= 0
$$ ##$CY= 15
$$ ##$DATMOD= 1
$$ ##$DC= 0
$$ ##$DFILT= <>
$$ ##$DTYPP= 0
$$ ##$ERETIC= no
$$ ##$F1P= 0
$$ ##$F2P= 0
$$ ##$FCOR= 0
$$ ##$FTSIZE= 32768
$$ ##$FT_mod= 6
$$ ##$GAMMA= 0
$$ ##$GB= 0
$$ ##$INTBC= 1
$$ ##$INTSCL= 1
$$ ##$ISEN= 30
$$ ##$LB= 0
$$ ##$LEV0= 0
$$ ##$LPBIN= 0
$$ ##$MAXI= 10000
$$ ##$MC2= 0
$$ ##$MEAN= 0
$$ ##$ME_mod= 0
$$ ##$MI= 0
$$ ##$MddCEXP= no
$$ ##$MddCT_SP= no
$$ ##$MddF180= no
$$ ##$MddLAMBDA= 0
$$ ##$MddMEMORY= 0
$$ ##$MddMERGE= 0
$$ ##$MddNCOMP= 0
$$ ##$MddNITER= 0
$$ ##$MddNOISE= 0
$$ ##$MddPHASE= 0
$$ ##$MddSEED= 0
$$ ##$MddSRSIZE= 0
$$ ##$Mdd_CsALG= 0
$$ ##$Mdd_CsLAMBDA= 0
$$ ##$Mdd_CsNITER= 0
$$ ##$Mdd_CsNORM= 0
$$ ##$Mdd_CsZF= 0
$$ ##$Mdd_mod= 0
$$ ##$NCOEF= 0
$$ ##$NC_proc= -5
$$ ##$NLEV= 6
$$ ##$NOISF1= 0
$$ ##$NOISF2= 0
$$ ##$NSP= 0
$$ ##$NTH_PI= 0
$$ ##$NZP= 0
$$ ##$OFFSET= 7.998375
$$ ##$PC= 1.4
$$ ##$PHC0= -1.279999
$$ ##$PHC1= 0
$$ ##$PH_mod= 1
$$ ##$PKNL= yes
$$ ##$PPARMOD= 0
$$ ##$PPDIAG= 0
$$ ##$PPIPTYP= 0
$$ ##$PPMPNUM= 2147483647
$$ ##$PPRESOL= 1
$$ ##$PSCAL= 0
$$ ##$PSIGN= 0
$$ ##$PYNMP= <proc.py>
$$ ##$REVERSE= no
$$ ##$SF= 400.13
$$ ##$SI= 32768
$$ ##$SIGF1= 0
$$ ##$SIGF2= 0
$$ ##$SINO= 0
$$ ##$SIOLD= 1024
$$ ##$SPECTYP= <>
$$ ##$SREGLST= <>
$$ ##$SSB= 0
$$ ##$STSI= 32768
$$ ##$STSR= 0
$$ ##$SW_p= 4000
$$ ##$SYMM= 0
$$ ##$S_DEV= 0
$$ ##$TDeff= 39998
$$ ##$TDoff= 0
$$ ##$TI= <>
$$ ##$TILT= no
$$ ##$TM1= 0
$$ ##$TM2= 0
$$ ##$TOPLEV= 0
$$ ##$USERP1= <>
$$ ##$USERP2= <>
$$ ##$USERP3= <>
$$ ##$USERP4= <>
$$ ##$USERP5= <>
$$ ##$WDW= 0
$$ ##$XDIM= 0
$$ ##$YMAX_p= 287392015
$$ ##$YMIN_p= -457816
$$ ##END=
$$ 
##$PARAMETER FILE=	(pulseprogram, ASCII, c:/Users/yma80/Data/OrganicMixtures/20190321%20Organic%20Mixtures%20-Flow/20190321%20Organic%20Mixtures%20Sample%2001/11/pulseprogram, 0)
$$ # 1 "C:/Bruker/TopSpin3.2/exp/stan/nmr/lists/pp/zgig30"
$$ ;zgig30
$$ ;avance-version (12/01/11)
$$ ;1D sequence with inverse gated decoupling
$$ ;using 30 degree flip angle
$$ ;
$$ ;$CLASS=HighRes
$$ ;$DIM=1D
$$ ;$TYPE=
$$ ;$SUBTYPE=
$$ ;$COMMENT=
$$ 
$$ 
$$ # 1 "C:/Bruker/TopSpin3.2/exp/stan/nmr/lists/pp/Avance.incl" 1
$$ ;Avance3.incl
$$ ;   for AV III
$$ ;
$$ ;avance-version (13/06/17)
$$ ;
$$ ;$CLASS=HighRes Incl
$$ ;$COMMENT=
$$ # 169 "C:/Bruker/TopSpin3.2/exp/stan/nmr/lists/pp/Avance.incl"
$$ ;$Id: Avance3.incl,v 1.9.8.3 2013/08/30 09:44:49 ber Exp $
$$ # 13 "C:/Bruker/TopSpin3.2/exp/stan/nmr/lists/pp/zgig30" 2
$$ 
$$ 
$$ # 16 "C:/Bruker/TopSpin3.2/exp/stan/nmr/lists/pp/zgig30"
$$ "d11=30m"
$$ 
$$ 
$$ "acqt0=-p1*0.66/3.1416"
$$ # 1 "mc_line 22 file C:/Bruker/TopSpin3.2/exp/stan/nmr/lists/pp/zgig30 exp. def. part of mc cmd. before ze"
$$ define delay MCWRK
$$ define delay MCREST
$$ "MCREST = 30m - 30m"
$$ "MCWRK = 0.333333*30m"
$$ 
$$     dccorr
$$ # 22 "C:/Bruker/TopSpin3.2/exp/stan/nmr/lists/pp/zgig30"
$$ # 22 "C:/Bruker/TopSpin3.2/exp/stan/nmr/lists/pp/zgig30"
$$ 1 ze
$$ # 1 "mc_line 22 file C:/Bruker/TopSpin3.2/exp/stan/nmr/lists/pp/zgig30 exp. def. of mc cmd. after ze"
$$ # 23 "C:/Bruker/TopSpin3.2/exp/stan/nmr/lists/pp/zgig30"
$$   d11 pl12:f2
$$ # 1 "mc_line 24 file C:/Bruker/TopSpin3.2/exp/stan/nmr/lists/pp/zgig30 exp. start label for mc cmd."
$$ 2 MCWRK  * 2 do:f2
$$ LBLF0, MCWRK 
$$   MCREST
$$ # 25 "C:/Bruker/TopSpin3.2/exp/stan/nmr/lists/pp/zgig30"
$$   d1
$$   p1*0.33 ph1
$$   go=2 ph31 cpd2:f2
$$ # 1 "mc_line 28 file C:/Bruker/TopSpin3.2/exp/stan/nmr/lists/pp/zgig30 exp. mc cmd. in line"
$$   MCWRK do:f2 wr #0
$$   MCWRK zd
$$   lo to LBLF0 times td0
$$ 
$$   MCWRK
$$ # 29 "C:/Bruker/TopSpin3.2/exp/stan/nmr/lists/pp/zgig30"
$$ exit
$$ 
$$ 
$$ ph1=0 2 2 0 1 3 3 1
$$ ph31=0 2 2 0 1 3 3 1
$$ # 36 "C:/Bruker/TopSpin3.2/exp/stan/nmr/lists/pp/zgig30"
$$ ;pl1 : f1 channel - power level for pulse (default)
$$ ;pl12: f2 channel - power level for CPD/BB decoupling
$$ ;p1 : f1 channel -  90 degree high power pulse
$$ ;d1 : relaxation delay; 1-5 * T1
$$ ;d11: delay for disk I/O                             [30 msec]
$$ ;ns: 1 * n, total number of scans: NS * TD0
$$ ;cpd2: decoupling according to sequence defined by cpdprg2
$$ ;pcpd2: f2 channel - 90 degree pulse for decoupling sequence
$$ 
$$ 
$$ # 47 "C:/Bruker/TopSpin3.2/exp/stan/nmr/lists/pp/zgig30"
$$ ;$Id: zgig30,v 1.10.8.1 2012/01/31 17:56:42 ber Exp $
$$ 
##$PARAMETER FILE=	(title, ASCII, c:/Users/yma80/Data/OrganicMixtures/20190321%20Organic%20Mixtures%20-Flow/20190321%20Organic%20Mixtures%20Sample%2001/11/pdata/1/title, 0)
$$ zgig30
$$ Organic Mixture
$$ Sample-1	EtAc	MeAc	EtOH	MeOH
$$ mol/mol	0.25	0.25	0.25	0.25 
$$ 25C
$$ PW30, NS16
$$ 21/03/2019
##$PARAMETER FILE=	(uxnmr.par, ASCII, c:/Users/yma80/Data/OrganicMixtures/20190321%20Organic%20Mixtures%20-Flow/20190321%20Organic%20Mixtures%20Sample%2001/11/uxnmr.par, 0)
$$ ##TITLE= Parameter file, TOPSPIN		Version 3.2
$$ ##JCAMPDX= 5.0
$$ ##DATATYPE= Parameter Values
$$ ##NPOINTS= 173	$$ modification sequence number
$$ ##ORIGIN= Bruker BioSpin GmbH
$$ ##OWNER= nmrsu
$$ $$ 2019-02-26 09:09:50.211 +0100  nmrsu@nmrflow
$$ $$ C:/Bruker/TopSpin3.2/conf/instr/spect/uxnmr.par
$$ $$ process C:\Bruker\TopSpin3.2\prog\mod\confwiring.exe
$$ ##$ACB= 0
$$ ##$ACBTAT= (0..23)
$$ 0 72 88 50 0 0 0 0 0 0 0 0 0 0 0 0 0 0 0 0 0 0 0 0
$$ ##$ACBTBA= (0..23)
$$ 0 0 0 0 0 0 0 0 0 0 0 0 0 0 0 0 0 0 0 0 0 0 0 0
$$ ##$ACBTBLK= (0..23)
$$ 0 34 33 39 0 0 0 0 0 0 0 0 0 0 0 0 0 0 0 0 0 0 0 0
$$ ##$ACBTCTL= (0..23)
$$ 0 6 6 6 0 0 0 0 0 0 0 0 0 0 0 0 0 0 0 0 0 0 0 0
$$ ##$ACBTDI= (0..23)
$$ 0 -1779670018 -1779670018 -1779670252 0 0 0 0 0 0 0 0 0 0 0 0 0 0 0 0 0
$$ 0 0 0
$$ ##$ACBTDM= (0..23)
$$ 0 25 10 10 0 0 0 0 0 0 0 0 0 0 0 0 0 0 0 0 0 0 0 0
$$ ##$ACBTFHI= (0..23)
$$ 0 600 365 62 0 0 0 0 0 0 0 0 0 0 0 0 0 0 0 0 0 0 0 0
$$ ##$ACBTFL= (0..23)
$$ 0 248 248 8 0 0 0 0 0 0 0 0 0 0 0 0 0 0 0 0 0 0 0 0
$$ ##$ACBTFLO= (0..23)
$$ 0 180 6 60 0 0 0 0 0 0 0 0 0 0 0 0 0 0 0 0 0 0 0 0
$$ ##$ACBTINP= (0..23)
$$ 0 2 1 7 0 0 0 0 0 0 0 0 0 0 0 0 0 0 0 0 0 0 0 0
$$ ##$ACBTOUT= (0..23)
$$ 0 1 2 1 0 0 0 0 0 0 0 0 0 0 0 0 0 0 0 0 0 0 0 0
$$ ##$ACBTPO= (0..23)
$$ 0 100000 300000 5000 0 0 0 0 0 0 0 0 0 0 0 0 0 0 0 0 0 0 0 0
$$ ##$ACBTPW= (0..23)
$$ 0 100 100 1000 0 0 0 0 0 0 0 0 0 0 0 0 0 0 0 0 0 0 0 0
$$ ##$ACBTSB= (0..23)
$$ 0 103 99 0 0 0 0 0 0 0 0 0 0 0 0 0 0 0 0 0 0 0 0 0
$$ ##$ACBTSDT= (0..23)
$$ 0 2 2 2 0 0 0 0 0 0 0 0 0 0 0 0 0 0 0 0 0 0 0 0
$$ ##$ACBTY= <no>
$$ ##$AMPDFLT= no
$$ ##$AQSBDCH= (0..95)
$$ 0 0 0 0 0 0 0 0 255 255 255 255 255 255 255 255 255 255 255 255 255 255
$$ 255 255 255 255 255 255 255 255 255 255 255 255 255 255 255 255 255 255
$$ 255 255 255 255 255 255 255 255 255 255 255 255 255 255 255 255 255 255
$$ 255 255 255 255 255 255 255 255 255 255 255 255 255 255 255 255 255 255
$$ 255 255 255 255 255 255 255 255 255 255 255 255 255 255 255 255 255 255
$$ 255 255
$$ ##$AQSBDHW= (0..95)
$$ 5 1 0 0 0 0 0 0 255 255 255 255 255 255 255 255 255 255 255 255 255 255
$$ 255 255 255 255 255 255 255 255 255 255 255 255 255 255 255 255 255 255
$$ 255 255 255 255 255 255 255 255 255 255 255 255 255 255 255 255 255 255
$$ 255 255 255 255 255 255 255 255 255 255 255 255 255 255 255 255 255 255
$$ 255 255 255 255 255 255 255 255 255 255 255 255 255 255 255 255 255 255
$$ 255 255
$$ ##$AQSBDID= (0..95)
$$ 82 88 83 83 86 86 66 66 255 255 255 255 255 255 255 255 255 255 255 255
$$ 255 255 255 255 255 255 255 255 255 255 255 255 255 255 255 255 255 255
$$ 255 255 255 255 255 255 255 255 255 255 255 255 255 255 255 255 255 255
$$ 255 255 255 255 255 255 255 255 255 255 255 255 255 255 255 255 255 255
$$ 255 255 255 255 255 255 255 255 255 255 255 255 255 255 255 255 255 255
$$ 255 255 255 255
$$ ##$AQSBDNO= (0..95)
$$ 1 1 1 2 1 2 1 1 255 255 255 255 255 255 255 255 255 255 255 255 255 255
$$ 255 255 255 255 255 255 255 255 255 255 255 255 255 255 255 255 255 255
$$ 255 255 255 255 255 255 255 255 255 255 255 255 255 255 255 255 255 255
$$ 255 255 255 255 255 255 255 255 255 255 255 255 255 255 255 255 255 255
$$ 255 255 255 255 255 255 255 255 255 255 255 255 255 255 255 255 255 255
$$ 255 255
$$ ##$AQSBDSL= (0..95)
$$ 2 3 4 4 13 14 255 1 255 255 255 255 255 255 255 255 255 255 255 255 255
$$ 255 255 255 255 255 255 255 255 255 255 255 255 255 255 255 255 255 255
$$ 255 255 255 255 255 255 255 255 255 255 255 255 255 255 255 255 255 255
$$ 255 255 255 255 255 255 255 255 255 255 255 255 255 255 255 255 255 255
$$ 255 255 255 255 255 255 255 255 255 255 255 255 255 255 255 255 255 255
$$ 255 255 255
$$ ##$AQSBDTY= (0..95)
$$ 67 214 50 50 147 145 216 7 255 255 255 255 255 255 255 255 255 255 255
$$ 255 255 255 255 255 255 255 255 255 255 255 255 255 255 255 255 255 255
$$ 255 255 255 255 255 255 255 255 255 255 255 255 255 255 255 255 255 255
$$ 255 255 255 255 255 255 255 255 255 255 255 255 255 255 255 255 255 255
$$ 255 255 255 255 255 255 255 255 255 255 255 255 255 255 255 255 255 255
$$ 255 255 255 255 255
$$ ##$AQSBUAD= (0..95)
$$ 16 52 36 37 160 161 32 32 255 255 255 255 255 255 255 255 255 255 255 255
$$ 255 255 255 255 255 255 255 255 255 255 255 255 255 255 255 255 255 255
$$ 255 255 255 255 255 255 255 255 255 255 255 255 255 255 255 255 255 255
$$ 255 255 255 255 255 255 255 255 255 255 255 255 255 255 255 255 255 255
$$ 255 255 255 255 255 255 255 255 255 255 255 255 255 255 255 255 255 255
$$ 255 255 255 255
$$ ##$AQSECL= (0..95)
$$ 0 3 2 2 0 1 1 255 255 255 255 255 255 255 255 255 255 255 255 255 255 255
$$ 255 255 255 255 255 255 255 255 255 255 255 255 255 255 255 255 255 255
$$ 255 255 255 255 255 255 255 255 255 255 255 255 255 255 255 255 255 255
$$ 255 255 255 255 255 255 255 255 255 255 255 255 255 255 255 255 255 255
$$ 255 255 255 255 255 255 255 255 255 255 255 255 255 255 255 255 255 255
$$ 255 255
$$ ##$AQSECLS= (0..95)
$$ 2 1 2 2 1 2 1 255 255 255 255 255 255 255 255 255 255 255 255 255 255 255
$$ 255 255 255 255 255 255 255 255 255 255 255 255 255 255 255 255 255 255
$$ 255 255 255 255 255 255 255 255 255 255 255 255 255 255 255 255 255 255
$$ 255 255 255 255 255 255 255 255 255 255 255 255 255 255 255 255 255 255
$$ 255 255 255 255 255 255 255 255 255 255 255 255 255 255 255 255 255 255
$$ 255 255
$$ ##$AQSETH1= <no>
$$ ##$AQSETH2= <no>
$$ ##$AQSSPLT= no
$$ ##$ATT19F= (0..1)
$$ 0 0
$$ ##$ATT1H= (0..1)
$$ 0 0
$$ ##$ATT3H= (0..1)
$$ 0 0
$$ ##$ATTX= (0..1)
$$ 0 0
$$ ##$ATTY= (0..1)
$$ 0 0
$$ ##$ATTZ= (0..1)
$$ 0 0
$$ ##$BACSAIR= yes
$$ ##$BACSCAP= 0
$$ ##$BACSDEL= 0
$$ ##$BACSFCM= no
$$ ##$BACSOPT= <>
$$ ##$BACSTY= <no>
$$ ##$BARPTY= <no>
$$ ##$BFREQ= 400.13
$$ ##$BGAETH1= <no>
$$ ##$BGAETH2= <no>
$$ ##$BGAETH3= <no>
$$ ##$BGAETH4= <no>
$$ ##$BGAETH5= <no>
$$ ##$BGAETH6= <no>
$$ ##$BGAETH7= <no>
$$ ##$BGAETH8= <no>
$$ ##$BIRDS= yes
$$ ##$BMPC= 0
$$ ##$BMPCTY= <no>
$$ ##$BPSUTY= <no>
$$ ##$BSMS= 2
$$ ##$BSMS19FLock= no
$$ ##$BSMSETH= <149.236.99.20>
$$ ##$BSMSTY= <no>
$$ ##$BgaChMap= (0..7)
$$ 15 15 15 15 15 15 15 15
$$ ##$BgaChShimMap= (0..7)
$$ 0 0 0 0 0 0 0 0
$$ ##$Bla01Eth= <149.236.99.254>
$$ ##$Bla01Nam= <BLAXH300/100 E 200-600MHZ INR>
$$ ##$Bla01PN= <W1345083>
$$ ##$Bla01SN= <0794>
$$ ##$Bla02Eth= <149.236.99.20>
$$ ##$Bla02Nam= <BSMS/2 LOCK TRANSCEIVER 400>
$$ ##$Bla02PN= <Z109888>
$$ ##$Bla02SN= <01186>
$$ ##$Bla03Eth= <no>
$$ ##$Bla03Nam= <>
$$ ##$Bla03PN= <>
$$ ##$Bla03SN= <>
$$ ##$Bla04Eth= <no>
$$ ##$Bla04Nam= <>
$$ ##$Bla04PN= <>
$$ ##$Bla04SN= <>
$$ ##$Bla05Eth= <no>
$$ ##$Bla05Nam= <>
$$ ##$Bla05PN= <>
$$ ##$Bla05SN= <>
$$ ##$Bla06Eth= <no>
$$ ##$Bla06Nam= <>
$$ ##$Bla06PN= <>
$$ ##$Bla06SN= <>
$$ ##$Bla07Eth= <no>
$$ ##$Bla07Nam= <>
$$ ##$Bla07PN= <>
$$ ##$Bla07SN= <>
$$ ##$Bla08Eth= <no>
$$ ##$Bla08Nam= <>
$$ ##$Bla08PN= <>
$$ ##$Bla08SN= <>
$$ ##$CFASMOD= (0..7)
$$ 1 1 1 1 1 1 1 1
$$ ##$CFASMUL= (0..7)
$$ 1 1 1 1 1 1 1 1
$$ ##$CNFTXDR= (0..7)
$$ 6 6 0 0 0 0 0 0
$$ ##$COMDIG2= 0
$$ ##$CPDBTY= <no>
$$ ##$CRCOTY= <no>
$$ ##$CSW1= (0..31)
$$ 2 2 0 7 0 0 0 0 0 0 0 0 0 0 0 0 0 0 0 0 0 0 0 0 0 0 0 0 0 0 0 0
$$ ##$CSW2= (0..31)
$$ 1 1 0 0 0 0 0 0 0 0 0 0 0 0 0 0 0 0 0 0 0 0 0 0 0 0 0 0 0 0 0 0
$$ ##$CSWNUM= (0..7)
$$ 3 1 0 0 0 0 0 0
$$ ##$Ctb1Eth= <no>
$$ ##$DATSTAT= no
$$ ##$DIGI140= (0..7)
$$ 0 0 0 0 0 0 0 0
$$ ##$DIGIB12= (0..7)
$$ 0 0 0 0 0 0 0 0
$$ ##$DIGIB16= (0..7)
$$ 0 0 0 0 0 0 0 0
$$ ##$DIGIFA= (0..7)
$$ 0 0 0 0 0 0 0 0
$$ ##$DIGIHA= (0..7)
$$ 0 0 0 0 0 0 0 0
$$ ##$DIGIHAF= (0..7)
$$ 0 0 0 0 0 0 0 0
$$ ##$DIGIHRD= (0..7)
$$ 0 0 0 0 0 0 0 0
$$ ##$DIGIIA= (0..7)
$$ 0 0 0 0 0 0 0 0
$$ ##$DIGIO16= (0..7)
$$ 0 0 0 0 0 0 0 0
$$ ##$DIGISA= (0..7)
$$ 0 0 0 0 0 0 0 0
$$ ##$DIGISAF= (0..7)
$$ 0 0 0 0 0 0 0 0
$$ ##$DIGISL= (0..7)
$$ 0 0 0 0 0 0 0 0
$$ ##$DIGITYI= (0..7)
$$ 0 0 0 0 0 0 0 0
$$ ##$DIGITYP= (0..7)
$$ 0 0 0 0 0 0 0 0
$$ ##$DIGITZ= 0
$$ ##$DPPFAC= 1
$$ ##$DRMSETH= <no>
$$ ##$DRU= yes
$$ ##$DRUETH01= <149.236.99.89>
$$ ##$DRUETH02= <no>
$$ ##$DRUETH03= <no>
$$ ##$DRUETH04= <no>
$$ ##$DRUETH05= <no>
$$ ##$DRUETH06= <no>
$$ ##$DRUETH07= <no>
$$ ##$DRUETH08= <no>
$$ ##$DRUETH09= <no>
$$ ##$DRUETH10= <no>
$$ ##$DRUETH11= <no>
$$ ##$DRUETH12= <no>
$$ ##$DRUETH13= <no>
$$ ##$DRUETH14= <no>
$$ ##$DRUETH15= <no>
$$ ##$DRUETH16= <no>
$$ ##$DRUETH17= <no>
$$ ##$DRUETH18= <no>
$$ ##$DRUETH19= <no>
$$ ##$DRUETH20= <no>
$$ ##$DRUETH21= <no>
$$ ##$DRUETH22= <no>
$$ ##$DRUETH23= <no>
$$ ##$DRUETH24= <no>
$$ ##$DRUETH25= <no>
$$ ##$DRUETH26= <no>
$$ ##$DRUETH27= <no>
$$ ##$DRUETH28= <no>
$$ ##$DRUETH29= <no>
$$ ##$DRUETH30= <no>
$$ ##$DRUETH31= <no>
$$ ##$DRUETH32= <no>
$$ ##$Description= <CABINET 400 HD OB>
$$ ##$DppType= 0
$$ ##$FCUMEM= (0..7)
$$ 16777208 16777208 0 0 0 0 0 0
$$ ##$FCUPAL= (0..7)
$$ 0 0 0 0 0 0 0 0
$$ ##$FGSVTY= <no>
$$ ##$FQMIX= 0
$$ ##$FUNCMOD= <>
$$ ##$GCUTYPE= 10
$$ ##$GCUTYPE2= 0
$$ ##$GPREDEL= 0
$$ ##$GPSCUTY= <no>
$$ ##$GRADRES= 5
$$ ##$GTUTY= <no>
$$ ##$GradAmpGain= (0..1)
$$ 0 0
$$ ##$GradAmpMaxCurX= (0..1)
$$ 0 0
$$ ##$GradAmpMaxCurY= (0..1)
$$ 0 0
$$ ##$GradAmpMaxCurZ= (0..1)
$$ 9.99999904632568 0
$$ ##$GradAmpType= (0..1)
$$ 2 0
$$ ##$HDIETH1= <no>
$$ ##$HDIETH2= <no>
$$ ##$HDIETH3= <no>
$$ ##$HDIETH4= <no>
$$ ##$HFAC= 3
$$ ##$HPCU= 0
$$ ##$HPCUTY= <no>
$$ ##$HPTXLP= (0..3)
$$ -1 -1 -1 -1
$$ ##$HPTXPI= (0..3)
$$ 0 0 0 0
$$ ##$HPTXPO= (0..3)
$$ 0 0 0 0
$$ ##$HPTXTY= (0..3)
$$ 0 0 0 0
$$ ##$IF451= 0
$$ ##$IFREQ= 1
$$ ##$INTFPR= 0
$$ ##$IPSOETH= <149.236.99.253>
$$ ##$LOCKCONF= <DLM>
$$ ##$LOCKTY= <no>
$$ ##$LOCSWID= 0
$$ ##$LOCSWIF= 0
$$ ##$LVDSSPLITETH1= <no>
$$ ##$LVDSSPLITETH2= <no>
$$ ##$LVDSSPLITETH3= <no>
$$ ##$LVDSSPLITETH4= <no>
$$ ##$Location= <Technische Universitaet Kaiserslautern >
$$ ##$M2FAC= 0
$$ ##$MAS= 0
$$ ##$MASETIME= 10
$$ ##$MASITIME= 10
$$ ##$MASTY= <no>
$$ ##$MAS_CT= 5
$$ ##$MAS_SG= 0
$$ ##$MAS_TO= 0
$$ ##$MEMPRM= 0
$$ ##$MHFAC= 0
$$ ##$MXFAC= 0
$$ ##$NAMPD1= <1H/2H 1H>
$$ ##$NAMPD10= <>
$$ ##$NAMPD11= <>
$$ ##$NAMPD12= <>
$$ ##$NAMPD13= <>
$$ ##$NAMPD14= <>
$$ ##$NAMPD15= <>
$$ ##$NAMPD16= <>
$$ ##$NAMPD2= <1H/2H 2H>
$$ ##$NAMPD3= <XBB19F 2HS>
$$ ##$NAMPD4= <>
$$ ##$NAMPD5= <>
$$ ##$NAMPD6= <>
$$ ##$NAMPD7= <>
$$ ##$NAMPD8= <>
$$ ##$NAMPD9= <>
$$ ##$NFCU= 2
$$ ##$NFRED= 0
$$ ##$NMRCH= 2
$$ ##$NMRMEM= 16384
$$ ##$NPSGU= 0
$$ ##$NRCU= 1
$$ ##$NROUT= 0
$$ ##$NSGU= 2
$$ ##$OrderNo= <10123019>
$$ ##$PAMPF1= (0..15)
$$ 75 24 96 64 0 0 0 0 0 0 0 0 0 0 0 0
$$ ##$PAMPF2= (0..15)
$$ 0 0 0 0 0 0 0 0 0 0 0 0 0 0 0 0
$$ ##$PAMPF3= (0..15)
$$ 0 0 0 0 0 0 0 0 0 0 0 0 0 0 0 0
$$ ##$PAMPF4= (0..15)
$$ 0 0 0 0 0 0 0 0 0 0 0 0 0 0 0 0
$$ ##$PAMPF5= (0..15)
$$ 0 0 0 0 0 0 0 0 0 0 0 0 0 0 0 0
$$ ##$PAMPF6= (0..15)
$$ 0 0 0 0 0 0 0 0 0 0 0 0 0 0 0 0
$$ ##$PAMPF7= (0..15)
$$ 0 0 0 0 0 0 0 0 0 0 0 0 0 0 0 0
$$ ##$PAMPF8= (0..15)
$$ 0 0 0 0 0 0 0 0 0 0 0 0 0 0 0 0
$$ ##$PH4= 0
$$ ##$PHF4TY= <no>
$$ ##$POWCHK= yes
$$ ##$PRAMD1= (0..7)
$$ 2 0 0 536870912 0 0 0 0
$$ ##$PRAMD10= (0..7)
$$ 0 0 0 0 0 0 0 0
$$ ##$PRAMD11= (0..7)
$$ 0 0 0 0 0 0 0 0
$$ ##$PRAMD12= (0..7)
$$ 0 0 0 0 0 0 0 0
$$ ##$PRAMD13= (0..7)
$$ 0 0 0 0 0 0 0 0
$$ ##$PRAMD14= (0..7)
$$ 0 0 0 0 0 0 0 0
$$ ##$PRAMD15= (0..7)
$$ 0 0 0 0 0 0 0 0
$$ ##$PRAMD16= (0..7)
$$ 0 0 0 0 0 0 0 0
$$ ##$PRAMD17= (0..7)
$$ 0 0 0 0 0 0 0 0
$$ ##$PRAMD18= (0..7)
$$ 0 0 0 0 0 0 0 0
$$ ##$PRAMD19= (0..7)
$$ 0 0 0 0 0 0 0 0
$$ ##$PRAMD2= (0..7)
$$ 0 1048576 0 536870912 0 1048576 0 536870912
$$ ##$PRAMD20= (0..7)
$$ 0 0 0 0 0 0 0 0
$$ ##$PRAMD21= (0..7)
$$ 0 0 0 0 0 0 0 0
$$ ##$PRAMD3= (0..7)
$$ 2147483644 2131230719 2147483647 603979775 0 0 0 0
$$ ##$PRAMD4= (0..7)
$$ 0 0 0 0 0 0 0 0
$$ ##$PRAMD5= (0..7)
$$ 0 0 0 0 0 0 0 0
$$ ##$PRAMD6= (0..7)
$$ 0 0 0 0 0 0 0 0
$$ ##$PRAMD7= (0..7)
$$ 0 0 0 0 0 0 0 0
$$ ##$PRAMD8= (0..7)
$$ 0 0 0 0 0 0 0 0
$$ ##$PRAMD9= (0..7)
$$ 0 0 0 0 0 0 0 0
$$ ##$PRAMLED= (0..1)
$$ 0 0
$$ ##$PRAMP1= <tty10>
$$ ##$PRAMP2= <no>
$$ ##$PRAMP3= <no>
$$ ##$PRAMP4= <no>
$$ ##$PRAMP5= <no>
$$ ##$PRAMP6= <no>
$$ ##$PRAMP7= <no>
$$ ##$PRAMP8= <no>
$$ ##$PRAMPTP= 1
$$ ##$PREPTY= <no>
$$ ##$PREREC= (0..15)
$$ 0 0 0 0 0 0 0 0 0 0 0 0 0 0 0 0
$$ ##$PRESHLD= 0
$$ ##$PTS160= -1
$$ ##$PTSA2X= (0..7)
$$ 0 0 0 0 0 0 0 0
$$ ##$PTSF2X= (0..7)
$$ 0 0 0 0 0 0 0 0
$$ ##$PTSFMX= (0..19)
$$ 649.9 649.9 0 0 0 0 0 0 0 0 0 0 0 0 0 0 0 0 0 0
$$ ##$PULCHK= no
$$ ##$PramDutyCycPerc= (0..15)
$$ 2 2 2 0 0 0 0 0 0 0 0 0 0 0 0 0
$$ ##$PramPeakPowerW= (0..15)
$$ 150 300 500 0 0 0 0 0 0 0 0 0 0 0 0 0
$$ ##$PramPulWidthMs= (0..15)
$$ 0.02 0.1 0.1 0 0 0 0 0 0 0 0 0 0 0 0 0
$$ ##$PreampMod01PN= <Z003959>
$$ ##$PreampMod01SN= <01080>
$$ ##$PreampMod02PN= <Z003959>
$$ ##$PreampMod02SN= <01080>
$$ ##$PreampMod03PN= <Z003504>
$$ ##$PreampMod03SN= <01096>
$$ ##$PreampMod04PN= <>
$$ ##$PreampMod04SN= <>
$$ ##$PreampMod05PN= <>
$$ ##$PreampMod05SN= <>
$$ ##$PreampMod06PN= <>
$$ ##$PreampMod06SN= <>
$$ ##$PreampMod07PN= <>
$$ ##$PreampMod07SN= <>
$$ ##$PreampMod08PN= <>
$$ ##$PreampMod08SN= <>
$$ ##$PreampMod09PN= <>
$$ ##$PreampMod09SN= <>
$$ ##$PreampMod10PN= <>
$$ ##$PreampMod10SN= <>
$$ ##$PreampMod11PN= <>
$$ ##$PreampMod11SN= <>
$$ ##$PreampMod12PN= <>
$$ ##$PreampMod12SN= <>
$$ ##$PreampMod13PN= <>
$$ ##$PreampMod13SN= <>
$$ ##$PreampMod14PN= <>
$$ ##$PreampMod14SN= <>
$$ ##$PreampMod15PN= <>
$$ ##$PreampMod15SN= <>
$$ ##$PreampMod16PN= <>
$$ ##$PreampMod16SN= <>
$$ ##$PreampModBisDat= (0..15)
$$ 20131219 20131219 20131209 0 0 0 0 0 0 0 0 0 0 0 0 0
$$ ##$ProdigyEth= <no>
$$ ##$RCUCDS= (0..7)
$$ 0 0 0 0 0 0 0 0
$$ ##$RCUCFS= (0..7)
$$ 0 0 0 0 0 0 0 0
$$ ##$RCUCSS= (0..7)
$$ 0 0 0 0 0 0 0 0
$$ ##$RCUI2C1= (0..7)
$$ 0 0 0 0 0 0 0 0
$$ ##$RCUI2C2= (0..7)
$$ 0 0 0 0 0 0 0 0
$$ ##$RCUI2C3= (0..7)
$$ 0 0 0 0 0 0 0 0
$$ ##$RCUI2C4= (0..7)
$$ 0 0 0 0 0 0 0 0
$$ ##$RCUI2C5= (0..7)
$$ 0 0 0 0 0 0 0 0
$$ ##$RCUI2C6= (0..7)
$$ 0 0 0 0 0 0 0 0
$$ ##$RCUI2C7= (0..7)
$$ 0 0 0 0 0 0 0 0
$$ ##$RCUI2C8= (0..7)
$$ 0 0 0 0 0 0 0 0
$$ ##$RDCU= 0
$$ ##$RFSINPUT= (0..1)
$$ 0 0
$$ ##$RFSVTY= <no>
$$ ##$RGTYPE= (0..31)
$$ 9 0 0 0 0 0 0 0 0 0 0 0 0 0 0 0 0 0 0 0 0 0 0 0 0 0 0 0 0 0 0 0
$$ ##$RG_max= (0..31)
$$ 203 0 0 0 0 0 0 0 0 0 0 0 0 0 0 0 0 0 0 0 0 0 0 0 0 0 0 0 0 0 0 0
$$ ##$RG_min= (0..31)
$$ 0.25 0 0 0 0 0 0 0 0 0 0 0 0 0 0 0 0 0 0 0 0 0 0 0 0 0 0 0 0 0 0 0
$$ ##$RG_tab1= (0..255)
$$ 0.25 0.28 0.32 0.35 0.4 0.44 0.5 0.56 0.64 0.7 0.8 0.89 1 1.12 1.28 1.4
$$ 1.6 1.78 2 2.25 2.56 2.8 3.2 3.56 4 4.5 5 5.6 6.35 7.12 8 9 10 11.3 12.7
$$ 14.2 16 18 20.2 22.6 25.4 28.5 32 36 40.3 45.2 50.8 57 64 71.8 80.6 90.5
$$ 101 114 128 144 161 181 203 -1 -1 -1 -1 -1 -1 -1 -1 -1 -1 -1 -1 -1 -1 -1
$$ -1 -1 -1 -1 -1 -1 -1 -1 -1 -1 -1 -1 -1 -1 -1 -1 -1 -1 -1 -1 -1 -1 -1 -1
$$ -1 -1 -1 -1 -1 -1 -1 -1 -1 -1 -1 -1 -1 -1 -1 -1 -1 -1 -1 -1 -1 -1 -1 -1
$$ -1 -1 -1 -1 -1 -1 -1 -1 -1 -1 -1 -1 -1 -1 -1 -1 -1 -1 -1 -1 -1 -1 -1 -1
$$ -1 -1 -1 -1 -1 -1 -1 -1 -1 -1 -1 -1 -1 -1 -1 -1 -1 -1 -1 -1 -1 -1 -1 -1
$$ -1 -1 -1 -1 -1 -1 -1 -1 -1 -1 -1 -1 -1 -1 -1 -1 -1 -1 -1 -1 -1 -1 -1 -1
$$ -1 -1 -1 -1 -1 -1 -1 -1 -1 -1 -1 -1 -1 -1 -1 -1 -1 -1 -1 -1 -1 -1 -1 -1
$$ -1 -1 -1 -1 -1 -1 -1 -1 -1 -1 -1 -1 -1 -1 -1 -1 -1 -1 -1 -1 -1 -1 -1 -1
$$ -1 -1 -1 -1 -1 -1 -1 -1 -1 -1 -1 -1 -1 -1
$$ ##$RG_tab2= (0..255)
$$ -1 -1 -1 -1 -1 -1 -1 -1 -1 -1 -1 -1 -1 -1 -1 -1 -1 -1 -1 -1 -1 -1 -1 -1
$$ -1 -1 -1 -1 -1 -1 -1 -1 -1 -1 -1 -1 -1 -1 -1 -1 -1 -1 -1 -1 -1 -1 -1 -1
$$ -1 -1 -1 -1 -1 -1 -1 -1 -1 -1 -1 -1 -1 -1 -1 -1 -1 -1 -1 -1 -1 -1 -1 -1
$$ -1 -1 -1 -1 -1 -1 -1 -1 -1 -1 -1 -1 -1 -1 -1 -1 -1 -1 -1 -1 -1 -1 -1 -1
$$ -1 -1 -1 -1 -1 -1 -1 -1 -1 -1 -1 -1 -1 -1 -1 -1 -1 -1 -1 -1 -1 -1 -1 -1
$$ -1 -1 -1 -1 -1 -1 -1 -1 -1 -1 -1 -1 -1 -1 -1 -1 -1 -1 -1 -1 -1 -1 -1 -1
$$ -1 -1 -1 -1 -1 -1 -1 -1 -1 -1 -1 -1 -1 -1 -1 -1 -1 -1 -1 -1 -1 -1 -1 -1
$$ -1 -1 -1 -1 -1 -1 -1 -1 -1 -1 -1 -1 -1 -1 -1 -1 -1 -1 -1 -1 -1 -1 -1 -1
$$ -1 -1 -1 -1 -1 -1 -1 -1 -1 -1 -1 -1 -1 -1 -1 -1 -1 -1 -1 -1 -1 -1 -1 -1
$$ -1 -1 -1 -1 -1 -1 -1 -1 -1 -1 -1 -1 -1 -1 -1 -1 -1 -1 -1 -1 -1 -1 -1 -1
$$ -1 -1 -1 -1 -1 -1 -1 -1 -1 -1 -1 -1 -1 -1 -1 -1
$$ ##$RG_tab3= (0..255)
$$ -1 -1 -1 -1 -1 -1 -1 -1 -1 -1 -1 -1 -1 -1 -1 -1 -1 -1 -1 -1 -1 -1 -1 -1
$$ -1 -1 -1 -1 -1 -1 -1 -1 -1 -1 -1 -1 -1 -1 -1 -1 -1 -1 -1 -1 -1 -1 -1 -1
$$ -1 -1 -1 -1 -1 -1 -1 -1 -1 -1 -1 -1 -1 -1 -1 -1 -1 -1 -1 -1 -1 -1 -1 -1
$$ -1 -1 -1 -1 -1 -1 -1 -1 -1 -1 -1 -1 -1 -1 -1 -1 -1 -1 -1 -1 -1 -1 -1 -1
$$ -1 -1 -1 -1 -1 -1 -1 -1 -1 -1 -1 -1 -1 -1 -1 -1 -1 -1 -1 -1 -1 -1 -1 -1
$$ -1 -1 -1 -1 -1 -1 -1 -1 -1 -1 -1 -1 -1 -1 -1 -1 -1 -1 -1 -1 -1 -1 -1 -1
$$ -1 -1 -1 -1 -1 -1 -1 -1 -1 -1 -1 -1 -1 -1 -1 -1 -1 -1 -1 -1 -1 -1 -1 -1
$$ -1 -1 -1 -1 -1 -1 -1 -1 -1 -1 -1 -1 -1 -1 -1 -1 -1 -1 -1 -1 -1 -1 -1 -1
$$ -1 -1 -1 -1 -1 -1 -1 -1 -1 -1 -1 -1 -1 -1 -1 -1 -1 -1 -1 -1 -1 -1 -1 -1
$$ -1 -1 -1 -1 -1 -1 -1 -1 -1 -1 -1 -1 -1 -1 -1 -1 -1 -1 -1 -1 -1 -1 -1 -1
$$ -1 -1 -1 -1 -1 -1 -1 -1 -1 -1 -1 -1 -1 -1 -1 -1
$$ ##$RG_tab4= (0..255)
$$ -1 -1 -1 -1 -1 -1 -1 -1 -1 -1 -1 -1 -1 -1 -1 -1 -1 -1 -1 -1 -1 -1 -1 -1
$$ -1 -1 -1 -1 -1 -1 -1 -1 -1 -1 -1 -1 -1 -1 -1 -1 -1 -1 -1 -1 -1 -1 -1 -1
$$ -1 -1 -1 -1 -1 -1 -1 -1 -1 -1 -1 -1 -1 -1 -1 -1 -1 -1 -1 -1 -1 -1 -1 -1
$$ -1 -1 -1 -1 -1 -1 -1 -1 -1 -1 -1 -1 -1 -1 -1 -1 -1 -1 -1 -1 -1 -1 -1 -1
$$ -1 -1 -1 -1 -1 -1 -1 -1 -1 -1 -1 -1 -1 -1 -1 -1 -1 -1 -1 -1 -1 -1 -1 -1
$$ -1 -1 -1 -1 -1 -1 -1 -1 -1 -1 -1 -1 -1 -1 -1 -1 -1 -1 -1 -1 -1 -1 -1 -1
$$ -1 -1 -1 -1 -1 -1 -1 -1 -1 -1 -1 -1 -1 -1 -1 -1 -1 -1 -1 -1 -1 -1 -1 -1
$$ -1 -1 -1 -1 -1 -1 -1 -1 -1 -1 -1 -1 -1 -1 -1 -1 -1 -1 -1 -1 -1 -1 -1 -1
$$ -1 -1 -1 -1 -1 -1 -1 -1 -1 -1 -1 -1 -1 -1 -1 -1 -1 -1 -1 -1 -1 -1 -1 -1
$$ -1 -1 -1 -1 -1 -1 -1 -1 -1 -1 -1 -1 -1 -1 -1 -1 -1 -1 -1 -1 -1 -1 -1 -1
$$ -1 -1 -1 -1 -1 -1 -1 -1 -1 -1 -1 -1 -1 -1 -1 -1
$$ ##$RG_tab5= (0..255)
$$ -1 -1 -1 -1 -1 -1 -1 -1 -1 -1 -1 -1 -1 -1 -1 -1 -1 -1 -1 -1 -1 -1 -1 -1
$$ -1 -1 -1 -1 -1 -1 -1 -1 -1 -1 -1 -1 -1 -1 -1 -1 -1 -1 -1 -1 -1 -1 -1 -1
$$ -1 -1 -1 -1 -1 -1 -1 -1 -1 -1 -1 -1 -1 -1 -1 -1 -1 -1 -1 -1 -1 -1 -1 -1
$$ -1 -1 -1 -1 -1 -1 -1 -1 -1 -1 -1 -1 -1 -1 -1 -1 -1 -1 -1 -1 -1 -1 -1 -1
$$ -1 -1 -1 -1 -1 -1 -1 -1 -1 -1 -1 -1 -1 -1 -1 -1 -1 -1 -1 -1 -1 -1 -1 -1
$$ -1 -1 -1 -1 -1 -1 -1 -1 -1 -1 -1 -1 -1 -1 -1 -1 -1 -1 -1 -1 -1 -1 -1 -1
$$ -1 -1 -1 -1 -1 -1 -1 -1 -1 -1 -1 -1 -1 -1 -1 -1 -1 -1 -1 -1 -1 -1 -1 -1
$$ -1 -1 -1 -1 -1 -1 -1 -1 -1 -1 -1 -1 -1 -1 -1 -1 -1 -1 -1 -1 -1 -1 -1 -1
$$ -1 -1 -1 -1 -1 -1 -1 -1 -1 -1 -1 -1 -1 -1 -1 -1 -1 -1 -1 -1 -1 -1 -1 -1
$$ -1 -1 -1 -1 -1 -1 -1 -1 -1 -1 -1 -1 -1 -1 -1 -1 -1 -1 -1 -1 -1 -1 -1 -1
$$ -1 -1 -1 -1 -1 -1 -1 -1 -1 -1 -1 -1 -1 -1 -1 -1
$$ ##$RG_tab6= (0..255)
$$ -1 -1 -1 -1 -1 -1 -1 -1 -1 -1 -1 -1 -1 -1 -1 -1 -1 -1 -1 -1 -1 -1 -1 -1
$$ -1 -1 -1 -1 -1 -1 -1 -1 -1 -1 -1 -1 -1 -1 -1 -1 -1 -1 -1 -1 -1 -1 -1 -1
$$ -1 -1 -1 -1 -1 -1 -1 -1 -1 -1 -1 -1 -1 -1 -1 -1 -1 -1 -1 -1 -1 -1 -1 -1
$$ -1 -1 -1 -1 -1 -1 -1 -1 -1 -1 -1 -1 -1 -1 -1 -1 -1 -1 -1 -1 -1 -1 -1 -1
$$ -1 -1 -1 -1 -1 -1 -1 -1 -1 -1 -1 -1 -1 -1 -1 -1 -1 -1 -1 -1 -1 -1 -1 -1
$$ -1 -1 -1 -1 -1 -1 -1 -1 -1 -1 -1 -1 -1 -1 -1 -1 -1 -1 -1 -1 -1 -1 -1 -1
$$ -1 -1 -1 -1 -1 -1 -1 -1 -1 -1 -1 -1 -1 -1 -1 -1 -1 -1 -1 -1 -1 -1 -1 -1
$$ -1 -1 -1 -1 -1 -1 -1 -1 -1 -1 -1 -1 -1 -1 -1 -1 -1 -1 -1 -1 -1 -1 -1 -1
$$ -1 -1 -1 -1 -1 -1 -1 -1 -1 -1 -1 -1 -1 -1 -1 -1 -1 -1 -1 -1 -1 -1 -1 -1
$$ -1 -1 -1 -1 -1 -1 -1 -1 -1 -1 -1 -1 -1 -1 -1 -1 -1 -1 -1 -1 -1 -1 -1 -1
$$ -1 -1 -1 -1 -1 -1 -1 -1 -1 -1 -1 -1 -1 -1 -1 -1
$$ ##$RG_tab7= (0..255)
$$ -1 -1 -1 -1 -1 -1 -1 -1 -1 -1 -1 -1 -1 -1 -1 -1 -1 -1 -1 -1 -1 -1 -1 -1
$$ -1 -1 -1 -1 -1 -1 -1 -1 -1 -1 -1 -1 -1 -1 -1 -1 -1 -1 -1 -1 -1 -1 -1 -1
$$ -1 -1 -1 -1 -1 -1 -1 -1 -1 -1 -1 -1 -1 -1 -1 -1 -1 -1 -1 -1 -1 -1 -1 -1
$$ -1 -1 -1 -1 -1 -1 -1 -1 -1 -1 -1 -1 -1 -1 -1 -1 -1 -1 -1 -1 -1 -1 -1 -1
$$ -1 -1 -1 -1 -1 -1 -1 -1 -1 -1 -1 -1 -1 -1 -1 -1 -1 -1 -1 -1 -1 -1 -1 -1
$$ -1 -1 -1 -1 -1 -1 -1 -1 -1 -1 -1 -1 -1 -1 -1 -1 -1 -1 -1 -1 -1 -1 -1 -1
$$ -1 -1 -1 -1 -1 -1 -1 -1 -1 -1 -1 -1 -1 -1 -1 -1 -1 -1 -1 -1 -1 -1 -1 -1
$$ -1 -1 -1 -1 -1 -1 -1 -1 -1 -1 -1 -1 -1 -1 -1 -1 -1 -1 -1 -1 -1 -1 -1 -1
$$ -1 -1 -1 -1 -1 -1 -1 -1 -1 -1 -1 -1 -1 -1 -1 -1 -1 -1 -1 -1 -1 -1 -1 -1
$$ -1 -1 -1 -1 -1 -1 -1 -1 -1 -1 -1 -1 -1 -1 -1 -1 -1 -1 -1 -1 -1 -1 -1 -1
$$ -1 -1 -1 -1 -1 -1 -1 -1 -1 -1 -1 -1 -1 -1 -1 -1
$$ ##$RG_tab8= (0..255)
$$ -1 -1 -1 -1 -1 -1 -1 -1 -1 -1 -1 -1 -1 -1 -1 -1 -1 -1 -1 -1 -1 -1 -1 -1
$$ -1 -1 -1 -1 -1 -1 -1 -1 -1 -1 -1 -1 -1 -1 -1 -1 -1 -1 -1 -1 -1 -1 -1 -1
$$ -1 -1 -1 -1 -1 -1 -1 -1 -1 -1 -1 -1 -1 -1 -1 -1 -1 -1 -1 -1 -1 -1 -1 -1
$$ -1 -1 -1 -1 -1 -1 -1 -1 -1 -1 -1 -1 -1 -1 -1 -1 -1 -1 -1 -1 -1 -1 -1 -1
$$ -1 -1 -1 -1 -1 -1 -1 -1 -1 -1 -1 -1 -1 -1 -1 -1 -1 -1 -1 -1 -1 -1 -1 -1
$$ -1 -1 -1 -1 -1 -1 -1 -1 -1 -1 -1 -1 -1 -1 -1 -1 -1 -1 -1 -1 -1 -1 -1 -1
$$ -1 -1 -1 -1 -1 -1 -1 -1 -1 -1 -1 -1 -1 -1 -1 -1 -1 -1 -1 -1 -1 -1 -1 -1
$$ -1 -1 -1 -1 -1 -1 -1 -1 -1 -1 -1 -1 -1 -1 -1 -1 -1 -1 -1 -1 -1 -1 -1 -1
$$ -1 -1 -1 -1 -1 -1 -1 -1 -1 -1 -1 -1 -1 -1 -1 -1 -1 -1 -1 -1 -1 -1 -1 -1
$$ -1 -1 -1 -1 -1 -1 -1 -1 -1 -1 -1 -1 -1 -1 -1 -1 -1 -1 -1 -1 -1 -1 -1 -1
$$ -1 -1 -1 -1 -1 -1 -1 -1 -1 -1 -1 -1 -1 -1 -1 -1
$$ ##$RG_tabA= (0..255)
$$ 0.25 0.28 0.32 0.35 0.4 0.44 0.5 0.56 0.64 0.7 0.8 0.89 1 1.12 1.28 1.4
$$ 1.6 1.78 2 2.25 2.56 2.8 3.2 3.56 4 4.5 5 5.6 6.35 7.12 8 9 10 11.3 12.7
$$ 14.2 16 18 20.2 22.6 25.4 28.5 32 36 40.3 45.2 50.8 57 64 71.8 80.6 90.5
$$ 101 114 128 144 161 181 203 -1 -1 -1 -1 -1 -1 -1 -1 -1 -1 -1 -1 -1 -1 -1
$$ -1 -1 -1 -1 -1 -1 -1 -1 -1 -1 -1 -1 -1 -1 -1 -1 -1 -1 -1 -1 -1 -1 -1 -1
$$ -1 -1 -1 -1 -1 -1 -1 -1 -1 -1 -1 -1 -1 -1 -1 -1 -1 -1 -1 -1 -1 -1 -1 -1
$$ -1 -1 -1 -1 -1 -1 -1 -1 -1 -1 -1 -1 -1 -1 -1 -1 -1 -1 -1 -1 -1 -1 -1 -1
$$ -1 -1 -1 -1 -1 -1 -1 -1 -1 -1 -1 -1 -1 -1 -1 -1 -1 -1 -1 -1 -1 -1 -1 -1
$$ -1 -1 -1 -1 -1 -1 -1 -1 -1 -1 -1 -1 -1 -1 -1 -1 -1 -1 -1 -1 -1 -1 -1 -1
$$ -1 -1 -1 -1 -1 -1 -1 -1 -1 -1 -1 -1 -1 -1 -1 -1 -1 -1 -1 -1 -1 -1 -1 -1
$$ -1 -1 -1 -1 -1 -1 -1 -1 -1 -1 -1 -1 -1 -1 -1 -1 -1 -1 -1 -1 -1 -1 -1 -1
$$ -1 -1 -1 -1 -1 -1 -1 -1 -1 -1 -1 -1 -1 -1
$$ ##$ROUT14= (0..7)
$$ 0 0 0 0 0 0 0 0
$$ ##$ROUTER= -1
$$ ##$RX22TY= <no>
$$ ##$RXFMAX= (0..7)
$$ 647.5 -1 -1 -1 -1 -1 -1 -1
$$ ##$RXFMIN= (0..7)
$$ 5 -1 -1 -1 -1 -1 -1 -1
$$ ##$RXINTLV= (0..7)
$$ 1 0 0 0 0 0 0 0
$$ ##$RXMSTY= <no>
$$ ##$SCMTY= <no>
$$ ##$SGUC1= (0..15)
$$ 17 18 0 0 0 0 0 0 0 0 0 0 0 0 0 0
$$ ##$SGUC2= (0..15)
$$ 33 256 0 0 0 0 0 0 0 0 0 0 0 0 0 0
$$ ##$SLCBCONF= <SHNV>
$$ ##$SPECTR= 10
$$ ##$SY2FLAG= 0
$$ ##$SYNCTRIG= 11
$$ ##$SamChgEth= (0..3)
$$ <no> <no> <no> <no>
$$ ##$Sgu1PowerLevels= (0..7)
$$ 90 74 58 42 26 10 0 0
$$ ##$Sgu2PowerLevels= (0..7)
$$ 90 74 58 42 26 10 0 0
$$ ##$Sgu3PowerLevels= (0..7)
$$ 0 0 0 0 0 0 0 0
$$ ##$Sgu4PowerLevels= (0..7)
$$ 0 0 0 0 0 0 0 0
$$ ##$Sgu5PowerLevels= (0..7)
$$ 0 0 0 0 0 0 0 0
$$ ##$Sgu6PowerLevels= (0..7)
$$ 0 0 0 0 0 0 0 0
$$ ##$Sgu7PowerLevels= (0..7)
$$ 0 0 0 0 0 0 0 0
$$ ##$Sgu8PowerLevels= (0..7)
$$ 0 0 0 0 0 0 0 0
$$ ##$SguType= 3
$$ ##$ShimPowMaxUA= (0..63)
$$ 130000 130000 130000 130000 130000 130000 130000 130000 130000 130000 130000
$$ 130000 130000 130000 130000 130000 130000 130000 130000 130000 0 0 0 0
$$ 0 0 0 0 0 0 0 0 0 0 0 0 0 0 0 0 0 0 0 0 0 0 0 0 0 0 0 0 0 0 0 0 0 0 0 0
$$ 0 0 0 0
$$ ##$ShimPowMaxUC= (0..63)
$$ 130000 130000 130000 130000 130000 130000 130000 130000 130000 130000 130000
$$ 130000 130000 130000 130000 130000 130000 130000 130000 130000 0 0 0 0
$$ 0 0 0 0 0 0 0 0 0 0 0 0 0 0 0 0 0 0 0 0 0 0 0 0 0 0 0 0 0 0 0 0 0 0 0 0
$$ 0 0 0 0
$$ ##$ShimPowMaxUG= (0..63)
$$ 524287 524287 524287 524287 524287 524287 524287 524287 524287 524287 524287
$$ 524287 524287 524287 524287 524287 524287 524287 524287 524287 0 0 0 0
$$ 0 0 0 0 0 0 0 0 0 0 0 0 0 0 0 0 0 0 0 0 0 0 0 0 0 0 0 0 0 0 0 0 0 0 0 0
$$ 0 0 0 0
$$ ##$ShimPowRcbType= 3
$$ ##$ShimPowRes= (0..63)
$$ 1e-020 1e-020 1e-020 1e-020 1e-020 1e-020 1e-020 1e-020 1e-020 1e-020 1e-020
$$ 1e-020 1e-020 1e-020 1e-020 1e-020 1e-020 1e-020 1e-020 1e-020 0 0 0 0
$$ 0 0 0 0 0 0 0 0 0 0 0 0 0 0 0 0 0 0 0 0 0 0 0 0 0 0 0 0 0 0 0 0 0 0 0 0
$$ 0 0 0 0
$$ ##$ShimPowRng0= (0..63)
$$ 1 1 1 1 1 1 1 1 1 1 1 1 1 1 1 1 1 1 1 1 0 0 0 0 0 0 0 0 0 0 0 0 0 0 0 0
$$ 0 0 0 0 0 0 0 0 0 0 0 0 0 0 0 0 0 0 0 0 0 0 0 0 0 0 0 0
$$ ##$ShimPowRng1= (0..63)
$$ 1 1 1 1 1 1 1 1 1 1 1 1 1 1 1 1 1 1 1 1 0 0 0 0 0 0 0 0 0 0 0 0 0 0 0 0
$$ 0 0 0 0 0 0 0 0 0 0 0 0 0 0 0 0 0 0 0 0 0 0 0 0 0 0 0 0
$$ ##$ShimPowRng2= (0..63)
$$ 1 1 1 1 1 1 1 1 1 1 1 1 1 1 1 1 1 1 1 1 0 0 0 0 0 0 0 0 0 0 0 0 0 0 0 0
$$ 0 0 0 0 0 0 0 0 0 0 0 0 0 0 0 0 0 0 0 0 0 0 0 0 0 0 0 0
$$ ##$ShimPowRng3= (0..63)
$$ 1 1 1 1 1 1 1 1 1 1 1 1 1 1 1 1 1 1 1 1 0 0 0 0 0 0 0 0 0 0 0 0 0 0 0 0
$$ 0 0 0 0 0 0 0 0 0 0 0 0 0 0 0 0 0 0 0 0 0 0 0 0 0 0 0 0
$$ ##$ShimSysFunc= (0..63)
$$ 1 2 3 4 5 7 9 11 15 16 8 10 12 14 6 17 13 18 19 20 0 0 0 0 0 0 0 0 0 0
$$ 0 0 0 0 0 0 0 0 0 0 0 0 0 0 0 0 0 0 0 0 0 0 0 0 0 0 0 0 0 0 0 0 0 0
$$ ##$ShimSysMatrix= 0
$$ ##$ShimSysType= 1
$$ ##$TFXNUM= 0
$$ ##$TRIPLO2= 0
$$ ##$VTU= 2
$$ ##$VTUETH= <149.236.99.20>
$$ ##$VTUTY= <no>
$$ ##$WBREFAM= (0..15)
$$ 132.7 105.7 100 100 100 100 100 100 100 100 100 100 100 100 100 100
$$ ##$WBREFLM= (0..15)
$$ 0 0 0 0 0 0 0 0 0 0 0 0 0 0 0 0
$$ ##$WBREFPH= (0..15)
$$ 76.85 -72.51 0 0 0 0 0 0 0 0 0 0 0 0 0 0
$$ ##$WBSGU= (0..15)
$$ 0 0 0 0 0 0 0 0 0 0 0 0 0 0 0 0
$$ ##$XFAC= 2
$$ ##END=
$$ 
##$DECIM=	5000
##$DSPFVS=	20
##XUNITS=	HZ
##YUNITS=	ARBITRARY UNITS
##FIRSTX=	3200.3900000081557664
##LASTX=	-799.54896483559400622
##DELTAX=	-0.06103515625
##XFACTOR=	1
##YFACTOR=	0.0014108560073739604291
##FIRSTY=	12.86304473876953125
##MINY=	-1.6964260339736938477
##MAXY=	17755.39453125
##NPOINTS=	65536
##XYDATA=	(X++(Y..Y))
3200I117p1p1JJnnmnj0rrj0RQRRp6p7p6p6lkO9P0l8l7l7l7K1K2n1n0J6J7n5n6J2J3J2J2N3
3198H601N2j15j15K4K4r6r6N8N8j5j4k3k4k3k3OONOk8k9k8k9L1L0m1m1n5n5J8J7k0j9N2N3
3196H152o8o7N2N3j34j33Q2Q3n4n4J8J8k3k2k3k2q6q5L4L5j5j5j5j5p1p0M9N0l1l0M2M1l3
3194G643l3l4l3rrrqnmmnn2n2J9K0k5k6m0m0J23j16j97M2J29j6QQq4q4L6L6j4j4j3j4o1o1
3191G002J1J1k2k3k2k2m2m3P8P8j1j1q3q3l4l5L8L8n2n3K0K0NNo7o7R2R2k8k8n3n2J9K0p4
3189F624p4M7M6o9p0LKM5M4p5p5p4p3M7M7k6k7M5M6l5l6l5l5L2L3m0m0K8K8r2r2RQRQn5n5
3187F073O5O6q8q8L2L2j8j8j8j7n6n5J7J6L2L1m1m0l4l3l3l3j8j8N5N4ppq0p9O5O5n6n5on
3185E700p8p8NOR5m9q6N8J11j28q4O0M5r9N7N7j62j8J36pj76l1J28j7m6m6r7r6J20J20o8o8
3183E264J3J4r0N4N5r0n5n5N6N6p8p8M3M2K8K7r3r2K4K4m8m8R7R6j29j29J45Kj76l2J92M8
3181E087p8p8l0k9k9k9L1L1L1L0q8q8L2L2n2n2k8J16J04j36j37J04Q8n7j23K1R6m8j20K4N1
3179D676r3llk3k2k2k2M0M1p9p9L0L0m3m2j3j4k2k3R2n3m3m4J4J4J3J4p6p5M5M5m7m7J06l8
3177D234n5n6N5N6k1k2k1k1n3n3J9J9J0J0RJ0j15j16J00J01k6k6k5k6llp6p5J6J7p4P0P0p4
3175C855o5P9j2j1PPj07L8J06j33j38J02L3j11J6J6o5o5J38J38j27j26K6K5m6m6J8J9m5m5
3173C481o0Q3poP9o5j47kJ63J8j02M2L8j07j6j7p3p3J37qr4N0N0r5L1J75lj46k4k3j22K1J20
3171C298k4q8N7n1n1L0K9MLMLppp9p9k0k0N2J96Q6j54r0N3o8o7J3J4m9n0K3K2ONOOk0k0k0
3169B946j9QRRQrrj0rm0l9m0m0j2j3O0N9K4K4j44j44J24J23r3r3l0k9M2M3n4n3O6O6PPL1j13
3166B663j35J06J06j34q5N9l6l7N8N8o3o2kllkQQQQl6l5l5l5Q6Q6l4l3LLLLo3o3RRj9j9j8
3164B332j9O2O3j06j06L6L6L6L6l7l8L5L4r4r5L4L5n0R4Q6j55j26J8opQ7Q7q1q1R1R2k9k9
3162B235j24j25M3M4m0m0Q0Q0n2n2K1K0n7n6l3J11J91m9k02n8K2K1L1L0q5q5Q3Q3J0J0j09
3160A948j10O3O2j05j05O0O0N9O0j28j27M0M0m5m6P4P4J4J5j06j06P4P5KKj1j1j2j1j2j1q4
3158A692q4J03J02j8j7nmnmk3k2k3k2N8N8j09j10P1P0n0m9nmnnK0J9p6O7J82n8j78O2K2j23
3156A527J3J57j64j64J57J58j05j06O3O3j8j8j7j8l0l0l0k9L1L1m0m1R4R5p4p4j1j1j0j1L8
3154A426L9q2q1N9O0o1o0O0N9j2j3J7J7j51j51J09J09j2j1j2j3j2j2kjkkk2k2k2k3K8K7K7
3152A258K7LLp0o9O1O1n9n9NOP7P8j09j08O0N9o1o1J07J06o7o7NNl9l9L3L3%%p2p2J0RQ1Q1
3150A216n5n4j9j9J1J2o1o1J6J6J7J6l1l2M1M1l8l8L3L4k5k6J1J0qpm4m3N3N4j9j8l8l8kk
3148I03Q1Q1l9l9m3m3m3m2M1M2p9p8J03J03j13j13R6R6k4k4O7O8n3n2j3j3j3j3%%%%k4k4J2
3146H08J3N5N5o5o5J5J5n7n8k7k7M5M5R2R1j73j72P5P5KLK6K6K6K5r2r3J23J24o5o5N5N5o9
3143H21o8l3l2P6P6m4m4l4l4L8L8p8p7R1R1j21j21R5R6l8l7l8l7O0O0j2j2P8P9r0q9P2P3m7
3141G58m8n2n2K0K0K6K6r4r3J38J38p8p8o9o8N1N1J9J8j01j02J18J17r8r8J2J3P6P5jj46q9
3139D09J52O9p5N8N7o1o0O0N9L4L3j34j35J12J11j52j53O1O1j1j1mmm1m0J13J14Q3o1r4M9
3138E99N6q9j29J11N6q7j32J1M2M2k8k8Q4Q3J4j29K9J73m1j85M1J84j13j13P3P4k02n8K16
3136E54P1k09o5O1O1M3M2L4L3mj48j45R6J36j03j06L8j4j3mmoonoJ7J6p3P1J18k6rqn2n1O8
3134D02O8K3K3r7r7J67J67k41k41J93J93k63j19K36nj85J51J13j28l4K05o3o3L3L4r5N0J18
3132E45j21j53Q7R0n3n7n6OPM8M9M8M9l0l1O0q4r9M5J07l6M6M5q3q4k0k0l9J06J20k4j43%
3130C25P2p2j34RQ3Q4p5p6O0N9j2j3P7P6j30j31m8R6R6m8N1N1j26j26J22J21n5n6N8q7q4J57
3128C24J20j19OJ51l6k75MJ48j9j9rj0N6N6K6j17j5J30l2l3ppp9q0Q2Q1N1r3n9Q4onJKP4P4
3126D50PPj04j04o2Q2J54J0j34j34K03K02J0k30j76l1N8N8O7O8m3m2m2m3ppJ54J1q9N6N6q9
3124C16m6R7j6j60p4J67J03m0q6q6K4K5J0J0J00m4l6J09R6j43k11K8J77L1j36j37P0P0J2J1
3122B41J2J1o1o2N8N8Q1Q0q7q8L6L5m5m6N8q6q9J51J49j87j81J55Q5o0J15J15r8r7j0j1o1
3120A71J79J27k08r9J41pj50J17J17j56j57J34J34l4l5J5J6p5O9K07O3j58j59PQQPk7k8k7
3118B00k8K2K2J12l2r9M5J18k7j05L9L9j05q1O3M4M5r9j00K7J70N5q9J0Rr0N3K84M5l04j60
3116H3N6N6L1L1K2K1K2j22n9Q4P5p0o1Q3lmJ4J4n1R4J02m1j69k5NNl5l6L7L6K5K4R6R6m2m1
3114C53l3l3p5O9Q3o0j15J24J24j16r1N2K9K8M7M7p4p4RRj%R0n5o3Q0J14l1r9j00j29J4J35
3112B58j0k5k4l4l3J25J26r1r1L2L2j25J16J89j47k07L3J11l3n7n6llO9O9N1N2j17j17Q0Q0
3110B50m0m0M2M3M2M2l5l6l5l6OOn7n7L8J82k6j69j9J25Oj39L5J80J1j33k6J18L6j07m5m4
3108A18N7N8O9p5k48qJ46J47j5j5J32j2n1n1lmllk9k9j10L4M1M2M1M1J9j25k6K14L6k05j89
3106fN0P4P5Q0Q1Jj43l2J11M5j00r1N3J3J3K2K1n3n3n3n4M9M9M9M8j2j2j2j2m1m1m0m1J18
3104A56J18M0j04j19K5N4N5j2j2Q4o0j21J18J25j16j38J02J01j38r8J42J36j04j58j4N9N8
3102A79q3q3J33J33l2l2k3k3o8P6J45r5j82N9K9K8j8j8M6M5O7p6p4J67L8k03j3J30m8m8M2
3101A98M1j02M2J13l0J4J4j63j62J21J22m6m6J00J01o8o7LLq7N7Q4n9j31J2J69K5n4n3K3K2
3099A96K3K3l0l0l0l0M8M7M8M7l5l5l5l6n1n1O9O9j7j7N6N5r8r7k6k6P6P7MMK5K4m8m8L8L8
3097B27L8L7o0o1O0N9o5o5J03J03k5k6r7r8O7O8nmk2k2R8R9q1q0qrk9k9l0k9K1K2K1K2m5m4
3094A11K8K7L4L3L4L3%jj21j21J18J18r8r9J40J39j24j25l9l9Q1Q1k4k4k4k5j6j7q8q9J49
3092E2J50j9j8M9N0p1p1QQQRonO7O6n4n4J8J8J2J2J2J1l5l6l6l5L7L8L8L8p0p0N0N0J0J0p2
3090A69p1N9q6p5J63J16k8n3n2M7M8p3p3ppO5O5J4J3j16j15J58J5o0J80P8k58j17J22j5j5
3088I1J20J19o5o6o5o6O0O1O0O0%%j21j20L3L2L3L2l7l7Q3Q2n5n5J6J7noj4j5K6j18o1J79
3086A98L4j10J06J06j73j72J38J39l9l9j12j10P4P5LKJ%p2p1K15K17r6r6o3o3J04J05rrrj0
3084B64j7j7j8j7m8m7K4K5O5O6n5n4MMMLk8k9M4M3J5J5j05j05J52J51o4o5j3j4j33j33J80
3082I7J80q4q4O2O2j07j06NMJ04m0k36N1J91J92q0q0qqk0k0N2N2o4o3N6N7j09j07J54J55n0
3080B08n0K1K2j6j6m3J01J12j76j84J02J90r8j62J27O0q4J5J5OOOOp1p0KKJ49J48o7o7NON
3078B10Nl3l4l4l3O1O2n9n8RRRRJ9J9J9J9p1p1R7R8q2q2rrN9O0j3j2JKj18j17R7R8k2k2K0
3076A03K1n2n2J11J10o7o6J42jj30J4J38oj26J9O9p5p6O9N3r2p4p2P7P9POO1O1o0n9J30J29
3074C91nj50o2o2M8M9NNn9n8jJ43L1j12m6R7K5j18q7N7k4k5J6J59O1j80q3J56J51r0J0J54
3072C96j10j10L5L5r3r4O4q0J4K53M3k93p6K59M6j94qJ37M0j04r5M9N5N5N4N5l5j80n9Q5J8
3070A62J8N0r3j40R8J77o3j92M9J95N2l0l0l8l9ooq8N7j8j9J5J59M4j96p0P4P2p3p3P1P4p1
3068A22p0P3K6j19l7J06P6P5N5q9j17K8R1n3q2q2P7P7o6o7J1J55J02m2j05L9L6L6P0p5j37
3066A14J03J81n9k30J1J57J3j09j09KKK5K5l9l8n0R3J03m2QJ53L2j12j37Pj1j1L5L4J9J9Q0
3064B69j59j68P0J38pJ7J7l9l9J29J29j92j91L8J83l9m0N0N0j41KK18P4n3n3R9m4j39NL5L5
3062B54l5l4l5l5p8p7J37J37o6o7J01J02j45j45P2P1K0K1j00r9J38J39p7p7K0K1K1K0l7l8
3060A29N8q6j06J31J98j37k24J11K04l5q1q1K4K4klO9O9r4r4P3P4p6p7M4M4m2m1P8P9o6o5
3058I9POM1M1q0p9J23J23j41j40M3M4M3M3l3l3l3l3J2J2J2J2K5K6K5K6r6r5J21J21j40j39
3056c7P5P5L1L0L1L0QQp3p3N2r3p1K16R0j98l0K59J09j79j52qP4P5q5q4K0J9p9O5J93r4j75
3054B9J12J75j14j14J74O6k21L6J80k6j69q0p9Q9R0J8J7J8J7n4n5R0Q9l0l1m0m0L2L3p0p0
3053G2N0N0l4l4P5k13j63J25K74j3n1n2M2M2L1j13o2J78J23j16j10J29pj50L2J76j00j01P7
3051A57P7ppqpJ7J7J7J6K2K1n1n1l4l5k5k6k1J23J7j26o4J77M1j03K1K2p7O6J62J7j89m5K2
3049A36K2L1L1j7j8j8j7%%o2o3k1J23O0q4o6P8P9o6p6O8O8p5p9O5M8M7L4L5p7p6o7P8O9O9
3047B59o3o3o3o3L9L9L0K9J21k3j11j10L5L5K7K6N6q8q8N6N0N1j3j3l4l4Q6Q6rqrqj01j02
3045B2J15J15q5q4L5L5m9m9P1P2k5k5k5k5j0j0rj0n5n3J7J8P6P7ONPPo5o5L7L7o3Q2J75j13
3042A89j43JjjQQNNNOkkP1P0o6o6N3N4r2r3K7K8jjR8m7j61J25K06q1j73J15J7j28L5L6p3P2
3040A03J08j81o8K17J05j83O9O9m9n0n0m9N5N5o5o5L6L5q4q4J96J97o8o8m0m1L2L1p5p5R3
3038A06R3p8p8ooM8M8k4k4O6O6n4n4o5o4J51J51l8l8l8l8l4l4l4l3P9P9q8q7J43J44j20j20
3036A9Q5Q6l5l4jjj%mmj3j3N3r1q7J51J71p0m0m0kjkjmnmmQ0Q0j36j35M7M7M7M7j89j90K18
3034B4K18r3r2K8K8m0l9L2L3P2P1m8m9l4l4L8L8k8k9R2R2j23j23R3R3l9l9l9m0j5j6j5j5J15
3032A17J15n3n3nnnnj0j1MMj40R9J80n9q1O4M8r6M5M5l7l6m6m5m5m5J18J20r7r5N7N8j4j4
3029G7P1P1m9m9J9J9J8J9q8q8j6j5N5N6N7N6n3n3J9J9L2L3q8q7R8R8j18j16p0p0J45J46K5
3027A73K4m8m8klO9P0j27j26Q8R0j42j41P4P3qqJ13J12o7o6NOk7k6k6k7k7k7J39J40r0r0j8
3025C2j8J0J0o0o2L9L9L8L9n1n0O7O9l8l8l7l8J20J21JJj0rrrn8n7J5J5MNNNk7k7k7k5L7L9
3023F1L8L8m1m1m1m0j3j3N7N9l8l6l7l8J71J72j40j39J06J07o0o1j02j03J12J12N3N3o7o7
3021F2n6n5J6J6j3j2N9N9l0k9k9l0R6R6j20j18QQQRJ2J3J3J2k3k3k4k3R3R3p5p3R0R1j24j25
3019a28J44J45k4k3q7q6j4j5%%K4J67J26j14j70k7Q2Q2p6p6j0j0j0j0LMJ22J24r8r6K2K3k
3017hjkjJ2J3J3J2rj0rj0N9N9j3j3K2K1n0n1r5r7K4J66J05j35q1O3P9o3K7K6q6q8Q1P9P9P9
3015A97q9q9j2j0q3q3J18J17kkL8L7q3q2P0P1m9m8Q0Q0q8q8R6R5k4k5m2m2L1L0k3k4J3J3p8
3013B0p7J85J86j67j67M8M9K0K0n1n2K9K8K9K9l7l6j0j0J06l9j79O0K30j0k19K0J05m0r2J46
3011A24P9j61m0J99L9k01j2J33n8n8P2P1mmm0m0n1n0O8O8q9q9P8P8m1m2L1L0M9M9j20j18O3
3009A3O3j03j04J55J56j1j2p4p4kkK2K2N9N8j02j00l0k9K4K5R6R7p7p6noJ25J26r0r1p8p9
3007a04Q9Q9J2J3k3k3kkL4L4r1r0P7P7J8J8n4n4M5M4p5p4P9Q1l9m0l7l7j3J29P5j64j56Q4
3005h0R6R7j03j03LLP5P4q2q2K8K9R2n0j14J25Q5o0j15K8N6N7j01j02L4L5P0P0M3M2j25j24
3003i9R8R7k1k2j51j51J12J13PPk8k9j8j7j8j7O5O5n4n5M6M6k6k7O8O6M3j00q2J57M3j96n8
3001a36J81qj50Q3Q2m7m5M7M9q0q1R6m9q2J58N8j80j04J36J19k5j38NJ25j8r6M7J52q7j65
2999a53P5K09l1j97M1J31j07k35J02K04l6j36OQ1o4o4Q0J37oq3q4J38J40k9k9P6P5k69j26
2997a54K09K10j89j88J01J00o7o6k7k6k7k6J46J44N9q5j05j03R3R2k8j72p4J67J20j17n0R3
2995C0m8n0l1l2k2J21J1j34j6J28l3l4P6P4m3m4O1O3N4N4nj49NM%jk4j67q1J58J58q1m7R4
2993D9%%nnnnJ00J00k6j71p4O7O8p5n3Q9R0n4j12L1m9m9L7J80O2q3j26j26Q1P9KJP4P3o6o6
2991C3L0j13j17J23J40lj16K6K7j16p9O5M7M7J14J14j40j40N1J94j3j56kJ42j9k0k6k5k6k6
2989A6L4L5L4L4o4o3QQQ4Q5l6l5j01r9l5K05L4k04O9K15l7j81P8P7k3k4k3k3P6P7j00j01J38
2987A58ok36LK01N8j10L4J6k24j04J36J83M1l2l2l0l0k9l1J08J09j1j1mlmlJ3J3J3J3j09j09
2985a9J05J06j43j42J19J21%jjjJ4J4n8n9K5K4r6r5O3O3n6n7M7M6M6M7n6n6O5O4j1j1j1j1
2983H5L9L9q2q1kmllrrJ58J59k7k7r9r9jj%jR7R6o2o2k3J21J6k23o0Q4j1j0K2K3o6P6P3p2
2981E1o1Q1l3l2M8M9p6p5R1R2o4o4R5R5n6k00n3J85J05j35o6P7L6L6k7k8LKR2n1p1P3Jj43
2979b3n2R0o0o1P3K17J0j33k9J15nj48k7J16m6m4JJJJmlNNp7O7O6p6m4m4J9J9J20J22j43j41
2977a12Q9Q7QPO3q1K3J68L6k04q4J55P6o7j40j38J8J8J8J8J05J07j10j08M3M3M3M4M8M8j11
2975A10j10l6J07J08l6p8p7j5j5Q0Q1q7q6OPKKkp3KJ45j6q8Q0Q1q8q7J22J23j01j71M1J85
2973A16m3j87K9J71O0q5P7P7p6p5M4M4o7o8NNJ30J31j81j81J68J69j45p3J14k9k07L2J94N2
2971B01o6Oj3q5L9J11k7k7R7R8j31j30L7L7l8l7L4L4mlmljkj13j11PJ51Q4o0l9L4K9m3o4O
2969DP9Oo5OP4Kq4q3L1J01Q1o4j34QJ02L1l9l9L0L1Qo4r7M6L1L2K8K8n3n2R1n2j31J1R8m5
2966d3m6R8N8q5L4J07q0q0O6O8%J%%p8p6N7N7j4j58k3J20O4p9J9J8j16K7J78L6j20K4J50q9
2964I5j79l6R9R8P4p1o1o0QQO9P1l0j72l0J14P8P8n7n7KKo9p0J03J04m0m0L1L2m1m1n0n2R2
2962BR3o8o6P6P6o6o5o5o6N3N3j9k0J02J02m1m2J0J0J%R6m9j20K2L8L7r7r8P3P2p0p1P1P0
2960C4jjn9n9Q4Q3q9r0N3N3qj0Q0o4o0Q1qpJ9J9J1J0L8j05j14L0Q2n9n2R2kkPPklQ7n6q2O0
2958cJ20j19j44R7K33nj43KJ40nj21K2K3j20O7K12l7j81Q3Q3p1p0L5L5n5Q8jj45jJ42J10l4
2956B37q8q9q7q8N5N6J8J9J0RJ08l7j80l7N3N2j0rL3L3j10j10J56J56lj47K8K7K8K7j22J9
2954GJ74K9k69j26K14P2j51Q6J00j39j30K05Q4o1ooj76l3K03O0q4O0J3j30L1L1OOR5m8q8N6
2952H5N6q8n4Q8Q0o3r2r1M9J92J9j25l5l4q3q3J57J56q2q0O1O3q8q7L2L3mmNOr7M7J81n7r8
2950c5M5M0j03m4R9JKL4j09k36MJ28J28k6k5P2P1P2P2j08j07J2J2kjkkk0k1k1k1l5l6J32J32
2947A02p5p3J32J32n6j99n4J86J54q5k47qJ48Mj56j4J28j5MLk5k5R4R4o7o7o7o7J10J08j0
2946H9j0rqqqQ0Q0j36j34O9P1m9m8J2J2J2J2p1p2M8M8N5N5o4o4Q5Q6q2q1j0j0J09J09p1p2
2943B5R6R6j71j70J89M5j75O4J83n6r4N1L5j09K7K6n5n3O3O3n6n5O6O7n3n2M0M1M2M1j09j08
2941e6l7l7O4O4R0n4j10J76J14j74j15J72J00j88j51J35m4m5J39J40p6p7M2M2l0l0j8j8N4
2940G2N4J3J2M0j05j58J29J29j59o2Q0j9j8PPPPr9r9J63J64j05j03J11J11j53j53J58J58n3
2938A36n3j24j25M8M7M8M7l1l2L9M1J8J8n4n3N0N1o9o8M9M7p0p2J20J21r6r4R0R0k9k9j3j3
2936C5j3j3j6j7N4N6l7l6L5L6K8K8j40j39J15J14n3n2J31J32m2j86j88m5J29J28o3o3N7N6
2934C1l0k9J31j2j87m4Q1Q1m0m2L1L0l5l6Q4Q4r8r8O9O8l6l5L4L6m1m3O8O8J16k8j06j05m9
2932h2R4J76L1k28q6J77L5j54j1J09l5l2J11kj46m3J96P1p3o7P7P7o8j26J9%%M8M8k4k3k0
2930D9j9j9j9o6o6J49J50o5o4PQr9r9J16J16l8l8l7l8O0N9n8o0N9N8o1o1J27J27m7j89j8J25
2928D9M5r9K2K2J3J3q0q2lJ39M4j00q3q3JJJJL0L0L0K9O3O5O4O4j37j35L1J74J2k28m5R9k1
2926e4k2J07J08r5r4r5r4J11J12L8M0m7m5m6m6N5N5N4N5n6n6J5J6K9K8m3m2Q7Q9PQlj47j37
2924a08J02M4r8q3O0K4K4L3L2k1k0k1k1M5M3M4M4p0o8KKl5l6L7L7k8k8k8k7O7O7j00j01J19
2922f7J17m9m9J4J3J4J2M4M3j24j24L8L8L8L9L7L8l4l4J7J6J6J7kjp3p4kkkkM2M2j27j26J31
2920a26J31N9O0j12j10N6N6RQo2o3PPPPN2N0j15j17j3j3N9N9O2O0j0rQ8Q9j75j74M8M7k4k4
2917a26m6m5P5P4LKP3P5k1k0k0k0m5m6K6K7J5J6J5J6J5J5J5J6o9o8N0N1q8q9J26J27r2r1K8
2915b6K7M4M4p6p5N7N6j4j5PPOPo4o5N4N4J2J3J2J2j16j17N1N2K7K6K7K7J1J1o2o0J03J04
2913A61j12j11R0R2p6p5M9N0o8p0ppJ13J13k0k1r2r1j0j0j0rO6O5n4n4m9n0K3K2j4j4J06J06
2911C2l4l5l5l5M3M3M2M3m7m6m7m7M0M0M0L9j16j18N1J93J07j33p9O4Q9n5j65k3L8L8M7M6
2909B0KKKKj5j4M7M9L3j11j19K4J34rj67k4J25J23j20j21l7J08l6l7L2J74J6j27o7P6j3j4
2907f2L9L8L9L9m7m6m6m7L2L1L0L2l9l9l1l0j5J27J8j26p7O7J77L4o0o0N0N0jkkkm1m0m1m1
2905i2P4P2JJo4o5PPONNNL5L4J17k8o7o6mmP0P2j6j59lmj2j3O5O3n5n6M8M6j19j21O3O3j0
2903i9rN5N5j12j13J84J84j28j27P3P2r5r5J23J23r2r2j9j9N3N3k6k7k6k7P1O9m9m9qqpqQ8
2901c2Q8l2l0m0l9Q1Q0j04j05O3O3o6o6J48J50j03j02J03J04r1k34l5K05M7r6p3p3K9K9K8
2899a03K9J2J1LKM0j04j01J39J32j05j01J39J10l3rj0J3J2n9n9R3R3j69j71J03J01j12j14
2897b18J18J16r7r9J09J09j06j07O9O9n2n1K1K1J1J2J41jj90M9K55J7k41k42R2R1k9k9L4L3
2895i5R5R6r3k36PK45O2j76l7J07JJJ0J0L7L8q1q2O7O5j00j02J00J00j15j16K5K5K5K5k7k7
2893a46k6k7J02J02L0L0j01j02O5O6PRL3j11j23J17K22P8j80j79P5P4OPo4o5P0O9m9n0O7O8
2891G4n1n1QRQQj2j3j3j2J1J1n2n1L7J81qk46p7K59J27j12j51ql1l2R6R4R6R6j49j47O8O6
2889C3q6q7j4j5lkJ17J17J7J7n5n4j7j7j7j6L7L7L6L8p1p3%%J1J0J06l8j23J14J16j23k5J18
2887H8n0m8K6K7j40j41J38J37p8p8p0p0N0M9L4L3L3L4k8k7M5M3J6J7n5n6N8N7j00j01K0J62
2885B5J6k23j14J26J29j5RRP1P2q8q7ppo1Q3K17k3j89m6K6K6MNNNrrrqrrq0q1M6M7k6k5P9
2883a25Q0PQM2M2p6p7O7O5n2n3N2N1k0j9nnonK0J9J9K0j01j02J15J13k2k2k2k1q1q0L9M0K0
2881g5K0n1n2M3M3N2N0j61j9J57J4q1O1J23j18m6J92k2k62n7J83q7q7J73J71j80l7J63K0j39
2879iNJ2J2q8q9j14L1P0O9J13J15j40j41L6J79J08l6j27j25L2L3M2M2J33j1j78l4J32j0j38
2877g6OP7o5j18K5N5N6N7N9o2o1R1R1p6p6O3O5j04j02N0M9k1k2j0rjjo5Q0Q8n5r4M9L2L1r6
2875i0r7j8J25Q7n5m7R5n4n5Q4Q2k22p9J94N0r1N3N2r0o1Q3P3o9r1r2J07J06K9j13k4k4q0
2873b32O4P3p1k9J15m7m7P1P1n9n8J02m2p9O6j0j0P2P0p9p9J36pj81N9J36j02j02J37Nj39
2871a96N6J99k6j68O5O5j6j7m0m0K2K3J33j0j45j45J27J27m0m1L7L7l4l5J8J9r3r3k0J23Q8
2869b0n6JKq0q0K26K26j40k83l3J12M9M9l4j77p8J62K18k2j40R8J08j30j25J15Q7n6q1q1M7
2867a16M6P2P3j6j59r7M7O5q0q0O5J05l9j01M2L9L8J2J1n8n9O1O2o0n9J09J07p3p5l6J09K7
2865a8K5%jj0j2j1j2p3p3J43J41r5r5o0o0J17J16M4M5j01j00q2J57J66p4m4m2j5j6N6N7j28
2863e5j28Q7Q8l9l8kkN1N0o8o9R1R0k9k8l0l0OOK9K9m2m3N5N3o5o6J33J33q2q2J4J4k3k1J3
2861@J4k0k2p6p6R2R1l4l6L7L5M2M3p8p7j8j8N4N3qj0l7l7m7R6J58q1j75l2J68K5r4r5O4O4
2859c5m1m2J26J27j16j16N2N0k9k9M2M1q4q5L5L5R2R4j22j23K9K9K8K9L9M0MMp3p2jjJ3J2
2857d8k3k4K0K0J9K0%jj%J3J3J3J3O1O2j55j54J03J02j12j13J13J11n5n6R3R4j22j21j1j1
2855a37J09J08p6p4M4M4o6o7J02J00j12j14PPP4P3KKllllL8L7q2q1M6M5k5k5PPqqR2j47k17
2853c07J19K14k5p8O6Mj40o7P6l1j76Q8K33N2q9j9J25Q1o4r2r4J27J27j84j84J68J67j05j05
2851a13Q1o3j26J14J23j9j24J9J6J6m7m7K2K1K2K2L4L3L2L3l0k8M1M2j04j06J11J10j63j63
2849b41J33J32O2j77j33J1Q4n9o0Q4R3n1L9L9J5J5n7n7rqO3O3n4n4O6O5J0J0o1o3m1m1J27
2847e5J26j43j44k4k3N1N1N1N1RQRQK1J9n1n1n5n4J61J7k61k2K48Rj98M3J42kQRjjLKj18j17
2845b74L4L3L4L4M2M2M2M2j55j56J08J08p9p9Q9Q9j5j4j5j4o9o8R9J00l9l9l8l9R7R6j20K4
2843a00J11j28j35J06K05l3j80l6L5L6M4M5q3q3Q6Q5J1J2o0o0J58J60j53j52N5N4L6L6J32
2841B04j57j65J22J00m5j7j7n4n4n5n5P6P6m4m4J03J03o2k05l6K51J23j64j2j2l0l0R7R7j66
2839g2j67J46J45p0p0l3l2Q7Q6k2k3k3k3q3q3L7L7L6L5L6L6n3n2J9J9l2l2M0M0M9M8p0p1L5
2837h0L5m7m6l1j75j0K77J43j44j18K6j3j3P7P8j56j2K07q0k16P2J93r6j41J47J21k4KKj28
2835a50j27K6K5K6K5P8P9m2m2O0O0n8n9M1M2l1l1j0j1j0j0K5K6m7m6M9N0N0M8o8o9J8J8j79
2833b44O1K37kj51rN8q6q1O3L6L6R9m4j26J8J14k9j2j1L9L9l2l2N9N8j08k54K2K61J05k30
2831a46j09J31N6q8j0j0k8k8J11l3j14L0R8m6j10L5J02J02r6r7%J44j5j59L3J78M8r6QQp3
2829a74p4L1L2L1L1j09j08O6K09nj50J2J3M8M9k4k4M4M3p7p7Q7Q7J4J5m6m5m6m6ONONL8L8
2827i5l4l3P8P9q9r0M3M3l8l9R6m9n8Q6R7m8j11L4j3j3O8O8p0p0N0N1k2k2Lj42l3K08J34j04
2825c5k9J13n8k04J2J57n4n3R8R6j17j18N7N7M2M1N0j88j35RJ31J30J4j29n3R0Q1o1LLooL9
2823b3L8l2l2j2j2N1N0p1k16Q1K25%k38n7Q8QRJ7J7k4k3M8M8m6m6K6K5j4j4N8N8o8o8J3J2
2821a24j34RR7R7k8k8k8k8O7O8j42JJ61J5j14J24J15j25n6Q7r2r4M4M5j13L1J71o6j51R0J40
2819C9mq0q1j81l6J80L6q5O0P4p1o1Q2j0j1QQp0P4J46Kj18j20M0M0l6l6Q4Q4k8k9k8k9jjP0
2817h9P1PQOQj47j48O8O8k6k5k5k5O5O5M1j03o1J79K32j03k05o2N1N2K7K6m5m6J00R9j15j16
2815a68N5N5o5o5J00R8j15j17Q5Q5q4q3Q1Q2l9l8n9o0O1O0P2P0r5r7J1J0J0J0j0rO2O3o5o5
2813a64J03J02r9j01K0K0l3l3l3l3K6K6R7R8q7q7Q2Q1j61j62PPJ57J56j1j1p0p0r9J40J92
2811F0m8o4o5j0rj0rK3K3K4K3m7m8P3P3k7k6l6l5L7j07m4J00K5j18k0k0L5J79J28j11j27J13
2809f5J07j32j24K0L4L5O2q2r1N3J62J7n4Q8J8j25j18K7N5N5qqK4K3m8m9n3n3J15J15j16j16
2807b32J09J09j35RJ38oq8N5N5q8J8J60r7r6RQq8N6J18j20k41%J62J9n4R1Q2j58n0J90P8k57
2805b44j37J99Q8j51o8J72M7r6%jM2M1k2k2m7R7n6n7N7N7o4o3L1L1K2K2k7j70k4K17K15k4
2803F5j69k7j%QQq0q0M0M0J8J8nj50n0J89J18j23J1J55o0o1KKq8N6P7o8n8Q5o8o7J09J10j38
2801a82j38P8P8MLK1j23n1R3P5P4o0o0o9P5M1M1p1p0P9P8m7j92k3J20L0L1M7M7j63j9P0p5
2799b58kJ42K9j14j6j6j02M2J23k0n7Q7P8o6n0n0p7O7J02m2j03J38J08j31o3Q1mmNNK0K1r9
2797b26j00J35J35j21j20l7J07K5K6NNNNM9N0j57j58J02K46j7j62N2N2k9k9k2k3k3k3L7L6
2795a75K8K7N5r0j70k7K23Q0j43j43R0Q9R0Q9j37j39L0L0j5j5j5j6M9M9k3k3kkr8M6J82n9
2793a35j72k8J56J2j8j8M9M8k4k4rrqrNNONm0m0Q1Q0n3n2J9K0m4m3m4m3M7M8M7M8p0o9N1N0
2791a75n0n0J18k6j92M7K22j9j29J10J04j36p4P0k7k6%%%%j1j0j1j0k3k3R7R7m1m1m1m1rj0
2789c10J11J11JJp1p1m2m2P8P8RRo3o3R6R6k4k4o9o9J00R9j27j26J38J38o7o6n7n7o4Q0J44
2787a23r7l3J10J4J5m8m9m8m8L7L7L8L7l1l2Q9Q9k0j9k0j9j21j21n5J85K02l9r8M5j5j59l1
2785c28J14M8M8j5j60q3J57J50j85j38J99J33j08p4O9k6k6k8k8M4M4j1j1j1j1J05J04j12j11
2783b51j6j5J04J05k3k3k3k3M7M7k5k5L1L1m2m1j55j54J3J58K62K2k89n0K25Q0q7q8k6k5k6
2781b82k6M9N0k2k2K8K9m3m3L6L6L6L5k5k6M7M6j08j08J08J08p7p6M3M3k2k2k2k2N3N3o7o7
2779b80J6J7J6J6O1O1j06j07O0O0O0O0o2o3o3o3J22J23m6m5j3j3j2j3j5j4l9J05J81n7j24
2777a77K0M9r5k3J21M5j00rj0j00j00O8O7R1R0p8p8O0N9o0o1O9O8n1n2k5k5m9R6J10j30o7
2775b77P7K4K4L3L2p5p5R3R3j22j22J42J42p4p4J42J41j55j57O0N9n1n2K1K0j2j3q5q5J22
2773b04J22m6m5P6P6r1r2J05J04o2o3k4k3k4k3L6L7L6L6n8n8J4J4MLnoO2q3j45R5Q7n6n1R3
2771a59J05m0o9p0n1n2J17J16n0n1n1n0M5M6p5p4N1N0N1N1O1O1n9n8m5m5K7K8J1J0J1J1P2
2769g5P2r5r6R2R2j25j24J23J24j41LJ73o4j92M8J83n8o9P4L4j10k0k0J08J07j55j56N8N9
2767a50j4j4j6j6J04J03j03j03J61J59k07k09J7J6j5J29J82n6q4q5K1K1M1M0l2l1O7O8n3n3
2766a12J5J5J5J5m6m6p1P4J42r6j69P0Q7n7L9L9q8q9J37J35j58j5J73o5k15K6J33j0o4Q1r
2764a14ro2o1N8N8J8J7n5n5o0n9J09J08k3k3l2l2N1r4j03M2J10l5m0J04M6j93p3J66P6o9J0
2762b19J53J08l6o4o6m4m5oJ39n7n6P2P3j09j08J49Np7O7O7p7m1J04n9n9MNr2N2J27j13m6
2760b49J93O0j78JJ46J5j29l0l0k9J16J12j27j68P3Q4n9j08L7J14J15j13j13l4J09J36pj19
2758a82K5j4j4N9N8Qj35J8J7MMQ5n9r4r4p3P2K23Q0j43j42P7P6r1N2J32j08j71O9J04J04j31
2756a84j30q4J56J12l3r7M7L7j06K3K4J4J4mmlmQRQRJ43J43j20j20kkP0P0k9k9k9k9onLMr3
2754b19N2K60k6k07o3J02J01j42j43K6K5K5K6K5K6OOOOK1K1p8O6J23j64j74J14J34j53j54
2752c52J35K08q0j17j16O1O1O0O1p7p8R1R0k2k3l1l2L0j14j41J47K07q1j02M2L8L7M7M6j58
2750a63j58K02K01j63j64N2N2j5j4j4j5Q5Q4l5l6j6j7j6j7q1q1L9L9P8P8m2m2k7k7R3R3q3
2748a30q3L7L8k8k7k7k7N6N6j6j6N7N8j5j4q7q6Q2Q1m0l9l1l1q6N9R8R8j1j0jjj07L7J09l4
2746h1p6p5Q4Q4m0l9L2L2q7q8P1P2J5j30n7Q7N7N7r3r4l9J04M2j03oJ37k5j68j6K24N6j84
2744b47l0J13J7J7rqrrJ0Ro3o3P2P1j%P6P4r1r2J5J5NOrj54OJ50Q3o1K9K9J7J7n5n5j8j8j8
2742a79j8J07J05j56j58j6j7J42J42l8j81K5J69K1j23n1R3N8q7LLK3K3K2K3NNj00j00k0K21
2740e4J08j29j16K9o8o7K5K5K5K5L1L0m1m1M7M6k6k5j%%%R3R1p4p5P3P2j42j42J10J11j05
2738a65j06K9K8K8K8L6L5l6l7MMMMmmmmJ9J8n3n4J5J5J4J5O1O1j07j07j2j2J55J55r5r7k4
2736a93k5L8L8l4l4j2j2j1j2M9N0k3k2o0o0O0O0M6M6j22j22L4L4L4L4L5L4L5L4r0r0P8P8l0
2734a35k9k9l0L1L1L0L1mmp6p6POPPN7N8M8M9j04k49m7J92J16k9j00j01N7N7N6N7P6P4r2r2
2731a50l5l4Q6Q6j08j07J08J08j13j14OPJ19J19m9m9l2l2l2l3O8O9n2n2P3P2r5r5N4N5o6o5
2729b83J00J01j9j9l3l3l4l3N2N2o8o7M5M6k7k6K9K9K9K9l1l0M1M1JJJJk5k5k5k5O1O1o0n9
2727b02ooonO3O3j05j04L3L4L3L4RJ0o3o2J2J3J2J3L6L7L6L7j14j13N4N5L8L8L8L8m2m1m2
2725a75m2j19j20R7R6Q3Q2q5q6M0M1M0M1l1l0l1l0nnMMj00M5Q3Q4l8l8P3P3Kj42p9O5M9r6
2723b50l5K05Q5j53q5O0m3m3Q7Q6k1k1j2j2o6P8J46r2j56Q4Q7n7l2l1m1m0J6J6J7J6rrrrp
2721b50oO5O6M6M6j61j61J7J61q9q8J67J67n8n9m8j93m5J94J12j28K2K2m6m5J64K1j70k7R4
2719b10n0j1J32N1r2k8k8o2Q3J12j29p5P0M5r8%%j56j2K61J17j29J5P5j65n4J86l6k76N6J99
2717b09j12j13J34J35j24K0R2n2n2R3L0j15j5j5o7P6J96N3m4m4n3n4P5P4r3r4LLo9o9J90J89
2715c1j23j23l5l4J33J34QRj11j11MMMNJ27J27q9q9m3m2m3m3M9M9J4J3l1l2Q9Q8r0r1L8L9
2713b27j02M2J06j35j24K0J40J40NNo7o7J2J2J3J2L7L6l6l5j0rm6m5M6M6k6k6R9R9k1k1r8
2711b25r9P0O9m4m3O7O7Rj35j62P8Q8n7n0R4L9j06lK37J44j90k02L7J17k6j32J2J48J47j08
2709a59j07k8k7M4M5J5J6J5J5j2j2m8m9O5O5n5n5L2L3m0m0M8M8p8O6Q5n9j30J3L4j11MJ48
2707b19L5k06k2J22k4k4J06J05nnnnm1m2m2m2J1J1k5k5O4O3qrKKl4l4j8j9J41J41m9j92O2
2705b30K07j44k89L3J76rj0J53Qj56j57J2J1J1J54Q2o2l9l9K3K4j6j6j6j6L4L4Q9n6j78l4
2703d16K22P7j68j68J74J74rj53p2p2O7O8O7O8lmOOj40MR1R1p4p3p4p4J53J52o3o3K7K8r2
2701b43r2P6P5MML0L0M9r6j00M3J07l7llj2j1qppqj2j3j3j3n0n0P0O9J7J7J7J7l8l9L4L3N
2699a58No7o7l1l1M1M1Q8Q8q0q0J9J9j01j01k7k6J42J41q9r0P9P9p4p4M7M6L5L4l7l8l8l7
2697c42L4L4J%l5l6N0N0N0N0m5m5j17j18Q4Q4l7l6L8L7q2q2O5O5K9K8RRo4o3J3J4Q6Q5jjj22
2695c11j21O7O8n2n3J13J13j04j03P1P0m9n0k2k2M9N0M9M9k3k3p4p4R4R4r7r6K3K4J8J8n3
2693c57n4K2K3N8N9m7m7P2P3r7r7k6k5R5R5p4p3N2N2o8o8ooK2K1L5j08n8J83J67p4p6O8kl
2691b69PPM7M8k5k5J8J8n4n4Q1Q2j35j35R5R5K3K3q5q5L5L5n0n0J17J18p1p2p1p2L4L4L4L4
2688b68n6n6n6n7M1M1M0M1P4P3m6m6j%p2p2L6L7%Jp7p7M3J88J09j31k2k3q0q0J36J36m1m0
2686c05mmL4L4kkJ0RJ0RM0L9MMj21j20R6R6o0o1O0O0m4m4O7O7L4j11l0l0jjjkl6l7l6l7Q1
2684c35Q0l9m0M6M5l6l6J02m2j22K1J39nj17K8N1N0N1N0l3j77n7Q8M0M1k2k3Q7Q8k4k4q1O3
2682a43Oj38j27J14J70K6o4o4jjO0O0o0o0M9M9p0p1MLMLn5n5J52J52kj45p4P1%%RQm5m6K7
2680b54K6L6L5l6l7rrrrJ25J24m3m4j13j13J3J57O4q0p1P3j7j7JJj31J4R4n0q3O1J73K8p6
2678a76p5q4q4N7N7j5j4N5N6N6N6o3o3o2o3J23J24j41LJ83n7j89N1J73j63j64J73J50r0q7
2676b73N6R3R3j14j14K4K4K4K4jjp4p3J12J11n6n6onJ15J14j16j17N1N1oopo%jjjK2K1n0n0
2674a99J4J4J4J4n3n4J9J9N1N1k0k1j8j7j8j7MMMMrj0rrq5q4J80J80o4o3o3o4N6N6j7j6N2
2671a74N3j16j15J5J5J5J5m4m3P6P7j19j19J93J93j28j28M0M0J08J09j56j56J4J4J4J3Q4Q4
2670a26l7l6J7J8n5n4J7J8J8J7l2l1Q8Q8p7p7nnj2j2k2k1J48Nq3q2OOP8P8o8o9O1O1j49mJ78
2667a55L5j48R2J28j12j01M3J9K0J3J3j07j07J19J18M0j04r7M6P6P6O7O7j1j54j66k1J37p
2665a81j29j30P7P8NNn2n1j6K24J72j62k16K4J16k7m6m5N6N7P4p0j43KP1P2L5L6j9j62n2R3
2664c04J19k4o7P8J36j04k25J6J68K4r0N5J20k4ooj20j20J44J44j10j10N7N8nmM9r4p3P2J44
2662a02%j61j7J2J3KKKKr6r6J21J20j06j07J58J57p8p8noj5j4nol9J05P8o6j25J8J44J45m3
2660h6m2K9L0m1m1L1L2k9k9r2r2PJ52J42r8j17K6o9o9J01J02o6o6j2j2j2j3M1M0l1l2OPP9
2657b24P8j3j4K3K3k1k0q3q3J7J62M1j03j9j8M4M4o5o5N5N5l6l6RRJ0J54J02j37k07L3J39
2656a46J38L1j11j21K3M0j05l2J11L7j08k7J17K2K2nnRRj11j11N0N0k2k2%jp2p3Q1Q0RQQ0
2653a55Q0l2l1q7N7J48j41j61j7J48J48o1o0J1J1n9o0O1O0l0l0ONO6O6n4n5LLL9L8q4q5L6
2651b16L5k6k7J41J40j55j57O0N9o0o1J2J1J0J1o2o2J25J24m3m4q6q5Q2Q2l7l8K15p4j96R3
2649b29K13p6k61K6M8r6N1N2k9k9K5K5j0j1L6L5J07J08q9q8Q2o1j72J16R8m6J5J6r3N2K10
2648B5p6k45M3J30j3m1J03pj51j06L8R9J00o0o0K6K5m6m6P3P4JKr8r8J18J18j39j40P6P6n8
2646b57n9O2O2j1j0K5K6l4l4KKk5k5M7M7%jK4j20j29J10J20k4O8O8j09j09K5K5M7M6J21j19
2644a39k00M1J55J1j04M1J94M8k53j10Q2Q3p1P3M7r8k5J18m3j88L8J82n4n3K8K8k0j9PQM7
2642a46r7j06L8J44%j11L3L9M0M8M9j18j18m0J04K1j22j5K25J54q4j99M0O5p9p3P0Q6n9nn
2640b21p9p8R0Q9j10j11O4K07L3j11k2k1J8J7R9m5p6p6j3j2J80J80m0j85j15L0O0O0p6p7R2
2638b49R1j2j2j2j2l8l8L5L4J6J6Q9Q8o5o4PPo8o8N2N1J8J8L6j08o1Q2L8j07%jq2q2P8P8O
2636b39Pl9l9L3L3K9K9l5l4j15K9J49Nj24j23Q3Q3j0j1m6m7NMMMJ12J13j4j58l8J05O1q3j7
2634b84j6q9q9R6K39P1p3m7m7l0k9J27j6o2Q2M2j02l1J14o5k10J6J59rrJ26j9j48mJ07l7K1
2632b16K1L1j14o4Q0J15k8q0O3N7j82j51J85R6j45k7K13K5j20J33J32r2r2m1m1n0R4mmP7P7
2630e2j63j63J01J01k6k7M6M6k7k6j47j46J41J42K2K1kjl8l8m9m9K4K3K9K9ppO0O0o0o0P5
2628a68P5m5m6p2p3k8k8KJ45K6j19O7O7j5j4L4L5kjMNK2j21j05M0J12l3k5J20r1r1L3L4J9
2626b37J8O7j74o8J72Q0j60K0J64L7j08j71j70O6L07Rk31L5K74M3j97ppk2k2K0K0j6j6M7M8
2624a79k5k5poK9L0o8o7R2R2j2j56q3O0J%J0RM7M6M7M6o4o5J52J50j55j57J2J1n4n5J94N1
2622i9j23j23M5M6r6M8L9L9K7K6R9R7j84j85kJ42L4L4M4M3m8m8m8m9QQQQppN6N6lj49l7J08
2620a93M2j01j2j1Q0Q0Kj42q4O1M2M3l5l4L8L7n1n0m2m2j09L4J64K0m3J01K8j15o8P5j4j4
2618c13L9M0p1p2l8J06J14k9j13L0J03m1q0O5k5k5J32J32j31j32N0N0k2k2k9k9l9J06kjPQ
2616b32J3J4J03m1j83l9M8M8o8P7P6o7n5n5o4o4P9P8P9P9j15j15N3N3N6N6N6N6j41j41P6P5
2614b05q3q4J33J32n6n7n7n6N3N3k0j9j06j06K06K06p8p7p8p8j7j7N4N5k2k1k2k2O4O3O4O4
2612a34j26j25n3n3LLJ24J23n8n8l7J07J14j73j74J15J40nK3K3j42j42J21J22n8n9J10J10
2610a59j11j11RRJ2J3J2J2OPOOm3m3m3m3J58J59n7n8m4m4m4m3j0rj0rJ07J08j08j09R3R2K1
2608b68K1p6p5M4M5m3m4K9K9M1M1l1l2l3l4L8L8K0K1n2n2J19J18r7r8M5M5M5M5j09j09J1J1
2606c47KKKJK7K6r4r4J13J13j03j03L8L8L8L8m1m1L0L1j2j2O1O0l0k9l0l0K3K2K3K2J8J8J8
2604b02J8j12j12J04J03r8r9K1K2R9J00j16j17Q5Q5q3q4Q1Q0RRm0l9L2L3l3l4L9L8k6k6k6
2602b89k5J05J06o2o3m7m7m8m7J55J56o1o1j0j0rj0L6L7l6l5L4L5q5q5LLP4P5l8l8l8l7J21
2600b41J22m7m6q7q7j5j5O3O2rrL5L6L6L5n9n9n9n9O7O8O7O7n9n9n9n9J16J17j96j95O5O6
2598c97O5O6MMMMj1j0j1j0l8l8Q3Q2q4q4j6J29J42j45j37PR8m6n5Q9J35j52o3Q2L0L0L9L9
2596a65j5j5N8N7j53j53J12J11QQo4o4j6j6j6j6J04J04o5o4J1J0J1J0K4K4m5j89o2K26J14
2594a26j73k12P5K5K5O5K09L5k53m1J03LMPPo5o5N1N0k1k2N5N5o5o6KLKKl1l0M1M1n1n2J16
2592b97J16l7l8l8l8N1N0k1k1J7J7n5n5J23J22j45jK01q8j68J19J23j66j38NL5L6k8k8J22
2590b25J22r4r3L4L4q6q6N3N4o7o6M9M9M9M9MNMMl8l8L4L4q4q4L5L6o0o1O0O0k8k7M5M5J6
2588b62J6n6n6O0O0j2j3kkkkN9N9j3j2j26j26ooR9R9K7K7j18j18N0M9N8N7N7N8q8q9Q3o1j30
2585c82J58R5j94j22J66J57j31p9O5l3l4K4K4K4K4K3K3n0m9L2L3L3L2PQj13j13J04J04o5o4
2583b93J3J2J2J3m3m2P7P8m1m2L1L1p0p0N1N0q5q5L5L5N5N5j7j6o7o6N4N4rqrrJ10J10j06
2581b02j06O4O4j04j04PPJ27J26m0m1j13j13P1P0kjk2k2N1N0O3O2j06j05ppJ61J7j65P6J32
2579a12j1k4k5l3l3L0K9o6P8J67p4j39NM6r7O4O5j1j1j2j1POPPL9M0l2l2jjp3p3O4O4n6n7
2577b66j4j4J06J06r5r4P3p0j79O2K29j0j57j4J40mj10j11M8M9J0J1J0J1J2J2J2J2K2K1k6
2575b18j71q7J54R1n4L4L4K5K5rqj7j7L4j11l5K05M0k00LJ48l4j79J52J51j32j32J08J08r8
2573a90r9k7k6P1P1p3p4J8J7QRP7o7QK49K2k18nJ39j55j55R4R4p7p8J63J9j09J31N9j80O9
2571b15K14m2j85P1P1j78l4J57q3r0J51Q6j54q5N9MLQ5Q4j08j07L6L7L1L0m1m1l7l7L6L5L4
2569b13L4l8l8n6n6Q8Q8K0J9J9K0n0n0m9n0J7J7J6J7k8k8k9k8P5P6o9k13o7J73J82L7rj0j8
2567b01j9L3L2j12j11O3O2j8j8k6j69PK47N2r3MMK3K3m9m9J07J08l7l6J4J4n7n8NONNo7o7
2565c73P7P8M7M7k5k5PPOPl4l4j78O2J89M4r4N0P2p1p2P2R7m8j02j02Q7Q6n7n8J0J1J0J0N1
2563a46N1k1k0j08j08L7L6L3L2l9l9J9J9J9K0m5m5LJ47K6k15j30K05J45r5j02M3J73K9j21
2561a97j20Q0Q1o3o3P1P0kjo8o8P6P7k8k7k7k7J5J5J5J5n8n9Q6Q5n7n8O2O2l1l1l1l0M6M6
2559a44k5k6k4k4R6R6j00j00O8O8p6p6M4M4j00j00O7O8jkjjLMMLm5m6P4P4LMLLn7n6O3O3k7
2557a79k8k8k8J39J38p6p8PQo5o5j6j5j5j6J77J76j34j36Q1Q1q8q7M6M5n1R4N3j87l1K09J5
2555e4l22r9K36J57J4n3n3l4l3l3l4J06J07j4j4o4o3QQopJ13J14q8q8Q1Q0n8n7J4J4q7q8L3
2553b64L2J6J6J6J6m9m8K3K4K9K9L0K9r2r2k0k0K5K6R7R7lllkr1r2K9K9Q5Q4l5l6L7L7q4q3
2550b11N6N6j5j6o4o4QQm3m3J73J72j16j16N1N1q3q2J6j28q0K08J99q9p7p8k7J17K07q1k09
2549c00P8J58j29j21J68J6j29M3M3J2J2o0o0M8M8p2p2R4R5K3K3o3o3J0RooooooonM2M3l0l0
2546b11K9K9K9K9l4l5l5l4n0n0K3K2O6O7noO4O3j52j53N4N3o6o7J7J8J7J8N0N0N0N0j10j11
2544c21N8N7rj0j0j0J23J22r4r3j3j2j3j2l3l4Q7Q7m6m6m7m6N6N6N6N6j19j18M9N0M1M0p9
2542b27q0N3N3N4N3j17j16N2N1N7N7o3o3JKJKm5m4K7K7K3K3K3K3j9j9k0j9K1K1K1K1o4o3Q
2540b85Qj2j3N9O0m0l9m0m0M2M1M1M2j24j23J40J41j58j58K02K03j84j83Q0Q1n3n3O7O8MM
2538b22NMJ2J2j08j08R3R4k6k7kklkJ0J0J0J1J0J0J0J0o9o8o9o8J65J65m1m2j04M0L1L1J8
2536b10J7j02j03K2K2K2K2L6L5q4q5J10J09L2j13k5J19M6r7j04L9K2K2L7L7q4q3J07J06j58
2534b86j58J42J43J3J3l4j78o7P7O9p4lJ42Qj36m5m6R7R7P9j61j45R5J47Kp0o9Q0Q0L9j06
2532b55M8M7l1l2M9M9r5M9J13j28j50oJ8J8M5M6k7k6O0O1n1n0j04M1P9Q0j5j5P5o9k06o2J12
2530c32J12j24j23J40J41j48j47J16J17o5o6n0n0L7K76O9j70p8O7l0l0J35J34q2q2k4k5k5
2529c07k5L6L6k7k7l9J05K4K4q5q4O8O9L1k09j04J36J67p3j24K0J30J30j17j16nJ38M9M9R0
2527d0n3j82l9J05l9m0J05k6j70PJ51p2p3N6N6j2j3N9N9j29j30j05J34J23k1KLn9n9O1O1k2
2525c02k1k2k1P3P4r4r5Q6Q5l4l4mmq6N9M3M2k0k1POJ5j29L8L8K0K0J07l7k14p0J94N1k8k8
2523c06KLJ2J1j10L5J75o5j72O9J83n8j91m6P3P3k2k2j3j3k4J19J28j6j23K0Q4o1l8l8K5K5
2521b81n4n4J61J62nnnnj07j08O0O1M7M7p4p3K9K9m3m3l3l2L9L9noonn5n5J12J13o8o8MLK7
2518b57K6K6K6J7J7j03j03J22J22r5r4J1J1J1J1Q1Q2q7q7l7l8Q3Q2m0m1L2L1O3O2j0j0j26
2516b12j27M1M1P3P2m8m7P5P6m5m5mmp6p6J70J69m5m7q2q3L8L7o1o2N9N8r3r3J23J23r1r2
2514b78j9k0j4j4j4j5O7O7norrrrM6M7p4p3O0O0o0n9K7K7m4m5J27J28q8q9O1O0O0O0j62j61
2512c79N4N5J9J8J9J8n9o0O0O1l9l8l9l9J25J25r1r1l2l3J83J83q4q5j3j3n1n0K1K2M0M0M0
2510a13M1q2q1L9L8o5o6N4N4l7l7O2q2j83J05K25o2j61j6J34j0j8j7M5M6o6o5N4N5m8m7K4
2508b80K5p7p8R1R0n1n2O9O8n0m9n0n0J91J90j21j21j0j0j1j0J42J42l8l26o4K25J43j44j27
2506c43J7L8L8k5k5k5k5L8L7L7L8K6K7r3r3L8L7o1Q3J38j50j80l6R4R4L1L0q6q6R1R0j35Q
2504c33J85M1j31J3J9j26rK30J21k13j85N5k9l0J27J27j28j29p8O5N6N6K6K5K6K5k4k4k4k4
2503b90KJKJj6j7R5R4l1j76o4P9O4p9qJ37L6j08r0q9J20J20nj50lJ41k0k1QQq3O2J70K6k28
2500c12q5N6N6k5J19K8j17n7J83L5k06k5J19L3j10N2N1m1m2M9r6n8Q5Q6n9o6P8O9p5K2K3j07
2499c37j07P1P2%jl2l3M0L9J3J2Q5Q4p5p5r4N1J54J0j15j16OOPOJ1J1J0J1jjR6m9j23J18J18
2496a28j23p1P2%j44j00J40J49NmlJ2j32j77O3K31rj51qJ13l1r4J46P9j60j01J39Pj37J0J54
2494b53L4j10l7J07L6j09q2O2J34j0r9M4K7K7o0o0R9R8p2k16k0K19J00j39j34J07R6m8k5k4
2493c08j2j3P8o6j23K1J41mp8O6O6p8k1J23Lj41L0J74m3j86o4Q0j1j0j9k0j9j9P1P1jjj9j9
2491c51j9j9L5L4l7l8P5P5m5m5R1R1j25j26K7K6K6K6K4K4j29J5M5M5j8j8J2J3J3J2p7p8M3
2489c73M3%jR0n4p9O6O6p8l0J14M2j02n2R1KJK7K6K6K6n9n9j40LQ7Q7K3K4q8q7J20J19qj51
2486b78p1p1M7M8O6p9q3O0J23k0j3j3k3k2N7N7o3o3O7O7mnk5k6M6M7k9k9k8k9j5j5j6j5LL
2484c44KL%%j%L2L1L1L1j36j37Q0Q0L3L3J11j29j56Q4J35rl7l7m7m6J29J28l9l9JKp1p1P4
2482b79P4LKm8m7m8m7J35J35J4J5q6q7j16J24J33j06j36J04N8q6J0J0j19j18R8R8k4k4k4k4
2480d06K9K8K9K8k7k6J0RK9K8m3m4J8J7J7J7lmmmmnL2L1L2L2j36j36P8P9M2M2r4r5K6K5L4
2478c19L4L4L3j5j5j5j5K0K1n1n1N3N2j9j9P3P4r4r5R1R0l0k9L6L7j32j32J12J11k4k3P5j64
2476b96k10L0J22k2m3J01L5L5k9k8l4l5Q6Q5RQk8k8l6l6L6L6k8k7RRJ4J4J4J4q6q5J30J30
2474a34j93j94J19J19j1j0O1O2llp5p5N2N1o9o9O4O5qql0l1pJ37P1j69q0O5O0q3j02J38J84
2472a06L9q1q1n8n8J4J4%%L6L7l2l2MMK4K4j2j1j2j2j2j2k4k4R6R6j37j37J76J75j41j41K7
2470c57K7J11J11o5o6mj49m9J91Q9j51j0J34j09j10J16J16j49j48O7O8j8j8N4N4M3M2l0l0
2468b40p5p5llL3L4P0P0k9k9k9k9J8J7J8J7k4k5q5N9J78o3j82N8O9p4l3J12oj50J8J62j2j56
2466c89p4O9K8K7L7L6J1J1J0J1rr%%j61j8J59J6q8N6J28j6j89m4Q1Q2L0L1q1q0QJ53oj50j8
2464c48J26N3r0r7M7K9L0jjJ7j27o3Q1J54Rn1R3K1j22j59j5O3O3jjjkJ2J1J32J31r0r1j9j8
2462b25l3l2l2l3M7M7p3p3Q6Q6j73k8J58J3j45jJ01J02L8L9k9l0k9k9M7M7p2p3O2O2n8n8k
2460b93kkkK0K0K1K0k3k3j4j4n6Q7J60J6r1r1O8O8J4J4n8n8J3J3n8n9MNk0J24J42r8k18K2
2457c49J27j7PPm9m9P1P1k6k6k7k6k8k8M3M4L3L4l9l9P2P1jj45j89N0J64K0j5J29Rj35n2R1
2455a97KJQQo3o4J13J13n5n5lkklP7P7m3j87p4J65R3j47j13L0N4N5k0k0N3N2P7P5r1r1p9p9
2453c35opJ03J03o5o5N9N9O0N9j75j74N0N0p7O7J36j04j49R2R4n0RR%JM5M5k6k7J2J2J2J2
2451a71j14j14J02J02RRRRp2p2RRp7O8P6o8n7Q6J22k2j38PJ17k7q1q0P8P8J4J3k2k3K9K8p
2449a71ql4l5l4l5P8P7m3m3k9k9M3M3M1M0l2l2j7j7l4J09N4r0%%o0n9O0O1QQo4o4m6m5K7K6
2447c46M4M4QQm6m7m6m7Q5Q4J03m1o6P8j2j1RRq6N7K07l2j47lO1q2j01J39J08l6r9r9q9N6
2445c36J75L2k4k5LLKKp0p0J06J05K8j16m0J05K4j20j5j5n9o0N5N5k6k6J32j1j41LR9m6j5
2443b86J28J1k29pJ38O4q0J1J0K8K8r2r2P2P2L6L6j01j02O6O6L5L4q5q5M2M1OOj5j5K1K0j5
2441b33j6N7N6j43j43P3P3J2J1M8M8l5l6J%RRk7k7P1P0m9n0o9p0N0N0K1K0n2n2R8R8j17j18
2438c62J7J7j9j9K9K9ppm3m3P7P7r2r3J23J23m1m2N4q9j21J19O5p9m6R7J51q8j00M3P4p0p9
2436c45O5J29j6j18j18M0M1K1K0j6j5M8M8k4k5O4O4n7n6LKLK%j%jooO6O5L1L2m1m1q8q7J31
2434a86j3j65J22J14l1p0P5Lj42l0J14L2j11J9K0o2o1J33J34j31j30Q2Q3l8l8L0L0L0L0j24
2432b81j23J40J41j28j28M0M0l4l3L8L9J3J3J3J3R3R2j23j23L5L6M4M5j71k6J92r6j69J19
2430b89J91r7r1J97p1k14N5N4k7k6L7L8L8L7n7n7n7n6L0L1L1L1K5K5r6r5P0P0n0n0L2L3L2
2428b76L2l0l0M2M2M1M2l0l0l2l2l2l3R8R7k4k3j5j5j5j5M3M4k9k9N6N6j7j6RRJ0Ro7o8N3
2426a75N3r6r6K4K4K8K7J00J00m8m7m8m7NMNNl6l6L6L6j5j6j6j6POPPJ1J1J1J1m7m7K4K5J4
2424b05J3J4J4j8j7N4N4o0n9J2J2j14j13N4N4j8j8N4N4L7L8p4p4k2J22J84n5k13o8J47J47
2422f4q7q8j5j5j1j1j1j1L7L6l5l6J30J29l9l8l6l6l6l5m8m8P2P2MLLLL8L7l4l4l8l9L4L4
2420b13k0k1N2N2r0r0J26J26j08j08O0O0k1k0r3r3J6J5Q8Q7J8J8M1j02q3J57R4m9r1r1K0K0
2418b43K9K9K9K9r3r3P5P5K1K1n2n1RJ0RR%%%%N2N3k0k0n7n8J11J11j27j26J37J36m6m7m7
2416a35m7o5o4N5N6k4k4M8M8r4r5P4P4j38j38P8P8POOPN7N8o3o2oonoN7N8j5j5K7K6K7K6k3
2413a52k3m7R7L5k06j33J07J51Qj7j6m5m5K7K7M3M4M4M3j21j21M6M7p5p5R4R3q8q7J28J29
2412h8j69j68J52J53j37QJ32j2n3K0n3j24l7J07O7nr8k7J38O5j50j49J57J58m0m0L0J03Oj37
2410a91j38OP9OJ1Q3m3j16J0Q1j3j3l1j04m2J02J07l8p8O6Q9J6LLkkOOj15j14P5P4r4r3R1
2408c13R1p6j48n7Q7K09J38j03j02J3J3j9k0L0m2k7J17Kj43OJ50j8j62M1J86J4j31p3%K2K2
2406b93J%JJL5L5l8l7O1O2ooo0J2O8p7j27J13J18j21j18J23N3r1K8K8n3n3M1M1M0M1n9o0J57
2404a40J55j19j21R8m5p7K10J6k72k10K71J45j44k4k3m2m1J17J18j47j46P1P1j00M4J98q9
2402b26j67k3R1R1K7K8M8M7p2p3rj0j0r%j%%LLP5P4p9p9m3K45J17j68j42KJ6J6m7m7PPPPP
2400b87OPPK9K9L0K9k9k8M3M4%%j20j20J32J32j32j31P9Q0jkO7p8j77J11K78j0l53o4J06J06
2398b17m4m3Q0Q1q7q7P0P0P0P1r1r0L0K9m1m2P8P8mnmmr1r0K9L0O7O6j01j01Q1Q0l9m0L6L5
2395a40l7l6o6o5N5N4J9J8n3n4K5K5m7m7P9P9m1m1j0j1O2O2O1O2n8n9p6p6R3R2j0j0j0j0j9
2393a90k0j9j9rrrrN2N3o8o8Q0Q1l9m0O1O1j1j2j5j6j6j6n2n3J9K0J37J37j73j74J12J12n5
2391a67k00J2K52M2j99q9J51J45r6j98n5J61J61j16j17J47J48j56j55J2J2o7o8J01J01M5M5
2389a48M5M5j37j38L0L1l7l7Q3Q3K8K8Nj40o6J74O0j81j11J29O0q4mlj2j2R5R5k4k5m4m4J8
2387b38J9Oj38k7J17N0r5mmk4k3M9M9nnj4j4L2j11m8R6J14l1l6J08M0k00j28J12O8p5J89J87
2385A6k07k08J53J52j27j27N0N0j20K4J53QkJ43L4k06p2J68R9m4r3r3j20K4J21k2k3J22P2
2384g5p2j83l9P7P8N7q8p7O8J39nq7N7N7q6r6M8m2m2N0N0k1k2N9N9j09j09L1L0L1L1qrqqO2
2381b02O2j05j06j4j5N8N8rrJ5J60J9k20r1J48J2J1K7K6q0q0M0M0k7k7Q5Q4K1j22j20J20J28
2380a13j11j78O2J12l3O4O4m9m8P1P2j52j52J60J60j45j46J66J67j28j27J84J84j29j29rj0
2378a93m8m8K4K3m2m3P7P8J4J4J5J4k8k8k9k8r1r1J25J24m6m7K6K5o0o0J2J2K8K8K9K8ooO5
2376a33O6j78j79J33J34q0q0M1M0N1N1k0k1j5j5j5j4jjjjJ0RJ0Rp0p0R8R8l4l4l5l4L4L5J06
2374a06J06j72j71lmM0L9l3l2J8J9J8J8K9K8K9K8n8n9J4J3J23J22j41j41k3k3k3k3KKJ22J23
2372a19o0n9O1O0n9o0O0O0m4m5K7K8k4k4r7r6J80J80j41j41Nj39l4K54J61l19m3K46R0j98
2370b90J02J02j42j42J24j9j40J48N8q5J3J3MMQ1Q2q7q6n0m9P1P1n4n3J14J14l1l1M0M1k4
2368a01k4k4k4o9p0N1N1K6K7K6K6n5n4m6m6J6J60R0j97j13J74J03j85j40J48M9r5L0L0K0K1
2366a95jj%jjj%jj8j7j8j7j6j6N6N6k3k3k3k3mnnnN4N4j9j8o2o1J06J06j16j16N2N1J0J0J0
2364b41J0LKq7N7R4n0j10J31Q8j52q0J60j2k52P2K15r7k41J19K63l7j81J15J16r8k41m1J99
2362b76Q3o0j14J25J51r0j88m4J37J37p0p0P5P5LMm1m0L2L1k2k3k2k3P2P2r6r6N1N1k2k1P1
2360a48P2q7q8M5J89j9j62j52qK2K2L5L4n5Q8J11l3j92m8J07J06n2n3K7K7K7K7MMn9n9o7P8
2358b57J58J5j40MJ36j04j67P3J87n3j65k2J47J46l8l8j19K5O0O0n1n1llllj05j05O2O3Q5
2356b06Q5q3q3N4N3o7o6J43J43j20j21j4j3N8N8JJKJJJKJq3q2Q5Q5p9p9R0Q9m6m6N0r4j12
2354c91J28P4p0r4N0P1P1l1j76p0J70J07l7k2J22j4j4noONo7o7opppJ5J4Q6Q6m7m7l8l8K1
2351b35J64J06j31j39MO2q2K5K6J7J6J5J4J5J4rrq2q1R4R4p4p4J54J53j57j58O6O6n4n4K3
2349b11K2K3K3o1o1J07J07m2m2m1m2OOOOm6m5K7K7Q9Q8p9p9OOOOk1k2N1N0n9n9J09J09r6r7
2347b23K4K4k4k4M8M7J9J9n3n3j3j3j2j3O2O2j0j0k8k8M4M4j3j3j3j3ONNNM5M6k7k7q0q1Q7
2345a79Q7n2n3n2n3Q4Q4J2J2m2m2P8P8q7q7L3L3k7k7M5M5J2J2J2J2KJKJk1k1N1N0nnoon9n8
2343a36O2O1r4r4P4P4o4o4J04m0k20K0K31Q6j00M4L3k08p8J63K1j23P3P2o6o5J53Rp2P2K2
2341e0j22m0J03KJJ9K0j07L8J09l5LLpoM3M2j15j16OJ50R7j40j60Q1K33po2o3M2M1L4L4j26
2339e5J6P4o7o8P5J12l1j3j3r1r3P6P5k5k5O4p8jJ43k5j68l9J04J5J4onj58j5J45J43o2o1
2337d3RR%%qj53oK33P6j63j4j4j37j36P9P9M0M0M0M0K6K6r2r4M1M2l1l1O3O2n7n8N5N5L1j12
2334a03q9J51Q4j53j86N5P2P3LMo8o9P9Q0n0n0J67K1j12j12K7K7LJ46Q8j51j51Q8J22k3l7
2333f4l8j09L4P4P3rj0j0rjjr1N4L5j09jK38j5k54p1J68p1p2P3P2o7P7Q6n8j27J6M7M6k5k5
2330a44k6k5l1l0M1M1M6M6P6j64j65P5J74L0k5k6j06j07N6N5N6N5l5l4l5l4M5M5J5j28l0J14
2328a75M3j02j4J31J20k1q3q2K8K9j7j8j7j7k3k4k3k3J29J28q7q7K8K8m3m4P1P2j%m9m9n7
2326b49Q6R6R4o2o4l0l0l1l0k1k1k1k1O4O4P4p1j3j3k1k2J1J1J1J1J67J67j92j92M0L9l2l2
2324b33J00R9o9o8Q7Q7q0q1k3k4R6R7m5m4K7K7j03j03J13J13o2o1N9N9j07j07O1O1k6k6k6
2323b02k6J0J0J1J0OOONJ5J5n7n7P7P8r0r0L3L4L3L4ppO5O5j03j03O5O5L4L3j34j35M5M4M5
2320a67M4PPo5o5Q5Q6l4l5ppqpppqpL3L4l9l9j%j%M0M0n6Q8Q6j55j54Q6j0j55QK48J36j04
2318a10k5k6n5n6L4L5o7K21J78l00j80J09J66K1n1n1o0o0P4P5LLPPPPK8K8K8K7r7r8K2K2L2
2316a02L2q7q8j6j6J52J51j38j39J72J72j15j16k6k7j19J69J77j10q2O2l6l7R3R3j22j22j2
2314b37j3j2j2LLLKM8M7K7j18o8K20J47j39j30J5j3j2POPPJ6J6n6n7J12J12qrk1k1k2k1m7
2312b18m7m7m7N5N4N4N4L8L8q3q2K7K7K7K8rrrrJ4J3j54j55M4M3L5L4J39mj76J12J74j15j35
2310b89Qn7n7P1K16J8k22m9R6Q7n7m0l9k7k8R3R3m3m3K9K9N3N2J7J6n4n4n4n4LLL8L9lkp5
2308b86p5K5K4R7R7N5N4j13j14K4K5r6r5R6R6q1q0J15l0j28J12J61J7opNOo6o6M0M1M0M1l7
2306a09l6L6L6r3r3k1k1J05J05o4o3j6j7J03J04l7l7l7l7N0N0J4J4m1m0P9P8pnj27j27J9J9
2304b16N6N5n8n8O2O2r3r3P5P4j8j9N3N3l3l3LLoopom7m7j1j1P6P7MMQ2Q1j33j34O6O6o6P8
2301f5R3j45l2K06M1j99j1J33j30j31R5R4j22j22R5R4K0K0j6j6o9p0N0J94J5k24j53Q7Q0o3
2299b51L2L2O5O5j04j03J6J6N1N2J0J0k6k6qpO4O5m2m2p8p8M9M9M8M9llllo3o2J06J05n3n3
2297a24n4n3P7P8NOk4k3R6R5p6p5j13j12J2J1Q4Q3l6l7L6L5q4q4J79J79j25j26n4n3P2P2K2
2295a11K1R0j50j95M5R7m8K5J69M2j98r9M5POJ66p4j52Q9J00m3J8J61r5r6L6L7j74l0J48L
2293a60j77O4Q0j61l4K06J02m1j8j8k2k3O7p6o0Q4P4o9k8k8l8l7P5P5r2r3N0N1m0J05P1p3
2291a84J8J7m7m8P3P3n8n8J4J4n6n6k6J18L1j14l2J12j5j5J14J14o3o3o3o3j3j3j2j3J04J04
2289a06j12j11N4N5j7j8L6L5L5L5p3p4M7M6j02j02O6O6L7L7l5l5N7N7j6j5J1J1J0J1p1p2%
2287b53Jk3k2M9N0O7O8n3n2P9P8j37j37Q5Q4q3q3N1N1k1k1N4N4j7j8n2n2K1K0QRo4o4J05J05
2285a13j5j5l1l0l0l0M2M2M2M3q0p9M1M0k8k8k8k8O9P0llJ6J7J35J36k20k21M3M3o6o7J50
2283a86J50j12j11J52J52j38j38K9L0J9J9J9J9j35j36Q1Q1M4M5p5p6MLLML8L8J10J09j50j51
2281b59J13J13J4J4j06j06l9m0Q1Q0j08j09K04K02j78j79J33J33r0r1K9L0J7J7J7J7p4p5k
2280b42lO7O6nnk4k3M8M9n1n1O9P0j43j42J22J21j1j1j1j2L0K9r1r1J24J24r1r2MMMMQQQP
2277a33j7j8j8j7M8M7p2p2Q6Q5q3q2K8K8m4m4O5O6O6O5j68j68M8M8nmO7O7K8K8m4m4L9L8q2
2275a68q1L0K9L0L0M3M4p7p7J42J42j21j22J4J5J4J5j7j7q9q9J06J06L4L4j1j2j2j2o7o7N
2273b06NJ09J09n8n9N3N1j14j16O0O1j2j2L6L6L7L5JJJJo3o3o4o4J40J40k9k7p7p8nol7l8
2271b52J30J29l6l8M3M2j38NJ51q7j93J43K14j20n7J82q7l26k8K11N3N3L1j11m9R5m0j84p
2269b71J38j5j5LMj22K3J43jN9N9o9o9N9O0o1k04n0J90J24j16p4J66N7k77j66J70K36j00j13
2267b32J27J19j18q6J55K2j22m6R7PQL3L4j34j35J07J07K9j15j06L7K16k1k39JJ70p1j31J09
2266a78J74o5j20K3j0rR8m6j16J25J33j05j60J76J98m1r5M8N1r1q4O1l8l8R1R0j86j87R3K35
2264B7j29j30R6R5m2m1m2m1J40J38r0k35P8P8r9M5J04j36k8K11Nl30oK33J5j29J2J2QJ52n5
2262h4j99MJ47k3k3J52Rj68k4J00m5p1P2j2j2llL6L5l6l6J50J50j14j12J5J6j10L4P7o8n8
2260b04Q5jkQPL2L2mlk5k5M7M7j60j61J09K53l3j76%J44n5n5j0j0J49J47k6j69j02M2K5K4
2258g0jjjjk8k8k8k8J08J06j3j55o2J78M2j01ppq9q8Q6Q5k5k6L2J75N5q8q5q6K5K5JJl5l4
2256a68LMLMq6q7Q2Q2QQPQm2m3ooL0L0J42J40r7k40J7J7mJ40J06k28k14K18K30j05q4J54l9
2254a6j83J14J13j10j11J4J4nJ40N3q9%%j2j1J14k8j09L5J7J7j5j5M8M7O6p7j49oR8R7n2n2
2252e3o6P8R3n1j07J31J33j08p3P0qj51L0J73Oj38l9J04r5r6N2J95K9j15j6j5k5k4M3M3o9
2250f9o8l8J06%j43k4K17R5j42j50nN1N2J32j05j52Q8M5r9P0O9j33j32J79J79j01j01J08l5
2248a06l3J12P4o7n9Q5l0l2r2N2J02m0k66k6K80J35j53j0N6j84j16K21J59p8o9P4k1k1O9O9
2246H5r8r8P2P1P3P2r8r7O9P0r6r6P1P2k0j9N2N3o8o7MNp9p9J83J85r8r7K2K3o0n9N9O0L0
2244A02L0L0L0m5m5m5m5K9K8K9K8j6j7q9q7Q4Q5l4l5KJKKL9L9l3l3m8n0K2K3p3p2M8M8RRQ
2242d0Rk9k8M3M3j2j2q4q4J11J10j04j05R5R5j20j20R2R3k8k7N2N0j9k0L5L4L5L5K6K5r5r3
2240c7R2R3p5p5O8O8llk6k6k6k6p8p8J36J38n5n4J7J8qqqql4l2l4l4O4O3O4O4p8p9ooM8M9
2237H5M9M9l6l5l5l5o6o8J48J49q0p9pqj2j2j1j2n0n0P1O9m4m5P4P4l9l9L3L3q8r0j7j8J3
2235a29J3J2J3J4J3J3J4nmnnL2L0L1L2mllll7l6Q2Q3j66j68R7R5k7k8R1R2j64j65J48J46N
2233A04NONL7L6q3q3Q0Q0j37j35K07K07k00k00%%%%L6L5L6L6r1r2K7K8L8L7l3l3N2N3j9j9
2231B0K9L0m3m2Q1Q1q6q5K9L1q9q9J45J45k3k2o8o6R9J00j02j02l1l1QQP9Q1q1q1L9L8m8n0
2229i6P0P0m5m6m6m6M6M6k7k6R5R3p4p2p4p3K37K38k12k11J00R9n6n8O2O2j5j5j5j3N0N1k1
2227G8k1j9j8j9j8M6M7M7M7j47j47J17J16k4k4k4k5O4O4j05j03n5n5J13J12o6o8N3N2p1p2
2225a25M8M8K0K0K0K0m2m0o9P6J71j16k35N2K10O7r9r7K0K0n3n2LLMLR8R6p0o9M6M6M7M6o5
2223E2o5OOM3M4k9k8N3N4j9j8r7r6K4K3O5O5ppn3n3J9J8OPPOo6o6NNO5O5n4n4J20J21r6r4
2220b3j7j7j7j7l9m0L2L3O5O4j03j03J01J00j9j8m0m0Q1P9r3r4P5P3L8L8l4l3J4J4n8n7J07
2218E2J07j08j08m4m4J24J23m6m7m6m7O6O4opj9j9r2r2P6P6MMo8o8J48J46j14j14N3N2K1K0
2216D7K0K0m2m3m2m3OOP7P7k4k4k5k3M5M5p4p4N9N8N9N9q9q7q9q9J02J01L0L0j8j8j8j8k3
2214b2k4R5R5n9o0n8o0J30J31l7l8O0O0j56j55R6R5k4k4n6n7O3O2n5n3J13l0j80O0J78o0n8
2212b8Q4j2j1L9L8l4l3jj%jK7K6r3r4R9J00k0k0n0n0K2K1m4m4L6L7qJ35Q5j55p6J62K2j22
2210C6L4L3m8m8P5P5r3r2O4O5n5n4o4o4J51J52j31j30Q6Q4j21j22J42J42k3k3r4r5J21J21
2208A24r5r4J%J20J21o3o2N7N8j61j59J52J50j10j10N7N6k3k2k2k3M4M4k7k6R7R9j17j17M2
2206iM1M1M2j0j1j0j1j8j8j8j8L4L4q4q6J66J68m8m9j18j18N0N0J8K0J9K0k5k6k5k5J8J7J9
2204C0J8L2L2j36j36J42J40K2K1r4r2K5J70l6k76K9K68Ok33Q4Q4l9l9L3L3p0o9N1M9j7j7j7
2202bj7N8N9j3j3o2o2N7N7m3m2P5P7j04j02P4P2j02L9J81n9j77O0J12l1K8K9n3n2J8J8J9J8
2200A17m4m3K8K8j16j17J94J95j53j51J10l3j37J01K12k7l7l7q8q7M8M7k3k4jjJ17J19j21
2199G6j20J03J03j87m5J79L6k01n8N9N7Q9n5o8P3J50q9j06L5K9j14M7M6m5m6P3P4J3J3j7j60
2197e6nJ39k3k3k5k4m9R4Q9j51j16J25J21k1r3r3O9O8n9n9J41kj77l5J77L5MNp3p4M7M5K5
2195B6K6J03j37o3J75N0j89m3J00p5p7J58J4j14K9R2n2k4k5q0O3K09l0k16J18J90j45j21J17
2193G9J06j34p6O7QPl2l1L9L9nnL1L0j06j06J4J56J53q8j92m9J04J04ppp0o9M9N1o0o0O0N9
2191E9n8n8J3J4kjkkJ1J1L7L8oj49m5J94J07l7o1o1K0K0K0K1k6k6k5k5K7K7JJK7J71k4k64
2189e3PK45Rj34L7L8o7P7K01l9k12K7J76o5j15K9K8K9q3q2J00J01o8o7O8O8n1n2l3l3l3l3
2187B0LMl2l2l7l6Q4Q3k2k1R9R9j78j76Q7Q5L9L8q2q1J5J5k1k1O7O6n3n3Q9R0l0l0p6p5R1
2185A8R2m7m6m5m6LMMLL2L2L2L2q0q2Q7Q5j66j66J93J92o6o5N3N4j61j62J50J49j9j8N4N3
2183A53k1k2R9R8r6r5J20J20POOOL1L0L0L0j21j21kjM4M5n2R3J04j35j36J04J06m0r6M8n4
2181B88n4m5m5n9n9O1O0RQo4o4L0L0q2q0m6R9R5j44j44R6J93N1JJqqj25j27Q9Q8m2m2m3m3
2178a25J06J05o2o2Q0Q0QQn4n4O6O6r9r8K1K0o8p0R8R7q2q3Q5Q3%jQRmJ41K9j15n9Q4Q5o0
2176A83J1J55L5j09O2K06mmN0N0k2k2m6m6K6K6j23j22J02J03p6O8J32j09j03M2n5n5N2N2j16
2174C43j16rqqqono9o8l4J10J10l4k5k4l3l3Q0Q1j26j26J6J61N0r5o4Q0J33j06r2N3M6r8o5
2172A1Q0O1O1p2p2j%l6l6J31j3k03L6K02O0o3J76O9k68p4J66J8j25L6L7J8J9R4m9n0R4K0J9
2170C46Mj40l4K05R2j49K0K60j7j60J15K60j42j42K4K5K4K5jjp3p3lmmmn4n3J14J14n0n1n1
2168D22n0O3O3rqr5r4k2k2N7N7o3o2n0m9K3K2J1J1KJNj39q8J51J05j35j29J10J71K7r3r4o
2166I3pppK6K6K7K6L7L8q2q2J8J8n3n4P9P9m1m1K2K2K1K2KKKJp0p0R7R8n2n1K0K1N3N4j9j9
2164B49M8M8p2p2M5M4M5M5k2k2k1k2J00J00j17j16%%%%P6P7r2r1J9J8n3n3J24J23r2r2M2M2
2162C08l0l0PQkjk9j73n8J80N6N7M1j02k04n8J56J2n6Q7J42r8j02M3L7j07n3R0Q2o2K6K5Q
2160B00PR6m8j35RJ06j35j34J04J35rkJ41j03k45l7K02O3q2K4K3q7N8J98m1k46nJ50Pq0O5
2158A99k6k5L7L8l4l5J8J7J8J8L8L9p2p3o1Q4Q3o1K5K5r6r5M8J93K4j20MLook0k0k1k0M3M2
2156B05J9j25j05J33J44jNNlmmmq4N9nnLMj25j24J29J31P7o6j44j44N2J96j0j55m8R6OOJ3
2153A27J3Q6Q5k6k6j7j7j37PJ37qj59j5J5J5P4P4m6m5O9P0klj6j7j7j6o0o0J08J07j01j02
2151I7J14J15j19j18R8R8l8l7N3r1j09L4J07l7o3Q1J35j05j05L9O4O3m9m8m8m8j4j4J6J60
2150B31K0j25nJ39K4j20l1l0L4L4l8l8O9P0n0n0j4j4j03M0J93M9l8l7N0r3j02M2J16k7rj0
2148A77j3j3j4j3Q7Q8Rj35j94n1J70J72r6r6K4K4K6K5l8l8q4N9j2j3L0J73K6k14j06J32J36
2146B28rp8p8L3L2k7k7R2R3j32j31J30J32MNR4n0j45kP7o8j6K24J3k26j25J15M6r7j0rR3R2
2144B73kj47r0J51O3q1n7n6P5P6Q5o0m9m8J4J4J1J1KLoj49LK44Q2o2l8l8m4m4N2r2r7J40P9
2142B18o6klN2N1jj46l4J10O6p8K1K1j50oJ71K7j54j1K0K0M5M5j23j22P9P9P1P0oj50RJ52
2140B75n2j97J3J3k5k5Q6Q6O5p9j98n5J35J36O3O4J5j30j30J5l1l1J95J94j82j82L4L3j1j2
2138H2O0O0M7M8J7j27o9P4L8j05m5J00J0J0qqj33J0J20k3q7N8J01J01r7r7n6Q8O0q3o4P9K6
2136A87K5N1N2p8p8J26j8j87m2O6O6j5J29jj46j36QJ82J82k6j69q7J52K7j18n4Q9P2P1j52
2134A78j52O4O3n5n6J13J12l5l6J%P6P6kj46o6P7P8o7r5M9J69K5k58j13J96N4j90m6J28J28
2132B70l8l9p5p5R7R7J5J6J04l9j60j6Q0Q0p9p9m9n0J09J09K3j22kJ42k5k6N5N6p3p3M7M7
2130C27k7k8QQkkp3p4P2P2m9m8K6K6R8R9j0rm5m5K8K8pqq5q5Q3Q3J2J2J2J1p9q0M0M0L9L9
2128D07l3l4p5p5M4M5j1j2N2N1K2j22j75J12J57J3n5n6PPM3M4n4n3J8J8N1N0p0p0K4K5m8m7
2126B00ooooP6P7MNm2m2K9L0J2J2k4k5L5L5jjK5K5m7m7M0L9nok5j70j96R0L28M1m4m4k2k2
2123C16n8n8L6L6J5j29l4K54K03k77j97R1l0k9J49J49q2q2J34j07j76J61J30j10M6M7p6p6
2122B46J82L8j68k3Q7n6OOp5p6O8O7N9N8k9j73P5K20j3k52p0P4O5O5KKm6m6P5P4j33j32KJ47
2120C26j9j9O3O2p1p1JJK8K8r3r2J14J14L3L2L8j07j16K8J33j2POo7o7N3N3L2L2p9p9q8N6
2118B60M7M7N7N6j6j5p6p6M5M4j3j3J50Nj90m5J70K6j52rJ51Pj42j42J52J52L0j15j23K1P8
2116C71o6K3K4j9j9N3N4k8k8k8k8N1N2j17j16R5R5j24K0K47m0k66K2K53l5k00n6N7N7R3n1
2114C46j21J66J67j22j31J2j5j5P3P2%Jl2l2l1l2L0L0L9L9n8Q6J76j12j36Rj9j9k0j9N2N2
2112D36j5j5j5j5L8L9j60j59N5L43Q8k00qJ36q9k33NJ50J40lr1r1K0K0k9l0M3M2O4O4n7n6
2110D17K1K2n1n0N0N0k2k2O8O8n2n2ppO5O5q5q5L5L5K2K3n0n0QQJ75J76k55k56J53J54qpq0
2108D76q0K0K0K0K0j6j6j6j7%%J67J68j73j73R1R2j16j15J49J48q5q5j4j3l0l0M1M2l0l0M2
2106D57M2m0l9J23k1j2J31K4k16o4J77L5j08OOr9M6J43r8p9O5K6j19nJ39Q3j58j67k3J78J79
2104F12p7p7J06J06j10j10O4O4K5j19K8K7j2j56j4J29J20k3o7o6p5p5R4R4k5k6J7J7J7J7J5
2102E20J5N1N1q7q6K5K5J6j28pJ37j8j7O4O4LMk6j70PJ52K2j21J07J06j66j67ONJ16J17J1
2100F31j33K1K0j0rJ52Qq6N8M9r5l4l4K1K0N0r5k2J22j3j3L2L2p5p5k0k1p4K13J51j38o4Q0
2098F49jj45m1J02M9M8j30j31Q5Q5j8j8j8j9O8O7n3n3Q9Q9j27j28k6k6J0J0J10J09n9n9N2
2096E70N3j9j9K6K6r4r4M7M7k5k5O2O1j0j1k1k2N0N0m3m4ppj0j0j0rN1N1k2k1OOo6o6M3M2
2094E36M3M3n5n5O5O6n7n6J6J6n7n6J12J12j10j10J15J16j13L1J94r5j57j3m0m0J79J78l8
2092G70l7n2n1q8q7j5j5N7N8K5K6Q6k03j39J48J49j39j48J41M1j02L1L1K2K3n8n8J4J4L5L5
2090E14L5L5p4p4M7M6K8K8K9K8p5p6M5M5qqJ3J58J22j65k38N1N8q6J3J3J04J05j6j5l2l2j04
2088E14j04J20J21m8m8N4N5j14j14R7R7K5K5r5r5J22J21j42j42P5P4m7m7P3P3RRJ0Rq3q2Q9
2086F11n5j57J32K12p5k48M0K08q0j36J51N3r1K4K4n6n7P2P2J%r9r9O9P0p3p3J44J43r5r5
2084E37r5r5J41J42p5p5R5R5j21j22MLk4J20J90r9j38PJ10l4j06L8L4j11J0J54O7p6J3J3l3
2082E69l3N4N4j03J37J41j96j47J90J24j17j14L0mlJ50Oq2q1N3N4N3N3j40j40P5P6J3J3j7
2081F68j61m3J02J1J2m3m3j3J32R0n3n3R0N1r4q5N9L2L2j20K3J76L3j41j42M0M1L1L1L3j10
2079E86M2M2m9m9P1P1o1o1N9N9l8l8m8m7J28j6k05L6K55J6k00L9J64p6p9O5n5n5K11O8k63
2077E72j18K95N5k41r6P2P1J7J7J7J8N4N5j14j13KKP3P4j9j9N3N3q8q7L2L3J0J0o2o2O0O0
2075F86N9O0k9k9j9k0o6P8J47r3j29J11J15l0m8m8j41R9K49q7k13J23J10k26j06K30J07k30
2073F60k8J16o8o8J2J3M6M5k6k6P3P2m7m7M6M5k6k6n4n4J57J2j50nJ14k9j17K7RRO6O6L6j08
2071G45q5N9J21k2k7k7l6l6Q6Q6q2q2N2N3j9j9J8J9J8J9J2J2R4n1j06j05NNO2O3j0j0k1k1
2069G70k1k1M7M6k5k6J5J5L2j11l2J12J04m1K7K6k1j65k2k1M2M2RJ0J0J0o2o2RJ0L3L2L2L3
2067H36N2N1j55j55J36K81p1k15L3J77Rj35m4J00R2n3n0n0NML8j07j16K9R1n2J00J00K7j18
2065H40k8k8l4J10J73o6j52qJ46Jr8r8O2O1k0j9k0k0N1N1o9o9P9P9n0n0J62J8k07o4J19k5
2063H27k6J19Rj35Q1K25m2j86L3L3j20K4J43%q8q8J4J3M1j03r4J46J36qJ5J6PPR7m7j02M1
2061I88m9m8J37J38j27j26O0O0j50oJ36rJ8J8j80l6J96N1j95M5J74o5k12P6J00m4j6j5k5k4
2059H70Q7Q7p2p3QJ51Q3k06m5K43P4k13k49L8J56J2q0p9Q0P9p3p4J43J43j06j06J10J11j06
2058I93j06O3O2M6M5j70j70J45J44K5K5o1o2N9N8j03j04O5O4m4m4P7P6l2l2M0M0o2o2N8N8
2056A091M3M3j26j25Q4Q4q4q3L4L5L4L5q1q1J83J83j24j25mmN5N5o5o4J7J8J8J7o2o3N8N8
2054A054l7l7J31J31p1p1N0M9o6o7OOMLnoL2j12j39J49J79j09k20O8J96N2j8j7l4l3l3l3K2
2052A024K3n0n0Q8Q7q0q1N8N8j5j4o7o7N3N4J7J7J7J8mllmJ9J9K0J9l9l8L4L4p0p0R8R9%%
2049A201p2p2R1R2p7p6J6J6J7J6OONOK5K5K5K5r1r0r1r0J22J21KKK3K3J4J4m2j86l2K07J54
2047A335Ro3o2j9j9j69P1K29j1k22J9J90M7k0J25l2j76r4M9R3R2o6o6j6j5N7N6J4J5j06j06
2045A139P0P0O0O1r0k35QK49R0j49q0O4ppKKN1N2o9o8OPPOOOl0l0K2K1R4R4L3L2Lj41j44j
2043A204L0K9j6j6J1J0O1q3k1J24M7r7k4J19L2j13J4J4l3l4L9L9j8j7j7j7O3O4N5N5N4r0k19
2041A249p5J65K2r8M6J29j4n1R3L4j10m9J90M0j99j9J24K5j19J0J54k8k7n4n5M8M8k4k5J0
2039A440Rj16K7P2p2pJ38Q3j57r4N0m2m1J35qk03L6J90M6j9k0o4o5O4O4r8M6R7m6m6R7J3j30
2037A379L1L1k7k7O8p5r7J42Q9n6q2O2M3M4r5r5P3K17N6j84j20K3m2m2L9L8L7L7l6l5O9P0
2035A535L3L4j01j00J15J15r5r6K5K5L3L4l9l8P9Q0j37j37N1N0p0p0N2N1Q8Q8p8p9M2M2j10
2033A422j11J05J05POo6o6m1m2J26J27K9L0m3m2m8m7q4q4R7R8k3k3N6N7j11j12P6P7MMLML
2031A493MO2O2n8n8mlp5p6J74J74r0r1n0n0P1P0MMk0j64l8K02J30j09n9Q5q3q3N9N8o1o1J37
2029A556J36j75j75R1R1J9J9j8j7j8j8K2K2N9N8j51j51K09K09j35j35Q1Q1r4r5P4P4l4l5l4
2027A516l4N1N1k1k2L9L9MLr6r5J21J21m6m7P4P3j15j16NMP9P8m2m1J10J10n8n9JJJJL3L4
2025A757l9l9j5j5K1K0l1l2MNM5M6p5p5P0O9lkL7L7JJK2K1n1n0J2J3J2J3p9p9Q9Q9n0m9P0
2023A770P1n2n3K0J9L0L1r0r0R3R3k7k7l9l9Q0Q1q4q5j2j2J49J48o7o7K7K6rj0m8m8O3O3L2
2021A937j12r1J97K28o1m9m8j7j6K0J9noO7O6m3m3p9p9R7R7k3k3M0L9j28j29J43J43p2p3k
2019A994jl8l7J8J9J8J9l8l8L4L5l3l2L9M0nnm1m1k2k2R7R8n3n4O7O7p7p6nnj1j1J10J09j35
2017A984j34L4L3R4R3p4p4Q5Q5l4l5L1L0O7O6R6R6k4k4j2j1J5j28n6K31P0p5L9L9m2m2N1N1
2015B525J6J5k3k3p7p7j17J71L3k55j21L60K04k76l05J75J25k0MMp7p7P0P0jkq9q9L1L1n1
2013B154n2K1K0J8J7R0Q9kkk7j70m2J99P9j62p3P1M7M7pom2m3J08J09L6L7j37j37P9P9J8J7
2011B433J8J8J27J27PPr1r1j9J25K20j9j72k8N5N4rqO0O1o0n9J3J3Q6Q5p0o9LLn1n0m1m1p6
2009B561O9K03l7j86m2P3p2r6M8L0L0qrO4O4m2m3ool4l4L8L7O7O8n3n3rqqqL6L7J08J08j06
2006B781j06p0p0Q3Q2M6M7RJ0k6k6K5K5m8m7qqJ60J60q9r0L1L1m1m1P8P9Q2Q1m4j88n4R0O4
2004C008O3M4j00j00M3P8P8q1q2mnL1L2k1k1J5J5k8k7QRN0N1k2k2JJL7L7k5k5j07L8M9M9j4
2002C053j4M4M4j9j8o0Q5J57J3l8l8l8l8K4J67l9j83p1P3J04J03q5q6J30J31o6o6J5J6q1O3
2000C282J44Jj65k1RRN1N1k1k1P3P3r5r4M6M6l5l5J38oj34RP3p0j25J16Q4o1l6l6M7M7O5p9
1998C330l2J12J39nj8j8n1R3P9j61j01K35J36j04M3J87j55j55K2K2L3L4L4L4L6L5L6L5L3L2
1996C940m0l9q1q1Q8Q7RJ0j2j56m0K48J38j51p8K11Q2k07k7J16J8J7N5N5j7j7RRo4o3K7K7
1994D073l6l7j9J26J43j45j36Qj0j0K1J66R7j92p0K18N6q8j1J32M3M2r1r1K9K9m7m7P3P3o0
1993D239n9J57J57K2K2m9n0L7L7l4l5J16J17mmK2K2J42J42l2l2l2l2K2K2K2K2lmO9O8kkkj
1990E080O1O1O2O1o6o6L3j11q7K02J38j50j45J43L5L4J15J16j10j10K02N8j64j64k6J18J57
1989E477J57p1p1J0J0j12L3J14l0n8Q5Q5n8p5O9J00R9m9n0n8Q6L3L4l0l0P0O9lkN7N8j4j4
1987E921J20J21JJn7n6P0K14N3r1j0J34L5L4L5L4N9q6r4M9J83L9l3J10Kj43J09L49o6l05J65
1985F897J65p4P1K06j31k12K21K26j10o1Q2k9k9J70K5o2Q2N7j83j6K25J86M2p0o9RJ53M1j02
1983G710M8J92K1K2J29j5j83l9J57J57q8q9M3J87R5j46n6K80K08j27m0K01J26j8P4P5n4n5
1981H815R9R9R9R8l5l5Q5Q5j1j1J8J63J19k6k5J19J50OP2K16O6j74j2K29J95m5r6M8J26J27
1980A0564O3O4R6R6R7R6N8N8N7N8O6O5O5O5N9N9Q9K33J52QR8R8J16J16J88J89K7K8K05K05
1978A3438k6J18K00N5J43K88J80o0P8L18K49J05J7J7K23K24K28K27O0O0K13K12R3R3L77L77
1976A7507J7J7K52K53J72J71K92J47J39K82K20P5J57L00K98K99L07L07J91J90J81L25L34L33
1975B2766K52L96M05K62K70M14L96L96L47L48L51N91O09L68L06N93O75N30N78P23O32O33O38
1973C3479O38O36R23R25P81Q86J174J092J091J248J248J313J602J706J563J703J991K006K006
1972E8011K378K666K552K697L065L209L342L821M167M455M923N403N825O305P014P878Q640
1971A36351R696J0789J2229J3864J5689J7478J9686K2204K4604K6729K8938L0706L2147L3311
1970D34421L4368L5207L6072L6972L8028L8989M0045M0541M0396L9943L9271L8356L7107L5818
1969I65534L4376L3033L1400K9665K7457K5249K2848J9982J6622J2900Q580L439j842o655
1969A222588j0976j4987j8539k1541k4709k8550l3256l8141m2845m7117n0478n2638n3310
1968G85501n2716n0892m8467m5875m2962m0179l7429l4645l1383k7830k4146k0208j6414j3054
1967B99301r801o632m060k044l16J317K706M338N874P315Q908J0733J2833J5041J7439K0223
1966C83175K3489K7041L1215L5728M0493M5199M9978N4683N8620O1789O4274O6290O7587O8643
1965A078204P0131P1956P3787P5610P6926P6925P6031P4399P1978O9194O6301O3516O0570
1964B005528N7593N4352N0799M6519M2006L7541L2260K6081J8687J0189O83q825j7754k5569
1963B330090l2194l8541m4783n1216n8418o6897p6403q5574r3352r9446j02999j03791j02159
1963A374317r9047r4725r0116q5603q0922p6408p1692o6218n9977n3159m6461l9644l3204
1962D77141k7347k2353j8417j5419j2827j0702r070p731o099m479l230j927m87R41K382M306
1961C44682O129Q207J0607J3199J5792J8481K1074K3603K6004K7996K9437L0519L1767L2836
1960F40333L3892L5297L6736L7655L8328L8919L8919L8241L7376L6348L5099L4031L2974L1432
1959A145580K9415K7495K5478K2997K0404J7607J3863R428M532p74n863j0364j4301j8131
1958A267366k1491k4744k8681l3326l8223m3082m7979n2054n4839n6152n6153n4947n3122
1957G02573n0944m8159m5554m3346m0824l7848l4547l1186k7690k4137k0788j7620j4898j2882
1957B52150j1238r797q843p979p211o538o360n879n315n027m880m592m346m058l837l838l669
1956A48743l381l024l024l000k712k448k448k261k262k020k020k002k002j921j632j465j465
1955A09656j770j481j409j409j609j320j314j315j258j259j241j240j248r59j050j049j122
1954H7603j121j001j002r35r36r35r35r18r17r18r17q16q16r36r36q03q03p30p31p87p88p15
1952F8207p15q58q58n94n94p03p03p03p03n92n92o64o64n55n55n55n55n51n52n34n34p10m22
1951E3741m64m64m66m66m02m03m94o37n33k93l09m54m47l03l52m95m78m78m02m03m03m02k21
1949D3972k20m85m84l00l00n01l57l04l05l68l68m11m11k44k43l59l59l58l59j91j91m07m07
1948C6040k86k87l76k33j32k76l06l06l48l48j80j79l08l07k99k98m01k56q9k32l51l51k88
1947B9603k88j52j52k78m22k65j20k11k10j94j94l48k03j44j45k55k56j73j73k45k45j13j13
1945B4704k33k33j42j42k15k14j21j21j22j21j54j55j45j46k31q6p8k22l08j64r2k36j44%
1944B0879j30k73j67j67j05j04j23j24j24j23k05k04m5m6j44k88j21K4j10j10j01j01k26k26
1942A7536j05j06l6l5o6k10k46j02p2p1l1l1j50j51p2p3j84j83q8N7pj50j42Ko9k14j21K3
1941A4903n8k02j07j06m3J01L6k05k82m3R3j47j48R3K2k19j49oj05j06r7r7m7m6j10j10j54
1939A2661j1q2q3j29J5m7j92j16K9m3j88j05L9j23j23K9L0j86j86O4O5j52j51j5j5j5j5j75
1937A0780j74pop5p6p5p6L6L5j33j33m6m6m6m5N4N3o6o6k5k6j46j45R5R6p3p2K2K1r8r8l6
1935I403l6l6l7J5J5n7n7n6n5n6n5L9L9j29j29o5o5PPl9m0j11j11k6k6k6k6o9p0N1N0o3o3
1933H123j84j83L8L9q1q2ONo6o7j41j42J23J23r5r4k2k2j49j48K0K0O7O8n2n2K3K2r7r7O2
1931F965O1j06j06J29J30j35j35lklkj10j09J07J07n3n3j26j25J09J09k04k03J44J43p2p2
1930F385n2n1K0K1j7j6q9q8J6J7J6J7p2p3p2p2j07j07O1O2k3k3k3k3pqq0q0m9m8m9m9N8N7
1928E452j4j4j23j22M5M6k8k8j8j9l7J07Qk32j75O5J79o1j01M4L7j07j3J30J0j33o4Q1rj0
1926D896n7n8p5O9O5p9J1J2m8m7J75o5k88m8J95N2n1n1N2N1Pj37j34J06J25j14m5R8j52j52
1924D313J22J21n6n6m6m7k2J22K4k17j30J11N0r4J0J53R3j47k36NP1P0K4K3pj50q8N7k5k5
1922D023n5Q8Q9n6j05j05J02J02o1o1n3n2n3R2J0J1O5O5j99j99J53J54K8j17j35RJ35j0k01
1920C664L9K73o3k72O5K14k5j56j2O0O0j3j4j04M0O1q2PPp7p8R1R0j3j3j24j24K0J63Mj39
1918C549j3J32O0q4q8N7N6q7p4P0P0p4q8N5l5l5M3M3j67k3J22k3j43JO3q1j5J29J01j38j45
1917C238R5J78o2j76O4J27j8j23K1m1m2Q7Q8n8n7K3K4o2Q2Q2o2j2j2r3r3N7N7r9J41J39j98
1915C295j32K04J68j68j62J74O2j79r4J46J03m0o5o4RRRRL3L4N1r3p5O9J29j11j52Q9J0J1
1913C279K2K3o5o4J42r7j85N6K42Kj05L8pj50k2J22OOQ7Q6j15j16J3J3p5O8J38j03j35J04
1911C208J17k8o6P8j2j2k9k8k9k8M6M7M7M7n2n3P7P7j47kJ65K1r0q9K1K1K6K6M3j00o0Q4J48
1909C474Ln6n6o5o6J56J55o6k11l6J07K7j18k9k9j19K5J17J18r0q9K2K1K2K1n3n3O7O7p0p0
1907C126l9J04J25j8j78l4L1L1n0R4J33j0q9q8L8L7l4l5K3K3K2K3N8N9k2k3N1r3j02M2Q8n5
1905C238j28J6R4m9q0q0M6M6O4q0j44%P8P9o1o2N9N9K3K4K4K3j1j1j1j1N3N3N3N2j03j03J13
1903C263J12l9l9Q0Q1k3k3k3k3O0O1o0n9J43J43p3p3K2K2n0n0RRRQo7o7J49J48o7o7NNRRR
1901C553J0K7K7K8K7j19j19R7R7onnnj14j15J98J97j01j01k9k9R3R4K1K1q9r0L0L1M9M9j19
1899C603j19J06J07L4L4n2n3K0K0OPOOq7q7J29J29p1p0R7R7j12j13J51J51j50j50O5O6M4M3
1897C857M4M4o9o9N1N1j04j04J5J6J06J06j4j4N1N1o9o9Q9Q8l1l2j0j1j1j1R3R3k8k7o0o0
1895C962J55J56p2p3%%K4K4m8m8k1k1N2N1j7j7N5N6JJJJOONONOONJ7J7J7J6n3n4J8J9OOPO
1893D289l0k9M2M2j3j4j3j4L6L6l6l6j5j5N6N7m8m8P2P2n5n5O5O5j8j7N4N5J2J2J2J2k2k3
1890D488j43j42K32K32l3l2q0q0J35J36m4m3J24J25j58j58J55J54k8k7M4M5p1p1R7R7k4k3
1889D907k4k3NNNNL3L3L3L4JKpqJ16k9k44j01L8L8M6M7O1O1o0n9L4L4L4L4K9K9m2m3j3j2N9
1886E058N9K4K4J14l1j96n3K02N8j34j35J21J21lkr2N1R3n1n1R3R8m7l8J07j4j4O7O8r8r8
1885E301P0P1onnnQ2Q2p8p7j9J25J34j0p8O7M8M9ooO6O6l6l6n4R0J30j3NMM1M0M1M1n6n6j37
1882E870QN9O0O0O0n5j98N0K91Qj35M7J92m0m0N8q5j56j1O6O6Q4Q4MLJ56J2j17K7J2j32k4
1880F284K16O1j80l9J05PQQ8Q8p2p2R6R6j5j5j5j6R3R3k7k7J5J5J5J5K5K5K6K5j2j1j2j2k8
1878F843k8J39J40k3k4k3k3k1k0k0k1J16J15mnj5j5j5j5M4M5M4M4P2P1%jQ1Q0l9j84K6K67
1876G631L5j08O9O9j2j2J12J13o5o4J09l6r8J42J00m5l8J06J51Pk4k3O9O8mlN7N8o3o2O6O7
1874H372O6O7J1J1J1J1P0P0O9P0m4m5K8K7L0K9K9K9K2K3K2K2J26J26r1r0K3K2K3K2RJ0RRM0
1872I238M1M1M0J%%%J00J01o8o8L3L3l9m0R9R9K7K7O4O4n6n5M1M2M1M1P2P1P2P1N8N8j3j4
1870A0222R4R4k6k6P0P0P0O9J08J07o1o1J45J44K4K4K4K5m8m8J27J27J03m1l8K02J36j04j34
1868A1398J06K06O1P2P2n7n7P3P4P3P4O0O0o0o0K2K2R4R4Q6Q7Q7Q6p8p9R0Q9p2p3J44J44L9
1866A2877M0L9M0J7J7J37J37r7r6J19J19R5R5R5R5J1J1J0J1L8L8J09J10J64J65mlN0N1J22
1865A4612J23R6R7K4K5Q0Q0Q0Q0n5n4J14J14J21J21J21J22M1M1M2M1J78J78J0J0N8N8N8N8
1863A6674J43J42k6k6R0Q9Q9Q9M2M1l1l1J08J07J07J07l8l8J29J30J18J17J41ko9J72K97N7
1861A8728j72O9L74J34p9O6J70K6J39J38J0J0J43J43O2O2J52Qn5J85J88M4J41J40J1J1K75
1859B1123K76M1M1J62J61P5P5P5P5J73J72J01J00K30K31l4l4K87K87k5J20L29Q9l1K09K71
1858B4579J27J41K86K26K26O7O7J34J35K06K06K13K14J41J41K66K65J1J0K60M03K63k6K7L15
1856B8903K97J53J38K82K64K64K32K33K32K33K34K34J62J62K93K92J49J48J30J30K74K73K29
1855C3941K29K29K29L64L64K21K20K16K15K88K88J68J69L12L13K69K69K69K69L92L91K47K48
1853D0120N35N36J99J99L67L67L66L67M61M61L17L18M06M06M79M78L70L71N14N14N58N58O30
1852D9897O30N65N65O11P54P59M70O06Q93R76O88P15Q60Q81Q82J034J035R82R82J051J339
1851F7175J389J245J173J462J542J398J479J767J760J759J922J922K062K063K336K480K555
1850I7489K843L140L140L254L542L872M160M548N029N484N772O319P183Q083Q755R458J0514
1849A92585J1691J2747J3839J4895J5700J6563J7392J8065J8292J8964J9685J9973K0098K0771
1848D31260K1353K1353K0998K0711K0495K0014J9499J8634J7708J6844J5728J4480J3045J1605
1847F83727J0008Q184O013L805J668n41k695m904o680q504j0477j2300j3957j5974j7930j9562
1846E99881k0733k1597k2020k2020k1295k0238j8959j7711j6235j4603j2929j1296r424p408
1845C63413n421l404j340O77K554M572O372Q196J0183J2391J4588J7180K0349K3902K8114
1844E02326L3780M0268M7469N5344O3889P2593Q0372Q7177R2842R7283J01221J04701J07678
1843A486943J10474J12875J14495J14207J11879J06981R9035Q8761P7155O4960N2909M2251
1843B582925L3164K5195J8496J2639P402K313k057n417q369j0963j2931j4756j7132j9725
1842B590784k2630k6182l0017l3955l8503m3401m7823n1376n4821n7990o0668o3068o5709
1841A994641o8686p2136p5880p9529q2699q5166q6414q6067q4050q0948p7203p2690o7984
1840I75189o3349n8835n4190m9293m4643l9745l4583k9303k4651k0138j5950j2204r276o491
1839E12538l971j955l9J784L657N482P445R461J1514J3530J5940J8340K1090K4066K7234L0402
1838F96518L3812L7557M1514M5836M9989N3734N7632O1185O4246O6647O9038P1439P3864P6456
1838A499467P9390Q2751Q6208Q9569R3050R6794J01176J06841J14183J23114J33161J43819
1837B749523J54172J62525J68300J71660J72646J71205J68817J65840J61991J57093J51643
1836D555415J43866J31825J15214R3907O7502L7829P775k1658m9023p2350r0689j05874j18260
1835D695479j27680j34690j40859j45949j49615j52400j53996j54284j53744j53073j51727
1835C077462j50096j48473j47033j45365j43156j40398j36653j31937j26078j19423j12222
1834A576628j04623r7230q9964q2955p6245p0004o4071n8022n1924m6066m0329l4280k8506
1833G32409k3225j8257j3744r999o447l439j039J061L271N119O368P676R116J0338J1394J2474
1832G23076J3531J4258J4930J5531J5675J5669J5812J5801J5513J5050J4571J4186J3514J2452
1831I29569J1204R691P867N639L238J113j095l042m867o463q096r338j0395j1531j2588j2852
1830H88054j2708j2075j0250o941k236L945J2300K3264L6996N3020P1745R2270J12724J31616
1830A381724J48229J61852J71742J78873J84538J89057J92610J95994J98780J98410J92937
1829C394746J81726J64154J39609J09938P8237M7030J7775p671k8652m6033o0759p2762q3109
1828C834229r2423j00495j06737j11657j15980j18654j19902j21247j22688j23737j24794
1827B575915j26234j27290j27321j26841j25161j21799j17119j11837j05812r9186r2485q6244
1827A208586q0278p4421o9025o3744n8487n3589m8634m3545l8588l4075k9816k6071k2795
1826E65518k0202j8046j6413j5069j3820j3005j2332j1492j0628j0111r824r403q732q269
1825C88172p981p501p021o832o351n859n379n173m884m271l984l735l447k958k814k753k466
1824C04763k289k288k276j987j867j867j579j291j224r37n49o8L40J012J802K665L650N474
1823C01484P849J0634J4223J8929K4719L1345L8415M5617N2321N8179O3040O6785O9528P1736
1822H74804P3813P5445P6630P7303P7074P5058P0641O3631N4341M3490L1701J9699Q307k160
1821A619777j1143j8730k5403l1260l6232m0360m3710m6302m8243m9300n0107n0779n1038
1820A117170n1182n1455n1743n1596n1116n0359m9112m7167m4958m2402l9617l6757l3973
1820E15733l1332k8931k6614k4597k2401k0384j8455j6630j5082j3258j1541j0101r068q012
1819B59327p004o332n816n335n068m780m320m033m062l919l597l453l365l221l077l076k649
1818A86220k649k650k649k154k154k226k227j881j881j881j882j807j808j736j735j556j555
1817A51789j628j628j468j467j369j513j574j287j295j439j534j390j264j264j452j453j381
1816A27383j381j282j281j354j354j197j198j318j317j186j186j065j066j057j056j057j057
1815A06971j007j007r08j052j142q54p34j023r19p75r05j048p93o50q59q59o48o48p20p19
1813H9701o47o46p18p19o82o82o83o82o16o16o17o16o01o01m33m33o71o71m08m07o69o69n98
1812G5616n97n28n28o00o00n51n51o71o71n67n68n67n68n44n44m72m72m86m86n57n58l95l94
1811F3141o11o10k75k74m91m90n13n13m77j89m01o88o71l82l53l52m06n50n58l18l89l90l77
1809E2863l77m97m97k60k60l80l80k32k32m01m00l13l13l85l86k99k99l70l71k99k99k99k99
1808D5015k51k50k50k51k98k99k26k26k30k31l50l50j31j31l95k51j8k59n28k88j55l95l17
1806C8935p6j55k99j94j93m09k64J5k25l78k33j20k63l09j65k54k55k12k13k12k13k48k49
1805C3811j76j77k45k46j74j73j83j82k55k54n7n6k82k81j68l11k13K8m9k88l54j14o0k04
1804B9337k28k29j74j74j02j02j32j32k04k05k44k45k8k8k93k92j25j24r8r7k18k17k11k12
1802B5223j39j40j87j87j14j15k28k27j55j56j10j10j11j10k87k88p1p1q6q5q6q5k35k34o6
1801B1540o6k30k31L4L4k3k4j43j43k17k16j%K5K5j43j43j06j07j07j07j3j2q4q5j12j12m1
1799A9192m0k61k61N1N2j29j29j29j29j02j01j02j02j86j86o7o6r7r8r7r8r4r4r4r4n7n8n8
1797A6366n8p8p9p8p9q7q8j59j60M5M4j71j72n0n0j22j22j8j9j8j9j17j18j17j18J9J8j50
1795A4245j50j30j30j0j1m2m3j54j54j10L3R7j44k04o0q4q4j16j15m4m3p1p0qpj10k54j87
1794A1840N2LKj42j42q6N8N8q7j06j07NNo3o3o3o3r3r2lj46n5Q9J7j27j28J6p4p4l1l0j51
1792A0219j50O9P0r8r9p5p5j02j02r1N4O2q1k04o0p8p8J1J0o2o2m6m7j19j18O2O3j06j06J2
1790H673J1o0o1q9q8j07L7J2j32j23K0j40j40L7L7j41j42K6K7j58j58J1J0p4p3kko1o2J0J0
1788G108r1r0j3J31Jj43j08L7K3j21l2l1n8n7p6O9N7q7j14L1j2j1kkj36j36qpq8N7N3j87j59
1786E798Q1qj53r0J51K5j19j06L7L8j07r8M6K7K8o0o0k4k4j2j1j2j1OOj14j14P3P4j81j82
1784D904R8K42m9k90j12J28j4j57J2J2LMj8j8r0r0K7K7m5m5K1K1K2K1j61j60N5N6r0r0j8j8
1782D188M8M9k4k4k3k2j43j42Q9Q8l1l2J6J6j05j04LLL9L9m7m7P4P3l2l2L9M0l2l2l2l2J2
1780C880J1R3R2n4Q9Q7j54j52Q7J59q1o9J70K00m0q2O1L8L7l4l5L7L7N7N8K1K2j1j1j1j0L5
1778D527L5l7l7O7O7j01j01L7L7l5l5l9l8Q1Q2j18j18J1J1m3J01J55q5l1l1j42KL02O2l05
1776D281o5K59J8j39OL4j12N1N1p2p2M8M8j26j27ppj8j9k35k35Q1Q1j36j35m1m1m1m1j22j21
1774C046n0n0l0l1j50j50Q2Q3l7l8m5m5m5m4M2M2p8p8N3N3j16j15k2k1N0N1o1o0N9N9j06j06
1773B142J4J4m4m3K9K9p4p4M7M6m8m8m8m8P4P3j42j42LMO0O0M4j96j34J07P1p3n8Q5l4l4k6
1771A636k5N6N5o4o4opp8p8O9O9n2n1ooJ62J62j38j38L0L0m2m2L0L1J3J4J4J4K4K4m8m8K6
1768A566K5m6m6P5P5m4m5K6K6K6K6n5n6N6N5K2j21k12P7J11l2j86J03K20o9j37PKLJ1J2j02
1766A373j03l3J10J35j53j63J26J63j25l5J09N6q8JKj10j11RJ0J5J5J6J5J01J01k60k59J81
1765A098J80q3q4R7R6j71k6K19o8j95n0O2O2jjl5l5l5l5L7L7l5l5K3K2K3K3l3l2L9L9n0n1
1763A002P0P0k4k3k4k3qpqqO9O9r9r9P3P3N5N5J03j85k03Q5J95r3j95R4K5K6p6p6O2O3rj0
1761A019m2m2K9L0k5k5M7M7j9j9k0j9mmmml4l4l4l4j8j8j8j8l7l6Q4Q4nmp6p7O5O5n6n5J40
1758H29J41j24j24M1M2p9p9J10J09j06j06O6O6n4n3J6J6J6J6L3L2l9l9m4m3J73J73j72j72
1757F45R2R1K5K5m8m7j0j0j0j0J22J21m6m6q5q5L5L5j2j1j1j1J2J1o1o0Q1Q0l9l9k6k5m4J00
1755G39R4n1m1J03j3j3o7o7lJ42P0p5r2r2p2P3J31j3m4m3M1M1M1M0k8k9k9k9K0J9n3n2qpJ7
1752F50J60Kk38p1J70n5k00Q0K24N5N6j03j04J35J34j30j29JJq9N5j6j60N6K01n1j94J69J69
1751G78j65k1K10l0j62j8m2m2J16J16o1o0J02m1n0R4K9j15m3J01P7o7K3K3L4L4l8l8m7m7K5
1749F75K5J9J9J9J9K1K0r0r0K6J70R8m6o4o4r1N3J57J4k6k6K9j16l5l4L9L9M0L9J4J4J4J4
1747H95L3L3q7q8N6N5j04j03M8J93J14j73j26J8Q8Q7q3q3r5J93J60j28k48M0K30n8j30J58
1745H95J28j61o1Q3k8k8j9j9L9L9M0L9o9o9LLO2O1j0j1l8l8L3L4KLKKO0N9j2j2l8l8l8l8L6
1743H96L5L5L5n0n1P0O9l1l1l1l1j5j4j5j4L2L3L2L3j%p3p2n2n2K12K12j40j39j9j9O2O2j0
1741I58j0mmp6p6R3R2K1K0rj0rj0J%%JK2K3K3K3m5m4K7K8%JJ%M0M0l2l2Q6Q7l4j77q1J59L4
1738A127j11O1K04o9k12Q7Q7r0r0R4R5R4R5J7J7j02j03L1L0L1L1j7j7j8j7K8K8J00J00r8r8
1736A315K2K2P9Q0q9q9L2L2m0m0L9L9M0L9p7p7M3M3O8O9j48j47J02J02o6o6J39J38j26j26
1735A352J40J39J9K0l1l0l0l0p8p7J38J39l2l3l2l3ONP7P8l9l8L4L4q8q9L2L2J1J1J1J1K5
1733A654K5K4K5L9L8L8L8j36j36Q0Q0J3J2J2J3m1m0m0m1L2L1J52J52j06j05J11J11j18j17
1731A800R9R8n9n9O1O1r7r7J20J19rrj0rJ9J9n2n3K4K5R6R6o5o6J03J02l3l4Q7Q6j32j32Q3
1729B182Q4J25J25m3m3j8j8N5N4J2J1J2J2k8k7J88J89NMNNL2L1L2L2K44K44k0k0O2O2O3O2
1727C715J37J38J37J37J79J79K51K51K93K92J72J73M09M10N29N29N58N58P26P26Q66Q67J275
1725A3507J275J286J287J598J598J433J434J697J697J778J777J898J898J744J745J744J745
1724D1141J576J577J576J577J336J337J072J073P75P76M79L34J7k72n93n92n96q84j066j211
1723D9432j498j785j920k065k345k489k417k417k401k401k079k080j912j768j795j507j286
1722A5267j285j174q86o92q36o92m04l20m64l26j82k92k91j62j62j47j47k19k20o4o4j84j85
1721E869j25j26j26j26N0M9k2k3j68j68r6r6N3N2o7o7j3j3j33j33J2J2Q5Q4p8p7p8p7K4K4
1719D502K4K4m2m2j15j14jkJ19J19k6k5r8r8J07J07o1o1q2q2L8L8p8p8R0R1j38j38J26J26
1717D230r0q9L0L1N1N2o9o8J00J00j16j15m7m7O4O4M9r5q7J54P7o7n2R2q2q3R5R5J0J1n2n3
1715D093q3O1k1k0KKKKKKJ1J1m4R9J15l0j61P9J51q9l5J09R3n0n0n0J3J3j5j4j4j4q9q9J27
1713D119J27l5l5L7L7qqr8M6R0n5n4Q9P5o9o9P5M8r6ook2k3k2k3M1M0l1l2P4P4m6m7QQJ69
1711D372K6j59j5J54Rr5N0m0m1K0J9n3n3J26J26m3J02M1j99l1K09Qj37J28J28q9q9J21k4M
1709D575J48Q8j52j0K30N6j85m1J02o5o6J6J6p4O9J42kj13L1LKJ2J2k6k6R4R5L7L8N6q9o7
1707D906P7P6o7p1P2j7j8K6K7K6K6j9j9N4N3K4K3L2L3j49nR2R1q9N5O5q0j34J1J36J37j02
1705E272j02J14J14o8o7N8K02o7k12J43J42j38j38J26J26q4q4J74L0j30J5J35rj20K4N4N4
1703E564l0k9M2M3K0K0K0K0k8k8J32J31J4j30j21J19J58J5K0J65L1j13l2J12n2n1L9L9k6J19
1701F183O7j73o9J70J02m2N2N2j73k9J95m5j77J59J27j13k8K11N5r0J5J5j24K0J49Nq9N5K8
1700F508K8J15k9j97n3J90J89j8j7J4J4K2K3j01M2J24k1j39NQ3Q3m3m4Q6Q6j01M2J24k1q4
1698F910N9l0l0M3M3p7p7J43J42o8P6M5j00j8J26JJJ9K0j24K1J50Nn3R0J54J54J11j28j25
1696G483K10J15j26K2J66l4l4J04J04r1N4J22j18l8K02O1q3M5M5j86N4K40%j2J32o6k10O3
1694H224K07K0K0J24j9j28J12J21k2M6M6n9Q6J91m8k02n7P6P6J3J3KJJ22J22N7N8n4n4k4J19
1692I189J29j6l6J07R0R0j5j4j4j5J21J21m8m7M2M2M2M2r7r8J67L11O3j77m2J02k1k1J50O
1691A0153p8O5J37pnJ39M9M9M4M4p6p5N1N2N2N2J7J8J7J8L7L7J10J09ooooK4K4o6P8K53J09
1689A1407j12j13Q1Q1j6J29J65p6q1J58J84n6j16K8J38noJ38K9j15n5J85K39jj3J31Q8n5m6
1687A2315R8Q4Q4R3R2j9k0k0j9J20J19M8M8O6O6O6O5P9P9OPJ07J08K9j15L0J74N5r0j5J30
1685A3870L9L9J11J10l4l3R2R2m2m3n8Q6J55q5j90N0L17J73q1q1N3N4ooopO2O1O1O2O1O1N3
1683A4990N2O6p8p7O6J56J56K2K1K07K07J53Qm8R6J68K4l5J08J81L7j3J32K03N9j04L9J75
1681A6971L0q1q0K46K47N2N2J24J24K1K1K0K1M0M0M9M9K9J72R1R1Q3Q3J72K9j09L5K81K80
1679A9183j00j00J40J40J09J10K60K0j68P2L06O6k13o9K53J08j11j10K07K08J02m1L9M0N0
1678B0501N0J47Km9J92L41J02j17J24K95J51L7L7K8K7J54J53J53J53M6M5K85K86L3L4J77J78
1676B3565J48J47J48J48J38J39J39J39J70J70R8R9J08J08l6l7J32J32O0O0K06K05O2O1K1K1
1675B6351J65J65M1M0M1M0K06K05K06K05J11J11J10J11J31J30N8N8J53J53L93L93j1j1L26
1673B9881L25qqJ36J35J08J07J08J07J61J60Q9Q8J36J35rrL23L23Q4Q3L48L49J09J09K62K62
1671C3894J42M30N52P1m2K45K78K78K97K96J82J82L26L26J67J68J67J68K68K68J96J95L35
1670C9389L34J91J90K11K11K12K11J20J20J91J92L06L06J62J62K89K89J21J22L90L89K07O3
1669D4378J71J70K82K82K82K82L53L54L00K99K61J16J39J39K89K89K87J43J34K79K57J13K03
1667D9802K03L21L20L39J94K25L68K79K78L99L99L12J68K40K39L42L42L77K34L14L14L34L34
1666E6677M95L52J06K50M17K74J84L27M54M54L10L09L01M45N66N66L60L59L44L44L53L53K50
1664F4850L94L94L93L76N19M57L12M36N79M18M18O92O92N72N72N57N57O29P73P27M86O07Q46
1663G7256O85N40P09P09O15O15O87O87Q55Q56P29N85Q04R48P39M98P14Q58O90O90Q02Q02O39
1662I3712P84R21P78P14Q59R80R81Q69Q69R08R09J076J076Q15Q16R65R65J018P30P29J018
1660A12492J136J136J034J034J089J089J210J209J206J205J133J134J163J163J164J163J163
1659A31923J163J163J163J430J430J310J310J600J601J529J528J656J657J656J656J615J615
1658A57005J621J909J987J987J771K059K276K277K294K295K601K600K601K601K597K597K765
1657A95843K765K790K790K959K958L079L079L246L247L465L466L520L807M126M126M168M456
1656B53890M745N032N104N104N273N272N440N441N818N818O083O370O582O869P421P902Q265
1655C56429Q745R669J0341J1106J2355J3747J4995J6820J9029K1681K4850K8857L2794L6348
1654F17766L9516M1865M3114M3450M3450M3365M3365M3622M3623M3255M2391M0560L7007L1833
1653A198182K5399J8161J0960M602o79m664p641j0251j2844j5221j7237j8444j8923j8648
1653A132752j8167j7196j6139j5323j4459j3042j1603j0582q949o637m237j464J896N438Q607
1652A010895J2099J6036J9619K3171K7049L1177L4742L8296M2400M6337M9925N3669N7835
1651A463250O1772O6092P1182P6356Q1636Q7731R4741J01930J09516J18651J28541J39200
1650B600598J51587J65627J81088J98552K18620K41289K66542K95447L27806L63020L99797
1649E409973M34893M64566M86861M99440N00124M92923M83498M70919M53335M36146M21473
1649A0554151M01020L69860L30585K80257K13137J36305O1886q758p3574j21394j50874j73469
1648A1819132j92579k00763k02012k06922k14316k16752k17808k23101k28573k29990k31047
1647I455269k32755k30932k26467k25027k25303k24054k24547k30019k34917k35398k35817
1647F930033k37258k34370k26016k18190k11565k02917j94178j89256j85705j80443j75163
1646D674972j70985j65512j58844j53178j48222j42172j35351j28918j22400j15967j10577
1645C122846j06256j02787j00387r8575r7328r6619r6139r4789r2580r0083q7107q3608p9672
1645A896916p5854p2109o8479o4925o1241n7688n4304n1135m7931m4570m1149l8364l5736
1644A183431l2951l0316k8298k6487k4662k2867k1235j9651j8018j6532j5091j3386j1562
1643I02375r510p493n273k680M91M236Q592J4259K0956K9118L8612M8887N8842O7580P4518
1642A243510P9415Q2062Q3502Q5027Q6851Q8955R0972R2287R2286Q9400Q2966P2554N8438
1641B328225M2410K6567J2056N2r371j6379k2490k8731l4316l8829m1358m1503l9020l4508
1640B102805k7813j9267r900r70P085J3326J7526K0120K2844K6589L1640L7689M4136M9800
1640B315610N3905N5154N2153M4567L3377K0222O791n404j5230k2814k9009l4866m0913m6771
1639B386772n2208n6913o0418o2243o3659o5100o5774o6255o7035o7899o8525o9389o9929
1638A551425o9449o7956o6132o3503o0143n6747n3386m9929m6569m3683m0707l7537l4753
1637H60931l2287k9501k6801k4209k1641j9240j7068j5244j3419j1979j0886r638q443p386
1636F13189o521n466m337l089j949l16J567L583N780Q565J1928J6058K1159K7592L5446M4568
1635G67757N4506O4396P3253Q0069Q4595Q7187Q8349Q9213R0606R2430R4482R5730R5443R2850
1634A950866Q6653P6187O1603M4991K8178J2717k93j0184j8008k4825l1607l8233m4531m9429
1634B044085n2261n3125n3000n1751m9362m6194m3490m1090l9012l7573l6448l5200l3231
1633A472348l0254k6224k1520j7126j3189j0106q281q354r793j2003j4787j7872k0272k1851
1632A240716k3099k4059k5115k6232k7288k8231k8902k9446k9445k9656k9656k9716k9715
1631H80156k9770k9770k9764k9476k9098k8425k7352k6103k4915k3474k2025k0585j9325j8076
1630E21998j6750j5693j4661j3413j2224j1167j0375r510q428p755p059o387n917n438m933
1629C72288m453m228l939l520l040k678k198j730j250o71JR14J969L225M856O825R418J2553
1628C84342J6107J9731K3092K5936K7953K9236L0101L0600L1079L2148L3011L3569L3856L3593
1627G84354L1960K8611K4098J8553J2503O526J437k872o425r338j2124j5364j8341k0482k1922
1627H01174k3267k3938k4335k4623k4935k5080k5111k5256k5406k5406k5259k4587k3788k2925
1626D57258k1610j9977j8598j7541j6319j5072j3811j2946j2063j1198j0118r253q534p669
1625B62549o841o169n431m950m482m195l969l681l538l393l133k989k878k734k511k512k503
1624A96640k503k249k250k249k249j901j902j910j910j614j759j857j569j460j748j730j441
1623A64339j630j629j347j347j526j526j261j262j414j413j246j245j304j304j232j232j102
1622A41319j101j102j101j241j241j073j073j135j135r66r67j150j150q86q86j044j044q37
1621A22187q37r12j056r57p17o52q92j005p66n38o82r94r93n88n88p57p56o15o15o96o96n89
1619A05286p33q68o28n27o71o96o95o86o85o85o86p05p04o33o33o75o75o03m59n83q24q23
1618I0409n84n80p25p01m61m56o00n77n76n94n94m74m73o41o40m73m72n12n11n11n12l72l71
1617G7999n40o84m99k58m21o60n12k72l41m85m18m19l55l55n16n16m43m44n08n09m36m37l72
1615F7599l72m43m44m10m09m10m09k73k73m41m41m33m34k66k65m26m27m26m26l46l47k75k74
1614E8929m02m03m74m74l04l04k33k32l57l56l57l57l65l66k93k93k70k69k70k69l70l70k98
1612E1243k97l25l25l25l25k71k71l44l43k77k77k78k77j53j53l21l21k19k20l39l39k39k39
1611D4765k39k39k28k29k19k20k94j49q1l21m38j98j37k82l55k11n2j96l24l23j64j65k28
1610C9473k29k29k28j31j31k03k03l22l21j53j53j53j54k73k73j61j62k33k34k27k28j55j55
1608C4762j98j98k70k70j36j36j37j36k46k46j75j74j78j79j79j78j95j94j95j94j51j51j51
1607C0495j51k05k06q5q5k07k07q6q7k37k37k1k2k29k30p0p1j06k50k50j06kkk10k09j54j53
1605B6617m3m2j24k67k68j23p9p9p0p0j10j10j11j10k31k31j05L8q2k27j36j37j31j31j32
1604B3506j31k06k06r5r6Jj43j82j82rqj85j85mj48k29q4j8j61j61j8k6j70j53j52o2o3j34
1602B0296j34j22j22j22j21r5r5j85m0k7j70r9M6q8k32j03M1j33j32n1n1j90j89o0o1j52r
1600A7600j7j7j44j44p1p2j15j15l4l4k15p0J13l1k96n5J12j27j74l0l7j80r9M4j17j18o0
1599A5497o1o0o1j60j60j30J4J2j33j33J1N0r3j71j72o0o1o0o1l2l3j05j04j4j3j24j24k32
1597A3227q8M8M7j35j36m6j89j52rqj52n0R4q3k27J0J0j67j67mlmmj94j95K1K1j40j41K7K7
1595A1238j05j05r7r6j19K6R7m7j67j66n6n6q3q2j1j1j19j20M8M9j41j40J8J8j08k52j00J41
1593I454O4q0j03j04l5l4l4l4r2r1r1r2K7K6r3r4PPk09k09J19J18L2j13j67j66M0M1l5l6r8
1591G925r8KJ46j3j57o0Q4P5o9j35j36k4k4o4o4o5o4m6m7m6m6NNj06j06k1J23l5j80j96n3
1589F510P4P3m8m8k4j68r2J48J48r3j66k2LKr4r3o4Q1jj44p3P2o9k12M5M6j38j37P8P9j44
1588E529j43k3k3j13j14J03J03m0m0j12j13N8N7k1j64l6J08J9J8n7n6o6P8POK4K5j57j4K12
1586E055O8k01n8O3q2k1J22m5j89KJ46j12j12Q5Q5j32j31o8o8o8o8J6J7J6J6j02j01J9J9j63
1584D008j63N3N3r4r4K6K6r8r7P1P1j11j10RJ0l4l4l4l4kkp4p4p5p5J40J41j72j72M5M4o1
1582C087o1J1J1j08j08J08J08n6n5n6n5l1l0R0R0p7p6nnL0L0m2m2PQPPm9m9K3K3J17J18j47
1580B823j46Q4Q5j17j17N0K90J16k8N0N0L2L2R6m9KK42J30j10m0J03J12J13JJr4r4r4r3K7
1578C457K8r3r2k1k2r3r3o6o6NOq1q2j0rj19j19j19j20N7N6o3o4k4k5k4k5P2P2N4j86j43R8
1576B146M3j00p6J64J64p7j18K6J1J1k9J15N1r2j24K1R2n2p2P2j8j8P7P7r2r1m5m5o3Q2N0
1574B090r3m0l9l2l2l1l2R8R8k2k2m8m8o7P8j0j53r3J46J3k28M8J93l6j79m2J02M1J84J84
1572B028n5m3J01P7P7O4O3J00R9l5l6J81J81J8J8N4N5k5k4r7r6QQj54j0M2j03j93M7L7j06
1570B281j28J7o8o8O2O1k02k02J09J10N6N6j60j61L7L6q3q4%jj17K7N4N5N4N4J10l5j22j22
1569A626J02J01o6o7N4N3k05o0J18k7j52rJ27j13j23J18J30j57K0K0r0q9n3n3L7L6j13j14
1567A051l4K53Q5k02j5j4Q8Q8O8O8O9O8j43j44K17K17l7l7J32J31m5m5P5P5J29J29N7N7J47
1565B488J48o8o9J95J95J23J23O2O1K5K5M5M5M6M5j7j7N5N5rrO2O3J43J43j69j69L4L3klj1
1563C671j2K5K5j18j17R9R9r2r2l8l8j41J47R3j95j87J01M0M1j6j7j84j84J02J01j14j14J05
1561B990J05j5j5jjP1P1N2N1N2N2J35J35J6J5J70J70KKJ51J51L2L1J35J34J35J35N3N3K21
1560E288K22K6K6J07J07p0P4J49r1j62J74J93m8j33J06J58J4j29j29J08M44K72o5JK42J40
1558G024lK13K13K3K3K39K40J74J75J75J74K25K25N6N7M0M0m1m1K4j19j16J23N9j80j81N9
1556H900J07j32j84l9k8k7j8j9MMJ66K3j57j2N9q4L9J84J02m1R3R3Q5Q4K9K9L7L8mJ39K21
1554I691P7l9J04R6R6J82L25J57J4R5R6rJ34J63p7k2L13J18k19P3L13R1R0J93J93QK48L95
1553A2899N9l4L01L41J97K20K19J39J38K33K33K33K33J61J62K82K82J78J78J78J79K09K09
1551A7429K10K09J79J80L38L38K34Q9O3L51M10J23r4J95O03L16M6J89L81K36K3K3J23K67L67
1550B2828P8m9K38L56K12J13J12L11L11L57K13J15M02L63P6J83J84K47K48L56O8j38J50L71
1548B7705K28J47K90M65M65N85N85K25K25M70M69M70M69N90N89N20L76L45O33P13M26M99P87
1547C8276P15M27P48J036P69O26Q87Q88P59P59P76P75O77Q20Q87N99P58J045J099Q10P08R97
1546E5841J138J138J084J084J045J045J166J165J172J172J100J101J133J133J061J062J182
1545G4822J182J254J254J417J418J538J537J596J595J596J596J777J777J849J849J816J817
1544A01690J984J984K038K038K321K320K332K621K741K740K672K959L176L176L214L503L557
1542A47066L557L827L827L928M217M554M553M643M931N259N546N763O050O404O691O811P099
1541B34726P529P817Q080Q561R161R642J0073J0554J1063J1928J2732J3405J4427J5676J7069
1541D02443J8316J9604K1044K2593K3841K5031K6278K7576K9207L0978L2995L5527L8312M1126
1540G94871M4486M8303N2432N6963O2436O8955P6155Q4182R3688J04598J17178J31839J48836
1539A884922J68352J90918K16008K42990K70214K95275L14586L26012L29949L27741L21549
1538D888516L13772L06653L00989K95133K86396K72137K49186K15538J70695J17175O0039
1538G476229N770l9648p3629r6771j11750j21832j30727j41000j52623j64242j74036j81047
1537F094694j85601j88194j89827j90882j91810j93442j95771j98748k02224k05779k08478
1536C943938k08958k06699k02186j95272j86150j76278j66386j56569j47062j37717j28211
1535B032450j18873j09751j00621r0731q0541p0458o0243n0353m1866l4473k7472k1615j6801
1535A208652j2097p261k749J464O169J0937J5642K0924K6973L3253M0456M8953N8460O9209
1534A518985Q1787R6420J13224J33289J56432J81998K08981K35642K58975K76404K86487K90169
1533C838793K89303K86568K83783K81989K80932K78759K72711K59633K37067K03938J60441
1532F673917J10282N9101J3382k3204n0153o8878q1733r2200j03372j16143j28601j39645
1532F052753j48603j55036j59092j61878j64138j66155j68460j71244j74682j78620j83122
1531D221723j86866j89022j88734j86237j81532j74967j67381j59290j51513j43698j36113
1530B356370j28671j21661j14480j07279j00076r2491q4213p6051o8213o1012n4499m9219
1530A298505m4789m1044l7848l5448l3238l1223k9218k7393k5965k4717k3500k2252k1147
1529I00723k0475j9566j8510j7693j7022j6530j5857j5042j4370j3871j3583j3031j2743j2377
1528F80053j1705j1327j1326j0856j0183r980r979r519r040q787q787q401q112p884p596p266
1527E29305p266p136o849o693o549o329o330o200n911n747n602n519n518n504n215n181n181
1526D26575n061m773m830m829m596m596m576m576m313m312m198m198m012m012l937l649l499
1525C52608l499l435l434l363l362l107l107l007l152l267k980k892l036k969k825k842k843
1524B99488k682k682k514k514k463k462k463k462k401k401k280k281k371k371k194k193k197
1523B58557k053k026k314k244j957j888k032k059k058j909j909j998k142k112j824j801j946
1522B24285j928j783j819j819j738j738j701j701j820j821j688j687j520j520j646j646j718
1521A94992j717j688j688j759j760j664j664j672j673j388j531j601j360j247j487j480j241
1520A68372j211j355j259j259j265j265j097j097j243j243j027j027j168j169j000j000j046
1519A48641j047r74r74j038j037r65r66j039j039r19r20r34r34q62q63r43r43q71q71q79q79
1517A28744q79q78q88q88p20p20r08r08q35q36q20q20p01p00q74q75p54p54o05o04p15p16
1516A11346p36n92o01q42o92n48p16p16o06o07q71q70p04p04p04p04o85o84n65n64p84p83
1515I6068m71m71o35o35p07p07n69n69n84n84l91o30p45o00m37m37n00n00o26o26l62l62n80
1513H3340n81m12m13n11n12m06m07m32o72n13k73m05n49l32l33n00m99l80l79n35n36m63m64
1512G2833m81m81m99l56l21m66n01l58l67n12m30k87l97l97l88l87l52l52k79k80m61m61l74
1511F3646k30l61l61k80k80m03m02j45k89m12k69j09k53k47k47l29l28j73j74k46k46j62j62
1509E7538j27j26k58k57j38j38k72k71k00k00k93k93j82j82j82l26k14p1k20l63k01k01l76
1508E2447l75k46k47k86j42j39l79m22q7j47l86l95k51k75k75l40l41l04l04j09j10l25l25
1506D6237k22k21k58k58j47j46k19k19k12k12k36r2j16l56l47j07j85j85r7r8j85j85j84j85
1505D1565j82j83j82j83q7q7j23j23j36j36o4o4j32j33j2j2j9j8J01J02K45K46J25J26K54
1503D0888K54K00L43L55K10K77M20K35mN8N8p9k24k14k14l04l04l77l76k74k74n93p36l98
1502C8927k53n60n59k98k97m18m18m57m58m66l22k95k94l13l12m08k64q1k24l48j08k9k70
1500C1475l28q7j57l00j33j34k02n8P8j63l30r1O9p6r9j00j75j76r5r5k27q2p4k17j44%r9
1499B7980r8q9k33k42r8K1j23j53j54j12j12j04j03k19p5o6k10j24K0J1j33j27j27j45jj41
1497B5043j41j1j2k46k46l0l0k08k09m0m0j22j21n0m9j47j47p6p5j16j16m3m4j20j20j20j20
1496B2244l8l9k07k07k6k5k5k6j05j05k25k25J6J5m7m8k27q4J48r3k55j11RRk5k5j46j45o5
1494A9917o6o5o5m6m5j66j66k7k6r9r9l1l2k08k08Q2o1j30J09M0k01j29J11o6l06o9P6q6q5
1492A7853p6p7j6j6j85j84J26J26j85j86j18j17m5m5j0rq1q1o1o0j23j23K8J72p6l17o0Q4
1490A6138j1j2j30j30j31j30J4J4J4J4j01j00K0K0j72j72M4M4l4l4l5l4m1m2m1m2m1m2j46
1489A4701j47n2J89O8j72j95j96NJ50J03j36j12j13p6p7mnn4n5J8J7l4l3j06j06L8L8k75k74
1487A3105J05J05j59j59l0l0l0l1%%%%j48j47K1K1j60j59N7N7llklj78j78n8n9Q7Q7j29j29
1485A1850K7K7r3r3K9K8m3m4NMo7o8K8K9j01j01O2q1j44R5L3j10l3J11n5k00l1J13l3j76r6
1483A0872M9M1M1j18j18r9j00j00r9N8N8j4j4l4l4j05j06P2P1%jj47j48J17J17r5r5k3k3l5
1481I988l5l5l6n6n6O4O4o9o9o8o9l5l6l6l5j2j1q4q3rrqro9o8LLr1r1K8K9m1m1j13j13J04
1479H796J05j6j5m3m4m3m4jjkjK1K1o1o0L4j09j37J51J29j60j32J1ONn7n8O9O9r9r9r9r9O9
1477H106O8m7m7K4K5m6m6K6K6p8p7K2j23j63J25J25j63o1Q3O5p9O8O8j09j09o7o7MNj14j14
1475G330OOL4L3L4L3k5k6j75j75o7K21O2k27j9J25L5j09K8K7j01j01M0M0l2l2MMo7o8K1K0
1473F879K1K1q0p9Q8Q9j10j09O1q3j20J68P7o6o2o2JJo4o5N6N5j56j56J08J08o7o7o7o8J10
1471F362J10n8n8l6l7l6l7l4l5Q5Q5j05j04J11J11p6p6p6p6m8m8K3K4j9k0N2N3o6o6N4N5j7
1469E997j6j6j6NOj15j14M9M9p2p1Q4Q4j14j14p8K10P2k17l02J77K97j82k36N3K00q8q1O4
1467E515M5r9k0k1l0l0M3M2l0l0pqppk2k2k2k2L6L7l6l5NMNNo7o7N3N3j9j9P7o6j14J27O1
1465E308j79j30J11J23k1j54rO9O8j19j20M8M8j4j3j3j4M8M8p1p2p2p2M8M8pqQ8n6k14K5J45
1463D867r5j11L2J7j27j8j9k8k7J76J76j37j36KKp0p0J0RJ0RJ6J6J5J6j03j02O5O6j1j1J09
1461D548J09j25j25nnn1n1n2n1L2L2m0m0M7M7M7M6L0K9r1r1l2l3Q8Q8q4q4j3j2llllj4j3j4
1459D105j3j9j8j8j8r1r1J26J25n5n5J7J7j5j5Q2o3r9J41j5k55j17K20J51q9p7p7J8J9P4o9
1457C826j33J07J27j7q9r0o4o4J03J04n1n1O9O9p3p4p3p3J26J26r0q9o5o5j37J03J45Jo5P9
1455C622J29j5j41j41p7p8M2M2R1R0l0l0m9m9K3K2j3j3j2j3K1K2r8r9J54J55j58j57P9P9j36
1453C262j37J26J26n0n1K1j23p1J68O8j72l1J13J%J06l8j96M5J65p6j41LK7K6j7j6j7j7k9
1452C075k9k8k9p1p1R7R7j02j03P5P5k3J22J7k23r3N2m5m5J55J55j57j57J45J45p2p1k6k5
1450B840M7M6J1J1o2o1L9M0l3l3k9l0M2M3R5R5p3p2lkkkO8O8j00j01KKKKn4n3l0J14J15j24
1448B818j34J1ppJ22J22p4p3jjj5j6q7q7L5L6L5L6qrqqj5j4N7N8k3k2M9M9q4q4L6L6l8l8l8
1445B609l8K4K3K4K3l6l6l7l6L4L4l8l8LKLKj8j9j8j9p4p4J42J42n7n8n7n8M2M2M2M1m0m1
1443B440m1m1o5o6N5N4o4o4J04J04q8q9J28J27j23j23J02J02j32J1Q0j59j32J09J75o5j33
1442B206J2J16k7mlp6p5O5K10N6j83p9O6k2j66P6P5onPQQQK6K7m6m5j0rj0rJ8J8n4n4J03J04
1439B326j13j12O9O9llm7m6K5K6j3j3j3j3l4l4Q6Q6m5m4m5m4K9K8n2n2L4j11o5J74K44r3j94
1437B007n1J22k3mmK4K4K4K4j39j39K9K9K9K9K9K9n3n3J9K0qqqqK9K8m3m4qpqpJ5J5n7n6R2
1435A889R1q0q1J13M1q0O4N6q8p9O5j0j0M8k4j63j9O3O3J7J7n5n5M4M4j24j24O4O5qqj1j1
1433A714O2O1p4p4M6M6k0j9N2N2JKp1p0J54J55j10j09L6L7j31j32P7P7NNppqpj2j2j1j2L3
1431A729L2L3L3k2k1k1k1ppopM7M8p9k23N5J99o5k09Q2K25m2j87R7J69qq1l6l7j9N4j2j56
1429A537PJ52M3j01r6M8N5j7j3N9kp5R1R1r7r7J20M9j87m3J30j5n9Q5J3j31m1J03n9n9R7R7
1427A685p1p1M9M9k3k3j3j2J07J07j03j03J7J8ppp9p8N4N5J27J27m7m6m7m6l6l6J32J32j37
1425A674j37L2L1j00j01K0J9J10J10n8n8n8n9O2O2p2p3M7M8j7j7j7j8N8N8j4j4K1K0j00r9
1423A360P7P8m3m2Q4Q5l5l5n0n1n0n1RQQQppppM3M2p7p8L2L2L2L2j8j9j9j9n3n3J15J15j43
1421A296j43P3P3L9L8L9L8m8m9m8m9J11J10n8n7l1l1l0l1R3R2j23j23Q2Q2J1J0j06j05J5J59
1419A329R5j44q1O2J1J1K0K0o4o4J04J04j30j30M7M6o8P5Q4o0r0N3J16k8n3n4J0J0o1o1l1
1417A078J13J36rl8l9klPOj01M3J23k0j21K4K3j21n0R4Q5n9J1J1JKJ7J6n5n5k9l0M3M3k8k7
1415A089Q3Q3j0j54p4p3L7L8L8L7n5n5J14J13j06j06O2O2OOR6m8r3N1N1r3k5J18L8j06l4l4
1413A056K9K9%%r0N4J26j8m8m8J5J5J6J5n2n2K0K0n9n9J09J09K4K3K4K4q5q4j2j3M5M4M5M5
1411A267K0K0j42LJ67K3n5n4O0O1k9J15J34j0l9m0k9k9M3M3m5m5K6K7LMLML8L8L8L8KLR3n2
1409A704j41LQ1Q0m5m6J16k7j72k8J47J46j46j47K7J72P1p3j36QqqJKPPPQN4N4n7n7l9J05
1407A670M2j02q3O0k9k9N1N2N1N2q6q6j3J30J09j30j37J03K10l1r7r7J23J22mj48n5Q9Q9n5
1405A771p8O7R6R6k6k7Q4Q5K5j18j18K6m1m0J70J70m8k88l2K07N3r1O8O7jj45p3P1K7K8q4
1403A901q4M6M5p5p4O2O3j5j60l2J13n0n0J4J4q1O2K06l4k82j39K7K7L6L6n1n1O9O9m7m7M3
1401A561j01l8J07Q8j52q9N5m1m1n1n2q1J59J68p1p5O9J6J5l9l8q1O3O1j80j06J34O5p9Q6
1399A332Q7j86j87J18J18m9n0N0M9k2k2l8l9l9l8N3N4j8j9m7m7j6J27oj49l0J15P1p4J7J7
1397A132llp5p6llmlP7P6q2q2j37QJ42J43k7k6O3q0j44JJ11l2l1l1m0m1K9K9K9K9LMo9o9J
1395H16KKJj4j4j4j5O9O8lmK5K5K6K5r7r6k4k4q9q9J27J27l1l0M1M2l2l3l2l3N1N0j3j3m7
1393G50R6R4j46j17J24J27j8p2p2rrK7K7m5m5J06J06o3o2j2j3j2j3P9P9q9q9P1P2j45j44J31
1391G14J32q4q4M6M6k5k6J0RJ0Rq8q8L2L3L2L3q8q7kkp4p4L3L3L2L3j9j8j8j9P4P4LKl6l5
1389E23l5l6M7M6M6M7r6r7k4k4J9J9J9J8JJJ%l2l2Q8Q7J9J9n3n4K8K8K8K8j9j9j8j9kkklR1
1386F36R1k9k9RJ0o2o3J40J40K0K1OOOOJ21J20r6r6N3N2N2N3j10j10N9N8k8k9k8k8l6l6l6
1384H43l5J1J1J1J1poppJ3J2J3J2qqq1q0P6P6m4m4j1j1j1j1MLLLj0j0q2q2O0O1O1O0j18j18
1382E53LKk8k7R2R3p3p2M8M7o0o1J2J1M2M1p8p9P5P5LLq9q8q9q9J06J06Q7j52j75O5K33pj58
1380C72Q3J81L7n2n3o2o1K4K4J6J5R3n0j71k7J28J28p9p9q7q6Q7K32M2j01j2j1O8O8r9j00
1378D68M7M7k5k5J17J16j54k98r6M8P9P8Q7Q7l2j77j70P0J27j7p7p7J69J69l4j79n8Q6k5k5
1376C26J46Kj90m5J71K6j08L5L6j08n4R0Q2o3K6K5n5n5M5M4M5M4m5m6l6l7q5N9J31j3j3j3
1374C67k2k2j8j9M5M5O9p6q4O0J00m3j63j9K13O9j05j04J26J26j38j37L6L6L6L6l6l6l6l6
1372B70K5K6K5K6m2m2P9P8m3m4P7P7j08j09R9R9M0j04j12L1J14l0j02M2M8r6q4J56J00j40
1370C56j41J00J73o7q5q5R3R3K1j23q0J60J07l8r7M6K9K9m1m0m0m0m4m4K9K8K8K9m4m4k9k8
1368B11O1q3j08L5J95N1p4p4j0j1O9O8n1n1J9J8J9J9j9j8N3N3q2q3Q5Q5l6l6O0q5j47R4J50
1366C77Oo4o4jjj5j5J06J05rqq1q1J26J26r0r0k4k4M8M8o5o5l5J09R7m7p7p7J51J52N8k29
1364C47j31J3L5L4Q7Q6j29j30J03J03j13j13N1N0N1N0p5p6R3R2n2n2n2n2J54J53k06k07R4
1362B08R4k7k6K9K9m3m3K3K2L2L2l9J05L6k52j5K72l6l7J39nk24O4J47j41j41J47J48j39l2
1361C27l2j6j6N6N6n7n6O3O4l2l1l2l1M9N0n0R5M4k44q5K04J37j51n2R2o7o8O1O2JKJJM4M4
1358D33j25j24O9O9llj6j6N5N6j5j5j5j5K0K0j01j00M9N0k2k3K2K2K2K2J7J7n4n5Q3Q3q6q5
1356B36Q5Q6l4l5K2K1n1n1l0l0M2M2j02j02O5O6o4o3J04J05K1K0n7k02K1J65j3j56O0O0j16
1355A15j16J34J36l3l3p2p3N7N6o3Q0J50r0j02J38J23j17k9l0J8J8K1j23j2J32J16k7j53j53
1353F8P2P2oj50R7K41p9k24M1M1o4P9J52q8j66P3J38j03m3J01M7r7ppJ7J7L5j10j1J32J3j32
1351A49pJ38K9k10j71O9Q5Q6NMo8o8J12J12qqJJp2p1l6l5L6L7R4R3J6j29n3R0p1p2J51J51
1349C80k18k18J83M0k26N9K36n3j63J24L3j11r2N0N2N1j2j2M1M0j27j26P1P3JJR1R1p7p7r
1347I6qo2o1j06J81K00q7k15P2N5q8m0J03n7n7J02J04o5o4L6L6l6l6K6K7K6K6r0r0P6P7kl
1345G6klQQj11j13J60J61n5n5LMLLo5o5J01J02j12j11N5N5m6m5K6K5J%J%k5k6n4R1J75j12
1343E8k70J8J27J26p0p1N0N0k1k1J0J0QJ0l4l5l5l5R3R3p3p4kkklK4K4m8m8K2K2J4J3J16k7
1340A7l5J06M7r8q8N5j08j08P5K17J7j27l8l8rqrqN7N7j4j5O0O1j9k0O1q3k17K2J84L9p8q0
1338a25m9m8J10J11M5r7j7j7n3n3O7O7J6J6K4K4j22K0J01m2j60j7l4l4R9R9O0q4RRj%J0J0
1336e6K8j16r4N0J21k2j17K7M8M9L1j13j21K2J71K7r3N1Q7n8N6K00J0k29m8R6j3j4nnq5q5
1334b00j2j3N2N2k1k0L7L6l5l5P3P3r5r4P9P9q9q8k1k1R0R0Mj39l5K06P2p0K4K4j75j76Q8
1332b60Q8J9J9K8K8p4P0J32j06j39NK9K9L8L8q2q2N2N3N2N3k9k9k8k9m0m0L3L2N1N2n9o0N
1330a51J50R1j47j08L7J3J2J1J1J1J0k6k7k7k7K3K3L2L2j02M2J12j29j56Q5J56q4j48R2J43
1328d6jmlq5q4P4P5KLo1o0J1J2MMMMM8M9k4k3k6k5k5k5N6N6M7M6Kj42r1J49J70p0j29J5L4
1326e9j11MJ48N3j85j24K1J05J05m5m6m8R5R5m8L1L0K2K2l2l2j21K3K34R1k74k74J12J12q
1324a04qL4L4j29J6J61J8j49oJ64K1j13j15J65K0k04o0J94N1j24K1J71o8j25J9O0O0M0j04
1322f0j13L2J03m1q4O0N0r3R9R8j24j26P2P2%%j5j4j5j5L8L8N4q7j41LL3L2ool0J14J75o3
1320D0j41R9K2k15r1J50L5j08J07J07j18j19R7R7l5l4l5l4J5J5J5J6RRR8m4r0N4N4r0l2J12
1318c5J02m1j00j01M9M8J7j27n6Q9O3O3p8p8p3K14J33j1m9m9o7o8P8o6r4J95J46j41m2J00
1317B1j12j14O4O4k5k5M7M7r1r2P7P7q1q1L9L9klR7m8j39J49J48j38p0P3N6q9K5K4J5J5o5
1315i8o4QPk4k4M9M8M7M7j21j22R5R5p3p3P4P4j43j42L6L6L7L6k8k9R2R2o0o0J2J2j02j02
1313c68J62J62n9n8n9n8k6k6R4R4k0k0k0k0Q8Q9q0p9Q7Q7q1q1J7J7n6n5M9M8M8M9j25j25J00
1311b25J00r0N4K14p1j81l7L1L2o1o1N9N9K5K4m7m8rj0j0j0J02J02o6o6j2j2mlm9R5J23j66
1309b18j53J36J56J3n2n2J1J1j15j15J49J49l1l1nj48j30J57J58j30m8R7j1j2L4j11j37J50
1307b78J74j14j78J11J12l2O7O7j8j9r1r1K2K2n0n1O2O3j0j0O5O5n5n4k6k5R5R5j34j33Q3
1305b66Q3m1m1L1L1m7m7K5K5o2o3N8N8L5L5l7l7J9J9J9J9k2k1k2k2J8J8J7J8M0M1M0M0p7p6
1303a92nnN1N1p0o9O0N9p0o9J76L2k31N6J65p6j33J2Jj43O7K11R4j45j45R4P9o6n4J86N4k82
1301c07k05J32J50Oqpn8J5J80L6j49p7Q7J5n1K2Q8J7r1r1J9K0L8l4j8J26J01j39j97n2J20
1299c12J21l9l9J7J7J6J7NNK7R9m6j90k7J17Q1o4j9N3K6m5jjq6q5n1R3P3KJP4O2q2q6N8J09
1297a00l5j03M2n5j27OJ49M2l1Ko9j19J22J32j08j08J32O1j80o0J81J12l2o1o0M1M1Nj40k8
1295c48J15M4j01J4J57J01j40j54rJ15M3k7k8L2L2R5R4n1j96j24K0J02J03n7n7M3M2M3M2n8
1293a13n7L2j12j09L5J95N0j62j61Q5Q5N7q6noJ2J2J2J2o3o3N6N7L9L9q1q1J06J07k9j73J1
1291b99J1q9N6J07l8l7J07mj47O8K12o0k05K1J64j2j2lmm0m1K2K3J29j4j02j01K9K9K9K9q4
1289b56q5Q4Q4k0k0O1q3mmj3j3RRJ%M5j00m2J01J17j23j30J11J16j24j28J7N0N0N9N9j06j05
1287c83O2O2O3O2r6r7l0J14J22k1j13L2J42kj31j31J24J23p1p1M9M8K2K1n1n0N7N8j11j11
1285c08J48J47j17j17J7J7J7J7P8P9POj48j47O8O8J3J4j07j07J28J27m1m0j1j1O2O1K0J9k
1283d3j45q4K04R2j93k28O0J77L3K7K6j50j51J50J49j14j15J36J35l2l3P8P8j37j38Q0Q0q8
1282a46q8j6j6J03J04q6q7j4j4J05J06j11j10O3O4j04j05J07J07j12L2J46j42j42J45Q2o3
1280a92L6L7k6k6k6k6o7o6J01J02j2j2j1j2L3L4L3L3j4j4N8N7M0M0M0M0m1m1L1L0J15J15n3
1278C36n4L8L7L8L8q0q0pqJ4J3J4J3N1N1k1k1m8m9J19J20k29k29R2R2q8N5J91n0l7J06o1o2
1276B94M3M2k9l0K3K3J4J3jj45N0K89J5k24j56j2j3j3mmO1O0O1O0j24j25M3M3l6l6Q3Q4q0
1274B69q1qrM9M8k4k3o8o8N2N2M6M6k6k7Q2Q1RRK7K8K7K7j4j4j3j4K1K0K1K1lkO9P0j81j81
1272C18J31J31k1k0R9J00lkklJ2J2J3J2k1k1N1N2o1o1O9O8r4N1J85n5j10L4N8N8k8k8n1R2
1270I65J14j27o4Q1m5m4J33J33q2q2J34j0j99M1J61p9r5M9K5K6k0k0N2N2k23k24Q8Q8LLR8
1268I32m5j67P4J45r5j11L2N7N7l7l7L5L5q2q2K30K30j50j49O7O7QRJ04m0j02J37K43R8K9
1266A492L0j00j00J1J1K0K0MJ47J45r6j50Q9J62p8j65P4Q7n7PJ52L1j12l9J05J5J5L8L8q3
1264A713q2J57J56j1j2J15J16j01j00J0J1J0J1r3r3r3r3j07j06j07j06j7j6k33k32j41j42
1263D14K8K7j16j16N3N2j99j99O4O4r0r1P7P6rqrrJ16J15mnM5M5O3q1n0R4J66K2oJ39J39n
1260H02J6J61J52Qq5q5k2k2j4j3P0j69k40R6J68j68k30J1j0k50k12k12j08j08j76j77Q7Q7
1259f43j40j41J71J71j37j37J26j7j94M5J51Pr2r1J07J06J45%l9l9O2O1O1O2J1J2J2J2J2J2
1257c24J2J1K9K8Nj40r0J50R6m8r9M4l6l6p4P0Pj38l8J06R7m8j38j39J16J16n0n0K2K1r2r2
1255g02P1p4j66k1J05J04m7m8m8m7j6j7j6j6j9k0j9k0J1J0KJR0n4o9P5J65p5k91n1K03N8p0
1253a011p1R6m8n7Q7J39np8O7J76L3KKp4p4MJ48J63J9j07j07P6P7NNRRRRr3r4K7K6k0k0N2
1251f19N3n8n7O3O3N9N8K8j15o1Q3Q4o1j61j7K8K7m3J97J40j00j70O9O4j77l2J13n6n6P4P5
1249e05m5m6M8M8k5k4nnp7p7L1L0L1L0Q7Q6j30j30L7L7J4J57J30j11j67k4Q6Q6N9N8J5J5n8
1247c44n7L7L8R5R5Q0j61j33J07M6r7L4L4p9q0J37J36p9q0qpK1K2K2K1J1J1M7M7q0q1M0L9
1245a66j1j2J6J5m8j93p2P2J05J05noNNR4m9j40LJ72K8r7M7J19k5j50pP2P2J4J5j0j53j26
1243c11J15J72K6pqq1q0L9J82j7j8o5o5m2J02P5j63k9J15n3n3P6P6j24j24J40mj09J31J87
1241H3M3j21j21n3R1L7j07m7J93J9k19l1J13o1o0J65J63q5q4M1j03j03M2J20J18k8k8k8k9
1239h0k6k6M6M5m5m6j0j0M1M0M1L9k3k4k4k4NOOORJ0J0Rl0l0ONq3q3Q5Q5L2L2j37j36J24J24
1237c1r2r2P9Q0QPn2n2j6j6O2O3O2O2j02j04J12J11l2l2j51j52O6O5O5O6m7m8P3P2QPj11j13
1235a75Q2Q2j34j34K4K3j2j2O6O7n4n3ooO6O6j5j5N7N7l3l3Q7Q6r0r0L0L0K6K6m5m5k9k8J7
1233a17J6q1O2K44Nk50j06J09J10n7n8n7n7Q6Q5q3q2J33J33q1q3llklN0N0j50j51P3L12N8
1231A02j82n9Q4Pj38r9M6P5P5O9O8r9r9K9L0m2m3J36J34q0q0J%JJOOOOj6j7j6j6L9M0l3l2
1228i0J7J7n5n5qpO5O4M7M6p3p3kkq3q3J26j8q8J53J63p5q0O5l5l6N5N3k02o0K26j4j54Q6
1226a10Q9n5rrj8j8L6L6o1Q4P2j67q7J53n5n5J28J26j44j45J20J18p8p9M1M1n5n4O5O5j3j3
1224e1j2j3J4J5J4J5n7n8J5J4m3m4K9K8O0O0o9o9R5n0n8Q5lj47l9K01M2j99p9J61J30j10n0
1222a73R3J07l5j9j8K7K5J8J7N9q5j66k2J76L3j40j41J38J37j26j26J45J44k8j72j7J27J17
1221I5k6j54j55N8K01M0j03j4j4lmlmk2k3k2k3K3K3o8P7N1r2j46R4J43jo4o3o3Q1R0n3j05
1219b49L9O9O9K2K2K2K1LKn9o1qJ34Q5j54j77O4J62J8p1p2rJ34J35j05j82N7O1j80nK34Pj36
1217a08M6M6k28J1K89N1k44nJ42kp1p1j60j7J59J59r7r6J52J50o5o3L3L4l7l7O9P0r8r7J0
1215g5J0j10j10J44J43p2p2M7M8J09J11p5k17o0Q4J14k9j50nJ38oj26J8J06l7l8J07J40ll3
1213A01l3r9j01O8O7N9N9j47j49L5J78k8j71Q3K26K3k17o1J78jj45pJ35l2j74J06K49j09k53
1211a60MJ48o3o2R7R5p0p1L7L8j73k8K02N8k11o8K82M3k15p1J51PK4K4j19j19J02K45L1j14
1209D4j5j4m9R3R4n0m4m4J0J0Q4o0r8r9M9M8M7M8k3k3k3k3O2O4j04j04R2R1l7l6O6p7j46R3
1207g4K14k5r2r0J5J6J5J5LLMLn8o0O1N9l3l4L8L7j14j16J49J48q7q8Q0P8n6n6L9j04j50R1
1205a69J94N2n9n9R9J00n1n1n1n0L1K9L0L0r0r1j9J25J32j08j78O0J56J4j1j1%j%%K6K6r4
1203A1r4P7P6m3m2nnnnK9K7K8K8n7n5J5J6J49J51j62j60L1L3L3L3k3k3k3k3K4K3K3K3l2l3
1201D0l2l1llO8P0n5n5JKJ66p5j39MJ5J6J44J44k07k05K00K01o7o7m3j87r0J49J48r1qJ36
1199A46q0q0O8O8n2n2M8M7j12j11O7K10nj50RQjjJ06J06j11j10K4K5o6P9L0j13l3J10O5O5
1197B04m7m6p5p4m5R9J16k9l4J10J6k24q9N5L2L1M1M1J3J2MML9j04m7R6Q9j52p9J60J3j30
1195@Q5Q5r1r0J19k5j12K9R1j48l2K08J21j18m7m7J1J0j8j8j8j8K3K3R6R6n3n2n3n2n4n4J13
1193A0J14q7q7Q0Q0p5p5N3N3kJ41J68j19k15P4N6q8q8N5l4l3J4J2J4J4k6k4M5M7q8q9Q0P8
1191E8L6L7L6L6n5n5n5n5MLMLK5K6K6K5p5p5mmO9P0P0O9j4j5noo8P5J03j86j26J61Q9j98o8
1189c9K19Jj43K2K3J3J4l2l1l2l0j9j9N3N2N2N1k0k1K5K5j44j42J75J76j36j35M2M2M3M3p6
1187E2p5lmO1O3rj0o6o6N4N2R0Q9J8J7l6l7l6l7N3N3N3N2j54j54J09J10M4M5k8k7m3m2K9K9
1185B46m7m7J22J21j85j85Q5K29m6j89K0K1k1k1J00R9p8p8m1m2O0N9o0o1m8m6K4K3J18J17
1183B49llm8m8O3O2m5j89l1J14m9j92l7K02J06j34k7J14m1m1M1M0KKM7M7r4N0R5m9l1J13J7
1181C02l19o6K69Q4j56oJ38p8p8J35J36j28j29M1M2M1M1p7p6R1R2l0k9o5o6R3R4q1k24O8K12
1179B71lj48PJ50L1j13r8M6J18k5j39NJ02j39j17J20J25j9n2n2R8R8rj52q1O4N2N3O1O2r7
1177B19r7P1P1K5K4j2j2q0q0M0J84N7j83m8R6m5m5L6L6p4p4OPk1J22J76o3j31j32P0P0l8l8
1175A37L4L3k7k6k7k7ppO6O5l5l5JJM3M2p7p8J59J60rrl3l3L9L9p4p5M6M5O0O0j56j57N9N9
1173B56K2K3NOl1l1jkl7l7M3M4J15J16j40j40P6P6k5k6M6M6j14j13J02J02l2l3l2l3L4L3L4
1171C52L3m5m5rj0K3K2M6r7k5K15J97j39k09o5KJJ6J6Q9Q8k6k6r8r7O5O6opM1M0M1M0j00j01
1169B88O7O8popoMMMMk8k9j9k0p9O5K47Qk19p4J35ql6J09K7j17L0K9r9j00J09J09j1j1j6j7
1167C98j6j6OOOOM1M0M0M0q6q6L4L4L2L1m0m0j5j5N8N7j4j5j4j4m0m0m0m0M7M8M7M7NNNOk0
1164D88j9k0j9LLLLM0M1q0q0J12J11L9L9j09j08O0q4j35J04K64K4o4o4M1M1n6n7n6n7J40J39
1162F87k9k9J5J4j05j05R0R1J9J9K4K5j43j43J43J43j69j69J05J04j12j12J66J65n0n1l1l1
1160E31l1l1J55J55k05k05J06J05j4j4P7P7j39j39l9m0J76J76q1q2rrk7k8M5M5M3M4k8k9L
1159E88Lo9o8K8K8K8K8k5k4M7M8K1K2r8r9L6L5L5L5L4L3l8l9m3m2P7P7l5l5L7L7p7p8M3M3
1156E93R7R6j20j19rrqrK1K1K1K1N3N4o6o6K3K2m9m9M6M7k6k5JJP3P2n7n8O2O3o4o4L2j12
1154E09k0K20J05j34q6J55K2j21n6Q9kkK8K8K7K8k6k6k2k2k8M3R3n1q1O3O3q1l5J10j1j55
1152F24rJ35J5j29j2J33l8j09R3R4j28j27J18J18n0m9M1M2M1M2p8p8R0R0mnrrRo3j13L1J95
1150I01N1j71j71Q6Q7l3l3M0M0J8n4J1J54M6j95q3O2L3L3M1l1q7N7J26j14j25J14J78j58r8
1148G25J43P1p2j7N5LLQQLLLLN5N6o7OR0n4q1j0L9L9J33j0k27q3J37O4n5J8j0j53K2J66r8
1146I16k42J61L05j02k47n8Q6J4J58J65j71k43R3K26Q1j29j29j2j2R9R9m7j90l2J13J06l9
1145I69N2N2j35j36J28J29r7r7J20J19o6o7NOO0O0j8j62j6J28J18k5J0J0j67j67J46J47N9
1143A165q4p7p6L5L4L4L3L3L3o0o1J07J08p1p1JJl9l8J29J30J0Ro2o3n6n5O4O4m0m1P9Q0o3
1141A192o2J0J0k2k2M1M2M1j04k2k2J6J5J5J6OOOOj19j20Q7Q7P7o8j40MQ0P9q0p9J00J01k6
1139A151j69K1J65J56J2j11j12M7M8J1J2J1J1m7m8K5K5K9K9m3m3J13J12j3j58o8P7P6o7j9
1137A233J26J17k7j12j11M8M7o1o1J06J07l9l9l9l9P0O9j40LJ46Kk8k8nnJ16J15j16j16O2
1135A401O1j14L0J72o9j55Q4J35qp0p1Q0Q0Q2o3j35J0K4K5J23k0j24K0R8R8oop8p8J4J5J5
1133A570J5QQQQk2k2N9N9j41MJ80L6j12L1O2O2j7j7j07L7J10l4j53j0J24k0r8r8O2O3j0rO3
1131A699O4O4O3p4p5r2N1O1q3q3O1P5p0K0K1nnnnm5m5K6K7j9j9j8j9QQo3o4RJ0J0RQ1Q0j36
1129A522j36J1J1o1o0M7M7J19J19%jp2p3L3L2l9l9J03J04o4o4O7O8j48j48J04J04j11j12P4
1127A437P4LKK9K9m4m3j1j2j2j1J8J9n4n4m3m3P7P7o2o2N8N8K8K9m4m4R4R3p4p4J%j19j19
1125A201J04J03L2L2POOPM7M8l4l4J3j31j94M6J29j4rJ36O8p6p6O8oj49m1J98J63p7m8m7j3
1123A465j3j2j3J11J12j04j04O3O4n7n6QQQQq2q1Q6Q7L8L9L8L9r5r5k3k3n8n9J57J57JJJJ
1121A617q0q1Q8Q8n0n0n0n0J29J29q8q7O9P0n1n1J21J20j44j43J24J24r2r2N4N4j8j9j5j6
1119A610j6j5R0R1k9k9r9r8J17J18k6k7M6M5q2q2L7L8l0l0k9l0N3N3k0j9J1J1Q3Q3j5j5j5
1117A780j5p1p0J45J46j23j23llP8P8j38j38J56J57j08j08N8N9N8N9p2p2M8J92O2j77j14L0
1115A771k3k4J06J06o9o8o9o8R9R9K7K8MNK2j21m4J00Q1j58j04M0J6J6N6N6j5j6M0M0L1L0
1113A994j0j54n0J91O0q4o0o0l4l5L7L8LLLLR9J00k0k1qqj8j7Rj35K4J68J6j29m8R6LLJ2J2
1111A983j7j8rrnJ40O7p6j14j14M5M5mmj4J31Q5Q4p4p5MNMNM4M5p5p5J16J17j48j48O0O1n0
1109B012n1j0J33J87n2j09j08L6L6M8r6r3J48J89n1k13K7J72K8m4m4m4m5P6P6j13j12N5N5
1107B093Q5Q6q3q3O8O8n2n1K7K8K8K7J21J20r6r6L1L0m2m2k5k6k6k6KJJJN4N4j9j8L1L2n0
1105B253n0J05m0l6K04J27j13m4J00l2l2M8M9r5r6K5K5NNNNn4n4J9J8K0K0r9j00J27J27m2
1103B400m1J5J4J5J5l5l5Q5Q5P3P3m7m6NONOo2o2J53J54o8o8o9o8l9l9Q1Q1K1K1K1K1m6m5
1101B580P4P4J1J2o1o1K1K1K1K1j0j1j30j31J60J60qqo5o5q9J51J12l2n6n6M6M7M6M6l5l5
1099B750l5l5J4J5J5J4L4L4j34j34J20J20m9m8K0K0R2R2J3J4n8n8J10J09j0j1ppqpJ5J6J6
1097C032J6j43j43J20J21l5l5Q5Q5p0p0N0N1j8j8j9j8K9K8r2r1J11J11n8n7O2O1n8n9K0K0
1095C018K0K0jkjjrj0O2O3k5k5k5k4O4O5pj51o2J79J85n5j65P5J47r2j64P7Q9n6r7M7K9K9
1093C197P0O9n0n1J8J9J8J9M5M6j23j22O6O6O6O6m2m2n1n1J82L7k47qK74L3j83N7J99m2n3
1091C482R1J38pq5q4l8l8l8l8K0J9P6P6J09j30j46R4J16j23j17J22R7m7M9M8l6l7L5L5l5l5
1089C573k7k6%J45J45%o5o6PPNJ49J40j00j58j4N8N8qrO4O4o9p0KLN8N8P6o9q7N7N6q7p3P2
1087C869J35j0OOmlnnk3J21J08l6j14j14NMNMO3O3n8n7K4K3J5J4J03m2j22K1J65K2r0N4%j
1085D146jjN1r4J1J55R9j41j41R9J11l4l3J11O7j74j01J38J19k5q8q8L1J74J02m2p1p0pqK0
1083D315J9K0K0j7j6j7j6N1N0j2j2JJ45L5j10n5Q9p3p3O9P0lkN3N3l6J07Q4o1n1R2k1k2J07
1081D783J08j61j61k6J18K3K3m8m9J65K0j95n2J74J75q1q1ooJ14J15j30j29%%n6Q8J52q9m9
1079D739R5l1j75J18K62o0k03O5O6j11j11J18J19n0n0L7L8L7L7LLj08j08M6J90J32j07j05
1077D886L8m8m9L0J74l3j78k8J15K5K6J9K0p0P3J19k5r8M7Q7n8m0l9K8K8m4m4N6N7N6N7p3
1075E114p2R5R6K7K7K7K7q4q5L6L6J9J9J9J9lmlmK4K4K3K4j7j7N5N5J4J5J5J5K6K7K7K7l2
1073E611l1P9Q0L0j14r3J95K8k60MK91J03j85n6K31p7k22RK98P5k12j14L0M5M5N4N4p3p2M8
1071E801M8M4M5k8k7k0k1N2N2J3J2J2J3j1j0q2q2R2R2j24j24J13J14n5n5J47J48j16j17M1
1069E967M1n8Q6K34n5j84J04K07q0o3Q2N5r0j7J27M1j03k1J22J8J9K7K8l6l6P6P5M2j01j02
1067F405M2R0R1K7K7j5j6opq0O5J45Jn0R5P7j63l8J07o1o1J63J64j97j97J10J09j60P9J96
1066F942m5n7Q8L6j08l5J08J7j28n5Q8J28j7j75l2K11K11j01j01J33j1j79l5J47J46o1o1J0
1064G064RJ0J0P8P8r0r0J50J50K1K1N7q7q7N7N8N9nmm8m7K5K4K2K2J2J3J00m5n3R1P8o5PJ50
1062G745j4j58R9J00NNJ58J5n2n1o1o0N2N2k0k0J05J05o3o3O2O3j8j8J36qr5M9J51q9j70P0
1060H012L17K8j49nJ00m4l5J09kkPPN8N8j4j4N0N1K9j15m7K41P9o5L4L4K6K5L4L4o5Q0J15
1058H971j73j10J78J42j46j37J51J29j5j14j15o7K20J67j22j47J42J62J8N6N6k5k6kjkkR1
1056I279R1R1R1r3r3K7K7P4P3KKN4N5j17K7K33n5j36J52J55j34l4J09O6O6J35j53k34N5K23
1054A0038o6n6K32Ok81J03K47j9k0L3L2L3L3k7k7M5M5K3K2K3K3l1l0l0l1J86J86p8p9J51J50
1052A0836j7j8K6K6K6K6J10J11L8L8NNNNK44K44o8o9M6M6k7k6M4M3M4M4m3m3m4m3O2O2j8j9
1050A1701R6m7k30RJ84L9j13L1o3o2J14J15poO5O6J7J8J7J7O8O7O7O8L7L7L8L7M7M8M7M8r1
1048A2479r0K3K64J38j01j04M0R2R2J01J02r7r6J20J19j01j01J16J15RJ0Q1Q2j06j06O2O2
1047A3205R7R6R7R7j41j40P5P6j1j1Q5n8j15J26J35rO6O7J29J30L5L5L4L5N9N9J79J79o6o6
1045A4479J99J98q0q0J36J36L1L1L1L1N9N8N9N9RRRRJ80J80l6l6N8N7N7N7j9j8J01J01P5P4
1043A6214KLM6M5M6M6m9m8J19J20L1L2J03J04k2k3N0M9K2K2R4R4J06J06o3o2J87J87J9J9J27
1041A7726J26m1m1J25J26m3m2J79J79J2J1opJ14J13K4K3R6R5J05J04j5j5R7R7R7R7N8N8J30
1039A9582J30lmJ17J16j0j0J59J58J7J7J37J38K9K9m4m3R2R2J64J64j36j37J75J75OOK7J70
1037B1313J83j05k5J20L7j07O1K05J75L1M9M8M8M7M7M7R6R6k4k4J84J84k5J18J65K1R3K37
1036B3295M4r9j8J26J28J28K90J47M2M3J06J05J11J11J11J11Q2Q3J54J55qqJ22J21j2J32K13
1034B5815O8QJ53J43jJ49J49J25J25J58q2j63P7K59J15M2M3L5L6J55J56K00K01o4o4J81J81
1032B8200N2N2K73J30r5M9J97N4j8J25J60J7K5J69M1M2J71J70J40J39J48J48K7J72J80L7L3
1031C0838J77J60J59K30K29J10J09K63K63M6M7K09K10J38J37J29J29K48K49J93J93J21J22
1029C4709K32K32J60J6J51L90K65J20P5K20K49K50J38J38P5P4Q4K27K72J28l6J07J86J86L6
1028C8684L6J08J09mmQ3K27R3R2K69K69l5l5L24L25O4O3J60J6J01L41L47J07J65M05L00J56
1026D2766J96J96J16J15J99J98J27J26K74K74L45L46J57J56K20K19L14J69J73M12N02K63J96
1025D8059M37M73L29L45L44L71K28J97J97J38K81L20L21L14L14L23J80K88K88J59J59K38K39
1023E4542L58L59L33L33L33L33K06K07L69K25J84L28L28J84K93M37K76K75L24L23J62L06M50
1022F1468L05R9K43L53L53L81K36K04L49L72J32J77M17L39J00K28L73K77K77L22L22L94L94
1020F8115L70L70M90M90L48L47L48L48L13L12N77N76M86M86M50M50L90L91M62M63L97L98M78
1019G7855M78L99N43O12L72L83O24M97K58M17N61L88K43N19O62N37N36O68O68M52N96O25L85
1018H9278M39N83N96M53N43N42O21O20O21O21P61P62N45N46P67P67N03N03R92R92O32O32R03
1016A04222R04P35Q80J026P87O81Q26Q77Q77J006J007Q99Q99J067J211R54P13Q94Q94Q00Q00
1015A22959J016J016R01R02J070J069R38R39R02R02R53R52J169J169J050J051J213J453J293
1014A42917J052J281J425J190J047J257J256J080J080J214J215J351J591J465J322J547J547
1013A64837J538J539J657J656J546J546J689J832J851J563J559J704J821J820J885J884K092
1012A94019K092K267K123K144K432K554K265K274K563K536K393K498K786K728K729K914K915
1011B36232K980K980L197L196L189L189L216L072L308L595L506L361L532L532L451L450L597
1010B92583L596L668L669L723L724M162M450M210M210M732M732M516M516M876M876M680M681
1009C65604M849M849N024N025N201N202N395N539N608N896O396O397O270O559O983P271P262
1008D65330P407P680P681P915P915Q164Q308Q491Q779Q951R239R644R789R968J0448J0980
1007F06689J1460J1833J2313J2530J3009J3565J4045J4309J4789J5386J5865J6310J6982J7519
1006H06604J8000J8659J9332J9993K0665K1470K2142K2850K3714K4663K5526K6641K7889K9053
1005A127201L0302L1715L3155L4716L6540L8577M0592M2910M5694M8412N1198N4030N7199
1004A672241O0286O3071O6060O9613P3438P7184Q1564Q6654R2140R7997J04646J11656J19204
1003B775754J27749J37364J47830J59468J72815J87542K03771K22306K43144K66478K92884
1003D937105L22545L54714L88670M21413M49531M70945M83428M84101M75461M63651M48994
1002I700558M29310M09229L92616L72488L42623L05629K59826J97806J23771N0982j7676q3319
1001A2483843j35652j67582j89762k09701k20549k21958k25511k34188k39471k42158k49553
1001A0147758k59455k65506k70176k77379k83068k84893k88294k95112l00621l05519l14634
1000G003101l25486l31931l36252l42003l43634l37020l27322l17618l02734k82472k62788
999C493841k43652k20704j95628j71334j44373j12396p7852m0883J320M9045J00393J56183
998B593960K18218K85531L52255M11311M57994M89587N03546N03834N00342M97940M94087
998G308605M91880M96863N02913M97367M75570M33572L62417K67017J68017P8428L60n7627
997A1025382q9026j05024j17987j25860j27301j31581j42623j53485j62609j73885j84736
996I511265j90485j93270j97006k00177k01688k05433k12760k20731k28462k38735k50321
996G172197k58290k62263k65239k65516k60234k52553k46119k38918k29220k20482k13663
995D459700k05922j96992j88794j79862j68488j55716j42933j29586j16133j04514r4852q6690
994B689218p9836p4364o9970o6033o2285n8732n5624n3031n0300m7900m5991m4166m2352m0526
993A898108l8919l7285l5564l3931l2611l1362k9944k8694k7723k6858k5930k5257k4610k3937
993A475483k3280k2800k2139k1660k1111k0630j9982j9503j9247j8767j8094j7807j7390j6717
992A196356j6322j6033j5481j5001j4701j4413j4012j3723j3459j3172j2811j2523j2082j1938
991A000685j1717j1430j1108j1108j0955j0667j0653j0652j0293j0149j0088r801r501r645
990H52918r426q945q794r083q704q224q239q238p915p627p657p656p624p335p106o962p016
989G16367p016o787o644o509o221o075n787n619n619n411n412n243n244n403n402n331n330
988F17314n466n465n202n202n206n206n188n188n340n053m915n202n258m970m935m934m824
987E29760m825m704m705m715m715m715m715m713m713m593m593m414m415m198m198m176m176
986D52477m257m257l932m077m326m038l936l936l833l546l516l804l633l488l642l642l369
985C87245l368l168l168k954k811k792l080l080k935k887l174l238k949k928k927k910k909
984C35967k634k634k633k634k581k581k518k518k592k735k562k273k265k409k216j929k146
983B94107k290k191k191k260k261k189k189k099k098j883j883j730j730j731j730j980j979
982B59693j962j961k218j931j696j984j869j580j608j752j583j584j722j722j526j671j697
981B29627j410j309j597j525j237j469j758j730j587j690j690j681j681j501j501j380j381
980B03500j345j344j344j345j496j495j376j376j431j432j158j158j190j046r47j235j340
979A81442j053j070j215j165j021j093j237j097r52r71r71r26r25j142j142q94q94r65r66
977A61743j061j060q44q45q68q68q69q68r69r69q49q49p98p98r66r66q24q24q96q95p80p79
976A42298p80p79q80q80r52r52p57p57q29q29p50p49p50p49q94q93p73p73q24q24p05p04o37
975A23878o38o38o38n28n28o96o97n56n56p25p24n28n28n28n28n95n96n24n24n64n65n64n64
973A10346m78m78m78m79k86k86n02l58j56l97o07m63l64n08o28m84l92n37m65l20l62n05n11
972A00302l67l96o35o59o59n84n85n12n12n36n36n36n35n75n75o47o47n64n64n64n64m32m33
971H7685m32m32m90m91m19m18m46m45m37m37m42k97l55m99m93k53k53m93m99l56l32l31j65
969G8470j66l81l81j72j73l35j90q3k26l47k03k49l94l13j69k57k58k48k49k32k33l11m55
968G2445m17k74l54m98l10l10l91l90k92k92l64l63m41m41l69l69m46m45l25l26l24l24l25
966F4055l24l24l24l25l24k25k24l45l45k50k50l71l70k25k24k97k97l48l47k76k76j50j50
965E7464k70k70k05k06k05k06k42k42l63l62j51j50k71k71j46j47k66k66j21j21l46l45j57
964E2135l01l70j30o0l01l73j33o3l04k43j00k17l62k33q9j96j97k59k59j78j78k51k50j66
962D6922j66k86k86j77j77j76j77l08l08j40j40k46k47j26j27k02k02k74k74k11k12j39j39
961D2182j88j89k60k60j91j92j19j19k40k40j68j68j90j91j90j90j13j13k80j37ok47m14j74
959C7603P6o7j88j87j70j69k42k41M5M5k19k20j11j11k31k31j39j40o7o8j75j76j75j76r3
958C4173r2r3r3q6q7k55k54q2q1j54j54j01j01j01j01j84j83j12j11j70j71j70j70r0q9r0
956C0798r0j90j91j90j91j51j52l2l1k44k43k7k7k14k14KLj36j36k08k08n3n4k22k21o6o5
954B7247j38j38r8r8K2K1j88j88o8o9N0M9j19j19j14j15j14j14R1R2j24j24rrj77j77r7r6
953B5079K3K3k14k14N0N0j83j83o4o3r5r4k3k3j29j28j29j29j56j56l6l6j05j04j05j05j3
951B2738j4j81j82noj74j74r0r0r0q9j45j45j28j27j58J29P6k13k73J5p6k19j08L6o4o3j08
949B0072k52j35J54O3k25j26J8m6m6j10j09q1q1rrn3n4j74j74l7l7l7l7l8l7L5L5k52k52J2
948A7978J3j65j65MLj25j26n4n3K4K3j44j44l8l8l8l8q5q6o4Q0J7k72j12J76P4k13j95R3o3
946A6267o4m5m5n2n3j24j24k9k8k8k9j3j3j84l9J40j48k20O8qj51n2n3j28j29rro2o2J0J0
944A4594n2n1n2n1j12j12QQn4n5n5n5j02j03l1l1k4k5k5k5j21j20M7M7j32j31M6M5j53rK22
942A3336j8k40r6P1P2j00r9K0K0r7r7k5k5j40j41K8K8j02j01O7O6l1l1j04j03L2L2m1m0r3
940A2048r2K7K7LLj64j65M2M1j26j26M6M6M7M6j40j40o8o9k1k2N1N0j78j78J35J34j42j41
938A0974K6K6r1r1K9K9j27j28M1M1KJp0p0o0o0o0o0nmp7p7m8m9K4K4J0Rj10j10o1o1J1J1q
936I831rrqJ8J8nj50j24J16J16j24j8J27n7k01l2l3j13j14j8j7J41J42l6j80k7k7p9p8LLn2
934I004R1j3j58l1K08Q9j52j93n0K3K3L0L0m1m2n3n2n2n2J21J22m6m6k9k9k9k9r3r3P4P5r7
932H510r7rj0j30J11J25j15j67P3Mj40P0P0k03k03J16J16j39j39n0R4J02m1k10o6J02m2j36
931G596PQj37p1P3O4q1M6M6Pj37j63j9J08J07q3q3q3q3J00J00p7p7Q5n9o8P6j0j54P1K15j36
929G188j36J37pk27J4Q6k50k63J68J59q0rqj92j91J41J42j71k6J04j36k47pP5P6p8p7k7k6
927F132k7k6O6O7n4n3ononK3K3n0m9L4L4l8l8L8L8l3l4J6J7J6J6opooo6o7o6o7kjkkn5n5J6
924E704J7p7p8n7Q8O3k26j53J35R7m7j49nn0n0m1m1K8K8J8J9p6k20n4K33R5j93r4N0j11j11
922D742O6O6q4q4q4q4j7j7N6N5OOj14j14pqJ13J13j06j07O2O2j29j29L8L9l8l7l8l8L4L4j34
920D123j34J18J18j07j07K8j16k15P3K99J2k92lJ01m3j06L9N1r2o2K25J71j17j72k7J22k1
919C866mln9n9Q5Q5j40j40J01J00k5k5r6r7L9L8l4l3J23J24j17j16O5O5p9p9J6J7q3O2J99
917C796q9k38r5N3N4O2O2j33j33J1J2j05j05J35J35q6q6N9N8j09j10l7l8o3o3Q1Q1j96j96
915B717J40J39k9l0lj46j95R3K38n1j17K8R0n4m8R6Q7n7l3l3j14j14J18J19j25K0K01q7k31
913B619N7J86M3klj4j5nnl8J06O2k27l4K53J00j87n6Q9L5J79J11j77k57L0J68j20k0J23l1
912B970l2k2k2P7P6o7o7M1M0j03j03qpppO9O9O9P0p1p1j34j34R1K36N8j82l0J13n4n4o8o8
909B668J72J72j88j88J48J48n3n3M3j01j36J04M1j03O9P0q4q3P7P6NNn4n4n4n4J6J5J6J5k3
908B632k4k3k3P2P2p2p2POOOp4p4J66J66q9q9N5N5rrj53j53Q4Q5o0o0L0L1L1L1r4r4N1N0P
905B471Qo5o5L0L0L0L0K5K4j19j20O4O4q1q0P1P1p3p3N3N3r1r0Q9R0n5n4K2K1K2K2n7n8J4
903B223J4m8m7K4K5O0O0j07j08M5M5k7k7L3L2N0r4r2N2N2r3p6O7N0M9j0j1j00M3J31j3m3m3
901B116k7k7k6k7o0o1L0j15nJ39N9q6JKqqK7K7o3Q1P9o5K6K5j13j13PPl4l4L8L8NNNNM2M2
899A934L3L3q7k31o9J71M8M7%jj31J4K8j16PK47j7k57l5J09kkJ81n9k76l5M6M6O1O1r4r4L6
897A596L5nJ39J48j89k38R8J58q2j67P2P6o9PPjkLKLLppppn8n8J4J4M8M9j11j10l7J07J70
895A594p0j22K3kjO3O3j05j05J25J26j39j38J71J70j41j42L5L4k9k8RJ53M8j93p7O7N1r2M1
893A389M1q7q8J24J24r2r1L1L1m1m1O2O1j55j55J26J26r1r0K0K0K0K0J4J4J4J4r1r1K9K9N1
891A247N2j17j16N4N5j7j8NONNn0m9J18J19j45j44J68J68j38j37j8j8R1R0p8p8N1N1k1k1J
889A121KJKn2n2J16J17r3r2K8K8o7o6N4N3opO6O6j24j24M5M4M1M2j27j26R3R3k7k7K0J9K0
887A081K0K8K9m0j84j68J21J17J18oop8p8l5l4l5l4m3m3J25J25p8p7J41kk64K5K02q7j82J05
885G63J27j8m8m8O2O3l2l1l2l2M9N0k3k3L3L3q7q8J02J02o7o6M6M7p4p4PPOPnnnoK2K1n1n1
883F81L6L6L7L6l8l8L3L4opopj9j9j9j9jjp3p3O4O4j8j7P9o5m4K44N0k38K9J74j33j33M4M5
881G12j13j12J52J52m0m0m0m0k6k6k6k5M2M1p8p8N0N0N0N0q0q1qqm6m5P5P5O9O8llj03j04
878D61J52J52j07k50pK33J29j11j62j7j4j3O8O8%%J%L0L0q9r0l2l1l2l1L9L8L9L9J8J8J8J8
876E65o3o3N7N7l2l1M0M1j1j0j1j0n4n3n3n4O4O4n6n7M6M5k7k7K1K1lJ41O4j76j04J36P1p3
874D65n7Q6M1M1j18j18lkO9O9K9K9m3m3J8J9J8J9j65j64J00J00J1J1j09j09J24J23LMO5O4
872E77n5n5lmr3N0K7j16RRJ2J2Q4Q4p5p5lmJ%k6k7p1P2Q2o3q4N9J49r0j92m8J20J20k5k5M7
870C80M7j%o3o4n7Q7J24k1p0p0L2L3R4n0j30J3J83L9q1O3R6m7l9J06K9K9p3p2k0J25J16j25
868F13j50nJ8J8L1L0K2K1N6q8k5J20P9o4m6m7M7M7p4p3J01J01o7o7l4l4l4l3N2N2l8J06J8
866F53j26n4R1O6p7k3k4j9k0J34j1p3p3L8L8rj0m5m5L7L6l5l5L8L7L8L8n4n4K7K8j16K9K9
864D54K9L4J79J9j25m3J00j09j10M8M9k4k3R9J00o9o8M7M7k5k5Q9Q9p9p9O3O4j05j04J8J8
862E58j8j8K3K3J04m0n6n5o5o4M6M7l4l4J21k3o8P6N0r4j3J31mnK2j21o0Q5J3j32P8K22j32
860E63j32N5N6p0P4K6j17KJ47m2j86K4K4N5N4j8j62q4J56K1j23Q1Q2K8K7m9j94O1K06o3k06
858B96J00R9j4j4J0j34j02J37Lj42M9M9L1L1R0n5m5m6n4n5O6O5k9k9k9k9N3N3k0j9J08J09
856E33k04k04P9P9QPLLKLn2n3J16J16j11j11RRK9K9m4m3N0M9k2k2k9k8M4M3MLLLq1q0OOp6
854G6J63J73o7j29J5Rj35M0J83m2j86R7R6l2l3k6k6M5M6l5l5J33J33k12k12J00J00m5m4K7
852A77K7p0p0KKK1K1K1K2m3m4P7P7r9j00J65J64j62j63ONO6O5n5n5n7n7J09J10K1K0n1n2M
850A04NMMk9k9M3M4j7j7q8q8K3K3K2K3O9P0r0q8K5J70l1l1j2j2r2N1LKQ3Q4m0m0N0r3j55j1
848f1O6O6nnj4j5R7m8j28J6Jj42P4K17K8j17J3J57n5n5m6m4N3N5n6n5l9J05K5K5k6k5jj44
846h3j41R9J70o7j41LJ14J14J2j31o9P6R0n2q2q3O6O6J46Lj35j35K4K4J3J4J3J3M8M6L9L8
844A12L5j08k8k6OOR5m8j04L9J50Oj91j91K2J66J14k9k8J14J9j24k5k5j30J3J90M7j11L2J4
842A2J4K4K3j43j45O1O0j1j1N1N2k1k0o8o9J00R9J1J2J1J1j04j06O2O2k3k3M9M8r6r6J20J19
840F5k9k9k8k8Q2Q4j32j33K1K0K0K1K9L0m3m2L9L8l3l4j5j4j5j5Q5Q3l5l6l4l4l4l5J06J04
838B9o2o2M5M5p5p4J4J3J4J4K7K7m5m5jkP1P0j04j04J6J6l2l2M0L9L8L8l5l4o7o8J01J01r1
836a75r0J73J73j83j84Q1Q0N6N5j6j60p7J64J00m3l5l6m4m4O4O4rqn1n2O9O8j1j1j1j1M8M8
834hp1p2J13J11j50j51K6K7R8R7p1p3M7M8N6N7j5j58j29J11J28j5m3R8o2o3rrqrJ8J8J8J9
831b6m2m2m2m2K2K2K2K1N5N4j6j8P1P2m8m8r5r6K4K4Q4Q2l6l6j7j7j7j7k9k9N2N2p4P0J31
829G1j06j38OP7P8K7K8m3m4K6K5m6m6L1L0n1n0N8q5j49R2J33j0p7O8P5o8K1K2m6m6P3P3k8
827a9k9j01j01J83J82j29j29P2P1P1P2pqpqk2k2k1k2K8K7K8K8j14j12OJ49J31j09m3J97qk47
825a3k5K13R0n4M1M2r3r4K6K7j1j1j1j1L8L9n7Q6J64p7j34J0LLJ1J2k6k6k6k5J4J5%%J40r9
823A81j85N2J60q0j93M6J75L3m0m0J0J0J0J0m9m9K4K3M7M8p3p3J8J7J7J8j9j9j9j8q6q6L4
821i6L3K6K6K5K6n1n2O6O8m3m3m3m4J10J11L9L9m9n0K3K2m1m0m1l9L5L7L6L6J07J07j3j57
819A70n1J89J27j8r9r8l6J08J49r1r8J43J34j06j10L5O0O0O9O9o7o6OOJ7J8J7J8K1K2K2K2
817F42qqqqqqrqMMNMj7j7j37j37J26J27m2m2o4o4o4o5P4P4m7m6R9R9k1k0j29j28L9M0M2M3
815C17p8p7M2M3k9l0O4O3n6n6m0l9J29J29j11j11RQL2L2m0m0j1j0j0j0K1K0K1K1k4k4M8M8
813B51nnp6p7R9R8K7K7j7j6j7j6J16J15n2n3M2M1M1M1m1m2J27J26l2l3L9L9k6k7M5M5mnO7
811H42O7JJKJk4k4k4k4J8J8J8J8l2l2j22K2N4r0r1N4K00N6j66j66J18J18r8r9K7K6m5m5M4
808F23M5k8k7m4m3K8K9K1K1Q4Q4J2j32j32J2R6R6j5j5p0p1o1o1j7J28N5q8k4k3j23K2J29j4
806D97k22p7N2N2k9J16l4j77rJ34J14l0o0o0rrO3O3n1n2o1Q3K1K0K9K9K3K3K3K3L9M0J5j28
804D51n8J84J29j5n7Q7llL2L1q8q8P4P4j03j03J50Oo9J71K15j22j81N8P9o6J03J02o3o2J14
803I79J15j53rP2p2n9Q6mnN4N4o6o6l4l5L8L8n9n8J12l1k33N6R4m9q6N7o2k06K3J67m3m3K3
800E95K3K3K3k2k3r4r4JKJKJ02J01o6o6P5P5m5m5j11j11J53J53j29j28qqJ02J01o6o7j3j4
798D22j3j3M6M7n2R2J75j13j04M0J32j3r0r0P7P8m3m2J2J1Q4Q4m4m3P7P7p9p9M1M1m8m8K5
796F47K4J2J3Q4Q5p8p7M3M2K2K2K1K2j8j8j8j9N4N4j17K7J92r7k25O2J11j78j05J82J42j47
795G64j20K4m0m0N0N0n0R5J04m1q6N7J20k4j34j34J69J69r5r5K5K5L1L2q8q8Q0Q0j36j36J09
793F77J10o8o7J09l4j04J37J05j34o6P9%JQ2Q1j58j58J0J54J21j19j28J6k8k8J01J02q8q8
791F17J28J28k6k6J35qj64k1N8N8M6M6k6k6nnnnPOPOl3l4L8L8K1K1o9P6L6j08j62P8J29j4
789I42RRLLLMm4m4K9K8K1K1n1n1O4O3m7m7k1J24N2r2r4r2J14J14oop8p8J63J63j1j55j55j0
786H47N8N8Q6n8r7r7J13J13n6n5K1K1r1r0k9J16N2r2m4J01R1n3k1k1k2k1l0J15J14l0ooon
784I76n9Q5R4n0j44jJ59J5j1j0k0j9l6l6L6L6L4L4l7l8Q5Q6J3J3J8J8n4n5%%RRn6Q9R8m6j89
782A046m5Q2Q1M4M4M4M5J8J9r2r3n2R2K9j15p7O6k4k3L3L3j35RL14P4l41j00J85n4j26J14
780A095J09j30o2Q2j09j09J64J64n9n9J2J3j3j4p6p6l4J10J01J01M5M5o5o6j76l3J50J51j33
778A128j32J31J31q7q8j5j6k8k8R1R2l0l0l0k9k9k8R2R1q0q1Q7Q7o1o1N8N9o1o0J07J08j0
777A278rK6K7j01j00O8O8K5K5m7m7ppO6O5mmmnK3K3m9n0j5j6j5j6L0K9L0K9m0l9Q0Q0n6n6
774A285J5J6j07j07J08J09j3j4m9n0J4J5j06j06L0L0L0K9M5M5p5p5%%%%l5l5Q5Q6j06j06J10
772A068J10j9j9n5n5J3J3J4J3L1L1r7r8J11l4l0K10P7j63J7J61k9j74Q5Q4j3j4j3j3o3o3J53
770A239J53o8o8N2N1n0n0K2K2q4q4Q4Q4l3l3L9L9N6N6j6j5jjj%ppopK7K7rrL7L6l6l5L8L9
768A481l3l3L4L5l7l8MMM0M0m6m5P4P4NNo7o7K3K3j3j3P8P8NOn2n2K9K9j75l1J88j00j98R0
766A345K10p7k49L9P5P5O7O7j52qJ96r2k12P6J42jj19j18J00J01o7o8P6P6r2r3J18J18kkl8
764A491l7L4L5J36J36q0q0j3j3m8m9J05J06L3L3pqO5O5N4N5N4N4q9q9J75J75j23j24R3R2j07
762B124j07J2J3l5l6L7J81M3j97q2J57J04j35j03M1P4P4q6q5K7K8rrONONn3n4J8J8J58J58
760B298j0j54j07J33J42kmnm9m9O4O4O4O4r2r1k0j9l6l6J80J80j72j72M5M4qpK8K9j73j72
758A957R1R2O5O5n5n5M0M0q1q0K0K0K0K0n8n8J4J4JJP2P3o8o8N2N3j3j3j3j3P2P2L6L6p3p3
756B205%jM1M1l1l1K4K5K4K4o5o6J03J02j2j2O0N9JKK8K8M8r6j24J17J30j3p1P4Q3Q3k8k8
754B724j7j7J03J03r7r8O1O1L6j07r8J42J35qJ6J6k5k6J43J43j45j45J28J28l9J05J02j38
752C186p7J63J27j13j69P1J22k2LKO5O5m0l9lln1n0O9O9l8l9l8l9Q0Q0J4k26j70P0rqR7R7
750C246j20j19N6N5j60j61P4P3L8L7KKl4l4Q0Q1q7q8K0K0N6N6M0M0q0q0o8o8N2N2llL3L3l9
748C002l9L3L3r5r5k3k3J31J32q4q5M9M9N0M9o4o4M7M8P5o8j37J03J10j29o1Q4L7L7n9n9r8
746B886J43J51q8q8N7l9l9K8K8K7K8K8K7K8K8L6L6L6L6j5j5N7N7Q0Q1q7q8Q4Q4l7l6P5P4J47
744C810J47p9p8opk3k4r5r6K6K6m6m6q0q0q0q0J51J51j61j62J8J8J7J8J6J6J6J6J14J14J14
742C645J14J16J15K11O8j40J01K80M0j17K19J53j83q4K53Lj40J50J51k66j23K95N4k51j08
740D556J63J8j46j46M1J85Q6j54j18J22J07j33o6o6q0q1%%p2p2n3n4J8J8O2O2O1O2J36J36
738D592K08K08O8O9L32L33L4L4K50K50J30J30K50K50J38J39J9J9J54J53j10j10J%p1p1qrN5
737G437N5j02k47l3K55Q1k07j36J53K10p9r9M4l2l2R7R7o5o6o5o5Q6Q7q2q2J18J18m9n0L4
735G381L4L4L5M7M7M7M7P7P7NNJ20J20m8m8J02J02J02J02P6P7P7P7J4J4J34J34p6p5mlJ77
733I010J76l9l9P4P5J5L02K11p6n9Q5L8j05j5j6K5K6j43j43KKp1p0m1m2L0J75J33j06r8J43
731I459R6R6rrj03j03J8J7Q6Q6J5J4mlp5p6J00J01J00J00j9j9J01J01k2k3k2k2j9j9N3N3J7
729A0066J7n5n5P4P5P4P5k2k1k2k1J27J28QQJ41J41p5p4J7J8Q9R0nnO7O7oonoM5M6M5M5q7
727A0998q7Q1Q1p5p5J41J40ooooJ9K0j01j00J42J43j70j69J54J55L5L4k1k1N1N1jkP1P1Q5
725A1626Q5Q5Q6N8N8N9N8JJP4P3J90J91j7j7J5J60P8P9P1P1m9m9K1K1J42K85J31j09m6R8R1
723A3621R2K8K8J62J62M2M1J56J56j2j3N7N7P5o9p7O8J46J46M7M6K00N6J5J4O9O8J23k2l0
721A5452J13J68K3L3J77J16J17J01m2p0J71K36R3L3J76Q7Q6P9P9P9P9J30J31K02K02K45K44
719A8540L65L65K30K30M46N90M03J63L32N71M75L32M18N62M58M57M84L41J72L16K98N9J8J63
718B6788k1j64N7N8j83j82P0j70m28k83j49j49k21p7l7l8O2q3n7Q7O9j71j40Lr2r2m6m6J22
716B4487J23L7L8J09J09QPQ0P9M8M8J19J20J73J74N4N3k0k0N2N1J5J4K30K31P9P9P9P9O9O9
714B6873mlJ49J48P7P6M17M17J53J53J48J48J47J48J18J18J17J18K70K70J50OK62N01L24Q4
713C1385K93K94K78K78L87L86L87L86N00M99O68O67P54P53O81O81Q90Q91J010J011R38R39
711D4956R38R38O34O34P69N29J81J80L01O1j68j68j83j83l16l15l15l15j94j93j94j93r9r9
710D7186j00r9j92j93k5k5r1r1o6J73K21P7Q2K27J93M8K10K11l5l5L7L7q6q6K74K75J15J16
708D8358K36K35K89K88K88K88M03M02L96J09K46K46K28K29L24L25J56J57N69N69L54L53N57
707E5605N57M37M38N51N51N51N51M78M77M78M77M98M99O18O19N67N67O40O39P03P02Q23Q22
705F8848P56P56Q75Q76Q58Q58O89O90Q25Q25R44R45R72R72J091J092J130J129J009J010J080
704H8230J079J152J152R69R69R69R68Q00P99J033P46O13O14Q77Q78O26R13J112J112J061J060
703A07732J133J133J253J252J133J133J413J413J581J581J692J692J812J813J984J985K057
702A33792K056K248K247K247K248K599K600K750L038L061L060L325L612L838L837M198M486
701A85242M531M531M825N305N996O669P306P977Q808R481R823J0111J0210J0209J0456J1128
700C12608J1951J2814J3859J4723J6003J7251J8416K0048K2293K4885K7454L1006L5321L9833
699F18465M5307N2509O1658P3277Q8329J07821J32365J60885J88359K08620K19948K22925
698B180468K17824K08125K01099K00426K03752K09225K15838K17855K09886J89816J55711
697D410025J05684M7960l412m1732o8330q3143q7271q9619r8166j12701j27969j40747j48332
697C562247j49593j47768j46625j45377j43481j42617j43351j43832j44540j47325j50091
696A957647j49035j44234j37800j29551j18893j08018r8895r0884q2913p5688o9446o3559
695F88731n7701n2408m7511m1680l5055k8765k2715j7167j2846j0290q656p232n982n251m579
694C30893l942l078k406j734j237p57j81M91J131J995K798L279L774M639N430O487P771R212
693C64565J0616J2248J3655J4712J5504J6369J6827J7115J7824J9264K0825K2649K5062K7462
692F14697K9638L2231L5315L8868M2852M7941N3882O0701O8880P8195Q9009J02165J18113
692A412487J38182J63233J94057K31436K75512L19671L51840L67134L68959L60003L42625
691D525139L26338L20097L21994L27276L35488L40385L28226K93369K38351J61820O8627j8274
690G568836p8316j13558j33493j37815j30951j29508j41909j60825j78966j94235k02699k02556
689E764005j99972k00260j99992j97977j98906k02652k05244k08797k17607k26538k28109
689C477951k24942k20755k12401j98309j84386j73826j63168j51800j42487j34438j25124
688A546315j16290j09280j01553r1854q1328p0477n9135m8860m1095l5813l2026k9433k7249
687G01922k5232k3566k1933k0324j8885j7629j6574j5746j5073j4211j3347j2543j1679j0946
686D64234j0467r842q978q169p305o453n589m790l734k786k306j850r85r13j202p30J33O38
685C88906J118K199L062L603M467N685O742Q385J0403J2760J5544J8785K2338K6864L2720
684E63581M0103M9993O3396Q1160J04146J32090J60191J82373J96429K02862K01123J94306
684B171753J89925J91365J96460K04046K13685K20118K17415K04067J76989J33489Q0142L1074
683D230528o844l4403n1198n7633o1401p1100q5899j01359j14707j23445j25966j25487j25655
682C145431j25655j24593j24592j26454j27701j29145j32890j36701j36701j33325j28812
681A718862j22421j13490j04203r6425q9583q2958p6782p1308o5907o1010n6558n2044m6679
681F79494m1014l5507l0034k4776k0840j8463j7022j5462j4406j3689j2824j1913j1240j0658
680D01646r794r290r001q771q290q009q008p452o972o725o438n939n460n399n111m632m344
679B82011m543m542m506m218m116l828l544l256l041l040l084l083k628k628k706k706k706
678B23836k706k341k342k413k414k351k351k423k423k414k415k342k342k187k186j971j970
677A84245j818j817j650j649j769j769j505j504j362j363j242j242j017j017j018j017r27
676A60559r27r28r27q49q49m89m90l34l35j18j19Q0Q0j36j36j95j95k03k04o4k08k47K32O08
674A53606L20P7L65O24M79M25P13J069J213J375J375J342J485J874K161K512K992L653M516
673A82176N260N739O163O451O649O793P054P534Q108Q781R657J0522J1181J2046J3474J4914
672C22502J6559J8960K2009K5369K8934L3256L8645M5270N4028O6031Q1684J01752J27027
671I82026J55931J82782K02466K13605K16582K12093K04507K00498K02322K07460K14277K21121
671C415670K23137K15407J95530J60923J11278N5991P884k7941n2811o6436p1140p5713q6564
670D005215j01844j16536j28229j35047j36368j35695j35281j34418j33175j33174j34466
669B580982j35521j37652j41398j44071j42630j38609j33136j25153j15070j05408r7245q9654
668A075435q2451p6259p0400o4679n9397n4668m9579m3538l7488l1343k5486k0549j7189j4812
667D27597j2987j1779j0913j0026r162q495p822o983o310n722n242m390l718l245k573j804
667C16426j133o43M13K009L450M745O378P819Q874R472J0336J0801J0945J1441J2688J4132
666D28153J5957J7886J9710K1727K4127K6787K9571L3257L7961M3213M9262N6872O5611P5610
665I45704Q7998J03373J22290J46798J77621K14962K59230L04639L39496L57717L62422L56753
664C779003L42062L27670L23733L28234L35436L45170L52565L44582L14143K63057J89984
663G245639R9071J2362m9393q7132j09022j14878j09982j10463j23991j42908j61044j76697
663F171562j85797j86278j84957j86014j85869j84045j85353j89290j92234j96939k06505
662D088281k15051k17106k15473k12220k04250j91446j79251j69601j59518j49249j40704
661B034412j32841j24295j16604j10171j02717r3402q3312p3230o2619n2729m5293m0395l6783
660I60021l3806l1466k9833k8082k6256k4904k3655k2346k1291k0290j9233j8249j7385j6596
660F26629j5731j4916j4243j3398j2343j1429j0374r212q156p136o464n730n250n075n076
659D82096m968m295l726l245k456j784j183n11K24J088K084L717N534P550J0371J3732J7222
658E21450K1927K8228L6583M8188O3841Q4605J10628J38800J63669J81470J91361J93512J89383
657A973645J85278J86335J91852J99631K09545K18668K21546K14346J94624J58807J10374
656D064651O1115K0448j0568l1073m0579m5238n3398o7065q2524r6748j07022j11793j13040
655C387166j13875j14548j14211j14211j15489j17314j19588j23141j27211j29034j27652
655B070892j24482j19094j11315j03164r5961q9481q3238p7348p2067o7109o2597n8697n4567
654I51772m9827m4737l9270l3605k8587k4650k1838j9628j8176j7120j6226j5554j4977j4113
653E93464j3221j2356j1396j0724j0247r958r611r322q845q365q149p860p411o930o687o399
652D45983o215o071n854n711n686n687n662n375n013m868m746m746m595m308m302m301m312
651C58531m312m078m078m066l778l658l658l680l391l257l401l475l476l268l269l216l216
650B97254k952k952k969k968k819k530k605k605k587k587k520k519k352k351k394k393k225
649B52926k226j961j962k033k033k002k002j882j882j892j893j724j724j490j491j490j490
648B21749j650j649j649j649j495j495j327j327j332j331j020j019j185j184j353j352j314
647A98418j313j578j577j273j272j219j219j206j495j660j803j810j810j632j633j544j256
646A73118q81j025j141j142j150j150j345j345j225j225j163j164j164j163j093j093j021
645A53628j021j230j229j286j287j244j004j140j139j036j036j051j050q32j072j297j057
644A34617p30q74j123r80n99o00r51r51r17r18r18r18q23q23q95q96r25r26o61o61q36q35
642A15857p16p15p85p85o16o17p62p63n94n94n82n82n81n82n90n89n89n89o24o23o24o23m63
641A01269m63m63m62n52n52m79m80n96n97n96n97m71m71l51l51m86m86n58n57m66m66m66m66
640H9837m88m89m88m88n02n01n01n01m56m56n76n76l13l13l75l76m78l33l43n83n63m20m43
638G9275m44l85l85l85l85k47k46m62m63l92l92m64m64l11l11m31m31l36l37m56m57l89l89
637G0313l90l89j78j78m90m89l77l77k57k57m49m49k81k81l75l74k55k54l81l80k85m28l89
635F2350j50k03l47k18p4k03l47j79j78k59k60k26k26k27k26j61j61j62j61l38l38j22j22
634E7462l44l44j76l20l74j34j97l41k49k50k67k67q2k25m63k22r2l32m03j64j34l74l73j34
633E1201j28l67l67j28J1k29l44l43j73j74j01j01j77j76j76j76j68j68j67j68l25l26j09
631D6621j09q8q8q8q8j99j99j99j99k57k58j37j38j78j78k50k50p5p6k92k91j39j39k10k11
630D2285j16j15j88j87k64k64j44%j13l54l53j13K1j22l24j79j17j16j08j08k14k14j43j42
628C8308j96j97o1o2k61k1Jk40k72O5o7l07j61j8j85j86l7l8k05k06q8q9k08k09n8n8j31j30
626C4683k6k5k42k41k8k8k44k45j93j93p3p3k68k68j00r9k22k21n3n4j07j08j08j08j75j76
625C1005n5n5j91j90p0p1K9K9k36k35r4r3k14k13RJ0o2o2q1q0q1q1j57j58J07J07k51k50J3
623B8329J4j69j68m8m8o8o9o8o9q1q0j53j53j05j05j05j05k0j9j88j88j3j2q5q5J4J4j54j54
621B5859k06k06l8l8j07j07j07j07p8p8p8p8j08j08J2J2k71k70M2M2j26j26j26j26q1q1q1
620B3235q0O7O8j96j96m5m5m5m5r7r8r7r8k4k4k3k4j46j45j46j45O2O2j55j54m0m0m0m0j6
618B1290j5j35j36p5p6o6o6j06L8j3k53r1J49q8k32p1p2q0q1J9J8j49oOk34k34NO6p8p2P2
616A9234N1r4k13o9Q2o1j82l8J77L3j89j89K0J9K0J9j47j48O9O9q0q0JJj53qp2k15K4J69j44
614A7906k87M2J87j67j67L7L7j41j40p8k22j57Q4J14J14m6j89j75l0m9m9m4m4m4m4j34j34
612A6180J22J21j35k79J14J14j28j29m7m7j10L3p7k21P2K17j04k48O4O4o5o5l3l2L9M0j56
611A5304j55k7k6j28J6R8m7j26J8Qj35K4K4j53j54O5O4o5o4K6j17j90m5ONn7n8n3n4O7O6q2
609A4055q2j0j1l8l8k9k9k02n7J10l4j31j32k1k1J1J0J1J1j06j06j14K9P0P0q9q9q6q7n6Q8
607A2897Rj34n4R1nno8o8n2n1n2n1L5L5j33j33j3j3j3j3j6j6q8q8POo5o6L1L1m2m1n5n5n5
605A1697n5rrl5J08Q6k02n0R5n0j95j7J27%JJ9J8j01M4J33j55k18p3R1R1ppp9p9N0N0p0p0
603A1129o6o5POl5l5O6O7N2k37k27q4P6P6l6l5m7m6K5K6n9n9J4J3j09j10l8l7l2l1l2l2k4
601A0081k5k4k5lmp6p5J53J53j68j67Q4o0j59J29J47j41n1R3j06k49J11K55p2k15R1R0j12
599I655j12N6N6nonol2l3l2l3k4k4M8M8j39j39o8o7J21J21j42j43Q2Q3q6q6P3P3JJL1L1L1
597I329L1k6k5k5k6L5L4j33j34K5K4l8l9M0J83j1k52r2J48O9j70q2O3l4l4LKo9o9MMo8o8P0
595H669P0n0n0J5J4j05j06K3K2K3K2n1n1n1n2qrqrj60j60N6N5k4k4k4k4ooj5j5Lj42j32J07
593G797K07O3j06j05k4k3k3k4L7L7L6L7m8m8J21J20j69j69M6M7o8o8MMK8K8n3n3J33j1o0n9
591G634Nj38q2J58N9q4J1J1j01j02J54J54rj52m8R7N8j83k42R3J46r4k8J16M0j05k3J21o7
589G399o6n8n7K5K5K5K5l0l1l1l1o3o4QQo1o2N8N9L5L6Oj38j22K2K2j22j7J27m2j85n0R4Q5
587F829o0k3k3l2l2N5N6j60j60N6N6j6j6j4j4j4j4j4j3P6o8j70k7J81L7k8k8Q4Q3j29j28j47
585F183kJ41kq1q0J07J08j2j2r4r3K7K6LKj51pP4P4l6l7J5J6j04j05P9P9OPM9M9p2p1L0K9
583F145r1r0L1L2L1L2q2q3j0j1m2m3l3l4NJ48P0k18l1J14n8n7PPj13j13L0L1L0L1m2m1m2m1
581E469P7P7r0r1J36J36j29j28J09J09j55j56J4J5J4J4K2K3M9r5j61J27J36j52j97R1J61J6
579E441J7J8j11j12M8M7k4k4N0N1o9p0M4M5p6p6J4J4J4J4k0k0k1k0J6J5n6n6K0K1n2n1j6j5
577E000j6j5L5L5L5L6j2j1j1j2L0K9m3m2QRQRj00r9O9O9o2o1J0J0k7k8M5M4m5m6K7K6J03J02
575E109j05j04qJ37R2j48p4K63K62p3r3J47O3O3J43J43k4k5J10J10J11J10l4l4l4l4KKKKm5
573F036m5m5m5l4l3j05j05r8r8K2K2l4l4l3l4k01k00O3O3l4l5L8L8j19j19JJj66j67J45J45
571D790n7n7J11J10k4k4k5k4l5l6l6l5K4K5K4K5k4k3k4k3n8n8J10J10l5l5l4l5o0o1o0o0J5
569D401J5J4J5j6j7j7j7q3q3j2j1QQQQnmnnR0R0p4p4oO5J14k9m9R5J67K3J8J62J62J7lJ41
567E111K19K19J19J19J19J19J09J08K68K68j6j60j2K27J51q9j04l2p5j48o8P7p4j46k0k0j15
565F154m3m7k87k81N4j1l47k32J05k1j64o6Nr3k2M0j04j04M0k5r6P3P3j55j55J09J09k0k0
563D469N2N3P2P2m8m8R7R8j68r6J81L7j86j14L0m3m2L0K9m2o1o0q9N5J24j17q9J50J33k04
561D275j39J01K6j18j3j4k2k2N4N4j14j14%jNMMP6Oj38l4J10N0j91n2J88J82n8m9R5Q9n5M
559D189J47P6o9N8K02J93M9KKO6O5L4L4q6q7J21J21j43j43J00J00j26j25J38pj36RK8j15j06
558D591L7o9o8J2J2p0p1j33j33nJ40o7k12j9J24q6q5M4M5o6o6p1P3Q8n6k38KK19k2j49oJ8
556C713J8P2P2j43j44P1P1jjL4L3q6q7j1j1P9o5J1J56M7j92j73O7j1j1K9K9m2m3NMMNj1j1
554C477j1j0O4O4j04j05Q7Q6j77j78J34J33j31j31J37J36q9q8J21k2r4M9N9N9n2n3q3q3j1
552C184j1L1L1m1m1O4O4j12j13P3p0n0K38J05j82j02J86l9j83L6L7J0J0j0j55j02J86J85j02
550C127l2J12j07j07J01J02j15j14o1o1J08J07PPJ6J6j94n0J70j19j96R3L39N0j91j92N4N5
548B925K6K5K6K6nop7p8J3J3J2J3j38j39P8P8n1n1O9O8j4j4j5j4M1M1l1l1q6q5L4L4K7K7K7
546B768K7m9m8K3K4J9J8J9J9n0n0n0n0K3K4K3K4q6q5J31J30j03j04J16k8j91R8J06j81j86
544B331J02K19o9n8J81J00j40o3Q1O6p8n8n8NNl6l5l6l5L6L6L6L5k4k4k4k4K2K3K2K3p3p2
542B416R6R6n1n1n1n1K3K3n0m9P0O9n6k00O2K07K9j14K6K7J7J8r7r6K3K4L4L4L4L4m0l9L2
540B449L3k2k1mj47l5J09L7j08l5J09J09l5q9N5N5q9j20K4J01J02j12j13l5J09J18k6n7n6
539B306j9j9J01J01j1j1j1j2j4j4j4j4K2K2j37j36J3J57P6P7n6n6J7J6rrq1q1N1N0p0p0O6
537B231O5j03j03P7P7NNj8j8j8j7k4k5R6R6o3o3o3o3R3R2k7k8llp6p5K3K3K4K3K3K3Jp1q4
534B032O0M7M7l5l4L8L7l2l2J79J79k28k99J5J60K8m4n8n7P0K14N5r0q3O0Q7J5o3J0J26j8
532B386k29q4J37oj19J21J27j14j36J04J07l8ppj7j6l6l6J82J10k03n8J62J8k17p3J43kj39
531B060NJ68K4o4RP1jj35j36P1P2l5j07l6J08J27j7j80l7J40O7n3J9n2j97J9J63j4q6Q8Q8
529B149j21m9P9o5j00J40J40j00j03M1J7J7nnono0n9J08J09k8k8k8k9k9l0M3M2L2L2Rj36j10
527A862J29J36j04j53Q7J59q1j51Q8R2n2k8k8o7P7J70j67k38R8J20k4J5J5j11L3K22j8k37
525A844MJ72o9j13J27O6p7o3Q1rqMNo7o8J6J5J6J6l4l4L8L8q6q7J30J30J6J5j04j04M1M1l2
523A860l1N2N1N2N1j27j27Q9Q9n7n6O3O4j12j12PQM9M8k3k4j4j4j4j4J7J7J8J7J1J2J1J1p8
521A794p9R0Q9o0o0J2J1RRo3o3R4R5j22j21m2m3J65J65J5j28m8m8PQR7m6m5R9J53q7k06o3
519A588R9m5q5O0J23k2k6k5l5l5M9M9k3k3O9O9j3j2J2j32l3K07M1k00j0J34m2m1k3k3NJ50
517A807Kk38n2J87M6r7K8K8j91m6K18P4j42KM4j00k8J16M9r6k9J14J64p6j42KO4q1j41J00
515A586J46r4j93m9J07J07N3N3q6N7J27j13k26J4J13l1K0K0KKJ05m0k16p2K08O4j10j10j3
513A431j3J55J55j30j30L8L8l2l2M1M0n7n7O3O2k9k9l0k9J4J4j3J31K8k60n0R5N2N2j1j1P0
511A566P0kkk6k6k6k5j4j4j4j3j10j10J06J07M8M7j20j20J02J02j9j8P7P8j39j39O0N9N9O0
509A604m0m0l9m0o7o6J01J01l8l8j8J27J28j60p8O5O0q3k1J23J04j84r4N0lkOPr9r8O9P0n3
507A354n4O7O7r2r2P6P6K3K3Lj42l7K51M5k44j50J39L1L1K6K6j03j02J02m1j40J48J17j70
506A238q0O4J5j28kK86J25j63k17P2Q9Q9L5L5j85j85P8P9klkkk2k2Kj42oK33J13j26r9M6P0
504A283P0j2j2j2j2r4r5P4P4RJ0Q1Q2j46j47P9P8j37OJ96m5j64P6P5j64j12J28O8p5j0J34
502A286J4j29J2J57L7j07j09L5n5n4J03J03o4o5L0L0K9L0RRq7N6Q6j55q9J52J07j33o4Q0l2
500A222l3R7R6o7o8J00J01j28j28n6n5J72J72r1r2J8J8n5n4k9k8k9k9K7K7K7K7L3L2L3L3r0
498A203r0P7P8p0p0J46Kq4J55J01k35k67P0J57J3Q8Q8q9r0m3m4j4J30rj53j36J05P9o4L1L1
496A096M9N0k3k3j2j1k1k0J05l8j20K5J01m3m2J01kj46K2J65l3j77L9J82K9j16j07L7N0M9
494A166o1o2KJKJL9L9l3l3m0m1L2L1L1L1q0q0k0J24k0k0j9J26J4j29l2J12R4j46q5O0N3r0
492I67j37PQ5Q5o0n9l0J14O8p6J4J3p6p6R1R2k3k2O8p7JJ46k3j67n9Q5j3j4J52Rk17p2K11
490A007O7j88m4J84J84j59j58l1J13L2L2k1k2l9J04N1r4q4N9L7L7k6k6J2J2o1o0O6O7n3n3
488I45L7L6N5q9m9R6K3j21j38NP7o6K1J66J0k30j09J31J34rkkj07L7J80o1k13o9J16J17m3
486H78m3m5m6J65K0j54j1O8O8jkJ7j27J7J61Q0o4p1p0p9p9N0N0M9N0m1m0J28J27p7p7Q5n9
484I27p1P3Jj43M6J91k5j70jJ43O1q2r4r4O5O5rrqrP7P8r1r1MMLMMLMMj9j9N3N3m8m9M1j03
482G69j7J26N5q9qJ37j22j21L9L9L9L9n6n7O4O3m9m9j9J25M9r5j67k4J24k0r2N2J34rm0m0
480G80M0M0M0M0j02j02J8J8P4P4qpP1p4j93m9R6R6o3o2J7J8J8J8K5K5m6m7M3M2l8l9P1p3o3
478F98J76R1n2M3M4j73j72N2N3r0N4O4q1K0J64mj48J3J56n3n3N4N3j14j15L6L5L5L6K5K5J6
476H88J6M6r8j7j7j%QRj34J0J39no4Q1Rj36K7J71n4j98J00R9p8p8K6K6m6m6L0L1L0L1j8j8
474G69N4N5m0m1m0m0J0J1J0J0l1l2l1l2K9K9L0K9k8k8Q3Q3m4j88q3J57Q2o1n6Q8N8q6q5N8
472F99J44%j20K4R6m8n4Q9P1j70j15K8O7p7J2J3Q0Q1q8q8L2L3L2L2n6n6J5J6P1P0m9n0n2n3
470F29K0J9O1O1j1j0qqqqmmmmn8n8O2O2p0p0J47J46o5o5o5o5N4N4o6o6L6L7L6L6o1o2J1J1
467F42j7j6j6j6rrq0q1J67J67m9m9L7L8l5l4n9n8K2K3K2J67O2j79r1N3k6j69J6J59klklP0
465F42P0L4L5l7l8p9p9Q8Q9q2q3L8L8m2m2m2m1J10J11L8L9j56j55J57J57j28j29rrQ8Q8J6
463F87J6n5n6j9k0M0L9q1q1J9J9j7j7N3N2k0k0J9J9j13L1J15j24j30J10J70p0o9J70L1k09
461D89j43J93J14j27j20J19J02j37j02J38J34j05j72O8J41lj17K7J16k7j47mJ43jo7J73R1
460G76k45k63J70K15k6l1l1j30j30L7L8M3M3OPK6K6K5K6rrm5m4P1P2q7q7k1J22l1l1P3P3%
458F29Jm5m5rrJ77J78l9j82j26J13O0q4M7J91p3k17J2J57j01j02qpK2J67O9p5k2k1k5k6K0
456F27J9j16K9J09l4p9O4N6q8j9k0o5o5P7P7NNJ7J7j9j9L5L4m6m7P8o6j47lJ21k3n9Q5L7j06
453D71k6J19o7o8O2O2MNJ58J4j25j24P4P4K4j20j29J6J45Kp6O8J21j20j28J5j3j3J16J16n4
452F03n5Oj38j16J24J33j1Q3Q4j42j41L4L4kkL8L9P4P5K8K8K8K8N5N4o5o6Q4Q3j32j32Q3Q4
450H80l6l7J0J0Q2Q2r3r4Kj41k9K11J39j01j06L9J4J5l9l9L3L4j41j41J72J71mnK0j24j62
448F22P9P8j62K7J70j2j57l0l1L3L2N0N0N0M9p1p2n7n6j02J39J47r2q9N4L1L0O0O0o0o0k6
446F84k5k6k6M9M8K4j20m9J91J19j22j9J25m4j87o7J73J00j39j51pJ07l7j2J31J1j33M8J92
444H38l3j78P7P6n3n2L5L5L5L5J2J2j07j08P0P1kkN7N6o3o3M4M4M4M4q9r0j7j8%%P2P2j01
442G53j00O7O7l1l1l1l1J4J4J4J4M3M4p7p6M8M8p2p2O9O9j00r9J53J53o4o3N4N5j14j14O6
440F70O6n4n4J17J17n2n1r4r3J22J23j11j10N7N7NNNNn5n5J7J61J04j36p3P1m1m1M0M1j04
438F59j04J13J12qqpqp7p7mnJ5J5J5J5K0K0J9K0j8j7P8o6j57Q3J55q6j02M2L6j08J8J62L3
436G78j11K6K7J8J7j30j31Q5Q5q9r0P9P8K6K6K6K6j12j13N5N6LLLLqpqqJ1J0J1J0j5j5j05
434E20L8J44%j68k5J92M8k07o4J04J03L1L2M9r4j4j3l7l8M4M3q3O0P0p5o8P5j4j5M2M2j68
432E54k4J24k1r3N1R3n1n1R3L0j14j05M0M9N0j3j3mmk9J16P9j61r9M6l1l1R9R8n5n6J07l7
430F37m2J03j8j62o0Q3j6j6J69K5o3o2j3j2R8R9j12k55QJ53qqJ55J0q6q6K6K5n1n0p5O9J31
428E96j09j16J25J91m9o1Q2m1j86P2P3r1r1P7P7J8J9J8J9K7K7m5m5j2j1j2j2Q1Q0l9l9o5o5
426D93N5N6ooO6O6m6m7m6m7O7O6j49j50M4M4k8k8Q8Q8q0q0MNP6P6k4k4M7M8l0l0l0l0k8k7
423D53k7k7M3M3k8k9J5J6J5J5j1j2j2j1L8L8l4l4k3k3M9M8m4m4J23J24j30j30Q7Q6l4l4l5
421D71l4O1O0o0n9J33J33j30j31K6K5m7m6N0M9p0p0Q0P9q8q8R7R8k3k2k0k0N3N2m9n0K2K3
419E05m4m3K8K9o9o9J00R9m3m3l4l4l5J10J1k30j15J24N6q9J08J08p9p8J15k9j49mJ23J23
418D52j22j23n3R0R1n4m4m4o2o2J07l7j05J34J69p2p4O9l4l4M8M7%%j10j11P4K18m6j90L9
416A61L9J5J5J13j27q3O2P6o7K3K3j7j6j6j6mmj3j3Q8n7j25J14J12j28n6J84J1k29n5J86J4
414B10j29m2J01mnMMJ8J8n5n4M0M0l1l2J35J36l3j76j55Q3J51Oj41LJ23k1j12L1J4J3j1j1
412A18j1j0popom4m3j25J8K4K3L3L2j41j42J80J79j69k5J62p6k19K1J36j05k1J23lj47R5K38
410G5K2j20j05L9K1K1k4k4O5p8m8R5R5m7r1N3L5L3k7k8j09L5J04J04n5n4O5O5n5n4NNNOJ6
408D5J5J6J6k9l0k9k8mlQ5n7q6N9J20k3j04j06J02J01o9o9N1M9j0j1jkk5J19O8j71q2J58Q9
406A54n5k1k1M1M2j07j06O2O0m2m1J19k4j64k1N7N7N8N9j14k58lJ42O0q3M1M0L2L2M1M2k9
404E0l0M5M5p5p4M2M3j7J27J28j13j18J22R1j48j42R7J17k7n7Q7P3p0j01r9N8N9K3K4n1n1
402E8K0K1M2M1N9q5j12L2J04m0k9J15L4j10J21J21K5j19l2l1J27J27l2l2M9N0j14L0J72o9
400E43j55Q4J57q4o7J73L2j12o4o4q2O2P8P9l3l2K4K5M2j01n0R5K3j21k8J16r4r4J36J36j76
398D48j76R9R9k1k1j2j2l9l9j02M2Q7n7l3J10N1j90n6J83nj50M5M6j26J8J97N3j15K9Q0o5
396C68n6Q9k3k2N8N9k6k5k6k5J2J2Q4Q4r9r9K2K1ppJKj07L8J72o8j48nJ57J3n2R2R1n2q8N7
394D97KLN4N4j8j8J42J42j23j22J23J23r4r3M1M1P7P7q0q0M1M0QQo4o4N5N6o5o5o9o9N0N1
392F61M9N0M9M9m0m0nmk36k36J72J71j06j07J58J57q3q4L7L6j37j38L1L0Q6Q7J4j30p5J64
390E80N0j89n9J80Jj43k3J21m2m1o2o3J0RL1L1mnm6m5K7K6kllkN6N5j6j6L0L1m2m2K5K4m7
388C92m8j11j10J05J05k6k6M6M5K7K6K6K7o8o8N3N2k5k6M6M7PQPPk1k1N1N1p2p1M8M9o7o7
386C98o7o7J05J05o3o3M5M5N4N5r9M5P2k16j35J54K16p2r1N3m6m6k2k2m9R5J29j59o9P5q0
384B80q0M9N0l0l0R0R0q4q4L7L6L0L1m2m1o0n9J08J09q6q6Q3Q2qqp9q0M0M1l2l1L0L0r0r0
382A16L9M0L9L9j7j8j7j8n7n7J5J5J00J00j15j16J7J7j0J33J76j12j42JK5K4J0j35n6J83J11
380C30j28m0J05j11j12J32J32j32j33R9R8k2k1m1m1m2m1R0Q9J7J8K8K8m4m5L4L3l9l9N4N4
378C10o6o6noJ9J63N6j83j21K3L7L7k6k6rrj29j29J89J90k6k6p7p7R1R1q9q9L1L1j01j01J14
376B1J15J02J01j9j8r6r5K5K5K4K4K4K4m3m2m2m2j2j1O0O0m7m8P2P2MMMMq1q2L8L9o1o2J1
374E2J1K2K3m9n0NMO7O7M2j02j65P4J65K0n2n1k1k0k0k0M7M8M7M8k0k0k0k0m1m1K9J72N1k37
371D5l0K58R3j95j68k4O8O9OON7N6j6j6q9r0L1L1kkkkONONKJqpM5r9j98R0K23o4n5Q9N8k30
369d7p1K15N2k36j7J25m1m1J34J36K4K3q7q7J1J56P8k11j16K5M7M8j7j8j7j7J9J9R1R0j52
367A18j51J11J12m3m4m3m3J1J1J1J1l4l3Q6Q6J8J9n3n4r4r4J21J21n6n5J6J7onJ15J14j43
365A47j43K4K5P4P4r4r3M8M9M9M8j71j71J40J41j42j40J23J21k9k9k9k9N9N9j09j08N9N7j3
363cj4l8l8pJ35N4q9P2P2q6q6J28J30r7r8O5p9n9Q4ooO1O0j55j0J60p9j44J90J81j55j49J86
361A80O2j78j02M1J6J7M4r9k8J14L5j08N2N4M4M4j04j03K1J66m2j84P1P3k2k3O8p6rJ35q1
359G8k25J12K56j07j07J23k2k16K3K58p7j84N5O8p4L0K9q5N9J26j12j34J06M4r8K2J64L7j08
358D1Q3Q2m6m7RRJ0Rj36j35Q1P9n1n1K0K0l3l3l3l3J4J3Q6Q4j23j24J40J39o4o3J51Pk77l8
356b10K30qj14J24J20j21j5J30nj49J3J2LMk3k3M7M9l1l1Q9Q9j16j16N2N1N5N5j13j13O7O7
354F9nnp6p6M9J92m7j91j4J28j2j1O9P0p2p0Q9n4j51rJ97N5j36j37P0P1qqJKq8N7O4p7n6Q8
351c2kkl6l7L5L6J6J6J68K4j64j63J80L6j32J2J69K6m9m9j48mK17P4j90m5J02m0l1J12o9o8
349c8J07J08j63j63J49J47q4q3L5L6m2m2m3m3Q5Q4q2q4J69J69r5r5opopj0j1O0O2k3k3k3k3
347A5P4P5j42j40J59J60qqj05j04J5J4N9N8o1o1l5l6l6l6L2L1m0m1J26J24j3j2J60j29j45
345e0J41M6k41j13J75M9r3ONk3k2P6o8j41J47J46j40q2O2P5P3O8p6j74J13J78j10j71J15J58
344A29J5m8R6pj50J7J62J7j26L5L6m2m3L0L0j1j1j1j1o3o3J52J52j02j03J8J7J%JJk8k8M4
342A06M4j8j7r0q8J54J55o1o2l5l6l5l5P9Q1m0m0J05J06j09j80P3K18m3j15L2L3m4m4O1O1
340B16n9n9M2M2p8p8P0O9j2j2L3j11j07J30J05j35o3J76m0k79K5L61l1k70O3K06n1j23N4j8
338F6j50Q9J67p4k6J17M6j94k5J19n6j27Q1Q2r1r0MML4J77L4j11r5M6l9L2K11O6k24q0Q6n6
336B3q2O1O2q1j9J25Mo7M9M9k7k8L0L0l3l3j40LK70J28j04l1Q1o3k04n9O5O6J2J2J2J2k3k2
334G8M9N0r5r4P2P4j21j19M8M7K1K2K2K2noj4j4J64J9j70P1J06j33j27J11Q1o4q7q7Q5Q5O7
332A58j72j58Q3R4m8m3R9Q3Q3o1o0J1J2l8l8Q2Q2oonoL1L2j36j35J09J11n7n7JJp0p0N4N4
330A4N4N5k8k8r9j00P8P8OP%JrrR6m9j10J28Q8n6l2l2j%%%n3n4J8J8MMLMk3k3M8M8J5J4J4
327H9J5j53j54K06K06m7m7m8m7J2J1o0o0J29J31q5q6Q0Q0j37j35Q4Q2k7k7k1J22J20j21j92
325h0M7J06l7o7P6P7o7r5M8M8r5o2Q1O2O4n5n4J6J7K1K1n0n0ppQ8n4q3J55R0j49j38J00J03
323G0m0QQp3p3R6R4P2p3j13J24J26j15o8P6O2q3n2n0J06J08l3l3l2l3n8n8O1O2POo5o4J2J3
321en9o0J23J22m5m5L3L3q7q6j5j4N7N6n5n7J59J59j84j83J29J27r7r5K3K3m0m1L1L2R3R5
319A27j22j20N0N1p0o9M9M9M9M8o1o3J0J0L2L1l9m0J26J27r0q8k5k4k5k5J45J47j18j17Q4
317C9Q5j30j31O9O8n0n1J37J39j26j25P5P4j40j40J69J69m6m7k5k5k6k5K5K5K5K5m1m2L0K9
315A3P6P7N2r1k07L3J45Lj72k9J35J36K9j15j76O2J00m3r6J42L4k05l9K01N6j82j06J34J38
314A05op7p6J2J3J3J3k5k4k5k4P6P5P6P7j45j43J19J20p3p4M7M6m5m5K6K7J0J0J0J0j35j35
312a67J28J27q7q7L2L3nnnnk9k8R1R0j4j4j3j4n9o1O0N9L3L3l9l8q5q5Q2Q2RQRQj7j7j5j7
309b2nnnnK8K7m3m4M1M1p8p9R2R2K0K0l7l6Q3Q3rj0j30j29M3M3k9k9RQRQk4k5M8M7M7M7k4
307F8k5J2J2J2J2q9q8j6j7J3J2Q5Q3l2l2L9M0j7j6q7q9%%P2P1k1k1k2k2M6M5p3p4L7L6l5l5
305a16K2K2R3R4q0p8pqmmO6O8kko4o4PJ50N2j86n5J84N9j80o0Q4j1j2N2N2j9k0KJo9p1M9M9
302fM8M8K5K5m7m8j5j5j5j5J5J7j03j04L9L9J10J10J9J9n2n3K9K8K9K8j53j52J12J10o2o0
300e0N7N9L2L1j35j37J28J26m1m1qqp9q0Q0P9l9m0Q9R1l0l0l4l3l5l4J07J09o0o0L6L6l7l6
298A3l1l1l2l2P3P1m6m8P8P8r0q8K0K0K0J9J8J8n2n4J05J07j10j09M7M7M8M8n3n2J9K0k1k0
296@k1k1j2j2j1j2Q4Q3J3J2ppp9p8J8J7J7J6qrj0rJ3J4n9n9N2N2N1N2j0rq1q1m7m6J22J21
294D9q7q8J26J28j19j19M8M9K9L0m1m1K3K2jj44K5K65N0j90j30J2J32J32o4o4QQpoponnO7
292G9O7q3q2K7K8Jj42m4J95R5j44p3J66J37j04j53j0N7N7n3n3n6n7J11J11p8p8J36J38j84
290A1j82Q0Q1j0rO1O3p6p4mlO1O1n8n7J04J05j11j09k4k3k3k3R7R6k3k2j1j1j2j1L8L7j29
288a10j29J34J33J4J4q2q3j2j1J1J1J2J1j0j0rj0O9O7n0n2k0j9N2N2k1k1N1N1n0n1K1K1K2
286dK1q3q3m5J95R0j48n7J82M2j02N9O0j17j16N4N3o5o6L4L5n6Q8J29j4n3n2P1p0q0O4Q3n8
284im2m2L1L0J20k4j41LJ21k2j28J4P7o7POj2j2Q4o0j29J11J23j15l8l8ONK15P1j76l3R8j40
282a06j20J20J76o4q2q4O1O1J1j33j3J31QRJ7J7p6p8M3M3K3K2m9n0jkj0j1Q5o0o9P6J00m3
280d8j54j0M0M0M8M9n0n0n0n0J31J31q3q5P8P7NOo2o3o3o3M6M7M6M7KKKLk1k0O1N9j01M2J09
277I8j28j70P0Q2o2m0J04n7n8J25J24m3m2m6m6J6J7o5k08j4K27J94m5j5j5n2n2n3n2O9O9m
275g2l%%p2p2N3N3N3N3m1m2m1m2M0M1M0M0l1l0l1l0J09J09n9k01r2J49Q5n8N0N0l0l0l1l0
273a13M1M2m7m7m6m7M3M4M3M3o0o0O0O0l0l0l0l0N7N8j5j5K6K6K6K5m0m0m1m0l2l1J84J84
271A68q6q5j3j4QRJ7J7k17p4J56J56MMK1j21r9M5m5m5Q4Q4p5p5k0J24J24k0j13j14J32J31
269F8j1j55q3O1Q4Q2p4p6MLLLj6j7P4p1r6M8M8r6J1J56j2j56j1J33k8k9P0P1P8o4r4r5O5O4
267e8n0m9P0P0j18j19N0M9mnO8O8o3o2l2J12K0j24j78O3K31Q6m1m1M0j03k38JJ73K9l7J06
265h6N6q8J0J1j3J31J31j3q0p9q0q1q5N9M9N0k7k7M5M5N3N2j8j8o4o4R5R5lj45q3O0J20k2
263a4j35J0O2O2m9m9Q8Q6p9q1k0k1k1k0J22J21KKm6m5P3P4p3p3jjo2o2J07J05j02j02l0l1
261b03L1L1L1L1L5L4L3L4j53j53J10J11l7l6L5L6k4k4k4k4J5J5J6J5PQP8Q0r0q9j8j8J07J07
259A07o0o0K9K9o8P3J59j30j37J48K05q3j52qJ1J0K0J9rrrqK1K1K2K1q3q3L5L7m7m7K5K4k8
257el0M2M3j22j23J89J88j31j29J32J34o3o2o3o2L7L5L7L6k3k3m9R3J68j20k40M8J45Ln8n7
255c0k8J16J13j27j56Q2J96m4j32J0P3P4pj51j00J39J00j40k0K18N0j89m0l9mlmmQ6Q7q1q0
253c5L9M0n4Q7J38j02m0J05mnMMj2j2O0O0J99J99o4o5J93J93K5K5J03J03J03J03N0N0J32j3
251A609O8O8j8j63J37K82l9j84l8l7o5P9P5o9K1K1r6r6P2P2J0RJ0J0K2K1o8P6J11l2K1L58
249B247K12k8J94N30L95K51M49O89R02J142J370J515J922K258K318K462K734K878K805K806
248C0051L068L067L125L124L171K932K489K058J735J303P15K82N2j89p35j166j272j416j593
247E0801j737j857j857k025k025k032j888j952k095k079j934k016k015j932j788j739j740
246A8090j454j311j166j167j050r06r66r67q35n00m72o17n40l00l15l15k99j54j16j15j14
244D411j14j14j14q3q2Q5Q6L8L7q2q3K6K5J7J6M9r5j04L9Q4o1K9K9j37j37L1L0j77j78Q0o4
242C487j49oJ05l8j80j80j79j80j25J9o2o1j25j25nnj28j29Q8Q7k06k07R7R7j36k80J7J7m9
241A459m9J61J8k81j36J82L7k38KJ76o5k75l6J68K4r0N5M5r9j7j7k7k6L7L7J08J09j67j68
239I27M9M9r1r1j9j8J8J8J8J8N5N6o5o4K8K8m4m4n3n3n3n3J5J4J4J5N4N5j7j7NOONq1q1j0
237E99rNNNNM0M0L9M0p9p9p9p9M3M3M2M3PPo5o5o9o8J48J48l5l5l5l5m3m2P7P8L6L5q4q4K1
234E21K1K0K1l2l3l2l2n7n6J11J12o3o3RJ0q9q8J28J28o4o3o4o3M4M5M4M5o2o2J1J0m2m2K9
232C02L0R5R6j21j21rqqrJ57J57n9n9J9J8J9J9P6P6m4m4J24J23N2N2K9K8K8K9J13J14n4n4
230A166mmp6p6N8N8o3o2m6m5m6m5j0rj0j0o3o4N7N6j58j58N8N8j23j23M5M5o3o3N7N7o9o9
228B56R9m5j71O9K37lk08o4RQJ0J0J0J0J0J0j10j10J28J29m0m0L9L9q1q1J2J2J2J2J0J0J0
226A98J0j03j02O5O6KJKKm8m7P2P2r0q9L0L0j0j0j0j1J36J36j29j28lklkOOn6n6m5R9N0j88
224a49o5K22K17p2j77l3L5L4J37J36j76j74JKO9K15k4l10l9K49l3l2j5j4m3m4m3m4O7O7mn
222d5p0p0R7R7r9j00O8O8qqo2o2r1J98J43j44j40J49M9r5L6L6J7J8O6p6j67J21R7m4j00M4
220g7L2L2L9M1j6j6j7j6p8p9M1M1l4l4Q6Q5l4l6l6l6J1J0O5O4J35j53k33N5N7q7Q4Q4j09j08
218b37J07J07n1n0n0n1M1M1l0l1L5L5L5L5n3n3O7O7r6r7J20J18n8n8O1O0j0j0j0j1rrrrq8
216a51q7J29J28p6p7M3M3o5o5PPJ05J03j11j12J14J12n4n5l2l2M0L9qqO3O3r5r6K3K4mllm
214i5kllkm3m3K8K9K3K2K02q6l17l0L29M2k73J4K26Q3r5r4l3l2M6M7M7M5j07j07O0O0L5L5
211Hl6l7m4m4K8K8pqppk5k5M6M7lkllPOOPm0l9o6P7J15j72o2K26P3k13l7K50o9k15J49J48
209E7j19j21R5R5o9p0KLJ48J49j63j63Q5Q3l4l6j2j1Q3n9j59Q2J58q0j12J28J22j17r7M7m9
207a34m9J02J01p1k16rJ35J25j8q9q9K1K2P1P1m9m9N7N8k1j65m7R8J7j28mmj3j3J11J12j05
205a72j04J28J27M0j02j2j1k1k1P3P2r5r5M1M1j21K3J31j3j34J1J85L9j74l2J56J1o6o7J9
204a43J9J9J9o5o5J36J36O0j80j17J23R9m3j09L4j5j60RJ53R9m3M5M6j08j09J2J1N1N0N9q4
202f1JJp1p1m2J02K1K1r1r2J16J16L7j06l5J10m6m5l7l7K6K5j0j1N3N2j9k0m1m2onJ46J45
200H4j17j19K4K3j2j3j0j1j1j1kkl7l8J73J73r1r0LLLLl3l4L9L8l8l8kkK6K6K7K6k3k2J3J3
197e9o1o1J07J06j05j06O2O2l7l8Q2Q1k8k7o4o4k3k2M9M9pqpqL6L5l6l7J7J8j9j8o6o5J02
195a60J02j04j05J12J12j07j06J3J3J9J9N5N5p5p5R3R4q2q1L9L9K9K9Q8j98j08J80l7l6kk
193a87p5p4J25J24NMn8n9O1O2p2p2N7N7r9M5J08j33m6R8ppR2n1j50Q9R3n1K1J64n2k91k8K13
191i4L6j07k9J15J01m0k00n7P5P6J2J2o0o0O0O0j0rJ10J10j92j93P1P2N0N0k2k2J8J8j8j8
189h5k8k9M3M4rqo5o6j33J07J87n2q6N8kkJ22J22j89j89J3J4J4J3J15J15j48j49P4P5m5m6
187b15N6N6j12j12J40J40k9k8K4K3r7r6K5K4p1P3J84n6k24J5K10O5n4n5l9l9L3L3l9l9M3M2
185a19m0J04N9j80j52J84J83j52j60P9nmJ2J2J1J2klkkL5L5L5L5p4p5M6M6l1l1M1M1j08j08
183b78J09J08p8p8R1R0q9q8L1L2K2K3n0m9k1k0R0R0k8j72j3J31M5r8rrO8O8mmL9M0q1q1M1
181a32M1l1l1j5j5P6o9r1N3L4L5M6M6J6j28r2N2J24k0j93m9J73K8j40R9J11j28k10J27J87
179i6n4m1J03OPo0n9o9P5mmP7P7p6p6Q5n8j03M1J67p3j04M0J7J6L0L0m2m3J8J8J8J8L1L1L2
177b5L0k6k7k7k7k0j9k0j9J5J5J35J34j30j30j1j0L0L1m2m2jjjjP9P9m1m1j4j3N8N8n8n8n7
175a97n8P0O9n0n0O6O7j02j02Q8Q7j29J6R8j42q8K48Q9k47KJ46p2p2N7N7n3n3O8O7PPPQj18
173b09j17N1N0N1N1p0o9N4N3o6o6O9O9llq2q3Q6Q6J9K0K0J9l6l5L6L6o9o9MLl1l1M1M0k1k1
170b23k1k1J32J32l6l6k0k0k0k1%jp3p3J13J12n6n6RRQRL7L7q3q3J5J5J4J5l7l6l6l7P8P8
168a76m3m2j9j9N2N3J6J5J5J6J2J3j08j08N5N4j8j7ONOOn9n9J13l2j74J14J44Jp8p8L3L3l6
166c04l5j5J30J59j28m8R6O9p6o7P8NNJ5J4l2l2l2l2J7J7J8J7K9K9m3m3m3m2K9K9J7J7J7J6
164a49j7j8q9r0J59J59n6n7k6k5k6k5O6O7n3n4qrqrk2k2R8R8r1r1K9K9lmmmO3O2j0rj2j2j1
162a84j2q8q8L2L2M2M3l0l0Q7Q8q1q1k4k4m2J02J02m2m2J02J6j28l8l8O7O7Q6n9r5M9L1L1
160a49j4j3j82j82J66J67M0j03j14L0N9O0opppK3K4J4J4M5r8l6J08M9r6q7N8o0o0K08O3k10
158c03o5J17J17j00M4N3r1j23K1N2N1L6L7q4q4N9N9n2n2o8P6P7o8M2M2l9l9P4P3j42j43J54
156b69J55k9j72O8O8o7k11N2J96Q1j58l9J05R0n4n0m9O1O1j04j05P2P3o7P7R1n2r3J47P4j65
154b13o7P8j8j9Q7Q7q2q1j4j4N9N8j26j25R0R0mmR2n2k13K6R9R9kkp4p4J15J14j49j50l5l6
152d60Q4Q5M0L9j28J6J86n3k21J8J90M5j23K2J83n7j61j8M7M8j6j6K2K2K2K1p4p5j05J35J66
150a16p3q6N9L7j06J3J58j3j58J01J00p6p6mmmmO8O8L2L3q8q7M3M3l0k9MMMMRQj11j12L7L7
148c15l6l5L8L8L8L9m6m5J23J23k2k3j43j42O6O7ooN5N4j8j7n0m9K2K3L1L2L1L2pqppooj86
145c68J03K40m7j31j32Q6Q6J4J5n0n0K2K2M6M6k6k6p2p2R6R6j08j08O0O0K9K9j39j39J16J16
143a86mml4l4L9L8l5l5Q5Q4l8l8l8l8O5O4qqj8j8j8j7QPQQklklqqO3O4p1p1JJl8l8L4L4L5
141a77L4l8l8J5J5J4J5r2r3K7K8J08J09j56j55L0L0L0L0P2P2%jk2k3k3k3L5L6l6l7k8k8M4
139b26M3K2K1n1n0KLKLn0n0J57J57J4j31j22j22MMO7O7Q8n5m7m7J1J2J2J1K7K6q4q5J1J56
137b00R2n1o6P7P8o6n6Q9J50Pj34j36P2P2n3n3n3n3Q1Q0l9m0k6k6R5R4j09j09J97N3j59j6
135b08J04m0r6M7k4j69J5J59n2n1R3R4l6l5N3r1j0j0q4q5K22P8k61j18J14J14o1Q3Q3o2j01
133c35j02O3K08Lj41j2J32n9n9J19k6j59Q0J46j90q9K47J3k27R3K38j23j23J06J05j10j11
131c13N5N5r8r8m5J96J39j01j52Q7R1n4J1J1KKr7r8J18J18j20j20M8M7LKQ0j59k8K13R2k44
129c57j22K2L0L1J23k0j49oR4n1K2J66K7j16j08L7K5K6K6K5P4p1q5N8J40j01m7R7J0j34K9
127c05K8p1p1J87M3j75l2R4R4L8L8q2q2ppk5J18K2j22n6J84%j45rJ34ooKLK4K4r6r6P4P3q2
125b95J58J66j68j69J67N1j89m7J92r1r1J01J01j69k4J43%%j%j45lmN1N0N5q9qql7l8J31J31
123g9q6q5M3M4p3P2P1p3L6L5m5m6J0RJ0J0NNo7o7R7R6p2p1k2k3N0N0k5k5k4k5klkkM7M6M7
121a34M7q2q2L8L7m6m7K6K5OOOOOOo6o6N1N0N0N0KJl4l5j7j7N5N4j4j4q6q7L3L3k7J17R0j51
118b10l7K03K1k19m5J95Lj41P5P5j03j04O5O4rrrrm6m7J22J21j06j07k5k6jJ42J34j07j22
116b62K2J26j7m0m0m9m8R5R5p3p3J03J03j14j13R3R2p5p5M2M2p8p9J12J11j05j05J14J14n3
115a35n4k8k7J31J30k2j68o9J71N3j87j99J37J48NL4L4j05j04J11J11j25j25M3M3p3p4l7l7
113d18J18J18kkK8K7n3n3O6p7k6K14Qk31R3K36j16k61J2J56n8n8P0P1n2n3N9N9n3j97n0J90
111b35J10j29j24J17J68K5r6r5L9M0l3l2L7L7L7L7q1q1L9L8M0M1l2l2j3j2j2j3Q2Q3q6q6m0
109b62l9L3L2k5k6M7J90K0k21q5N8n4n4J22J23k2k2J3J4J7J6n5n6J14J13j03j03J4J4Q6Q6
107a5n2n2j25j24R9R9o9o9R0R0p8p8N8N9o2o1J53J52o2o3l2l2l2l2K3K4m9m9J03J03k6k6K5
105a10j19j10J30J33j1l5l6qqqrOONOJ11J09j52j54O9O8n2n2O5O5pom0l9Q0Q1o8o8o8o8J31
103a63J31j33j33J6J6J5J6N3N2N2N3j22j21R4R4j05j06J4J4j1j2j1j1Q3Q4j33J2J66p4j46
101c16R4J31j4J1J1j1j0q2q3L8L7l5l4L7L7q2q3M5M6J17J17j55j56J08J09q8q7L3L2P2P2m9
99a38m8k8k9M4M4N6N6o4o5p2p2R5R6NOo6o7l2l2Q9Q8l4l3l3l4O9O9j48j47J02J01j8j8M2M2
97a74M1M2K3K2n0m9p8p7M3M2l4l4l4l3Q4Q4J3J2L4L3l8l9K7K6o9P5J00j40k12K8P5o9R9R9
95a28j06j05O3O3K8K8J01R9j31j32L6L5j0j1j0j1M8M8j68j68J37J36p9q0J5J5J5J5J06J06
93d5j11j10K1K2K1K2p6p6R2R2r7r7P1P1LKLKK1K1J1J2k2j65j09J32J93M9p1p1r1r0P8P7J3
91b02J2k4k3O5O5n6j99n3J88O1q3j36QJ33J34m8m8P1P2m0m0J2J1j42R8J73j62j80J56O0j80
89b97p1J69K8j16J5J5OPj1j0O1O2r3r3P5P5q2q1Q7Q7K6K5r4r4Q7Q7l2l3j2j2j2j1m4m3P7P6
87a76n8n9O1O2l8l8Q3Q2j07j06O2O1j0j1o7o7j64P6K53J3j60j7J03m1q1J60L9k01K1J65r9
85b59r9J47J47j17j17O3O4o9P6J40r9j72O9J05l8N7N7r5r6K4K5J0J1o1o1P2P3%%k0k0J6J6
83a51qrrqJ1J2J2J1J9J8J9J8L7L5j78j80L0L0NJ50J73o5p5O8j16j17O1O0J3J3L8j07j50R1
81b49P3p1j4J31p9q0K4K4K4K4N9N8j09j10QQJ27J28n4n4M2j02j93M7K08O5j79l6J38J39j35
79a38j34L3L3m4m5P5P6o0o0O0N9j0j1j0j1K8K7j40j40J64J64n2n2J02J00k10k11J65J64ml
77h5r1r1j8J25P1j69n4J85K10l0m7m6j29j28Q7Q8p7p6J39J38q4q6j4j3m8m7P2P3r0r0P9P8
75a68L7L8l5l5J6J6J6J7k0j9k0j9J0J1o2o1P8P9r0q9L9L9q0q1J40J40k8k8o5o6POL3L4K4K5
73a61Kj42p3K15P3k15j42J45K33n6j73k8J15J15r2r2J36J36j25k69K3L11Mj39jjj0j0J7J8
71a86J7J8p7p7R1R1m8m8m9m8J09J09j1j0k8k9j00j00J25J25r1r1J49J49o6o7k9l0k9k9J16
69a44J16n2n1l7l7l7l7KJk5J18K15p1j59j5J16k9j88m3Q1Q1p8p8QQQQPOP9P9p9p9J37J37j64
67a96j65J00J00l0l0l0k9L0L0L0L0p1p2l3J11K0K0q2q3J0J53Jj44NK45K9k11p3P1k5k4M1M1
65b31M1M1j29j28M0M0K8K7J18k6j45%K9K9q6q6k7K14K31j06k74O2J81n9n6Q7l2l2j4j5q3O1
63c00P6o9k9K10M2j98k6J17r9r8N1N1l9J06J16k9n8n8rqJ59J59k03k04O1O0N0N0O8p6j29J6
61b40Q7n6n4R1J45r5q7N6m0l9N5N5N4N5l9m0j30J5O7p8nJ39M5r8q0q1M0M0M0L9RQo4o4N0N0
59a50p0p0m6m6K0K60N9j82QJ52p1p0K0J9j23K1J56q5j08L6J2J1m6m6q3J58J74j62j62J75P5
57a64j64O4O4n8n8J59J4k19K2J35qr9M5K8K7o3o4q1O2Q4o1O0K04m1j85n5Q8m0m1Q8Q9q7q7
55c42opm0J03J04m1l1l1J23k2j11L4J6J5L5L5Mj39l9J05J5J5M6M6p4p5lmN9O0L2j11jJ44M
53h2j41o8P6M4j00j01M4J65K1j04j05L8L9J10J11q3q3q3q3M3M3p7p7R0Q9l0l1N5N5j7j7j4
51b73j4N8N8j21j22M7M7O0O0o0o0J0RJ0RN9N9j57j57Q4Q4q4N9J28j13n9Q6l2j76J31J30p6
49c16p7J40nj33J08J07j33n6Q7M9M9K05l2k92j47J19J20QRn9n9O1O1n0n0K2K2n0n0K3K2oo
47c09ook9l0R0R1n4n4J8J9k2k1j3j2j9J26O9j72l7J07J2J1j9j9j9j9KKP4P4%Jp2p2R0Q9j27
44b56j27Q7Q6l4l4N1N0p0p0M9M9k4k3J6J5J6J6l7l7L5L6K2K3r7r8M1M0l1l1N2N3j9k0RJ0R
42b43RL3L4q7q6k7k6M5J90J14j26o4Q1q3q2M6M6o5o6N5N4nonoJ9J9J9J9m0l9L2L2qrrqj8j8
40b79j7j8n7n8J5J4L7L7n9Q6J16j24j30J10J39j01m2J03J07l8n8n9m2J02R9j41n4J86J08j32
38a50j22K3kjj%%jm1m0L1L1L8L8k4k5l5J08Mk36j9J25K8K9j0j0j9j9J33j1m0m1r6M7J77L3
36i8q3O2m1k81n4K82M4j95L7L8J3J3K8j15M3J87L0j14rj0k10L0K13k8j47R3Q7j54n4R0j6j5
34c34J69K4j52rM1j03k2J22o2o2J63J63j11j11QRj7j7j7j7P1P2m8m9L9L9l3l3J4J3J4J3L0
32a93K9m2m2L4L4l8l8llp6p5K3K2K2K3L5L5l7l7J05J06o2o3p5p4m5R9O5p9p0P4K6K7R9R8K8
30f8j15j07j07J35J36Jj43l6l5J15J15j1j54q2O2jjP9Q0p8p9M2M1N0M9k3k3JKKKp8p8R1R0
28a26j53j53J59J59j23j23R3R3k5k5L9L8N5r0r8M6O1q3k9K11J02k33j73O7J79L5l8l7j9k0
26b11k8k8J51Ok09o6J26J25q2q2M6M5k6k6O8O8n2n2KKr4N0J47r2j71P0J56q3r6M8J00m5M6
24a87M5k9l0l0k9K4K5K4K4m6m6j27J7R2R2o7o7O3O4Q1o3j31J2Q4n9q6N8J21k3l5l4K8K8o6
22b73o5q4O0J21k4q7N8O6O7m5m5N5N4K4j19n5Q9J07j81j42J46J19k5o1o1KK%J%JM4M4p5p6
19c58M6M6M6M6m3m3m2m3R8R9p0o9l2l1M0M1n5n6J13J13k6k7r8r8K4K3K3K4Q9R0l1l1p1p1R7
17b37R7j02j01l0k9Q6Q6l4l4J1J2J1J1RQQRo7o6ONQPPPJ8J7J7J8j7j7j7j7L6L7l6l5l6l5L6
15c43L7K6K6K5K6l7l7l7l7Q8Q9j28j27P2P2%%K8K8m4m4K9L0L0K9p7p8M3M3L8L8q2q2L2L1m1
13c34m1P8P8Q6n7l4l5m3m4N5N4j14j14J38J39l0k9o3o2N7N8O1O1R7j43k50Q5K80M0k10k11
11d47j12J28K22j9j39J01P1j70j51J84J65p5rJ35m9j94j6J27O6O6r3r3R7R7j19j19J14J13
9a19j02j02N9N9N9N9m7m7j29J6N5N6k6J18L5j10r1J48P9o5l2l2j22K3J03m1j06L7K0K0lkr9
7c29M5K05l4j19J21P6k60j40J96Q1j59OOq9N6K98l7l17p6K15K15J9j26j35J0J53J0j58j4J22
5a59k2mlq4q3Q5Q5q3q3Q4Q5m8m7P2P2q3q2L7L8rj0rrP3P3m7m7m4m4P6P6j3j3j2j3l1l2M1M1
3a76K3K3m9n0L3L3L2L3L7L7j22j22jJ43J13j76o2Q1P2p1j1J33J02j84j35J52P2k17p1P3M6
1b09M5o5o5POO8O8R5m9r7J91P9k08j85J02J66j23l1J13n9n8j4j4j4j5opJ61J60j94j96O8O8
-1b12L5L5q5q4O9P0klj4j4q7q6J31J32J1J1o0o1N9O0q8q7Q1Q0N1N1j17j18O7O7o2o2R1n3j22
-3c16J18J47r3r3J47P9j61r1N2l5l6m5J00O9p4lJ41K0j24j15K9Q3Q3K6j18j36K00K05j29k00
-5b70M1L5k05K8K68Mk37m5J94N3r0L5L4m6m6L7L6L7L6n2n1K0K0n3n3J9J8J07J07o1o1k0k1
-7a82k0k1L5L4N2r1j51oJ20J20p3p3jjl1l1Q9Q9j00r9O9O9J6J6J7J6l4l5J19k5j05j05M5M5
-9b33P5p0j98n5J99N5l2l2J15k9m4J00J02j39j47mJ%J20J21q7k31l5K04J69p1q4O1N8q7p7
-11b75O7j2j2klK9K9M7r8n0R5MMK6K7r3r4N1N0p0p0J39J39k9l0j5j4j5j5k2k3N0M9N9N9j10
-13a28j09L9L9q1q0J9K0p0P4J73K9r2N3M5j00r9M5P4o9o1Q4l1l2R8R8j32j32Q5Q4j26j27R0
-15c20Q9kkkkQ2Q2j25j25N0J94m8k89k3K17K8j17J08J07j18j17N5N5N4N5q0q0q9N5M4M4N4
-17a66N3l7l6L5L5m1m2l2l2j15K9K06O2j39MJ16k8n4n4RRMMq6N7J50Nj15K9j4j57m4J96O4
-19a25q0Q8Q8j73j74M3M2M6M5j55j2J60J59r5r6M5M6M5M6l1l1l2l1J0Rn4n3l4J10J11l4p3
-21a90p3rj0LMJ3J2j4J29N8q7p4p5q4q4J85J84k17p3K35R0k12o9J29J28l1l1k0k1P6o8k20
-23d16K0K21P7j48j49J1J1J00J01k5j70K2J66R4n1j10L4J6J6m6m5K6K7r5r5qJ36jjRQKKR2
-25a69n2j73k9M9M9M7M7l3l4M6r9OJ51M8j91j29J6L8L8J38pj21K3Q7n8N1N1l0l0J0J1J0J1
-27b28N5N5j8j7j2j3j3j2K3K4K4K3q4q4P5P4K7j17n4R0Lj41O0O0p0k14L5K75N1r2LLm0m0Q0
-29b09Q0m6m6pJ37k2k3j3j4j49j50J62J62j31j31R4R4j25K0K56J6k74l3J83n8j80O0J25j14
-31c36NJ48o7o7O2O2j49mJ61J7j50pM1j03J7J61J00m4p5p4o5o5J2J57J41ml3l4m1m1L2L1k2
-33b34k3j3j3p0P4Q3o1j11L3J11J11p9q0J37J35j38j40J24J24j59j59J04J05j2j2j3j2Q5Q5
-35a8l4l5r9r9J18J17m8m7K4K4n1n0K1K1m5m6rj0P2P1r6r7J01J00K9K9m5m4m4m4M4M5j9j8
-37a82o2Q3L2k09mK36O2j79QJ52J7j28m6m6J13J12j12j12N6N5j00j00O8O8J3J4Q6Q6j27j28
-39b74ppJ25J25ONm4m5K8K8m3m3m2m3J18J18m9m9KLn8Q7J56q2j38Mk5k6J03J03j7j7N6N5j86
-41g3j87K9L0L6L7l5l6qrrqQ5Q5J3J3k4k5o0o1N8N9j4j4ooL1L0n3n3j7j7K2K1j5j5M4M3k8
-43a37k8L8L9l4l3M3M3l0k9l0l0l1l0O1O2o8o8J49Nj84N6K03l7j45jJ23k1n1n1l3l3L9L9n3
-45b57n4J15J15m1m2L1L1o2o3J06J06j33j32J31J31m1m1N5r0j56Q3J97N3j78l5R1R0j00j01
-47a91O7O7m2m2L0L0m4m5K7K7L2L2m1m0k9k9PPR6R5j19j19O9O9n1n1M6M6J0J0RRRRL7L5q2
-49e0k28n5J85J04j36P5P5j2j2lmk4j68j30J57K29n8j77l3J35rj47J42O0q3o6P9k1k0J54R
-51c2k57L1K01q8k56L3K61k7r6M8l9l9R0R1j13j13J03J04poopm7m8K4K4m3m4K9K8L7L7l5l5
-53a97n3n3O6O7k1k2N0N1jj%jJ3J2J3J2j2j1q4q3Q7Q7q1q1P8P8q9r0J5J6Q8Q8o2o2J0Rl0l0
-56b24R0R0o8o7MNNNNNKLKKN3N3o7o7%%J%L5L5L5L5J5J5j52j52N7N7M8M9K7j17j08J32O0q4
-58a81J2J2l3l3L8L9j0j0k0j9J14l0j59j5J91M7j21K3J02m1L9M0j21k66M7J91rrRRo9P5P5
-60h3o9K0K1J2J2l0l0l0l1J4J3J4J3p2p3M8J91J41r7j64k0J10l4j06L8J29j5q6N7M5r8j53
-62c13Q7J27j8lkN5q9q9N5k2k2j2j3M0M0M0M0j28j28Q8Q8m7m7P3P3p9p9M2M1JJR1n4j08L5
-64b36J56J1j85m1Q5Q5j5j6j5j6opN1N0O3j78p8J61J44j91j32J08M4j00J06J07k2j66j4j3
-66b60%JR0n4j32J3R0R1llklq4q3Q4Q5N2N3j9j9m7m7K5K4J0J0J0J0k0k0k1k0PPq3O1Q0o4o4
-68b45Q1O9p4o5P9k4k4R6R6%j44p2P2NOp6O8J74L1j42j43O3O3rrl7l6L6L6q2q2L8L8Q0Q0j36
-71a89j36J38J39j26j26J11J11L0L1N8q3j65k2R2n3K8K8J6j28j7J26L4j10J0J54M2j01j2j1
-72a31j8j8j7j8PPo5o5J19J19r6r7Q6Q7l3l4m2m3J26J25j29j30J86M2l49o0L56O9k88jL11
-74FK4k24O3J34j53j20J68Oj38o6P7O0O0K3K3n0m9k7k7k6k7m4m4P7P6P3P4r5r5K1K1K1K0l
-76a61llmQ4Q4j32j33Q0P9PPo4o4N7N6m9m9L2L2p3P2K80ok79j36J26J25PPj13j13L0K9K9L0
-78a29p2p2R6R7o2o1O8O7j26J8J88r8k73J5J80L6o8o8M3M3K2K2n0n0N9N9j09j09P1P1P1P1
-80e0j6j6j6j7K6K6J7J7M4r9j08L5P7o8n9Q5j4j4O8O7j05j05P2P2k30q5J93J94j16j16N3N2
-82a36q3q3j1j1P9P9PPK1K1n1n1N2N2j9j64q3J57R5n0L9L9r0r1M5M4l7l7J02m3j84N6K54J4
-84f1j42KJ11l2o3o3K0K0J09l4j72k9J88M4r4M9N0r4j14L0J02m2r7M7J59J4j09j09N0N0m6
-86b56m6K6K6M7M7Qj36R6R6m2m2J16k7k58j8J69K5q8N5P6o7n9Q5k0k0kkk4J20Qj35m8R7Q8
-88a05n7q2q2p2J67J58q2j00j00lmO8O8n8n8J09J10j1j2k1k1M4j00l7J07L0j13j05L9ppKK
-90c33N0N0j4j3K4J67Rj35j00M5J13J14l9j83l5K04M5j94o9J71o0k04K7J72o0o0O9O9n4n4
-92b78J8J8O3O3j5j59MJ47J9j26O2O2j9j9k4k3j5j5j09L5J64K0j13L1J42kj00j00J1J2JKK
-94b41JKJJ1J1MJ48J50j85j98M1R6m9lJ40J2j33L7L7J9J9j5j59q6N7O7O8NNj18j18J37J37
-96a00K9j15mJ40j3j58j40J01J30j3q6q6P8P8OOo8o8N3N2NNNOjjjjk6k6M6M6m4m4m4m4J28
-98a69J28q8q8M3M3l0k9j7j8N5N5lkp4p5k2k2Q3Q3O8j72o7J73O6j74N4J99l9j83n4R0n6n6
-101b98P3P3r5r5P3P3o2o1J0J1M8M8M7M8r1r2K9K8L0L0m2m2N7N7p2p2N1r3r0J50J01j38LJ47
-103a56k9k8k0k0Q4Q3l7l7jjj03M1J93j43k81J51K67p0n5R0j03j04J22J22j29j29R6R6j15
-104b16L0n2n2P1P1j0rO9p4q3O0N5q9%Jp2p2M8M7Q4Q4l6l6j6j6j5j6Q0Q0m0m0k9l0k9l0R1
-107a91R0k9l0qqr8M5Q8n6n6Q8K5j19m7R8L8j05l3J11M3j00k9J16Qj37j6J27R8m7k9k8n6n6
-109c03J13J12QQj03j03m3J01L8j06LJ46j5j6L3L2j36j35R3R2k7k7J6J7J6J6k5k6M7M6l5l4
-111a97l5l4Q4Q4LMN7q7r5M8K1j22lJ41M1j03N9N9j52j52J12J12n3n2J15J15j19j19R7R7j37
-112b11j36K23K22k25k25J02J01j35J05K44q9j68P1J31j07p0P4J4J4K9K8j40j39k4k3M8M9
-114b37M1M2M1M1p7p7M3M3m9m9K2K3N1N1k1k2j5j6K1K0%%p1p2j9k0j9j9M3M4M4M3o8o9N1N1
-116b05L6L6j%j00j00J16J16j21j22R4R5p6p6M4M4m5m6P4P4RRo3o3P1P1P1P0q7q9n2n3n7n7
-118c83J11J11k9k8QQ%%L7L6p5p5llOOM2M2j3j3J06J07q5q5j3j3K3K2j3j3J2J1J2J1k2k2k3
-121b00k2M8M7J2J1L6L5j32j33QPQ0Q0l5l5L7L7n9o0O1O1o9p0N0N0N6N6j12j11JJJ22J21j18
-123a39j19R7R8j8j8q1q2%J43J13j75o2Q3n3n2Q9Q9l1l1o8o9R6K40P5k13j68J19J3J2m2m1
-125a95o2o2N8N8l7l6L5L5MNMNj7j7K0J9n8n7O2O2r0r0P9P8K5K5K5K5m1m1K2j22n7K32J67
-127F3j19j38J50k1j65J9J9k6k7N5N4o6o5J25J26j38j39R2R2K0K0K5K4m7m8n2n3n2n3J49J49
-129b7o8o7ppj6j6J05l8j38J51J45j41j34J55K9j15r7M7K3K2L2L1J2J2o0o0L4L4J7J6J36j51
-131a41j70J19J24j64q4K05M0j04nnm2m1J27J27j33j32L5L5O0O0j08j08%%P2P2p3p2M8M8m2
-132b52m2P8P8o9p0LLR6R6p2p3L3L3l9l9J3J3J4J3O6O7j49j50L2L2L2L2L5L4o5Q0J24j64k36
-135d13N3J67K3m6m6J07J07j3j3n0m9K2K3o6o6OOJ6J6J6J6LLKLJ8J9J9J8j%p3p3L3L3L4L3
-137a13%J%%n2n2O7O8J0Ro3o3l0l0M1M2JKp1p1M5M5M4M5L7L7l4l5j9j8j21j21m1K47J75j13
-139a31kjk0j9j9k0j9k0nmO7O7m6m5J26j9k24O3J89M6n2n2o2o1L2L1NJ48Q6k00l9J05j28j28
-141c51J07J06j14L0K01q7j68J19J20j68r2J97K5j19J04J04j20j21L2L2L2L2j4j4j3j4k5k4
-143b03k4k4J07J07o1o2klj1j2L7j07j07L6P2P1QQj2j2lll0J14Lj41k6J18K8K8o2o2q0O4J10
-145a36l5m0J04J8k22j62J74J74o6o4Q1llmlO2q2r1N3M8r5q7N8J00J01L7L8p1p1p0p1J16J16
-147i6n9k02J02K47j08j08P5P4k44mK70K9j27J7J5j30m9R5K8K8l5l6J7J7J8J7M4M4j24K0J31
-149c4j09j15J25R7j44p4O9KJJ01m4j69k6J01J00J0J0o2o3J9J9j43%J38pJ1J1m5m6K6K6J00
-151a15R9k0k1L3L3j34j35K5K5j43JJ69p1j49R1J95m6r6M8llONk5k5j6j6QJ52M1j03j25J8
-153b97Q7Q8P1p3QQj07j06J09J09j02j02J95N1p6p5mlm4J00K8j16J6J6PPj6j5J05J04j35j36
-155b98Q1Q1m3m2J67K4j65k1R0n3m2m2K1K1P6P6j41j40J41J42j23j22R6R6J8j25j7J28M7r8
-157a67k2k2l0l1N1N2j08j07N2J97P6o8p0p1J27J28n7k00q0O3L5L5M4M5n8n7O2O3o4o4R6R6
-158e4lj46j55j1J86M1m5m6R2n3r1r2J22J22M3j00p5O9Lj41rK31R6m8n9n9m4J00J35j02k24
-160c17J6L4j11J6J60J01m2M7M7r9r9K1K0N6N5K5j18j30J4M4M4L2L2m0m0M3M4k9k9QPPQkj
-163a76jkN3N3j07j06l1J12N0r5n4R0Q1o3p7p7Q2Q2m4m4P7P6j6j6j6j6j14j14K2J65P8P8q1
-165a51q0k9k8j19K6J60J7n6Q8Q1o3m5m5k7k8M5M4K2K2K2K2o5o5PPL4L4N2r2r3N0J11j29j10
-167c81J31K35nj69j70L1L2J7J8J8J8P8P8m2m1K1K1K1K1j30j31Q5Q6o4o3J05J05j03j02J7
-168b63J8N6N6j5j6opp9p9J29J28m0m0M6M6p4p5k6k6M6M5J0J1o2o2J9J9J9J9j1j0j1j1J03
-171a43J03j7j7j29j29L9L9K1K1K1K1j7j6j6j6P1P0r7r7Q3Q4l7l6LKLKnonnj5j4N8N7L8L8
-173d3l4l3n4n3n4n3Q3Q3J1J1L9M0l3l2o9o9N1N2J9K0K0J9l1l1M0M1q7q7J29J29j62j63m9
-175c50J92J66p2j33J1Q3o2k35MK30Q5j30j31J25J26Nj39j57Q4J55q5j22K3M6M7J9K0Q2Q3
-177c0p5k20j2J32n3j97M9K89P6k61j38PO0O1J50Pj0j0jj45o4Q0J43jl4l4m3m3Q7Q8q1q0R8
-179b05R8p0p0j9j8R2R2J2j32o0Q3N4N4m8m8q3O2J81L7j15j16M4M3n3n2J9K0m0l9J20J20p
-181d4j51j51pP8P9J5J6P5P4j41j41K2K2K2K3L3L3q7q7N8N7K7j17m2J02J02m3r9M5L6j08k6
-182c25k5L8L8R6R6p2p1j8j8m2J03J27j12j18J22O0j79o0J81Q4j56q6N7N2N1j1j2OPOPo5o5
-184c04N6N5L3L2l9l9j%P1P2q1q0q0q0P0P1kjN2N2o7o8M5M5M5M4o1o2N8N9q8q8Q8Q9k3J20
-187gP5k60j30J10M3j00nJ38p2p1O6O6n4n5L9L9q1q1J6J5J36J36p8p7M3M2M6M5k6k7p0p0p1
-189b80p0J29J29q7q7P5P5LLl7l7l7l8J9J8n4n3J22J23m5m5J05J04j67j68J98N3j83N7J76
-191Ao3j14L0n2n1K9L0n5n5J56J1j32J1R0R0n6n6O4O5m5m4m4m4L6L7L7L7n3n2O8O7j10j11
-193b78l3J11J33j1j31J3M8r6o0Q4M6r9K2J66N8q5j4J30p1k15j1K29J34j03j22j23MLo8o9
-194d08J98J99j14j13R2R3K1K0j2j2p6p5r0N4J83L9j00M3J03j36j48R2R5m9r2r3O6O7O8O9
-196a6mmm3m4Q3o1k04o0J15J14j0j1p4p4M7J91Q5j53k6J19L9j03p2P2K6j17OPp5p4K4K4m8
-198c21m8J29J29l9l9O9O9n2n1O9O8n1n1kkp4p4J03J03j7j8j05j06O2O2R7R5p0p2k3k2k3k3
-200b28M4M5M5M4l5l4l5l5M1M2M2M1q2q2Q6Q6n4n3J8J8r1r1J25J25l3l4o9p0L4L4J06J05j39
-202h4j41K7K7n3n4J9J9L6L7%JONl0l0P7P8m2m3j30j30K30K29j50j51J13J13ppp9p9P7P7r1
-204a30r1pqO5O5K6K6m5m6m9n0j3j3p7p8K35K34j23j25M4M4k7k7j8j8q4O1N1N1mnp6p7O4O3
-206a62rrl6l6Q4Q5o7o6OOL2L3L3L3l5l5l6l5M3M3j19K5J31j3j34J1J17k7p0P5O4j75j04J37
-209b10M3j02j4J30p9p9J45J46p9p9KKm3J01j1j54J1J55K6j18P1P2j06j05N8N8M9M9O4p7j18
-210a92j17J06J06k0j64nJ40J0j33Q5Q6j40j39J11J12n7n6k4k4PJ50J24k0n0n0n0m9P0P1n5
-212a67n5k0j9klL4L3Q3Q3q5q6L7L6%Jp0p1KKONQ7n8rj0%j45PJ51P0p4M4M3l7l7L7L8j15K8
-215b36J02J02n7n7llp5p5j9k0R2R1N0r5l1J12n7k02P1K16o4o4J13l0j46R5J66p3q4O0l6l6
-217a93M0L9j70k6J74L1m2J03Jj42n3n3k7k7N4N4n1R4L1j14RJ52n8n8N1N1M2M2Mj39J9J62
-219@j2j57K1J63p7p7o0n9K3J68J09j28j04M1j9k0QPq8N5J41r9j08L6O1O1L4L4r4r4J22J21
-221Ij65j65N0N1K0K0N5N6K1K0j47j47J30J31p6p6l8J07J07l8j25j26L3L3R7R7p1p1J1J1P5
-222a11P4O2q0%%n6n6K6K5j07L6K19k1j93n0J17J17j05j07N3N2L4j11%J44M0j03j3j3k0j9
-224a66N2N3rrrrk4k4q7q7K1J64J63K1j47j48O0N9m3m2m3m2J00J00o8k12RK49Q1j58J8J62
-226a5L5j06j25K0N0N0KKk3j66m2J98J25j13j16K9N2N3ONOOo8o7N2N2n3n4J8J8r6r6L1J74
-228a56J31j2mmk3j67qJ36M5r8JJj48lJ79J78l0k9j02j03J5J5J5J4m5m5m5m6J23J23LLK7K8
-230c1r3r2QQQQk8k8M4M4m5m4K7K8M2M1p8p8opooL7L7L8L7k3k2k3k3L4L4L4L4l4l4l3l4M6
-233a79M6o5o5m3J02K71j6k75J2J80j09k10P8J98r1j35J53Q1k07j66J23J11J11q7q7Q2Q1p7
-234a83p8J39J37j44j45K3K3L5L5l8l7Q6Q7m3m3P2p1j61J26J40mj55j0M5M6j8j8M1M1p9q0
-236b31Q8Q7l3l2rrrrk2k1k1k1P4P3JJn7n7O2O3p4p5lkK7K6K7K7J1J1M7M7j06j06O2O2J2J2
-239g7k4k4q4q3Q4Q5j5j5N7N8n6n5j9k0N7N6K1K0n0n0P0O9j28j29L9L9J8J8N4N4n7n7k1k1
-241a86O6O6oon0m9K2K2N2N2k1k0k9k9o5o5P9P8m2m2KKKK%Jp2p2J56J55j07j08M1M0M1M0k7
-243g7k7M5M5p7p7mnL9L8l3l3K5K4j1j2O0N9o1o1K5K5j1j2ooooO0N9n2n2p0P4ppL7L6j25J8
-245a69J39nj17K8KLn1n1m6R8P1p3p5O9r3r3J22J21KJM5M5k7k7NNJ4J4j32J2R4n1k9J14n3
-248h8j98M8J93o6o5J25J25j37j38P8P8m2m3o6o7J01J01K8K9r2r2J1J0k5k5J0J1M6M7n0n1
-249b04P0P0l6l6L6L6m4m5m4m4J28J27j35j36J77J76p8p8j02M2J22k0j71k7N2N1j6j7K0K0
-251a06K4K4j02M3J14l0l6J08K4k16j35J05L0L0M5M5j09j08J2J2j2j2N9O0M0M0M0L8r8j00
-253a71O8O9p9p9Q9R0o0n9n9n9J3J4n8n8N8N9j3j4K0K0K9K8m8R7N1j89n0K86R5j42m9m8o4
-255b13o4J31J32q5q5M4M5p6p6N5N4N5N4nnonp0p0N0N0j3j3j3j3k4k4M8M8m1m0L1L2N5N5o5
-257f7o5LLKLK9K9n2n1Q6n8j27J14J95m4k38r5J02J01n7n8P2P1r6r7R6R6k5k4j1j1O2O1n7
-259a08n7n7n7Q2Q2q6q6K6K7K7K6J2J3J2J2J3J2K1K1r9M4O0q5j25J15O1q4KJ45O3p8J3J3j64
-261a84j63O5O6O6O6n3n3n3n2K9K9K9K9K9K9K9K9k6k6k6k6J0RJ0J0j6j6P3p0j42JJ61J7J4
-264a06J4o7o7MMO6O7M6r9r8M6K0K0K9K9l6l6l6l6L1L2L1L1n9n9O1O1k1k2N1N0o3o3M7M8L9
-266d1j05j15L0P0p5p4O9R4n1K2J65jj46J7J6l3l3l3l3J79J78j00k44j9j9mJ40J17j23j30
-268b82J11J25j16j18K5j7j8J11J12k9k8k8k8P1P1m9m9O8O8n1n2ppppM9M8p1p1L6L6l5l6J6
-270a59J5J6J5j9j8j9j9j9j8J01J01j60j60N6N5K9K9m4m3P9P9m1m1R4R3K2K2j53j54O2O2m3
-272a80m3K9K8m6m6P3P4N2N3o8o7j7j6N5N6j10j09J06J07n6n6J6J6L8L9L9L7j20j21jjK9K9
-274a81K9K8o8o9N2N1n6n7n7n6J26J27m2m1P6P7m3m3J23J22r4r2r0r1L0L0n7n8J11J11l7l8
-276a77l7l8J36J35j75j76J02J02n8n7j04M0J76L1j20J20J85j50k69O7J75o5j64P6J75L1m2
-277h1m2n1n0K5K6R8R6r1r3k1k1q1q1qJ35J88n1j30J10J76o3j14K9m3m4Q6Q6q9q8j7j6O4O5
-279i1P3p1J3J4nnL9j06j06L9j0rjjqr%%L2J76l1j76m0J03J3J4o8o8l7J06O6p7J2J2ppKKo4
-282b81P9Q9n5r3N2M2j02Q7Q6m3m3nnnonnnol2l2M0L9K2K1n1n1qrO3O4lkp4p5J45J45q7k30
-284c39J02J01p5p5R4R4p4p4N2N2N2N1q5q6Q3Q3m2m1p7p8J31J30p6p7jJ42L7k02q9N6P9Q0
-286g2q4q4L5L6J16J14r9j01k4k4k4k5N8N8o3o2P6P5M0M0n0n1j4j4J7J7n6n5K1K0n1n1Q1Q1
-288a19l9l8J6J6k1k0N4N3j15j15J09J10j1j1j01j02O7O6M5M5k7k8j4j4m2m1J3J57J06j33
-290a34j93M7J94N0j02j01l9l8N1N1N1N1M1M0p9q0K8K7m5m5j4j4n0n0J80J78j79j81Q7Q7l2
-292b13l3N3N3N4N3o9o9m5R9J02j38j12L3L9L9J1J2JJKJK9K9r1r1J1J2j08j09K35K33k3k63
-294b62r3J47J14l0N3N3j72j72Q2Q3q6q6Q4Q4Q4Q4j04j04O5O4p5p6llo2o2J55J54o8o7N2N2
-296a15K9K9r1r1J07J08j3j3j50j49O6O7M6M6J1J0q1q1Q7Q7n4n5O6O5p4p3jkR2R1j15j15K6
-298b40J70K3k17p9J60J28j7q9q9K2K1L9L9L9L9m6m5K6K6JJp2p1P6P6m5m4P9P8m1m1N9N7o0
-300c7o1O2O0m8m9p4P1Qj36lJ41O0q3l2l2m1m1J5J5NOO8p5NNK8K8K8K7q7q7J28J28m4m6m5
-302a33m6l5l5Q5Q4m5m6P4P4o0o0J2J2PPQPM5M5p6p5L7L8j25J9J49No8P7l7j82L5J79m3j87
-304b54n7Q6kkPPK6K6m6m6J14J15n4n3O7O7j00j00m4m3K8K9O4O3qrj9j9j9j9%JP2P2PQn5n6
-306a46m0J04M1j03k3J22m0m0L0K9m2m3o0o1K04K03j45j46K3K2j2j2N9O0J6J4J5J5r9j00J15
-308d0J15k03k03J08J08l4l4L8L7K8K7K7K7l5l6l5l6M8M9p1p2J4J5J4J4J0J1J1J1J0J1L5j09
-310a40j45R6J05m0%%q2q1J43J43k5j69q8J52Q8n5LLopL9L9n8Q6P4j65j66P4P8o5n1R4j3j3
-312a52O8O8m5m4K7K8o1o1J1J0J1J1J1J1j1j1j1j1M5M5M4M4j8j7r0q9ooO7O6l5l6k6k6K3J66
-315@k6k68m9J91Lj42J3J2MMJJJ20J21p2p3R5R5q8q9qqj3J30K5k15n1R2J02J00R9j39j86N4
-317a65L9j04O4O3J2J2J2J1m8m9M7r7o0J80Q1o3k2k2j02j03J15J16nmn4n5J8J8J21J20j42
-319f6j44J7J6N3N2j3j3j2j3m9m9P0P1l2l3L9M0q8q8j7j6P0P1kkM1M0NNn5n5O6O5PPj13j13
-321b38M6M6L1L1R1j47j57Q3L4j10n8Q5K5K5l7l8j6j6N6N6J12J11j51j52R6R6p3p2J7J6J7
-323a91J7lkO9O9jkp3p4R6R5K4K4n2n3n2n3O6O6j02j02J06J06j4j4l8l8L4L4QQo3o4J9K0J0
-325a20J0O4q1j43J44J96r1k51L7J81L6q0q1j7j7K0J9K9K8K9K9M1M1j26j27K1K1K1K1k0k0
-327a86N3N2r6r6P2P2K3K2K3K3q6q6j4j4j0j1O1O1%%%%K2K2K3K2popoL0L0j5j5q1k26o1K28
-329a84J98q7j18K5J19k4ppM5M3p4p6J12J11n9Q5R7j91j18J68J5j28N1N0qJ37J9k68j66J21
-331a19J20j66j20J67Oj38J6J59n0n0J07J07j08j09J0J0RJ0M0M0M0L9q6q7L4L3J4J4n8n8N9
-333a15N9j09j09L4L4L3L4M5M4p5p6qqO4O4j7j8N4N4j29j29Q8Q7p6p7R2R2l6l6l6l6Q7Q7q1
-335a19q1N6N5j12j13J66J64r8r8N7N8o3o3o2o2J06J06K2K1K2K2k0k1k0k1m2m1O9P0mj48p9
-337b73K09J21j65mJ39oj48o9P5L7L6p4p5J17J16j55j56J60J7j55J34J18j70j61J27R4n0M9
-339a12M9j05j06O3O3J0J1j10j10Q8Q7m1m1N4q9k7J18J8j26L6L7nmo7o8m2J02J02m2l5l5o2
-341c89Q3J42kj62j7N4N3J43%j39j39J17k8j40J00J78o3j68P1J23k2J5J5k5j68p8O7M9M8K8
-342b54K8K7K8m3m3m2m3P4P5mj48qJ35N4q9J14J15l0j73l6l6P6P5p3p3M6M7QPR8m7j80l6M2
-344c09M2P3P4r5r5J16J15n2n3N0M9j52pL3L3m9R6R9m5j17K7Q5n9o4P9J06j34j34J06J9j26
-346b89J0J54l8l8M3M3POo5o5O4O4n6n7M6M6p4p4M4M3J64J63j30j29L7L8j00j00J9K0R2R2
-348b0K0J8r7r9k7k7K6K5K6K6K4K4j44j43J02J02j8j8K1K1K1K1J3J4j07j06R9J00k0k1M4M5
-350e5k8k8kkkkK3K4m9m9O7O6j02j02O0O0j1j2k3k2q6q5K7J71J41j47p3P1N2r1K0K0J1J1M2
-352a05M3p8p7M4M4k8k8K3K3m9m9N3N3j99Q9K46m0k00Q8R6m8N0N0j59j60R6R5kj46p5K14K29
-354I3j0j63j9M7r7r8M7P3p1o2Q2L3L2M2M1n0n1K2K1j18j18N0N0N9O0j2j2n6n6J03J03N7q5
-356f3r5M9J00m4j16K8P1p3o3Q0O1O1m1m1j38PJ35rj24K0R2n2q3O1k9k9P9P9q9q8O3O2P2P1
-358A4o8P4J44r6k86m8K11K10j48j47K0K0l4l4J34J33m2m2m0m2P7P9m2m2RJ0j10j11J4J3J4
-360a56J3k6k5R4R5l7l6l7l6PPPPK0K1J2J1Q3n9p0P5N4q7JKr2r1k0j9Q3Q3l7l7QQo4o4Q5Q4
-363a33l6l6j8j8J03J02r0q9j7j8j7j8N5N4q2q3J33J34o8o8o7o8J5J5J6J5k7k6R3R3m9n0P0
-365a80P0kkp4p4j4j4J05J06j79j79J81J80r6r7K3K4L6L7l5l5RQRR%%P2P1k6k7k7k7o1o2J07
-367a64J07llp5p4J38J37J8J8j32j33M3M4o6P9J46r2j35J06J76o2j56Q3R4m9j91m7J27J25
-369E9j36j38J18J16p3k19K5K63P6j64k3J19q6q7R0Q8p1p2RQr4M9J30j4q9N6L7L6K5K6r4r5
-371a25j5j6oor3N1J80L5p6O8N4j83j13J26J92m7j11L2L3j12j24J17J94m6k12K7J46r3j37
-372b60J03J03j37j37J04K5K5KKKKl9l8Q1Q2p3p2RQj8J26J5j30QJ52K3j21m9m9J9J64J5j29
-374a82jJ44m0l9k1k2p0P4J43r7p8J63J55J2Nj40j57j4J44jl0l1m8m9J19J19j23j24J41J39
-376I1o6o5N2N4q9r1L9L9j28J7J84M0n8n8J00J01j45j43K4K3N1N0j64j66J36J35l2l3JKl5
-378a34l5J15J13P6o9l0l1L3L3K4K5oj49m4R8Q8j52j18J22K36mj46jQ8j50j64P6P9o5POlk
-380h4N8N8j4j3r5r6n7Q7O9O9J5J4j41LJ31j1j49oK01N8j37j37P0O9q2q3Q6Q5l2l1M0M1l0
-382d4l1M2M1n6n7O3O2k5k6L6L7M8r5n2n1J1J2M8M6j2j4Mj40K6J69Kj40pJ36N6q8l7l9K4K5
-384b6P2P4r4r3J9K0K0J9q9r0j2J32J8j27m6R8L2L2NNo6o7q7q7N2K92R8k37r4J46L5j09Q0
-386g5Q0r6r6O3O2P9o2j37PJ66K1MMonk9l1l0l1K1K2K1K1q7q6L3L3J4J4L1j12jJ43O0q1M1
-389b5L9m8n0J16k7l5J07J2j30n1R2j8j9o7o7n1J89J25j13r3N1m5m5j7j7qqq3O2J48Mj22J17
-391g7N8j83k9L06M3k93M2K82j38j37R7R6j51qJ6J6O0O0j28j29J83J82j58j56J16J15k13p1
-392a99J55J1j34J0Q9Q7L9M0l3j75q5J56J19j19l3J10L4j10m2J01L0j14o0Q4L4l8M3M5l2l1
-394a8l7l7L6L5J4J4n7n7O4O3n4j27p9O4N1N1N8N7o0o2K8K8K7K8l6l6L5L4j16j17J48P6j20
-396a02K4J00m3j46kJ16M5j8j9k3k3klJ08J09Nj38j48mR4n0n0R4N2r2k0J24n7k02KK42J15
-398H8j23n9Q5J3n7rqqrqqnnO7O6l7l8P9J53q8k30j1j1j13J27K73o2k52Q3J89m9k13K6J29
-400b5j4q5j2O3O3k8M2R3n1j83m0J28j5j39NK8m5O2O2j10j11J47J48o9o8J17J16j45j47R7
-402a16R6p2p1K8K9m3m3M5M5M5M5n4n5J8J7l8l8J30J29j28j28Q7Q6j58j58J05J05J6J5n6n6
-404a73NNNNMLP5P5n5n5J7J7j01j00J63J63n3n1J9K0r5r4P3P3q1q1Q7Q7m3m3m3m3J09J07n8
-406e7n9m8m8K5K4K7K8K7K7J3J3J3J4j24j23M4M5N4N4N3N4l7l7L4L5j13j14m2m2J26J26r0
-408i8r0J02J00j8j8k2k2r3r4J21J21j91j92J65J64lmk1k1k0k1J23J22kj46p2P3P2p1q5N9
-410h2O0q5q2O3k8k7P4P5m6m6M5M5k7k7O7O7O7O7j85j87j8K20L6j08j3j2j00r9J16J17l2l3
-412a18J20k2l6l6K7K6M4M5p5p5qpO4O3ooooq3q3M6M6j17K7J55J2j13L2O1O1o7o7N2N2o2o3
-414a23N7N7r4r3j5J29J15k8j00M4N2r0r1N2O6p9J2J1j5j6M7M8J22k0j48oJ17k6j58Q1J19
-416B7j19J2J55o3k06O6K09j05j07Q0P8j05L7M6r7n8Q6P6o6m0m0O2O2P2p0P2P3N3r0j20j21
-418a41k8J16L5L5m1m1o0Q5K8j17J3J55l2l2M8M9n6n5J05l7q2O0N2r1OPj2j2Q4n7o7P6J8j25
-420a14o0J80R9m5n9n9p6O8J36j02k04L6J93M7j70k7J41lr0N3J13j25j29J12N1r3o1Q3j7j6
-422a38J57J4k10o7J68K5r6M9L9j04l9J06J46r2j58j5K05O0p3p5J34j0j29J4NMJ4J3n2n3K0
-424a38J9J9J9J9J9k3k3k3k3M9M9k3k3J0J0RJ0N6N7K6j16r1N4L5L5onnoM5M5L6L7k2j65j48
-426a82R2P7P6k8k7J2J3J2J3k0k1j09L3R2n1j78O2K01N7o2o2l4l4J33J34j90j90P4P4o5o5
-428a63J03J02p2p4Q5Q4L8j05j77l4J24J22l4l5m7m6m7m6M0M0M1M0j%p3p3O7O6j4j4J14k8
-430a7j58j4J78L3j34J0L4j10l8J06R3n2L9L7k7k9M4M2k2k2k2k3M4M3p5p6N9N8o0o2N5N5N4
-432D3N5r9r9k8k8N9N9j3j3MLMLK8K6j39j41P7P7m3m3J22J20m6m7J1J0J0J0L4L5L4L5n3n2
-434A5M4j00j13J28J26j12MJ48K2j22j4J30m7j91L7L7m4m4Q6Q5l3l4r1r2J23J23n8n8n0n0
-436a45O3K06J2k27j05J35J37oQQkjo1n9J1J2M7M9p1p0J7J7j03j03L1L0L1L0K0J9n2n3J10
-438f5J08j05j07J0RRJ0pqO5O5j04j03J99J98r4k38m4J97M0j98p9J61J90m9j62P7J06l7j03
-439e9M1jj45j6J27n7n7J20J19m5m4K6K7K9K9r0r0R1R3j23j23J09J09n9n7o4o5J04J03k1j9
-441hR8J00j17j16N1N1j23j25R1R1o9o9N1N0qrrrJ3J2q4O1R1j46q2J59P8j60k9J15m1j85n6
-443c33Q8J27J26l1l2P6P7j85j87Q7Q8Q8Q6j20j21M8M7ononJ0J0J0J0M0L9l2l2n2n2O7O8n8
-445f5n9O2O2p6p5J40J40j29j30Q7Q5%%p2p2L9L8q1q2J36J35l2l3n2n3J9J8q5q5Q2Q3jjJ17
-447F0J19j03j03J7J6LLLLK1K1r8r9J13J12j03j03N1N1o9o9L6L6l6l6O1O1n9n9K2K3K2K2j5
-450g6j4j0j0%P2M9r3nJ37L7k03j69J67J13j27l5K04j6k56N3J97k8j72Q6J57j9q9k7k6m9R6
-451e6O2q0q1O3K5j18OJ50l2j04K5R7L7L6p8p8M2M2l0k9K5K6m6m6M5M4M5M4o8p0N1N1m1m0
-454h1m1m1M5M5k7k8M9M8p3jrj52M0K80P6k59q0J59J02m1j6j8j03j03k5J19J40kj73j02J03
-455a69L2q6N8Q5n9j04J36O3O2r0r0L4L4q6q6O3O2M1j03j41J46K26o0k19O9J47Lj41LQ1Q1
-457ho2o2J0J0K6K7K6K7o0n9J2J2k0k1k1k0RRJ29J28o0n9o0o0j2j1O0O1j0j0j0j0J0J0J0J1
-460d8M6M5j69j70J93J91k0j64j32J57J64j22j61J28K34k44k36N2J57J3M0M0m1m1N1M9o9o9
-461a26J1J0J1J1j2j2O0N9J4J4n8n8k6k5R5R3j23j25R2R2m1m0L1L2o2o3J0RR1R0p7p7N9N8
-463A7o1o1N9N8o0o2L9L9O2q0q7J52J52q7r8M5n0n1L3L4m8m8M0j03l2J13M3M2rj1j28J5J35
-465Bqp1p1P8P8Q5n8j39MJ26j6q8N5J25j8j76l3P3P2J1J0l2l0l2l1J9K0J9K0P2P2nj48j04
-467a19L9P0O9j4j4j4j4q9r1J65J63l0j74P3P4m7m7m7m7N6N4j6j5O4O5j7j6M1j02j71O8K01
-469A18l9r7M5O5p9j3J32Lk35k6K13O6j73j05L9N2N2J45r4k28J08J84j50j37J98J33j07j54
-471h4j1O1O0k5k3M6M8j75j75J85J84p3p2R4R5j48j50J15J14m1m1L0L1k7k7M4M5n9n8O0O1
-473H4k4k4k5k3P2P3r5r4J3J3n9o0RQQQl1l1Q9Q9q1q0L9L9M5M4k6k7j0rrrj8j9j8j8j20j20
-475c97J92J91n2n2O8O7m5m6K6K5m1m2L0L1j3j3j4j3P6P5m4m3m4m5P6P5j6j6j6j6l9l9Q1Q0
-477D7p5p5M4M4m8m9K3K4O5O5j01j03Q4Q3q3q5L7L6q4q4J27J25m1m1M8M6p1p2J10J08n9n7
-479a2k9l0k9k9L3L4L4L3p8p9M1M1J6J6J5J6KKKJj5j6j6j6lkJ77j09j89J00K19o8j83J05K14
-481A98p3j34Qj9j8O3O5n6n4k4k4M8M7k9l1l0l1M8M7M7M8j8j7q8r0N6N7j6j6l3l2L6J80Q1
-484A96k06j16K7lmNNN1M9k1k1l4l4L9L8J1J1o0o1O1O1j0j1J1J2J1J1j0j0O0O1o6o5L1j10
-486i1n8K29J40mr1r1k8k7j1j0O0O2n6n4O3O5j45j46J18J17m0m0P8P9j07j06K3K2l4J10J80
-488B07o0k70l1J73K9o0Q3P4p0M7M7q3q2opj7j6M2j00n0J89J58q1q5N9J3J2n1n1m7m8K4K4
-490c4k9l0R1Q9J7J7J7J7j20j19%%llklk7k6M5M6j8j8PJ49R1j49j54Q4J76o4k25J4J85M2l0
-492C3l0K0J9K0J9r5r6P2P1J4J3J4J3m4m3m4m5Q2Q1q5q7P4P2KJj7j6N5N6L1L2q9q9j7j8P7
-494E6o5j35J05J62J8q1p9K9L0onoon4n5N6N4J7j27k9K10l5k74N8K01j66j68K50K48k12k12
-496b21J08J08j54j0P8P7R1R2j24j23J7J7j36QP3P2Q1Q1j39j40K8K8J8J7J7J8J0RJ0J0m0m1
-498f0j2J32Qj35j6J27O3q0RRl7l7L3L4p7p9M2M1M6M6k6k5j60j61K33K31J2k27p5J65J27j12
-500C9k25J3J05l9l3J11j7j60PJ52J04l9K7j15j65P5J80L6q8q8k6k5P6P7MNp5p5m5R9N7q7
-502a35K7J70M6j93j28J12K00m0r8M3P1p4p3P1Lj38P0O9noQ3o0o8P4P5o9m4R9k0j64K3J67
-504H8m3m3k8k8n9J81J07j32J8J8j65j66J54J54j75l3K39R6k87j44J26J25RRRRj3j4j2j4K9
-505A5L0L0L0j11j12J6J7o7P6Q5n7L5J77J1j33q8N5M7r7q7q7j8J26J53J1j48mJ54J56j00r9
-507A6O5O6pon0n1K2K2l1l1l0l1K7K5r2r4R1R0p6p7J34J34q2q1N8N9j08j09K7K7j35J0J95
-509b3N0j22j23J42J41k6k7qpqrnnnoJ3J3J3J1MLMLo4o6POpoJ12J14q1p9Q7Q8o4o4o3o5J06
-512a6J04j09j11J77J78j82j81O8O7j43JJ92M9j15j16o2Q3J20J21j12j11N6N4NNmmL5j08j09
-514a68L5L9M0M8M8q7q8J69K6j64k1N2r3L2J74Pj35JJ44j11j13M2M2l0k9L6L6L6L5rj1jkq1
-516a01O3P7o5o9J71N2j88r4N1O5O4j4j57j61J75J46r2q8J53J04j34j38OP6P7P2j65k35J00
-518b49K09l1l9J06QRQ9Q9j27j27Q1Q1q7q6P8P9m1m2j27j28J36J35m7m8K5K4j3j3j3j3P0O9
-519E7j45j46P8P8NOOOo6o6K6K5K6K5R8J00o9o8%J%%l9l9L4L3K0J8r9j00R3R2p5p5N4N3N3
-522@N4k1k1k1k1k9k8k9k9N2N2o8o7J21J20r4r5mmnmJ3J2J2J3K0K0K1K0j0rj0j0KJKKL1L1
-524B0q8q8J9K0R2R0l9l8L2L3nonojjjjJ0J0KJQ2o2j96M4J74L1q9q8j3j4O7O6j08L6K17k1
-526A76k36r2P6P6j0j0j0j0KKKKM1M3j10L4N9O0n0n0J3J4J4J4o7o9J0J52k7j70kJ40M3r9j0
-529d9j1K0K0L6j05j18K5J04J03K9K9K0K0j9j62j06J34Q1o2m7R5j1j2klP0O9n1n1J1J1o2o0
-531e4N9O0j01M2K7j16N1J94n8k01O3K05j0j54R5R5n0j92q3O1R8m4j17K6J04m1m0J02M3r9
-532c5j1j0l1l0K38%k68k9K70J27k06o1J6J6o6o7J41J39L5j09j16K6P6o6n8Q5M5M5j8j8l6
-534B4l5l6l6L2L2m0m0N0N0o9p0O6O6O6O6o3o2N7N7k9k9k9k8rj0q1q2J31J29l8l8L0L0K9L0
-536A21j67j68J43J43kkjkl8l7l8l8J6J6J5J6L3L3L3L3jjK5j18j26J60J71j18k17O9R0n2M5
-538C6M7q3q1J23J25j40j38J43J44k1j64j25J62J64j25j45kJ9J9N4N5j12j13M3M2j37J50J35
-540G5j52q0K06J28j61o0Q2m9m9P8Q0J2J1J2J2r2r1P5P7j20j21R5R4L3L3L4L3j04j04o5P8
-542@L9L9o2o2m7R5J06l9p1P2O3q0n1n0LLP4o8p7O6O8p4OJ49K4K4M2M2j46kP9o5j46mk2k1
-544i3O8O8j0j52MJ47K7j15m1J02R4n0o1o3Q7Q8M0j04j12L1O1q1rJ33k5j69m0J04O1O1m9m9
-546d7R8R8J2j33JJqqK0K1n2n0J0J0R9m4n3Q9Q1o3%%N4N3l5j78l2K08J69p1j28j27j84m0J91
-548c8J90n5n4m5m6q1O3qrn1R4Q3Q4m4m4K8K8k4k5O6p9l3J11rj53k3J21qj51Q8Q6POo7o6N
-551e3NK1K2K1K1r7r9P0O9K5K7J16k8j25J8J44r5j70k6J73L0j44j45O2K05J04j35j41R9J86
-552A60n3j99n6Q8Q7J14k9j66k4N5N4ppp8p9k3k4k3k3J58J57n8n6k7k6M6M5j9j9N1N3n0m8
-554b6n0m9N6N6N5N6m1m1m1m1J6J7J77L5k08o5J09J09l8l8l9l7m3m3j3J31R5m9j11L2j0rj
-556d9jj5j5j5j5K8K7j35RJ73K7j56Q2K62p3k89M7J85n4o0Q3rj52p2P1P3P2l8l8J2J3r3r2
-558b07J6K55R8j43r3N1M4r8J7J60m9m9mmj9j9M0k01j08K29J64j69j65J71J37j02j00M4L0
-560g4K9l4l4L2L2L2L1N1N2k1j64j51Q9J07l7l6J08R9m5n4n4QQl3l4j15K9P2P2q8q7J19J19
-562B8Q1o4l7l7m7m7kkO4K07P5k60k67O9K07l3p8O6opKKj6j6j6j5Q6Q6Qj34n0R4Q4n8%JQ0
-564D8o1o4P9Q0o4j55j1J8J8O5O4n4n5N1N0k1k1j4j4j4j4J8J7Q8Q9j16j15N2N1K9L0m2m1l1
-567f0l2M1M0l6l6l7l6J0J0J0J0L6L5L6L4L7L7q3q2J4J5J4J5j1j1j2j1LKKKn7n8O2O2N2N2
-569F9j15j16J35J33l3l4J5J4J4J4RQQQl1l2M0M0j04j03J11J12m2m2m2m1J07J08o0o0j2j2
-571F6j2j2m7m8P1P2j4j4j4j4L9L8l3l4Q7Q6j30j28k3k3M9M8OPPOJ%J%n9o1N9N8N6N6j03j02
-573e8k2J21J22k3j01j01R5R7r0k33K2J65O8p3n7n7J22J20L4j10J7J6o5o3N4N4o5o5K0K0K0
-575a6J9n5n5J7J6M7M6k5k5j%r1N4J77L3r2r1k4k4R5R6r9r8J16J17p4p3M5M7o8o7N2N1n9o0
-577f9O9O8j04L8K07O3j17j16n2n4J31J31j33j32K6K7J7J6M6r8l5J08J05l9k0k1o8o8LLJ01
-579C3J02j14j13l8l7P3P4P0p1q2O3N5q6p9O6k3k4N8N8QPR9m6j12L0L6j06j4K24O4j75j45
-581a45R4J7J7M2M4p5p7L6L6l6l6p9p8J38J37o7o8J3J3l5J09J04j33j33J06J17k5p4O9R6m7
-583H0p6p4Q2Q4n1n1j5j6M4M5k7k6j9j9j9j9N4N3j8j7m4m4L8L7j17K7J61p6r6M8K4K4L9L9
-585E5l3l2r0r0P9P8o4o4J04J03j18j20R7R5K2K1p4O8R6j42q1O3k2k3N9N8j31j32L6L6m2m2
-587b30J26J25O3O3j05j04m6m6K6K6N3N3j8j9N8N8j3j3L2L2j36QJ49r1k57j9J47KK7K6q5q5
-589a93J31J30mlm0l8P4P4r3r2J09J09n8n9J6J5k0k0mml9m0J08J09j07j06R3R3p5p4K6K6R9
-591A43R8r3r2k1k1k4k5J1J1o2o1N8N8j09j09O0N9L6L7L6L6o2o3J04J06l4l3o9p0J25J26m2
-593A14m3q7q8L2L3O2O3rrj28j29Q7Q8n0n1P0O9L2L2nml0l1j01j02J10J09n7n8J01J02o7o5
-595a0J37J38j74j74J02J03j13j12J53J54j58j57R9R9o8o8O0O0j1j2J09J09j55j54L6L4L5
-596F2L6o9o7LMk4k4M9M7j6j6j6j7M6M4p4p5J16J18n1n1m0m2L1K9pqO4O4j01j00J9J9noO5
-599GO6p2p0R5R6RRj59j59O0O0N9N9NMMNo5o4QPo9p0J47J46k4k4k4k5l7l8l8l8Q4Q3m5m5P4
-601B1o8j38J03K06l3j30J2j3j4NNm9R4J57q2j34RQ0Q1j8j8j8j9k5k5M5M7kkjkL5L4q5q4L8
-603A2L9q0q1PPJ26J27r5r4P2P3j17j19R8R7JKp0p0P3P4m7m5M9M9r9j00k1K66J56j32r8M5
-605A05K7j17J0J1JJJ6J7Q8Q8j39j38P6P8j05j03O3O3MMMNmlllonnnnnnnJ6J7J7J7n1m9J8
-608a0J62J13j75j83J04K50l9j70j69Q6Q5J4J4j04j05J12J10m0m0l9m0N6N4j6j6J0J0J0J0
-609E4j7j7j7j6JJJ20J21j63j61O2O2m1J01J29j59j38J48M9r4k1k0rJ35J03j84j20J65R2j95
-611b9n9K29l8l9P8o6k25O1K77j1r5N0n0n0k6k5m5R9O8p6o6P6J3J4L1L1j13L2K2K2J1J0o1
-613E0o1K8K8n1R0M7M6N5N5j74j74M2M0k8l0k1k1L3J77Rj35%%rrkjPPm4R8J08l6j06L8L7j05
-616a2K0J65r4r2O6O8o2o1J22k2j89m5J48J49n7n8L3L3q7q5LLLLM1M0M1M2j32j33L5L5j5j6
-618a10M8M7R3n0n8Q4N2r3j9J22Pj37n6Q6J2J2K1K2n4n3n4n4J65J67j54j54J37oj93M5K29
-619A04j0j70O8M5r7POk8J15J13j27j31J08J11l3J0Rj61j7J70K7r2N1mj46O2O2j05j06P2P1
-621a6r4N0K16P4j81j81K6K6Q7Q9N8q5j26J6Q2j57j38J99J43r5n9J81N6j84k3J20J6J6K9j15
-623C0j76O2Q6n6L9L8O6O6non7n6j27j28J84J83q1p9O6O6nok2k2k2k2K1K1n0n0L9L8N8q7o9
-625f3P3P4p0j45kJ23J23l4l3J19k5j70j72Q3K27J39j00j57j3KJJ30J30k33k32J42K86j01
-627A02j01K14P0k38r2J12l0J6J6PPJ19J18j93j92L8L8KLJ9K0J9J9M0L9M0M0j16j16m3m4N6
-629a1N4N5N5j08j07J2J2M1M2M2M2RQj59j60J90J91p2p3k3k3k1k3N4N5J8J9j01j00J15J15
-631A48o9p0R9R9OPl0k9r8r7K2K1KKP4P4k6k7k6k7N1N1o9o8K1K2N8N8p3p2M7M7m5m5K8K7K2
-633A15K2n0m9P0P0j46j45J35J36l2l2K4K3K3K4j01j00l2J11P1k16n7K29K13p6k34N2N0r3
-635Ek0k1j20K5K43m5j96R0J59j28r6J42J08l7L0K9j70O7K32j04k59k0J75L2PQm7m8l8l7%
-637c4J44J98m1j48j47NNP7P7M7r7q1O3k7k6R8R9J1j33j0j1J6J7l1l0J5J5r6M5J28j6j24K1
-639B9R2n2K0J65j3j57%Jrqk8k8m4R7L5j07j9j9j2j3K02K04j41j40J15J15o2k06r1J47O8O7
-641B08k9k9k5J19K0k20j19J20N1r3P2P1j8j8P6o8m1J03L3j11J6J5k1k1J42lj14L0J3J2k8
-643A43k8o5o3K1K2l1J11J2j30kJ41k8k7j8j9M3M3p7p6Q3Q3J1J2OPo5o5PPQPl8l7L3L5J3J4
-645I3J3J4m0m1L2L1k4k4k4k4O7O6n4n4L1L2L1L2m8m8K4K4n4n3J15J14j76j76K31K32j45j45
-647E2K3K3J5J6J6J5n9n8O1O1j10j09J15J15j01M3J19j22j29K06Q7k49j10J29j7j60J21J20
-649A13o2Q1K15j22k95M0J58q1p8O5NOK3K3o6P7J40r9j96n3J9J9N4N3j8j9N1N0j16j18K12
-651H1K12j95j95J06J07j3j4K9K9j00j00K13P0o5o5KKLKk9k9M3M3n1n2K1K0MMo8o7P3P4m5
-653E0m6M7M6m4J01lj47K0J65j7j61N8N8j33RJ99m1k23J6J35j03j24J17L7L8J2J2p8O6N7q7
-654C6j5J29L9j06j6j6l2l1Q7Q7M5M4j15j15k6J17L6L7j05j04J00J02K0j25m4m3J4J5J4J5
-656D4l9l9K4K2N8q5k9J14O4j75qK31n5j98P4P4j44%J75L2j60j7N4q8J3J56n3n2J00J00p7
-658A16p6J13l0j49oL9L9M0L9J9j25m4m4L8L7l3l5Q4Q4J3J2L1L2m1m1j5j5j5j6n8o0O0N9M2
-660I4M3l0l0j2j2j2j2RRL1J04kj46q3J55J04l9o0J1K3m8n4J9O6p7q1O1J57J4o5o5o5o4J02
-662D5J04j0j0L9l2j81l9J81L8j44kJ21M9o4Pj3j57j9K19M7r8J1J54j09k53L3J76Qo4J2J2
-664F1j0J33j0j54l3J09J31j4j30j29K5J67P0j70j28J11J24k1r6M9J66R5j92j91O7O7q9q8
-666h0J69J71l9j10q7N6J58J5k93j49J62Q8p6O6J89n1j56j2m0m2Q6Q7n3n4J9J8RJ0o2o2J20
-668E7J21KJl3l3l4l3jkP1P0r6r5K3K4L4L3l8l8RJ0RJ0LLLLO1O0o0o0l5l4Q5Q6j8j8j8j8J8
-670A32J8j50j49J39J39p7p5l1l1Q8Q9J4J4Q6Q6q5q6j4j4Q6Q5j31j30M9N0k2k3r3r4J21J21
-672A12L0K9r1q9Q4Q5J3J3l5l5l5l5Q5Q5r2r2O3q2j43R5R5m9l2J10q6q4R1R2j3j3j3j3o2o2
-674g4N8N7K0K0K1K0j0j0rj0m1m2P9P9j3j3j3j4j0j0O2O2o9o9o9o8N2N1j9j9O1O1n9n8J0J1
-676B5Q2Q2j14j14N2N4M4M4k7k8n9n8J3J2L5L5q3q5L3L3L2L3pqO5O5p1p2M9M9M4M5j24j23
-679d7L0K8L8L8n8Q6J50r1j64j9N1N2J06J06j10j10J5J5J5J5p1p1KJj5j6N4N6M7M7p3p4k5
-681Hk5kj45pK33J05j35l1l1m6m6J17J16n1n1P8P7m3m3L7L7L7L6o6o6NON2N2k0k0p8p8R0R0
-683A92n4n4R9m5o8o7lmJ30J30j33j32j0rk8J15J09l5N5N5j28j27Q7Q9l8l8L4L4l4l5l5l5
-685A7L4L4o1Q2J65p4r3N1mj48K9J73m8m8L3L3l3l3j05j04J56J57j07j06m0m0L3L2K5K6K6
-687F2K5r7r9K13K13j26j27M2M1m6m7o4P8P0p4p3O9O2q3q2O0O1q3kJ41K9K9l3l4JKJ9j25k8
-689fJ15K5K5MMnnL3j12j11L3k7k8J01J01J2J2J1J2j19j18R6R7j29j28J33J35q6q4L3L4J8
-691G6J8J08l6j50oK4K4N5N5o4o5R1R1l5j80k8J14K5K5j6j6j05L8R7m7m8R7J08l7j14j14L4
-692A9L4l8l7J23J24r2r2M6M6p4p3J14J14n3n4kklkmlP8o6l2l2l2l0L0J76Pj37k7k6P4P5R4
-695B43n1q9q9N7N8Q2o2j94M5K62K1k24p9Q6Q8J9J9n3n3K7K6l6l7m2J02J11l3j39Mj3j4Q1
-697A23Q0q8q8M8M7L8L8P9o5q1O4J10j30j36J04Q0j59k8J17L7j07J03J02o6o6N4N4n5n6M1
-698A94j04q5J55K1j24J4J4r6M7K14j22k53Q2K03j33o5J72N7q8RRL5L6Nj38l5J09L7j07p9
-700a6O3M6M6n9n9O1O1kkkkJ7J6J7J6m2m2j31J2J81L8q2O2K9j14m3J01M1j04j3j4Q6Q6l5l4
-702A83KKppJj44k3J20n3n2J24J24p0p1M9M9k5k5r8r6O9P1r7r7J20J20l8l9j56j3J30J31r3
-704I1N0N9q4l6J09n9k02J26K72j79j77J71J72j39j40N7N7o3o3J6J7PPJ30j4j85J02K35n3
-706B84l07k1Q9n3M3M5m1m0J26J27j84j83P9P9L2L2L1L2%%r9M6J42j45o4P9oj50N9O0p1p0
-708d9JJJ11J13j03j02R8R9p7p8J23k1j11J77N2r1M6J91j66j66J07J06m4m5m4m5R5R5p2p3
-710A28j3j3j2j3L1L2m1m0%%%%K6K5K6K6q4q2L5L6J8J8J8J8k9k8k9k9K8K8K8K7M9M9j19j19
-712eK0K1R3R3p2p2%%j9k0N2N2o6o7ONL2L1o8P6J92r7k15P0K00N7o1o1q3q2rrN5N7J8j25O7
-714F6O9o0o0P4P4j36QJ14k9l0J15J7j27KJ46k7k6Oj37j52Q8K06l3o8P5n0j94O0K04j02j01
-716hP8P8m1m2R4R4p3p4J8J7J8J8m7m7K5K6J4J5K4K3j22K1R1j50o5J74L3j10R2R3q4q5J45
-718B43J46p1p1n0m9m9n0J1J0K0K0n0R4L7j06m6J95K1j23J8J63oj49o7P6P7o7l2J11R9j41
-720B14j53Q7K7j17J3J58j01j01J32J32l7l6l4l4L8L8n1n0n1n0O8O9n1n2O4O3n6n7L2L2j00
-722C6M4J99m1j93m9M8M9N8N9KLLKK5K4J6J5J2j32j66P5K14k5j73k9O5O5KKM3M3l9l8M8r5
-724A72q7J54rj52O9K13j26k69R7K43l6l5o3o3K6K6j0j0O1O1k6k5J05j35p7J62K4k16NK46
-726C25L6j09p5p5L2J76P2j69kJ42p5p4KKKKL2L3l9m0%jl7l6L7L8l4l5M4M4M4M4M9M8p1p2
-728B60M5M6k7k7ppqpl7l7L5L4POP8P9r2r1j3J30o3k06LK43M5r9q5O0L8L7p4p4J32J31n1j96
-731B08O6O5o3o4R5R5j63j9R8m6j57j3Q1Q0J8J7l0k9N1N1o4P9J16k8n8n7o7o7J68J67m8m9
-732D33j1j1N1N2n9k02r8J42J54J1j49j49M6J91M3j97p4J67O1q3L4L4j1j1L2L2L3L2q6q5L4
-734C56L4L7L7k6k5q4O0P0p5j05L9J97N4j00r9o4o4K0J64m4j87L8J83J2J2J04m0j81N8J54
-736E35q7j23J17R4j46nJ39n6n5P3P3p6p7nnk9l0R0R1NMNNo4o5N5N6j2j2j2j2j9j9j9k0M7
-738D41M7M7M7n3n3n3n4R0Q9J7J8jjjjp2p1%JP3P3m7m7K5K5K5K5k9k9k9k9Q8Q8q0p9P7P7m3
-741F01m2J17J18r8r8M3M3M3M3J7J8j03j02o9o8J00R9l5l5L6L7n6n6O4O4k9k9k9k9J9J9J9
-743F22J9O7O8nno4o4N7N6n5n4O5O6q6q6Q2Q2j3j4N8N8j06j06J10J10L8L8q2q2l4l5Q5Q5l
-745H72lp5p6L1L0L1L0o7o7N3N3O8O8n2n2NNj9j64K0K60R2j48j45jk6k5J34J34l4l4J1J0o1
-747H58o1L6L7O0q3r6J44K17k4k12o8J48J48o2o1J0J0p7p8R1R1j0rj0j0l7l7Q3Q3p4p5R3R4
-749A119m7m6K5K6RQRRklp5p4J02J02o6o5N7N6N7N7j03j02O6O6j7j7j7j6J1J2J2J2J8J9J9
-751A221J9m8m7K5K5j0j0O2O3l3l2l2l2O4O5pqo4o4N6N5L3L2L3L2k6k6j7j7o5Q0jjR2R1j33
-753A375j33J70K6j64P7J17j22j77J59K11l0OPK1K2n1n1mmmmO2O2j1j0k0k0P0p4p0P4P5p0
-755A515o7P7O8p6n8n8N3N3N3N3j9j9LMLMP4P4m7m6K2K1K2K1j7j7j13L0K02l8j58Q1N1r3j6
-757A642J29J4j29J68J67p0k14L5L4j3j3j3j3OOOPQ7Q7m1m2J06l8j73O8J60J6j37QP8P9q0
-759A927q0J16J17j0j54l9J06J5J5RRo3o3M3M2M3M2m5m4K7K8j7j6j7j7M6M7M6M6K7K7q4q4
-761B045J6J60Q0P9n7n8j38NJ35J35j69j68PQj7J28J93m6j67P4J88M4k8k8j06j06J11J10j1
-763B419j0Qj37jJ43O2q3N7N7l3l3K3j21n9Q6J11l2N8N8n7n6O4O4l2l1N8q5MJ49Q2j57p4O9
-765B571O4q0q5N9R0Q9J0Ro2o2J10J10n7n8J9J8J9J9L8L8k4k5j30J5J44%j09L6J47KM4M3m4
-767B958j88j7J28J18k6rrj9j8O0O0P8o7j03M1K3K4%J%JP6P7nnL8j07r8J43Q5n9L7L7k4k5
-769C206R6R5j15j16N2N2K1K1K1K1q3q3J34J33j1j0j1j1L2L2m0l9O8O8n2n2QRQRJ02J03j7
-771C651j7n3n3J9J9JJJJkjjjL6L6o0Q4K49Qj53j0Q8n6n6Q8R0n4n4R1O3q1RRJ%J%L0L1L0L0
-774D015j6j7j7j7O6O5opJ8J8p8O6J47r3j02M2jjQPP1P1m9m9M4M5M5M5LKLLK9K8m3m4M7M7
-776D395M6M7n4n4O7O6j01j00J16J16l6l5L6L7J7J7J7J7R1R1p7p7k3k3M9M9k2k3k2k3J35J35
-778D874l3l3j8j8N4N4RRo2o3Q2Q2RJ0k4k5k5k4P6P6MNkkkkN2N3k0k0j7j7J04J03MNMNkjk
-781E262jk4k4M8M8k3k2M9N0N1N2o9o9N0N0N0N0k7k6M5M5K0K0n2n2R9J00k0k1m4m4K7K8O1
-783E687O0j1j1N6N6j6j6j1j1j1j1Q0P9PPk0j9P7o7n8J81J73o7n9o0kkM7M7p3p3J55J54j58
-785F110j57J66J67n0n0j4j5N7N8M0M1M1M1o9o8N2N1l0l1Q9Q9p7p6R1R1o3o3N7N7K3K4K4K4
-787F630kkP1P0p2p1M8M9J5J5J6J5j%jjN0N1k2k2Q8Q8l2l2RQRQM9M8k4k3N7N7j5j4K0K0K0
-789G177K0K0K1K0K0k3k2M9N0o8o8J01J00K2K1K1K2m7m6K6K6k6k6M6M6N1N0k1k1K5K5K5K5
-791G641K7K8K8K8m1m1P9P9n1n2O9O8k6k7M6M5l3l2L9M0M8M9k4k4J7J7J7J7L2L2l9m0O8O8
-793H152n2n2P7P7P6P7j23j23M6M5Q7Q6l3l3M4M5M5M4qpqqL2L3l9m0M2M2M2M2l7l8L4L5L1
-795H633L0m1m1J08J09n9o0R2R1k9k9K8K8K9K8MNMNJ8J8J8J8M2M2l0l0PQP9Q0n2n1O9O8J6
-797I255J6J6J6p6p6R2R2j3j3N9N9POPOl4l4L8L8M9M9k3k2MMMML5L4L5L4L6L6%
-800I740
##$OBSERVED INTEGRALS=	(X Y Z)
(1.3851092329388217106, 1.6849701356534239061, 1)
(1.6863310777232327631, 1.9698606756001271201, 0.95983721994642579034)
(2.2921162221516362401, 2.6887132048406847673, 1.9571924604890438282)
(3.6961974753814144101, 3.9275457152833608276, 1.0306931239989571836)
(3.9680583102892308389, 4.2463158707242909529, 1.6295835103988696169)
(4.4211597018022574801, 4.7260702852674949526, 1.0054750765399049772)
(4.8038971125156146869, 5.0459065616296312484, 0.33459478978114337577)
##END=	
##TITLE=	20190321 Organic Mixtures Sample 01.11.fid
##JCAMP-DX=	6.0	$$ MestReNova 14.0.1-23559
##BLOCK_ID=	5
##DATA TYPE=	NMR PEAK TABLE
##DATA CLASS=	PEAK TABLE
##CROSS REFERENCE=	NMR SPECTRUM: BLOCK_ID=4                                     
##.OBSERVE FREQUENCY=	400.13120039000000361
##.OBSERVE NUCLEUS=	^1H
##NPOINTS=	35
##FIRSTX=	1.628164701619471133
##LASTX=	4.9202445894914346169
##XFACTOR=	1
##YFACTOR=	1
##FIRSTY=	127.26709730028048284
##XUNITS=	PPM
##YUNITS=	ARBITRARY UNITS
##PEAK TABLE=	(XYW..XYW)
1.628164701619471133,127.26709730028048284,0.078719051719352034491
1.6391237058251901804,5676.1129596743694492,0.0053875273413922951035
1.6550975365156550545,4102.4475266131876197,0.004933133980618856218
1.657461378440278299,8118.9452605547394342,0.0038948942915232017195
1.6744820968821154672,6037.754875306656686,0.0039956703693351273629
1.7061918631004824309,5909.5093297711282503,0.0050169857087372458221
1.7223111403802329189,4372.7756246296921745,0.0043227312111228516356
1.7250027998986519062,8987.4740264205611311,0.0038514415782798638171
1.7421187688898209789,6263.6573646377109981,0.004776447294320817355
2.4769996708496218041,666.59050794938650597,0.03315199901565939189
2.48925354398811427,5155.4746341800009759,0.0054057169742063983578
2.4920368988374108632,12530.22872185930828,0.0049485783300354186168
2.4997002653121542792,3008.5522908711541277,0.0029274651385064213646
2.5026132640523326423,16613.140504407907429,0.0050838802634151887896
3.8156717852976242966,272.34768795660255591,0.040439106569225918841
3.8290358528753003498,9469.3829435993538937,0.0062748953582763842066
3.8424196624933686373,10095.950896528134763,0.0044940005525667707162
4.066024537560450014,1144.8722230023247448,0.0053955862071043058856
4.0786212036680478121,1075.2470188387326289,0.0065195810906199091334
4.083738314791589552,2753.1932185170867342,0.0052110341164123092847
4.0962749950132089083,3109.654984351431267,0.0060093187946492739385
4.1015433590223127069,2363.7905191873392141,0.0040622436654349936697
4.1163599847197342996,8091.5150040293392522,0.0072308058002284545523
4.11982032066281878,13490.288521661257619,0.0044510868235567574436
4.1318760600187278698,1061.0233211608015154,0.0036952021910271531588
4.551469385853644134,2219.5161567030154401,0.0049375278200430973777
4.5693077452222796708,5617.3535582707800131,0.0050798841318445628334
4.5766768070842314131,641.62189112651549294,0.0041359833023835793075
4.5879242120040544251,7224.488105374425686,0.0057710753152526109849
4.6023850068210823139,2565.9981634165533251,0.0051604189005530435447
4.6056342087199038104,2487.9767723978970935,0.0040733896036232826107
4.6155495279980245371,849.49971467025829952,0.0058720224521776843637
4.894734848114827841,1787.8457959867002955,0.0058270231443074095232
4.9074416719156381816,3276.4714067942350084,0.0055278019292665653284
4.9202445894914346169,1625.2502435577948745,0.0057282472385023564324
##$MNOVA/PEAK_DATA_TABLE=	(T,F,A,ST,SP,APT,APC)
$$ Complementary to PEAK TABLE
$$ T: Type
$$ F: Flags
$$ A: Annotation
$$ ST: Shape Type
$$ SP: Shape Parameter
$$ APT: Attached Peaks Type
$$ APC: Attached Peaks Count
Compound,None,,1,0.22420832265274620587,2,122
Compound,None,,1,0.14411634599748973651,2,110
Compound,None,,1,1.1959578345464667581,2,80
Compound,None,,1,1.0819857366114320474,2,83
Compound,None,,1,1.6124050109094665295,2,66
Compound,None,,1,0.98744216270881191022,2,83
Compound,None,,1,0.29838558887220556493,2,96
Compound,None,,1,1.1913396027499696395,2,87
Compound,None,,1,1.3882812551260661493,2,94
Compound,None,,1,-0.48889674881698613751,2,149
Compound,None,,1,0.028391274612933448118,2,71
Compound,None,,1,-0.55844027538771290331,2,190
Compound,None,,1,0.80422306489568584631,2,12
Compound,None,,1,0.31372263360066460214,2,126
Compound,None,,1,-0.48796108393171172546,2,99
Compound,None,,1,0.38856337028764204033,2,158
Compound,None,,1,1.0780490875305148712,2,92
Compound,None,,1,0.024696552777023872416,2,49
Compound,None,,1,0.41817002079225890077,2,42
Compound,None,,1,0.045090037248540382198,2,70
Compound,None,,1,0.76233401736264694293,2,54
Compound,None,,1,0.68714200015765114493,2,30
Compound,None,,1,0.32342221886796945762,2,164
Compound,None,,1,0.61306380952154748698,2,132
Compound,None,,1,0.67468003862733838538,2,30
Compound,None,,1,0.44227991633976898589,2,84
Compound,None,,1,0.94332005051077683078,2,126
Compound,None,,1,1.2445061353755375588,2,18
Compound,None,,1,0.47867800412084654527,2,180
Compound,None,,1,1.8744897531800250867,2,62
Compound,None,,1,0.87344402803555931669,2,75
Compound,None,,1,1.3915579916110503156,2,45
Compound,None,,1,0.60245279803224804915,2,64
Compound,None,,1,1.1952895653187982639,2,94
Compound,None,,1,1.8235860890203583473,2,57
##$MNOVA/ATTACHED_PEAKS_TABLE=	(I,X,Y,W,ST,SP)
$$ Complementary to PEAK TABLE
$$ I: Attachment peak Index
$$ X: Peak position
$$ Y: Peak intensity
$$ W: Peak width
$$ ST: Shape Type
$$ SP: Shape Parameter
1,1.8551710569754997771,-4.0181325461258969867,0.00076269157836203233143,0,0
1,1.846081072791028177,-4.8980485278642653668,0.0013728448410516582399,0,0
1,1.8132234445825878844,-2.5829099212994424128,0.00076269157836203233143,0,0
1,1.7792709684559591121,-1.0183351959465247738,0.0024406130507585036341,0,0
1,1.6822064265229044189,-3.83088281162691624,0.0019841057086592488005,0,0
1,1.6270214584676230274,0.84021297931831961936,0.0023060387683309828757,0,0
1,1.6200291795540537887,-4.5666900870405893187,0.0063809983839295718669,0,0
1,1.6142037957797406023,-0.776948930729669196,0.00076926825635205301011,0,0
1,1.6112974309086203206,1.4737531397086378604,0.0027834641906881035789,0,0
1,1.4060192754591178677,2.0295471231522950184,0.00061015326268962590851,0,0
1,2.0419565346279586748,0.31982068666904295284,0.013257731215952275189,1,-0.2000000000000000111
1,2.004370918693302972,0.62701627831133943669,0.01841088766891166642,1,-1
1,1.9557512774367011854,0.64807510045221872197,0.043191955088566130749,1,-0.80000000000000004441
1,1.9040177710667083311,0.51638576095423582846,0.0064284004461942715475,1,-0.36781065470800000661
1,1.8777779076733951413,1.295342634311349439,0.011268276071924456655,1,0.12066074569667595284
1,1.8626131086677033544,-1.6426524834644333772,0.03153149891905025759,1,-1
1,1.8551860028350477538,3.1658903735338235208,0.00068841140342776221787,1,0.77031027513752148295
1,1.8517002277509544417,0.77809131371363704499,0.0032167707788001973813,1,1.8999878763831592465
1,1.8461008704847441386,3.3166184352266667723,0.0010618116194862864485,1,0.73062412835015855261
1,1.8446747971175767589,-0.5510052698548498773,0.00055589765186737070436,1,0.10192248118822393177
1,1.8392428244111167501,0.58006373754978457491,0.00545806009707059097,1,0.056222272134307069158
1,1.8288625548132670939,-0.68777522006887503725,0.025436454828373967346,1,-0.86715462711175650412
1,1.8132341009282064714,2.1150341339656675288,0.0007311949805323620169,1,0.50678113638155541931
1,1.8114739727305306793,-0.82339807466631487198,0.0092466008939819099854,1,-1
1,1.8010488388352685618,0.24775753165301919734,0.0053388410485342265369,1,1.999999999999999778
1,1.797082842627786059,-0.31587670429941655525,0.0044653840842661957772,1,1.999999999999999778
1,1.7793429702400824777,0.71714942183421359623,0.0027726508308034093428,1,0.29665039459260145183
1,1.7756818844747694897,-0.49708925688703931023,0.0051353405210426356434,1,-0.21838465364361173138
1,1.7712301130745953248,0.18776430082624093187,0.0015874929349540844482,1,1.999999999999999778
1,1.7699209603946546299,-0.27542944735753677188,0.0029400697010911109631,1,-1
1,1.7682531009657012078,0.1366807696427249641,0.00069669611408187503542,1,0.20000000000000006661
1,1.7668586614590284789,-0.15663423814276153379,0.0012613601761798693031,1,-0.43768162294892959396
1,1.6953710032538809038,-3.8607439134337191433,0.0036971659777867609334,1,-1
1,1.6920663161541680264,29.321908214239108759,0.012478200981693126151,1,0.22347695372100495614
1,1.6858340580688504495,8.9991814020686948794,0.0059151050041132040638,1,0.39868976212332568609
1,1.6833407450245589931,-21.059071474641090305,0.012370267018741779724,1,0.0014368711639656250867
1,1.6821999863162921951,6.4471382021589880296,0.0040021012737266187242,1,-0.60186408165621074762
1,1.6809148704898912996,2.5943778925442830818,0.0022062891852361733551,1,1.3999999999999999112
1,1.6683885967589484611,-7.9709390230900831753,0.0015956497037575849592,1,1.7999999999999998224
1,1.66749399794663411,8.6419573937825582277,0.0029344841535173362204,1,0.069714334047707660069
1,1.6652187163269811521,-25.158440561102874966,0.0051072657962943140628,1,0.1574431914010337441
1,1.6469645714910459144,-23.052765703937165398,0.0047885317802202993429,1,0.13370606868221762698
1,1.6332377438522149848,2.0580203164603028121,0.0016896630266114117443,1,0.71277478363841073605
1,1.6315071561371214948,-5.382095522447289504,0.0023455435469206717923,1,0.78373291387340315861
1,1.6279328545019950969,5.3873861332477259722,0.010107492565783401939,1,-1
1,1.6181888707476714817,-1.0872291483785723187,0.0019340861638454196619,1,5.5511151231257827021e-17
1,1.6150627400376158516,1.4876416307265256656,0.0052641891057760908587,1,-0.80091751736614857915
1,1.5911561164700371851,-5.7844686376596010646,0.037558678072965263894,1,1.999999999999999778
1,1.5842918922647788449,0.73822225960682474888,0.0018047741673943614848,1,-1
1,1.5763598998498138393,0.61357916763028852447,0.0011313406277738634852,1,-0.93136784629530677826
1,1.5617021345618018469,-3.1193214874763524058,0.042148740408570604943,1,-0.65826765342323123598
1,1.5368524760906605575,-0.9279580261284307019,0.043081212173587943304,1,-0.57063380568558652595
1,1.5080227344285757063,-0.61742639526703391173,0.037045164042949184358,1,-1
1,1.4814757870950754359,-0.54532258513842657432,0.00095091673059956619788,1,-1
1,1.4182470986805324475,-0.60019537331889039056,0.0043600191396808004804,1,0.80000000000000004441
1,1.4060038278369004772,-1.4117586280555174394,0.00062948565308899515069,1,1.999999999999999778
1,1.3995161420515251915,-0.51900617747702482152,0.0033804067778411433544,1,0.39960503357564564064
1,1.8541352800806445433,-2.1581161505560735314,0.0021355364194136907882,0,0
1,1.6913884462566395328,-10.926456768238477224,0.0075098976102830998502,0,0
1,1.6679846798292858878,5.6397479083255737109,0.0010097924130450474083,0,0
1,1.664316838431385781,14.364646705095257317,0.0046952260994418517151,0,0
1,1.6313016539617357648,5.7530059943652664955,0.003336944276497394099,0,0
1,1.6171747281098196591,3.6435563742520833408,0.00091522989403443886277,0,0
1,1.5995099346649954697,8.8392390551083330763,0.001220306525379251817,0,0
1,1.5823892836095239112,8.7587208587767424461,0.00076269157836203233143,0,0
1,1.9624129685022702052,-0.44544985273444592799,0.013565655592495501694,1,-1
1,1.8944022880267812337,-0.57405109386482311429,0.078243232254445155283,1,1.999999999999999778
1,1.8600927406564389255,1.1180773675379260812,0.029242017562299913586,1,-0.85499145689631306233
1,1.8543962835120517685,1.1702507080997097688,0.0023329144951128254724,1,1.2091835465490081702
1,1.8470518794669599227,-0.85406376776104309112,0.0051505296040486280018,1,-1
1,1.8417625923627276574,-0.29735122402693664467,0.0017817453990929567591,1,-0.032290803590953008617
1,1.8276637590712754289,-0.37036014518088500314,0.0014594731052910759651,1,0.52717873363702372203
1,1.8224262607410097736,0.59902938978063335895,0.030116259927189425322,1,-1
1,1.8060826032524579521,-0.49442551334483264558,0.050225637887759869149,1,0.60000000000000008882
1,1.7874422498931583636,-0.69879894205602810509,0.014782226231261791707,1,1.027782688816574197
1,1.7755692940841469873,0.3154609491310859104,0.0081712732999604329592,1,0.98038232286190707399
1,1.6940657082364967145,-0.68160468601139212463,0.0071737992532856570058,1,-0.98208335987240968912
1,1.6928008246918131441,-4.9223018058193765967,0.01272181482018186309,1,0.60515080628496420445
1,1.6921364814451702596,5.0189414251177009163,0.015924722577295966769,1,1.7569633296194726579
1,1.6919834487715195159,2.6220137083079904095,0.0043567954481452736068,1,0.45457809606998605956
1,1.6876231348999131132,-4.4242366385970477438,0.0059471168796939996234,1,-0.64585185774943509873
1,1.6844310910233286638,12.226580471040461973,0.020864130550621369509,1,1.999999999999999778
1,1.6832183218733591801,10.36751292210983344,0.0073337308085070730332,1,0.31024285074990154421
1,1.6805225611871230651,-2.2731471583474704978,0.0032962007158843422555,1,-0.10708145835906809906
1,1.6799564472737353871,0.99993908765546135609,0.0020363085927434321568,1,1.3776900018012858684
1,1.6686048629602345805,3.1934789979583761976,0.00095381685553253209645,1,0.99110176680528083715
1,1.6677217014185390376,-6.1319741959381213192,0.0018416817934063739806,1,0.30551161373389862375
1,1.6659303261954445663,10.729765108438458654,0.0029137569770139350178,1,0.337114522031338959
1,1.6645634206309851688,-2.6042009079316854603,0.0013728448410516580231,1,0.98491554639102441016
1,1.6470534315733669217,11.042865985896654024,0.0040088480175559312868,1,1.5470045003800729777
1,1.6316575066833518548,2.7170151506788222662,0.0034825528153385595584,1,0.328809405524955356
1,1.6314700373075210482,-3.3394552618023047863,0.0078689117614683737334,1,-0.42162539024975709268
1,1.6303461145382791564,0.63813953624179142743,0.0025241820449085619268,1,1.8910040153730971468
1,1.6301575427617041036,-1.1735254980640215106,0.0018010702154285388246,1,-0.88682009682234297365
1,1.6268650824275345812,-0.60924411699604663628,0.0025885416585778083659,1,0.79314594509000535538
1,1.6260347296377084536,2.1126864990518767762,0.004248202070684417922,1,1.999999999999999778
1,1.6250924091117611159,0.3965917843622583927,0.0014866107025581299164,1,1.9788849570941158262
1,1.6219856176168880868,-2.284505454646812872,0.005437097928374324575,1,-0.34771682275700688258
1,1.6189390400974146278,1.4099704620475810302,0.0028750914001021785765,1,0.19720082762952478861
1,1.6172088888690556718,-3.1844547197134716043,0.00088415849779856063324,1,-0.40000000000000007772
1,1.6153398202311997078,0.94501145430548605386,0.00093547968865317649573,1,0.66141940868332749215
1,1.6148336327953787261,-2.5753798019308007383,0.018723318383820290733,1,1.0852259859139217202
1,1.6145092123940112394,-0.48875376326744834898,0.00070389473220924532286,1,1.999999999999999778
1,1.6016812602514332031,1.3506523141151114409,0.0027238984941501151286,1,-0.29077814297177428937
1,1.5995457238320196502,-7.9638806368345029796,0.0011793108191005964146,1,0.29309869541893285305
1,1.5952081508075657279,1.9873295231520928805,0.010598118459000523475,1,1.227870928411924023
1,1.5881053501565891573,-0.89171825302117602163,0.0037807462768525623362,1,-0.31188009091429930164
1,1.5851919913599608059,0.5571502295571044705,0.0029871895524231778518,1,1
1,1.5824210509888105847,-7.9357320333293239756,0.00076269157836203233143,1,0.53404448931085490848
1,1.5773840595501174011,6.6441215263619817222,0.068250120629767679903,1,-0.50115594961883769276
1,2.0011118989594058881,-1.6077958000874212896,0.00076269157836203233143,0,0
1,1.8560593651418531014,-2.5347299499278039825,0.00076269157836203233143,0,0
1,1.7783346309522700679,-0.42475219125374752416,0.0016779214723964710858,0,0
1,1.682979267677415125,-19.000461366108101657,0.0054913793642066329598,0,0
1,1.6686212456049365205,-5.3516425555039557338,0.0015253831567240646629,0,0
1,1.665681554792302288,-11.041579036335551933,0.003652095938530013422,0,0
1,1.6465139307585130446,-8.7185832059435224295,0.0048597832191667831442,0,0
1,1.6317572278502552319,-2.0007586677141144804,0.0031220768221754055527,0,0
1,1.6287583788975972254,0.33755203519022564107,0.00038889443879689192252,0,0
1,1.6212957654160979892,2.5812724052144653264,0.0019829981037412839316,0,0
1,1.6131690922187307269,3.5656447618846351943,0.0022880747350860972111,0,0
1,1.4071631314721377848,1.3037802703449872244,0.0010677682097068453941,0,0
2,1.6511627872062184519,-4.3026129921294851144,0.00076085532550685763906,0,0
2,1.642660155413155465,-1279.0234607315674111,0.0036083445978496281846,0,0
2,1.6398656924745775854,141.11857286542866063,0.00053295638840897946974,0,0
2,1.638691885053069619,-224.52087165142734193,0.001434617720898763004,0,0
2,1.6365815150713878268,179.94199811664512367,0.001219060442490943301,0,0
2,1.6336737812930108849,-167.35490596643134609,0.0028036042326679902481,0,0
2,1.6270214584676230274,1.6550068674335298713,0.0023060387683309828757,0,0
2,1.6200291795540537887,-3.8405536654357343984,0.0063809983839295718669,0,0
2,1.6142037957797406023,-0.41439347250980679283,0.00076926825635205301011,0,0
2,1.6112974309086203206,0.66211769548582510847,0.0027834641906881035789,0,0
2,1.4060192754591178677,0.41180038482362951724,0.00061015326268962590851,0,0
2,1.6513725184401473189,-13.436910620320052345,0.0026250958027963029913,1,0.16484203040854875089
2,1.6497551163965695764,52.287204308493123506,0.0040046487543031637421,1,0.36079338677977784711
2,1.6469645714910459144,-123.90955629926631332,0.0047885317802202993429,1,0.13370606868221762698
2,1.6452359240035123733,-161.42781351922724298,0.0032758843609704633298,1,-0.043073119843104634707
2,1.6442434185248866463,-134.54293713735694382,0.0025102308174281091555,1,0.010079048259468453841
2,1.6431431981360311578,71.526669953405288993,0.0010463637174705764637,1,0.65279200321666830398
2,1.642485801243358523,-95.261529615774108493,0.0010856148624397994173,1,0.12518306604655482506
2,1.6416133385937161648,179.49565309636830079,0.0011160173999059316841,1,1.8235663346754369396
2,1.6400497938530247399,509.89568792118711826,0.0016921925658164116511,1,0.7738912340546530988
2,1.6386765253267427944,103.91198586682038751,0.0011107803386097882259,1,-0.48044239670905286577
2,1.6379235342615239279,-109.33487248540905057,0.00091079573666201702788,1,1.5372024762373446283
2,1.6370764218861482142,116.82507474208617282,0.0011634522736433969368,1,-0.065831953270793289179
2,1.6365061456735059409,-17.37111214599679343,0.00038783589477859247655,1,1.7999999999999998224
2,1.6360065489626862689,128.4473842993361643,0.0017485534195153813308,1,-0.87095658732047387396
2,1.6346418633758792449,-27.515047260119530392,0.0014637484606939792347,1,1.847250677411251818
2,1.6332377438522149848,15.397565336217738263,0.0016896630266114117443,1,0.71277478363841073605
2,1.6315071561371214948,-25.37391820075387372,0.0023455435469206717923,1,0.78373291387340315861
2,1.6279328545019950969,12.318297667048190291,0.010107492565783401939,1,-1
2,1.6181888707476714817,-0.7770326316483406881,0.0019340861638454196619,1,5.5511151231257827021e-17
2,1.6150627400376158516,0.83997268074949105188,0.0052641891057760908587,1,-0.80091751736614857915
2,1.5911561164700371851,-1.4126208786002600881,0.037558678072965263894,1,1.999999999999999778
2,1.5842918922647788449,0.16650728382915516712,0.0018047741673943614848,1,-1
2,1.5763598998498138393,0.13085799612042903206,0.0011313406277738634852,1,-0.93136784629530677826
2,1.5617021345618018469,-0.63253006618206386591,0.042148740408570604943,1,-0.65826765342323123598
2,1.5368524760906605575,-0.18368479641579937844,0.043081212173587943304,1,-0.57063380568558652595
2,1.5080227344285757063,-0.12219445646743566647,0.037045164042949184358,1,-1
2,1.4814757870950754359,-0.10857811909923498206,0.00095091673059956619788,1,-1
2,1.4182470986805324475,-0.12144679766347496463,0.0043600191396808004804,1,0.80000000000000004441
2,1.4060038278369004772,-0.28645046164083309836,0.00062948565308899515069,1,1.999999999999999778
2,1.3995161420515251915,-0.10545534576593455778,0.0033804067778411433544,1,0.39960503357564564064
2,1.6511879605433723572,7.1228994805517986677,0.0021355364194136907882,0,0
2,1.6449201590250226435,201.63687357095960806,0.0070546463828597572726,0,0
2,1.6426454923857871648,133.5448125329722302,0.0012363943633888509459,0,0
2,1.6405475055186042876,-42.268866586463488488,0.00063904981613126005287,0,0
2,1.6398587661360675138,-48.553831573800479759,0.00036344624814448587852,0,0
2,1.6390710760273523583,-19.380756705193025624,0.0004509480021730074401,0,0
2,1.6378546823458661752,81.135062559382078007,0.00093578195170256582569,0,0
2,1.6364924883374878384,16.672358694573713223,0.0004027060845846985827,0,0
2,1.6345110019810562552,39.057911178811778541,0.001726163852004277419,0,0
2,1.6313016539617357648,25.823566812121359959,0.003336944276497394099,0,0
2,1.6171747281098196591,2.3997914440108427669,0.00091522989403443886277,0,0
2,1.5995099346649954697,2.5389640804857500633,0.001220306525379251817,0,0
2,1.5823892836095239112,1.9436997999166532036,0.00076269157836203233143,0,0
2,1.6516384223383140384,2.6950574904832751422,0.0012002665080217912643,1,0.12265585001208734184
2,1.650703549329875397,-12.196039030421026439,0.0020830218327882112257,1,0.8368620486062486874
2,1.6503259475255704913,2.4136019125690797438,0.0014711017208917564949,1,0.066011987632516089253
2,1.6493675943823393748,-15.819784260618375171,0.0019059727753695813925,1,0.89749627935768638842
2,1.6470534315733669217,58.248258267014051626,0.0040088480175559312868,1,1.5470045003800729777
2,1.6453411451888573236,-11.769931770503172075,0.0014641501511836595584,1,1.8292676358054629215
2,1.6443835114940421605,47.769407893057554304,0.0018693169223327073779,1,1.1999999999999999556
2,1.6428666054829830223,-125.45700308427299774,0.0014711017208917564949,1,0.048541841695881868257
2,1.6422489354283003049,5.8522218468163549332,0.00019780697840798136598,1,0.38472569212981522213
2,1.6416460875689802279,-88.305743912028447085,0.0016324351253657208485,1,0.36296348544964390781
2,1.6405822758353723057,-48.797115150097184255,0.0016983462317115675683,1,0.12466174961946768773
2,1.6395876702903802169,28.288607971214318582,0.0011526174754245283992,1,0
2,1.6389339873148269788,-54.411663643564374127,0.0017745410013927827297,1,-0.71294588899279753846
2,1.6380937171521356976,46.050783704502826765,0.0010060074262127733594,1,1.3303168515546668349
2,1.6370649127995888783,-44.109238291943910326,0.001206176155823458513,1,-0.35009950566299047336
2,1.6365028518389059808,11.458937956210707654,0.00059491075997293043319,1,1.8031557632608663511
2,1.6359955495739006981,-28.359797949120643779,0.0010217894251714322931,1,-0.31379252136104363036
2,1.6352319937130730398,29.522056285473738058,0.0011982721160683407115,1,0.10739360615249105013
2,1.6346105405582165293,-7.1442128209688240403,0.00063754692658513859721,1,1.0006339216544344328
2,1.6341008379392236716,14.192832441147931632,0.0018044916240644143755,1,-1
2,1.6336820394975186677,-24.744525639666324679,0.0020595424092484590495,1,-0.5586748786631751118
2,1.6316575066833518548,13.287056601379390486,0.0034825528153385595584,1,0.328809405524955356
2,1.6314700373075210482,-15.603657466673876542,0.0078689117614683737334,1,-0.42162539024975709268
2,1.6303461145382791564,2.3111177624902956573,0.0025241820449085619268,1,1.8910040153730971468
2,1.6301575427617041036,-4.0838072045220163986,0.0018010702154285388246,1,-0.88682009682234297365
2,1.6268650824275345812,-1.1710777479893395014,0.0025885416585778083659,1,0.79314594509000535538
2,1.6260347296377084536,3.5850551647618122963,0.004248202070684417922,1,1.999999999999999778
2,1.6250924091117611159,0.58990310773312459869,0.0014866107025581299164,1,1.9788849570941158262
2,1.6219856176168880868,-2.3384013742095364208,0.005437097928374324575,1,-0.34771682275700688258
2,1.6189390400974146278,1.0742580797176366492,0.0028750914001021785765,1,0.19720082762952478861
2,1.6172088888690556718,-2.1030062275120364745,0.00088415849779856063324,1,-0.40000000000000007772
2,1.6153398202311997078,0.54384666074236542865,0.00093547968865317649573,1,0.66141940868332749215
2,1.6148336327953787261,-1.4317795731120366298,0.018723318383820290733,1,1.0852259859139217202
2,1.6145092123940112394,-0.26592364339384366723,0.00070389473220924532286,1,1.999999999999999778
2,1.6016812602514332031,0.41159229824204646153,0.0027238984941501151286,1,-0.29077814297177428937
2,1.5995457238320196502,-2.2896058032162738272,0.0011793108191005964146,1,0.29309869541893285305
2,1.5952081508075657279,0.51919814523458374111,0.010598118459000523475,1,1.227870928411924023
2,1.5881053501565891573,-0.20924829471940845083,0.0037807462768525623362,1,-0.31188009091429930164
2,1.5851919913599608059,0.12673181823705162441,0.0029871895524231778518,1,1
2,1.5824210509888105847,-1.7615139363161125274,0.00076269157836203233143,1,0.53404448931085490848
2,1.5773840595501174011,1.4250603770984846541,0.068250120629767679903,1,-0.50115594961883769276
2,1.6515228511982618098,-3.0431860822829484015,0.00076269157836203233143,0,0
2,1.6465139307585130446,-51.72102888696072398,0.0048597832191667831442,0,0
2,1.6424118321235166018,3.4568565913890934027,0.00017341015445362895856,0,0
2,1.6419803978282652146,-3.4303614599817517927,9.5637379852481059169e-05,0,0
2,1.6415970429375086326,18.405447819663855569,0.0003366399845372603796,0,0
2,1.641033644337704267,9.3886309214169187953,0.00041341197904196021759,0,0
2,1.6397831240679150433,-24.003307527375330466,0.00039678555739585698574,0,0
2,1.6379546604344061844,-41.558076993692090184,0.00098604556220076105232,0,0
2,1.6364514144309891819,-14.793481808235313224,0.00068408931523134734829,0,0
2,1.6351903955356170695,-27.968290762787123782,0.0012463121386016074756,0,0
2,1.6317572278502552319,-10.028226962921507948,0.0031220768221754055527,0,0
2,1.6287583788975972254,0.89294338340083478922,0.00038889443879689192252,0,0
2,1.6212957654160979892,2.4578743167885144238,0.0019829981037412839316,0,0
2,1.6131690922187307269,1.7826528494507423162,0.0022880747350860972111,0,0
2,1.4071631314721377848,0.2644740597719524855,0.0010677682097068453941,0,0
3,1.6607749027307916467,-95.204100729049400798,0.0032609908510879640625,0,0
3,1.6593752402632631071,16.311086555009559618,0.00040906928405889193736,0,0
3,1.6584468476847817886,-49.579407169053567372,0.0007878076624290479904,0,0
3,1.6565868340930671732,-328.43616149454715014,0.0013176464358879032539,0,0
3,1.6546345669802675626,99.953775504719416745,0.00092129944273952536944,0,0
3,1.6533324080631484065,-58.770252642580345537,0.00080724487669871290534,0,0
3,1.6521156180769724919,13.611212885500034275,0.0005528556739625152365,0,0
3,1.6511627872062184519,-15.063275531229370685,0.00076085532550685763906,0,0
3,1.6683885967589484611,-7.7513411104307916588,0.0015956497037575849592,1,1.7999999999999998224
3,1.66749399794663411,9.5060998050865155307,0.0029344841535173362204,1,0.069714334047707660069
3,1.6652187163269811521,-40.20830203060528163,0.0051072657962943140628,1,0.1574431914010337441
3,1.663908285563269196,1.4290891945044545963,0.00074032805690105944318,1,0.60000000000000008882
3,1.6627417216334614558,-35.254670071080610683,0.0043552546962296384211,1,-0.31944119070202109389
3,1.6613652751591554413,10.98642244636180898,0.0015773532630157813348,1,0.022298132127807721026
3,1.6594522173843606616,73.008141081574564168,0.0015322577189698025069,1,-0.31070183583339744393
3,1.6586654309381836381,-6.9564649012914445692,0.00022807103519526414847,1,1.6305323126691049218
3,1.6576628221032063681,86.08947250143936003,0.0012820161291239736377,1,-0.67236839638310441636
3,1.656879628974905927,-36.608768239494146712,0.00050886904490002142758,1,1.5351613721427472825
3,1.6560249367514112695,-104.45315897270886296,0.00096454984900300948063,1,1.0205506064809652944
3,1.6551713384137203278,84.006473164792694774,0.0007012536751533650619,1,1.9756679642444947564
3,1.6545692035162911093,-12.876792379123443766,0.00024233021227236466286,1,1.5999999999999998668
3,1.6544253610482808625,126.20842398839876353,0.0015720834626075396757,1,1.2616042736262516044
3,1.6536836865829138699,-54.808006463462334068,0.00076088213222203870782,1,0.89252111657829169555
3,1.6529662570480021522,-71.590494913463885496,0.0011992949680202263148,1,-0.15857849200890944408
3,1.6523828009312411247,102.02720564386686419,0.0030317078754656884634,1,-0.40000000000000007772
3,1.6513725184401473189,-54.510667053547713579,0.0026250958027963029913,1,0.16484203040854875089
3,1.6497551163965695764,73.564297469973624288,0.0040046487543031637421,1,0.36079338677977784711
3,1.6469645714910459144,-38.350961221683057545,0.0047885317802202993429,1,0.13370606868221762698
3,1.6679846798292858878,5.7901447549302957896,0.0010097924130450474083,0,0
3,1.664316838431385781,27.462738998268061863,0.0046952260994418517151,0,0
3,1.6602623900879061036,-16.684818830565689041,0.00086841827982232474084,0,0
3,1.6593685929381780664,-13.613345790368459376,0.00056380356196927166375,0,0
3,1.6588990557665781456,-9.9482283629967245275,0.00044246742763050071626,0,0
3,1.6580940913282260496,-12.564251177926342606,0.00084326999874887484214,0,0
3,1.6572526468208172989,-10.158685407282579405,0.0001760527745570374602,0,0
3,1.656001951300545505,51.655891437970595348,0.0012130467976201467564,0,0
3,1.6549464477821083097,-32.290795890785382483,0.00064220704799970089287,0,0
3,1.6531664370011573961,46.739081403637150913,0.0014045495847459881205,0,0
3,1.6511879605433723572,25.378162791287866895,0.0021355364194136907882,0,0
3,1.6686048629602345805,3.0192511866511968499,0.00095381685553253209645,1,0.99110176680528083715
3,1.6677217014185390376,-6.5297697724326475566,0.0018416817934063739806,1,0.30551161373389862375
3,1.6659303261954445663,15.093842764560085001,0.0029137569770139350178,1,0.337114522031338959
3,1.6645634206309851688,-4.7306524585613383138,0.0013728448410516580231,1,0.98491554639102441016
3,1.6627348783765760754,20.272967497858939367,0.0032139761651723084551,1,0.28245637922985744606
3,1.6614719456946178688,-4.6385954456337623597,0.001210921424927622822,1,0.27760689057721510409
3,1.6605891410476447678,-10.076301865324047924,0.0013958660654856808441,1,-0.40000000000000007772
3,1.6598465650201363886,2.2709397679848772889,0.00016011601716797951812,1,1.999999999999999778
3,1.6590256638776745834,14.57338925452299172,0.0018001069733781949883,1,0.2051997461642974252
3,1.6579057183873737724,-6.0364361072013332787,0.0010461091795275216827,1,1.8845917384401571493
3,1.6572284205973577542,-9.3470670039426124731,0.00087829183279591806644,1,0.70450704745967462905
3,1.6566241434838533397,24.41041296668776539,0.00087164751812803702765,1,0.47036228522344192271
3,1.6558216447672877703,19.915501739625184996,0.00046479904917248038429,1,1.7999999999999998224
3,1.6552652199821420442,-44.563486616422679276,0.00094007198570343532967,1,-0.071045377340056448112
3,1.6547805777365240942,7.2615852444238599972,0.00048630549115635096896,1,1.999999999999999778
3,1.6542308579833038262,-56.042138993270093295,0.0011350113500982435873,1,0.71197587416235696978
3,1.6535362568884346413,22.329891070877931014,0.00059279629635826923146,1,1.5205593143937874423
3,1.6530324590386429318,-23.805997618630843959,0.0012058945184013133024,1,-0.59162552103460552821
3,1.6528238673256288038,24.154217297572856182,0.0012118748529562704385,1,1.0824979284812594749
3,1.6521225575369085092,-32.270637943082647325,0.001409234131805723331,1,0.39298228777577975945
3,1.6516384223383140384,13.228214992888165824,0.0012002665080217912643,1,0.12265585001208734184
3,1.650703549329875397,-31.244141003134711099,0.0020830218327882112257,1,0.8368620486062486874
3,1.6503259475255704913,4.8359055688218495206,0.0014711017208917564949,1,0.066011987632516089253
3,1.6493675943823393748,-17.703719711703573836,0.0019059727753695813925,1,0.89749627935768638842
3,1.6470534315733669217,18.857190561877967383,0.0040088480175559312868,1,1.5470045003800729777
3,1.6686212456049365205,-5.0490095218874095906,0.0015253831567240646629,0,0
3,1.665681554792302288,-16.220800782241138194,0.003652095938530013422,0,0
3,1.6632390734866393522,-21.825758953888087177,0.0045784187124752306203,0,0
3,1.6598098903617544142,-10.855767789587332572,0.001220306525379251817,0,0
3,1.6593464065744301106,-13.570927351402717775,0.00045761494701721943138,0,0
3,1.6588823450776795099,-12.592826130590804468,0.0015717468053226531319,0,0
3,1.6569898409738557099,-15.95535395691087821,0.00054846171275307203669,0,0
3,1.6565741892303023075,-23.676685365035666564,0.00076269157836203233143,0,0
3,1.6560010634603210544,-23.670208038965590447,0.0005774663979211504608,0,0
3,1.6554299346550651606,-4.6201724806636255138,0.00011285215928006276829,0,0
3,1.6551723853994693147,1.4077401287044351008,5.2657515190433731346e-05,0,0
3,1.6547928948128098892,-4.534857001688155087,0.00026401065386508340343,0,0
3,1.6543012340853051612,3.4641879971624622847,0.00032881233252856002141,0,0
3,1.6533806487062856494,-26.706924296815731878,0.00073026462125670536796,0,0
3,1.6515228511982618098,-13.74336542609647438,0.00076269157836203233143,0,0
3,1.6465139307585130446,-12.761982152369048649,0.0048597832191667831442,0,0
4,1.6607749027307916467,-382.57872253365036386,0.0032609908510879640625,0,0
4,1.6593752402632631071,91.536621045197719582,0.00040906928405889193736,0,0
4,1.6584468476847817886,-281.41057571089800149,0.0007878076624290479904,0,0
4,1.6565868340930671732,-722.97337088228982793,0.0013176464358879032539,0,0
4,1.6546345669802675626,53.833859273186568828,0.00092129944273952536944,0,0
4,1.6533324080631484065,-19.756804602475853017,0.00080724487669871290534,0,0
4,1.6521156180769724919,5.042385966011498688,0.0005528556739625152365,0,0
4,1.6511627872062184519,-6.7112449289295659227,0.00076085532550685763906,0,0
4,1.6683885967589484611,-15.797694786350060525,0.0015956497037575849592,1,1.7999999999999998224
4,1.66749399794663411,19.96137302975706973,0.0029344841535173362204,1,0.069714334047707660069
4,1.6652187163269811521,-93.822108729453915998,0.0051072657962943140628,1,0.1574431914010337441
4,1.663908285563269196,3.6580734870447484397,0.00074032805690105944318,1,0.60000000000000008882
4,1.6627417216334614558,-101.48789939946659899,0.0043552546962296384211,1,-0.31944119070202109389
4,1.6613652751591554413,39.018949755548888447,0.0015773532630157813348,1,0.022298132127807721026
4,1.6594522173843606616,403.64658688162296585,0.0015322577189698025069,1,-0.31070183583339744393
4,1.6586654309381836381,-40.847419658305192058,0.00022807103519526414847,1,1.6305323126691049218
4,1.6576628221032063681,358.72061951676886338,0.0012820161291239736377,1,-0.67236839638310441636
4,1.656879628974905927,-97.210358310688505412,0.00050886904490002142758,1,1.5351613721427472825
4,1.6560249367514112695,-154.30617793283980177,0.00096454984900300948063,1,1.0205506064809652944
4,1.6551713384137203278,65.144056754007479526,0.0007012536751533650619,1,1.9756679642444947564
4,1.6545692035162911093,-6.6660736659386943259,0.00024233021227236466286,1,1.5999999999999998668
4,1.6544253610482808625,60.172908853156897635,0.0015720834626075396757,1,1.2616042736262516044
4,1.6536836865829138699,-19.474420008220203471,0.00076088213222203870782,1,0.89252111657829169555
4,1.6529662570480021522,-23.881382499271950337,0.0011992949680202263148,1,-0.15857849200890944408
4,1.6523828009312411247,36.142917222962900325,0.0030317078754656884634,1,-0.40000000000000007772
4,1.6513725184401473189,-23.310042930076370737,0.0026250958027963029913,1,0.16484203040854875089
4,1.6497551163965695764,41.764239034745571644,0.0040046487543031637421,1,0.36079338677977784711
4,1.6469645714910459144,-29.332618003463302614,0.0047885317802202993429,1,0.13370606868221762698
4,1.6679846798292858878,11.953669074013586027,0.0010097924130450474083,0,0
4,1.664316838431385781,68.053962830701834719,0.0046952260994418517151,0,0
4,1.6602623900879061036,-75.866429790636388475,0.00086841827982232474084,0,0
4,1.6593685929381780664,-76.49100731992214719,0.00056380356196927166375,0,0
4,1.6588990557665781456,-58.906533377369228788,0.00044246742763050071626,0,0
4,1.6580940913282260496,-64.009639601380783347,0.00084326999874887484214,0,0
4,1.6572526468208172989,-33.710708452660888668,0.0001760527745570374602,0,0
4,1.656001951300545505,75.006911106552564661,0.0012130467976201467564,0,0
4,1.6549464477821083097,-21.33905555903363549,0.00064220704799970089287,0,0
4,1.6531664370011573961,15.569827010687903979,0.0014045495847459881205,0,0
4,1.6511879605433723572,11.251788747135266888,0.0021355364194136907882,0,0
4,1.6703563337282962831,3.7383120126278011064,0.0020656666404240313709,1,-0.83435365930525473566
4,1.6694860618412363795,-8.1890267629001893823,0.001811295869131929713,1,0.64411003169530001156
4,1.6686048629602345805,6.1133629740468089508,0.00095381685553253209645,1,0.99110176680528083715
4,1.6677217014185390376,-13.601250810712249617,0.0018416817934063739806,1,0.30551161373389862375
4,1.6659303261954445663,33.879180674834302067,0.0029137569770139350178,1,0.337114522031338959
4,1.6645634206309851688,-11.515072406069043254,0.0013728448410516580231,1,0.98491554639102441016
4,1.6627348783765760754,58.408030767538257066,0.0032139761651723084551,1,0.28245637922985744606
4,1.6614719456946178688,-16.148461188390452747,0.001210921424927622822,1,0.27760689057721510409
4,1.6605891410476447678,-42.283412120591272298,0.0013958660654856808441,1,-0.40000000000000007772
4,1.6598465650201363886,11.469182693004661644,0.00016011601716797951812,1,1.999999999999999778
4,1.6590256638776745834,85.759109825626111956,0.0018001069733781949883,1,0.2051997461642974252
4,1.6579057183873737724,-28.371645103727676229,0.0010461091795275216827,1,1.8845917384401571493
4,1.6572284205973577542,-30.584815538674668289,0.00087829183279591806644,1,0.70450704745967462905
4,1.6566241434838533397,55.075205881905901606,0.00087164751812803702765,1,0.47036228522344192271
4,1.6558216447672877703,25.22881229934594316,0.00046479904917248038429,1,1.7999999999999998224
4,1.6552652199821420442,-37.02522716868887187,0.00094007198570343532967,1,-0.071045377340056448112
4,1.6547805777365240942,4.2913456139053645089,0.00048630549115635096896,1,1.999999999999999778
4,1.6542308579833038262,-24.188670064256566405,0.0011350113500982435873,1,0.71197587416235696978
4,1.6535362568884346413,7.7027757955350644181,0.00059279629635826923146,1,1.5205593143937874423
4,1.6530324590386429318,-7.9267910230237283997,0.0012058945184013133024,1,-0.59162552103460552821
4,1.6528238673256288038,8.1222076814170662828,0.0012118748529562704385,1,1.0824979284812594749
4,1.6521225575369085092,-11.940087297120003385,0.001409234131805723331,1,0.39298228777577975945
4,1.6516384223383140384,5.3671769892562117832,0.0012002665080217912643,1,0.12265585001208734184
4,1.650703549329875397,-15.175800543554574418,0.0020830218327882112257,1,0.8368620486062486874
4,1.6503259475255704913,2.5091011220831744843,0.0014711017208917564949,1,0.066011987632516089253
4,1.6493675943823393748,-10.614028715308794659,0.0019059727753695813925,1,0.89749627935768638842
4,1.6470534315733669217,14.325881633099507795,0.0040088480175559312868,1,1.5470045003800729777
4,1.6703826427340771055,-5.2244718947446271429,0.0013728448410516582399,0,0
4,1.6686212456049365205,-10.218251382877827638,0.0015253831567240646629,0,0
4,1.665681554792302288,-36.8791406217249218,0.003652095938530013422,0,0
4,1.6632390734866393522,-59.452001849570379477,0.0045784187124752306203,0,0
4,1.6598098903617544142,-55.324940569836734028,0.001220306525379251817,0,0
4,1.6593464065744301106,-76.560235424968396956,0.00045761494701721943138,0,0
4,1.6588823450776795099,-74.587595749983464088,0.0015717468053226531319,0,0
4,1.6569898409738557099,-45.323607245571153612,0.00054846171275307203669,0,0
4,1.6565741892303023075,-51.68198876599957714,0.00076269157836203233143,0,0
4,1.6560010634603210544,-34.347421165279769184,0.0005774663979211504608,0,0
4,1.6554299346550651606,-4.3422174647962936689,0.00011285215928006276829,0,0
4,1.6551723853994693147,1.0924861221143875589,5.2657515190433731346e-05,0,0
4,1.6547928948128098892,-2.7016921777702695984,0.00026401065386508340343,0,0
4,1.6543012340853051612,1.5474216104608105038,0.00032881233252856002141,0,0
4,1.6533806487062856494,-9.0193394595555460569,0.00073026462125670536796,0,0
4,1.6515228511982618098,-5.7049961922884540044,0.00076269157836203233143,0,0
4,1.6465139307585130446,-10.080649882609238333,0.0048597832191667831442,0,0
5,1.6822064265229044189,-10.085599383610835744,0.0019841057086592488005,0,0
5,1.6783489232179251704,-71.320427666400647126,0.0017572791886224584101,0,0
5,1.6767716519581434831,402.94796312910392544,0.0010460567457291113438,0,0
5,1.6755865915549956746,-88.179714917190821666,0.00050730363971734275617,0,0
5,1.6749826247447876515,18.271567236540700918,0.00020605590563530502119,0,0
5,1.673807287308416214,-384.83600285321904266,0.001049650207601962159,0,0
5,1.6717292867613482432,1224.8101227677325369,0.0024656637120015765033,0,0
5,1.6858340580688504495,10.1671788825490097,0.0059151050041132040638,1,0.39868976212332568609
5,1.6833407450245589931,-40.493478482145427222,0.012370267018741779724,1,0.0014368711639656250867
5,1.6821999863162921951,17.006671880375602512,0.0040021012737266187242,1,-0.60186408165621074762
5,1.6809148704898912996,10.613361813679581758,0.0022062891852361733551,1,1.3999999999999999112
5,1.6794421129780319202,-36.847723577911843051,0.0027461263332559638327,1,-0.33520439051262751473
5,1.6788240597283017319,12.213942712635690313,0.00071982534412049089222,1,1.999999999999999778
5,1.6779352642583791333,-92.389679289208174851,0.0017729621501225418904,1,-1
5,1.6771755675332435942,98.343671727735994637,0.00065461760948579280576,1,0.83555062922615963572
5,1.676454452968157538,80.942096838983729867,0.00060914587910145608259,1,-0.55348580746071407432
5,1.6757661854556635816,-146.97688417304976838,0.00075436672044190493901,1,1.2811316362508320399
5,1.6749808371296601717,28.770093669974187378,0.00043584419588227650078,1,1.7999999999999998224
5,1.6742443707900449557,-218.89644893329347042,0.0011180329511931675571,1,-0.74611393616813437291
5,1.6733312604549932523,-440.26785406984475912,0.0011585137387611454778,1,0.2419073530914461756
5,1.6721972465204313352,40.153463696761207302,0.0010323446708495151881,1,1.999999999999999778
5,1.6715468514367062269,-46.768909341280604508,0.00065816116683448588551,1,0.87775172710470505955
5,1.6704035241630399433,284.95273793093406312,0.0026023521258349028781,1,0.1411158316921952427
5,1.6683885967589484611,-26.833534937239711837,0.0015956497037575849592,1,1.7999999999999998224
5,1.66749399794663411,19.798879015133106662,0.0029344841535173362204,1,0.069714334047707660069
5,1.6652187163269811521,-26.602829243209672683,0.0051072657962943140628,1,0.1574431914010337441
5,1.6794672649437154544,43.540432289721707093,0.0026382534916932496097,0,0
5,1.6782531970319864989,50.221569488638223788,0.0013692004389239148966,0,0
5,1.676869719926016522,-5.6228226096743370022,0.00050500674681219304227,0,0
5,1.6756443124508135778,79.597587832335321423,0.00072319758761234156485,0,0
5,1.6746390244858242458,78.101302089812449481,0.00096866301483719324718,0,0
5,1.673751955055554852,83.012400155547538816,0.001220306525379251817,0,0
5,1.6724609134957730827,70.192938468897153825,0.00081711002815994780452,0,0
5,1.6704739549649518793,-51.228033946128959997,0.0019927465098630680988,0,0
5,1.6679846798292858878,15.843257634536088929,0.0010097924130450474083,0,0
5,1.6876231348999131132,-3.7333435720001078018,0.0059471168796939996234,1,-0.64585185774943509873
5,1.6844310910233286638,18.221094489126020477,0.020864130550621369509,1,1.999999999999999778
5,1.6832183218733591801,20.56811555744968345,0.0073337308085070730332,1,0.31024285074990154421
5,1.6805225611871230651,-10.874448651404973631,0.0032962007158843422555,1,-0.10708145835906809906
5,1.6799564472737353871,6.1343373064120223503,0.0020363085927434321568,1,1.3776900018012858684
5,1.6787076129184546058,-33.024093708295211513,0.0016808374773047544438,1,-0.17136244416315715711
5,1.6776140261727792158,11.229999957938307631,0.00071127952629984982948,1,0.94094641483498409062
5,1.6769950788310297174,-32.757032427480851311,0.0017777997675940638775,1,-0.077357109745040231186
5,1.6760968672758569387,25.316933864335158688,0.00053668097322760949588,1,1.999999999999999778
5,1.6752940428801281758,-49.758005418469863912,0.0013971570151586375826,1,-0.88602274079480047853
5,1.6740814883529020474,-38.652700496786856377,0.0022276423419490994082,1,0.10948106844799451731
5,1.6731449446893440491,28.378597842706383858,0.0010352148630373635921,1,-0.28934093011377087779
5,1.6725824010555672139,-13.527967544039299241,0.00053611578749699598419,1,1.7999999999999998224
5,1.671848885460740286,33.594509492538890072,0.0014421064218869744308,1,0.66420083637087556916
5,1.6710267512027818793,-39.028650692521338783,0.001279471514601952754,1,-0.83379456443297872426
5,1.6703563337282962831,25.540563636636981926,0.0020656666404240313709,1,-0.83435365930525473566
5,1.6694860618412363795,-28.914457689119188899,0.001811295869131929713,1,0.64411003169530001156
5,1.6686048629602345805,11.90834477177435069,0.00095381685553253209645,1,0.99110176680528083715
5,1.6677217014185390376,-15.411321875776247126,0.0018416817934063739806,1,0.30551161373389862375
5,1.6659303261954445663,14.089034922308133702,0.0029137569770139350178,1,0.337114522031338959
5,1.682979267677415125,-40.136660016014857888,0.0054913793642066329598,0,0
5,1.6764164864577879577,-39.488499463014548496,0.00061015326268962590851,0,0
5,1.6753484897817709776,-24.30959814707303579,0.00030507663134481295426,0,0
5,1.6749787409938068361,-20.787357554675875093,0.00045761494701721943138,0,0
5,1.6745322115889551551,-24.499886668995351613,0.00045761494701721943138,0,0
5,1.6739477844533245943,-30.353279579332710369,0.00045761494701721943138,0,0
5,1.6730360831526094323,-49.615347049442632965,0.0010677682097068453941,0,0
5,1.6719074598367562601,-57.793171864766179624,0.0018304597880688777255,0,0
5,1.6703826427340771055,-36.461834016452669971,0.0013728448410516582399,0,0
5,1.6686212456049365205,-20.114533596184095643,0.0015253831567240646629,0,0
5,1.665681554792302288,-13.411544541864769187,0.003652095938530013422,0,0
6,1.7098872312318547095,-711.44215726787888343,0.0029922114405274871478,0,0
6,1.7070756697705113947,144.76507364712017534,0.00055481609412531482373,0,0
6,1.7051586436403407543,-637.97938731896647369,0.0018069456993660450161,0,0
6,1.7030303781202391633,111.57842299345573167,0.0017361631987521399488,0,0
6,1.700777291956499182,-11.80514805555129243,0.00052033189767472693994,0,0
6,1.6962309553830685616,75.763532502144485647,0.0064772943569485694204,0,0
6,1.6822064265229044189,-2.9568447451902670764,0.0019841057086592488005,0,0
6,1.7174094094323455462,15.485343955551867268,0.0033039286884990657321,1,0.62032373344825320061
6,1.714604332343238724,-64.257444515080067049,0.005234809847755306049,1,0.31607512987953095829
6,1.7121379276769503885,-108.9064743824006456,0.0041424109380381445716,1,0
6,1.711344440046495663,-58.565701541576459022,0.0023455435469206717923,1,0.027404579442466995426
6,1.7103308682238489435,51.966944869820700603,0.0009882417574088640886,1,1.999999999999999778
6,1.7097102241392856392,-40.079704163696838748,0.00076574963540803264381,1,0.9021683703770924101
6,1.7087755132012818482,259.05982825188971219,0.0012762961386454331394,1,0.63326331949174408109
6,1.7079976071756439726,-20.866431925598913466,0.00030973393981556827459,1,1.999999999999999778
6,1.7070787218998093593,313.57973820383477914,0.0014672547659575466052,1,1.5387468387167255734
6,1.705873953684277966,-140.68944814719890246,0.00092385846436463013934,1,1.9039760856300402825
6,1.7052798858300639573,41.996502140677534953,0.00064067940034319024924,1,1.7999999999999998224
6,1.704694233409192794,-121.69484872291236854,0.0010855103668919621578,1,1.9230940325586751705
6,1.7036738114478995332,180.69682690156858484,0.001395859048831294422,1,-0.055005887572020240039
6,1.7023163788696764609,100.41231526359275961,0.0019334998963020911221,1,0.70743833261260646861
6,1.7006375692194839466,-81.026788993367347302,0.0020202493515646970622,1,1.754195745554074426
6,1.6996557945383954369,10.259572380094322597,0.0010688831041804833233,1,0.80000000000000004441
6,1.6986717473006391899,49.081840179744830266,0.0029844965205345283521,1,0.29266537976690792933
6,1.6968650083841430032,-33.571342624190556592,0.0039071396745411334644,1,-0.02736341848711842939
6,1.6953710032538809038,-21.030814093212160998,0.0036971659777867609334,1,-1
6,1.6920663161541680264,85.147864636967014462,0.012478200981693126151,1,0.22347695372100495614
6,1.6858340580688504495,10.627487167890235398,0.0059151050041132040638,1,0.39868976212332568609
6,1.6833407450245589931,-18.462617944087607924,0.012370267018741779724,1,0.0014368711639656250867
6,1.6821999863162921951,4.9726529310905478454,0.0040021012737266187242,1,-0.60186408165621074762
6,1.7133137912837494987,97.663094755804578995,0.0064431428010306790802,0,0
6,1.7080532211915020468,8.9348519553545759919,0.00018411955023967270365,0,0
6,1.7075553185469676265,-25.849887846161603733,0.00053575630548545808123,0,0
6,1.7071042387413408736,-39.648705250767001473,0.00029137300084384223876,0,0
6,1.7057350008493870064,105.80796313357114968,0.00087602376160098266271,0,0
6,1.7049152244408500856,78.267452273222502868,0.0010890063046718281327,0,0
6,1.7028078320888824226,-48.961866511255038859,0.0018825357006714902967,0,0
6,1.7003654179085161413,28.800791221441212286,0.00090381769855448119717,0,0
6,1.6985935273468373286,-26.037838980327180138,0.0022367467636995601483,0,0
6,1.6913884462566395328,-28.352169391906329565,0.0075098976102830998502,0,0
6,1.7170313154353533669,-6.9219360046460041147,0.0020602369239417889744,1,0.2000000000000000111
6,1.7152127604637357194,26.847619633223221314,0.0036044863601834759882,1,0.44168543741617910525
6,1.7138749725472897101,-9.5066680795356113265,0.0015939989798368259417,1,1.3599116196323759453
6,1.7128942129675179817,-9.7374865382752293641,0.0012097100776674158101,1,0.10888778449139424609
6,1.7112791771522735118,90.344289391561119373,0.0031139712001409481854,1,0.099873323120519552631
6,1.7103572737571071105,-11.386281587754282896,0.00063828540978273968793,1,1.999999999999999778
6,1.709772631561919054,21.983623122010435225,0.00042017267065500935258,1,1.4122471153054894089
6,1.7089708269093781823,-48.642730425511942371,0.0010574842887637006961,1,0.64245992007133589929
6,1.7080016977788297083,11.392156393733229081,0.00033560613120440406986,1,-0.73723822836109764722
6,1.7078142968444571803,-49.406601162292311358,0.0023443982352292173227,1,1.9760786218828674254
6,1.7071468825184199503,6.3142064939947628588,0.00091472043373542382197,1,0.14832519641457156401
6,1.706523903570722478,-39.98054282526749148,0.0011248081001483439725,1,-0.0038000799698234763446
6,1.706046693935525882,23.051754638077795789,0.00032547743466737318139,1,1.999999999999999778
6,1.7053278228901060931,-69.531749382360359846,0.00081985607856379543509,1,0.72760143733567517188
6,1.7044286055688229187,24.908058501532298834,0.00052665391570513473904,1,1.8096266873629649474
6,1.7037669524376211072,-52.746208404422340266,0.0013419962938810412779,1,0.035520579301343391254
6,1.7023578766701399356,42.278476840801488379,0.0097127820371258766913,1,-0.74086975700962987013
6,1.7021425131482692539,-23.538524951886287795,0.0012178975003225415465,1,1.8999313368582118056
6,1.7010727466958148746,36.774302898945691709,0.0015181286275057421283,1,-0.83431141436972189318
6,1.7000081467367105237,19.86695219145236635,0.00087619083145768145767,1,-0.57587603751386107209
6,1.6992251210797362226,-14.846163387486555507,0.0012498889441252981208,1,-0.43510420940597244188
6,1.6984075316608255868,13.829295829737894508,0.002441774257603223329,1,-0.53988714678066551667
6,1.6978736712547946031,-5.3269758699805995761,0.001418087158441340076,1,0.66151205897107745457
6,1.696326732072314547,29.697768641863433459,0.004817637388271163966,1,0.2243705584009240972
6,1.6940657082364967145,-2.8432552008839038216,0.0071737992532856570058,1,-0.98208335987240968912
6,1.6928008246918131441,-16.236246435615523609,0.01272181482018186309,1,0.60515080628496420445
6,1.6921364814451702596,14.749213223712080989,0.015924722577295966769,1,1.7569633296194726579
6,1.6919834487715195159,7.508157012119360374,0.0043567954481452736068,1,0.45457809606998605956
6,1.6876231348999131132,-6.5883849629524169345,0.0059471168796939996234,1,-0.64585185774943509873
6,1.6844310910233286638,12.171028690776202197,0.020864130550621369509,1,1.999999999999999778
6,1.6832183218733591801,8.9631343602995983133,0.0073337308085070730332,1,0.31024285074990154421
6,1.7148797083146325448,-30.461319179627931675,0.0040389626036227109507,0,0
6,1.7115747472405880014,-77.329532894068378823,0.0024406130507585036341,0,0
6,1.7106920848421391934,-90.998777583017186998,0.003064099798873174893,0,0
6,1.7078509969457682516,-37.015904776306435053,0.0010677682097068453941,0,0
6,1.7069494415323025471,-28.724434829168028926,0.00030507663134481295426,0,0
6,1.7060144463075579413,-47.598151318489442474,0.0011981939264620036431,0,0
6,1.7045608064993873487,-56.304745982093187706,0.0018785028481667490671,0,0
6,1.702811027047888448,-55.712448844982446872,0.0013728448410516582399,0,0
6,1.7011125185213460398,-76.258022579203640134,0.0016779214723964710858,0,0
6,1.7003936232971643694,-77.9592094185629918,0.0016779214723964710858,0,0
6,1.6966331187944390102,-70.830289756977833804,0.0013728448410516582399,0,0
6,1.682979267677415125,-15.987071021732321086,0.0054913793642066329598,0,0
7,1.7363071699507339751,-20.327508191538829152,0.0015945900958022178346,0,0
7,1.7326907420756900713,-33.25464288519677325,0.0021355364194136907882,0,0
7,1.7280874723327293019,-54.700197496195968938,0.0025624246788417373751,0,0
7,1.7269892026947586405,2.9924747344551421158,0.00017664923685452183096,0,0
7,1.7259250875807186087,-79.950798349054508662,0.0009904771294426324181,0,0
7,1.7241177043483888465,-192.20631253897630586,0.0011819999007304804201,0,0
7,1.7207045899018496016,-129.05783684671547462,0.0016779214723964710858,0,0
7,1.7186521469647568772,-190.36819129711173559,0.0039659962074825678632,0,0
7,1.8010488388352685618,0.12310542209027797167,0.0053388410485342265369,1,1.999999999999999778
7,1.7712301130745953248,0.16820436926591131321,0.0015874929349540844482,1,1.999999999999999778
7,1.7699209603946546299,-0.25598163222923642213,0.0029400697010911109631,1,-1
7,1.7682531009657012078,0.13338868661604330601,0.00069669611408187503542,1,0.20000000000000006661
7,1.7668586614590284789,-0.15952413741399440461,0.0012613601761798693031,1,-0.43768162294892959396
7,1.7362441667172117121,7.8203789587320686749,0.0010445749914891520015,1,0.46114001920711938931
7,1.7352181941859836645,-21.099087917607324272,0.0020878605708172736331,1,0.64896129770100974277
7,1.7339788508263294098,-34.923023471180812294,0.0030758332620472094918,1,-0.37107251437958016504
7,1.732655759702412146,24.208582335842891098,0.001933084820695247499,1,0.1125080785337480016
7,1.731787048197323875,-9.6148341824869447692,0.0014204738011000099009,1,0.30309670915228931198
7,1.7307435412519922568,-34.45566798563205424,0.0034284855867759852187,1,-0.71450149835646747931
7,1.7293567194233276929,-31.416914086467176759,0.0029411812911977648632,1,0.0080226800825530519834
7,1.7285597173615416811,11.940475169093003771,0.0018806427595703784604,1,-0.85355016140961426085
7,1.7279793366882929551,-4.981722336731697176,0.00058279761044388025612,1,-0.47601482743602863135
7,1.7269471026739007247,49.078630760925818777,0.0012132807984106431121,1,0.014553144804108311683
7,1.7250847576304100262,52.024409681149307971,0.00097385175825910608172,1,-0.018475994122574973533
7,1.7243519111655454257,-3.8778903469066667853,0.00026938655719893226997,1,1
7,1.7240977902599683436,14.013754059578236166,0.00048734956169697239399,1,-0.60000000000000008882
7,1.7236071221922610874,-37.953224051230030511,0.00094431534648918200557,1,-0.80908707516717215391
7,1.7229340619491539943,39.988803130292524202,0.0011328418666409186336,1,0.66411194725382471926
7,1.7221915526833782017,-44.226958313139007828,0.0017994227134458086817,1,0.33867210296906130607
7,1.7217540859337490122,67.1666285554814948,0.0022766495560850204261,1,-0.015610406124922288074
7,1.7205183865306479252,106.81756066636479829,0.0018321985083269492697,1,0.18969402012389235956
7,1.7196148529954053963,48.628011090213561829,0.0017395333074946269045,1,0.087287752735600687704
7,1.7185969763731481219,-72.195955930767752307,0.0018045765513561241779,1,-0.074657982515623944053
7,1.7174094094323455462,63.755716731922184692,0.0033039286884990657321,1,0.62032373344825320061
7,1.714604332343238724,-62.858151169903379696,0.005234809847755306049,1,0.31607512987953095829
7,1.7121379276769503885,-29.950273997853685159,0.0041424109380381445716,1,0
7,1.711344440046495663,-10.28791516493627789,0.0023455435469206717923,1,0.027404579442466995426
7,1.7347420501675323568,40.818400717579116588,0.003813457891810161874,0,0
7,1.7306838790249463589,53.803051513011958207,0.0052050319323477672873,0,0
7,1.7272797241982134064,6.7241367158239278012,0.00061015326268962590851,0,0
7,1.7268050315918683779,3.6930398083021320765,0.00024446531399521022896,0,0
7,1.7263281097507841011,-3.8006966887060578131,0.00026261050525189574964,0,0
7,1.7259245841786277076,4.2115189774604511186,0.00026291935808315743985,0,0
7,1.7254999658039549271,-3.1278262970695545064,0.00028842602072025921422,0,0
7,1.7248767709922663283,6.5140883643024034555,0.00044370127915668996447,0,0
7,1.7235837910747284774,33.445518277771348892,0.0010162810506694887423,0,0
7,1.7223641164459932984,39.343879805259177829,0.0017054067974312644897,0,0
7,1.7183384450628429452,67.2411746493932867,0.0021778988120900082473,0,0
7,1.7133137912837494987,49.947831058297644802,0.0064431428010306790802,0,0
7,1.8060826032524579521,-0.22939243418902530158,0.050225637887759869149,1,0.60000000000000008882
7,1.7629400828410473068,-0.25268286989651983498,0.0034281399269405778661,1,-0.57850733232720430443
7,1.7367510123750979911,-11.796187006100392836,0.0023244814225502814266,1,-0.61824900264702742358
7,1.735381582089402519,1.5419182190304463465,0.00065274307192965386453,1,1.999999999999999778
7,1.7346036269144782249,-11.771055321261769677,0.004157866901036629502,1,-0.71395847721476524139
7,1.7337139623046995407,4.93283096438490265,0.0019862202250735274366,1,-0.098184040736177091713
7,1.7325772152614782318,-17.060656064183294944,0.0025554565568979481158,1,-0.35614147668394824375
7,1.7314203870962587839,5.7225667051450823664,0.0012351119866554080909,1,1.999999999999999778
7,1.7307106891337942223,-5.8782097897925034147,0.0017636804122343934312,1,1.0113741496388319874
7,1.7293421008554978879,21.128641657324582326,0.0030536998159321352211,1,0.63369797857852394607
7,1.7281326894134652061,3.3560576959776766692,0.00058904149411116637092,1,-0.98012825263928049502
7,1.7274529055748628625,-12.481376475258867842,0.0014144706402285300503,1,-0.86611243124888681599
7,1.7266442980654113093,-5.2748870815464270478,0.0014898558255561052469,1,1.999999999999999778
7,1.7259072434901976401,2.4354838960967488681,0.00034702237169800538141,1,1.9445552354420816421
7,1.7255067145033711196,-6.0993531990319018732,0.0013292512837580468341,1,-0.92207308425684009201
7,1.7249814377218553041,2.5799448768154422673,0.00056866408708680139545,1,0.64604659028201294468
7,1.7245792183769335093,-9.2855738760973309809,0.0016034963196247269037,1,0.45451494341880865901
7,1.7240169894207033607,5.2671855185813676314,0.00098136255856248830881,1,1.0319976479831574068
7,1.7232058692033653813,-24.348494190157243366,0.0015797053156159745861,1,0.30352974588726294725
7,1.7226007965702629932,5.4624950818729613999,0.0012149493940525732307,1,0.17560523834833752232
7,1.7222311206088505298,-15.830805676478547639,0.0015692492311642121123,1,0.91489689794294470904
7,1.7217232400019093497,18.42307536471146534,0.0015986403643831184271,1,-0.85881173066623128776
7,1.7210513148098942615,4.0204419589619755371,0.0038294012106063982787,1,-0.45039429409807757443
7,1.721003635770404383,-30.075630120322315975,0.0017236626664752833192,1,0.15362734580704590082
7,1.7199656558193423539,-32.32164881276855084,0.0020572113606742393685,1,-0.20559554220063336327
7,1.7192647132662581821,18.037133427665953178,0.0016631746442303174324,1,-0.44856365290896155207
7,1.7182151619264927067,-37.274414664246101836,0.0021361202941607274931,1,0.30898064401588049011
7,1.7170313154353533669,-23.238030084098973305,0.0020602369239417889744,1,0.2000000000000000111
7,1.7152127604637357194,35.543908360965012605,0.0036044863601834759882,1,0.44168543741617910525
7,1.7138749725472897101,-6.4613852315619002553,0.0015939989798368259417,1,1.3599116196323759453
7,1.7128942129675179817,-4.0095752096403982634,0.0012097100776674158101,1,0.10888778449139424609
7,1.7112791771522735118,15.274697026268555078,0.0031139712001409481854,1,0.099873323120519552631
7,1.7357994281587778573,0.71131749652400155792,0.00032959936972435359024,0,0
7,1.7336221452498190576,-2.6852249324546213494,0.0016133128534187145958,0,0
7,1.7295426252683678836,-17.863356942070684141,0.0034580057158102501559,0,0
7,1.7269380235706839333,-1.5117375525871044051,0.00034353865469057746993,0,0
7,1.726616336094837667,0.26843471967007753731,3.3958527772509806844e-05,0,0
7,1.7264169513638043529,-1.0468784678812659283,0.00011403867020505831557,0,0
7,1.7258892297987649123,-1.3257137417517572686,0.0006135049766336698367,0,0
7,1.7249518210872332169,-1.6557765314321715167,0.00080678083687392226301,0,0
7,1.7245896275225331973,-1.835783294120884479,0.00043084716288914069651,0,0
7,1.723989965983254713,-4.803670804122014637,0.00040582825814506376079,0,0
7,1.7219159395375642774,-18.068592035558229014,0.0016518776415951070668,0,0
7,1.7214006234117658067,-16.800090038192898589,0.00061015326268962590851,0,0
7,1.7191904927401047143,-21.534643420472214359,0.0021355364194136907882,0,0
7,1.7148797083146325448,-34.169072566655096068,0.0040389626036227109507,0,0
7,1.7115747472405880014,-15.519412233584638727,0.0024406130507585036341,0,0
8,1.7363071699507339751,-25.850972542285003186,0.0015945900958022178346,0,0
8,1.7326907420756900713,-53.595596383675427887,0.0021355364194136907882,0,0
8,1.7280874723327293019,-220.59365271968408706,0.0025624246788417373751,0,0
8,1.7269892026947586405,18.443439349192860988,0.00017664923685452183096,0,0
8,1.7259250875807186087,-586.89673852377052299,0.0009904771294426324181,0,0
8,1.7241177043483888465,-589.32428416261814164,0.0011819999007304804201,0,0
8,1.7207045899018496016,-41.606467852770705917,0.0016779214723964710858,0,0
8,1.7186521469647568772,-69.343400880653206286,0.0039659962074825678632,0,0
8,1.7371070860813773162,-15.95317779163110572,0.0017943762071689370406,1,0.53510665928139156122
8,1.7362441667172117121,9.9735913471024293386,0.0010445749914891520015,1,0.46114001920711938931
8,1.7352181941859836645,-28.318488549348455052,0.0020878605708172736331,1,0.64896129770100974277
8,1.7339788508263294098,-50.631491852729958225,0.0030758332620472094918,1,-0.37107251437958016504
8,1.732655759702412146,39.147296582105497009,0.001933084820695247499,1,0.1125080785337480016
8,1.731787048197323875,-17.074094869695173315,0.0014204738011000099009,1,0.30309670915228931198
8,1.7307435412519922568,-70.826635305665632814,0.0034284855867759852187,1,-0.71450149835646747931
8,1.7293567194233276929,-85.626662139042863942,0.0029411812911977648632,1,0.0080226800825530519834
8,1.7285597173615416811,40.900303131026134906,0.0018806427595703784604,1,-0.85355016140961426085
8,1.7279793366882929551,-20.913259593167133232,0.00058279761044388025612,1,-0.47601482743602863135
8,1.7269471026739007247,307.0381175728547305,0.0012132807984106431121,1,0.014553144804108311683
8,1.7250847576304100262,291.44743630979911586,0.00097385175825910608172,1,-0.018475994122574973533
8,1.7243519111655454257,-14.177625283048259419,0.00026938655719893226997,1,1
8,1.7240977902599683436,42.284519543762769445,0.00048734956169697239399,1,-0.60000000000000008882
8,1.7236071221922610874,-73.566367437995623391,0.00094431534648918200557,1,-0.80908707516717215391
8,1.7229340619491539943,39.656545789821919357,0.0011328418666409186336,1,0.66411194725382471926
8,1.7221915526833782017,-23.659737942249297049,0.0017994227134458086817,1,0.33867210296906130607
8,1.7217540859337490122,28.008433854299397581,0.0022766495560850204261,1,-0.015610406124922288074
8,1.7205183865306479252,34.185825302700230566,0.0018321985083269492697,1,0.18969402012389235956
8,1.7196148529954053963,16.217583273583468184,0.0017395333074946269045,1,0.087287752735600687704
8,1.7185969763731481219,-26.431709574699048915,0.0018045765513561241779,1,-0.074657982515623944053
8,1.7174094094323455462,25.784644869127617994,0.0033039286884990657321,1,0.62032373344825320061
8,1.714604332343238724,-29.901849543301089795,0.005234809847755306049,1,0.31607512987953095829
8,1.7369727987887908505,21.052061205145715661,0.001950354855943777074,0,0
8,1.7347420501675323568,56.303726485671546698,0.003813457891810161874,0,0
8,1.7306838790249463589,111.68474863614598291,0.0052050319323477672873,0,0
8,1.7272797241982134064,37.127152144836287562,0.00061015326268962590851,0,0
8,1.7268050315918683779,24.229377507635959432,0.00024446531399521022896,0,0
8,1.7263281097507841011,-27.823720545969827356,0.00026261050525189574964,0,0
8,1.7259245841786277076,30.913842440623362506,0.00026291935808315743985,0,0
8,1.7254999658039549271,-20.813429887376077687,0.00028842602072025921422,0,0
8,1.7248767709922663283,32.840283451224607347,0.00044370127915668996447,0,0
8,1.7235837910747284774,63.363214847085352233,0.0010162810506694887423,0,0
8,1.7223641164459932984,23.806570816759236919,0.0017054067974312644897,0,0
8,1.7183384450628429452,25.198561685943033694,0.0021778988120900082473,0,0
8,1.7133137912837494987,25.001440337522460311,0.0064431428010306790802,0,0
8,1.7367510123750979911,-14.717609720519661209,0.0023244814225502814266,1,-0.61824900264702742358
8,1.735381582089402519,2.0513620441923716697,0.00065274307192965386453,1,1.999999999999999778
8,1.7346036269144782249,-16.374482114979461045,0.004157866901036629502,1,-0.71395847721476524139
8,1.7337139623046995407,7.2908862536769722951,0.0019862202250735274366,1,-0.098184040736177091713
8,1.7325772152614782318,-27.799879696228327219,0.0025554565568979481158,1,-0.35614147668394824375
8,1.7314203870962587839,10.646214420795274691,0.0012351119866554080909,1,1.999999999999999778
8,1.7307106891337942223,-12.148210868643996463,0.0017636804122343934312,1,1.0113741496388319874
8,1.7293421008554978879,57.798932875894294625,0.0030536998159321352211,1,0.63369797857852394607
8,1.7281326894134652061,13.312687519095360855,0.00058904149411116637092,1,-0.98012825263928049502
8,1.7274529055748628625,-64.349433352159508104,0.0014144706402285300503,1,-0.86611243124888681599
8,1.7266442980654113093,-36.272971211722897067,0.0014898558255561052469,1,1.999999999999999778
8,1.7259072434901976401,17.840620905219296333,0.00034702237169800538141,1,1.9445552354420816421
8,1.7255067145033711196,-40.678983166550942485,0.0013292512837580468341,1,-0.92207308425684009201
8,1.7249814377218553041,13.734807394738982822,0.00056866408708680139545,1,0.64604659028201294468
8,1.7245792183769335093,-39.446438198639945938,0.0016034963196247269037,1,0.45451494341880865901
8,1.7240169894207033607,14.86706677665952725,0.00098136255856248830881,1,1.0319976479831574068
8,1.7232058692033653813,-31.577718832553667738,0.0015797053156159745861,1,0.30352974588726294725
8,1.7226007965702629932,3.9984835390535886646,0.0012149493940525732307,1,0.17560523834833752232
8,1.7222311206088505298,-8.7008705649406401506,0.0015692492311642121123,1,0.91489689794294470904
8,1.7217232400019093497,7.5746084761998524471,0.0015986403643831184271,1,-0.85881173066623128776
8,1.7210513148098942615,1.3478786059510576845,0.0038294012106063982787,1,-0.45039429409807757443
8,1.721003635770404383,-10.006041259672542765,0.0017236626664752833192,1,0.15362734580704590082
8,1.7199656558193423539,-10.502994966291565149,0.0020572113606742393685,1,-0.20559554220063336327
8,1.7192647132662581821,6.205254345789793291,0.0016631746442303174324,1,-0.44856365290896155207
8,1.7182151619264927067,-14.120645666059044032,0.0021361202941607274931,1,0.30898064401588049011
8,1.7170313154353533669,-9.6591246990493111468,0.0020602369239417889744,1,0.2000000000000000111
8,1.7152127604637357194,16.437326188742492405,0.0036044863601834759882,1,0.44168543741617910525
8,1.7138749725472897101,-3.1676937199270320811,0.0015939989798368259417,1,1.3599116196323759453
8,1.7128942129675179817,-2.0360413544346567249,0.0012097100776674158101,1,0.10888778449139424609
8,1.7357994281587778573,0.92637355769383822324,0.00032959936972435359024,0,0
8,1.7336221452498190576,-3.9965478379676491194,0.0016133128534187145958,0,0
8,1.7295426252683678836,-46.523737953853256499,0.0034580057158102501559,0,0
8,1.7269380235706839333,-9.4875890058165506247,0.00034353865469057746993,0,0
8,1.726616336094837667,1.8593766252910937098,3.3958527772509806844e-05,0,0
8,1.7264169513638043529,-7.56584910867609306,0.00011403867020505831557,0,0
8,1.7258892297987649123,-9.6887669884630334138,0.0006135049766336698367,0,0
8,1.7249518210872332169,-8.6824847834436340577,0.00080678083687392226301,0,0
8,1.7245896275225331973,-7.849037833130486419,0.00043084716288914069651,0,0
8,1.723989965983254713,-13.251531405311846257,0.00040582825814506376079,0,0
8,1.7219159395375642774,-8.1745013085257696162,0.0016518776415951070668,0,0
8,1.7214006234117658067,-6.1153944332961129859,0.00061015326268962590851,0,0
8,1.7191904927401047143,-7.4596466897802207185,0.0021355364194136907882,0,0
8,1.7148797083146325448,-16.053958359208223783,0.0040389626036227109507,0,0
9,1.7792709684559591121,-1.1206390498743841189,0.0024406130507585036341,0,0
9,1.7605295987419091741,-2.4817390812598159044,0.0022880747350860972111,0,0
9,1.7501948198588228589,-8.1035029155776516774,0.0021355364194136907882,0,0
9,1.7456450208637985799,-274.36662507696132707,0.0017984454426982377385,0,0
9,1.7444496536152624966,44.839269214279298126,0.00035698457060258424831,0,0
9,1.7436568090884771998,-112.59672693669028831,0.00061454857486039694055,0,0
9,1.7427529663254697212,165.93993120455979806,0.00058639032016073386333,0,0
9,1.7410090468543129028,-664.79941216937777426,0.0015574518062524381375,0,0
9,1.7391404386197610865,254.21804184623997003,0.0013869311633095187872,0,0
9,1.7363071699507339751,-109.09790850311641464,0.0015945900958022178346,0,0
9,1.7326907420756900713,-31.370512610120588448,0.0021355364194136907882,0,0
9,1.8114739727305306793,-0.37292834822171166964,0.0092466008939819099854,1,-1
9,1.8010488388352685618,0.1390420824141163636,0.0053388410485342265369,1,1.999999999999999778
9,1.797082842627786059,-0.19504389969635499424,0.0044653840842661957772,1,1.999999999999999778
9,1.7793429702400824777,0.78681571978698616743,0.0027726508308034093428,1,0.29665039459260145183
9,1.7756818844747694897,-0.64236952345049247448,0.0051353405210426356434,1,-0.21838465364361173138
9,1.7712301130745953248,0.30604400175790047456,0.0015874929349540844482,1,1.999999999999999778
9,1.7699209603946546299,-0.48477655438529443366,0.0029400697010911109631,1,-1
9,1.7682531009657012078,0.26709910424779853555,0.00069669611408187503542,1,0.20000000000000006661
9,1.7668586614590284789,-0.33626084793454147359,0.0012613601761798693031,1,-0.43768162294892959396
9,1.7603211085507359801,1.9514781682164672461,0.0027726508308034089091,1,-0.55075833963565323792
9,1.7569814749836090151,-1.8536486327944452501,0.0046412472164623699844,1,-1
9,1.7508225510509052292,7.2933761300055275356,0.0029018241223673310082,1,-1
9,1.7491438364182283483,19.391846188911280535,0.0025155926367458406046,1,-1
9,1.7468051471939263219,-62.119308206175787745,0.0023744428464811504105,1,-0.0072252493444674254983
9,1.7458299685618574593,14.542670343382242848,0.00033595327727337537553,1,0.3985823437057714469
9,1.7454384318976696733,-23.032661051629325755,0.00035309518131284174094,1,1.5609882559803287538
9,1.7445684599401427572,179.64121712426853605,0.0010801774639944401821,1,0.87407728556081987215
9,1.743464179093759947,-31.274971687388728014,0.00062843688705800974069,1,1.999999999999999778
9,1.7427578560856595846,171.8591793074207601,0.0013440903862484998056,1,1.7868352939887690578
9,1.7416647972321679383,-199.81055432186965959,0.00096951670725367003652,1,0.67705601011208771389
9,1.7405975394221206987,-176.39161346068647163,0.0011080206450560187246,1,0.66712915233314307173
9,1.7396532573291765278,146.80943186716945092,0.00085300800296888765716,1,1.2495474293777744101
9,1.7385227899425292897,152.43798022467328224,0.0018306477013667530034,1,1.0997561380834526279
9,1.7371070860813773162,-111.44036774890705033,0.0017943762071689370406,1,0.53510665928139156122
9,1.7362441667172117121,40.520786510318799856,0.0010445749914891520015,1,0.46114001920711938931
9,1.7352181941859836645,-63.638030116998550056,0.0020878605708172736331,1,0.64896129770100974277
9,1.7339788508263294098,-58.285161957482486628,0.0030758332620472094918,1,-0.37107251437958016504
9,1.732655759702412146,22.494908412924619512,0.001933084820695247499,1,0.1125080785337480016
9,1.731787048197323875,-6.1659241858807947168,0.0014204738011000099009,1,0.30309670915228931198
9,1.7307435412519922568,-14.209857028007679247,0.0034284855867759852187,1,-0.71450149835646747931
9,1.7470866155655380147,35.124871468812315811,0.0044676384415127121455,0,0
9,1.7461458981890172204,35.040182666924437171,0.00061015326268962590851,0,0
9,1.7455401367309568705,38.711462794394286391,0.00044080058183772408619,0,0
9,1.7447690742790917806,2.3633079691171254844,0.00018803083601541531597,0,0
9,1.7444622869139665422,-13.426050547054108719,0.00013998134439838214103,0,0
9,1.7436704210711104768,48.576773266027267084,0.00044080166038625923693,0,0
9,1.7429000982427611532,12.798701427492549243,0.00050972486036736602919,0,0
9,1.7409299569547289632,169.64290092268495869,0.0022953486775255534623,0,0
9,1.7369727987887908505,134.7297989445300459,0.001950354855943777074,0,0
9,1.7347420501675323568,97.434018303655847149,0.003813457891810161874,0,0
9,1.7306838790249463589,21.634479553830235687,0.0052050319323477672873,0,0
9,1.8060826032524579521,-0.24870090798711239066,0.050225637887759869149,1,0.60000000000000008882
9,1.7874422498931583636,-0.5686860526039566599,0.014782226231261791707,1,1.027782688816574197
9,1.7755692940841469873,0.4098600665502998841,0.0081712732999604329592,1,0.98038232286190707399
9,1.7629400828410473068,-0.63362530179016862686,0.0034281399269405778661,1,-0.57850733232720430443
9,1.758047479911641453,1.6039295508858366635,0.0034397265712139469575,1,-0.93865008713140341001
9,1.7495692358916430376,-10.052669754968718507,0.007573630903067723498,1,0.50613299859109983636
9,1.7461991753686276763,-18.680867453438505521,0.00047406208565608202879,1,-0.34424697701089840285
9,1.7448185330251644309,-48.701399556300714266,0.0034378346798172908574,1,1.6813369690509458731
9,1.7446089964452793364,3.6246918976094590903,0.00093719367356798481856,1,1.7060632906264558972
9,1.7442513934315053703,4.9203547789468888851,0.0010971523829979238501,1,1.999999999999999778
9,1.7437045350381505937,2.154405560345127757,0.0005548925359061071148,1,-1
9,1.7430434147313429438,-41.602944856613589764,0.00087025103144997126205,1,1.8998894852667094213
9,1.7423591637499069584,54.503616826090443226,0.00048687460272227604721,1,1.5519076733655829958
9,1.7416884606262492685,69.109426523332615488,0.00078258038299551123309,1,0.69262484397742829501
9,1.7410532732842343151,-20.606720745658783756,0.00066015229456626006027,1,1.525550635581686798
9,1.7407157822694498961,37.201399273125119294,0.0012583116178749560819,1,1.2780606590605085859
9,1.7397056651637941016,-72.80838204805442615,0.0013949796487719625521,1,0.98768654508834230477
9,1.7389359614618802308,-19.319275969756212419,0.0006222024474036174941,1,0.33154509752279082146
9,1.7384293132325545628,-39.972071768230094335,0.0014335534044196101677,1,0.58915494774575183357
9,1.7384146236139059738,2.7386222809441385095,0.00062286665065626630172,1,1.999999999999999778
9,1.7376788902304050044,9.8038358625451760275,0.0005143133465721360818,1,1.8998516916342813587
9,1.7367510123750979911,-81.731242997556421415,0.0023244814225502814266,1,-0.61824900264702742358
9,1.735381582089402519,5.0507780973616007714,0.00065274307192965386453,1,1.999999999999999778
9,1.7346036269144782249,-26.294078507419950341,0.004157866901036629502,1,-0.71395847721476524139
9,1.7337139623046995407,7.3003124904473084555,0.0019862202250735274366,1,-0.098184040736177091713
9,1.7325772152614782318,-15.325633855420550233,0.0025554565568979481158,1,-0.35614147668394824375
9,1.7314203870962587839,3.1424212602626653279,0.0012351119866554080909,1,1.999999999999999778
9,1.7307106891337942223,-2.3906935080122200254,0.0017636804122343934312,1,1.0113741496388319874
9,1.7783346309522700679,-0.48648170602485629743,0.0016779214723964710858,0,0
9,1.7595424840469733319,-1.0919841770478102561,0.0010677682097068453941,0,0
9,1.7465547264231515712,4.3975571515560094582,0.0014324651366897809754,0,0
9,1.7453763811329465749,6.1422873052670734495,0.00013498481614591332362,0,0
9,1.7444345934829015299,-7.1990991458138013925,0.00031168858638095801915,0,0
9,1.7437971773594969083,-9.5512530198113410052,0.00044299306327930408405,0,0
9,1.7422062998773049092,-61.011585095211614771,0.0012625516731674312973,0,0
9,1.7417243812102274347,-65.231779269777746322,0.0010677682097068453941,0,0
9,1.7406460478030680861,-41.842692435165112386,0.0006738691431724791979,0,0
9,1.739900642874063319,-3.9488799561559555507,0.0001956942246571178874,0,0
9,1.7388495197203404086,8.9288003137597780068,0.0012577991534720232673,0,0
9,1.737256249993148538,11.709651169930962666,0.0005752185813779351134,0,0
9,1.7357994281587778573,2.89475555743465085,0.00032959936972435359024,0,0
9,1.7336221452498190576,-3.8133569943025409366,0.0016133128534187145958,0,0
10,3.145543759538073747,-0.48540655117007963648,0.00061015326268962590851,0,0
10,2.5614815447025787165,-6.8365700425626325654,0.00076269157836203233143,0,0
10,2.5287386327479568493,-9.5279520102490344868,0.006864224205258290766,0,0
10,2.519245778598062202,-3.7307486250715125031,0.0019829981037412839316,0,0
10,2.5158324925406803096,-3.025671965099855143,0.005033764417189413691,0,0
10,2.485748413132049528,-31.56876013205331688,0.0035454106500797128582,0,0
10,2.4807644276596900745,23.522334019233422708,0.0039916778018704241263,0,0
10,2.4723337332482309137,-21.460145835702927997,0.0055178252518998643222,0,0
10,2.4613163318486668274,-6.7285496502013586451,0.0019829981037412839316,0,0
10,2.4571334617412357026,-6.8646400756505103757,0.00076269157836203233143,0,0
10,2.4469263949277824111,-2.8354157338285732592,0.0019829981037412839316,0,0
10,2.4287633940204904626,4.2736372733959999692,0.0057012446934472894508,0,0
10,2.4187785177640512835,3.4875852102333606553,0.0016779214723964710858,0,0
10,2.2990487211495711506,-3.8726822012251722605,0.00076269157836203233143,0,0
10,3.4605711482507071075,0.10333480328315285124,0.002742254445197101799,1,-1
10,3.1743442038238764979,0.25607697557943798206,0.01851687277701534462,1,-0.67374793823007828042
10,3.1577374496494208245,0.22779936508623829794,0.0035123723163369814995,1,0.40000000000000007772
10,3.1533003737467781846,-0.27092840394772305102,0.004335295223572175824,1,1.9897849430758760558
10,3.1493939648008160148,0.18982767957157536953,0.0027266874877518282837,1,-0.19377276359467698885
10,3.1463903511625006537,-0.29434925483851764882,0.0013901819758267023111,1,0.60000000000000008882
10,3.1455295008783412669,0.32420017433896813897,0.00057609609993017178459,1,1.8021757826772453193
10,3.1438541509489228432,-0.26951913950017070132,0.0031158063896812113885,1,1.8577245434182658723
10,3.1401167004241608005,0.21554270138342790375,0.004714287192989516026,1,-0.97503576095365573906
10,3.1335782820138380345,-0.42289949649178010249,0.014857880637146905073,1,-0.35421342392649152186
10,2.9538665732760986948,-0.39485950611248904485,0.001654128402048381935,1,-0.62285680307538338063
10,2.62745041132955226,0.41326729706401232889,0.0020797138186613131801,1,-1
10,2.5654183386696973734,-0.59261208793822928165,0.0030339087176672763918,1,-1
10,2.5614551136374572593,6.6205657888273936607,0.00080891146376428537789,1,0.25586982875537506166
10,2.5430278970171000807,-14.241768196736291685,0.12877029430389896891,1,-0.14333248140010082516
10,2.5373770994365747455,0.33826423581667974805,0.00082050083099833822416,1,-0.39233279025283640529
10,2.5296035173912008176,2.5921350318113227651,0.0036170353934234147214,1,-0.3814478614557311742
10,2.5279682185437000186,3.499156142924002566,0.0048899140846817767611,1,-0.75316835896261702388
10,2.5241896181614142947,-1.5442923802080656959,0.0073528164774344225915,1,0.89333960064943562784
10,2.5192100205471792407,3.5039465492518626633,0.0025003642260018124621,1,-0.68140990949330482174
10,2.5125428946251129325,4.3809688680698419816,0.012216807313969230489,1,0.73017632631698770052
10,2.485564683827269139,-10.641664596566020151,0.0020200728677930504529,1,-0.22106147119565749959
10,2.4844814218487103474,3.1025722350107902692,0.00127760910067864779,1,1.8288835380940597908
10,2.4830180781050930072,24.903476992175164639,0.0048932327451685899908,1,-0.57748750147493665974
10,2.4787919798783444314,10.653091789786872212,0.0043187648127740140003,1,0.36173495697501711899
10,2.4778267365029345015,-2.1171691408817405744,0.0043534465724378865539,1,1.999999999999999778
10,2.4737212304794211626,-3.1742158338864481237,0.0032007714045245443286,1,-1
10,2.4723275346927220397,2.7854570322537446359,0.0015286569557882909425,1,1.999999999999999778
10,2.4706117317071338846,-2.3462137612414442067,0.0013703116164556672536,1,1.1678975060094132221
10,2.4673127792602311814,8.1333618910301090921,0.0067346377076842531273,1,1.2357551716377905837
10,2.4629702291181581053,-4.460299369469255204,0.0031481659504678208457,1,-0.269121946529008782
10,2.4613536634581900664,4.9782938641682576986,0.0019804648791452925116,1,0.66640371530553244028
10,2.4586668766970007916,-6.3224479606211554383,0.0030993551964797337768,1,-0.40000000000000007772
10,2.4571369984279893828,5.5936526873763394718,0.00072811654192847172218,1,0.26917317045704403089
10,2.4564532872281139575,-0.79948060934393194721,0.00038398328939537909295,1,1.999999999999999778
10,2.45501823900244176,-5.0714995654826369176,0.0032630772717498371209,1,0.2000000000000000111
10,2.4537886408187650211,0.85098401329937622961,0.00072570411759843086053,1,1.999999999999999778
10,2.4519163675745363484,-3.0419474928740872777,0.0036622983596426347125,1,1.521386852519717614
10,2.4500993720213579685,1.4098889900200206604,0.00126480003560658881,1,-0.12372563728612354095
10,2.4488181918722196073,-2.6169960148916313614,0.0019650103761559784346,1,-0.54671331613418605588
10,2.4470077371694904933,2.0167385328472606787,0.0020737000658426229562,1,0.81819568799387187852
10,2.4442126981247684903,-2.3942533151716873796,0.0042782246364313795614,1,-0.35686813021889091102
10,2.4394846699092909148,2.6152183630024605776,0.010754670040493342215,1,-0.20606256683634119331
10,2.4362183852951688756,-1.0121893928225877968,0.002281816301857792547,1,-0.078661295466420033673
10,2.4310584514081927665,0.92727706790373487511,0.0013746383499106463229,1,-0.029132666862757866655
10,2.4271711480914808234,-2.1967323332004395908,0.014529235987383754339,1,-0.40000000000000007772
10,2.4206911886818263113,1.3415998833089546327,0.0021809354780127927081,1,-0.67154814693682363114
10,2.4187548962803218089,-1.9563112757503087202,0.001255063870992792702,1,1.2997645807878828172
10,2.4167292117687177999,1.633267503755035932,0.0025719176501795186843,1,-1
10,2.3847077752657184213,-0.69691582880534663769,0.0044352055999836836192,1,-0.81765771611164517196
10,2.3528002719909606455,-0.46519277471592312967,0.00035591407843590537521,1,1.836206926487423674
10,2.2990741152884845988,3.3264782181920065085,0.00084024861903254379446,1,0.37476614167514266107
10,2.2867620422809733505,-0.89000480491738753752,0.016133293299063197757,1,-0.4157339678683068529
10,2.0419565346279586748,0.37850428825412296696,0.013257731215952275189,1,-0.2000000000000000111
10,2.004370918693302972,0.52059520732549413591,0.01841088766891166642,1,-1
10,1.9557512774367011854,0.3363954661855831918,0.043191955088566130749,1,-0.80000000000000004441
10,1.9040177710667083311,0.15801870505009305012,0.0064284004461942715475,1,-0.36781065470800000661
10,2.5757624136182561969,-0.67238634962622290114,0.00061015326268962590851,0,0
10,2.5612298919264184782,-1.1286880760533355428,0.0014061990579142188973,0,0
10,2.5405740179212084051,-3.2252101320976787058,0.00061015326268962590851,0,0
10,2.5238020795043176747,2.0120462109258383521,0.0021355364194136907882,0,0
10,2.5163168711512722275,1.0332258868748531722,0.0016779214723964710858,0,0
10,2.5124804751387714852,0.73267635206362224931,0.0036609195761377554511,0,0
10,2.4855344532559469073,12.010407682531656803,0.0021885724800636873269,0,0
10,2.4790371846556285007,6.6058539918879324304,0.0016779214723964710858,0,0
10,2.4733801637017540642,8.0509434708199307806,0.0027456896821033164799,0,0
10,2.4633463559594366288,9.5786810021289152672,0.0021355364194136907882,0,0
10,2.4585507738033434144,10.076902639614681689,0.0027456896821033164799,0,0
10,2.4439638837201114185,5.6503101016980208371,0.0022880747350860972111,0,0
10,2.4268834194561081929,5.0900295019802728191,0.0015253831567240646629,0,0
10,2.3042709965444325704,-2.9525972448761801381,0.0015253831567240646629,0,0
10,3.1935791831437700949,0.17240853895932639617,0.0024625549438093727143,1,-1
10,3.1593474427401524451,-0.11489609782053671061,0.0057050660086781007294,1,-1
10,3.1490928098113966094,-0.15912955223484229195,0.0024883471369849131244,1,0.6927713556027134123
10,3.140182712123325004,-0.19789427447405821825,0.0038939925590362684318,1,-0.9314359229116382366
10,2.9539334286873164537,0.3381340735529033692,0.0011926990841929962974,1,-0.24826546087114470529
10,2.6136030837586878839,-0.4637973018117892976,0.0027193686832961286651,1,-1
10,2.5956209251728337151,0.43199526977485891432,0.010195150512056537842,1,-0.98693484256181762682
10,2.5777244142401993798,-0.27162705578206064461,0.0039983593908934304123,1,0.2925167367017820208
10,2.5757845224778077586,0.51245870053417696965,0.00056599986735505873354,1,0.77872400901092808656
10,2.5734486479759368649,-0.28037927764360448535,0.0072175347976489983431,1,-0.027007823825824825437
10,2.5692317965615076858,0.3074039356208083662,0.0043245116954343737828,1,0.21135351261585044735
10,2.5632976079228630972,-0.50634820072436270699,0.0017551241056200364218,1,0.78014752538535203641
10,2.5615542532737323178,0.73257508055016151705,0.00070232777189391487442,1,-0.90407295199995263424
10,2.5417683638736368046,-2.5741322532750192664,0.018681716173542594478,1,1.999999999999999778
10,2.5405655021020536743,2.8017396289419571609,0.00063201041941758412043,1,0.71317315347735255049
10,2.5367979555721618112,-0.97520005508413620809,0.015668348173484631519,1,1.9033302462441958891
10,2.5267972974847152656,1.5510385196788500917,0.0048094218895200543246,1,1.999999999999999778
10,2.5237480254147799386,-1.1440209391998699129,0.0017327880475616951137,1,0.40000000000000007772
10,2.5212929326719177858,1.8801368190300380423,0.0060069907736295261383,1,-0.47136735130027618279
10,2.5189298467078438115,0.81882879202911740268,0.0084651660921862097176,1,-0.25971616434617700309
10,2.5183966392476375695,-0.38970467860429525153,0.0012860006306044100867,1,0.78704461221858257325
10,2.5163539424146188495,-0.82876230027632347142,0.0015765443701583794611,1,-0.21725402118120343276
10,2.5152332328134754391,0.21934768961524747644,0.00065261265638100749483,1,-0.14852688876690767206
10,2.4857840906500618949,-2.8941197960287885493,0.0019933196936934840723,1,-0.24250513145343405297
10,2.48451231119629945,-1.883522016271839572,0.0020855151652065550584,1,-0.42738908058242380816
10,2.484049778640181394,3.2022845532492056897,0.002625017962019588879,1,0.56595051687830255638
10,2.4829607446791039926,4.4005756291811470859,0.0039176991344186881672,1,0.62535701242369023944
10,2.4826292915223544533,-2.1322203557810537333,0.0014711017208917564949,1,0.13488347983184384438
10,2.4805458229154599969,-2.2627167171055164729,0.0021382635651833229416,1,-0.039173793101929602067
10,2.4803788435536189283,4.864365978913091304,0.0038702482906898751265,1,-0.2738007800654906343
10,2.4790816519991154543,-5.8820368314730728798,0.0016061765006104777257,1,0
10,2.4790496475435235268,0.81017704017743741307,0.0067107649302152599935,1,1.999999999999999778
10,2.4776715364836654487,3.9233073587907840718,0.0014242518398934905528,1,1.4634634420354262208
10,2.4759981532423882555,8.4570928824819429082,0.0027161031253092448451,1,1.4901777110860292552
10,2.4734624070037458665,-6.6979846464619905433,0.0034885765988405714917,1,0.79802587870349062094
10,2.4704258459008641147,6.2755409767789060993,0.003340864260896673002,1,-0.26042936839170810481
10,2.4685645376047493649,-1.8346722868466134315,0.0019453994544149943481,1,-0.52353399569880720854
10,2.4658108185356160114,2.7894007284283066639,0.0024058126364993547529,1,1.108120103176324811
10,2.4634662323471112622,-7.2621053107947943772,0.0027736565425554803553,1,-0.41581852321401407968
10,2.4620049513340922509,1.4772049482377140883,0.0010897901806599167001,1,1.4804756297910173224
10,2.4607619238067353074,3.3921337312177972656,0.0025663869622594365563,1,1.999999999999999778
10,2.4584695755753318558,-6.681523921546883571,0.0023443436844310825903,1,0.80000000000000004441
10,2.452878084510698109,7.5810073667828641319,0.0094518879602484024566,1,1.999999999999999778
10,2.448564770690297987,1.2467432308174497546,0.001295154496426014195,1,0.49302665116901106535
10,2.4439352902663360467,-4.9330328368956886109,0.0029137569770139350178,1,-0.34797341070011617026
10,2.427371162986169395,5.5302250762012734597,0.047930013865337760259,1,1.999999999999999778
10,2.4269135480391521575,-4.4621147937135097195,0.0015144600054861241667,1,0
10,2.3576611527238795496,-0.58744610843356681595,0.01920094332611433155,1,-0.86072811063473553261
10,2.352805831612343912,0.45734440052102381946,0.00068614596322550606804,1,1.999999999999999778
10,2.337341987511460939,-2.9804763016147739485,0.28560463075238889941,1,-0.68922546386954897102
10,2.304272742238537397,2.6784609647127397558,0.0015818928864559621272,1,0
10,1.9624129685022702052,-0.24687866473197969674,0.013565655592495501694,1,-1
10,1.8944022880267812337,-0.15845507761827434812,0.078243232254445155283,1,1.999999999999999778
10,2.5461795581867927574,0.65469636410764098233,0.00061015326268962590851,0,0
10,2.5205940246283566886,-1.5661152529156752156,0.0049249401402486859755,0,0
10,2.4840874078552532822,-5.6389371755032859923,0.0019829981037412839316,0,0
10,2.4773547817789789427,-7.0787810517577627323,0.002593151366430910057,0,0
10,2.4701144592663926147,-1.7071035042640827495,0.0016300710017744515432,0,0
10,2.4681192348082925392,1.2534708516656984933,0.0012029290376286848243,0,0
10,2.4640146081230329678,3.4244450045312975206,0.0017057908799965231308,0,0
10,2.4589787744640259071,1.1200496595519249254,0.0014355398613091073685,0,0
10,2.4503900819433961367,-3.5225079268276804356,0.00061015326268962590851,0,0
10,2.4385486897965971131,-1.2975602851996526077,0.001220306525379251817,0,0
10,2.0011118989594058881,-1.2941901341474948417,0.00076269157836203233143,0,0
11,2.4955954781613121085,-460.00107780057061291,0.0028472912171301060537,0,0
11,2.4927644667332962136,4.1998916392206977477,0.00017087878554576012638,0,0
11,2.4916318516259576832,-165.10208932066396414,0.0011889454799456212857,0,0
11,2.4901801279884510087,1.4336005222983534413,4.3079242158351014496e-05,0,0
11,2.4889672041611947684,-63.512625578497626577,0.0013689577619433253471,0,0
11,2.485748413132049528,-120.42364327802130219,0.0035454106500797128582,0,0
11,2.4807644276596900745,17.606108278222126984,0.0039916778018704241263,0,0
11,2.4723337332482309137,-4.4706479009368260691,0.0055178252518998643222,0,0
11,2.4949596563010971728,-53.428014581692025331,0.0011922914619488472841,1,0.41248494252490697232
11,2.4938068388567091738,50.031988214028615403,0.001026308808961281507,1,1.4770318971597631297
11,2.4928196560351434385,145.54697565254608094,0.0015425073095195493498,1,0.44160196068444634854
11,2.491134961404161352,-53.02454522979327578,0.00074907182467280435372,1,0.9804815445555636888
11,2.4903983622261733899,124.90458499767886735,0.0014782911388598091347,1,0.055489227099655161202
11,2.4892514998364583256,-40.166228518026301231,0.00085769217974565538538,1,1.2720377320552800349
11,2.4888751405489375479,78.569459074270596943,0.0017386734518791448212,1,-0.22766065070233176826
11,2.4876590697683682585,-46.251271425965732931,0.0013703116164556672536,1,0.14740213143791075501
11,2.4868039645852668684,31.679096347090315078,0.0014705397604010787826,1,0.54309050414527981765
11,2.485564683827269139,-37.641085127821199308,0.0020200728677930504529,1,-0.22106147119565749959
11,2.4844814218487103474,7.1970140626315917132,0.00127760910067864779,1,1.8288835380940597908
11,2.4830180781050930072,35.008392560501150115,0.0048932327451685899908,1,-0.57748750147493665974
11,2.4787919798783444314,5.1657487394697128025,0.0043187648127740140003,1,0.36173495697501711899
11,2.4778267365029345015,-0.859272809176101382,0.0043534465724378865539,1,1.999999999999999778
11,2.4737212304794211626,-0.74635302154181748513,0.0032007714045245443286,1,-1
11,2.4723275346927220397,0.57999540470056409891,0.0015286569557882909425,1,1.999999999999999778
11,2.4706117317071338846,-0.43473209147036373512,0.0013703116164556672536,1,1.1678975060094132221
11,2.4957347569364061179,49.833791412348723782,0.0038464670977613624886,0,0
11,2.4933233094939888375,9.1167232987447217596,0.00054067293975008044998,0,0
11,2.492525864590957152,2.8284706010509581553,0.00047075782418064162759,0,0
11,2.4913016008858588357,54.758518953504264459,0.0010886605466928322549,0,0
11,2.4892220766484309813,59.813776255192635745,0.0016206900461372610468,0,0
11,2.4876047328763082334,62.674019896523574857,0.0018304597880688777255,0,0
11,2.4855344532559469073,41.961970972808344982,0.0021885724800636873269,0,0
11,2.4790371846556285007,3.3629178006754121277,0.0016779214723964710858,0,0
11,2.4733801637017540642,1.832919934196981071,0.0027456896821033164799,0,0
11,2.4949293985697620357,11.794917274302823884,0.0015445234268578584245,1,1.8355936679370259412
11,2.4936098614804107498,-19.492911903373475013,0.001403669730615809139,1,1.5663912937551565108
11,2.4923524854626144531,-22.890138298695461572,0.0017598677025888070403,1,0.90001129657563083697
11,2.491590963082668253,12.512926067439634537,0.0004925575477439011465,1,1.999999999999999778
11,2.4909618159856186104,14.48868811410591384,0.00038579334029221470578,1,1.6330681416957553154
11,2.4903312849717673672,-28.772340274027680351,0.0014139835642023419141,1,0.097135450077630858257
11,2.4893017191491666473,13.912591434498086329,0.00076978572936465996645,1,0.40342738179918086194
11,2.4886170872434831836,-46.853285129323502645,0.0020208026530848187917,1,-0.42532555282779849204
11,2.4876267778172929113,6.7924828902009570797,0.00046668572351405448973,1,-0.22650489158582862159
11,2.4871257533528146055,-18.436401265398103533,0.0016120345800508997097,1,-0.054814666145386672924
11,2.4862974941203788148,10.902066695985606515,0.0015628340140631136624,1,-0.96194599852847217925
11,2.4857840906500618949,-11.204424150095880108,0.0019933196936934840723,1,-0.24250513145343405297
11,2.48451231119629945,-4.4194228941481528139,0.0020855151652065550584,1,-0.42738908058242380816
11,2.484049778640181394,6.3556028842781735477,0.002625017962019588879,1,0.56595051687830255638
11,2.4829607446791039926,6.0754791125081535341,0.0039176991344186881672,1,0.62535701242369023944
11,2.4826292915223544533,-2.657823363536465866,0.0014711017208917564949,1,0.13488347983184384438
11,2.4805458229154599969,-1.605992098703843407,0.0021382635651833229416,1,-0.039173793101929602067
11,2.4803788435536189283,3.3181768832188658358,0.0038702482906898751265,1,-0.2738007800654906343
11,2.4790816519991154543,-3.0214395771010584824,0.0016061765006104777257,1,0
11,2.4790496475435235268,0.4134831986395968717,0.0067107649302152599935,1,1.999999999999999778
11,2.4776715364836654487,1.5504199675697847294,0.0014242518398934905528,1,1.4634634420354262208
11,2.4759981532423882555,2.5886130741667283672,0.0027161031253092448451,1,1.4901777110860292552
11,2.4734624070037458665,-1.5365664496750597312,0.0034885765988405714917,1,0.79802587870349062094
11,2.4704258459008641147,1.1502937544446709683,0.003340864260896673002,1,-0.26042936839170810481
11,2.4953507493834083952,-12.613557310067699646,0.0019490433240023235812,0,0
11,2.4935216612335096009,-3.0981737711055270523,0.00038408354793493723871,0,0
11,2.4930505677647789575,1.5473126609461727021,0.00023015893648062492717,0,0
11,2.4928034399755012451,-0.8679052780992975169,6.9257485298524610229e-05,0,0
11,2.4925826013311449536,1.1160543908213367281,0.00026784136218971176099,0,0
11,2.49142283133755571,-8.5617066839320763449,0.00039224409964957410862,0,0
11,2.4903049245082047314,0.99369748681013647662,0.00031778135598614756828,0,0
11,2.4893776026444438543,-10.682480836040943117,0.0007388406143422412975,0,0
11,2.4876380205128163503,-7.4498757205409038562,0.00066556858381869115314,0,0
11,2.4862175490896332164,-11.234266519825212072,0.0013463053264664967459,0,0
11,2.4840874078552532822,-11.341684914465210099,0.0019829981037412839316,0,0
11,2.4773547817789789427,-2.6535483651013200834,0.002593151366430910057,0,0
11,2.4701144592663926147,-0.30750581363098927756,0.0016300710017744515432,0,0
12,3.145543759538073747,-0.21889608544368141518,0.00061015326268962590851,0,0
12,2.5614815447025787165,-4.5834979001885454153,0.00076269157836203233143,0,0
12,2.5287386327479568493,-9.2840745179627681694,0.006864224205258290766,0,0
12,2.519245778598062202,-4.6742964233969264143,0.0019829981037412839316,0,0
12,2.5158324925406803096,-4.315794084732024416,0.005033764417189413691,0,0
12,2.4955954781613121085,-2594.2196728224607796,0.0028472912171301060537,0,0
12,2.4927644667332962136,24.812982141017098314,0.00017087878554576012638,0,0
12,2.4916318516259576832,-687.75464824306584433,0.0011889454799456212857,0,0
12,2.4901801279884510087,2.3968968252653080064,4.3079242158351014496e-05,0,0
12,2.4889672041611947684,-64.368066299863230029,0.0013689577619433253471,0,0
12,2.485748413132049528,-126.66490407939868135,0.0035454106500797128582,0,0
12,2.4807644276596900745,27.086563716530097423,0.0039916778018704241263,0,0
12,2.4723337332482309137,-8.7306356284609165641,0.0055178252518998643222,0,0
12,2.4613163318486668274,-1.9876352721048486938,0.0019829981037412839316,0,0
12,2.4571334617412357026,-1.9404480756168622779,0.00076269157836203233143,0,0
12,2.4469263949277824111,-0.78125854687473161864,0.0019829981037412839316,0,0
12,2.4287633940204904626,1.2471101024611255248,0.0057012446934472894508,0,0
12,2.4187785177640512835,1.0557380471994257665,0.0016779214723964710858,0,0
12,2.2990487211495711506,-1.4344543334299102444,0.00076269157836203233143,0,0
12,3.1455295008783412669,0.14619955390913957904,0.00057609609993017178459,1,1.8021757826772453193
12,3.1438541509489228432,-0.1215554549520303923,0.0031158063896812113885,1,1.8577245434182658723
12,3.1401167004241608005,0.097237823122458766356,0.004714287192989516026,1,-0.97503576095365573906
12,3.1335782820138380345,-0.19087417319938393412,0.014857880637146905073,1,-0.35421342392649152186
12,2.9538665732760986948,-0.18154973601367066505,0.001654128402048381935,1,-0.62285680307538338063
12,2.62745041132955226,0.22325460206010724895,0.0020797138186613131801,1,-1
12,2.5654183386696973734,-0.38807542860001076335,0.0030339087176672763918,1,-1
12,2.5614551136374572593,4.4394198390714922908,0.00080891146376428537789,1,0.25586982875537506166
12,2.5373770994365747455,0.28462569011095700811,0.00082050083099833822416,1,-0.39233279025283640529
12,2.5296035173912008176,2.4822565542251049386,0.0036170353934234147214,1,-0.3814478614557311742
12,2.5279682185437000186,3.4649412657966056628,0.0048899140846817767611,1,-0.75316835896261702388
12,2.5241896181614142947,-1.6708330613818289656,0.0073528164774344225915,1,0.89333960064943562784
12,2.5192100205471792407,4.3954971138319445245,0.0025003642260018124621,1,-0.68140990949330482174
12,2.5125428946251129325,7.3044070630823032531,0.012216807313969230489,1,0.73017632631698770052
12,2.5107702239499118946,-0.14044343923012975184,0.0016753882478004800995,1,5.5511151231257827021e-17
12,2.5086126517200346697,3.3595304529091762902,0.0019769382026246840912,1,1.3542751554883276643
12,2.4987870107477134773,126.02563293766526442,0.0020538345341966266454,1,1.999999999999999778
12,2.49675652579914642,-473.99029310250222125,0.0017802373947094359777,1,0.6422624347832421865
12,2.4949596563010971728,-308.98869928452603517,0.0011922914619488472841,1,0.41248494252490697232
12,2.4938068388567091738,298.43863413515663296,0.001026308808961281507,1,1.4770318971597631297
12,2.4928196560351434385,864.11336195954118011,0.0015425073095195493498,1,0.44160196068444634854
12,2.491134961404161352,-163.81833445371765379,0.00074907182467280435372,1,0.9804815445555636888
12,2.4903983622261733899,237.98754663358866424,0.0014782911388598091347,1,0.055489227099655161202
12,2.4892514998364583256,-44.108573324255267778,0.00085769217974565538538,1,1.2720377320552800349
12,2.4888751405489375479,77.956550809921310474,0.0017386734518791448212,1,-0.22766065070233176826
12,2.4876590697683682585,-41.499414286960551124,0.0013703116164556672536,1,0.14740213143791075501
12,2.4868039645852668684,29.960629541247449481,0.0014705397604010787826,1,0.54309050414527981765
12,2.485564683827269139,-40.359632325588982837,0.0020200728677930504529,1,-0.22106147119565749959
12,2.4844814218487103474,8.5881473679183955028,0.00127760910067864779,1,1.8288835380940597908
12,2.4830180781050930072,47.092856748396400235,0.0048932327451685899908,1,-0.57748750147493665974
12,2.4787919798783444314,8.6325952089941520029,0.0043187648127740140003,1,0.36173495697501711899
12,2.4778267365029345015,-1.4831310099205112785,0.0043534465724378865539,1,1.999999999999999778
12,2.4737212304794211626,-1.4228451487188769065,0.0032007714045245443286,1,-1
12,2.4723275346927220397,1.1327740762012739051,0.0015286569557882909425,1,1.999999999999999778
12,2.4706117317071338846,-0.87086559119171191856,0.0013703116164556672536,1,1.1678975060094132221
12,2.4673127792602311814,2.69177182567144202,0.0067346377076842531273,1,1.2357551716377905837
12,2.4629702291181581053,-1.3502127085099151493,0.0031481659504678208457,1,-0.269121946529008782
12,2.4613536634581900664,1.471348404426579437,0.0019804648791452925116,1,0.66640371530553244028
12,2.4586668766970007916,-1.8111383779441345698,0.0030993551964797337768,1,-0.40000000000000007772
12,2.4571369984279893828,1.5812171993370220946,0.00072811654192847172218,1,0.26917317045704403089
12,2.4564532872281139575,-0.22488278668429717566,0.00038398328939537909295,1,1.999999999999999778
12,2.45501823900244176,-1.4144445882460860986,0.0032630772717498371209,1,0.2000000000000000111
12,2.4537886408187650211,0.23605227883267351774,0.00072570411759843086053,1,1.999999999999999778
12,2.4519163675745363484,-0.83926675157498209501,0.0036622983596426347125,1,1.521386852519717614
12,2.4500993720213579685,0.38806214046910192383,0.00126480003560658881,1,-0.12372563728612354095
12,2.4488181918722196073,-0.72011440466440090891,0.0019650103761559784346,1,-0.54671331613418605588
12,2.4470077371694904933,0.55563109254182696528,0.0020737000658426229562,1,0.81819568799387187852
12,2.4442126981247684903,-0.66282149550030966534,0.0042782246364313795614,1,-0.35686813021889091102
12,2.4394846699092909148,0.73370260021577982101,0.010754670040493342215,1,-0.20606256683634119331
12,2.4362183852951688756,-0.28720459214407983994,0.002281816301857792547,1,-0.078661295466420033673
12,2.4310584514081927665,0.26823946743700211037,0.0013746383499106463229,1,-0.029132666862757866655
12,2.4271711480914808234,-0.64491838611044316476,0.014529235987383754339,1,-0.40000000000000007772
12,2.4206911886818263113,0.40338547933875579243,0.0021809354780127927081,1,-0.67154814693682363114
12,2.4187548962803218089,-0.59225007371501392495,0.001255063870992792702,1,1.2997645807878828172
12,2.4167292117687177999,0.49791710796195237654,0.0025719176501795186843,1,-1
12,2.3847077752657184213,-0.23173141796059001929,0.0044352055999836836192,1,-0.81765771611164517196
12,2.3528002719909606455,-0.16325536718846206385,0.00035591407843590537521,1,1.836206926487423674
12,2.2990741152884845988,1.2321153037744783099,0.00084024861903254379446,1,0.37476614167514266107
12,2.2867620422809733505,-0.33251397068811011648,0.016133293299063197757,1,-0.4157339678683068529
12,2.0419565346279586748,0.15255407484661240303,0.013257731215952275189,1,-0.2000000000000000111
12,2.5757624136182561969,-0.41819787991821644191,0.00061015326268962590851,0,0
12,2.5612298919264184782,-0.75792050787413922652,0.0014061990579142188973,0,0
12,2.5405740179212084051,-2.601693086191541493,0.00061015326268962590851,0,0
12,2.5238020795043176747,2.1990197699814029164,0.0021355364194136907882,0,0
12,2.5163168711512722275,1.4443628038181905993,0.0016779214723964710858,0,0
12,2.5124804751387714852,1.2256652883783318853,0.0036609195761377554511,0,0
12,2.5000039373314488778,8.7916677896397690262,0.000706812368758152074,0,0
12,2.4957347569364061179,279.20856428286981554,0.0038464670977613624886,0,0
12,2.4933233094939888375,54.919878191916062349,0.00054067293975008044998,0,0
12,2.492525864590957152,16.183557763452501632,0.00047075782418064162759,0,0
12,2.4913016008858588357,188.21215430760543086,0.0010886605466928322549,0,0
12,2.4892220766484309813,65.072580932272956034,0.0016206900461372610468,0,0
12,2.4876047328763082334,56.313732065413475425,0.0018304597880688777255,0,0
12,2.4855344532559469073,45.13425264355894484,0.0021885724800636873269,0,0
12,2.4790371846556285007,5.5696953736520180556,0.0016779214723964710858,0,0
12,2.4733801637017540642,3.5162223539036676634,0.0027456896821033164799,0,0
12,2.4633463559594366288,2.9175827127320870247,0.0021355364194136907882,0,0
12,2.4585507738033434144,2.8834158347325651306,0.0027456896821033164799,0,0
12,2.4439638837201114185,1.5651055172985866015,0.0022880747350860972111,0,0
12,2.4268834194561081929,1.4959580904019182945,0.0015253831567240646629,0,0
12,2.3042709965444325704,-1.0893040679462817621,0.0015253831567240646629,0,0
12,3.1935791831437700949,0.077500663570997316287,0.0024625549438093727143,1,-1
12,3.140182712123325004,-0.089275657216700346486,0.0038939925590362684318,1,-0.9314359229116382366
12,2.9539334286873164537,0.15546684901984331173,0.0011926990841929962974,1,-0.24826546087114470529
12,2.6136030837586878839,-0.25717326548439811695,0.0027193686832961286651,1,-1
12,2.5956209251728337151,0.25036988705177398717,0.010195150512056537842,1,-0.98693484256181762682
12,2.5777244142401993798,-0.16752742437254536378,0.0039983593908934304123,1,0.2925167367017820208
12,2.5757845224778077586,0.31869830027415535501,0.00056599986735505873354,1,0.77872400901092808656
12,2.5734486479759368649,-0.17621146905760451395,0.0072175347976489983431,1,-0.027007823825824825437
12,2.5692317965615076858,0.19720807248586327831,0.0043245116954343737828,1,0.21135351261585044735
12,2.5632976079228630972,-0.33570769656848720164,0.0017551241056200364218,1,0.78014752538535203641
12,2.5615542532737323178,0.49092163841596703211,0.00070232777189391487442,1,-0.90407295199995263424
12,2.5417683638736368046,-2.0466466880778986237,0.018681716173542594478,1,1.999999999999999778
12,2.5405655021020536743,2.2603290481069007178,0.00063201041941758412043,1,0.71317315347735255049
12,2.5367979555721618112,-0.82734422536123630731,0.015668348173484631519,1,1.9033302462441958891
12,2.5267972974847152656,1.5757997677287531868,0.0048094218895200543246,1,1.999999999999999778
12,2.5237480254147799386,-1.2521155215412065331,0.0017327880475616951137,1,0.40000000000000007772
12,2.5212929326719177858,2.2056999222759015034,0.0060069907736295261383,1,-0.47136735130027618279
12,2.5189298467078438115,1.0371419946126452238,0.0084651660921862097176,1,-0.25971616434617700309
12,2.5183966392476375695,-0.50299496743476335148,0.0012860006306044100867,1,0.78704461221858257325
12,2.5163539424146188495,-1.1567835773084900186,0.0015765443701583794611,1,-0.21725402118120343276
12,2.5152332328134754391,0.32107252993824347831,0.00065261265638100749483,1,-0.14852688876690767206
12,2.5112066247761255511,-2.2677728212834442623,0.0091448903963844748594,1,1.6449661688383994118
12,2.509700825529697088,0.14153208624471810828,0.00054581786819565608279,1,-0.012088807658638898654
12,2.4993652965089276918,-17.762357387774443396,0.001032566794878372711,1,-0.47616382857390404659
12,2.4985140442580155984,17.182333783123709736,0.0007428590602587733507,1,1.8878685300281004
12,2.4971349560314739513,90.938622360558383662,0.002287880019085698248,1,1.999999999999999778
12,2.4949293985697620357,68.280851155312078049,0.0015445234268578584245,1,1.8355936679370259412
12,2.4936098614804107498,-116.84820790807692958,0.001403669730615809139,1,1.5663912937551565108
12,2.4923524854626144531,-126.33292239585890115,0.0017598677025888070403,1,0.90001129657563083697
12,2.491590963082668253,50.988169844403962827,0.0004925575477439011465,1,1.999999999999999778
12,2.4909618159856186104,39.919607328759425968,0.00038579334029221470578,1,1.6330681416957553154
12,2.4903312849717673672,-52.608114485690421702,0.0014139835642023419141,1,0.097135450077630858257
12,2.4893017191491666473,15.533020343221760839,0.00076978572936465996645,1,0.40342738179918086194
12,2.4886170872434831836,-44.323787293819094657,0.0020208026530848187917,1,-0.42532555282779849204
12,2.4876267778172929113,6.0994421834450784914,0.00046668572351405448973,1,-0.22650489158582862159
12,2.4871257533528146055,-16.98684238782696454,0.0016120345800508997097,1,-0.054814666145386672924
12,2.4862974941203788148,10.828712236115036305,0.0015628340140631136624,1,-0.96194599852847217925
12,2.4857840906500618949,-11.741093147433296906,0.0019933196936934840723,1,-0.24250513145343405297
12,2.48451231119629945,-5.2586574605698137574,0.0020855151652065550584,1,-0.42738908058242380816
12,2.484049778640181394,7.8812383214575882917,0.002625017962019588879,1,0.56595051687830255638
12,2.4829607446791039926,8.206311416771503886,0.0039176991344186881672,1,0.62535701242369023944
12,2.4826292915223544533,-3.6733734838254648025,0.0014711017208917564949,1,0.13488347983184384438
12,2.4805458229154599969,-2.4968411300368238415,0.0021382635651833229416,1,-0.039173793101929602067
12,2.4803788435536189283,5.1990014594637328216,0.0038702482906898751265,1,-0.2738007800654906343
12,2.4790816519991154543,-4.9958309298777994201,0.0016061765006104777257,1,0
12,2.4790496475435235268,0.68449670843179388768,0.0067107649302152599935,1,1.999999999999999778
12,2.4776715364836654487,2.6889395037732026772,0.0014242518398934905528,1,1.4634634420354262208
12,2.4759981532423882555,4.7000109371628528976,0.0027161031253092448451,1,1.4901777110860292552
12,2.4734624070037458665,-2.9433219089702586935,0.0034885765988405714917,1,0.79802587870349062094
12,2.4704258459008641147,2.3100595877304894721,0.003340864260896673002,1,-0.26042936839170810481
12,2.4685645376047493649,-0.62971497319066582765,0.0019453994544149943481,1,-0.52353399569880720854
12,2.4658108185356160114,0.89050568482834036033,0.0024058126364993547529,1,1.108120103176324811
12,2.4634662323471112622,-2.2164382094391754663,0.0027736565425554803553,1,-0.41581852321401407968
12,2.4620049513340922509,0.44061184823651583509,0.0010897901806599167001,1,1.4804756297910173224
12,2.4607619238067353074,0.99478715052855892775,0.0025663869622594365563,1,1.999999999999999778
12,2.4584695755753318558,-1.9103834031432873619,0.0023443436844310825903,1,0.80000000000000004441
12,2.452878084510698109,2.0965196488000694686,0.0094518879602484024566,1,1.999999999999999778
12,2.448564770690297987,0.34308704585544230747,0.001295154496426014195,1,0.49302665116901106535
12,2.4439352902663360467,-1.3665137668448732455,0.0029137569770139350178,1,-0.34797341070011617026
12,2.427371162986169395,1.6223413364328298503,0.047930013865337760259,1,1.999999999999999778
12,2.4269135480391521575,-1.3112651771294281389,0.0015144600054861241667,1,0
12,2.3576611527238795496,-0.20476534299134227513,0.01920094332611433155,1,-0.86072811063473553261
12,2.352805831612343912,0.16049984155663163388,0.00068614596322550606804,1,1.999999999999999778
12,2.304272742238537397,0.98816540030844945974,0.0015818928864559621272,1,0
12,2.5461795581867927574,0.49599564794573491877,0.00061015326268962590851,0,0
12,2.5205940246283566886,-1.877375410259063182,0.0049249401402486859755,0,0
12,2.5092778726407951595,0.41631483108670641613,0.0013726709560451593687,0,0
12,2.5000250213231405283,-1.318080045971895764,0.00020258820807244042744,0,0
12,2.4996297702730316814,0.58581927390124288735,0.00018555762913963821242,0,0
12,2.4982481016341600011,-23.913938848327138231,0.0010670825984295418277,0,0
12,2.4975118109496130536,-44.220926746801559659,0.00091522989403443886277,0,0
12,2.4964419998892104502,-74.255884323006242198,0.0013728448410516582399,0,0
12,2.4953507493834083952,-71.897077862236002943,0.0019490433240023235812,0,0
12,2.4935216612335096009,-18.607929983524890361,0.00038408354793493723871,0,0
12,2.4930505677647789575,9.3000742468103272387,0.00023015893648062492717,0,0
12,2.4928034399755012451,-5.1458038682395965679,6.9257485298524610229e-05,0,0
12,2.4925826013311449536,6.4457036168564538769,0.00026784136218971176099,0,0
12,2.49142283133755571,-31.689792445853051106,0.00039224409964957410862,0,0
12,2.4903049245082047314,1.7881470616378436489,0.00031778135598614756828,0,0
12,2.4893776026444438543,-12.245383812777960841,0.0007388406143422412975,0,0
12,2.4876380205128163503,-6.6878252740968928691,0.00066556858381869115314,0,0
12,2.4862175490896332164,-11.250755270917004225,0.0013463053264664967459,0,0
12,2.4840874078552532822,-14.018631363593089034,0.0019829981037412839316,0,0
12,2.4773547817789789427,-4.6459478926039627922,0.002593151366430910057,0,0
12,2.4701144592663926147,-0.62007301102002609916,0.0016300710017744515432,0,0
12,2.4681192348082925392,0.42434903457248429604,0.0012029290376286848243,0,0
12,2.4640146081230329678,1.0551830137052888858,0.0017057908799965231308,0,0
12,2.4589787744640259071,0.32184724598656677674,0.0014355398613091073685,0,0
12,2.4503900819433961367,-0.9697529743970390026,0.00061015326268962590851,0,0
12,2.4385486897965971131,-0.36517115600556487864,0.001220306525379251817,0,0
13,2.5006833977827591653,56.904981110712533621,0.0017173109522839833264,1,0.5945072321784266034
13,2.4987870107477134773,161.43325837070830175,0.0020538345341966266454,1,1.999999999999999778
13,2.5000039373314488778,19.029414196785790381,0.000706812368758152074,0,0
13,2.5006738117094950979,3.0394613579210871812,0.00057517670354097888939,1,0.57893832415004742309
13,2.5001964922405011116,-10.123799295687486932,0.0012722956965530969956,1,-0.87991585911026293232
13,2.4993652965089276918,-33.088793195052382146,0.001032566794878372711,1,-0.47616382857390404659
13,2.4985140442580155984,16.941855025648084876,0.0007428590602587733507,1,1.8878685300281004
13,2.5007151301624661599,-2.8949537932532645179,0.00068157611044294876684,0,0
13,2.5000250213231405283,-2.8550012348295830122,0.00020258820807244042744,0,0
13,2.4996297702730316814,1.1960660065657737761,0.00018555762913963821242,0,0
13,2.4982481016341600011,-17.667468554389170521,0.0010670825984295418277,0,0
13,2.4975118109496130536,-14.206047930530017354,0.00091522989403443886277,0,0
14,2.5614815447025787165,-5.8866951906634916725,0.00076269157836203233143,0,0
14,2.5287386327479568493,-16.90911287241815586,0.006864224205258290766,0,0
14,2.519245778598062202,-11.506015651464117866,0.0019829981037412839316,0,0
14,2.5158324925406803096,-12.802202922913577865,0.005033764417189413691,0,0
14,2.5057657465828802046,-297.66396458518153167,0.0021772086157706310207,0,0
14,2.5020502440101735075,-661.05419939399303075,0.0017430700986237820937,0,0
14,2.4955954781613121085,-995.23751806224959182,0.0028472912171301060537,0,0
14,2.4469263949277824111,-0.47427198605866605075,0.0019829981037412839316,0,0
14,2.4287633940204904626,0.8455820744272908307,0.0057012446934472894508,0,0
14,2.4187785177640512835,0.74431987462159365787,0.0016779214723964710858,0,0
14,2.2990487211495711506,-1.1892689776207165941,0.00076269157836203233143,0,0
14,3.1438541509489228432,-0.11584162570138580028,0.0031158063896812113885,1,1.8577245434182658723
14,3.1401167004241608005,0.092684709725063652019,0.004714287192989516026,1,-0.97503576095365573906
14,3.1335782820138380345,-0.18199816449650807471,0.014857880637146905073,1,-0.35421342392649152186
14,2.9538665732760986948,-0.17538964219785943555,0.001654128402048381935,1,-0.62285680307538338063
14,2.62745041132955226,0.24233055178031054355,0.0020797138186613131801,1,-1
14,2.5654183386696973734,-0.48892006312500391196,0.0030339087176672763918,1,-1
14,2.5614551136374572593,5.7024343753702044779,0.00080891146376428537789,1,0.25586982875537506166
14,2.5373770994365747455,0.44695353475366433882,0.00082050083099833822416,1,-0.39233279025283640529
14,2.5296035173912008176,4.4381702059629057899,0.0036170353934234147214,1,-0.3814478614557311742
14,2.5279682185437000186,6.421178709511709215,0.0048899140846817767611,1,-0.75316835896261702388
14,2.5241896181614142947,-3.4214385881565130276,0.0073528164774344225915,1,0.89333960064943562784
14,2.5192100205471792407,10.837530191160311688,0.0025003642260018124621,1,-0.68140990949330482174
14,2.5125428946251129325,28.178651320045336348,0.012216807313969230489,1,0.73017632631698770052
14,2.5107702239499118946,-0.66027187612909066239,0.0016753882478004800995,1,5.5511151231257827021e-17
14,2.5086126517200346697,21.942432708636641081,0.0019769382026246840912,1,1.3542751554883276643
14,2.507381761956191113,-12.016441844936450067,0.0010700364894935122505,1,1.3999999999999999112
14,2.5059456816068195195,39.642447522806392612,0.0010932944472654756041,1,0.30710291697637226438
14,2.5046435223635565848,201.52397435745180587,0.0013516436818530406377,1,-0.31375971244931005755
14,2.5033914911837551465,-400.68143368021492279,0.0013896186800470679366,1,1.0249009377131512721
14,2.5021404930535915412,114.24571849881712637,0.00082679212830550090265,1,1.5198557058025341515
14,2.5016256113983490472,-48.920965304619571157,0.00092395640606045465783,1,-1
14,2.5006833977827591653,278.31411272407348179,0.0017173109522839833264,1,0.5945072321784266034
14,2.4987870107477134773,337.94115644045371027,0.0020538345341966266454,1,1.999999999999999778
14,2.49675652579914642,-360.01404466360185097,0.0017802373947094359777,1,0.6422624347832421865
14,2.4949596563010971728,-82.444570128982320512,0.0011922914619488472841,1,0.41248494252490697232
14,2.4938068388567091738,41.571385562379404632,0.001026308808961281507,1,1.4770318971597631297
14,2.4537886408187650211,0.1341830467129223603,0.00072570411759843086053,1,1.999999999999999778
14,2.4519163675745363484,-0.48666584085055419884,0.0036622983596426347125,1,1.521386852519717614
14,2.4500993720213579685,0.22906816827778833656,0.00126480003560658881,1,-0.12372563728612354095
14,2.4488181918722196073,-0.43010039552578710476,0.0019650103761559784346,1,-0.54671331613418605588
14,2.4470077371694904933,0.33707488011195185784,0.0020737000658426229562,1,0.81819568799387187852
14,2.4442126981247684903,-0.41104171301806124994,0.0042782246364313795614,1,-0.35686813021889091102
14,2.4394846699092909148,0.46996564392042999847,0.010754670040493342215,1,-0.20606256683634119331
14,2.4362183852951688756,-0.18757730917157341977,0.002281816301857792547,1,-0.078661295466420033673
14,2.4310584514081927665,0.17995188115687479891,0.0013746383499106463229,1,-0.029132666862757866655
14,2.4271711480914808234,-0.4403336475047666676,0.014529235987383754339,1,-0.40000000000000007772
14,2.4206911886818263113,0.28249958391430074478,0.0021809354780127927081,1,-0.67154814693682363114
14,2.4187548962803218089,-0.41758373140812143909,0.001255063870992792702,1,1.2997645807878828172
14,2.4167292117687177999,0.35344445477718072768,0.0025719176501795186843,1,-1
14,2.3847077752657184213,-0.17718746652296699096,0.0044352055999836836192,1,-0.81765771611164517196
14,2.3528002719909606455,-0.1300978692621660715,0.00035591407843590537521,1,1.836206926487423674
14,2.2990741152884845988,1.0215009923242297507,0.00084024861903254379446,1,0.37476614167514266107
14,2.2867620422809733505,-0.27739677395720646613,0.016133293299063197757,1,-0.4157339678683068529
14,2.0419565346279586748,0.13431850603180445214,0.013257731215952275189,1,-0.2000000000000000111
14,2.5757624136182561969,-0.50555757851163130034,0.00061015326268962590851,0,0
14,2.5612298919264184782,-0.97469179182777487824,0.0014061990579142188973,0,0
14,2.5405740179212084051,-3.9265343081904422462,0.00061015326268962590851,0,0
14,2.5238020795043176747,4.5568719370319508144,0.0021355364194136907882,0,0
14,2.5163168711512722275,4.1549370296086847176,0.0016779214723964710858,0,0
14,2.5124804751387714852,4.757451640529684056,0.0036609195761377554511,0,0
14,2.5074132786121143823,25.792121664926913382,0.0014170269747639664248,0,0
14,2.5030569931981250242,228.21738875789537815,0.0021851149252193930068,0,0
14,2.5017124850567862282,101.45370249835451659,0.0010677682097068453941,0,0
14,2.5000039373314488778,52.387641979270483716,0.000706812368758152074,0,0
14,2.4957347569364061179,116.10443641625535349,0.0038464670977613624886,0,0
14,2.4439638837201114185,0.97237691273441173578,0.0022880747350860972111,0,0
14,2.4268834194561081929,1.022654222929937351,0.0015253831567240646629,0,0
14,2.3042709965444325704,-0.90051669986800120249,0.0015253831567240646629,0,0
14,3.1935791831437700949,0.073685178213210550391,0.0024625549438093727143,1,-1
14,3.140182712123325004,-0.085095080581815710219,0.0038939925590362684318,1,-0.9314359229116382366
14,2.9539334286873164537,0.15019074362209297591,0.0011926990841929962974,1,-0.24826546087114470529
14,2.6136030837586878839,-0.28462739426565003553,0.0027193686832961286651,1,-1
14,2.5956209251728337151,0.28652246099920952727,0.010195150512056537842,1,-0.98693484256181762682
14,2.5777244142401993798,-0.20118528411053854255,0.0039983593908934304123,1,0.2925167367017820208
14,2.5757845224778077586,0.38524348549990278245,0.00056599986735505873354,1,0.77872400901092808656
14,2.5734486479759368649,-0.21478754333982405522,0.0072175347976489983431,1,-0.027007823825824825437
14,2.5692317965615076858,0.24436095765050894202,0.0043245116954343737828,1,0.21135351261585044735
14,2.5632976079228630972,-0.4272263789747327567,0.0017551241056200364218,1,0.78014752538535203641
14,2.5615542532737323178,0.63026484644903024712,0.00070232777189391487442,1,-0.90407295199995263424
14,2.5417683638736368046,-3.0478960871052520609,0.018681716173542594478,1,1.999999999999999778
14,2.5405655021020536743,3.4116737042563110016,0.00063201041941758412043,1,0.71317315347735255049
14,2.5367979555721618112,-1.3094803850063703177,0.015668348173484631519,1,1.9033302462441958891
14,2.5267972974847152656,3.0036091560810085355,0.0048094218895200543246,1,1.999999999999999778
14,2.5237480254147799386,-2.5990485739238566865,0.0017327880475616951137,1,0.40000000000000007772
14,2.5212929326719177858,4.9836701683728161782,0.0060069907736295261383,1,-0.47136735130027618279
14,2.5189298467078438115,2.5908137137646845005,0.0084651660921862097176,1,-0.25971616434617700309
14,2.5183966392476375695,-1.2894173161101993852,0.0012860006306044100867,1,0.78704461221858257325
14,2.5163539424146188495,-3.3200807538591012857,0.0015765443701583794611,1,-0.21725402118120343276
14,2.5152332328134754391,0.99166392287778060144,0.00065261265638100749483,1,-0.14852688876690767206
14,2.5112066247761255511,-10.105138491720829563,0.0091448903963844748594,1,1.6449661688383994118
14,2.509700825529697088,0.77161242046996803001,0.00054581786819565608279,1,-0.012088807658638898654
14,2.506881409813245476,-20.026333348625392716,0.0031749901956358498982,1,1.5644153498461108587
14,2.5064579317177013706,7.0062938273270773948,0.0019601583150985553601,1,-1
14,2.5053217185993341687,-10.727169465837452123,0.00071629110030209071965,1,0.66167714737892913135
14,2.5041379192905015572,73.712511767927750839,0.0013965235000849157438,1,-0.22327400855810425329
14,2.5019196536402881215,-145.53454702655426445,0.001716447128351044054,1,0.098019599258445444523
14,2.5006738117094950979,14.714060087268038046,0.00057517670354097888939,1,0.57893832415004742309
14,2.5001964922405011116,-31.74919438196971555,0.0012722956965530969956,1,-0.87991585911026293232
14,2.4993652965089276918,-69.490473352742853308,0.001032566794878372711,1,-0.47616382857390404659
14,2.4985140442580155984,38.656704685276814359,0.0007428590602587733507,1,1.8878685300281004
14,2.4971349560314739513,86.763069169399400948,0.002287880019085698248,1,1.999999999999999778
14,2.4949293985697620357,17.909837778287926113,0.0015445234268578584245,1,1.8355936679370259412
14,2.452878084510698109,1.2035987690881755352,0.0094518879602484024566,1,1.999999999999999778
14,2.448564770690297987,0.20537648417010281876,0.001295154496426014195,1,0.49302665116901106535
14,2.4439352902663360467,-0.84917398507313179845,0.0029137569770139350178,1,-0.34797341070011617026
14,2.427371162986169395,1.1067429431688400321,0.047930013865337760259,1,1.999999999999999778
14,2.4269135480391521575,-0.89628140280911672289,0.0015144600054861241667,1,0
14,2.3576611527238795496,-0.16235025626769597484,0.01920094332611433155,1,-0.86072811063473553261
14,2.352805831612343912,0.12790127831099074029,0.00068614596322550606804,1,1.999999999999999778
14,2.304272742238537397,0.81690557446980804901,0.0015818928864559621272,1,0
14,2.5461795581867927574,0.70714199492438645223,0.00061015326268962590851,0,0
14,2.5205940246283566886,-4.3601306813165034981,0.0049249401402486859755,0,0
14,2.5092778726407951595,2.4250319385236376313,0.0013726709560451593687,0,0
14,2.5046684861753076845,-38.138992306828249923,0.0010708722608125142203,0,0
14,2.5021641728221704071,3.3260354248718804193,0.00024314936162786511694,0,0
14,2.5016922113616435475,9.2285441919368977892,0.00025176736091549797164,0,0
14,2.5007151301624661599,-14.652343730576973257,0.00068157611044294876684,0,0
14,2.5000250213231405283,-7.963252069369568531,0.00020258820807244042744,0,0
14,2.4996297702730316814,2.7286464354140629318,0.00018555762913963821242,0,0
14,2.4982481016341600011,-45.430195563794406155,0.0010670825984295418277,0,0
14,2.4975118109496130536,-53.098826337672605291,0.00091522989403443886277,0,0
14,2.4964419998892104502,-46.757973840156289214,0.0013728448410516582399,0,0
14,2.4953507493834083952,-23.962696142618707285,0.0019490433240023235812,0,0
14,2.4503900819433961367,-0.57085728557760906376,0.00061015326268962590851,0,0
14,2.4385486897965971131,-0.23526516035414263284,0.001220306525379251817,0,0
15,3.8530656261131319695,-21.493204457304941002,0.012813218516482142995,0,0
15,3.8231152819128246811,-19.326860105013516034,0.0027166616629235532804,0,0
15,3.8112900834092560132,-6.0336330148808343665,0.0051359069372574322337,0,0
15,3.7981945877917202559,-3.1872047604785684882,0.00061015326268962590851,0,0
15,3.7834679885791269172,-2.3586474256951133199,0.0010677682097068453941,0,0
15,3.7580829219543629982,-1.0093623184979894081,0.00091522989403443886277,0,0
15,3.6961678136280156082,-1.2064685375681638568,0.00076269157836203233143,0,0
15,3.145543759538073747,-0.29346521735869224301,0.00061015326268962590851,0,0
15,4.2765931638827527905,-1.8276567088167943176,0.44427786352564285766,1,1.999999999999999778
15,3.8918686267456483741,2.0221470321947889737,0.0091720444168349526959,1,-0.51630038430715063935
15,3.8678817826195968088,-20.283368516047620034,0.028681614952551049563,1,-0.12101097807928457017
15,3.8541442683577229467,8.1076664268938820612,0.0066862701693174032141,1,0.42341494987168548647
15,3.8503314457314496977,-3.4186270957935604997,0.0033440469501483916469,1,-0.33597651939476058658
15,3.8231412172403329564,-4.3899410574142434527,0.0018085221426476427373,1,0.87657149985325366615
15,3.8227916747573438272,2.9306997589818784,0.0012523652510335633696,1,-0.32183955011482895392
15,3.8212617805912532098,-1.2156889569020974395,0.0010662422619723201534,1,1.8365291197667170664
15,3.8202800682359807638,-1.8345300069674004284,0.0014007938010267048223,1,1.999999999999999778
15,3.8179104486558270715,0.48359907671280755181,0.011853528353703913709,1,-0.39999999999999996669
15,3.8173356228636445842,8.5336200419787395788,0.0096280137733629773261,1,-0.42305243256897351323
15,3.8078864141912602825,-1.8821029576839887199,0.0033677506134865576454,1,1.5999999999999998668
15,3.8025102692763410595,2.3874633513652576688,0.0070460605922128055276,1,1.1999999999999999556
15,3.7982017124915201656,2.7085257790887555807,0.00058934009172189260554,1,0.75481085538555525716
15,3.7946821131669925542,-2.1096045343344376199,0.013244249510682933046,1,1.7280895994747436095
15,3.7880129387840351107,0.87648184360762571021,0.0048267467387678357829,1,-1
15,3.7851309321358210802,-1.7622719781747071544,0.0075294384838672729146,1,-0.85802575482591714184
15,3.7835301792257070019,1.9739044080277181603,0.00091045296556577877053,1,0.84512025170369586835
15,3.7756696851329225595,-2.2732216814599337518,0.0098115580164795119372,1,1.8424851212581734305
15,3.7681091200939120789,2.1117805360908596946,0.0073007005712755713642,1,0.017668962757861866875
15,3.7587658994577846094,-0.87422632828864987875,0.0083908369556687494722,1,0.60184031610322286099
15,3.7557508602614415594,0.48990616861826108419,0.00078683570963087483881,1,-0.36145060901092818106
15,3.7453981839468046822,1.5948959545853846898,0.021565371321643888453,1,-0.60000000000000008882
15,3.6961725051334846093,0.96223827989391741422,0.00082755036259827467835,1,0.78343898106320719599
15,3.6815411944446956305,-1.3461142778086985228,0.14813557836804924772,1,-1
15,3.4605711482507071075,0.47979388877772993771,0.002742254445197101799,1,-1
15,3.1743442038238764979,0.18387868104761481702,0.01851687277701534462,1,-0.67374793823007828042
15,3.1533003737467781846,-0.17156001677520585358,0.004335295223572175824,1,1.9897849430758760558
15,3.1463903511625006537,-0.17885819076015593843,0.0013901819758267023111,1,0.60000000000000008882
15,3.1455295008783412669,0.19598700564823290371,0.00057609609993017178459,1,1.8021757826772453193
15,3.1438541509489228432,-0.16130954461664553934,0.0031158063896812113885,1,1.8577245434182658723
15,3.1401167004241608005,0.1261576285562353017,0.004714287192989516026,1,-0.97503576095365573906
15,3.1335782820138380345,-0.23804664179629558829,0.014857880637146905073,1,-0.35421342392649152186
15,3.9136945372309352997,-11.485931681247027569,0.00061015326268962590851,0,0
15,3.8947124732670626024,-11.965233850901668688,0.00091522989403443886277,0,0
15,3.8547808145923667666,-3.0660895930671632215,0.0042710728388273815764,0,0
15,3.850554558086547452,0.19127315335687539166,0.00096287192125311374304,0,0
15,3.8231037705636197188,2.226494753238586366,0.0011132073972909925941,0,0
15,3.8217361781124106201,-0.39230382415808262575,0.00047482608857476375861,0,0
15,3.8200298509616978926,1.1880798195228006175,0.0012858552139208567506,0,0
15,3.816810190405457881,-0.58379392256193707311,0.0014406955407322544118,0,0
15,3.8107932124653771666,2.9951515885940134254,0.001220306525379251817,0,0
15,3.7913994945623841204,3.2934221795062774696,0.001220306525379251817,0,0
15,3.7581037387866724764,1.4916021675814332692,0.0019829981037412839316,0,0
15,3.9204161967876838268,-10.836923376723182955,0.079863600164010825622,1,0.84284607579240500286
15,3.9137012309854539716,11.006287101706163867,0.00065373563859602763521,1,0.045331243486322891911
15,3.9090432535229253652,0.62600585859230828412,0.0041077199321375885976,1,1.999999999999999778
15,3.9025692138540124532,-0.83039177434445698989,0.016975274498373913584,1,-1
15,3.8947127144761362061,11.359892486657145128,0.00096332163255238661102,1,0.23285387555137820881
15,3.8905197143409053773,-4.4376634991837562438,0.028420055925769821537,1,1.999999999999999778
15,3.8699023751923165015,5.0423013841334984875,0.014783037409118540001,1,1.2696409176100638128
15,3.8628077098934001654,-0.98932644450429241267,0.0041622565105134071844,1,-0.11154914047972984414
15,3.8612313303067904435,0.36019587380896628259,0.00082048056685628972286,1,0.12127175922981109357
15,3.859590823105534696,-0.92542965944381216925,0.0025905063866380061317,1,0.25352332106480079954
15,3.8569400916645557587,-0.68960330080777176853,0.0024406130507585036341,1,0.84395531058349582132
15,3.854903745509617341,1.0525419003782321425,0.0027455780907406791141,1,-0.80000000000000004441
15,3.8531457842132539326,-0.6082711109826771656,0.0020812549835813819697,1,1.60406158221794648
15,3.8507996514118758569,1.0770691998046884041,0.0032150771726582598638,1,0.2000000000000000111
15,3.8228955940232536292,-0.14309536947798673356,0.00045513276834581375008,1,1.999999999999999778
15,3.8225142895984887126,1.2391686978695570787,0.0012029664094476769098,1,-0.017648952111834176337
15,3.8218764448633093522,-1.6642322580458090986,0.00090690730682066499416,1,0.76545827347750949876
15,3.8206202981182775247,0.60972883104757724659,0.00092713786252443509094,1,1.6954379076543366622
15,3.8195656992236810545,-0.6064501591122721802,0.0020595424092484590495,1,0.029325267163924376157
15,3.812338846481864163,1.1943404932090901927,0.0051090931094887716626,1,-1
15,3.8107846104997440406,-2.5954474678316818981,0.0011826335942833629631,1,0.2798882444259945812
15,3.8073853048744310534,1.23551790917193971,0.0026914082462710080951,1,-0.31715744612218682574
15,3.8036445538298395697,-1.5541256486123402603,0.0065235093910087907018,1,-1
15,3.8008706524750364153,0.68565487006414549409,0.0014898887814660086333,1,0.003660009404498746656
15,3.7991146348272235578,-0.918820552582067962,0.0017978750395482188604,1,0.2000000000000000111
15,3.7938255698794001169,1.9042663252159270915,0.0087170926726632212006,1,-0.63684770501243814778
15,3.7913909002555850059,-2.8592919038739132986,0.0012267696536768259424,1,0.80000000000000004441
15,3.7854749187925200715,1.2029097788856426554,0.0067252383123018568203,1,0
15,3.7819006346869428192,-0.53657165543683960074,0.0025999524834638041391,1,0.77336415815239589744
15,3.7766965424304657084,2.0091625999500801747,0.013378783748635856427,1,0.60000000000000008882
15,3.7646745764861568873,-0.9448864237356047191,0.010509338277702886741,1,0.60000000000000008882
15,3.7613187335413642565,0.50186990007918796941,0.0017378286783157059769,1,-0.92335397294442644878
15,3.7583054447616084381,-0.76797338998339848004,0.0016649820248490186398,1,1.999999999999999778
15,3.7525211184115172536,0.39627336254983264174,0.0014095544697049404523,1,-0.86218981704084063367
15,3.1935791831437700949,0.13891449174281805812,0.0024625549438093727143,1,-1
15,3.140182712123325004,-0.11587362221405504703,0.0038939925590362684318,1,-0.9314359229116382366
15,3.9786851076858362752,-2.0565672014392029077,0.00076269157836203233143,0,0
15,3.9350460982321724401,0.77720324298366139093,0.0010677682097068453941,0,0
15,3.8974936850004824329,0.97525383813472066308,0.00061015326268962590851,0,0
15,3.8668594654891856877,-3.1725740596724940623,0.00076269157836203233143,0,0
15,3.85488567258207393,-0.608203951970350154,0.0021908435292594756992,0,0
15,3.850470290833829079,-0.60937862600764214349,0.0021044803185677209666,0,0
15,3.8226092388131207578,-0.3677633681694401635,0.00066433922264411214131,0,0
15,3.8217472946007902124,0.63103755872707512076,0.00048554794883723053798,0,0
15,3.8205472425871978004,-0.46385541976188793267,0.0009862139016826837034,0,0
15,3.8040926162310029213,2.9401278663855121565,0.0015253831567240646629,0,0
15,3.7625811052222384312,1.4220268327708338596,0.00061015326268962590851,0,0
16,3.8530656261131319695,-39.966657957049122274,0.012813218516482142995,0,0
16,3.8394649971676440003,369.92919153789353004,0.002693755039052479934,0,0
16,3.8326879317264936908,-1584.5111701289192752,0.0037517684616693398533,0,0
16,3.8297258206846822581,70.151426400399472527,0.0003772260680220097741,0,0
16,3.8282361661210364545,-436.20625353936856072,0.0017299100845959832981,0,0
16,3.8259741693118782813,225.9460716631602395,0.0014942099837228837826,0,0
16,3.8231152819128246811,-153.91973926454133448,0.0027166616629235532804,0,0
16,3.8112900834092560132,-5.5007852322394361622,0.0051359069372574322337,0,0
16,3.7981945877917202559,-1.638542391447510127,0.00061015326268962590851,0,0
16,3.7834679885791269172,-1.0089055049798483221,0.0010677682097068453941,0,0
16,3.7580829219543629982,-0.4236866279756202891,0.00091522989403443886277,0,0
16,3.6961678136280156082,-0.55027737077496097218,0.00076269157836203233143,0,0
16,3.8918686267456483741,1.7708747394075339265,0.0091720444168349526959,1,-0.51630038430715063935
16,3.8678817826195968088,-24.068082076042649931,0.028681614952551049563,1,-0.12101097807928457017
16,3.8541442683577229467,14.377374253351772992,0.0066862701693174032141,1,0.42341494987168548647
16,3.8503314457314496977,-7.2901890505623443417,0.0033440469501483916469,1,-0.33597651939476058658
16,3.8483881381091822327,5.0998876142164881742,0.0030811739150964387139,1,-0.15402377185266666326
16,3.8465523435943516084,-3.9807739330430873537,0.0027382923254029478861,1,0.19999999999999995559
16,3.8401337483444208942,24.044941430976233931,0.00095719380373550063453,1,0.67079217597198026457
16,3.8394358030933748438,-15.469154350865586878,0.00079522880765624834147,1,1.4376683897934559031
16,3.8382496017283878054,153.01448818581502564,0.001945099478553046846,1,0.78346888938961534166
16,3.8360934947198570555,-159.72479754985096179,0.0019290630744224503655,1,0.74490168064924577873
16,3.8345842683750861468,-409.48145659364314497,0.0029983450208348641323,1,0.60963038689597892628
16,3.8328510507931712326,45.747656400465871229,0.00074703888974674025926,1,0.81156385283438459144
16,3.8322709664212419867,-173.28782075503855253,0.0017669425491178803681,1,-0.048523361427801073309
16,3.8314343496195286676,134.53112537407238847,0.0011487300771607900605,1,1.1584183480277947531
16,3.8298682003795136986,628.41001378905571073,0.0017945518376344400235,1,0.95767712846143515648
16,3.8282634467570750836,118.94641372850321659,0.00089696081390697581046,1,1.4237072792333740345
16,3.827505038922047742,-156.72089618765207319,0.0010630531162358703226,1,0.43116236286403725186
16,3.8265676409240665379,178.56192361863534757,0.0014259777062037100239,1,0.073186799698910759426
16,3.8258139011133351914,-9.9435701086766155044,0.00048900570807940081566,1,0.84444812001057600881
16,3.8251851280652084952,178.25346335558504052,0.0022013578456734398357,1,0.079525675199753620426
16,3.8231412172403329564,-35.260867488349965981,0.0018085221426476427373,1,0.87657149985325366615
16,3.8227916747573438272,21.028787874564539351,0.0012523652510335633696,1,-0.32183955011482895392
16,3.8212617805912532098,-5.5903476669928497955,0.0010662422619723201534,1,1.8365291197667170664
16,3.8202800682359807638,-6.580801393683208822,0.0014007938010267048223,1,1.999999999999999778
16,3.8179104486558270715,1.0504568147622252994,0.011853528353703913709,1,-0.39999999999999996669
16,3.8173356228636445842,16.711294104636071012,0.0096280137733629773261,1,-0.42305243256897351323
16,3.8078864141912602825,-1.3529628054821918326,0.0033677506134865576454,1,1.5999999999999998668
16,3.8025102692763410595,1.373643327196457653,0.0070460605922128055276,1,1.1999999999999999556
16,3.7982017124915201656,1.3926719673139429378,0.00058934009172189260554,1,0.75481085538555525716
16,3.7946821131669925542,-1.0133404070538316599,0.013244249510682933046,1,1.7280895994747436095
16,3.7880129387840351107,0.38697557246856628677,0.0048267467387678357829,1,-1
16,3.7851309321358210802,-0.76112372573747033577,0.0075294384838672729146,1,-0.85802575482591714184
16,3.7835301792257070019,0.84460778908295963685,0.00091045296556577877053,1,0.84512025170369586835
16,3.7756696851329225595,-0.94916361364127621592,0.0098115580164795119372,1,1.8424851212581734305
16,3.7681091200939120789,0.87878107517644732383,0.0073007005712755713642,1,0.017668962757861866875
16,3.7587658994577846094,-0.36665489161275799379,0.0083908369556687494722,1,0.60184031610322286099
16,3.7557508602614415594,0.20626416185018425775,0.00078683570963087483881,1,-0.36145060901092818106
16,3.7453981839468046822,0.68172491445082172845,0.021565371321643888453,1,-0.60000000000000008882
16,3.6961725051334846093,0.43888038256572831086,0.00082755036259827467835,1,0.78343898106320719599
16,3.4605711482507071075,0.24270828735378197072,0.002742254445197101799,1,-1
16,3.9136945372309352997,-8.8427829959358170697,0.00061015326268962590851,0,0
16,3.8947124732670626024,-10.25398349035027934,0.00091522989403443886277,0,0
16,3.8547808145923667666,-5.294955908220818408,0.0042710728388273815764,0,0
16,3.850554558086547452,0.40294926222361154844,0.00096287192125311374304,0,0
16,3.8484648910681231726,-0.57663029182365577174,0.00067553919263972108094,0,0
16,3.8466802051304198606,1.6641836928739168755,0.0017102921150583840198,0,0
16,3.8395119537167938795,13.743090065906311992,0.00073894875886837689712,0,0
16,3.8343151697361408381,208.84415085236071263,0.0024406130507585036341,0,0
16,3.8324932311572394994,181.34837032966885317,0.0015649233853691770727,0,0
16,3.8303364322021202781,-54.732484578045422552,0.00079692864250491626549,0,0
16,3.8297088274564448085,-53.815808098512285085,0.00061015326268962590851,0,0
16,3.8290410843594173684,-36.116723882913362331,0.001236958218399491008,0,0
16,3.8275280932279795998,100.54691449819134164,0.00083451023257689643971,0,0
16,3.825992579378785674,-21.947468928949795952,0.00089647442345498567183,0,0
16,3.8251387532713283512,-22.363043533433984322,0.0013521314052521383933,0,0
16,3.8231037705636197188,17.665068055932476199,0.0011132073972909925941,0,0
16,3.8217361781124106201,-2.0543353406885538348,0.00047482608857476375861,0,0
16,3.8200298509616978926,4.0169410356426817899,0.0012858552139208567506,0,0
16,3.816810190405457881,-1.045613414427785326,0.0014406955407322544118,0,0
16,3.8107932124653771666,2.619738121519478824,0.001220306525379251817,0,0
16,3.7913994945623841204,1.5077392983096162826,0.001220306525379251817,0,0
16,3.7581037387866724764,0.62609383530029660836,0.0019829981037412839316,0,0
16,3.9204161967876838268,-8.1195955203534850853,0.079863600164010825622,1,0.84284607579240500286
16,3.9137012309854539716,8.4732667876649827576,0.00065373563859602763521,1,0.045331243486322891911
16,3.9090432535229253652,0.49243057788125316199,0.0041077199321375885976,1,1.999999999999999778
16,3.9025692138540124532,-0.67616165198943767312,0.016975274498373913584,1,-1
16,3.8947127144761362061,9.7352000596526657716,0.00096332163255238661102,1,0.23285387555137820881
16,3.8905197143409053773,-3.9290874713074415148,0.028420055925769821537,1,1.999999999999999778
16,3.8699023751923165015,5.7570509408200649659,0.014783037409118540001,1,1.2696409176100638128
16,3.8628077098934001654,-1.3170075604118616219,0.0041622565105134071844,1,-0.11154914047972984414
16,3.8612313303067904435,0.50019118424019570757,0.00082048056685628972286,1,0.12127175922981109357
16,3.859590823105534696,-1.3482750460620416266,0.0025905063866380061317,1,0.25352332106480079954
16,3.8569400916645557587,-1.0967071140613331437,0.0024406130507585036341,1,0.84395531058349582132
16,3.854903745509617341,1.8086229041998680422,0.0027455780907406791141,1,-0.80000000000000004441
16,3.8531457842132539326,-1.1269672787444837692,0.0020812549835813819697,1,1.60406158221794648
16,3.8507996514118758569,2.2393610132179735395,0.0032150771726582598638,1,0.2000000000000000111
16,3.8482449944087351312,-1.2084205726955621341,0.002377053468501861503,1,-0.010242928415971200296
16,3.847372952156563386,1.4496427262939690639,0.0024301324560989257667,1,-1
16,3.8466713522470081799,-0.17718163863465830055,0.00053611578749699598419,1,1.999999999999999778
16,3.8460800647476030001,0.52964103376847937454,0.00099582195720983139597,1,-0.33201765380288045248
16,3.8400572226985127955,-6.5176081406624364334,0.0012233335405987435639,1,-1
16,3.8392304635023482007,1.2702879733442835608,0.00044562124235315392438,1,1.9294226378915595443
16,3.8387398369218952432,-9.2235250881749131224,0.0011322139088249408376,1,-0.82558387642792641081
16,3.8382937124044227417,-6.4707458378056941228,0.00093897196664407829147,1,-0.20206485529532550172
16,3.8370087914068786716,43.187836194526781242,0.0013701166967204996515,1,1.999999999999999778
16,3.8358162783041453991,112.77875909232501783,0.0017617685084052592259,1,0.74283797548319419057
16,3.8342863283244792427,-50.6561211947431147,0.0010020874669406209644,1,1.3546093623061976619
16,3.8334693568544122577,29.924312596136211084,0.00065317122671773282863,1,0.99539352291174076903
16,3.8326912787808269378,-99.533209718644528152,0.0011312077335894838229,1,-0.11440949419498164241
16,3.831946655041410299,4.4517363598933421542,0.00023793818149306364472,1,0.77085352493826997389
16,3.8315555134668350945,-47.738836155530790961,0.0012408844719469982326,1,0.78764730028710905341
16,3.8306298325807905947,-47.377673928935898573,0.0012408515950863700014,1,0.91925329212620365826
16,3.8296993677960009528,38.659210441100270828,0.0011910944460214840327,1,1.9273491537155695852
16,3.8285227486400579267,-44.35794860356216418,0.0010714638055434623758,1,-0.45884696641569089337
16,3.827367824227516202,28.051580476337878878,0.0015052282067929273479,1,0.62560341440596622942
16,3.8265762073942282129,-23.897288893143212363,0.00082829481465064070961,1,0.58271577020572318251
16,3.8256568421267078683,16.87418633217499675,0.00091156865449964282096,1,1.999999999999999778
16,3.8243835539487127662,-16.089502883204630734,0.0022472583147833129387,1,0.94831153873513174268
16,3.8234173340340098513,7.48032258361206015,0.00093346456955451439716,1,-0.2000000000000000111
16,3.8228955940232536292,-1.0612888857503315343,0.00045513276834581375008,1,1.999999999999999778
16,3.8225142895984887126,8.1553176608991471142,0.0012029664094476769098,1,-0.017648952111834176337
16,3.8218764448633093522,-9.0682743010804269801,0.00090690730682066499416,1,0.76545827347750949876
16,3.8206202981182775247,2.3767045949394547399,0.00092713786252443509094,1,1.6954379076543366622
16,3.8195656992236810545,-1.8448338779559296796,0.0020595424092484590495,1,0.029325267163924376157
16,3.812338846481864163,1.1992007844751439993,0.0051090931094887716626,1,-1
16,3.8107846104997440406,-2.2685559233850614014,0.0011826335942833629631,1,0.2798882444259945812
16,3.8073853048744310534,0.8644402871172126579,0.0026914082462710080951,1,-0.31715744612218682574
16,3.8036445538298395697,-0.92787661289359357752,0.0065235093910087907018,1,-1
16,3.8008706524750364153,0.37625778405890741851,0.0014898887814660086333,1,0.003660009404498746656
16,3.7991146348272235578,-0.48237293570147726784,0.0017978750395482188604,1,0.2000000000000000111
16,3.7938255698794001169,0.90208914635150838635,0.0087170926726632212006,1,-0.63684770501243814778
16,3.7913909002555850059,-1.3088514961327453179,0.0012267696536768259424,1,0.80000000000000004441
16,3.7854749187925200715,0.52070968083574709073,0.0067252383123018568203,1,0
16,3.7819006346869428192,-0.22782897054770137601,0.0025999524834638041391,1,0.77336415815239589744
16,3.7766965424304657084,0.84028989906687068245,0.013378783748635856427,1,0.60000000000000008882
16,3.7646745764861568873,-0.39393833410045697718,0.010509338277702886741,1,0.60000000000000008882
16,3.7613187335413642565,0.20987837540636161693,0.0017378286783157059769,1,-0.92335397294442644878
16,3.7583054447616084381,-0.32227312438909205827,0.0016649820248490186398,1,1.999999999999999778
16,3.7525211184115172536,0.16759495839528776306,0.0014095544697049404523,1,-0.86218981704084063367
16,3.1935791831437700949,0.072292996745144791348,0.0024625549438093727143,1,-1
16,3.9786851076858362752,-1.3513183534532420271,0.00076269157836203233143,0,0
16,3.9350460982321724401,0.55560717151755334431,0.0010677682097068453941,0,0
16,3.8974936850004824329,0.81968216004111960071,0.00061015326268962590851,0,0
16,3.8668594654891856877,-3.8441485494899407804,0.00076269157836203233143,0,0
16,3.85488567258207393,-1.0458651102565319491,0.0021908435292594756992,0,0
16,3.850470290833829079,-1.289650124603791248,0.0021044803185677209666,0,0
16,3.8471899156739430836,-0.87778107032998187176,0.0023331032698694631478,0,0
16,3.8397064410528907175,1.8745663099220928327,0.00061015326268962590851,0,0
16,3.8392342794213445423,3.1304906220842054765,0.0006953827817001210056,0,0
16,3.836654579019843414,-25.030750787984580086,0.0021626893765207882633,0,0
16,3.8340713118028708628,15.060175270550082871,0.00059788814961946501643,0,0
16,3.8314913202869536057,30.89613113783909526,0.00045761494701721943138,0,0
16,3.8309100823680539705,31.348371721602834583,0.00094367265875859660928,0,0
16,3.8296794889073058066,-12.546493880547329169,0.00032144898400516836584,0,0
16,3.8293270026976116149,-9.8071902267321622304,0.00043029363596491521917,0,0
16,3.8283428851030185669,11.722205222545083458,0.00026698736581810583908,0,0
16,3.8278702432475584239,5.4974759776000556855,9.5055956076884264732e-05,0,0
16,3.8274823979590744116,-10.982613011230252908,0.00033871895403400853692,0,0
16,3.8264247410863534427,3.1537483433160065083,0.0002650457961924979392,0,0
16,3.8255796742747554262,-9.6359704431143544667,0.00070260131701337374,0,0
16,3.8244723707608070384,7.4453454777547571908,0.001394353588417492117,0,0
16,3.8226092388131207578,-2.4922683689734279611,0.00066433922264411214131,0,0
16,3.8217472946007902124,3.3148375647380046161,0.00048554794883723053798,0,0
16,3.8205472425871978004,-1.7756623404718063775,0.0009862139016826837034,0,0
16,3.8040926162310029213,1.7832645972381324651,0.0015253831567240646629,0,0
16,3.7625811052222384312,0.59392976137064601438,0.00061015326268962590851,0,0
17,3.8530656261131319695,-67.791935206270451886,0.012813218516482142995,0,0
17,3.844699961763275109,346.17029597476829395,0.0011664359174827910841,0,0
17,3.843459137527691194,-151.57404831396567602,0.00068036546680194502114,0,0
17,3.8418758203911700377,-233.80532152594756212,0.00075206622767302097176,0,0
17,3.8394649971676440003,1828.5849001203130229,0.002693755039052479934,0,0
17,3.8918686267456483741,0.89820132075998904142,0.0091720444168349526959,1,-0.51630038430715063935
17,3.8678817826195968088,-17.767238782167463995,0.028681614952551049563,1,-0.12101097807928457017
17,3.8541442683577229467,21.750107200390168316,0.0066862701693174032141,1,0.42341494987168548647
17,3.8503314457314496977,-18.254735946537557822,0.0033440469501483916469,1,-0.33597651939476058658
17,3.8483881381091822327,19.442807225321974585,0.0030811739150964387139,1,-0.15402377185266666326
17,3.8465523435943516084,-27.630673635625051077,0.0027382923254029478861,1,0.19999999999999995559
17,3.8452890186348405166,46.546354297688623092,0.0008883837931169555422,1,1.8966248747584408818
17,3.8446871570153664521,-12.134925328442019321,0.00032632439038742785736,1,1.9646572398243868918
17,3.8436864421417724635,-160.66384740318363811,0.00079479431262302656716,1,1.899912956543032827
17,3.84164619172605315,-615.24294189544332312,0.0017270116547517149527,1,1.7203366275793330331
17,3.8401337483444208942,202.47258786319395085,0.00095719380373550063453,1,0.67079217597198026457
17,3.8394358030933748438,-74.708331863620941249,0.00079522880765624834147,1,1.4376683897934559031
17,3.8382496017283878054,300.71697593346635813,0.001945099478553046846,1,0.78346888938961534166
17,3.8360934947198570555,-77.72969761692260704,0.0019290630744224503655,1,0.74490168064924577873
17,3.8345842683750861468,-82.384371751009851437,0.0029983450208348641323,1,0.60963038689597892628
17,3.9136945372309352997,-3.9112673544785319102,0.00061015326268962590851,0,0
17,3.8947124732670626024,-5.0790772391670300223,0.00091522989403443886277,0,0
17,3.8547808145923667666,-7.5423438293076463523,0.0042710728388273815764,0,0
17,3.850554558086547452,0.97050285768597255309,0.00096287192125311374304,0,0
17,3.8484648910681231726,-2.1547992939205053986,0.00067553919263972108094,0,0
17,3.8466802051304198606,10.982759524957222297,0.0017102921150583840198,0,0
17,3.8454961405201486535,-4.6003472216896899027,0.00019975544377268510403,0,0
17,3.8449629450656970242,-3.4638612000723121298,0.00019143619842457845954,0,0
17,3.8443004329950367648,24.043263119474726608,0.0006146024681545200416,0,0
17,3.8439456702979386549,21.281733932771949469,0.00045761494701721943138,0,0
17,3.8435663718127091038,27.760447208583588719,0.00014286471030358781809,0,0
17,3.843131372307591942,-56.998992215951346907,0.00035427716442227739826,0,0
17,3.8419711992210583418,179.13341192074767605,0.0007708499485966676789,0,0
17,3.8407252353027270253,102.63629218429929324,0.0010073572686274962894,0,0
17,3.8395119537167938795,70.524977323687096487,0.00073894875886837689712,0,0
17,3.8343151697361408381,35.970489663793074442,0.0024406130507585036341,0,0
17,3.9204161967876838268,-3.4930854117831851013,0.079863600164010825622,1,0.84284607579240500286
17,3.9137012309854539716,3.7477133413540739681,0.00065373563859602763521,1,0.045331243486322891911
17,3.9090432535229253652,0.22270381382043058505,0.0041077199321375885976,1,1.999999999999999778
17,3.9025692138540124532,-0.31706298028365570429,0.016975274498373913584,1,-1
17,3.8947127144761362061,4.8221004633591837418,0.00096332163255238661102,1,0.23285387555137820881
17,3.8905197143409053773,-2.0171724743820416137,0.028420055925769821537,1,1.999999999999999778
17,3.8699023751923165015,4.0302659853384090738,0.014783037409118540001,1,1.2696409176100638128
17,3.8628077098934001654,-1.1537295164093377409,0.0041622565105134071844,1,-0.11154914047972984414
17,3.8612313303067904435,0.46921822540791724432,0.00082048056685628972286,1,0.12127175922981109357
17,3.859590823105534696,-1.3728205502181818343,0.0025905063866380061317,1,0.25352332106480079954
17,3.8569400916645557587,-1.3145707751564514876,0.0024406130507585036341,1,0.84395531058349582132
17,3.854903745509617341,2.5479115097126165956,0.0027455780907406791141,1,-0.80000000000000004441
17,3.8531457842132539326,-1.8942444245166849548,0.0020812549835813819697,1,1.60406158221794648
17,3.8507996514118758569,5.1769880953464095796,0.0032150771726582598638,1,0.2000000000000000111
17,3.8482449944087351312,-4.7865033032507824373,0.002377053468501861503,1,-0.010242928415971200296
17,3.847372952156563386,7.458720856854920811,0.0024301324560989257667,1,-1
17,3.8466713522470081799,-1.1733451131272831791,0.00053611578749699598419,1,1.999999999999999778
17,3.8460800647476030001,4.4863822171757892221,0.00099582195720983139597,1,-0.33201765380288045248
17,3.844849622417824353,-15.039924793136929537,0.0019118637402486117309,1,1.6987366562044863283
17,3.8440126771959439722,-11.350460966079776171,0.00051986176417119403081,1,1.999999999999999778
17,3.843462722616162619,10.746402068826288456,0.0003151663807287379492,1,1.8924227144234577747
17,3.843074882225443023,-33.191251795530618551,0.00064785750665539445191,1,1.9990235000097826834
17,3.842429904884438141,33.243537012597052183,0.00061414980216582717564,1,1.8624221007798047456
17,3.8415813412004822247,-44.895421911970530005,0.00083884447932921905097,1,1.6048602066825075063
17,3.8410373926187704186,20.63735049544543898,0.00030391386214164941475,1,-0.80412011205356193067
17,3.8400572226985127955,-51.682163856719149919,0.0012233335405987435639,1,-1
17,3.8392304635023482007,5.2151680132248445787,0.00044562124235315392438,1,1.9294226378915595443
17,3.8387398369218952432,-25.95996555710130238,0.0011322139088249408376,1,-0.82558387642792641081
17,3.8382937124044227417,-13.124507338094231201,0.00093897196664407829147,1,-0.20206485529532550172
17,3.8370087914068786716,36.909232931470995709,0.0013701166967204996515,1,1.999999999999999778
17,3.8358162783041453991,46.529916069150353053,0.0017617685084052592259,1,0.74283797548319419057
17,3.8342863283244792427,-8.5807272596592181202,0.0010020874669406209644,1,1.3546093623061976619
17,3.9350460982321724401,0.22798460046210100582,0.0010677682097068453941,0,0
17,3.8974936850004824329,0.39756415386527471645,0.00061015326268962590851,0,0
17,3.8668594654891856877,-2.9231992598543437012,0.00076269157836203233143,0,0
17,3.85488567258207393,-1.4757546462505968243,0.0021908435292594756992,0,0
17,3.850470290833829079,-3.1515029603509314704,0.0021044803185677209666,0,0
17,3.8471899156739430836,-4.8048444901707245691,0.0023331032698694631478,0,0
17,3.8456737078891713999,-3.513522132366639017,0.00032935606064511766672,0,0
17,3.8451879683664329512,3.236668127787551974,0.00026883513928670200142,0,0
17,3.8445548782149150391,5.4041912422814624151,0.00044701004588366510372,0,0
17,3.8438833541767145618,2.7056855693828891773,8.8999239511617210681e-05,0,0
17,3.8435782038733337096,-8.7640858885820271951,0.00022358313850064017326,0,0
17,3.8433518311939929291,2.6449886965500262193,4.9599710948674332212e-05,0,0
17,3.8432268555595938686,-1.9468908674115770197,7.4390329081720896046e-05,0,0
17,3.8431095143596443187,2.0329048711045980546,4.5260397508846352162e-05,0,0
17,3.8423538613054306623,-20.077626367979895861,0.00062052839069974086248,0,0
17,3.8418418117696413461,18.999459155739483407,0.00020898918327087235604,0,0
17,3.841536487482823059,-5.9913398109746767162,8.3127280311269915233e-05,0,0
17,3.8412647874377583435,9.8264398406142561271,0.00017219456446363945652,0,0
17,3.8409173168988410829,-6.7308307456047113959,0.00025211259021550621717,0,0
17,3.8404129520176448764,11.378986011160188596,0.00023351673917874497853,0,0
17,3.8397064410528907175,11.239327835956130386,0.00061015326268962590851,0,0
17,3.8392342794213445423,12.89082677768685059,0.0006953827817001210056,0,0
17,3.836654579019843414,-17.136297251729427416,0.0021626893765207882633,0,0
17,3.8340713118028708628,2.2531874945931313903,0.00059788814961946501643,0,0
18,4.0695257458629789937,-121.361889599361092,0.0041930542533991296827,0,0
18,4.0657123556289969102,-67.537279366757289267,0.0018496976481607108403,0,0
18,4.063416412831887925,18.917668163501904388,0.0013875646504413945235,0,0
18,4.0537229987050755753,34.547109489283116091,0.0010677682097068453941,0,0
18,4.0749095842895934894,-6.1143793463526190379,0.0049198093636063236836,1,-0.60000000000000008882
18,4.073172745423247143,-27.777119559186420616,0.0076503496745341775104,1,-0.13295377234497690599
18,4.0706115213500027039,13.16515816638520775,0.0035361235035142267978,1,-0.8267122034029155131
18,4.0693088448764394016,-32.825346020807231184,0.0024287074882343392436,1,-0.41061613905246979739
18,4.0683856426752154078,19.050948648254575346,0.0012902997057055221909,1,-0.20180787269198624534
18,4.0678115733244801788,-10.581903718516265656,0.00097950956462131795119,1,0.98512379827221363549
18,4.0668897879756640279,64.66044282369975349,0.0019456898977465639494,1,0.2108627482878950854
18,4.0656836250830119539,12.950748101732461492,0.00095526412102581170771,1,0.49876958360325218678
18,4.064995181230965926,-34.018378655473654248,0.001536228057640262731,1,0.73438952043551619653
18,4.063954751835418655,21.42780347147722253,0.0013556213422771157175,1,0.27675256709533807564
18,4.0629881382834094339,-28.03907355890384423,0.0038664530635638331806,1,-0.40426630081116632365
18,4.062908108372664806,8.1652399281636682815,0.0015457623989800753275,1,0.2000000000000000111
18,4.0608882328339772627,-57.383888911008639866,0.0050207365317341511035,1,-0.27727947399176167131
18,4.0564997322159701554,15.515657291405263507,0.0078819735868991512573,1,-1
18,4.053734684685367462,-33.709881808469909004,0.001104685724594746182,1,0.10888595250596594388
18,4.048445900297996225,26.582899466873477934,0.03471401594570277388,1,-0.49188491815420659625
18,4.0742147783446736042,17.565379839815470575,0.0063900223734885980981,0,0
18,4.0649189855644420888,54.715450243108712414,0.002593151366430910057,0,0
18,4.0617651753815939841,51.43535804769006603,0.0083377634262314093139,0,0
18,4.0429133817409486085,-0.52298552628673888876,0.00061015326268962590851,0,0
18,4.0329067214768228311,0.42025969032109283807,0.0010677682097068453941,0,0
18,4.0740288201885777042,-2.7106590420730962698,0.0022813783862352401098,1,0.95234177986845691688
18,4.0718268708552303181,23.276136818685895236,0.0049277557878791263327,1,-0.1201097317587423996
18,4.0692084406570305788,42.541872494961239681,0.0033423157870740511158,1,-0.024241204274068065688
18,4.067801322042889467,12.386566311307745991,0.00090309658053768946881,1,0.60591609660559608841
18,4.0670831458547134218,-10.8770070852757339,0.00093095061984078074889,1,1.1999999999999999556
18,4.0658251097338764524,-33.996424820195130678,0.0022073399587824787602,1,0.71684937722555186479
18,4.0641181544986570984,-41.083412573710646143,0.002787867289875735257,1,-0.51126144639372961276
18,4.0624663803230633974,6.0154806475718878289,0.0016194769841765056014,1,1.9590712866048218821
18,4.0613632822663987554,-7.8498299882955775431,0.0034974053191189130238,1,0
18,4.0594173234327532995,5.9117471814648316908,0.0025622828053213559697,1,0.37080971318220246058
18,4.0580031363680841849,2.5852580432840053248,0.0021934206439970377334,1,-0.31882082481385021211
18,4.056727032081076878,-5.34030541351044441,0.0032169503285985781398,1,1.2612985215043805987
18,4.05418239340116493,3.1916406953546747616,0.0017319413325974316632,1,-1
18,4.0536099520421435827,-0.68668373894091305765,0.00046341071044226923295,1,1.999999999999999778
18,4.0520492802116301334,2.3943571004469559327,0.0032759453516541334889,1,1.3714596297067986885
18,4.0447001307091081657,-1.9241806748964138674,0.011570875609818479998,1,1.999999999999999778
18,4.0428961903758890983,0.37913019894698202217,0.00066161911955009563516,1,0.26037718992353914294
18,4.0328613189890578639,-0.35206521961871378723,0.0013130296794239527079,1,1.1450736289610969898
18,4.0268879411270237512,0.40445293804748827515,0.04093882458721987555,1,-0.80000000000000004441
18,4.0711137167779201107,-31.910620438653065634,0.0079220497341333968866,0,0
18,4.0648408318254247718,-13.40626944056781511,0.0015253831567240646629,0,0
18,4.0626896652612387584,-13.284364788337379437,0.0027456896821033164799,0,0
18,4.0591774784441199131,-8.9429329535931483264,0.0050565733907282379295,0,0
18,4.0537845373060390486,-4.5786453201945160885,0.002593151366430910057,0,0
19,4.0831097144395958054,-20.410208556542819736,0.0017101778326666977528,0,0
19,4.0802512836880220348,-59.754625470752834815,0.0021355364194136907882,0,0
19,4.0775322845396528848,-74.902192545520975386,0.0032033046291205357486,0,0
19,4.0695257458629789937,-29.359423225446739991,0.0041930542533991296827,0,0
19,4.0537229987050755753,9.616753883425408489,0.0010677682097068453941,0,0
19,4.0830479547843170351,8.6998561107099980916,0.00095154550134856079498,1,1.0167730577981313189
19,4.0820009880328411711,-14.670977911310798092,0.0012349621021615058564,1,1.1999999999999999556
19,4.0807868928299839695,29.204448486953413777,0.0025860670787281225987,1,0.40000000000000007772
19,4.0799896968770337224,-4.7420121923132940722,0.0032718278078288989819,1,0.60000000000000008882
19,4.079201723168082161,41.939891714204030393,0.0029788517037780907343,1,-0.83193210955329499612
19,4.0783917796700981384,-14.966096962245782009,0.0019184362630379338081,1,-1
19,4.0773026714854463393,27.905026811906054718,0.0021206099450936139079,1,1.6816002475825289064
19,4.0749095842895934894,-29.324772937940224438,0.0049198093636063236836,1,-0.60000000000000008882
19,4.073172745423247143,-50.634905196502927538,0.0076503496745341775104,1,-0.13295377234497690599
19,4.0706115213500027039,5.8689693890036265245,0.0035361235035142267978,1,-0.8267122034029155131
19,4.0693088448764394016,-7.018947659965184549,0.0024287074882343392436,1,-0.41061613905246979739
19,4.0564997322159701554,3.3709159590315334043,0.0078819735868991512573,1,-1
19,4.053734684685367462,-9.3754034183127785695,0.001104685724594746182,1,0.10888595250596594388
19,4.048445900297996225,10.078207918196453008,0.03471401594570277388,1,-0.49188491815420659625
19,4.0820342150211654797,13.618848080489282637,0.0014394002476278756376,0,0
19,4.0782100639069600589,34.946912195111750066,0.0039322564098363006063,0,0
19,4.0742147783446736042,57.121128809573626484,0.0063900223734885980981,0,0
19,4.0823872367544629114,1.6709595881161836139,0.00055074227775517975696,1,1.5999999999999998668
19,4.0816127941816047198,5.0777324755108237397,0.0011795887360391407381,1,-1
19,4.0809239431208670368,-10.046745495711403962,0.0019125064305676123949,1,0.90646115170903440728
19,4.0799429617035931628,8.1606348794831422566,0.0014711017208917564949,1,0.28808134439730215259
19,4.0792163069805447151,-19.174196754567429224,0.0034892552840806770852,1,-1
19,4.0784259935993123491,4.0134536021873401523,0.00057843641173956658434,1,0.2000000000000000111
19,4.0775013619588209579,-39.190403024186984737,0.0040519349284186233218,1,-0.080518219689451192567
19,4.0755466013187175989,20.171626573974101859,0.0022769849465988636558,1,1.3999999999999999112
19,4.0740288201885777042,-7.9451476812546601991,0.0022813783862352401098,1,0.95234177986845691688
19,4.0718268708552303181,20.281226797284585217,0.0049277557878791263327,1,-0.1201097317587423996
19,4.0692084406570305788,8.5909798607018004191,0.0033423157870740511158,1,-0.024241204274068065688
19,4.05418239340116493,0.85733494567998491664,0.0017319413325974316632,1,-1
19,4.0536099520421435827,-0.19278059717404635864,0.00046341071044226923295,1,1.999999999999999778
19,4.0520492802116301334,0.74838190717978791966,0.0032759453516541334889,1,1.3714596297067986885
19,4.0447001307091081657,-0.84437768347366948252,0.011570875609818479998,1,1.999999999999999778
19,4.0819757110312639981,-7.6440473905054133752,0.0021355364194136907882,0,0
19,4.0799569327962901255,-16.114575055611247478,0.0021355364194136907882,0,0
19,4.0751076204423526406,-35.060747500934915877,0.0038192483106404004692,0,0
19,4.0711137167779201107,-18.790651073453240372,0.0079220497341333968866,0,0
19,4.0537845373060390486,-1.2686031524829337602,0.002593151366430910057,0,0
20,4.0872032777090545608,-426.91759544453350372,0.0040396326622116800545,0,0
20,4.0831097144395958054,-151.47495698614483217,0.0017101778326666977528,0,0
20,4.0802512836880220348,-66.18350129438579188,0.0021355364194136907882,0,0
20,4.0775322845396528848,-30.885470889649049298,0.0032033046291205357486,0,0
20,4.0695257458629789937,-25.001046319546556873,0.0041930542533991296827,0,0
20,4.0537229987050755753,13.389664758701343317,0.0010677682097068453941,0,0
20,4.090383860981634534,-78.390614550305215857,0.0049977843676891021626,1,0.93782115622881034867
20,4.0878285776059160028,24.20375890825927101,0.0014778743117880633641,1,0.7148641590172811755
20,4.0870483274744557889,-76.61710645662095942,0.0023005419020910083602,1,-0.28565157485829018036
20,4.0858843361390269067,76.067160811073662785,0.001641308681373589021,1,0.88394137455877641596
20,4.0844506525154633536,203.76107933953562679,0.0018896458813413630814,1,0.016559731425255769244
20,4.0835486882303495548,-13.149627516134252403,0.00032921438953172434995,1,1.7999999999999998224
20,4.0830479547843170351,62.540728617821777391,0.00095154550134856079498,1,1.0167730577981313189
20,4.0820009880328411711,-54.424215561048150391,0.0012349621021615058564,1,1.1999999999999999556
20,4.0807868928299839695,45.671407702760333791,0.0025860670787281225987,1,0.40000000000000007772
20,4.0799896968770337224,-4.5073028071905856251,0.0032718278078288989819,1,0.60000000000000008882
20,4.079201723168082161,27.024728350123695009,0.0029788517037780907343,1,-0.83193210955329499612
20,4.0783917796700981384,-7.2850199539649089786,0.0019184362630379338081,1,-1
20,4.0773026714854463393,11.25271251321282584,0.0021206099450936139079,1,1.6816002475825289064
20,4.0749095842895934894,-13.834395573794784795,0.0049198093636063236836,1,-0.60000000000000008882
20,4.073172745423247143,-30.379945871407617375,0.0076503496745341775104,1,-0.13295377234497690599
20,4.0706115213500027039,4.597449454416743464,0.0035361235035142267978,1,-0.8267122034029155131
20,4.0693088448764394016,-6.0675725773098951876,0.0024287074882343392436,1,-0.41061613905246979739
20,4.0564997322159701554,4.5015706413123934837,0.0078819735868991512573,1,-1
20,4.053734684685367462,-13.051562163069130307,0.001104685724594746182,1,0.10888595250596594388
20,4.048445900297996225,14.899069953284149292,0.03471401594570277388,1,-0.49188491815420659625
20,4.0899167943890493149,77.359796365175924393,0.0082278493394323786586,0,0
20,4.0835364795356845491,23.251866252648397904,0.000668342669481861054,0,0
20,4.0820342150211654797,51.718778685287958297,0.0014394002476278756376,0,0
20,4.0782100639069600589,16.242654041061999948,0.0039322564098363006063,0,0
20,4.0742147783446736042,29.765617802333181885,0.0063900223734885980981,0,0
20,4.0429133817409486085,-0.37555378772305603174,0.00061015326268962590851,0,0
20,4.0329067214768228311,0.39758538586381331204,0.0010677682097068453941,0,0
20,4.0918522191055846093,18.554287911089151208,0.0047344123398925909776,1,-0.86494045959716681082
20,4.0904988072246624142,-2.2376677815820622541,0.00120551398579906246,1,1.999999999999999778
20,4.0892398671055598669,28.676354009640505183,0.0049503453465109155396,1,-0.84511827656695248656
20,4.0884225887600091909,-9.8091022352147589913,0.0021936053128592874692,1,-0.06869687630904043607
20,4.0870547703489492619,50.071364790768328135,0.0020595424092484590495,1,-0.43627594209845960149
20,4.0854122819638565289,-40.931397802595355984,0.0017560338555293048945,1,-0.18808686221711429232
20,4.0834556042562004663,-72.552250765583693237,0.0031746086122466893147,1,0.66827555308435981907
20,4.0823872367544629114,8.0817729938353668473,0.00055074227775517975696,1,1.5999999999999998668
20,4.0816127941816047198,14.260209522455971509,0.0011795887360391407381,1,-1
20,4.0809239431208670368,-17.25896786678506345,0.0019125064305676123949,1,0.90646115170903440728
20,4.0799429617035931628,7.5566744953605304858,0.0014711017208917564949,1,0.28808134439730215259
20,4.0792163069805447151,-12.431686231590559188,0.0034892552840806770852,1,-1
20,4.0784259935993123491,1.9720389480015412254,0.00057843641173956658434,1,0.2000000000000000111
20,4.0775013619588209579,-16.103038003923707322,0.0040519349284186233218,1,-0.080518219689451192567
20,4.0755466013187175989,8.7361707145232259109,0.0022769849465988636558,1,1.3999999999999999112
20,4.0740288201885777042,-4.2503903949109425042,0.0022813783862352401098,1,0.95234177986845691688
20,4.0718268708552303181,14.194118741119631011,0.0049277557878791263327,1,-0.1201097317587423996
20,4.0692084406570305788,7.4771648926134854918,0.0033423157870740511158,1,-0.024241204274068065688
20,4.0594173234327532995,1.113608377058401766,0.0025622828053213559697,1,0.37080971318220246058
20,4.0580031363680841849,0.61299504438212903956,0.0021934206439970377334,1,-0.31882082481385021211
20,4.056727032081076878,-1.5064335959180754632,0.0032169503285985781398,1,1.2612985215043805987
20,4.05418239340116493,1.1861724995346978329,0.0017319413325974316632,1,-1
20,4.0536099520421435827,-0.26882263841073156252,0.00046341071044226923295,1,1.999999999999999778
20,4.0520492802116301334,1.0644749663502064418,0.0032759453516541334889,1,1.3714596297067986885
20,4.0447001307091081657,-1.288979615324990613,0.011570875609818479998,1,1.999999999999999778
20,4.0428961903758890983,0.27242313712449822694,0.00066161911955009563516,1,0.26037718992353914294
20,4.0328613189890578639,-0.33338387694995608168,0.0013130296794239527079,1,1.1450736289610969898
20,4.0268879411270237512,0.42662732769026728841,0.04093882458721987555,1,-0.80000000000000004441
20,4.0915810440790654212,-27.83677248645537361,0.0030507663134481293257,0,0
20,4.0838333893852496459,-32.545971401657503463,0.00061015326268962590851,0,0
20,4.0833129162073511509,-31.342689906654378262,0.00045761494701721943138,0,0
20,4.0819757110312639981,-27.854221703846654634,0.0021355364194136907882,0,0
20,4.0799569327962901255,-15.038373256077596452,0.0021355364194136907882,0,0
20,4.0751076204423526406,-16.087690264629252113,0.0038192483106404004692,0,0
20,4.0711137167779201107,-14.088277057842669038,0.0079220497341333968866,0,0
20,4.0591774784441199131,-1.757292847179954709,0.0050565733907282379295,0,0
20,4.0537845373060390486,-1.7648374796907646544,0.002593151366430910057,0,0
21,4.1048122720884947512,-58.217181121125243237,0.0060229828841745786799,0,0
21,4.1028249185679905864,-41.877672738861441815,0.0015253831567240646629,0,0
21,4.1008667025548692919,-65.533580839945528851,0.0024406130507585036341,0,0
21,4.0978965885101024114,-272.34356954757191716,0.0024300987935003694716,0,0
21,4.0950570507342067827,-270.08599290139090954,0.0026791571293738178014,0,0
21,4.0872032777090545608,-92.526056786959557598,0.0040396326622116800545,0,0
21,4.1062732885881851885,4.8262296444307084542,0.003208378421514317385,1,-0.80000000000000004441
21,4.1050245577829507226,-20.633572699946938656,0.0022795322513832279483,1,1.3645921837404055843
21,4.1029134441996983895,54.028836278263277393,0.0022443495587891651964,1,-0.0049513027566082355724
21,4.1015830245988462721,10.794403837166370863,0.0011947776231713614671,1,0.39852648792905243091
21,4.1007164859124687339,38.1349940907978322,0.0020149805539031390503,1,-0.099593334089500273887
21,4.0995181491370704663,-49.554907179889994495,0.0019008430465880592989,1,0.099669146817020895512
21,4.0986745007414304709,58.995598293834710546,0.0019964168046440466942,1,-0.33572894507580625101
21,4.0978289497571918076,-49.833052585150952041,0.0015418654077218277732,1,0.67161738338540710735
21,4.0969030280206579775,166.48138608495750645,0.0028652651114922551845,1,-1
21,4.0958747424452530694,-32.066437482019495064,0.00088201529675084329018,1,1.7612933632066258838
21,4.0949008025786852727,60.62600824627349283,0.0035291459567014390152,1,0.58178877979900034401
21,4.0945055381531476613,-75.104733394671669089,0.0026858107682531072447,1,-0.10647598200205848906
21,4.0933776763311824354,52.932426196943445973,0.0020773183112217956034,1,0.36846992607948336751
21,4.090383860981634534,-109.82362840196965692,0.0049977843676891021626,1,0.93782115622881034867
21,4.0878285776059160028,7.6034821580751295045,0.0014778743117880633641,1,0.7148641590172811755
21,4.0870483274744557889,-15.138334101995731373,0.0023005419020910083602,1,-0.28565157485829018036
21,4.1056470010408956384,26.183882106502480269,0.0031962838875374643792,0,0
21,4.1018599166216143104,3.0188460320106993429,0.0011651973635274704734,0,0
21,4.0994795292094039496,50.240661769544374238,0.001881228701094794396,0,0
21,4.0980337169367135886,68.344068467651169385,0.0019829981037412839316,0,0
21,4.095617922919744025,82.699243817995480299,0.001220306525379251817,0,0
21,4.0899167943890493149,82.339315386183145051,0.0082278493394323786586,0,0
21,4.1062078652766746956,-18.672290294099404662,0.0024866496931311974673,1,0.10690135982707804629
21,4.1048350204356234272,-5.070215429036863064,0.001458981676503680585,1,0.24355529581102075554
21,4.1039140221329057923,8.9824869518028354065,0.0016895513577778495211,1,0.3330912846625797008
21,4.1033096372788993023,-4.9721255248587885589,0.0014205761654229038908,1,-1
21,4.1028220867939610983,1.9465332683363019139,0.00057705698389492641413,1,0.58222626057629056628
21,4.1024399360713434959,-9.176007407016133044,0.0022029694444313531985,1,-0.881854889901809047
21,4.101853719463456116,3.5549203658097479064,0.0013907292097090769804,1,-0.49323850997315665801
21,4.1014820597371599575,-6.6741415218252093666,0.0021861320899679926102,1,-0.86488632871569137706
21,4.1008467467002445161,7.5825877577783646899,0.0013663389411162065942,1,0.29088657180713772821
21,4.09990742387362328,21.576628649349590461,0.0020738369293187854624,1,-0.56982251977434095203
21,4.0984169036713522516,-67.792740906370426046,0.0039904928521026714061,1,0.34880440525112155203
21,4.0979130499529388132,15.350364218903786551,0.0019199398665789254356,1,-0.80747581249014044324
21,4.0967953629639000113,37.011118503101563704,0.0018335937804977238581,1,0.31517465635239855226
21,4.0956650653844519638,-66.248420956838003804,0.0014765135992678324502,1,0.089005307046536225046
21,4.0942995138772868557,51.550039265501908403,0.001675004349290512215,1,1.5999999999999998668
21,4.0930929569488627706,-15.879859061713226254,0.001220306525379251817,1,1.3841442094468801027
21,4.0918522191055846093,63.26680620650745368,0.0047344123398925909776,1,-0.86494045959716681082
21,4.0904988072246624142,-3.3558210680697602157,0.00120551398579906246,1,1.999999999999999778
21,4.0892398671055598669,20.564389604081277696,0.0049503453465109155396,1,-0.84511827656695248656
21,4.0884225887600091909,-4.3684865189023724952,0.0021936053128592874692,1,-0.06869687630904043607
21,4.0870547703489492619,9.9314587267471470255,0.0020595424092484590495,1,-0.43627594209845960149
21,4.103942083373024019,-12.982045977191598141,0.0026221952345461844655,0,0
21,4.1005836658417669227,-27.135725812755559616,0.0036609195761377554511,0,0
21,4.096698401706004411,-88.166861811614836597,0.0027456896821033164799,0,0
21,4.0939937728920741122,-119.2069144080806069,0.0027456896821033164799,0,0
21,4.0915810440790654212,-80.258356161056624956,0.0030507663134481293257,0,0
22,4.1048122720884947512,-136.47999752368971826,0.0060229828841745786799,0,0
22,4.1028249185679905864,-181.40495356144003836,0.0015253831567240646629,0,0
22,4.1008667025548692919,-178.1628397681500644,0.0024406130507585036341,0,0
22,4.0978965885101024114,-49.780105668537089514,0.0024300987935003694716,0,0
22,4.1062732885881851885,7.7590346702470966989,0.003208378421514317385,1,-0.80000000000000004441
22,4.1050245577829507226,-45.358982669188151249,0.0022795322513832279483,1,1.3645921837404055843
22,4.1029134441996983895,230.56664372605416702,0.0022443495587891651964,1,-0.0049513027566082355724
22,4.1015830245988462721,41.326970396620268389,0.0011947776231713614671,1,0.39852648792905243091
22,4.1007164859124687339,94.014475004587708895,0.0020149805539031390503,1,-0.099593334089500273887
22,4.0995181491370704663,-41.793319681316887682,0.0019008430465880592989,1,0.099669146817020895512
22,4.0986745007414304709,21.211201517030026764,0.0019964168046440466942,1,-0.33572894507580625101
22,4.0978289497571918076,-8.6521613944965771736,0.0015418654077218277732,1,0.67161738338540710735
22,4.1056470010408956384,48.595294405767511137,0.0031962838875374643792,0,0
22,4.1018599166216143104,12.531590186339913728,0.0011651973635274704734,0,0
22,4.0994795292094039496,40.721262725531381932,0.001881228701094794396,0,0
22,4.0980337169367135886,13.918290274237264725,0.0019829981037412839316,0,0
22,4.1062078652766746956,-30.438379391077766911,0.0024866496931311974673,1,0.10690135982707804629
22,4.1048350204356234272,-11.80272334867622952,0.001458981676503680585,1,0.24355529581102075554
22,4.1039140221329057923,28.495922297548140989,0.0016895513577778495211,1,0.3330912846625797008
22,4.1033096372788993023,-19.266854954436062997,0.0014205761654229038908,1,-1
22,4.1028220867939610983,8.4355983141329407005,0.00057705698389492641413,1,0.58222626057629056628
22,4.1024399360713434959,-40.9375733974856999,0.0022029694444313531985,1,-0.881854889901809047
22,4.101853719463456116,14.734828099724806449,0.0013907292097090769804,1,-0.49323850997315665801
22,4.1014820597371599575,-24.635988951571810901,0.0021861320899679926102,1,-0.86488632871569137706
22,4.1008467467002445161,20.359406091180630938,0.0013663389411162065942,1,0.29088657180713772821
22,4.09990742387362328,26.918668743835723944,0.0020738369293187854624,1,-0.56982251977434095203
22,4.0984169036713522516,-19.170339194266720284,0.0039904928521026714061,1,0.34880440525112155203
22,4.0979130499529388132,2.8416795745279550545,0.0019199398665789254356,1,-0.80747581249014044324
22,4.103942083373024019,-40.780801147107489157,0.0026221952345461844655,0,0
22,4.1005836658417669227,-60.867591617572060159,0.0036609195761377554511,0,0
23,4.3034029295501863288,-0.63194157001273731922,0.0021355364194136907882,0,0
23,4.1787918302766398071,-1.899253502375207292,0.001220306525379251817,0,0
23,4.1434609690794097503,-3.025018374368073637,0.0016779214723964710858,0,0
23,4.1357389053934410228,-6.5078694283876572513,0.002040797560887838355,0,0
23,4.1338072122200157921,16.402085876505175577,0.0011640540209413394613,0,0
23,4.1316154352844156605,-1.6807084265709517634,0.00061939566613991212628,0,0
23,4.1298349397383837811,38.311452773797491034,0.0016609284282413931851,0,0
23,4.1261535593712412862,-78.171306814631464022,0.0035526082195114039135,0,0
23,4.1234608851021929965,-60.737713917721002588,0.0020387856068074506309,0,0
23,4.1218327548636137792,5.0568040630934616431,0.00022926216121128275508,0,0
23,4.1204255952344928104,-117.28202659536951558,0.0014774053565783475724,0,0
23,4.1189499177156223553,-264.46618577211495449,0.0016670927301697165829,0,0
23,4.1171991794520277352,47.625880555806453742,0.00059286365439450863877,0,0
23,4.1148306041393052368,-457.89294262621939424,0.0023524957191519272649,0,0
23,4.1113340043689587944,141.51766326045370192,0.0016894345831390674903,0,0
23,4.1048122720884947512,-150.72608460224790861,0.0060229828841745786799,0,0
23,4.1028249185679905864,-47.253885885290003444,0.0015253831567240646629,0,0
23,4.0537229987050755753,14.997949025208912488,0.0010677682097068453941,0,0
23,4.3035046783523496217,0.24976483828612452975,0.001557434378989859796,1,0.50525606622209895402
23,4.2051264640573462472,-0.43810790664170429221,0.00048430290314141119772,1,-1
23,4.1919427996181841678,-0.49313324318827522763,0.016390563687855397995,1,-0.98617540841470163748
23,4.1788926848165681704,1.1480685336355380688,0.0011456219834944159942,1,0.73492815708941505726
23,4.1772907203800162534,-0.41662466350370574997,0.00083584452212869734915,1,0.17236602714076193488
[truncated: 6,642,126 more chars]
