# Supplementary material for: Improving the accuracy of model-based quantitative nuclear magnetic resonance
Source: Magn Reson (Gott). 2020 Jul 2;1(2):141–53. doi: 10.5194/mr-1-141-2020 (PMC10500698; doi:10.5194/mr-1-141-2020)
Supplement: The supplement related to this article is available online at: https://doi.org/10.5194/mr-1-141-2020-supplement. [file mr-1-141-supplement.zip › Thiamine.jdx]

##TITLE=	1D
Thiamine in D2O 
##JCAMP-DX=	6.0	$$ MestReNova 14.0.1-23559
##DATA TYPE=	LINK
##BLOCK_ID=	1
##BLOCKS=	1    
##ORIGIN=	Mestrelab Research S.L.
##OWNER=	yma80
##$MNOVA/LINK_BLOCK_TYPE=	ITEM	$$ NMR Spectrum
##$MNOVA/ITEM/POLYGON=	(XY..XY)
5321,5835
8722,5835
8722,8208
5321,8208
5321,5835
##$MNOVA/ITEM/Z=	0
##$MNOVA/ITEM/ANGLE=	0
##TITLE=	1D
##JCAMP-DX=	6.0	$$ MestReNova 14.0.1-23559
##BLOCK_ID=	2
##DATA TYPE=	NMR SPECTRUM
##DATA CLASS=	XYDATA
##NUMDIM=	1
##ORIGIN=	
##OWNER=	yma80
##.OBSERVE FREQUENCY=	43.273374319824199574
##.OBSERVE NUCLEUS=	^1H
##.SOLVENT NAME=	
##.PULSE SEQUENCE=	1D
##LONGDATE=	2019/03/27 10:38:55.000
##.ACQUISITIONMODE=	SIMULTANEOUS
##$ORIGINAL FORMAT=	Magritek Prospa
##$MNOVA/SCALES_VERSION=	7
##$PARAMETER FILE=	(acqu.par, ASCII, c:/Users/yma80/Experiments/Sample_20__Thiamine/fid%20-%20Thiamine_SpW/acqu.par, 0)
$$ Solvent                   = ""
$$ Sample                    = ""
$$ startTime                 = Tue Jun 25 10:44:38 2019
$$ acqDelay                  = 0.0000000000000000
$$ b1Freq                    = 43.2733743198241996
$$ bandwidth                 = 2.5000000000000000
$$ dwellTime                 = 0.4000000000000000
$$ experiment                = "1D"
$$ expName                   = "1D"
$$ nrPnts                    = 16384
$$ nrScans                   = 1
$$ repTime                   = 0
$$ rxChannel                 = "1H"
$$ rxGain                    = 0
$$ lowestFrequency           = -1045.6814635669497875
$$ totalAcquisitionTime      = 42
$$ graphTitle                = "1D-1H-"StandardScan""
$$ userData                  = ""
$$ 90Amplitude               = 0
$$ pulseLength               = 0
$$ Protocol                  = "1D PROTON"
$$ Options                   = "Scan(StandardScan)"
$$ Spectrometer              = "Python"
$$ Software                  = "Python"
##$PARAMETER FILE=	(datafile, ASCII, c:/Users/yma80/Experiments/Sample_20__Thiamine/fid%20-%20Thiamine_SpW/data.1d, 0)
$$ 
##$PARAMETER FILE=	(integration, ASCII, , 0)
$$ 
##XUNITS=	HZ
##YUNITS=	ARBITRARY UNITS
##FIRSTX=	1454.3185364330499851
##LASTX=	-1045.6433165942937649
##DELTAX=	-0.03814697265625
##XFACTOR=	1
##YFACTOR=	5.9667969753940842004e-05
##FIRSTY=	-0.0036099199205636978149
##MINY=	-0.030126227065920829773
##MAXY=	9.1335382461547851562
##NPOINTS=	65536
##XYDATA=	(X++(Y..Y))
1454f0K2K1l4l5J05J06q2q0l3l2Q0P8opppM7M7j29j29n3J35J47L7q9q8J6J7O3O5m8m8p2p3
1453a26M0J51J21o6k03r1J27J27n3n2l7l6P6P5k9k9k9k9L2L1L2L2q3q4J03J04L4L3j54j53
1452a36N0N0M9N0p4p4L8L8M1M2p0o9l1l0Q2Q1J1J1J0J1n2n1N9O0j85j85J05K92J51j12j35
1451B7k2J4r8m2P0L5p7o8J19J77j0j43l1Q7Q9r2r1k2k2L4L4P7P8l5l5rrrrL1L1q1q1m3m4O3
1449a07O2J25J3j10j11J52J53o2k49p2J91J90p2k31m4R6R6K1K2Q4k8p4p3L1L1p3p4J06J05
1448I8n6j68J1J23j1j24n9J29J66k1q6K6O1n1J2J2K6q6r2K0N9n3n3N9J52M0q3q3rj21o3J25
1447a00K63P7j44j42N4N6j24j25J40K52l2k17q8J01R9q7l7J50J46m2j64n0J24J2j60j62K3
1446a77J36pj20m9J38J52M0LKk2k2p7p8rqR7R6N6n7j68n6J5J5K2K2Q6Q8k9j41p0M3Q5Q5o6
1445B5o5j6R5K9L0k0k0o7o7K6K6O8O9r9r8j1j0M6M6L1L2k5k4L6L7n8n6R2R3j02j01m9J38J38
1443A69m9j43j44N1J62O2j24j25O3J42L0o3o2O6O8j02j01J06J07o2o1J6J6J7J7q4q5M7M6l4
1442e4l5j5R7R1r4j52L7J80O9j37j37J84J85j27j26K1J32J9j68j27O0P5P3J6J6J6J5n8n8n9
1441f1n9O4O3k8l0mmnmP8P8q9q9P8P8j6j5L2L1o2j73k7J61J08p9q3J02N7n6j10JR9J00J%r3
1440D4r2K7K7k8k9n9n9L5L4L1L0j9j8PJ18J13p5j30j8L9L7O2O2l2j44q2J06J91Nj16j15M1
1438gM0l1l1l1l1%jN6N4j2j2O2n0r4R0K17K8k55k56N1K37Q9k4onp3p2K1K1K3K1K2K2J2J2m4
1437D3m4r6r6J11J09qqpprrrrK3K1K3K3j10j11J33J32m7m7J0RJ6J5J6J5j19j21J1J1KLN9J70
1436I8J00q9j02J1J04rj07j06M8M9J03J05q9q9q8q9R6R6KLooo1o2N6N5O2n0p2p4Q2Q0K7q5
1434gj79o7J13J14Q9k2k8k6N9N9p2p1K2K1L9L8m8m8j18oJ29J29m0j52p5J12K07K0j06j04j9
1433c7j9L7L7kkk9l0M1M1q9q9J25J24K7q5p5L7K3K3MNJ8r3j52l9J27J26l7j48o8J20K00Q8
1432B09j10j10n4N9mml7l7J9J9jjQ5Q6j3j25o9M3J26J28J09p9j95j94M2J53Lj09n3N9P5l6
1431a6K6K6k4j35o0J29J23o4j52L5J21Ro0J26J60k8k54j42J10J10j26j26J17J16j5j3M5M5
1430H3m8m8J9K0K0J9L5L4r7r6QQk0k0M9M8qpN1N2p7j88n3J73J43q1m2P0P7j47j29R5K19oj82
1428b6p1J32J33k4k3n2n1j19j20Q7Q6M4M3j3j2j29j29J11K24J40q5j46l3o9p0L2L2O7O7N4
1427H0N4K8j96q0J44K43J7k61j48R9R9k5k4k2k1n0m9P6P5K0K0l7l7n7N3J44q0j78o7Q8Q8p3
1426g7p4J33J31p3p3M0M2j5j5K3K3j07j09O1O1MML3L5k2k2O2O2r4r4m2J45J06j56j77J1J99
1425B5K00j4j27j05PK8q2j32k0J66J65L7p6o8M5KLk0k0j8k0K2K1l3l4Q6Q7j49j49M6J58M3
1424G4j42p1J17J16p0o8J18R1r7j58K9J43L1n4n4L3L3p3p5j9j8k4k3O3O4Q6k5n5n6J07J07
1422A30J4J4n9n8j42l1J35K49Jk61j99O4J80oj41l0J02J00J4J4K9q5j31k1P8P7l6l5rqP7P8
1421A04k1j32o0N3J01j1k6k4L6p4j3R9R1r7k26l9K30K29o1j72j2J00Rj03o8M4O3O4k3k2J4
1420E3J4p9p9M8M8M8M9j12j14N6N5J3J2J3J3L3L2j35j36P9P9j5j5p1p1R7R7P0P0J4J5j03j01
1419b3rrONL3L4j32j34J11J10M4M4m9m9O2O3l1l0n7n9L6L4KJL0L0j1j0l9l7n2n2M1M2N8N8
1417F1L1L1p5p3q4J41J04j20j99K4J70J70r7r6l5l5N9N8K1K1j09j09J00J00l0l0R3R4j13j11
1416c8j9j9L7L7N3N3p7p7Q5Q6j21j20M8M9m6m6J07J06j21j23MK28J09j15j70J7J29J7k9k8
1415A6k8k8J6J28J22o5j56m2M9N1q3q4j6R6J05J06r3r3J8J8j05j06j9R5J00j0j37k4J00R9
1414C0J18p0k00k00J04K18O4j22j19O9P8l5l8P4P3l8q1L1L1q2n0O2O3n1k2R1R0k2p9L1L8p4
1413a8j05Q3J34K2r0K2K6q4j39M9J68N6j53j54M5M5K7K7J21J21m0l9m0l9L2L2L2L2l5l5K8
1411A31q4j10j11J18J17M5o8mnj8j6O8O9Rj04n4N7M7o5o4M6J24J2j25j23O3O2O3O3jjr5r4
1410d8Q7Q7p8j90n2J73J01j0J0J0r0r0N3N2l7j50q7J37J23J1L3L2k9j40j07J18J73n1j11%
1409g0%j12n5J70K25Jk07r5P1P1n1n0M2M3M7M7N7j67k01K4J60M8j20qJ60M8j03RK75J63j85
1408B37k97k5J98J01j24j77o6M6M6mmQ7Q8J44J44k02k01r9J25J21j03j94q3J71J70jk24j15
1407b41J09J65n8j81M5K09R9j20j19J16J17q8q7l2l2QQO4O4o2o3ppn8n8J11J09o9p0K4K4N5
1406b5N5N5N6r2r1M0L8L6L6k0k0o8o8J00J00j00r8O6J78Q3j42p8L4o3j75j08J17J35K2o8o9
1404a34J24J22m6m5j02j02J41J40l8l9l7l8L2L2k3k4J4J3J3J4q1q1J2J3J9K0l7l7P4P4P3P4
1403A40j2j2j34j36J27K38P4j52j17J09N2j73j11J12J69n6k84n9J93J93m4m5m4m4l6l6R4R5
1402A01p5p4R4R4j12j12N7N6K8K9Q5Q4o6o6o7o5q8q7Q1Q1RRPRO7O6k7k7j25j27Q0P9l5l5J18
1401D6J20Mk19j01J1j1j2Q9Q8p0p0j5j4M3M4J22J22N9j67j72N1O7m3n1J72J82m3k34j1J20
1400A07J21j46j45K7K7J20J21q2q1j37j38R9R9NNp6p7J7J7Q7Q6q0q2Q5Q5m4j55n6J70J19j04
1398fj70N5J20J20l2l2l2l1l2l1l2l1J21J20Q5j39j13kJ4J4qqM8M8j1j1j2j1r5r7J85J83n8
1397A19n8kkp5p6N6N4K9K9L0K9p6p4J8J8n5n6L7L8M4M4q5q7m4m5Q7Q7L2L2L3L3n1n2n0n2Q4
1396gQ2L4L4o5M8J19j07k87j76J59J59r2r2R6R5L1L3K5K5j06k17l2J92R0j33j33R1J22j03
1395a15j38k5PPO1K86K38J3j83j83O4O5m7m8l0l0J48J50p4j86j45Q1P3l9q1L1N2N0n3n5q9
1394a95q8L3K57J26r8j95K8P5P4k3k4K4K2n3N7J98k8k19j07J72J74j6k40j49P5J11kj10j10
1392b31O9J80J40q4j25j4P2P2l2l3k3k4J0J23P9j46k51k7K10K08j86k99k2K04R7j27k2K01
1391A9J46p9j57O8J08lp3L9J09j15k18OJ28J27j00r9J48J48K8j97p7L5L6L8o7o8m1m1J46J45
1390A39j2j2j3j2RQj03j03Q1Q0l1l1k8k8k9k9l9m0J48J47m8m9O4O3opopj18j19O6J77J02j23
1389I1k28mJ14J12o0n9k1k1R0R1j35j36N1N1K4K3K2K3nnnno6o7l1Q1J43p9j23j0J11J11OO
1388I0k3k2k2k2j3j4pqM6J59J10j15j70j72P4J86P5j51j42Q1O4O4l3l4p9q1L2L2M0L9L9M0
1386F3m5m4m4m5Q2Q2l0k9j4j3j4j4lmlmN1N0m2m2J3J4M0M2r9r9J37J36r5k07lK20J54p1j31
1385a1k0P2m0q1J41J68n7k59j49R9J00J2J3qppqN4N6p5p6O6O6L8L8p8p8J5J5J21J21q4q5l7
1384C5l6o6o5l9l9N5N5m5m4J24J23lkn8n9q2q1J62J61j9j8kJ10K6j99j06J18N2n9j24J02J10
1383H7j12j63O2L07J96j56k67j05J19N5n5l0Q3K6q4p1M1O5O4j4j5J16J17k8k8q5q4N3N4j15
1381C3j14l6l6K0J9jjn8n7J60J58rrk3k2k3k2L5L6QQo3o2O7O8j39j40R6R7Qj05o1J27J36K5
1380A20o9o9k8k8k8k8P8P8j5j4m1m2Q8Q9L0L0o5o4J00J00o9o9r6r7L4L4R6R7Qj78j72J5K04
1379B9R3j04j04Q7Q8k6j38n7J31J51M0r1r1m4m4j6j7l8l8J93J94Pj81j31N5P2l8j21rO6O5
1378a7P2P2l0l0jkk6k5L0L1O6O7j40j39P4P5J8J8k5k5k5k5n6n8ONO6J77R6r2j88p6k0j9K8
1376a18K8J21J22j53j54J08J08o3o4M9M7l5l6l6l5N4N4N3N5n5n3JKK5K7q5q7m2m3P0O9RRJ20
1375G2J21j82j82J5K38P1j53m2J82J09j15j50l8l6l6Q1J93N6j69j75M9J58o6k38j4J62J61
1374G2q3j96l8J86J72O0j23j23N7N5n8n9M6M5J7r5o1J63J31r4q6J37J42L0j56j54J0J0J1J1
1373B9r2r3R4R4k5k4K3K4Nj07j22J03J09ll7l7J8J7J1J1Oj06p1J54J92l2j42k9kkONP9Q1l3
1372A04l2J7J7r5r4J1J2j01j00Q0P9P3P2j8j29o7J21J61M9o3o3MMn2n2k5k6J2J24J05q2j87
1370a41%J31J30m5m5J4J4r8r9J78J78j58j58rrM8M7J9J8l6l7J21J21J0Ro7o7j22j23R5R5L9
1369E3M0l7l7j48j50R1R0L3L4J8J6l8l8J13J14k10k11K4K11N6n4J2J3NNkkjjl5l5l6l5J31
1368a1J30n6n7L7L7L7L7j02j02m6m6N1N2o1o1J09J08p8p8J27J29j28j26K4J36P3j14o3M8L0
1367C6L1j9j9j9j8R8R9j70j70N2K37Q2j06o8J20O4j24j47M0Q6k5r2J9ONJ2J2O9O9j2j2o9o7
1365@l2l2K4K5j3j2j2j2J2J3m4m4Q2Q0j2j23m3J44J35j27j75J1K33J22k8k7l4l5j02j02K8
1364a00K9J20J21L2j55j75J1J26J4j23j23J14J12j0j1j2j1qqQ5Q6p0o9O0O1J04J05k40k40
1363a75m6J40J47m0o1N0J02j0j40k8J02rj37k6J11J09j02j03K8K9nmN1N1l6l6R4R5r9r8mn
1362e5lklkK1K1K1K0o7o7j1j1J1J1O7O7p3p4K0K0Q6Q4q2q3kjR1R2o7o5o6o6J09J08j20j20
1360a91J1K36J57o8k39j6J99K00o3o2poj73j74M2K66K0k03k46k2K07K05k3k3l8l9N3N4n6n5
1359e4J11J12j84j85j7K09K18j55k24jK26K27llj05j05K7K6J7J7p6p7L4L5o0n8mnmmR3R4%
1358A22Jq7q5q6q7J17J16O1O1j7j6j7j6q6q6M5M5rrrrR9J00j07j05K7K7k9k9L2L1L1L2n3n1
1357d6J08J09J8r5j00J0jj12j07PJ44J44J25o1k02k02m5J42R5j8n9J27J59k8j12%R3j9p8q0
1356h4L4L4k2k2K7K7m3O9J26J5k22j10J92J93q1j93j1J76R7j66j41J18J62k5j68n6PQj09N
1354a63J40J39q5j96j08P9J42J40K2K2l8l8l8l7OON4N5mj16o8M5R0k1j06NP5P6j0j1m1l9j05
1353a28RJ29J30l6j48j2R9L0L0j5j4j01j01rJ04J03rp0p1J16J16Nj82j76Q7K37J27j50j49
1352d9Q9R0m6j57K4J36J7j69j2K11J68k07k43k0J50J48o9o9j3j3PPPPm3m3Q9Q7l8l8l7l8Q8
1351B1R0p3p1QJ20J05j20j52P2J64N1j29j28P0P0nmj35j36n8n8J48J47j9k0J11J11j04j03
1350b7K5J36Q1j44j29j7L2L2j8j7R7R7p1p1opopq7q7J57J55r5r4mJ08N3j71q5J39J74n0j78
1348h5o6J80J81M1j84j07MK1K0NNNNq6q7l1l2P1P0J25J27j46j44K3K4N6N6%%n1n0P2P3r1k02
1347a98o7J58J72O1o8o8n8n8N5N4L4L4p6p8lkJ09J10j36j37k5k4M9N0R8R8oj17n5J32J24J1
1346A73j01j00M3M4M4M5n7n7M9M8l4j46j40M8J99Q7k4k5N6N6j32j30j6j6j6j6J54J55j02k15
1345a26l6K26K26l6j61m8N6n8j21rJ07J08j37j38M9M9Q1Q1l1l1N1N1o1j73j18P0J40K8j26
1344h7j5J02J03p4p3p4p4J21J21O5O5q1q2L1L1o2o2M9M9nnN0N1k3k2k3k3j40j41J17K29N9
1342A77k03j62K5R5j7n5n6J07J05N1N0m4m5J2J2q3q4Q9Q8K6j99l5J88K27j48l11q7J68J68
1341E9nml9l8J8J6N4N3j19j20q8J38J86P4qqM1M1j83j81P9P9rrrrm8m9O4O3l0k9P5P6p2j83
1340a24p4J51M9j73o2J62J30r4k01K5J85P1j07MN9n2j73N3K32J22o2j74j02J22J63N2j24j23
1339f5p7J47J39K6rrr1r0r1r1Q2Q2l0l0O4O3N1N0Q6j39j93L0J78J80j44j43l0l0l0l0Q7Q5
1338B8q5q6K3K48P5j50k61l7Q5Q5L8L7L8L8j3j4j3j4R0Q9p9p9j13j15J7J7J43J42o3o3j9k0
1336c1P3P4m9m9m8m9J02J04J0J0J1J2q3q2j7j8L7L9j4j3M3M3j2j2j05j06OPJ00R9j05j06O2
1335f7O3M6M7q4q3KKKKk1k2L5J46N7j30j30N7K24J12r9k11p9L3N6N6kkn8n8Q0P9n1n1l1l1
1334a11l2l1J31J30%jp5p4j9j9llllP0P0k3k2L5L7R2R2j56j55o2o2Q6Q5K9K9Q8Q8q0q1j03
1333e6j03J33J32o8j80n5J33Q5Q6p1p0O3O3O4O3o1o2j17j18J2J2J2J2J5J5J5J5J6J5j09j09
1331b18L0J44J49p4j02j02J27J26N5N5l8l8o0n8L3L4%jn7n6N1N0p9q0P0O9J3J4M9M8j20j19
1330h5J2J2L3p9pK17J31r3k83n9J94J94j20j19N0M8O0O0l4l3j38j39J73J71j4j26l4J88N4
1329B34j71k19NJ68N6j70j70M2K67J73n1j49j48Q0Q0L8L9j8j8n2n0P8Q0r4r2lJ09J29r7r4
1328a8r4J3J4J06J07M3M2q8q8q2q2k6k7O8O7O6O7j06j08N9J71K0k03j55O9J68n6j13J12K02
1327A48k3j88p6R0R0j09j09O6O5k9k8KKN8N7J05J06k00j99m8J77J75m8j88j89J15J16L5L4
1326GL4L5OPj%m6j56j04J21L04P9j73j73L1K9Q7Q6J0J1m7m6P0P0r9r9k7k6k7k7k4k3P0O9j04
1324g6j06kK22J45p9j09KJ22j02j95L0K18J06r7r7R1R2l9l9N1N1j18j17K3K3K2K2n1n2n2n2
1323a63O8O9J2J3L4L6L6L6j71j71o8J57K12j3p9p7M3M2j2j2L1L1r8j00Q4Q2j0j0Q6Q6j21j19
1322f6J16J17q9q8QPQRL6L6n7n7RJ0m7m7J05J05r8k09l0J95L7p4jJ11N1j73m3J80J74n1j28
1321E6j5L8L8m6m5m5m6L0L0N1o1l8J85J36q8k37j3J22J0r7J5J08mj41l0J43J43j09j08K1K2
1319B5lln9n9K8K7Q3Q3j90j92R0Q9O8O6O0O0j13k25o0J66J79m4j35k3N0N0JJLKLKj6j5L9M0
1318G8J%r2r4J4J4J4J4p6p6Q1Q1R7q8j52L5K10R8q9q8O3O4m9m8M0M1Kj08j7J71J64k4j81j81
1317h1ooO0N8LMm4m5O7O7j0j0j0j0o8o9o8o9O0O0O0O0k7k8k7k8kln8n9J59J57M6M6o2o2o1
1315fo2l6l7P7P5O9O9m4m3O7O8j83j82j7J70J13p3n7n9M3M2O3O4m9m9q0q0J07J06p0o8j4j3
1314h9q7q7j2J76J96Q4L5L5L8j50k19j08J17J16J2J2J16J16j47j46j2j4M2M3p0p2j6j5P4P4
1313D2l8l7j1j1j1j0Q6Q8r3r2O0J71J09p9j77o6M6M6Q9Q9k4k4p4p4o1o2q5J03J16Nq1q2K3
1312a19K3n0n1J37J36l7l6%J14O9j17j24j2P0P1l4l5J7J7l9l8Q5Q6j02j00llN3N2JJKJm4m4
1310e3O7O8nnnnm9m9O2O3Q4Q5j78j77L5L5L4L5k5k4j30j30O9J81J17o9j04PJ07mn9o1M5M4
1309Fl6l7O7O8l4j46q4J03J61M9o4o2n9n8lkQ6Q6L1L0n4n2KKJ3J3m2m3P7P7K2K1q3q2K9K9
1308C1Q2Q2j05j04K9L0L1L0K3K4j64j64J72J70M2j82j11%p7p7J05J05jjL8J50J09j17p4L8
1307A14Q0l2j22j22j7j7P6P5K9j95r7J27K25Jj40j42J07J06RJ0m7m5p4p3J07J06n9j73j31
1305c14R5J21Rk7k6Q3Q1k9l0K7K6k8k9P8Q0l3l3o1o3M9M9l2l2l3l3P5P4l5j46j41Q4J34K1
1304c9n4N8J00J01j38j36k5k4P3P4J7J7r6r8m1m1R1R1R0R1ppo4o3l2l3Q0P9r1r2R5R4m9m9
1303b8n0m9M6M7o6o6R0R0k1k2L5L7jj13j25O2J36J36o3o3o3o3K0K1P6P7q2q3K9K9K2K1K2K1
1302E9QQQQo0o0N2N2%jn6n6O9P1m3m2K0K0K0K0j54j55J08J07n6n6N6N5noono3o2QJ95J72j6
1300B14j62j60N0N0o3o3N4N4N2N4J1J2J1J2J8J8r5r3rrM6M7l4l4P7P8j16j14m1J46J54M2p1
1299A36p1k7k6k6k6M0M1M1M1n0n1m9n1N5N3n7n8J16J17p1p1n3n4L9M0ooP9Q1o2j73j51P4K28
1298D2J17j18j17N0J63P2j53j58O6O5j58r6J30K83N9j11j11Q1Q1p0p1j4j5M3M3M3M3r5r4P2
1296G2P4j27j26J16J16r8r8m3m2K3K3J16J17ONq8q7j3j4Q0Q1K3K3Q0Q0k21k19R9R7n8n8nJ07
1295D1L2j93j06J18J32r2r2J32J59o6j93q2NNm5m4J40J39j04j04J16J15J17J16o6o5j58j59
1294b02J03J03M7M7n8n8kkQRO3O5j02j01O7O5k8k7K0K1m8j61n7J69N9N7J7J6KLr2r0P5P4j9
1293D3j9k2k2k2k2K3K3l3l3M4M3q6q7L6L5L5L6l9l8N5N5O6O7j39j40N5N4jkL7L7n5n6J3J3
1291d6J2J3K6K6J21J20j20j19o3o4OOO2O1J11J12j33j31l3l4O1N9mlo0o0M0L9M0M0j07j09
1290a31J57J58k0k44j38K37J99k7k57j45P4P4P3P4J5r7j66N7J57M6q4q2N5N4j13j14M2M2M2
1289f2M2R5R6p0j82n0J74J75n0j66n2P4P6o6o4rro8o9Q6Q6J63o1j84p3J13J13QQj3j4j3j4
1288B0Q5Q5j03j01oonol8l7P5P4jkn7n8k1k2J4J25J39q6k02r1J69J67j2j2j2j1o6o8J06J07
1287A43j54j56M2M2o3o3L8J51J08j15q3K9RQP1P1m1m0MNO1O1l0k9j34j34O5J78O8j56j14J10
1285d8J59o5n3N7O6j58j99K6J47J47l5l6l4l5l3l4J54J54p6p7L6L6m4m4O9O9j06j05%jpj20
1284a90q5J40K15rn7n5Q9Q9r9r7o6o7M6M6N0N0o1o2J25J27o1o1mln9o0R2R1k0k1J5J5P1P0
1283A94J1J1j02j01m1m2m2m2k2k3R0R0K3K5p6p6k6J61J61k6j91j92N8N9J05J05qpo8o7M5M3
1282B9l1l3P9Q0j0j0o7o5M0M1M2M1p6p5L6L6klm7m6n0J36K07R5j54j55K7K6o1n9o1o0l9l8
1280b27J48J48RQQQj09j11P7P6o1o1J25J26q1q1K4K5m1j53N0K37J35j28j51l8N1n9o0N3J32
1279G9K0k2k3jjjjj03j05l5J54J62k4j98j3K30K30q6l09j32R3K10j5j51j52P8P7M1M1j5j5
1278A3j3j3j3j3k9k8K8K7N8N8KKq9q9MNJ1J1m5m5J28J27p8p7K2K2l5l4N2N1m1m1N6N5Kj09
1277e8j17J08J68N6j06j05J8J8QPm8m9L6L5L5L6J07J07n9j72j44Q1J09kr9J2J73O2j81j79
1275a43N7N6M0M2M1M1k9l0K7K7o1o1P0P1j70j70l0J95R7j26m9O3l2l1L2L2N4N4kkm5m5QJ20
1274A01P2j53r0K3R3j9M5M5j9j30j45Q0Q5k6p6L6J27J6q2K9J08p9j98q6J48J48j56j56Q8K00
1273B9Q1j07j42l2J63J63L7j51k06j9J19J18p5p5P7P6n4n3J02J03n9n9K9J41j1j98r8Q9J40
1272A28m6j25j3M3M2J1J1J1J2j07j09m0P2P4P2n0n1K0K0o7o7N1J61J19p0j40k9j0j0n0m9Q1
1271a05Q1J1J1m6m6J3J3O8P0q2q4j5R8Q8Q9l5l5l8l8l6l8mmN3N1j2j2r7r9j5R7J03qo7M5J05
1269H0J06q5q5J14J14m9j62p4L8P2l8k5k4M5M6M6M6J9J9p5p5n7n8lkL4L4L4L4j58j59Q1K66
1268I9J10p8j55m2K3K3Q6Q7JJr3r2K4K3K4K4p0p1j27j27J84J83k2k2m6m5J0J1K6K5Q2Q2j40
1267bj40O5O6K5K6j05j05N4N4kkk4k3J07J07r9r7nnO4O3J20J20j60j59k9Q4N1j34j29N9J28
1266b7J27o6o5NNR8R9j46j45J8K04P5j13o6M6K5q6j22O5J30J32j01r9p2p1O0O0M5M6j21j23
1264a83NMJ28J28l7j49o7J20R0k2o5J21K17qj13j14P8P8K1K2kkk32k31k5K00J49p5j88p7J27
1263a02J26j3j3j3j4kkjkK7K7o6o6N3N2N2N2l5l5K1K1q3q4Q5Q3O7O6k8k8m1m1r6r8J49J50
1262A68j9j9k8k9k8k8m5m6J53J53j10k21j17J08Q5Q5R3R3l6j49n7J68J15j10j38j37L2L2k5
1261e7k4j2j3J86J87k9j41q7J38J41q5j50j49QQJ01J02L4L5j59j57r9J26J93Q1j81j81Q6Q6
1260a2r2k05O5K89J56k18j72K02K73j03l19r5K11R8j78j80J35J36P8Q0mmr7r7jkjkN7N6JJ
1258E6rrrrk2k3O9P1k3k2k3k2m3m4m3m4Q1Q1J8J8J6r6j46M1J39K6o6o7J54J54n2n1o7o6R4
1257F2R5m4j55j16P2J26n8j75o2J68J66l1l2j02j03K7K8J37J38l1l0M2M3n1n1J32J32j12j12
1256A03p7p6k1k1L4L4J27J28j5j5j5j5j70j68K7K14J14j49j05Q0R6r1j46M0J55l1j19qJ23
1255C3o3j96pJ87P4n6n6L5L5k1k1M9M9q1q1Q4Q4j58j59J93J91q9q7L7L7q6q6N3J65O8j57j05
1254a35QK4K4K2K1K1K0N6N5jjp2p0j6j5J05J07j38j36J5J6m1m1L9L9n5n5J41J41O8j55p4L8
1252d5N4N4qqM8M8jjn7n7%%n5n6NNMNN1M9k6Q5J38q8k49k4K03K04k11l22J6K41J85l9j22j0
1251A6l0l0L0K9q5q7KK26J03j22j72o2J06J04L1L1o4o2POOOO1O1j43j44llJ52J51J58o8j84
1250B7j84J21J21j0j0onnok1k2L5L4j8j7q7K4J93Q0j95l08m0K98K47j4j53j53l9l8Q6Q5O2
1249H2n0q6K5M8M8ooQ1Q1K5q8k23k24L6J49O7m5q3J05J78O7o6j78j00J3R5j7j04QJ51J50q0
1247E3p8j6R6k3k3M1M1j6j5L7L8k4j35m7O6O4m6k6Q4L0q3p2L9R5j7j51m0J26J25J9r4qJ06
1246A46L5p8j63n2P7P6rj0K6K6o9o7R5R6r9r8P3K63P2j91k27m2Q1P9m5m6J0J0K0J9p3p4O6
1245g3O7k0k0jJ11Kj85j05J57J10p6j75o2J07J06O9P0R4r4j15O9J86P3j10j09N2N2j70j68
1244a58M1J53M2p0j2R7N2o0KLM6o6p3L8J3r9j00J2R5j8p4L9J21J0q7q8R1R0j40j40NJ93J50
1242A08L9J0J1j54j53l2J54J54l3j02j02J8J7m6m7M8M7P8P9P2P2q1j92j48L9J92Q0j56j56
1241a84M3J55Qj79r7J65J73j3j07NO0n1j24O3K19J08j26j24M0J53k3j36rJ03K5j61j63K6J45
1240fL3k3k2O5O5k8k8K8K8k8k8O5O4k9l0q7q7r5J7J33J33Mj08r7J3L8L6MMq1q2m5O8O0O0k4
1239a0k5K5K3Q3l0j34j35P6P6j8j30lJ85J41L1kJ11N9j28k06r4j%m2m1J4J5P6P5J9J9r6r8
1238a65l6P6J79O8j31j31qJ80J80pj80j78j8R5J47L7j30j30j0J02O1j25j43M4R6R5j9j9P4
1236DP4l2l3l8P2M9M9p4p4L5L6k4j37o2N1J36K4p5p6M7M8j2j1p6L8Q0Q1j09j11NJ16J18No8
1235E6o7o8o8M9J60M7j40j15P2J91Mj70j72P2J84K6K6k4k3N6N6%%l1l1q8q7kkkkk6k5O8O8
1234hK6K6k9k8m2m2J4J4O4O4l0k9j0j1j1j1P9P9q2q2M9J60L2j92r7J28L4j89j82M4K11R6m5
1233@m4P8P9J8J8l8l8l9l9l9l9o2o1J08J06l0l2K4K4L8L8j52j54O9K93J48k26k30nJ88P6p7
1231@p8M6M5r4r5J49J48n4n4n3n4%%R4R2p6p5N5N4R6R7p2p2r6r4J09J11o3o2noP5P5n5n5j2
1230B1j1M5M5l3l3J37J36j78j76N8N9l2j44n3J71K53K8j12j13o4o4o4o5J21J20j1j0J6J7P2
1229A36P3j77j76m6m5K2K2J16J15n5n6P5P5j1j0j0j1l9m0N3N3J5J5p9p8J9J8P4P5j56j57Q4
1228a06J96L6j88k8J96P6j50n4J68R8j28k50k7R2k0q4J41J35r0j75M9K17J07r8r8J18J18j26
1227A25j25N1N2m2m2lmQ9R0o7o7j22j24O7O6J0J1J1J1J2J0L5L5k1k2m2m4j00j00L3L3R0Q9
1225eJ7J8J8J8r8r9nnJ62J62q1q1jkr4r5NOO2O1k0k1P3P2q9r0MLP5P3O8O7n8j69j48P8J39
1224B0K7o4o4K6K5K6K5J8J8l9l7L9M0n4n3K2K2p2p1K1K2J15J16p8p7J4J25M8j76j07NJ22J22
1223A26jkKKKKo0o0o0o0L5L4L5L4l0l0O2O4q2q1k6k6K8K7K8K8O1O3o8o8L7L9L1L1m3j54o4
1221a44J60K73M7k05k05J42J42o4o3l9l8l7l9O3O1l1l0KLKJ%J%%J9J8P5P5k5k6k6k5N4N5p6
1220A20p6J8J9j50j50J29J28kkJ00J01o8o7J6J6j15j14K35K37j93l04N7K81R2k83j97K6J46
1219@L3JJJ5r7o2J62P5j48j91L3J36J35n9n8L3L4k7k7k8k8kkkkP1P0o0n9J3J4J3J3L1L2L2
1217I5L1m2m2m2m2n4n5L7J48J25j00j72j73J48J48N4N5p1o9p1p1Q7Q5ppM2M3q0q1J6J27L8
1216A00j87j18J08J90Q0j5j27j56j57R2K04J36q8p3p5q1q2O3J75J50p3j92q0J24J22M4M4n0
1215G8n0mnn3n3L0J43Q9j36j69N6J50J52p9j90j60O5J39J40q7j98j33R2J90P8k5k5l2l1N2
1214B4N4lkj21j21J22J22m3m2m3m3M6M7J01J03j01j00K9J41J4k10j55P0N4n9j00J1Q6Q5jj
1213c6J4J4J3J4N0N0m4m3K1K1p3p2P7P8j19j21N7J69P1j53r1K1P1m2m4O8J24J2n7N6J42K9
1212B77k42k41o4J61J46L4J2J1J4r8j67N7J69N8j45j46P7P8j6j6O2O3o9o7M0L8K3q8j12J13
1210c8K37J2k00j99p3J52J57o6j02J1P4P2l1l1NNn2n2M6M6M5M5o6o8M6M4k5k5k5k5N7N6n5
1209b3n6O8O6m5m4L6L7k0j9P1P1j16j16R9R9q7q7M6M4o3j77lK20N1j74j10K64L14o1l19k07
1208b41J16K28J38q7o5o6k3k4k5k4P4P5l7l7M6M7j0j0m8m8N6N8l0j42k05J9J95J94K2K1p8
1207H9p9p0p1P8J90P4j51j40k8Q2Q0p4p5L7L8R0R0r7r5R2R3j8j29j44Q0J21J0NNkkM5M5o8
1205A01o7p4p5L8L8P1P3m1m0M9M9P0j55j48l6J48J49k7k6j38j40J33J32K0K0k7k7k6k7MLM
1204B8Mm9n0n1n0J13J11J%L0L1q2q1n4n3N8N9K8K8K8K8l3l3j30j31k2K04K59L5r4r4n0n2j5
1203g9j6M1M1q2q1J05J05K3K2P9P9j00j01m3m4j0j0lmL3J44J58o6j73n9M9N0MMMNj21j21O7
1202a00O6R0R1L5L4j56j55L1L2Q0Q2l1l1m9m9PPn4n4KLnnJ08J07rj0rj0J5J4r8r8L0L0L0L0
1200AN5N6j12j12L1L2Q6Q8j19j18N1N0N9O1NNj14j13N5N4qrqrJ16J18q9q8lmllL0K9j01j01
1199a32opooM5M6j1j1M5M4M5M6n4n2m6m7N5J66O8j56j90p8Q9Q8L5L3R1R0q1q2J2J3k1k1j9
1198a5k1l1l1O2O2J02J02o7o6j1j0o7o5p9p8N3N3J22J23q3q2O2O4j02k15o8J57M5o7qK16J54
1196B11p2j89j91JKJ68J67J02j23j54O9J86l9j10j09M5M4j20j22J60J58K0J9p4p3r2r1J14
1195i3J13PPOPP6P6r3r3m1m2J4J26P3j15k00j4K51K52j30k41n4J33P8j09p5L7L2q0j03RP0
1194a16O9nnnnklR0R1j04j04j04j05J15J15N8N8n8n9llJ22J24qql2l3K4K4p9p9M4M5k9j41
1193a11k8J60J69j7k07r5P6P4j15j16J14K26%j87p2J16J10p7j29j8J50J50n1n2n2n0qpppJ36
1192G5J37j44j43j0j0j1j0Q2Q1j1j23j03Q5J28J7l6l5m2m3J6J5J6J6jkR2R2M0M0L9M0p7p7
1190A33p7p6j1j1j1j2M8M6M8M7j04j04j1j1M3M2R8J00k07k08pJ81J96Rm3m3N0N0q1q1oopo
1189c2J3J4m3m2L0L0k7k6P2P2n9n8N6N6JJPOn0j61k6J60J18Ok3Q9K7q7j00j00K4K4J63J64
1188B99Jj88j45L9Q8k5j14lR0k2l4P6P7l6j41k9O7O9m5m4J1J0j%N5N6j17j17Q8Q8j3j4j3j3
1186@M0M1j6j6N1N2onr4r4l8l9Q6Q5Q6Q6p4p4p3p4K9K9K8K9j0j0j0j0L4L4k2k2q4q6J20J20
1185I3o2o0n4n4j2J01J99J2k18k19J3J4N2N2J01J00p1j85j03Q5K27J15r1r0R1R2L6p7r9Q6
1184G4J37n1j52j50Q0Q0j8j8P5P6o1o2L3L2o5o3o5o4J3J2O3O2Nj08j49L8K15K14j7k04j20
1183a58qJ24J22j8j9j8j9M6M5j22j23J03J02RRJ8J8o9o8M1J55P3j15o8M4Q2j06j44l2O2O1
1181B7j10j10J33J32R6R7j47j46J0RRRN3N3N2N3j09j09P2P2j8j29j30j7R3R3N9n4j07NM7M6
1180C4n2n4J26J27Kj11o1N0M3p0J%j7j7j6j7MNlll1j43q0J07K57J46j85j83J3J26n0j63l0
1179b45J56J00q6m2P2P0m0j5J71P0j18j57J03K13n1k61j50J08J07MMO0O0o7o6n9n9q0L3J46
1178a9L2l9m0O6O4q1q2R8R8Lj09j09LJ0J1J7J7K2K3K1K2m3m5J2J2p9p9L8J51J56M6p2p2j0
1177D3j0M0M0n7j68j12jJ33J31R7j6j21rR9J01r5k06k2K01J73n3r9r9m3m4O9O8M4M3p0o8k6
1175c7k6k6k7K1K1K0K1R1R3r5r4J18J19o8o8m0l9J6J5p0p0J16J16j7j8p2p4j5j5M1M2OOPN
1174ClkL1J45N0j76k30pK21J10p6p4J26J28j32k44p6J49J48p6p0M1J39K7r5r3J0J1J8K0J9
1173D2J9J2J2r9j00J32J33n5n5n3n5N8N7J6J6r6r7j9j9k0j9K02K04Ok19j44P9J13Kj4j3k1
1172Ej9p9p9J08J07L7L7p5p5J3J4J2J4j2j0j2j2P2P3n9n8k3k4p3p3J37K48K1j65p8J08J04
1170A84q3p9L4J5J5j0j1j0j0op%Jn9N2J01q5j76o5J05J03j1j2o8o8L3L3J25J26j13j12n8n7
1169a73j9k0J11J11K7K7k9k9p1p3p2p3J90J89q4q3MJ17P2j14q1L1l2l2L5K21J45j18k01j4
1168c8J03j0j18pM9o3j89p7J72J72M0M2M2M1j35j35L3L4k0k0L7L7k2k2J01J03j18k30m0J46
1167i2J10p7p9L3J05J07j7j8mlmmj21j22J15J13l6j48k0K04J79m5j75o1j3j2J1J22J44q0j78
1166f6o7Q9Q7j10j11J53J53r0q9K3K2Oj06J6K39J17j09k65m0J60J61Mk20j65O0P8P7kkO8O9
1164A40k6k5r7r8L3L3O2O4l0l0J1J0j19j20J21J20m8m7K0K0Mj09j30R5R3R2k1k0J09J10k7
1163A90k6q3q2J4J4J5J5K3K4j45j46J52J52n2j64r3J33O7m2j1J00P1j53j82o8L4J47J79J80
1162B63Rk17j35Q7P4l8j00J2P1P2L5L5j58j56k6J99J19j05k05J9J22J21k9l0p8p8J5J27J05
1161A30j21p3L9O5m5q5J39J46p8j63N9K23lk10r6J05J06j29j28L9M0n9n9J10J09qrj01j02
1160a59o2o2K19K18j07j07K4K4m1m2J2J24J05j20j75M9Q4k7m9O3J06oj03j04K9K9Q4Q5J57
1159B48J57j62j62k4k4p9q0k5k4L1L1J9J9M8M6j8j6P5P6p1p0j5j4K8K8k6k8Q4Q5rrr0q9P7
1158A7P8k4k5q0q1P6P4r2r3J33J31m5k70q0J44J65n9j18pQ6Q4j8k0j06j06J75K87J14j10j68
1156F2n5Lj08r6J68K18L1j73o1L2L3kjNOr4J8M8M8k5k6J06J06m5m6J1J1j60j59k4Q8M6o6j0
1155a11J03M3o8n4n5K4K3l3l3R8R7l3j44j0J76J31j31k04j6J42J42o9o7K5K4rj0J08J10p8
1154A21k64j17J45K54pj87p5Q7Q6j42j42J34K46J00j63j23O2Q3j04j51l7J8J9R4R3P5j11j54
1153a60m2J27J26L3L2Rj03j77o6J75J75M0p3r6r6O8J79R8q9j72o1L3L3N5N6mj16j26j4Q5Q3
1152A2m7m9Q2Q2K7K8o6o6q4q4Q4Q3j24j26J19J19K4K5l0l0QRL5L7O8O9j63j62o4J23J37K5
1151A01o7o7j8j8K4K4K4K4l5l5K1K1m2m1J26J28J7J7l9l9j70j71llM7M6J39J41r8r7K7K6r
1149Aj20l9J48J16Mq9q9k2k1P2P1K1K0j09j11Q2Q0N3N4LKk5k5n0m8k1k2R5R6P8j11k19j07
1148b32J36J36j4j3M2M3K2K1j46j47qrM8M8L5L6L4L5%%n6n5k2k2L4L4N0N0q0q1J4J4J4J4j8
1147d3j8L7L7O3O2l1l1qqM8M8j08j08R6R8r6r5P2P3NNq8q8P7P6j7j6l8l7J9J7prn8n8K0J31
1145B2Q7j00j27j6J16J15m1m1o8o9O5O4J21J21j72j71L3L4M3M4p9q1M1J52J95Pk02k01qJ79
1144F3J39K7o8o7l9l9N5N5J6J7J7J7m0m0j1j2K9K9o5o5K3K3Q0P9j15j14n9n8Q7Q6m4m3nnn
1143e2oRRp3p4n6J30J44L2k8k9l4l6j16j17J28J27K7K7k9j41j63K5J94J92n5n5J05J06j65
1142B6k78o0K02J38j23j67K2K13J00l0l1M7M6p8p7m5O8R7R8r0q8k9Q3P7l6n9n8j7j7j04j04
1140b74Q2J94O4m9k8k9l6l6O4O2P8l5o7M3R4j9p8p6M6M6qpM8M8n0n0J12J12n4j67j25O1K7
1139gj61j48L8J61J59MMj8j7q7K4K24J12j37k48n5J31M2j43r1R7J48l8j31j7J13J12p2p4N0
1138b5N0M3o8o2o2R1R1L1q2q1L1Q6k5j15lJ58M6j43j45J29K41K3j66j15lK3K4K9L1k8k7k8
1137e1k8O2O0l3l1L4L5n7n9m0l9J6J7K3K3P9Q0k9k8j1J00J28r8j95q3J08J08n1j62r6J30J52
1136F4M1o8o6j8j8MLO0O0J42J42j74k86k0K04K03j73l38j13K65K65rk33m2J82J29r6j87p4
1134a51R6R5k8k7j02j02O6O7K4K4K4K3M4M4n0m8O0O2L4j90j89L6J65N1r5r7J03J02P3P4P4
1133B62P3j96j96J0J0o0n9P2P1J0QN8N9Rj04q6J37J40q5k08J5K04R1j73j72m5J80J17Mq8q7
1132b9jkJ27J27m6j58m0P0j8j29j30N8J41K7p2p2R0Q9J6J6J6J6m9m9M4M4l9l8l8l8j9j9P5
1131c0P4jjn0n0p7L7J71J72o2j75m9O1J2r9l1l0k8k8J22L09J25k87l75L7L30K19r0k03o8M3
1130b2k7k7M3M2M3M3o7o6q1L1Q1l2j18oJ06J05j7j8k9k9j54j54J34K46N7j29q7J00J81nj09
1129C5j08J0J0mmmlq1q0N6J69Q1k9j53m1J27J26L6p6p3L8R6j8k21j10J06K17K1r2k1k1j05
1127a16j05M6L06J52j86k79N8L14N4k46k47J93J91n0n1J4J5m1m1Q3Q4m7j58m9J39J46L4j12
1126A01j10j19j19O8O8O8O6k3k5k5k5jjkjK5K4K4K4k3k3k4k3J58J58q4q5m3m1N0N1n9n8n9
1125h8n9J08J08o0o0K8K6k7k9R2R3l8l8P3P2r6k07m0J47M9o2nJ07R4r4n2O0R7r0j13kN3N4
1124A01o4o3pqJ46J46n5k41p9J08J07p9j49L7Q5k9r8J4L8L7K9K8K9L0o5o6K8K8k8k7K8K9Q4
1122G4Q4j44j44o2J64J20j02r2J32J83m3j91p9J18Qj36k5K09K10Mk21k19MM2M3JJJ30J32N9
1121B60j65j71n9P0O8j5j5j6j6k8k8O6O5k4k5k5k5Q2Q0N4j71j35Q9J76m9j44l2J59M7j16j17
1120a60Q2Q2M2M3j4j4o2o3opn1n1J55J54q5q5k9l0k9l0J40J38j29j30L9L9J3J4q1q1O0N9J45
1119F8J47j03k14m8J76J25r9j53m0JJO5O4J8J8l7l8M9M8qpN8N7p3p3K2K3l3l3Q2Q3j1j0j00
1118B5r9m3m4J59J57j20k32m1J84J83m1r0K1Q4j39j81M5J48J47n2n2M2M2q6q5q6q6J15J14
1116a1K0K1k0j8j2j2pJ04N1j72j61O4K98J86j33k44j5R6N7n5p8p9J5J4P1O9q6q8M4M4K4K2
1115IK4K4m3m2N0N1onQ8Q9q5q5k9k9m1m1Q8R0r3r3L8L8o9p0N4N5j9j30L5K60J1k13j21J05
1114a05K02k3k20MJ34K1r5J7J42J44j24j22L9J53Q6j40r1q9j1j1Q1Q0K6K5k6k5k5k5MMn2n2
1113g4O2O1k4k5m0P1J62o2j33j34R6R4J5J4J4J4n2n1M2M3kkkkl0l0n8n9P5P3J8J9p7p5J8J7
1111b4O5O6k8k8j05j05O3O4J1J2J05J05j64j63NNmmN0J62Q0j44j01J0j0j1l1l1L4L4O3O1m4
1110bm5j8j7N6N4j%o9o9j5R7J26r7k33j21J46J46K3q9k7J96J83P0j08j08J4J26Q9j37j96q4
1109a10L0L0j9j9R9R9o9o9M4M5M5M5j5j5p1p0QQO3O4j26j27LMJ7J7M5M4j8j9N9O1Q0j45j44
1108a26l2J08mj03j02Q2Q2j1j1M9N0m4m4M4M4m9m9Q6Q6q2q2P4P4k0j9j9j9l6j49j4K11K45
1106B20j29k88o3J80J80J1J2O7O8m8m8r0r0n6J69J76m9j79o5K4K5q7q7J19J18j13j13R3R2
1105D9k4k5L2L2n0m9M2M4n6n6j%L7L6j8j9l1l1K6K5mmj1j0K1r0p4J50J98k6j54m2J41J42r4
1104A06r4K5K5j35j37P3J84J9k06j64O1K28J13o1o1K4K5l4l5m2m2o1j73j42Q2K86K85n6n6
1103C7N3N2Rj02qJ05l1k18k04N8J23o4q5K8J35K3k1R2R1k1j03QO4m6r6J8J22J0q7q8R2R1M8
1101H5M7N4n8j34j34M6M6k2k2R1R0j36j36J19J18M6o6lmn8n9N3N2o4o5O0J71J5J6J24J24k1
1100C75k09j60K8L1q0j6J71J32j30j95rQ6k4p1J14J90p3k13k6J74O3j25j23J55J56j74j73
1099a26J34K48J1k52j97O4J92Oj28j29k4Q9O0n3j02J1J71J70j4j26r2K0m3m3K3J35Q7k6j7
1098D9R5j3j26n7J28J76q7j83LJ38K7j74o2J28J30j14j13P2P3m8m8O3O4j13j12P4J86P4j14
1097A16j20rN8O0m7m6J2J1J1J1j14j15P2P2o5o5rrO2O2O0O2l9l8J7J7K1K1r1r2J09J08p9p8
1096e4K0K0J9J9l8l9l8l9M5M6M4M6M8M8j40j38j8j8j8j7O2O2O2O0M4M4o8j80o2J26J30n7k25
1094b04l8J82J81p7p6L4L5K4K4l3l2o8o9M3M4P0P1j05j04m9J39K43N7j99l10q2J81K13K6l9
1093H2l9l1l1l1l1j8j8R4R3O4O4j69j67OJ93J44m3j04RJ40J39j55j55J3J3m4m4j00j01J43
1092h4J43M9N0p2p1O0O0qqj02j00l6l6N8N8O5O6j02j03J6J6J6J6n8n8L6L6N9N8j09j09J33
1091f1J33p2j84m3J44K30M4j41j39n9n8J06J06J07J06n0n0n1n0k2k4p9q0J16J15j5j5q7q8
1090a61NOR2R1p5p7m0m1N3N3P1O9k3k3%%%%j1j2j1j2P9Q1j4j3q9r0M2M2P9Q1n0n1l0k9l1l0
1088f9LMN9N9qqqrq3q5Q4Q3O1O2l2l2K2K3l1j43j07J18J23r9k13J2J52J52l0k9K7K7r2r3L8
1087f2L8kkN3N5q6q7J57J57j03j03j2J01J2k13q9J36J82m3j07j08m9m9Q2Q1J31J31p6p5r1
1086d1r3KJJ19J17n0n0o6o8j0j1J00J00M4M4l4l4l5l4M9M9j12j13K6J37Q4j40p2J52J47p9
1085A29j72o0O9O8n3n4P6P7rrj02j02J7J7J47J48j24j24L8L6k7j41q6J38J83m1j31j9J21J22
1084A32p7p6k4k4k4k4MLN9N9m2m2N1N0J4J4j17j17N3N4J09J10m0m0J6J6j13j13k0k0N7N8L8
1082a6p3k0J66J16p1j64K2J85jj68n6K17K18j47k59o6J21J65N3l2k18k52J1L07L08j71l58
1081a83o2K01J48j14o7J19J05q4r1K0R5j6m0l9j1j1M4M5j5j6LJ15R4r3j38k4n6n6m9m9K7K6
1080a72K7K7J04J03J0J1J6J7m0m0qqqrn0n2L5L5K1r0j89jJ98J96Qj79j13P4J25J27o5o4o3
1079a7o4K5K5l1l1N7N7N7N8k7k7j3j3j33Q9J54p1j84p3K06K06j23j23P7P6q4j96o7J57P3j50
1078a10p4L9M9M8N4N5o0o0P0P0q3q4KLM7o6j36Q9J01j2j1R9K13j2j23j21K2K3K2K3K5K5o9
1076E8o8j7j6j6j7KKKKO9P1P1P1r9r9m2m3Q0Q0n1n0L2L3k3k3p9q0J3J3M6M6M5M6q8q9l3l2
1075a83J26J26L3L3k8k8O6O5k08k07k9J95J87l7j02j02K2K2P8P8k0k0O6O7j06k17q1J43R8
1074C7j3j2R9qk33j09J16K72M8j31j29M3M3M3M4J7J8j88j89P0O9O9O8K0K0K0K0llj34j34R7
1073e3R5p1p2R0R0L4L4n6n6n5n6O6O5o4o4K6K7l0l0M3M1M3M3j31j32L6L7P1P1r7r8N8N7l7
1071g5l7O5O4QRrrrqk0k0L7L6K6K6o7o7L2L1k3k5K2K0K2K1L3L2r9r8N7N6%Jl1l0K5K4m5m5
1070g0J1J1RJ0m7m7LKLKL6L5L6L5k1k0p7p6l7l7K07K06l7l7l6l7j9j8k0j9L1L1L1L1j1j1M5
1068I8M5k3k3k3k3L9L9r3r1jjjjL1L1Q7Q8p6p5J8J9n5n3L9L8N1N1m3m3o7o8K6K6P4P5n6n6
1067CJ24J23q2q3m0m1l9m0N9N8O0N9o1o0mmmmn9o0L1L1k5k5N9N8LLK4K4l2l3l3l5R6R7L1L1
1066B10j01j00m8m9PQJ4J4J4J4J9K0K1K0o2o1ooK8K8k1k2LJ15J79m6j89j88J16J15pqM2M2
1064A15m0j51j59O6O3O4P6P8n1n0m9n0j1j0L9L9L0q2m2J44J60k8q0p9NLrJ01O4m8n4O0N0j38
1063B6j92pJ62M8m4m5P8P8n2n2P4P4j62j63M3J54L0q0k4Q9L3p9l0Q2K6q5n9N3j7j7nnQ8Q8
1062A08k1k1k2k1m4m5J6J28J74O2j12k23j73J4J09J07n5n6k6Q7O9O9n5n5j45j46Q8K75J45
1061B31j18k38n2J05pj65n1J79J79k4j35J3J25L2p9q1L1Q0l1j4j3P3P3J1J2n0j61j32j9J80
1059d6J80rj95j09P9J36K4o3M7J51L8j28j27j17lO4O4RQm5m7M9M8q1q2J02J02M6M6RJ0LKo0
1058A05j72j28N9J81P0r9r8k2k2L5L5L8L7L8L8P0P0j73j73nmnnJ38J40j05j03N5N4N5N5k9
1057A30l0j22j23J04J02k8k8J7J8l9l8P0P2j8k04j37N1J66N2m1m3M4M3n5n5JJP1P0k2k3L5
1056D1L5k1k1j19j20j01Q7J89P6r2r2J12J11k0j9K2K2j08j09J04J04k0k0J0J23Qj80j39M8
1055h9R8J00MMq2q2K3J35K5j61j57J04J89Jj38k6R2k0r1r3J07J06k3k2J09J09j10j10k3k3
1053d4L0q2p5J13J42L0o3o2O7O8r4r2M7J58P7j10q9K4O8m5j36j37O2O2Q1Q2Q2Q2j64j63ON
1052g0llN3N2J9J9l8l6L7L7n6n5O0O1j44j45j7j8j0j0P5J87O7j19j79o7K03K01J04q4j39M6
1051B8J37J36j33k44o8J19J63N2q9q9kkJ5J5m1m1N6N8l7l6L7L8n6n5N3N5kkl3l2K4K4j3j3
1050B2o9p0p4p5J32J32j6j5j6j6K1K1K1J9o6o7O4O4j7j7j7j7J9J9J8J9K1K1K1K1j7j8j7j8
1048C3l4l5Q1Q2J4k10j48l5J04J04J7J8RJ1J0J1PPR4R4j15k28o1J63J65n8k49k6K12K12j30
1047A19j29l6l6l7l6N1N2nnO9P1k4k3p1p1j6j5N0N0M9N0QQj60j61O2O1O2O2N5N6p6p4K7K5
1046A2k8l0P1P3J6J6o0o0n8o0KLR6R5MMn2n1j9j9L7L6j00j02J05J04%jn5n7J08J10o0n9L2
1045E3L2o2o0M7M9m5m4j6j5M0M0l5l5l5l5Q7Q5q1q2O1O1O1O1p6p4J8J7Q8Q9j17j17J8J9l1
1043c4l1M8J59O2j63j31k1P2P0K5K5l1l1P9P9j27j26nmN1N1J26J27n2k75j21J04J90l4j09
1042b7MQ2l0k7k6K1K1PPJ3J4q3K8J55p0j95q4J58J56n5n6n4n6M4M4n0m9Q8Q6noq8q9J17J16
1041A11j2j2j3j2n6n4L8L7J00R9j74j74K5J36M6j78j16J10J51p2j56j55P5P4J14J13n3n5p
1040g0qM9M7L3L3r8r8N6N6%%K3K4o2o2j0J02J02j0k9l0J9K0o7o7o7o7N0N0O4m8n0O2J52J53
1038B52Jj12j12JL2L3q5q4MJ16L0q1j09NO5O4J9K0l7l6l6l6k9k9l2Q0J36K4K0K1K8q5p7L4
1037ER1k2j42l1O8O6q1q1M9M9N7N8N8N7j13j12j4R7N4n8j48j49J06K18J42j21j65n2J11J10
1036A07n4n3L8M0m4m2k0R1L0q4q2L0J07nr5r6J19K30P8j83j97q6J10J08M8o5n7n7N7N6p3p4
1035a18M5M4j1j24p2J15K33J22q5q6l6l5MLN9O0K1K1o5o6o4M6J03rj44j44j5R7J38K6MLm5
1033B5m3n9N4J12%j23j2J97J99j51k63q4J04O0n0RJ20K7q5k2Q9o0k47p1K66K14j23k41K1J99
1032F2J4r8r9K8K8j8R4J88P6o6o6o7o6o4M7P7P7k1k1L5L5j02j02l8l9j5R7R7j5m0l8m0m0n7
1031a57N6O2n0j04QJ45J43n8n6kjp2p1R7R6q5q7J2J24O0n2p5p6L6L6L5L6j08j09K8J40J04
1030E5pr3J9J21J22j15k26j28O0J11jk7Q6Q4k7k4Q8J30n7k21j09J35J34n5n5P5P6o7o7K7K7
1029G1q6q6n7N7K6K5k3k3O3O2P7l5n2O1Q4Q5j08j08K4K4j3j3j2j3N4N4m4j56q0L3K6K6k1R1
1027A3R9j4q6K7J52L9j85j83J5J5J5J4J34K2j32j32J73J71l1j43o2J25O4m9J3J25Lj09n3N9
1026I9k9j40j19O7N0N0M9N0Lj84k41n4J33J33J3J3M3M4j3j2N2N3l4l3p1M1L4L2j29j30P6J88
1025C4J02q5j29j7M1M0M6M8O9P0o1o2j01j03N9N9O2m9q0q0n2n2RJ21J40K8l2l2PPN6N7J0j02
1024B8j65n3O1n2r4R3K95J84j98j98%J86L0j56j27O1J74O3j11j09q7K5R4R2r8r9L4J46R1k1
1022H9k1k1K9K8LKn3n4m6m6M7M5n7n9o5M7J52J54qpp3p2p1p3K6K6l0l1J14J13N7N8m1m1r7
1021B4r6L9L7m7m7P0J82K1r2j7R5J0j77o7J19J15p3j55m3K0K0MJ17M4j41j51J11J83P2m2m2
1020I3K6q7j80OJ37J36n4n3P7P7o5o6o4o6m1m2m1m2M2M1M2M2J57J59q5j97p2J15J19o8j13
1019f7P3P4j13j59K9J14Jl3P9O9j16j43M4K34J21j06j06k0k0p3p3J71J70m8m8m9m7KLR4R6
1018A53p5p5j8j9M4M4m9m9p2p2N9N9N0N0N1N1q2q1J3J2J5J7J7J7j16j17N2N2k7k6J04J04p0
1016A6o9K4K4Q4Q4rrr2r2JJk0k0P3P3l5l5N8N8j75j75O7O8N2N0lnRJ1J1J0j51j53R2R1K1K1
1015d4K1K2p9p9K26K26r9l22j13K61K45j31k35j1K16J05j37j36K9K9K7K9M4M4q8q6j4j4J16
1014E2J17l1l0l1l0LMMLr5r6kkP5P4P5P5o5o4K9L0ono0j70j00J26K87O2j80j79J22K34kk26
1013bj33R1O2m8k8k9P8P6K1K1j07j06J22J23rk32j09J16L12K01n0k75j82M1J07J07j19j18
1011f9J2J2P3P3P3P3m2m2m1m2l5l5K2K1j32j34L6L5O5O5O4O5j17j15K4K49J40q5j76o2O3O4
1010A02k2k3JJn5n5j7j7Mj09q0J44K30Pk23k23J16K28N3j71j0K14J48p6j00J2M6o8j15mN7
1009eN6o6o7LLO0N8m0l9J7J6n1n2Q0P8m4m4M1M2k8j39j48P7J16J15L6L6ONq8q7j04j03J37
1008a23K49J00j25j47l6M6M5lln0n1Q0P9mnnnj19j21J60J60m7m6M0M0nj17J1K35L5j89j89
1007a10L6K20lk06r4J29J28M2M3j05j05l9J84J56o9k34j23J44J44n5n5L8L7n6n5K1K3K2K2
1005H0r8j00O9O9k2k2k2k2k1k2m2P0J29r4j44Q1J60J61j06j04o4o4L0L0P9Q0j25j26N7N6L
1004d4j10j11J15J74O2p5p5P9P9l6j48q7J37Q7k4j03QM6M4mmMLn2n3K8K7k8k9M4M4m9n0J03
1003BJ04k8k7LLN9O0NOq9q8J5J5J5J4m5m5m5m6P4P3n6n7J28J29j76j75N9K82J29r6k06J7M1
1002E4p1j16lN7N8P5P6j7j7j17j19J26J25o0o0lmL9M1n3n2l8l8R4R2k0k0p5p7L1L1L1L0o8
1000f8o9O3O2k0k0mJ08N4j69j21J04L18R3j90j89P9J91J9k07j26j5RQJ30K43L9j86k09J5K18
999A60J07k18k17j15J11O5m7m0P3J52M1n7n7N1N2p2p2K1J33P3j51j22j0J5J4JJ12J77m8j62
998c0j62O6O7m2m2N1N2P0P1J4J5j6j6p2p1k5k5L1L1L0K9L0K9o2o2L0L0Q9Q8m3m3K4K3j44j44
997a29P1P1P2P2j23j21QRL8L6j7j8Q1Q2j17j16pJ05N1j72j98K8J95Q1m7m7P7P7r5r5L3J45
995C0O8j57j58O8K14J02j32j31J0J21P3l9p6L6R0R0rj21j43j44JJ13J05q0j20pK24K24Jj87
994F6j43l2J00J00k4k4n2n4J07J08K8q4q4K9NNNOJj09j18oJ28J5m6m6J28J30l9l9J5J4J5J5
993A20l4l3q9r0M1M0j6j5J02J04j32j33J06K18qj95j24O5O4j24n5J32J73q8j28O0K06R4j22
992A39j23J07J07rj21j21rM2M2R9R9n4j66j65n3J13J13j6j27j9R4Q5k6l0k9L3p8q3L0J6J6
991i4KKLKk1k1J10J10k9k8k9k7QQPQJ8J8J8J8r1r3l6l5J19J18j1j24m3J43J44m3j54m1J26
989F2J27n0n0n0m9nnO4m7q3L0R0R1p9p7Q9R0j37j36kJ12P3l8k3k4QPQPL0L1o3o2L2L2L3L3
988F9J0Rm6m6LKKLO7O6k7j38r8Q9J49l8j99j3J51J51j51j50qJ05O3O4J6J5JJq6q4j08NJ11
987d0J09r0r1J08J07l7j49k6Q7O8m5o6o8K6K7l0l0N7N7O9m1o7M6J05J06j37j35l2Q2oo%JJ8
985b3J7J6J7k7k6O6O7o6o4K7J40L3j56k40n5J61J60NMM1M2j5j4o6o5J01J03j57j55k5k6J14
984f6J12n5n6k9l0K7K6r9j00J36J36J5r7n3J33J20Qj1j2J9J8j06j05MJ15P7j11j60K5J82J83
983B46j35k46n3J34P7l5l5P7O7j18j69J9L4L5M7M6J77J78j79j77k3k4k3k3JKJKJ7J8J8J7J15
982H8J16O5j23k10k4J02J03p3p1J20J22m9k35p9J08J16p0j83p3J39J38n9o0j3j4Q1P9K8K7
981I6o6o5K7K5Q3Q3m0m0l9m0L6L7n5j66j18J08K35J25j04k15k3Q9Pj06m5J80J54p0k62l7J89
979a7J88p5j87PK30P0j55k40j6J25J24o8o9K5K6k7k7k7k7J30J28p8p6q4q3RJ0O3O2O2O3L1
978I7L1k4k5l4l5M3o8j50P5K09R9j26j25O6O7j00k10l9J87R7j5l1l1l1l1O2O2l8l8R2R3RR
977A47j3J01K7j97j10J13J64o1j23j0J15Jj34j33j0j1J06J06P0j54j62O3J01j2r8J4J10jj31
976a22k0J79O8j05j05J11J12j61j62R8K10K0j66j27O1P4P4O3O3j36j36NJ16l9j53J5K02J23
975A62j40j79Q3K63J51q7q6l7l7j07j07K8J40J63N0q6q6j9k0m8m6N7N8L5p7qJ04K1j67k05
974b27j8K14K14k1j33j05QP0P1m6m5p4L8LLNNO0O1J9J8o8o7q5K8L5p7m5O8P3m0j10P7J96Q5
972A90r0r0L4L4n3n3LKj28j29PJ20J28J5j14j13K9J43J97Q6p4p4m6m5m2O9J32J31oj19j42
971Bj41k6Q7P9Q0n1n0p2p2N9J72J04j58k02N9K06K0j72j72J34J34j4j2P2P4J7r6l9P3m4m4
970Gm3O7M0M1rrq7q5r4J9Q7Q6%%M2M3q2q1k5Q7L9p3o1N2N5n5o5J22K09K3j39j37K5K5j19p
969a02J30J9j77o5K12K14p0j82J2J1r9j01J37J35k8j39j7R7n1j64L4K20J83mr3r3o9p0K8J40
967D8K1r1l5P6K8q3j05PN9O0J0Rp0p1K3K3k1k1O7O6M2o8o8M3J8J8K4K4n5n6L8J49O3j26j31
966h5k0O9O8n5n5l1l1J00J00K2K1K2K2n8n8j50j52J10J10J09J10k25k27m8J77J63o0j48P7
965a23K21J10j32j31M1M0J3J3m0m0j3j3QQJ99K00p3k98j91J84J90l4j90p8J06J06n5n5j27
964a54j26J3K39K09j4j46Q0K93O9k97k97Q1P9m8j61%K24R4j31p5L7K9q3K4J35L8j86q4J42
963a6J68n5j50P3J30r5l08q4K67K67J7k09j79M5L6L6ooJ7J7J7J6P3P5q8q6K5J37J08j18r8
962B6r8J9J8Q4Q5j19k31l7J88K22j52k22LK67M3j84p2J32J30j56j57Q0P9l7j50j4K11J36K6
960A20RRq9q8o0o1R5R5R5R6j94j93K1K46J15j09j29R3R3j9j07OQ5k8q9q8M6M6rqj2j2o8o8
959a61N8N7N6N8j29j30P6P6J6J7P2P2j10j08n4n3Q7Q8N8O0j03j02J02J03m5m5M2M2kj13o0
958g5J64N4j70j72N4K88O4j52j50N0M9P9P9r2r0l6l5M4M5P1P3m7m7J0Rj4j5j4j5J8J8j12j13
957a80J15J13K1K1jjk9k9NOq8q8L3L3L3L3k3k2O4O4J3r8n0O2J18Pr3r1M6M4m7m8k2k3l6P6
955f2Q8k3j16nJ37K6j46j48J55J53j4j26LJ90J34n4j07Ol4l4n3N8J16Kj47j48J4J3K5K5N3
954a9N2L0L0k6k7n0n1n9N4M8M6l8l9j2j1j1j1M9M7M9M9m2m2m0m2P0P1k3k3Q9Q8m7j59j8R3
953G5Q0j07j58m6J53J52P4l7j06j05q5q5Q4Q4J31J31l8j50j04Q1J26J4j46j45N3N3k2k1l6
952a00P6P2m1o2o4N0N0K1K1k3k2NNj6j7M0L9j2j2j1j2jkj6R6J49L6j31j29o7M5L7L9l6l4r2
950a19r2O0N9N9N9P6P6j8j7j08j07q4K8J36K4j03j05M7J59kj14j4R9O9m2k6Q4K2r1j03j04
949a92j7j7K03K03J5k46j47J91K69Qj33k1L2q2j65K0J40K8o6o5K1K1k0j9M3M4o1N0J14Kr5
948E8J8J42K9j90j89M7M6l7l7qrO1O1J21o6j99j4K18K18j21k33M1J52l5j46m6O6k9l0J33J34
947A56q7k74o2K75K15j23k01O0K03J7j43j41k2k2k2k2Q1Q1K5K3O1O1%j12k05r3J11J11l3j44
946b26k1R2J14JQQJ3r9n1O2J35K3%jLMr0r1N5N5M6M8Oj06j07NJ00R8L9p4m4m4NMp0p1p7L4
944b14N5N5O2O1M7M7m6m7k1k2L4L4n5n7%%L0L0n6n7nJ07J30J31m4j56j56m4R2R0o3o3L3J46
943G8J01q5j13jR1R3j2j2j2j1p0o8j3j3NMO0O1j24j26M4M3j9j9P5J86N8j29r1J9N3j33j27
942b07O0N6N6k5k6J52J53r0r0o5o6rj0J08J06J4J4p8p7k2k2P5P7j17j18m3J44J95Q3m3m3n0
940I2n0jjjjj9j8L7L8k2k2k2k1jjjjL5L7n6n6J9J9J9J9K8K7K8K7m6m6m6m6j9j9p6p5R9J00
939d3M3M2PPp8q0mJ07O8j18j72J5K05R2p4p2Q7Q8j01j00O8O7j07j08O1J73L7j49n6J30M7o6
938A6o0N0O6m8m6O4R4j9q0p9k8k7K9K9J8J9J7J8LKn2n4n1n2Q0Q0O5O6m7m6m2m3J3J3M5M5m
936E4mn2N9J72N9j83j81m5J42R3r5r7J6JJQQl7l8NJ16N4n9n9N3P0m2K2K2K9q2l7P3Q9r7j61
935a23m8R9R8ooN0N0o3o1P9Q1j00r9N4J67L3j54j68J8Q8Q7n5n3N6N8q8q9j8J68J30n7j15m
934Iooj8R3O5j23j27O1J71j5j47l6J86J86j43k56j28O0K2r1n5J32J95Q3m4m4rJ04P2m0k6k7
932I8NNj01j00RJ20J62k4j62j60J8J31N1n9o1N1L2p9p9L3J30J9r8r8K6K7K7K6K7K6q5q6L3
931a36L2L3L3L9M0p2p3L3L4p2p3O7J77O6m6l6l6m2m4J22J22Nj08q6K5J2J2J%m8m9r7J6O5O5
930a9J9J8P6P5o1o1nnrro3o5P8P7l4l3K9L0j1j24m8O5O4m8n5N8J62N0j16j15oJ06M4o7j7R6
929G6M3j43j45M4J93Q2j05j05M6M5n8o0J7J28K4q8m9O3J12%j6j6p3p1k5Q6R5j8j61n0J35J35
927A41Pj06m2m2L3L3L4L3p1p0K3K2R3R5%%r1r1KKM0M0n4n2M9N0N8n5j06j06K2J34K9q2j33
926a61k0Q4Q3mlM1M2q1q2k7Q6J08J09J1j02j07MJ21J0j56j57L2J45Q7k4LLJ0j02r4J9m4m5
925b11o2N1Q1Q1J04J04Q6j02j48l6K0K1l5l5Q8Q9Mj08j08LO2O1k3k5K8K7k7k8JJm8m8J2J25
923EJ32K0n4N9N8n4j26j5P3m0r5r7K7K8l6l6R6R4L3L3o1o0Q7Q7j0j23q2K9L3p8j15P3J16N
922Fl5l6R0k2j08J14J22j02j94L0K67M2k79j68J86J85j71j72J19L42Lk21r2J33J12j13j11
921g3J11J39q6j76o5O4O5J5J5Q1Q0K5K5j54j53N2N1R0R0mmj97j97M4J56J18j07o5o6M3M3R8
920E8J00j90j92j3K12J13j10j60O4J33K1o9p0K7K6K6K5l4l6R4R6m9m8NJ18Q1j45j92L1J03
919B5J04j26j25NMO0O0QQQQk6k6L0L0n3n4P6P8n3n2n3n2PPJ01J01j8j7j7j8oooor1r2M0M0
917i7P6P5j11j11O1O1N9O1K3K2r1q9R9R9j3j24r8Q9R4r3j20O8J17o7j80o8J20J20r4r4R3R3
916b0J2J2J2J2M6M5M5M5j80j80M0K27N5j33j33k2QQN3J64K7j59j54L4P7P5L2L1K9K8j59j59
915a82Q7Q8Q6Q7k16k18LJ90J64k3j56m4K4K4L1L1N7N7j21j23N7J69Q4j79j87P5L53J67k66
914A19k65k4K37P8j09m8J38J08q0j39k5K5K7L3L3j30j31J0J96J62j00j22j1R7j4j%k3k4k2
913ek3K6K5l6l8R1k0j32k1Q6Q5j9j9R9J01q8q7m2m3nJ06K33M6k47k46JJ14n5n5M1J52M8o4
911Ij5R5M0p3r5J7N7N9p1p1j35k2J56J55M6o7q5K4l6l7j4R7R2r6j87p5J13J12m2m2J4J4P3
910A0P4Q1l1l5l5P7l5j07j07J39J41j3j25o1o2L6L5L4L5n0n0J3J3n2O1J72O1j93j92qJ05O2
909gn2J3J23MMJ1J1j26j26O1J73P1j17p4L7j2j25n5J33Q7k5o8M3QQlJ08J08p8j42k9R4R6q5
907F9q3j6j6j6j6J4J5m2m2O8O8J1J2l5l6N7N7J5J6J5J5n0n0n0n0n6n5O8O9L8p4p4L8J26J27
906A37jj14j22j0Q9Q8j36j36nJ07P1j16j17P1J68N4kjJ17J17j19j20lJ10K3r0q6K5Q1l1j91
905a42q1J62J60l8j49M4J55k9k16k5K37P9j82j78Q4J60k6j15P2J52l3j48l6L1L1l3P9Q8k4
904G9j47l7J12J13m8m9J13J13o0j73l5P6J00J00J2J2q1q2rrrrJ4J4J5J4p3p1K0K2l8l8k2Q9
903B8Q0j44j31j9P6P5j2j1J9K0j12j12J30J29P3P4k2k3p8p7O0O1O1O1o7o6j0rm4m3j00j00
901b33R1R1p8p7O8O9O9O8r0r0J15J15n3n3n2n3j8j7R9R9R6j29j21j0O6O5k1j9O7O9r8k10j56
900c31P0K03K01O6j59r5J7K7K6k2k1nmnnj1j1j1j1M1M0j5j6MMn3n3Q8Q8m4m2ppo3o4J20J18
899E8K6K5j06j06J60J60L2j94k49k4J38J37j7j6j%k1R1J12j14j73o1J09J08n2n2Q6Q6m5j56
898e9n8J29Q1l2r4r6O7O5prj02j02J02J02J00J02j64j63P9P9j8j8l7P5P4j12j18O9J34n3j40
896a24M5J94Q2j62j61Q5Q4rqL8L8r3r2J01J02n7k43j10J53J61k4m4O7N7n6j92j93Q1J94J11
895B5p5j32N6K03R2j77j78k0J68J67j9j08j06J2J2P3P3r5r5l3l3R1R1L4p5j26O2K04R4p6p5
894C4P5P5j25j23L3J44O3j24n0O2M8j39j30N7J34K2m8m7P5P6M5M6q6j97q9R9J43L1j08j08
893a12R0R0j1j1j2j1O7O6J0J0o5o4o4o4o5o4J04J05nmmmNNn1n1L1L0L1L0J21J22m8m8j23j22
891h6Q3Q2k2k3p7p9K2K2P8P8q2q4QJ20J21j03j25j5J54J54m4m5q0q0J4J2RQRQk8k7k8k9m8
890a23m8M6M5M2M1M1M2rqo5o4O4O6o6o5J2J3J3J2m7m8P0O9P4j49j58O7J80O8k3k3M1M1j64
889a3j64J04J04k5j36r2J33J55M3j35j36p1J54K40J28p5p6l3l4j27j27J34J34l4l3qqn7n7
888a12RJ20K9j94j61O4J93Q0m9m9L7L6NNNNm8m9PPL5L3L4L4n3n3LKn7n7L7L7j09j08J98L10
886B26J37k39k09J4R6j6j02J0J19Pj90q0J77J77k0j31q0J45P5l8j06j08R1R1k7k6k6k7L9L8
885A7n4n5M4M4M3M4q2q0J2J2J30J32j74j72RK33J48p7k52j41L1J43Q6k5M5M4j7j8k5k4m5j58
884a82o7J58K02k2k87o4J96J95o9j80pK18K3q9j2J00L6p6m5m4m5m6K4J36J13j12j29j8J03
883A0J04R3k0j18j18K2J34J0j02k6Q5P1j16j58m8Q4Q5K1K1K2K2l1l1K5K5Q9Q9L3j54j57m6
882h0Q5Q6o2o1L2J43O0j27j70n9J01J01J0j01j8R5Q8k4j09j10N2N2L5L6k0k0j5j5L3L3N7n6
881E2q5q7P8P6p8p9L3K21J43j18k49o3R7R6q2q3J16J16q6j97l6P6N0o3L0J42L6p6p1M3K2K3
879cm0P0Q2l1j17oJ27J29j46k58j16P2J54M2j1j1O8O9n3j64p2M1J16J14l9l8l5P6K0r1kkJ02
878D7J03l4l4P1P1m2j55j11J11J17Nj06j04q7q6J01J01l9m0O6O5k3j36k6J97O7j58k15J0K16
877d8j0j22J03K16qj26j2J46L5j58j57J53J54j06k17l7J89J18OL6L6j55k68K1K44J40q5j53
876f5P1J07nn9n7M5M7M0M0p3p2j3j2j2j3j9k0R2R3j28j28J34J33J3J4j00r8lmN2N3N0M9M9
875B01N0j78j76K0K43J21j05k77n3O7O7l2l1M5M3j0j2jjL3J46J38q6k67m2J25J26j96j97J10
873a29J10MMn4N8noK2K3K3K3m5m3m5m5Q9Q8k8j40j03J0N2N2L0L0k0j9m2P0J19o8j38k6Q5Q5
872B1r6r7R5K07N0o2o1N0kj14j07NJ04J04jjp1o9q5K8K06R4j02k14o7M5Q7Q6J7J7J7J7RJ0
871A20j03j02L8L9j8j7JJKJJ2J2J1J1n9o0n9o0O2O2O2O1K9L0K9L0NNj08j06JJm8m8O1J73J52
869B23j10j87p6R9R9j6j28k4R0J04p%%P3m0l9m0Q3l0j41k9J37J38j78j78L0K54Q1j44j52P1
868c7J77m8j27j5J57M6j21j20O0N9l0k8l0k9N9N9n2n3K2K2K2K2k8k8K8K8O2O2j25j24K9K8
867e3K9K7M0M0p3p2J1J2J1J2j24j24J37K48J00j25j66n5Q5Q4L6L6J0J1m6m7m0l9nJ07J44q1
866A30j97q6J05J04o8o8O0J72N6j69j11%L6L6j6j5j6j6RQr7r7J19K30J14j11j52m0onQ2Q1
864G2k7j40n6J67J20j06j92L1J52J54J2J2k35k36N5K78J91j85j73N0J53p2j48P5K54L1j43
863I4l1Q9j36l10q5K49J36r1r2J57J55j11k22r9J26L2L3M7M7RQJ0Rj56j57J73J72k8j39l1
862a42J93J55p1j13jL8p3j23j1M5M6N3N2M0M0p3p2R4R5M8j78k07J6J38J37p6p6k0k0m1m2P2
861g7P1M9N0oom9m7QPJ17J16j46j45n8n8N5N4J8J7J8J7k4k5Q7Q8r9r7r9r9K03K01Q1j45n8
860A9J68J11j14l65j41K06K04r9j00J3J3RRO5O4l3l1l3l3k7k7Q4J94J06j18r8r7k7k8K9K9
859d8R7R9p0p0o7o8J37J39n0n1M4M3j06j06j7J69J33n5l1l1k3k2mJ08J6j71j65K3J33J32k4
857I4k4l1l2l0l2KLN7N9o5o5K8K8l9m0k1R1J40m8r7J3N5n5j44l1P1P2K1K1jllkL4L5r4r6J01
856b8J00PQj9j8j9j8k2k3k4k3P7P7j28j29O0O1O1O0j6j6K8K9P4j13k01r0J88J87pj93r1R7
855f4M9o3pJ05J40m7j58j60klM1M2j5j5N0N1N1M9oppoQ9Q9j54j54R9R7l2l3QRp3p4k7J59J24
853A45J3o9M4M4o8q6K6K7q5p0M3J66N5j21j20M0M0M5M5q6q4l0l0K6K6J0J0J0J0jkkkj02j03
852b36J04J04Q8Q9m1m2p6p7N4N3K1K1p2p3P3P1r5r6K5K6Q1Q2l1l1K6K6qqj00j02l6l6J33J32
851D9k8k7O4O6K5K6j43j42QRJ01J03r1r0l5l5L3L2L3L3R6R7j09j09l1l1O2O2K2K3l4l3l8l8
849g0R2R3J0J0j22j20J2J2J3J2J5J4J5J4j9k1p6p7P9P9j4j5J06J06r9r9L0L0k5j39j4J72J66
848A70k2p2p2j9k0mJ07O9j19j06Q0J31n5j77o5J77J78j08j08j5j5J2J2J2J1j6j6j6j6R0R2
847A00kkn0n0NPM3M4j2j2k2k2J10J09j47j47K2J33K2j63o7M6O8m2m8O5J63k3j54j55J02J00
846B1Qj03p6J12J30J31o5o4o5o4K8K6K8K8n7n7n7n8j7j8P6P6Q9R0p9p8K3K4Q0Q0p8p7J6J5
844F8jkn8n6kkkkMMR7R7j48j49K0J32L1j55j00Q8J54M3J7J7O4m8p9p8l0l0l7P6J35J37NOk4
843A92j37q6K5J06nj66n5J79J80j9k07j33k1L4L5J03J03r7k10k6K35J87%j08j07M9M9m3m3
842A4J3J3o1o3l9P3J12%j34j36J52J50J5r7p1M0K5K6k8k7k7k8Q2Q4p8p7N6J68j7k03j09J53
841a9J10p6j68J8J43J45o5o6o4o5POPOQ5Q7O2m9j31j9MMJ2J3J2J1M8M8K5q8j40k8L3L3J5J5
839b9k9l0p8J08K40N2k22k20n8J30J05J04K3K3l9l9l9l8M3M4j2j2LKj20j22J7J29P9l1m9O4
838aJ12%m5m6M2M1k8k7k1k1j48l7J36J36K4q7q7K5M1M2p4p4j12JJ44J42o1o0L7J49L0q2q2
837IL1N0o2j22j23NNJ25J24K7j59j74o2M4M4k0R3K00Q8j15j15OJ17N5N5J4J4m3m2o2o1ooR7
836C1R8k6k6m7O4O5m8o7o7j9j8P9Q0Q7k6j09j09J4J4L9M0m7m6j0J02J03rpoj3j4r4r3P5P3
834F3j6j6j6j5p6p6N6J67J39m8j31j7O3O3j36j35K0K1K0K1J00J02l0l0o1o1L1L3R1R1p8j90
833e1r3R3J07nm2P1J61k5j57j55L9L8k7k7O6O6j4j4o9p1Q0P9q1q2M6J56M3j43k08k1K07R4
832F1k7k7J28J28r4k07q7J00Q0l2j2j2r0r0M1J53J31n6p5L7O6j21j67n4J23J21O1O2J9j67
831gk25l7K35K33p3p3l4l3l5l4J70J71p3p3j3j3j06j07L3L4k3j36l1J56J56l2j17nJ3J4j9
829h4j8J12J13o5o4qrP3P4n8n8k4k5L2L0p8p9R0K02J00q7j31j9J1J2j05j05P1J83J01q5k16
828a14j05J02K13P8j09j53m1R2R1j06j07P8P8j5j28p5J14J57M5o7o6N6N8k0k0p5p7qqQ5Q5
827C8L9L9r2r1QPL6L4llr5r7M8M7K7K6N7J70N1j37k01q9Q0P9P4P5n6n6j3j1n6n7KJ89J02q4
826H7n6N7M7j38j59J04J87%j58m7J17Mj16mJ56M4j13j12Q6Q5j57j58k0J68J21J22Kj11k07
825a69k2K08K08l3k58o6J58J17j09j23j3llR7R6R3R2j13j14n2n4LLQ9R0p7j88o8J57J14Kn7
823En6K9K9j4j4r4r4j0K15J72n2k32pJ27J6j63n2J52J51j22k35k4K01P8l3JJ13n2j62k8J96
822D1K21mj70n8M1M1j44j45K5K48J55o9j72j71N8N8R4R5KKp3p3K2K1lkn7n9J3J3O8P0O2O3
821B13o8o9ooK2K2l7l8J9J9mmo1o0mmN1N1m0m2N1N2j4j5o9p1L8L7RJ0l6l5ppJ04J05M0j85
819c9j98K6K26K28Mk22j64O0P2P0qqn8n8L5L5M0L9r0r1j4j3M2M3K6K4o7o8O0O1L1L2O7O6k7
818A62k7n9n9n8o0M0M0J32J34q7q7j14j15J1J1L9L9KKk6k6J3J2O9O8j06j06j3j3J11J10k0
817A9j9L0L0k6k6K3K2K2K2m7m6k5j38n1J75L52k2l38k26J91L03l0k53j23J02L5p8m0J84J16
816A38Mq7q7P6P7M9M9j31j30L8L7N1N1m2m3j14j15R1R0m7m8OJ17J07j18j41k9N1N1p4p3J2
814a84J2j7j6J55J54Q9j36j35Q8J68n6j57j57J09J09m2m3Q8Q8M2M2j26j26k7k7L0K9MMLMj11
813a42j10R6R5PPk1k1N4N4N4N5k9k9k9k9n6n7jjR8R6o4o4J3J25L4j90j37Q9K12j3j54m3J56
812E5M4j28j7K18J08k38k36Q4L08ok30j31R5O9m3OOr8r8J01J01j2j25MK29J19j06j53P0J9
811A5r2r2J32N1n9n3N9Q4k8n5N6Oj04q2J43K35J1j56m2O5O6J7J7m9m8k8k7N2o1j30R4J87P4
810B58r1r2JJn5n4L3L4j34j34Q2Q2n0m9J08J07j28j29R3K05M0j84qK17Q6j38k57l2J08J07
808B7k6k4O7O8n2n2M1M1o5o4j0rJ5J4J4J5k3k4k3k3R7R7j07j09N6N7%JO9P0k2j33j59O5J00
807a1J00M2M1n1n2j%n7n5k6k6L8L7j0J00J66o0j83j84Q3Q3N3N4lkj03j04J02J02M9N0j20j18
806f6j3j3j3j4M0M0R4R6j17j15N2N1J7J7p6p6K3K4P8Q0j26j26M2M2J14J15j7j6oooor4r4P5
804@P4LLn3n2L9M0r0r0k0j9j9k0J59J58m7m7n2n3n3n3L7L8L8L7j8j9L8L8l9l8J8J8O7O8J2
803A03J2m8m7m7m8R4R4%Jp2p1N9O0r3r4L7L7RRPRM2M3j4j25n5J31K19L1j50j49M3M4j9j9k0
802A3j8k5k6J05J06j38j36poPQO4O2N1N1j17j18P2P1J6J6o3o4J34J36o2j73k2J65J19o8q2
801G1q1q8q8OOL9L9L9L9L2L2o1o1J0J0J0J0j1j1j1j1J00J01j42j43N4N4kkJ6J5J6J5j2j2j3
799c5j2LKN8O0K9L0o4o4j08j09J35J34M1M1r1q9OOO1O2r3r1JJJ19J20j24j22l3l2R9R8P3P3
798A85k1k1j13j12n7n7M9N0M9M9L4L4k2k2K5K5l1l1o0o1L2L2J13J13K0K0r2r1r1r1J71J71
797A99MLn6n5%Jk9k9k9k7ononk3k4P1O9j19j21Q6Q6j3j2Q1Q1k7k7k8k7J4J4m1m2l1l2K5K5
795e5L2L1k4k4r2r3P7P6j4j4RJ20L4p8p2M1M8M8l8l7r1r0P7J90J11p7q4K9rrj6R7J14Kj34
794H5j34LLLLO2O3OPn2n1n2n2P5P4j9j9n2n3M1J52J52l6j93q0J02J02j28j26J38K51j3k01
793F1j51L6J2J2J2J2l7l7l8P4K5q8KJ13J07nn4n5mnpq%%m8O5N6N8k0k0o8p0rJ02J03rj13j12
791a08N0M9m4m3N0M9m3m5P9P9Lj08o0N3O0n0n1O2J27J6m5m5j8j8p4p5J14J14n5n4oopoJ6J6
790b4J6J5J1J0J1J1j3j3j2j2k0k0k0j9P6P5K0K0p5p5j9k0L2L3k4k5K0K0Jj11o4J25J30J8m8
788C0m7n5n5K9K9L0K9o9o8J01R9j8j8L8L9q9q8M3M1r5r5J10J09k5k5O7O8q0p9J4J5j7j6p2
787a20p2J05J05k4j38p1J17K40N4r4r4J00J01j74j73J07J07l4l3K3K3p0p2O0J72N7j30q6K3
786ILj09m0m0l9m0J2J99J98J1lkn6n5n5n5J03J04k7k7l0l1K6K6m5m4k6Q6J13p4j29j31NNN
785a53NL0K9o4o4K04K03p8p7O1O1l3l3q3q2k7k7L4L4L4L3l0l0l0l1R6R5j09j10Q2Q1K5K6n4
783A8n4J0RlJ09O9j17j64K3J11J12o1o0L3L3k4k5L2L2j5j5j6j5l9l9J27J29p2p1K2K1j8j7
782F5p4p4Q6Q7ppn3n3LKJ39J40o7o6r5r4L7L6L5L5k1k1M0L9j20j22JJ14J06q1j31j9J11J11
781H2L3L4o1o0l0l1k4k4o3N0J43L1o1o1O2O3o4o3K9K8QPPPl3l3R7R8j53j52k7J61Q8r7n2O1
779@Q9k2q2q4N5N3l8l9j3j2M4M3rrrrM6M7m0l8o7M5N1n9l2Q0J27o1k24l9K31K31k8j40n3N9
778I4n4j65oJ80Q2j05j55L1J23J2q1q2L6L6L6L6M3M3j8j29j61n0J55J53k7j39K1J33k3j34
777a15j3J72J10p7q6K5M9o4o2M9O9m2K2K1L2q1JJ14Q5j03j06P9P4j13k01j5J36K4p4J12K13
776B35K7k39j25J09J10j19j20J10K21j9k43j35R1K43K0j36j35j8j9K4K4K4K5P7P8j27j29N7
775h9N6N6N6k3k4k3k2m5m5J1J1M4M3M4M4j37j38O9O8R7R8p1p1m2m4Q7Q8j2j2j2j2m1m1Q8R0
773A46r2r1JKM5M7j7j7k3j36j12J12J96Q5j19j18R8R9NOr0q9M2M0K2K2K1K2r6r5L6L5j5j5
772d3j5j5K6K5K5K5l1l2l2l2J15J15j28j27L2L2k4k4R5R3l6l7l0l1l0l1k3k2P1P1O2O3j06
771Aj05Q8Q7m3m2M8M8qqj7j8p2p4R5R4L1L2n3j65j21O6K57J46j72k85RJ95O1n2J7J30Rj79
770@j4J72J34n5j19j18l0l0Q2J96M4j44j36M9P8j09j70J6J06qp9J08K01J5j72n8R6j5j40j41
768b41J58J58J7j69q4J04R5j7KKk9l1l0l0K3K3l4l3j9j9P5J86Q4j03j84p3J02J01J6J5J23
767A88J23q7k01o3M8qj20l3Q0J27J6p8q0j21rJ94J93%j87j58K9J06ok4k5O2O1n1n2k1R1J02
766I6J02r7k08m2J45J16p0k7Q6R5r3j65n4J15J13ONNOl7l6j18j18o1J26J46L5r8J4J36K5q7
765F1q7J11J12r7r6l9m1O4O3j03j05O6O7O5O7q0p8J4J4j0j0J8J8L9M0j7j7J4J4J3J4m0l9j2
763Cj0J7J8jj12j29N9J10lj27j4J95J97j11j09n4n5O0N9o5o5LJ16J36n0j88p7J94J92p0k57
762a38j43J20J59k9p5p6M8M8K0K0k3k4k3k3O2O3L3L4m1m0N2N3QQk0j9J4J5p9p8L7L7R4R3j22
761F5j21RJ20J24o3j45l3N3N4o9p0J3J3J3J3J01J01o7o7j0j0n8n9J0J21P3l9r9J3P2P3r3r2
760e4%%M3M2j4j4j04j05l7P6J70J72L5p6p5p3J2J2j1j2j3j2P2P3k0k1J3J4j05j07oJ81O2j25
758gj61K7J48L6o4M7R7j6j28j29P0P0klllqpqpM2M1qpmJ09O0n3j55m4N4N4l9m1l3l3J7J28
757C7P9l2q0L3L3p8r1K2J07mj09j11Q9Q8L5L5k1j32j10P7K08K1j61n1J56J56j08j06K3K4J1
756D0J0J1J1r4r6J73J73J7j71j84p2Q0Q0Q6Q7o8o7o0o1o7M5J08nr5J7J78O7j52j53N2J62N3
755A05n9J0J1%JN6N7j27j26k1R1J4J5K2K2L3L4J0j02j89p8K02K00n9j70j9J67N4j34p7J09
753E2O0j26q0J81J22j42k29L2K48O2k35j24J48J48n6j67K2J34j9k06o8J95J89p3j45l4Q7k4
752d8j04J0J03j0j54m1K00K00j2j25o7M5mmLLn5n4J07J07%j10o8J20J25J2j56j56J0RJ03J02
751I1m0l9J6J6k9k9K6K7l5l3N9N9o2o1L1L1K1K1K1K1j19j20J0J1j%jjN9N8KLN1N0j17j18j0
750a31j0Q3Q3k1k0k1k1j9k0P4P3k8k6K7K8q0q1Q8Q6O5O4l0k9r6r4J41J41m3j56p3J12Lj09
748d0m9O4Q6k6k5Q7jj13j06OP2P2j4j3j9j8j9j9N3N2m0m1L1K9k4k6P2P3j20j22o8J20J33K1
747F8k6k7K3K2mmmmr6r6J09J09L2L3r9r8L3L1Q2Q2o1j73n8J28J54l2j84p3J36J38Qj04l9P3
746G9j6j28n2J35J40m7j11P5J96Qj80j80N2N1k2k3J00J01l3j45n8N4L3p8p8L4P7l5q5K8R7
745a1R7k7k7O4O4j35j33%J11O3m9m7O3J07q1j75o3O8O7jjN4N6J9K0o6o6l7P4L0q1p9J08J20
743A06J0r7J6P1m0k09r6J82J81k4j34K1K1o4o6K9J40J16p2r0r0J9J8J9J8l0l1J00J00ppN6
742A66n7j77j78O3J76lj15k1R1M2p0o3M9l5l5K8J40P8j08o8M6P7l4q3K8J18J18o7j79r5J8
741a50N9O0llN2N4q0q2l9P3R3j9o0o1M1M1j6j5O9P0m2m2j6j8j8j7O3O2K1r1o3M9L3L5j0j1
740A9Qj04j30N7J99K00m3j55K1K0q8q8K9J40L8p4o0o0j4j3j4j3P8P8Q6k7p7p6R5R6l5j48q4
738a39J02J11%j00J1P8P9k6k6r5r5m6O6R1R2M3M3q4q5m2O9M6o7j01j02PJ20J04J05K1r2r8
737a0J2N1o0j11KJ22J24J3r9p1M0K6K7l2l1K5K5LMMMK3K3q9q9m6m6O7O6K3K3l1l3m0m0J6J7
736h8K6K6K6K5nonnO9P0m3m2jkn7n7O2O2n0m9N5N6j%j6j7j6j6p7p8L2J44J55p0j11JJ15J15
734B27k01k00j3K11J14j12j15J08L8p3j10KJ19J18RJ0j01k13j48P6J94Q0J4J3OPm8m7m7m8
733a30J8J8J8J8J2J2J1J2P4P5K8j96j28R7R6j26j26J00K72M8j90j88O0N9poP0m0j50P5K54
732A40L1j81j81J41J41n3n3P6P7j33j33J47J48l8l7l7l8%%%Jj16j17J24K37M3j81j10KM4M4
731a2N1N1j0rM6M7j79j79m0J86J08j16o0J64J55o9o0o1k4k5k5k5QPQPJ11J12r3k03o4J60J67
729A34n7k08J7J82P0j00r8O0O2j50j51R2R2L9L8R5R5m4m3m3m3k4k3k3k4ooooJ11J12n6n7o0
728b9o1L3L2m1m2m1m2L4L3J27J27l1l1l1l1n3n4J13J14m1m1m1m0j17j18J64J63k0k0lJ09K
727A23k23j00J26J79m4p2p2K5K4K5K4J2J2q1q2J3J2J2J2O8O6k6k6m9n1Q1P9QPm9m8O0O0O0
726A65O0k19k18O0J72R5j29j0J01L6p6o8M3l9l9O1O0L5L5j32j34L3L3L3L3P9P9Q0Q0j50j50
724Ij14J10Q1l1q4q5K1K1K0K1j%j%j5j4J90J92j74j73R9J00j55k67L9K63J17k56j64K11J42
723A02q1j66N9K35J1o1o2Lj09j73N2J35J35M9M8o4j77j23J01J47p6j69n6J07J06J13J14k1
722A79k1p8p7MLO0O0k7k6q2q3p7p7J27K39M3j80j88L7J38q6j36R0K06R4l5l4NOkkj8j30j94
721b62L1Q9Q8M0L8M1p0j42Q3J07mj21rR1R1p1o9J00J01j05j05p4p3J55J55J1k14j65O0K32
720B9J21j21j20%%%%J11J12k0j9m2m2j34j36J18J17pqK4J35Q2j44j88L5J00J01j58j59j9K07
719b5J42q1r7J4P4P4k0j9Kj10j74N1J65J64k7k8qro4o4l3l3O1O0rqqrN9O1MMl0l1K6K6n6n5
717a1L7L7o9p1J7J6K0r3n2J34O4j21j65R8K59P4j24j23Q4Q5j57j59J62J60q2q2J3J3J4J3R7
716H8R9p0p0l6l5N7N8R5R6P0j18j40j38J7J8kjN4N5qrj01j02R4R2l8l6k7k7k7k7J06J04k6
715F5j37r6R1J47m0j37k6J42J43j03j01O5J79P5j13j56m5j5j4qpJ16J18n1n0q1q1N0N0l7l7
713i4N7N6l7l8J8J8J0J0RJ0Q3Q3q6q6k2k3k3k3p3p3J70J69p5p3j9j8R5R5p3p2QPJ01J01j30
712F2j28j8j7k9k9K7K7K7K6J24J25K9j97j46P8Q5k6k6Q5J00j24j81M4J59M6o3o2J01J01q5
711A15q6r5r7J6J6J20J19o8o6m4m4J2J3J32J33j23j21j8R4N9j64j68N7J04J04k9k9Q3Q4l5
710G4l5K1K2p6p5L6L5K6K6K6K5o7o6M5M5k5k5k4k5N4N5n7n7l4l4P9P7k5k4k5k5K2K2K1K2L0
708F4K9j56j58J03J04rrLLN8N9j0j0j1j0p0p2J15J16rj0rj0q2q1k6k6l4l4O7O7J67j9j01j01
707a02J9J9K0J9K1K0l4l5J46J46K2r0k3k3l0k9m8m6N7N8O6m6m0l9J6J6r6r7L3L2p3p4J10K21
706A16J52l6j41j39L5L4j4j3j4j4O1O2n0n0m2m2J4J4k6k6q9K4J63J62q6q5j5R6R7j6J3J2l7
705A20j48j80o8J25J24rrM0L9j8j29j23O4K24J13j39j37nJ82J34n4j11LL9M0j22j22j30j8
703b75Q8Q9L8L9P1P2m5j56n6N7N6n5n1O3J66N5j82j84JJ14J35K4j8j8l2l3l4l3Q3Q2m2m0l2
702e3P9Q8k5q9K2M6M6o2o2L0L1n7n7J40J42k7j40j6R8pj18p1J15J46m1j19oR9J00l0j42n8
701BN4Lj08j47M1J96Q5r3r2l2Q1l1l0L2L3P5P5M8M7j30j29JJl0l0N7N6mj16l9J47R7r1j79
700a50QJ91Q0j20j18j7R6L9p1n1n0J04J03Q2l1r1r1LJ14J15Kj23j22l1Q1J22J1q6q8J04J04
698A19Pj07q4K7J13Kj06j08R2R1j5j4j4j3por2r3NJ18J73O2n4n3mmr2r4P6P5M7M7q4q3m7m7
697a67J52J51l4j46j24J01O0n2j7R5Q3k9j53m1Q4Q3llj38j39O5J77J23j03j24j3Q3Q2m1m0
696b8K0J9l5l7N3N2p0p1L0J41Q2j43j71n8P0P0j8j8L9L9J9J7l6l8P3P3P3P3j61j60QPN1M9
695A4N0N1p7p6j05j04J51J50K1K0j04j05J01J00j4j3m1m0r8r7J08J08OOk2k2j0j0j9K04J94
693C27l1k36j21Q9R1j09j08rrJ21J22m0m0J6J6j7j7m5m4M2M1j4j4P7P8j7j6o0o0n9o0L0K9
692d7k7k7L4L4Q9R0l1l2l1l1j%jjj6j5L9M1M9N0q2q1%%J%q3q4J59J59j0j0j0j0llllkkj33
691c4j33O1O2O0O1n2n1MMj09j10J34J33k5k5L0L1%J%%k1k1k1k1KKKKj4j4j4j4k5k5O9P0M0
689C9M1M1M1q4q2q3q3O7O7J0J1rrj0rkkklJ25J25m3m3j4j3j4j4m9n0M3M3KKr1r1Q4Q3j0rP
688A2Pq6q6J10J09n9n7M5M5m7m9K6K6k4k4j7R4R5j7j8j7M6o7j20qQ9Q9j00j01m0P2P2m0r0
686a30K3J05J03q7q6qJ04M8o4K6K5J8J8j8j7j7j8K5K5l1l2j8j8o8o8J0J23P3l9p6L6L4p5r0
685a64K3Q3Q3MLK2q9p9J09J64k2k29j18J94J93m8j59k9Q3L3L2j6j7j53j55Q9Q9m0m0N8J70
684G4M7o6N3N4q9k01q2J05Q9k4j9R2M0p3p2M0L2p7j14P3K11K12r5k08r3R3J42m4j77j77J30
683a24J28RRRRr8r9K9J41J10j14j00J2L4L4J20J21P8j46j39k6l6l6K7K8L5L7n6n7M2M1q8q8
681a54M8M8M8M7p9q0N2N1K5K5K6K6j56j56m7J79J69N8MMp2p1J9J31P9j45j31k0K5K5K4K4n2
680b6j67l7J88J80m4l7P6O2j64k56l2K62J51r0r0J19J19q5j96q1J44J42q1p2L9Q2l1j07j07
679a39N4N4p7p7R1R2N6N7l7l6r7r8O5O4J3j00j14J12J75O3k8k8MLMLKJooL0q3j75o4J20J19
678A7rj21m6O6J15Lp5p7M8M7o7o7R4R4j4j25L2J42P2j15o3J22R1r7j47L9R4j7j09j11P5P6
677c3O7O9Jj11j04Q3J50L8r3r2K1K0K1K2j8j8L9L9k6k6O0O1l4j46k3Q9P5l8K6K5l5j47l3J54
675H3O3j23j23O4R5r1j43M4J70N8m2m2J0j01j02J1R2R0L6L5R7j6q5q3QRn4N7Q9Q9l4l5q1p9
674c4n7N5K7q5nJ81J72r1k49o2J46L3r6r8M4M4n0m9J34J33LLm9m9m7m9P9P8q9r0N1N1m2m3
673a00N8N7j47j48J55J54j4j3K6K6l0k9M3M4q7q7L5L4r6r7J23J22rqn1n2n2n1J14J14K1K2
671G7M1M1r1q9L5L6k1k0k8k8K7K7mlnmL4L5k2k2RQO5O4j18j17J3J3R0R0m1m1k1k0k0k1J08
670G7J10j34j33N2N1m1m1M7M7rrK1K0l5l5RPQRm7m8M6M5jjj%MNNNqqqrl5l6N7N6K7K6l0l0
668C5m2m2l1l2j21O7J96J98p6j87l6J51O1j26j27j6J27J26M0M0j63j61M3J55L1j56j07NL4
667a14L5K2J35M5j42n3J33J57l0j82o9O3O4k3k3L8L8j67j68O1O2NNL6L6R2R2o1o1K6K6M4o8
666E4j21O6Q4j01j95O6K79J67j85j84Q9R0mnK7K6j42j42l9l9J29J29N0N0j44j44o9J18J06
665A6J06o1o1nnK4K6j05j06J40J40o6j77o0J28J27o0j22j0M6M6K9K9K9L0q6q7l1l1P1P1k2
664c7k3N4N2klm8n0POR7R7j09j08l2l1J30J29l5j46j02Q5J82P1j35j35j9k0L7L7J9J9l7l7
662h7M2M2M1M2q7q8o9J18J57M6j59j61J01J00l0l0j1j1j1j1K8K8K6K8qrqqrpqrK0J8J9J9L4
661H8L3j28j28R1K02J4j73j24O2J09lo6M4R5j8j14j16M7M6N1N3N2N2j56j56Q8J98O9j19p6
660A7L5M3o9o9M3J05po7o7P2P3n8n7K8K8K9K9m6m5m4m5jj%jL8L7L8L8r5r7P2P1p8p9Q2Q2k8
658Fj39m9J76J51p2k26kJ29J28o3o2j5j5j5j5j8j8J13J13NOn1n1J6J6J6J6j15j17J5J5J02
657b0J02k9k9r3r5J42J42q1j91J1K35J18j06j92L2Q6k5j05QQ0P8opKKn5n3J09J09r6r6O1O2
656A00l1l2r9r9O9O9J14J15r1r1n7n8kkJ47J47r6r6L9M0n4n4l5l5R4R6m3m4J3J2j8j8j8j9
655c7o2o2qJ05J73n1j18pR1k0j18j19J55J54J4k10n5J71J62o2j32k0L3L2N1N1l5l6p3L8J02
653A07j1r8J2P3P4j36j35L8J49P6l6K7K7m9j60j47M0J05J04O0O1n0m9PPm3m4m2m3j9j8M3J54
652H4M3p0o8M1N8n5j11KQ5k4j50l8P7P7j0rl2l2r5J7J34J33o5o5R8R9l3j44n6J31R0k3q9K2
651B2P2m0j24j24M2J54R8j4l7l8O4O4lj17r3r4O8O8K8K7K1K1k2j34p8L4M7M7lkPPN5N6rj20
649e0q2J06J68j9j39k8R4j7j11KJ50L9j34j34J14J14j7j7J19J19q0k66j13J12K31Pj50j50
648a32j22J03J69J71o0n9j0j0o6o6L2L2k4k4M4M3J00J00j30j29L8L9k3k3k3k3J12J12r3r3
647a5K2K2K3K2l6l6l5l7l6l6J19J17J04j21j20qJ24J3j23j23R6R5Nj07k5J98J43q2k18j07
646a62K2K3l0k9J02J01q0q1N1N0JJJ8J29O9j55k09r7J10K20R8j5j29j28O7J79J48p8j45l3
645A8K7q4r9J25K18pk21k22Q1Q0Q1Q0k3k2k3k1Q5Q5q3q3noooN7N9KKj0j1o7o6K5K4o9p0M1
644a14M1M1M0m3m4m4m4P0P0O8P0j20j21J23J21p0p0K3K2L2L1k4k5j9j8j8j9Q4Q6m6m6KJr2
642e2r2P6P5P6P6o9o9o8o9P7P7K1K1o4o4L0K8K4K4l2l1N8N9j09j09O2O1o9p0L0L0J23J24p1
641A14p1p0p0mmmmN5N6M7M9k7j38o1J26J47l8j65j65O3O3O3O3P0P1j36j34kkQ5Q3K3q9j39
640a45M8J68N7p5p3poo3o3J27J26p9p9k5k6L0L0Q2Q3j85j87kJ85J42L0m7m6m7m7O0J72R1r7
638A32k26j15J56J54J2j75n6J31J50l7q4K8J03rj08j07K5K5K3K5O2O3j06j06R4R4j12j12R6
637B0R7p2p1K7K7K8K8n7n6j%onnoJ12J12J9J9j30j29l7l6j7j7KJ14J18o9j99j2K44J33j84
636ij86J14J13j7j6K3K4l3l1P6P6j7j7J5J5J5J5o9p0o8o9J17J18j56j56R3K05J6j70l3J53
635G1R3r4m7O5Rj03j09P8R1k0o9M2O6O7o6o5rrP8P8j5j5n8n8j21rJ59J60l5k21q1J05N8n2
634c6l0Q1P6l7o8p0J8J7Q8Q9L3j55j77o5J33J33j0j21m4J42J45m2q8K4R4j9j79o7J36J38j62
632b3j62L5K22L8k23j27J35R3r4j28J34K48O2j50j48J2J24L2q0q0L2Q8k4m6m6Q4Q6q4q2Q0
631HQ1m3m4J6J27k4k11n0J38Q1j05j13P5J25o1j17oQ3k9j6R7J84P1j56j55r6J8N8N8n9n9l5
630a59P7Q3k7l3P9Q0l3r5J6P2l9k10r8J43J43K7q4q5K7R7R5k7k8j4j4M1M2PPn0m8k0k0P3P5
629A00j7j6j6j6n5n6P5P5j00j00m4m5N1N1N0N1k9k9K7K8L5L6L6L6r3r2JJJ1J2J1J2%jN5N6
627A01o0n9n3n3M5J55Q0j08j68J9J45J46r1r2l3l5k7k7J04J03l7l6N7N7p2p1K1K2K5K5K6K5
626A34p5p4M8M9m5j57m2J45P8j08j05Q4J44L3r9r7K0K1P5P7k5k5k6k5K4K4o9p0OPO2O2Q0Q0
625B11j63j63N1N1N0N1l7l7K0J9n3n3P0P1L7p5q1L0M2o9j56m3P9Q0qpP5P3q5q7M4J55P4j13
623E3j96q5J47J46O8j19j33k1j0j1K0J33N7n2n4N8J25J4q6q4N7N7KJj2j1q1L0R9j3j37k5J24
622F1J25l6l7n0n0m9n1O6O5k8k7M4M4m9m8j9j9O7O8M3o9j62n1P6P7q6q6J11J10M2o9k6k6l4
621g3l3L9M0j6j7L0K9K8K9J%o9M1Q7k5j23j24P4P3j91j91O2L24K30l2j07j05k9k9R6R6K8q4
620E9p2p4p4p4R5K07P6l6j3j3j2j3n1O1J2j00r5J7P8P7J2J1J1J2m5m5n8N2J14Jj27j29O3J74
618A01O0j27o4J21J60j02k34j22J47J46m9j60m6J42J18o8j49L8J28J29o5o6l7l6j56m4J50
617h5J50N2o1J7J6m7m6M6M7j09j10O1K47J17p0j31j30j2j1L9L9j6j5J10J12n8j69r8Q9M6o4
616d4k9Q4P7l5j43j44Q6Q5M8o4p1M1J46L6r3r4K5J36Q1l2p4p3n8N4J19Qj20j22N2J63L3p8
615@k9k9l6l7R5R4mj15qJ03R7j5j0j1p4p2P6P8o4k49j52J12K02Q9k5k3l2l2N8N8J6r5q7K5
614i6l7l8P0J82J19o8j98q7R3R3J35K3r4r4k0R0j0j21j2J74J15j48k55PJ75O2q6K5J30J8j49
612bj49R9R8J1j00m6O8K7K9p6p6p6p5J12J12R0R1k1k2o1o0o2o1N7N7N6N7n4n4o1N0Q9R0r1
611D6r0k2k2k1k2Q8Q8M6o6j5R7J40m8j34k2J5J6j0j1j0j0q0q0J00R8jj14j14kM9M9jjN7N6
610D9m9m8J8J29K5q8q7K4R3j29j75N0K34J22q2q1K4K3j6j6j6j5noJ06J07j20j18ppK2K1P7
609E9P7l4l3l4l4j31j32j0K14J67n7j66n5J14J13o6o6m3m3O9P0Q0Q1l2l1q9r0r1r0J21J22
607d0QRm5m6O8O6M6M7o6o5M5M7J1j00r9J25J33r2j36Q8J93l1k77j65J69J69m6m5O5O6j6j6
606G0j6j6N7N8JKj00r9J3J2lmN2N2j94j94n9J66N5N5O9O7ONNNPPk7j40j37Q7J40J41j29j27
605a13N8N8L9L9L9L9j35j34o8J55K34J0j32j30M1M2J3J4KJKKRRm7m7m7m8M5M6P9Q1q8q7J2
603gJ0m4m4P6P5j8j8J3J3J2J3q1q2Q5Q7q2q1J3J2k3k3P1P0N0N0m3m4l6l6J9K0k5k5R1R2N4
602B14j71j42Q1M7M8p0o8K3K4l3l2J2J2J3J2K6K4o8o8noJ62J64r5r4j41Q4J93l0j33j34J31
601b0J30%%k4k4q0q0J6J5p8p8R8R8l3l3K1K1M9M8mnK4K4m9m9OPj4j4j3j4L9L8M6o7r2r4O8
599a17O8NOk3k3O7O5n7n7kJ10K5q7o0N2Q0l2r7J4K06R4j82k93qK53K12n0j56m3J06J06j24
598E8j23k2Q9O2n0n3n4nnP9P8n2n1M3M3j3j3K1K2K1K1j2j2Kj09j72o0J13J14P1P1J6J5l4l4
597F5q9r0M6M5m1m1k2R0J46L4m6m7M1M0l9l9n3N9O3n0p2p3P4P5n6n6K1J9L5p7j16lN7N8K3
596a9K1mon5n5P6P5k3k1k3k2lkN3N3MLn2n2O6O7j19j21R3R1k1j9K3K5l2l1k4k3L3L3kkkkL5
594A6L6L6L7r5r5J8J7Q0Q0l2l2p8p9L4L3m8m9O4O3J9J8l8l7K9K8oj18j06J19J60M9p8p7K8
593dK7p5p5L7L7R7R8j4j5m5m5m4m5L0K9J40J42j83j82Q0P8m0l9J5J5r6r8Q2Q3K3q7n3J71J30
591A74r5j29j8Q2Q4r7r6P4P3P4P4j24j24O2O3L9L8p4p4j2j3M3M3q2q3K7J38J00j25j80M3J78
590H3O6m5m4L0L1q3q1L6L5p6p6L6L5R1R2m3m2m3m2Q0Q2l1l1nmmmJ5J6m1m0O1O1n1n2n5n6N6
589d3N5J%%%lmlll3l3P8P8l4l4l3l4J03J04q4q2M3M5o8o7k3k4k3k3R6R6j6j6N6N6J8r5r3R2
587E0J00j3j09j07P1P1N1N0ooj36j35N2N2O4O5m8m7l2l2q1q2J12K24Q6j01j08MN6n7r9J3J17
586C9Nj30j32M9M9M8M9M8M9r6r6R1R0onool2l2l3l2PPq6q6R4R4L3q0l0Q1Q1l0q6K7J12Jj53
585a03j55Q7J98P7l5K8K8k0j32j33k1L8L8R5R3k4j35m9O3lj15k1R1J25J3j0j1POm9n0O8O7
583E6k6k6j2j3j2j3O0O1MNo8o7o8o8L6L6n1n1Q2J94P6j12m2O9O9m3j25O1J43L1j09j08N1N2
582G2j03j05J69J69m2j56k9Q0l4j46j5R6O7m4m6O7M8o3n7N6l8l8qJ04J9r2m7J41J21o5j54
581g3L3P8l3j51m0J05J05J1J2K5q7r5J7Q6k6q2L0J98Q6j18j16oJ06M3M4J2J1j12j11K4J36
580A12M3o9j19j19M2M2M4M2L7L7J3r9r8J3J32J33j04j02rrrrRJ0RRL8L8m8m7j4R7R9j4o7o6
578cJ9K0L7L7j9j9r1r2l1Q2J04pj05j06J45J44j9k06p7J10J86P5r8r8J8J9L9p1j29j7J46J44
577A37N9j29j66n5J40J39j0j96p8J10K11K4j02j01OOn0n1J23J24j14j12k0R2K8K8N3N3m1j52
576d4p7J10J96Rj67j67L2J42P2m1r4r5O4J76J16j10j73o3J05J03j09j10N8K83J55k20k22L
575f8K03R1l8l7L2L3j36j35%%r4r3J83J82r9r7N9N7p1p3j%j%J1J2M0M0J1J2m3m4J12J13j25
573C6j23P8J89K3k01l4J89R7j29k00K4Q3k7q4K8Q3k8j58m6Q9R0J5J4M4M3ooo3o1j3j3Q0Q1
572I4J4J5J4J4n5n5KJK8K8n8n7N1J65J05j21j36k4jjl5P6J68n7k02k03O4O4P1P0o0o0OPOP
571e5rrM8M6n1n2P9P8o5o5l4P7kkn1n1N5N5kjJ7J9J9J8L6L6k5j36j36k4P5P5K3K2o9p1m7m7
569b26Q4Q4R5R6m1j51l4P8P8l4p6L5O3m9r9J2J36K4j07j08N4N4L0K9j9j8n2O0J64k2j69n7
568h6J78J80j16k27M2J53k0k06q0J07P2j16o4J98J93Pj79o6K0J9k8l0Q0Q1n0n1n0n2M3M2K1
567A5K2oo%Jn4n5N3N2mlK7K7K7K7p7p6N4N4mmJ6J7J3r8m9O2J53M0j96j96mJ83O6j21k13J2
566b45Q0Q0J9K0rrJ8J8J10J12j92j90j49P5J43J42K6K5m0l9N3N4n5n5L8L8o6o6K6K7M4M5m9
564B9m7o4o4O7O7klklMMMMrql7l7m8m8Q4Q3J0RRRL4L4n9n9Q3Q4m7m8k2k2k3k2OOO1O2j6j5
563D8m4m3j3j3M3M2j6j6P7P7o6o5r3r3O8O9k5k5NOO1O1j44j45J37J36j2j2M4M4p0p0N8J71
561A82Kk22r9J26Q8j36j78M6J39J38K2K2q2q0k6k5K1K2oom8m9M5J57R1r7j25O3P9l3r7Q8J22
560A44J0j47l4K4K3o7M5J55M3j31j29J15J16J0j02m1l9j9k0KKk6k7NOO1O1L3L4k3k3j6j5n7
559b7N4O1n1j37k6P5P4p5L8K07K08r8k87j30N7nmK5K5l1l1J6J5j3j2R3R5l7j48p3J14J13p3
558A2j64n4P8P9M8M7qqL4L4j34j34k4k3O3O3J49L8o8o7M9N1p9q0J32J32l5j48J8K07J22j41
556A89j53L4P0m3q0p9j2j24n5J32J81or8j00K1K0k3k3P0P1K1K2K1K2n7n5J11J12r9r8nJ06
555I3N9j28j27N9J90P8j27j27J21J22nj92j53L3J0J0L6L6R1R1j35j34m2m2J32J31p5p3r1r0
554b49J79J77O0j28j79o7J16J15L0K9LLKLn4n4j10j10J10J10J5J6k2k2k3k2j1j1j0j1J12J10
553A07J8J8q8q8M2M2o0o1nmP6P5j8j8m3m4m4m4P1O9P1P1o8o7j0j2llJ27J28j00j00opq0q1
551a39J18J16J5r8n7J28J06q2j58m6J39J41k1j33j18O8J49L8p6p5M9M9q2q0k5k5L0K9L0K8
550A8L3L3L3L4l8l7l7l8N7N6j48j50R6R5l4l6P2P3j5j4k1R1M7j40r1K1P2l9r0K3J09lj17j19
549b04J18J17j2j2j0j2j1j0Q2Q3k6k6q1q1M2M2j4j4N4N4l9l9j3j3j3j4J2J3J2J2m7m6J0J0
548g6J34J36p0p1n7n9lkQ3Q4j0rj6j5j6j5l0l1R2R4o5j76r5R2Q3l0j12%M0M1rrJ28J30j14
546D7j14K7K6K5K6J49J49m3j56j48l6OOL1L0q0q1P4P4L2p9l8P4J9r3l4P9P8l4k3Q7j9j31j19
545a89O9Q3l0l1Q1Q1l1n8N4R7r1j39k8Q5k8j09P8J89Lj05PJ81P0j88j87J36J35m3j53K5J38
544A02n9j70p3J90J96J0j23j23p2M1Q8R0m9m8N6N6l2j44m0P3Oj07K9K16J58j05j69J6N5n8
543A0n2N9R0k3j27j5P2P3j07j07l0l0P5P5M8o3j13P5J67N6j32j31J13J11p4p4P9Q0j01j00
542i6J0J20J7r5n9N4M7o6L1L1K3K4l9l8l3l2O9J81P2j54k11J3J97Q6r9r7PQp8p7J11J09l9
540cl9P1P3N4N4n8n8N8N8n4n4m2m3m1m3o6o7M6M6O3O1OPono1o2O3O1m9n0L2L2L1L3p3p3L9
539e9L9r1r1J57J57K0k03j56P0J76O5j19j21M9M8pqp0p0J78J77J39q7j47j46M7M8rqj5j4j4
538f5j5NOJ16J18p2p2k2k2L4p5r1J34J45L3j40k6R2R4j62j62J22J20J2j02k6J97J7k07k06
536b20J8J35K3l6P6K04J8j08j08Q6Q7o4o4pqLMLMK2K1N0N0j15j15J5J6l7l7Q7Q7k6j39j5R7
535GL3p9n1O1R8j4M5M5j9k05j67R6J94Qj76o5K08K09p1j81j32j8M2J53J31n6j75o4J87J87
534B31q7j99n7J29P9j08j15P1Q0l0r7J6J13J14n2n2MMj24j24KJ89J18o8j45l3O0O0LLR0k3
533E2j20j20Q9K00P5j12r3r4pJ06R1k0j05NR9J00j31j29L3J44K1r0k4Q8%j12n5J31J39K7q6
532A02q5L1L2Q4k9j27j26pJ06P6l5%%l0j44m8O4K2K1M4M4K0r1m1P1P1m0p4L8K4K4J5J5o5o6
530a04k4J62M8j38j80Q4K72Q6j17j16l5l5k8k8O5O6p4p4J32J31K8K9k7k8m5m6J1J1p3p4N1
529g0N0M9o3j19pJ03J02n8j71p7J11K29J18L4L3l5j47j10KL1L3o8M3J07nq2L1R2R2j33j32
528a7L5J48K6j62j68n7R3R4OOl3l3K2K2opppN5N6L2q0o4M6R7j6j57j58P9P8k5k6J05J05jj
527H0jjm1m0J13J14Ok19j55m3N6N7PPL3L3o0o0p2p2J95J94m3k66p6J49K20mj07j06j1j1j0
525a34j1J51J52r2r0N6N7l6l7L4L4k1j31PK32K30j44l63j39J05J05L4L2L4L3n1n0n1n1k3k4
524a52J68J68j6k41j85L9N2N1O6O5J14J13r2r3N0N0m5m4p6p7R1R2o7o6O4O4n2n2MLo3o3L1
523i9L0l0l0K5K6P6P5n6n4K2K0K2K2l3l2l4l3M5M4j0j1j2j2j3j2N8N7p2p3L8L8L8L8r2r3P6
521e1P4j0j0j0j0j3j3j2j3R6R6j02j01K5J37N6j32j46l4R6R6L6L6k0k1J5J5m1m0J6J7P4P3
520A79j44j44J00R8j9j9j9j9R3R4j13j12Q5Q5mj90j15P3M9M7L8L7j9j9o6o8J00J01o7o7O3
519C8O3n7n6j%LMMLK0K0K0J9k1k1k1k0l0k9O3O5k2k3p7p9O6O6O5O6o6o5K6K7p1p2N9N8rrP8
517H4P8l7j47j05Q4J46L6n9n8j6j4j5j5K8K7K9K8r8j00n0O3N5N6J9r1j27j4J71J69l1j44l9
516h7P4L9p2j6R5O4m8n2N9J13p5j45l2J23J1j04j05M2M2L5L5P7l6q3q4P6P6K8q4OPjjrrrr
515e9q8q8J00K11O4j23j79QJ69N8j21j22L1J42L8p3r1K1O4O3J8J8q7q7l5P8P0P0L9L8lj17
514B7p5L6Q5k7r4r5Q6Q4kkkkJ1J2J2J1o7o8M5M3q9r0k0J68J67k0r0q9O2O3m9m9jjkjL7L8j9
512C3j8m9n0O2O2K3K3K3K4RRj03j03K6K5K5K6poN1N0q1p9L1L2P5P5l7l7j01j00Q0P8k0j32
511h1JJ88Q5j02j57K9J79pj47l5J79O7j87j87j8J69J19o7m4O7N6n7p3p4L1L2M2M3o8o9k2k2
510a30R0Q9n7n9J21J23o1j72l5J51P2m0p8p7MMn2n3P1P0J4J3r3r4J8J9P6P5l5l7J17J18o9
508A03o9J5J4k3j34q6J01J64N2q5q4K0J9k0k1L5L5m0m2m2m1J14J13p3p3j0j0j0j0k5k5Q7Q6
507C5q0q1M8J59J45q0j41k8L3L4j6j5J9K0p3p4o7o7K7K7J11J11J7J8r2r2JJP4P3n7n7N9N7
506D9p2p2R5R6M0M0j28j27l4l4R2R0j14j15Q5Q4Q4Q4o5o6o4o6J27J27K4j99q0J44J94l0k00
505a1q9P9P7k1k0j9k1J5J4J5J5l4l5l5l6N8N8KJONONKKKKj5j4J16J17j64j64NMQQPQm8m8M5
503i2M5O7O7J2J1L0L1k6k6n8n7kjJ3J3J2J3RJ0q4q4j0j0Q4Q2L9L8j56j56l0J58J57l0j02j02
502a35J7J7L4L5L3L4k9k7k9k9N2N1L3p9n2J34J84lj70j69K5K4j5j6P9P7l6l6K1K0l1l0K4K5
500C3j4j4Q0Q0q2q1k5k5K8K6RJ22N5j33j32N5R2j9j38k7J06J05n5n5J04J05j02j00j3j2Oj06
499a27q1J06J50L8l4l4J5J4m4m4M8M9j4j4j4j4M2M1L5L4k5j37j79PJ09J09q5q5O4O3o0o1P0
498e8J82L1j56j45M2J26J4o4M6J34K1j14j12o5o4J8J7K04K05j20j20ppj5j5j6j6o1o1N1N1
497g4J0J1m6m6J58J59Q5j04j38k4J1J1N1N0J07q0k34j21J40J40q4q6J02J02j4j4j4j4p5p6
496a07L6J48Q8j01j13kN7n3n5N8J07om7m7L0K9L0L0ppj18j20P9P8K2K2J3J2J3J3j00j01J1
494a08J2J9K0J9K0j3j2M3M4p4p6L7L7J2J2m4m4M0M0Q3Q5P8j10j80o7R1R0j5j4n2n3N9N8LK
493D2n3n4mlmlJ78J79q3q3j10j08MLJ14J15KLo8o7j31j9J36J35L0L1n7n6o9M1K8q4j34k1J44
492b6J44j10j10O2O0j19j19O9J81M4j43n2O1J11%l6P6O9m4r2r1J3J4M5M6Mj08j34k2R5R5L9
490B2M1M0M0l6l5J4J4K4q8k00q8R3R4j2j2L7L7L7L7J7J6q8q8l0Q2J9J8L7L6oj17j02J0J28
489iJ26K3K3r0q9l2l2K4K4J9J9J9K0r2r3Q8Q6K5q8l9P2R6j7o0n8K1K0J4J4P8l5j47l5J15J15
488A25j31j33L9J51M7o6k0R3l4j45r5R3K12R9o7o7p4p3M9N0j1j23l2Q1Q0l2q2L1N2N4l0l0
487A1K6K6o7o7j2j1R1Q9m1m0pqOj06l3Q0P0j16j48M1J55M2l4l3R0R0j24j25J1J24N6n5O2O4
485A07jj12j69n7P6P6Q3Q3o1o0p4L7J52M1q8q8O1J74M3p0p9p8PPl1l2q1q2O5J76O2j25j11
484a49P6K28J16j41j40m2O9j3j2ooOOn0n1J06J05M4o8j30j9P8P9r7r9jJ12J14Jn9n8j4j3j4
483d2j3K7K7l0k9L0L0L0L1m6m5m6m5M1M1j6j5k8k7J04J02l9l9J7J7q3q4J15J15k8j39r5R1
481g1J41L0J0J1MLr0q9q2q1Q7Q8L1L0o2o2J07J08k3k3o1o0L4L2M0M0n4n2M4M4j1j2n1n0P9
480B9Q0k5k6k5k5J1J2J1J2p2p3K1K1o3o2J06K18P2j15j14P1R7j6o7M5J6r6j45l3O2O3o2o2
479a34N9O0MMN1N2p9p8J07J07r9r8j4j4j4j5NMR7R9QRQRn8n9j43j45O0J72J58k9j87j88O2
477b19J75J46m0j15j15O2O3n0n0M9N0M9M9o5o7J20J21l2l2q9q8P7P5l6l6K6K6q6q7L8L9L8
476dL8MNO1O1j19j17ooM5M4M6M5p4p3L8L8j20j21J41K53M8j40q9K1p1p2OJ92J08p8j86JJ31
475E0K0q0L0J02J01p9p8o2o0N1N0N4N3j34j33L5L4L5L4J%n4n6P6P6l7l5O5O6m7m7k3k2Q9R0
474A65j55j55L3L2L0L1k6k6J0J0J1J0L2L3p8p9qqM8M9P0P2m1m0n9o0llO8O7m3m4M2M1j3j3
472@P8P9j09j07popoK3K2K3K2m9n0m3m3Q4J95J33n4r6J7O9m4r0K3J28J6j18j17j2j3J7J6P2
471D6P3n6n6%JL1L2p9q1M0M0L9M0j43j45k5k5J09K20J57k9j44l2Q1Q1r5r3J6J8L9L9p3p3L7
470a0L6L7L7J0J0j02j01m5m4J43J41k9k9q5q6O1O0n0n2n1n0J37J36m5m3m5m4M7M6rrN3N3n8
468B0n8M1M1j4j5m6m8O5O4o3o5K9L0k0k0L6L5J1J1J1J0n8o0L4J46Oj80j32k0J07J06N7N8k8
467I1k7k8k8k3k4nJ06J28n9k16j03J41J40k1k1j0j1j0j1o6o8K6K6Q7Q8m3m3M8M9q3q2J1J1
466c0O6O7n5n4KJRJ0m5m7J%n5n6R6R6KLjjjjL7L8n7n5R4R5p4p4J%N7N7JKr2r1M9M7M9M9n8
464H2n8jkJ8J8l9l7J4J3J5J4j10j11R1K02J01j61k42n6J25J25l1l2O3O5l0k9R0R0j43j41k5
463a22J61J14p5o4M8O6O7o1o1o1o0R3R3l7j49j44M4O2O2N2N2o6o6j1J76R4r2j91mJ16No6M4
462A9J31J9j59j58LLJ20J18m8m8o7o6O5O5jjR2R3j32j31l9l8P4P4P4P4o1o2o0o1l6l5N8N8
460f3m5m5J61J61j23j23l0k9L1L0L1L1n5n5L9L9k6k5L0J42R2r6p6p7m0l9N4N4R1R2m0m0mm
459D3r7r9P1P1J3J4j00j01L0L0N8N9KKO0O0j07j07J57J58mj91q0J42J32r3j29j29M4M4j9j8
458h4R3R4OOn0n0j03j04Q3Q4N6N8JJn3n3n4n4J05J03qqKJKJq3q4J03J03j08j07n2n1N3N4J09
456A2J10j17j17P1O9P3P2J7J6j17j16p0J53K04k1j43j42j5j5p1p1J23J22O7O7j43j43M5M4
455c6o5o5M8M7R5R6j6j6J2J3m3m4M6M6j41j42P7P7P7P7m7m8m7m6j3j2j2j2Q9Q7k4k4j5j6j5
454a2j5J%n5n6J04J03rqk7k6L0L0j0rn8n9k8Q5R1k1j43l1Q6Q5p5p7M1J53P8l4p7p5j25j25
453b68J5K03J85p6j40M6K19J08j47j47k8Q4K8q3kkn8n9j7R6M5o6o3M9M9o3l7P6P5l5j04RN9
451d9N7l2P8P9l3j16j18O3O3j9j9R2R3m5m4O0O1m8j58n5N9Q0l1p2p4O1O0MLK1K2L5p7j96q4
450b79J08J08L4L3L4L4j07j08J43J42K9j59j08P9N9n0J5J6K6q6r3J8J11lm4m5Q3Q1l0l0l6
449b5l8O8O8M5o8p3L6K8q5q5K7J73O2j41j43j9R3Q5Q6L1L1k6k5m6m5m4m6L8L8j9j8K7K6K8
448D4K7n3n2m6m6%J12J60k6k24j13R9K10P6l7k2k3n2n1MMm9m8PQK9K9K9K8L1L0o3o3K0K0L2
446C1p8j51l9J27J26K0r1oJ06M3o9j7R5K2j64j18J45J79qj66j68Q1Q0j3j4KKQ7Q9N3o0o7M6
445A05L5p7j25j4J01J03o0j70j11P6J96J96n4k39j59J03J62M9rqj3j24p6L7J18QRJ0M2j44
444c3j52L5K17J05j38j37ONo4M8J54M2j23j25N0J61%j11j8R3L0q0m0m0M7M6l5l5N1N1P2m1
443D1j33k2R7R6j02j03LLKLJ02J01o7o5O1O1l2l2L2L1n6n4K1J32J0j03p7L5L4p6k1R0Q4k8
441F8MLmlk9k9K8K8l9l7l1l1q0L2J00J00l4l3l3l3N3N3l3l2n9N3N3n8j06j05O1J73J36K5p4
440H7p4p4p5J9J9J14J15J7r6j16mR3R4p3p1N0N2j8j29m3O9Q6k5p3L9J02J04n8n9o7o7O3O3
439F4K4K4l2l3O8O9j19j19J02J03q5j97m9J37J37n0m3O9opo9p1j4j5J24J25J2j00j19O7J30
438A27J8q1q1R8R9j57j55j2J76J15p1j72J5J18J18j26j24L3J45Q3j05j69n8J30J29o1n9o1
436h8o0O6O6l5l5j3J72J74j4j63j63Q7J99J3j74o6J20Q7j00j58m6P0O9K2K1p0p2M1M2L6L8
435F6p4p5P5P4l7l6N5N6j31j31P3P4L5p6l6J49K01J2k30k29q4J02J07J05NOj8j8j8j7K3K5
434C3K4K4q5q6K7K6j9j9k0j9J19J20PQm1m1J5J6q0p8L3L3Q0Q1l1l1l4l3l3l3P2P4m0l9pqo2
433d7o4J21J21j39j41O3O3PPk8k8k8k7J20J21o7o5JJJJj8j8j8j7L9L9p4p3R3R2k0j8L9L9p2
431Fp2L7L7L7L7q2q3L0K9j2j3j3j2O1O0n0n1m0m1P2P1k5k7q3q3N9N8n3n4J31J29J8J8J%j11
430a4j12K1K0P7P5o2o2poM7M6qrM2M3p0o9k7k8k7k8Q1Q1Q1Q1j19j18Q7Q7jj%jrrqrj9j8p3
428d5p5jjR3R2k9k9k8k9L7L5L7L7jjn7n6kjn8n8L2L3L2L3k2k1p8p8P3P2k1k2K9K9L0K8q4q4
427a59k9Q5J64k3j78o7K13K15o0o0PPq7j98l5J53J51l5n5N8N3o0j04PO3m9m7O5O4m8m7O4O5
426I3m7j30j8J42L1j08j08J5J6M1M0J27J27j07k19o2J25Q4k7q2q4P2P1k3k2p0p1O1O1j9j9
424a10j9j9O5O5O5O5NONOq0p9J4J3NMNML3L2k4k4o7o7J00J01M5M4q7q6N3N4m0m0j9k0L7L6
423H1o1n9O9P1j3j3j3j3N6N6j12j12Q6Q7ppj22j22QRL1L0L1L1P8P9j20j19K3J34K1j66j68
422b46K1J84J84p1p0j3j5J02J03o6o6o0o2O9O9k3k3k2k3K0K0j10j11R6R6R4R6j13j11N5N7
421F1j7j6j6j6PQq5q6O4O4O3O4j06j07R9R8j61j62L4K22J27j35j74J2J03J02j7j7QRRQn1n2
419e6n2n3R2R0lkM0M0j66j66P5P4P5P4ooo1o2Q6Q7q2q1M7M7j0rk1k1P1P2m5m6m4m5j0rj0r
418a05K3K3K3K3K8K8K9K8J%r3r3P0O8r8r9J02J02o6o6j0j1M6M6Q5Q6m5m5rqr4r5R0K03M6j42
416G1p7L2N8n6J5J27J13p5j70n6L6L6j7j8J14J14p7p8k1k1L6L5n9n8R1R1lll5l6K1K1n6n6
415C9%JJ4J5m2m1m1m0J26J28m6m6j8j8o3o4R3R2K8j59j10P7J03qr7J5Q9k2j09MQ1Q1p9q0O3
414c4O2PPO3O4l5j46j05PR9R7k8j41q5K7N2N2p3p2O2O3O1O2M0M0j6j6kkn7n7K2K3M4M4K7q5
412G1j20qJ33K1k19k20J13K27L0j54p4L9K0K0Q4Q4j4j26j0J02R4j8L5L5l3j44m7O6L6p4n7
411a08N6P5l5L9M0k3j34j11P6J57M6m1m0k0k1K4K2L7p4j78o6P1P1R2R1O9m4j31j9P8P8m6m5
410a4j1j2K6J37J25o4j50j50P4P3L2p9J2J0klljn3n2k2R0N7N7k9k9J8J9J9J9m9m8n6N6K7K7
409E1k2k2N8N8p3p3J13J13q6q7l8P3J0J0%%r3r4J4J4j0j22oJ07J00j3OPn0m9j8R5J00j1n6
407FN7N6n6j11%N6n5j02J0P1P1j5j5P7P8r3r1o3N1qp%%R9J01l1l0kjq7q8N1J62Q6j01j62K5
406f1J39K7j18j20n9N4R5R5P3m0q3q1MNM8M6qqk3k3k3k3Q3Q3p9p7L4J44K2r1p8L3L3p8l1Q1
404eQ0l1r7J5P4P6n9n7n1n2m3P0O9m3k2k1M2p1o7M5J44J43k7k7k7k7l6l6l7l6O5O3M2p1k2
403c7R0K0K0k9k8p7p8n7N5O3n0o7M5J69N7l8l8M9M9m3m4J4J3k1k1L5L6JKKJq6q5QPooN1M9
402B5M6M5j0j1n4n3J0Ql2P9J73O1j72j71L3J43M1p2kkl4l3N3N4l0j42o0J26J05qj26j5L8L8
400E1m7m7R3R3mj18j23j2J2J2o2o2O9O9N5N3l9m0POPOR8R9j08j06r0q9P9P9Q0Q1j24j24Q0
399f6Q0j4j2ppqpp4p4J32J31n9n8L5L4o1o2L2L2J6J7m0l9J5J4J5J5j3j3P9Q1p3p2p3p3J42
398c5J40J1J0j25j25Q1Q0j3j2j06j07J49J48J7J8j07j06K4K5n1n2NNO0O0LLK1K0K1K1m9m7
396a3P5P6q1j92j53J10K09R8j04j03M4M3j2j3J6J4J6J5k6k5k6k5J38J39j04j04nmmmP8P9r0
395F2k02m1J46R4r2j21O6J13Jq6K6Q1l1j53m3J32J30m3m2J3J3J5J5J4J5m2m1J3J4llmlKKK
394A9Jj2j1j2j2J5J5J6J5o3o4L0J41Q9r8j42l1Q9Q8p3p2O9O8r2r3O4J75K0j67o2N0R4j7KL
392D2nmK3K3%j11j7R5Q9k3m8m8JJM0L9k1j32j02J1O7m5k3Q9Q8k3j56m5J22J21O4m8p1p2j3
391i2R9J56M3j56j55n7N5L8L9j1j1j5j5j5j6L5L4L4L4K5K5l2l1j8k0P3P4RQq5q4Q4Q5l7k23
390a23j53J10J81P0j6j7k3k4qrrj0J6J5P3P2l1l1l1l0j07j08R9R8j7j7L8L9MNO1O1j0rj03
388E6j03o9o9O2O2J8J7J48J49j16j17k2k1o9p0J00R8L8L7j30j31O2O2O1O2q1q0k5k5L9L8L8
387A9L8p6p8R2R0n1m9n1n0J0RJ0J0MMR7R7p0o8p0p0m5m6Q6Q6l3l4R8R7o9p0O2O0k3k2k3k3
386e2J4J3J4J2OONOr6r7J46J45p2p2K1K0R4R3%%j34j33k9Q4L1L3j7j7K9L0k7k7k0j9L6L6q6
384b4q7Q2Q0k6k5O0O1n4j65j26J36K34J22j10j10k6Q6jj12j40k8P1P1mllmK9K7k0k1q0L3R5
383A8j6j24j1Q6Q6q2q3J48J49oj92p4J13R7r1j30j9O2O1J1J2L1L1k6k5q5q7Q3J94O3j23k10
382a39k3R9R8k1k0K2K3p0p1O6O5M3p0l3P9P9l4n9N4N3n9j21rJ14Kj09j10J20J19O3m9J5J4
381A31n1n1P3P3k4j36j35k4M9M9%%K5K3K5K4j23j24M4M5P7P6K1K1NMn1n1j6j5j03j02N9J72
379a0J47p7j48l7J29J29o9o9j3j4J9J7l6l8PPO2O3o3o3J35J36k07l17k2L53J93j82j75N0O4
378b9m9r7J4K7q7k5K00J40q4k07J7J95Q2q4q2K4K4j08j07J77J75j03k14L4K57J65o1k03r1
377a00P4P4o7o9K4J34P3j52j39k6N5N5NOj6j6j6j6N0N1m3m3R8R7p0p0j9j9J12J12q9q7r1J33
376EJ46L3j33j32k7k7K9L0L1L2o2o2L6L7k0k0N9N8l4l5kjjjN3N2m1j52l4J54J54l4j06NQ6
374G6k5o1o2O2O1m9m7M5M6l8l7J30J31j37j36L1L1k1k1k1k1J7J7L6J48J20o7j88p3P2P3j25
373c3j26J6J7J11J09n8n7kkO3O3l0l0j2j1M4M5J9J9p5p3QJ0m6m7K0J9l7l8M5M5j1j2N4N4l9
372B2l9j6j6M0L9j9j9P3P4q8q6OOR6R7Qj79k08k0J06J06r1r2J52J51q7q6M4M3k9k9m9O4J24
370I8o2j44l2O3O3r2r2N1J62Q2j05j42k8O5O5K4K4K3K4p0p1O1N9mmN3N2j23j23J2J24M8o4
369cn8N5PPQQj1j23j16P1K24J12n7n7k0k0L5L6m8m7m7m8K8K8k8k8M4M3n0n0K7K7K7K6m0m2
368h0l4l5L3J43J45L2j56j55J0J21K1r1m0P2J04q3j26j5J10J09k0j30o1N3P4P6j09j09R2K04
367A55J15j47j60K6R4j9p3L7J09p8j60m8J35J33o4o3J05J07j00r9M5M6m8m8M7M8m6j58o9J19
366e9J18o7q3L0Q6Q6m6m6m5m6L2L1L0L2n3n2n3n3L3L3L4L3NONNLKLLJ5J4p8p9J21J22j4j25
364a7n1O1O0n1k4Q7Q1l1j22j23KJO3O2NOJ2J2m3m5QPPPO3O3QPm7m8m6m7N7N6l6l6N5N6l8j49
363a08j8J69J62k5j48j46k4Q9K7q4p8L5J58J59j08j07rJ03J8r5j07OK8K9O4O3P1m1j0rkj14
361e2o6M7J33K1JKQj03o6M7M6o5r2K0J43L2ppNj07j25O3J08oj23j24J14J13OOOOq8q8J56J55
360A19m3m4m2m4J8J9J7J9n1n2n2n2J69J67Nj83j26O2J38K6m4m3K3q8n2J34J36n3j98q8J19
359h4J18j45j47J35K46k9k16r5J68J50l6q2q3KLKLO7O7o2o4q4q5Q4Q5RJ0RJ0R1R3P4j14k25
357a25j15K04K04o8o7j9j7k3j36j6J71J17Oq3L0N3n9n8N2Q5k7j51l9J05J06j8j8m4m4M3M3
356I2o3j75r3R4J22RrrR0R1p8p7j4j3j4j4O4O6j03j04N7N7N6N7j2j1j2j1L2L2L2L2j42j40
355a11J02J02n8n7P2P3n3n3LMO2O2o9p0q0q2N0M9O4O5RRj6j6j6j6QRRQJ7J6J7J6k3k3L3L3
354A49QQj22j22J14J15n4n4K8K9K8K8n9o0P2P2j1j0o7o7PPO3O3m2m2m2m1k4k5k4k5K6K7K6
352b1K5P3P3k0k1P5P5j9j9j9j9j8j9MMNMk5k5k5k5J26J27j18j17L8L9m9m8oJ06R0j35j55O8
351B9J22J1k3k2O5O4J0RJ0Rq8q8l2l2O6O5RRP5P5j8j9KLKLkkjkJ06J06J7j70j15P2J28n8j60
349B35K8K17J05j21j21M1M0k0k0J41J42l8j51l5J52R1r7r8J3R4R3l1l1J7J6P2P2j09j09K3
348F11K2P7P8P0P1j2j24j16P0Q6k6q3q3Q8Q8noO1O0MLL0L0Q7Q6o1o0o0o0J62J61L1L1j2j1
347A288M5M4N2N2N2N1J19J19O2n0o2J25K45J32L4L4J58J58O7O8K73L86K91J04J46K58K43J31
346D625J78L65M11K23N9N9K80K81J86J86J47J46K03K03K83K83L39L40K97K97M28M29K79K80
345A0807J86J85O8O7o3o4k64k65k64k64m09m08l52l52l19l20j13%j57l44l37j49q4q4k03k03
344F295k68k68k11k12k59k60l16l15j55j54k10k10q9r0k20k20p0o9j63j63p5p6p6p5k13k13
343A645K4K4n3j66j25O1J58l0j19j18nmo0o1NNj26j26J28J28p8p8j0j1o6o7L4L3o0o1O7O6
342I54o5o5n8n7kjK8K8K8K8j16j15o0n9O7O8o4o4K7K8K7K8j0j0j41j42M5M6M5M5j7j7r9r9
340B31oJ82J26o2r6r6K4K4k7k6k7k7N2N2mnp6p7R2R2k8k9k8k9m6m6M7M8J2J3J2J3M0M1j28
339B38j28M8M8m6m6j5j6j5j6J17J17q2q2j3J01O0j27r0R8K13J00j47j47k3k3k3k3L4L3O0N9
338B64p2p2L4L3L4L3m8m9m8m9POPPP5P5r4r4J3J3P0O9ppn6n6LJ16J58k9j54j55P8P7POOOm2
336A65m2m2m2L9L9n5n5j3j5j4j5O8O9o3o1P1P1j33j35Q8Q7l5l6J2J23Q0j08j08LR6R7o0o0
335A6o0o0L4L5L4L4llllJ05J05j65j63l6J51J02q5j00J1o4o4O6O7O5O6RRj0j22m3J44J87p6
334A80k32j22Q1Q0J0Rq3q3R2R1kkk6k8O6O6p0o8K4K3lkN3N4q9q9M2M1J0RO5O6p3p3K1K1PP
332G3O3O3n0n1n0m9J0J2m4m4P3P4J7J8q2q1M8M9o2o3L0L1R7R8p0p0q7q8OOM9M9M8M9nno1o0
331e9O3O3m8m8K6K4K5K5m9m8m9m9O1O1O0O1j27j28j5j6J88J88qk33j45Q0J84m0j12jL4L3L9
330D0L8j8j7n6n6O3O2o9M1J20j05k41j6J81J79j19j19O8O7m4m5m4m5O7O6O6O6k5k4k5k5q4
328e3q5J03J01RRRRr9r8Q9Q8j00j02Q7Q5l7l7P4P5o1o1o0o1L9M0L8L9j22j24j1j1P9P8J33
327F2J34j06j05P4P5q7j97p4J50L8L8N2N2q9q7K1J33J7k07j06J20K05n6j52m0N6n7r8Q8J67
326B1N5j20qJ03J05p6p7ONNNr7r8n5N6J28J6r0K2J04J04j43j43mJ08M6M4K2K2K1K2m4m5m4
325b4m4M1M0j5j5J09J11pj19j00J2O0n0j65j65R5K07O8m4m4O7Q5k8o9o9N3N2llm6m8j0J02
323C4J29n8j32j33J10J10O1n2n8n7M6M7O9P0j12j10p4L7P9Q0l4j45r7J6J43L0q6q7J24J22
322G2Oj05r7J5J25J25N8n5r7r6rJ02M8o6j13j14O6O6N4N4kk%%j%PPOPp0p1j27j27J32J32l7
321a07l7R5R4L9L9MNq9q8opopL0L0K9L0l2l0l2l1M2M1M3M2p6p5j9k0O3O3PQr2r2J13J13m8
319C6m7M5M6m2m2J3J5l1l2l2l1P9P8j5j4q1q1J2J2R3R2%jj6j6j5j6o0o1L3L4p9p8N3N3O4O3
318C1o6o7k4k4P0P0M3M3M3M4j32j30L8L7N7N7l6l6J6J5p7p8M0M0j6j6O4O6k8k7j0qM6M6P8
317A69P7r1r2j47j48R6R6mlmmJ9K0l8l7J53J54n2n3j23j24M5M5M0L9n2n4J02J03M6j41j39
316a02k9K8K8M5M5m8m8QQO4O3l8l7J8J8M7M7j0j0r2r1P7P6m2m0N1N2mmmmo6o5K8K7l4l5R6
314B3R6q5q4RRPPPPJ1J1m3m5POOPL5L5L6L5n1n0n1n1J06J07r2r1j7R5J45m2j37k5L1L1NMO2
313G6O1l6l6l7l5L2L2J27J26k01j99%J88J04q4j60m8N4N2O1O1K8K8o6o6n1n1M1M2K4K5K4K5
311A41o8o8K6K5n3n2M1M0K3K4K3K3j07j06j3j3Q7Q5L1L0l9l8J8J8n3n1LMq1q1J0J22J28r5
310a6j04J21J65n9j25j25O6O6J0RO7O7J1J0p8p8p7p8M7M8M8M7p8p8J26J28o4o4j3j5M0p1j42
309a89Q2J17Nm3O7R3k0q1p9M1M0j5j6N5N5p6p5k9k8O4O4k8k8k9k9N8N7N1N1q7j99j09J17K88
307A45O4j52j51N4N2llk6k6k7k7O2O1OOm6m7m8m7J15J13n4n3K6K6K6K7n4n4n4n4O3O3O2O2
306A07j4j4p1p0O7O7j00j01M5M6j1j1J1J1J1J0P5P5r4r2L4L4k1k2L8L9n3n5K4K5Qj05m5J79
305B7J10km9m8%Jk1k1p8p7l9l8J30J30QRQRl0k9k9l0K2K2K1K2l8l9l9l9O3O3OPk7k7k7k7L7
303e9L7j9j9N4N3l9l9M6M7q3q4P4P3J8J8KLn4n3KKKKJ2J0J1J2N8N9j03j02J4J24R5j30n9o1
302g6j8j9K8K9Q3Q5q9q8M3M1J8J8l9l7l7l6l7l6J14J12j7j8l1l1l2l2K1K1K1K1l0l0l1l0R6
301d3R5Lj09j25O3J14Kl6P4P6l7j23j2J1J2K3K2K3K3m1m1N1N2n0m8M3M4llN3N4j65j63J10
299e1J08l0j41o1J27J40K9j39j40P7P7K0K1j06j08O1O1O7O8o3o2J6J5J5J5K2K1n9o1k8J57
298F8J19j44k11k4J61M7r3r3J05J05J0J1J0J0k2k2j6j5KJ15J08p9j57m6J48L7j39j40R8R6
297D9k7k6k7k7L1L0L2L1j65j65J15J16Q1Q2j2j2m0m0l9m0O0O2O1O2j17j16N1N2l7l7N6N6k4
296G6k5k4k5j18j20Q7Q6K9K9o4o5rrQ5Q3J9J9l7l6lkN2N4j02j04J03J02L6L6n8n8klklnmM4
294F2M5n8j69m1J83J69n6j10LR8R9j00j01n9n9lmL9L9j7j8M9M7m5m5M2M1M3M2r5r3j%J3J3
293d7O9O9ppppl1l2K5K4l9l9J7J5LLKLj3j2j3j3j2j1j2j2Q7Q8j11j11N6J68J07j17j59m8Q2
291d2Q0m0m1J6J6j8j7L9L8n3n4M0L8klK4K6m8m8J50J51r3k04j08J18O8m2NNm0m0J3J25R7j28
290B8k51k7N8N8k1k1Q9Q7p9p9N7N7J13J13p1p2j5j5rqP7P8j2j23o9J54J64o1q9q9k2k3q0p9
289a82R8R8M2M2l7l7o4o5N8N6l5l7m8m9M5M5LLN9N8K4K5l2l1k4k4MML6L6k0k0k0j9p6p6J11
287d9J10k0k0l1l1j3R8O0j27j84LJ83P0j23j1J49J50j55j53R5K08K7k35j48J13J05oj5j6M8
286H2o5j09LR3R4j5j26j49L9K25J13j24j22K2J34J1j02m8O2Qj05m2P1O3m8O0O2l9j50o4J24
285d2J41j19j34N4J33K1j25j3M8M6o1o3O4m8o3M9K10R8j22j21P6P8q5q4Q3J96K7j61j11Jp
284c4pj4R8O0n3l8l8l2l3K4K4m2m1M7J59R3j69j82NJ43L0r6J6J03rj44M3K45J34j47k58j6
283a29J71k5k11j18J45J54l3m5O8J25r9j93q1J20K32J05j20j04PR2R4j06j04M7M6l9m0P7J90
282B26J29r6k22j08N7N6PQq5q6J16J17n2n2k4k6k5k5k8k8K9K8N1N0K3K3P1P0o1o0p3p1O1n2
280e2o2J61J27J5p0M2J9k05j89L6K02R0o0n9O5m6j87L6K14K14r7k09p4J50Q1l3q6q5j1j2M5
279d0M4q2q3J24J22p2p0j5j5O0O0MMj9j8j7j8l7l7R4R3r3r5P5P3n4n6O8O8l0j41q1J43J20
278G9Pq4q2M2M1M3M2n2n0k3k4o4o4O6O7JJK9K9k8k9k9k9L8L7j8j9P5P7m8m7l9P2J73j6j90
276a6j91J16J14lmn9o0N8N6l6l6o8o8J38J37l3l3N4N3J1j02r9Q7J20o7j80p0O9O9n5n5K4K4
275a05N2N2mmN2N3q8q6l1l1k1k2P3P3n0m9PJ19J21o6j10KJ9K0K5K6J01J01j43j42J5J5M2M3
274E9q7q8M4M3R0R1j15j14j2j3M4M4M1M1q9q9M2M2j5j4%%N5N6p8p8N3N1KKk5k7P8P8r1q9J0
272e8J1J1J1K5K6Kj09o9M4K04K05k1k08k01O1K15J03j29j27q8K4J7J8P5P6q6q5j4R8J2r9p6
271a32L6O0N9J1J2J1J1j1j1mnn1N9O7m5j64n3J51J51j9j32p5L6J8J8K4K5OPOPM1M2n7j68j22
270a91qJ27J26l9l9l9l9L9M0L8M0J1J2j2j24j10LJ01J00k8k6R0k1j36j37J29J29l6j49l0J58
269b1J15Mj5j5r6r7KJ13Q7k4j1j0m2m4J3J3n4n3L9J52L9j48j42M6P6P6q0q1Q9Q9L3L2opo3
267Io3k2k2P2P0m2m1m2m2P7P5j7j7K6K7o5o7J4J4P0P0n3n2n3n3J02J02k9k8J2J3q1q1l4l5
266a86J35J33llr5r7R1R0L5L5j34j33llR1R0m0m0M6M6m8m6OOO2O2K9K8o5o5J4J5j16j17P2
265a08P2J6J6Q2Q4q5q4jjn7n7R1R0m1m0k5k5O8O7o0o0mmQ7Q9m3m3o0o2L3L2l4l4K3K2J%%%
263e5O6O7j01j02N6N6l8l7O9O8J2J3p3p2p3p2J8J7J12J11ononj8j7p4p4J16J16K3K3j02j01
262h8K9K9J0J0J0Rk3k4k4k4ppQ8Q6m1m1m1m1K2K2K2K3l1l0q7q6J04J05J0J1p6p6N5N5J06J07
261A66k4k5o7o6j24j23J22J23K8K9k0j9p5p6J08J08j61j61j1J75J33K1j6j6k3k3rj0M6M6L4
259I0L4r8r7N9N8KLr1r1P7P7J11J12j32j32KJKJk6k6k5k6N1N2nmK8L0o4o4J01J02j26j28K9
258a13K53J46k29k12J3J01j1q2L1J53M3o4o2O0O1o7o5j0j0O4O4o5o7m4m5J24J23p5p5J9J8
257b3p1p2N9N9O8O8r9j00k3k4P1P0j6j7p2p3J22J21O5O6q7q7l0l0L6L5j9k0K3K1p0p2Q9Q7
256E5j10j10R1K02%k25j21J04J59o4j72N2J13Jj07OO6O5q9r1M0M1R7R7p1p0L9L9j8j7o3o4
254a25O7O5OOp9q1K9J40J48p6r3r2K4K4K9K7k6k7m9m8PQL2L3Q7Q9J1J1m5m5q9r1M1M0l5l6
253a13K1K1M8M7M9M8m3m3m2m4K2K1P7P7o4o4O7O7K2K1j07k18o6J59J65n9j99K4K27J16k27
252A0k27J57K69K9j96p0J52J37q8j68N8Q5Q5o9o9n6n6L7L7J6J7J6J6P9P8j21j21J8J30P6j49
251A12j63O1J91P8j07j08J7J6M8M7q4q5q9r0P9P7K8K9K8K8L5L5r7r5M6M8M8M7j3j4j4j4q7
249C8q7J18J18l5l5l6l5MMNMj1j1M4M5l7l7R4R4j8j9j8j8L2L2k5k4Q5Q5j22j21K7K8K7K8M9
248B72M9m5m5r0r0J15J16jjr5r5K3K2l4l4ONR9R9K5K6o2o1n0O2J12p6j57m4J88J87P7j11r9
247B93j00J5J4J4J5N9N8o5o5jJ12J04q3j06PJ00J00RRQRQQQQl8l8l8l7K1K2J15J16m5m5m6
245E25m5J5J4J4J4L8L8L8L7l6l7l7l6L4L5L5L5m6m5J23J23j3j2j3j3j68j68J51J50K2K2K2
244H16K2p0p0O2O1k3k3P1P1J6J7J7J6M3M2M3M2q2q2J2J2m1m0N3N3K5K5J19J19p8p8Q3Q4l0
243A307j43m4J80Q6k7L0J42O1j64j57O9J91J91L7L6p1p1K2K3L3L3L3L3J32J33l6l6N1N2m2
242B084m2J56J55n0n1Q7Q8J44J43Q7Q6pqM9M9J05J05J4J4P0P0J62J63L1L2J38J39J39J39N8
240D349N8K27K26J36J36K67K66K20K20J64J64K21K22M28M27L39L39L95L94M89M89M32M32N68
240A1608N67M73M74M81M82M81M82L63L63K32K32K80K79J48J48M8M8M9M8onr9j00j8j9L8L8
238A7115n8n7j52j51k31k31k88k87l05l05m36m36n11n11m55m55o19o19m87m88n04n04k98k98
238H429m72m73l03l04l32l32k38k38j94j94j38j38k24k23k24k23k4k4j55k67k60p1J7r5k44
237C056j32M2M2j27j27j27j26k2k2k2k1j34j35L5L5n9n9j14j15j20j19J17J17q8k01j49L8
236A463P4P4m6m6j10j10K1K2l8l9l8l8K5K5o8o9m4m3J2J2j87j88R3R4MNMNn5n6n5n5J5J5m2
234F36m1r7r7P1P1L4L4o0o0K0K0p5p4M1M1R6R7k06k05o8J20J17J18kkq0q1k4k4K8K9K8K8q1
233C52q2M9M9MMO0O0j63j63k7Q6K4q9q9K3Q7k7j2j2qrQ5Q5j4j4L6L5l7j50j43M5J25J3oor
232A62j0P3P2M7j42j48L9Q5k7j10LJ10J11q9q9J%n6n5Q7Q8N8n5n5n4L2L1p2p2K1K0M3M4L6
230A29L6l8j50j44M3J13%n1O1J17Or3r2P8Q0n2n1QRRRm7m8PQL8L8j9j7m2m3J3J4ONONj8j9
229h6j9j9J0J0J0J0Q4Q3m0m0k9Q1J9J9j6j7j6j6K0J9o7o6n7N6O3n0n0O2O1m9m5O9O7m5q4K7
227d1J14Jj32j33O6O6l9l9J23J21o5j78m7O6K8K9L6L5j51j52K2J34N7n5m9O4L4L3n3n3O8O8
226b2O8O8r8r7O3O3J7r5l2l3RQR5R5j3j24l8P3O7m5J8J8M3o9o9M3J0J0l8l9n5n5l2Q1J05p
225gl1l1J5J4J4J5QQnJ07R0k2j5j6j9j32q3K9R4j7j03QO4O4k2k2n7n8j28R7J15J15j51j52
224b14J24J22qqKLKLkln7n9J9J9J9J9j0j0M6M6K0J9j11j11J22J21j0rj23j24M5M4P8P8j6j6
222F0pqpqO2O2OOJ5J5j40j38l3J92J93l3j22j22J06J07o4o5K9K9l7l8l8l6J6J6N9N9J66n9
221B43j02j01L4L5k1k2Q3Q3j24j22M9N1N0N1O8O8o3o3N9O0j09j10K0K0K0J9J6J7J6J6j06j05
220C0O3O3K1K2l5l4M0M0M1M0k1k1k1k2J6J5J5J5n0n1OOJ24J24j12j13K5J37K6j61j32J30K18
218D44m3k02r0J50J49K1K0l6l5l3l3O0O1l8l7R3R4r5r5L7L6m8m8Q4Q3n1n2NNOOOOO3O3o8o8
217D20P1P1J5J5j18j19N0N0M5M4M4M5j10j11R6R7ooooJ2J1J1J2l4l5j5R7O1j26j25O1K08R6
216H15j48j49J19J19j3j2OOm3m3M0J52J07q0j80o7J01J02K3K4K4K3N4N4j14j15J5J4J5J4j9
215H44k0o8o9M6J59J51l6j42k9K03K03M8j39j53m0J2J2J9J9P0P0J3J4LLLLl4l3l3l4J05J05
213A275k6k6QQO4O4%%j%R0Q9p9q0q5q5Q3Q4Q0Q1j3j2L0L0L1L0L9L8K0r3l0J58J58l0j70n7
212A673P4P4J3J3J3J4m8m7M6M6N1N1N1N1r5r6J48J49k4k4L2L2m6m5J23J23j8j7L9L8j08j09
211B177J35J35K0J9J9J9j22j22M2K29J58k9J2J25N9j30j29N8K13J00l1l1M1M1n3n2R0R0lm
210C076j9k0J11J12JJn5n5NMJ36J36MNR8R8q7q8J19J19L6L7k0j9j2j2J45J45N6j31m9J38K01
208D216J4p5p5J01J02QQN2N2N3N2L6L5L6L6N9O0J16J16M2M3M2M2P1P0P1P0J53J53n4n4J0R
207E670J40J40l8l7R3R4J33J34P8P7J18J17j4j3J01J02J95J96J1J1J06J05J05J06J05J05O1
206H001O1J92J92J40J40J40J40K07K07J50J51K32K32K89K88J08J08J64J64L13L13L70L69J77
205A2848J77L83M96L97K09L74N60N32L44M00N88O46M58M71O57P69P69Q70J132J170J056J073
204B6379J298J554J666J806K182K413K526K955L779M333M558N070O046O821O708N829N154
204I1077M705M479M344M343M161L335K614K614L376L900M022M248M524M525L657K383P65j709
203A51363n506r631j2568j3543j2868j1593r984q258o684n558m782m107l517k992k668k443
202C4661k188j962j691j579j515j402j269j157j107r95q66q65q02q03o32o33o32o32m42m41
201A3048n21n21m42k16k09m35m54l41k87k87l76l75k06k07k65k65j34j33j73j72k67k66j62
201F334j63j62j62j03j03j59j59k4k3k31k30m2m3r6k09k20OMLq2q2q2q2j05j05j62j61P1P0
200C498j35j36m4m4m4m5q2q3k7k6j04j03j0rL1L2k01k01r0R8O3n0j02J1J1j02r4J8J04qj26
198B000j26kkm3m4J3J2q1q1Q8Q7n4n5j11j11n7n7J12J11p2p2j6j6L6L7r4r5L0L1L0L0j75j75
197A078O9O9k6k6pJ05J08q0r8r9p4p4j8R5J10p8j97q4N6N7O4O4m7m6n4n3mj16j09P8J79O7
196I09o5o4m5m4m5m4K1K1l5l5QPPPQ8Q8j18j19LKn4n3R6R6p3p2P0P0r9r8oopoP2P2k1k2N2
194E58N2m2m1QQm7m8l5l5k8k8M3J56K7j99r8J26K44J8k00k00O7O7j22j23M6M6j1j2M2J55J22
193E16j03j26j4N0N0p4p5M3M3n1n0MMn2n3L1L2L1L1j11j10N9N9L3L4n9o0R0R1p9p8k9k9J02
192A50J02n7n7L8L7qpqpl8l8l8l7O7O8k6k6l7l6N8N7N0N1ooj01j02pqj3j4j2j4j0j0M6M6M5
190I2M5m9m8l2l1O2O2q5q3M7M6K9L0K9L0MMn3n2nmnnN5N6j74j74L0K55J31r4j51m0N2N1m7
189b2m8QRo2o2O9P0J8J9l8l7R5R6l5l6k2k2O9P1p8p7p8p8R6R5L9M0r8r7lmmlR0R0j48j48m6
188b72J80J72n1l6P4K5q8j50P4J14Kj26j26N4N3R6R5O6j59j66N8J99Q8j16j15M9M8q0q2R1
186b9R1p6p8J7J8p7p7J9J8P5P4j7j7j7j7N7N6p3p4O5O5RJ0J2J1j18j19J05J04J4r8n6J67Q2
185A26j42j39Q7K03k2j37j39J7J6j28j27J16K29J13p3j56m3Q7Q7L7L7l1l0l2l1n1n0J18J17
184E9o2o3pqL8L7r3r4M3M3M4M3L3L4n9n9O6O4j02j03l5l6N8N7M2M1n2n2n4n4P8P7l0l0l1l0
183a97P2P3P1P3L3L2o1o1L3L2r8r8R6R5p3p1k2k1L5L5rj0M6M6R6R5o4k51j46J16K00J3j12
181b%Q1l1j12j13Q7Q6n4n4P6P6k0k0k0k0R4R5l6l6q0q1o9o9rJ78J92P9r9r9K4K5j04j06O4
180g7O3P6P6j8j7k0k0k0k0j7j5L8M0O9O9k5k4j31j29JJP2P1J5J6J8J7l8l8J1J0m5m4N2N3m
179F6lL1L1j00r9N4N4N4N5k2k1k2k2J7J7J7J7n4n5J15J14N2N3j17j16L5L5R2R1j05j06O4O3
177B85m3m4N0N0QQQQRQRRJ5J4J5J5o9o9K5K5L9L9n4n5J6J6J6J6L7L7r5r4N0N0N0N1j06j06
176B43K6K5J12J12j9k0o6o6K7K8n6n6P6P5J27J28j17j17K7K7k9l0P9P8Q6j40j26O2J16p2j45
175C95M3J28J5j62m8K25K26pj94n8N4J05J04N5N5n0n0M3M4r1r0J16J15m3m4N0N1KLN9N9M8
174A158M7M7M7J8J7J7J7J23J22O7O6%%J31J31j3j3J55J56R3R3R3R3J48J48N5N4Q7Q8m4m4j05
172C052j05m8m9r9j00onJ16J16j28j27n5n5M0L9jjJ31K43J20o7p5L8J61J61J12J12q5q5q4
171C266q5m1m2k47k48K5K4l2l1j19j18L8L9p5k62k06j8N8N8o2o2l8l9l9l8p5p5J9J9K1K2l5
170A602l5l9m0j33j33J53J54j6j5k8k8k9k8J39J39j43j42N1N1nol7l8J9J9K2K2K3K2J12J12
169A745j9j8KKKKJ00J00OOO5O5O5O5l6l5N9N8Q1Q1J37J37LLN9N9J27J27J83J83P7P6J71J70
168C908J33J32J89J89J26J25O9O9J75J74Q1Q1n3n3LLK8K8K8K8J14J14N8N8K98K99J67J67K99
166G037K99K05K06L74L74J31J30Q1Q0j25j26j08j08k77k76k39k39k38k39j50j51j9k0J50J49
165F901N6N5m4m4j75j75l21l21l20l21j71j71l02l02k29k29j54k67k47o0j4j28j62j61l8l8
164B618k3k4q0q0o4o4pqk16k17R1R1l9k25j32N5J33J33o1o2j10j11K1K1N0N0porj0rrQ3Q3
163A856j23j23J00J01POK1K1P7P7p2p2K2K2J42J41r1r0j5J72J87P4m1m1Q4Q3O6O7J0J0P0O9
162B817J4r9jJ87J86%r4J9K26K25J8J8J12J12J80J80J80J80J61J62J61J61L01L01J70J69J6
161F062J6J6J6j84j83j27j27j96j95j95j95j63j64j63j64J4J3J4J3P0P0J4J3M7M6j0j0J13
160D461J13J14J13M4M4q7q7J12J11j12l36k58j46j67j66j63j63j63j64k23k24j67j67r5r4
159B130r5r5O5O4j40k52k09J6M0p3j21j21MLl6l6l7l6o5o5o5o5%JJ%n8n8n8n8N4N4p7p7jk
158E32n6j68j01J25K49K4j40j40N2N2o1o2L3L2k8k7k8k7R1R1m1m0j61j62QPJ15J15j6j6k1
156B31k1p7p7L4L5L4L4n2n3MMJ2J2O8O8j17j17k2k3J7J7J8J8k3k3P1P1N4N3p8p8o9o8O0O2
155G9J9J8p5p4j4j4j4j5J2J2J04J05m2m3m2m2m5m5Q0P8O6m7n4N8M8o5j13jN6N5PPmlmmL4L3
154A11j34j35L4L5j5j5K3J35P9l4o6o5N7N8j07j07m0P3J13J11K2r2j31k0J41J42J4j75j29
152a17N8J27n9j36k4M4M4m3m3J28J28m6j56o4M8P2P1M9M9j45j46k5J63J19Qr7r5K7K8L4L4
151C5n8n9L6L6L5L5l3l3q2q3p7L6J03J03l7l7J9J9n8n8KJ15J00j1p1p3M3M2j4j4j9j9j8j9
150a14L8L8L8L7L8L8L1L2l3j45j87%K12K14k4j36k5Q8oj19j07NJ02J02k2k1k2k2Q2Q2j6j28
149E0r7J5L8L9o9o9R9R9J6J5m1m1OOO3O2p8p9k2R1R7r0j33k2J35J37k6k5kkn8n8J13J13q7
147A95q6j7R7R6j6n4n4o0o1O8O8J2J2J7J7p7p7J07J06Rj04p0M2M3p0j5R8M5o6q6J01J46L3
146C99m2m2M5M5n3n3L4L3oj19o3N0J57J57j04j04nK20O5j59j75N1J49L6r2K0J44L2r6r6J33
145E61J34l3j45m7J78Q3k9m5m6N6N6%JL6L7L7L6p2p2N9N9M4M4j2j2JKN8N9n3n2M1M2OOO0J73
144A251J38q6p9L3Q9k3j42Q2K31J18m9m8O1O2l2l2J40J41Q4Q4M4M4M4M4O5O4O5O4J40J39k9
142B707k9K90K90M9o4J09L33K40J4O0J73J65N3L2J44R5j7j1K15K07j7j38j38J6J7P0P0J4J4
141D963n1n0n1n0J3J2m3m4Q5Q4lkj2J01M4o8j9j8j9j9n3O0N9n2n1n0j07j07q6K7Q3l0j13j13
140D320j12j13j23j0M6o6j70j71q4q4j49j50M9N0j0j23j23j0P3P3j3j4K6K5j37j36n9N4l3
139B826j46k11r8l8l8Q1Q0rj97j28N9J48l9j57m5P5l7j62j61M2J55M8o4m9n0K1K0K1K0K2K2
138B011K2K1j0rllN0J62J06om8m7P7P7O0O0J0J1K8J41J48L5j12%J78K91J71N9J29J29R7R6
136C931J91J90J41J41Q5Q5J21J21J20J21J01J01J57J57L1L1K00L12J62k5K6K14K35M6p5L8
136F958J01j2p3p2J33J32p3p3MMn3n2j09j08n2n3n9n9o0n9j12j12j12j12j06j05j61j61j13
134E271j12n6n7j33j34l9m0j13j12j69j69l6l7l6l6r9j00k30k30o5o5j22j21n4n3j47j47q1
133B478q0q0q1q5q5k9k9p7p8J7J7j51j51k0k0Q6Q6m6m5j67j68P7P6r8r8P0P1l3l3l3l2%%%
132A259%K6K5o8o8l3l3K3K3M5M5M4M5p2p3N9N9llllO5O5RQN9N8N9N8K4K3K3K4M8M9qqK8K7
131A905K8K7M6M5J01J02M2M2M1M2k5k6k6k5L2L1L2L2M2M2r0q9K3K3K3K3P7P8n3n4K4K4l2l3
129B474k8k7k8k7O7O7r4r5k1R1k4k11j46M2Q1l1p3p4J3J3m2m2m1m2m1m0j71j72K2K2l4l5j15
128A238j14n9n9KLN8N9j33j33l9l9l8l8l7l8l3l3K4K4k6k6k5k6J3J2m3m4K5K4K5K4q1q1N1
127D37N0k7k7k7k7O8O8J2J2j20j21k6k7Q6Q6m5m5o6o6O6O5p5p5J9J9N4N4m0m0O0N9l5l4o7
125B25o8O4O4P3P2k1k2m9m9n0m9M5M5M4M5l4l5l5l5POPOQ4Q4j60j60Q0P9m4m5nJ08O8j20p2
124A53J16J67k1r5J7L6L6m9m8PQk6k6L0K9j0j0j1j0j6j5j5j5Q8Q7l6l7MJ17J10p8j37k5O9
123C94O9q6q6M6M5R9R9M3M3j26j26M3M3K2K2P9P9q1q1k5k4J18J19j3j3q4q4q5q4Q8Q9L2L3
121F07o8o7O4O4K2K2P8P9PPOPj06j07J00J00p7p7J6J7J06J05k5k5k6k5O8O9l9l9N4N5mmN2
120A016N3p5p4K0J9l9l9R2R3k9k8K7K8M3M3M3M3r3r3%JJ1J1J68J68mj91j42M5J10lKJ14Q0
119A420l2q9K4J14Ko0n9R2R2l9l9j6j6j6j5L8L7L8L8K3K2K3K3o3o2O9O9J53J53n3n2j1j0j0
118A788j1K3K2K3K2R0R0mmj2j2j2j2N8N9N8N8p7p8J6J7O5O5RQM1M0M1M0O8O8k6k6L5L5k1k2
116B522P2P2P3P2q3q2J1J1J19J19J19J19j9j8L8L8N0N1ooR6R6KKM7M6M7M6P4P3P3P4M0M1M0
115D069M1R0R0L3L4mlN3N3R5R6L9L9R4R4%%P0O9O9P0K5K4J19J18K12K12M4M3J51J51J50J51
114F591J62J63J62J62J16J16K47K46J28J27J27J28L98L97L25J01J84K97L88L89L69L69L69
113A2061L69O31O30N77M64N60P85Q98P86Q04J029J191J190J215J439J556J557J650J650J857
112C2899J856J930J929J911J686J482J257Q42L17L2k32o13j176j707j819j791j791k085k086
111C2841k015j828j731j618j445j332j237j125j068r56q97p85p09p10n81n81m87m87m43m42
110A2364l42l42k51j39j46l34l84k71k8k7j24j24j24j24o8o9j2j3n5n5L9L9L9L9j8j7Q2Q2
109I617J38J39J87J88K81K82P8P8K47K47M19M19M19M19M50M50O55O56O49O49P12R00J006J007
108B0292J019J018J190J189J096J096J066J066J066J066R41R42R49R49R93J106J009P48M53
108C9254K65J02l11q60j122j168j169j334j334j427j428j303j302j303j302j318j318j112
107B0510j111j187j186r06r05r38r38p32p32o86o85o17n05m05m06l98l98l26l26k69k69l11
106F274l10k80j67j48j47k34k34j46j46j46j46j77j78q4q4r7r7j0j0q0j93j37k4n0n0m3m3
105B813n4n4o0o1k9j42j48l6J08nj78j78J7J8m3j56o2N0J36K5q6q6j49j50J2J1j2j25q9K3
104A310J09kj30j29O3O3l2j45q8K4J3J4J3J4N2o0r1r1N5N5m3j56p2M0M0p3j23j1M9N0n6n5
103F07L8L8m2m2m2m1KLN2N2Kj11j10KJ10J11n5j68j36k3J13J13OOn0n0lmmmk3k2k3k3J10J10
101D99j34j35N5N5kkm3m4N0N1p0o9O2O2o2o3ooJ19J19q7q7l6l6l6l6M9N0M9M9q8q8q2q0P3
100E0J85J63o3j98q5Q0Q1o4o5L0K9o9p0m0J83J51p4j65n3J08J07r2r2M2M2m5m5L6J48N7j68
99A04k22KK05R3j5j5k2k2n1n1Q0Q0q2q2J25J24n7n7n7n7J05J05k4j37j39Q4J46L3r0r0P1P2
98A59l8l7l8l7N3N3jj13r6J27J28r7r4J8J04rk09r9J51J49j17j17J26J25l3l3l2l3K7K6K6
96C9K7j8j7p3p4M7M7m7m7K0K0K1K0J1J1O6O8j08j06K4K4p8p8R1R1q3q3M9M8J9J8p6p5N6N5
95i1%jJ0Rm7m7jjkjQ6Q6pqm1m0N3N2j4j6j5j6PPn0m9rqJ22J22qro5o3Q2Q2j0j1j9j9j9j9j15
94a03j15R1R0O2O3o9o7J9K0J9K0k0j9L5L6k1k2k1k1j28j28P8P8j5j4P9P8j6j6P5P7k5k6q1
92gq2N8N6N8N8p4p3j8j8KLKKJ4J5J3J5r0r1P8P8j2j2M4M5PPm9m9j8j7L8L7j2j1j2j2P8P8n2
91G7n3r0r1P7P8KLn2n3Q0P9n1n0J2J1O7O8j17j17k8J58J61k7j89j91P1P0P1P0k6k5K9L1j02
89d7j04J03J02m6m5m7m6N8N8l6l6M1M0j5j6l2l2R9R8q0q0N1M9POq7q7Q0Q0n0n1l9l9R2R1q4
88d4q6l3J53Q7r8j40k7Q7Q7%JJ35J36j08j07l0k8K6K7m7m9M6M5j07j08n1J36J19Pm8m9M0L9
87A1n2n4K5K6Q0Q1m0m0l9m0j9j9j9j8R0Q9p1p2l6P6P5l5o4o4R0R0Lj09k3Q8J21Qr0r0pppp
85f9J01J03o6o6rj0j0rl2l1R2R2Nj07j07MM0L9M0L8L4p8q6K6J27J5q3q3J2J1j08NJ46J44j20
84@j22j2J00J3r9k2R0Q3k9LMlmM3M3j3j4o5o6o6o6j2j2j2j2Q5Q5K9K8RQPQl3l4l4l4J01R9
82G4Kj10r6J7P1P0M1p1j65n3J28J27l4l3O5O7Oj06n4N8N1o0NOJ3r8n3O0N3N2qJ05J05pj49
81G9j49k0R1O5m7j03RJ25J4j52j53O9J80O1j25n1O2O1n0k7J60J54l4j55j55PJ17J13Jk4k3
80A00M1M0r1r0L5L6Oj06JKQj05m0P3J21Rk7k6l4l4N8N7l4l5L1L0Qj03l3Q0K3q8J0J21L8j49
79f7o9J19J69j7j65n4P8P7p1p0o3o4j0J01L9L8K8K7R2k2o1n9j2j2O6O8L7p6r1r2noJ37J35
77A25mk28j66N8J56M4n7N5O1m9n2J73N8j66k44J29K50K7j86L7J69n5k80n6J59J59j20j22J59
76C4J59q2q2M9M9p7p7J7J5L2L3k4k4p3p4J31J32j9j9j8j9K6K6l0l0l8l7k4k4j16J08J76O4
75A64j54j53Q2Q2j9j7j8j8RRJ0Rj4j4M2M1p4p6N6N5rrM5M7m4m2Q7Q8m2m1m2m1j8j8P6P6j52
74c7j52j2K13J35r0q1K9J12j14j35k4R7R7o4o4J4J5J4J4P6P7r2r1L1L1L1L1KKKJo9p1K3K3
72b6o0o0P1P2O5O7o4o5O4O4k9j41j47M1N9n3o7J20J75j1j63n1J55J55j04j04K7K6m7m8M6M5
71A2m9m9M4M3k4k5k5k4O7O6o3o5J4J3J3J3KKN7N8p6p5N6N5ONOOn8n8L5L4q4q6M6M6JJN7N7
69E4l4l4K1J35P6j12j93q1J04J03k0j9k5k5L1L1o9p0O1O1K2K3K2K3n0m9OOL4L4k2k2J8J7J8
68G5J8j75j76L1L0J17J15j5j5m3m4J2J2J6J6J6J4K8K7k9k8nonoLKN8N9O6O6o5o5q6q5J44J46
67B23l4k20j34N3J94Q4n3j64o6M5R4j7m8m9L7L8J4J4J4J4J%J%l0k9K6K6m6m8M7M5J6J7m1l9
65a5l1l2k5k5K3J35R6r1j83MJ66J68r1r1KLrqrj0L6L7L7L6m7m8QRl6l6R4R4m6m5J0J0m3m3
64DJ3J3q6q8Q1Q1m3m3Q8Q8o7o5K6K7m1m2J4J4K2K2K2K2j40j40J03K15R3r3j00J0K9K9K9K9
63A26l6j49n5N7K1K2m2O9N1o2m7m8RRp8p8L5J48J48L5q2q2M0M2l5l3K0K2J0J0m6m5J5J6P8
61F5l3q3q4P7P6m5m7M7M6MNNMp0p2N3N2J0j02j5R6N6n5j04Pj9k0J1J24J11jr9r8o1o1J08J08
60dO1O2N5N5n6j68q5J00P4l8r3r5llJ22J20N2o0o8M5pj19o4M9M6o6j08P9J53M2k1k2K5q6r4
58a20J8J44L2o6o6J08J08r8r7M9M9m4m3J0J0J5r4L2L2Q1Q1j04j03j0j0k9k9J39J38j3j2p0
57C8o8j5j5M1M0n1n2n1n2O8O8k6k6N5N4jjj15j16N2N3P8P8K2K2k2k1L4L4q0p9J3J4o3o2L1
56a21L1O9O8J2J3p1p0K3J35J08p9j59m9L8L7M4M4m9m8M4M4l2l2l1l3L8L8j8j8RRQRO5O5o6
55G5o7K7K7K7K7j1j2j04j06N1N1nnK7K9K9K9K8K8o5o5l2l2l3l2M2M1n2n2J17J16r0q8K6K5
53b9K6K5r2r3J14J12pqo3o4M7M7m6m6K8K8K7K8ooQ8Q8r5r5P4P4KLn4n4%j%jJJn5n6NNn1n2
52a51M4M3M4M2jkn7n8J0J0J1J0K1K2p2p3K2K1K2K1P2P2r5r6L7L8L7L6Q1Q0j19j18J6J27N1
50A48j36j21O5J54l3j69n7P4P4j9j8j9j8K7K7K6K8ooooomoojkjjK1K3p1p1J0J1O6O6MLO0O0
49A64p5p4K0J9p4p6j9j9L6L7L7L6K4K5K4K4klk4k4p5L5O7O6r3r3%%M5M6j1j1qrqqr2r2J08
47g7J06Oj07n7N4J14Kk2k0%Jo3N0J02J02n9n9J10J10n9j71n7J31J22j41j60K6K11R9j12j12
46G0J2J2o6o5O4O5k0j9P4P4q1q1Q1Q0p2j84NJ91N6j32j55L2J04rk7k6J2J0J2J1lln8o0K7K7
45d2M7M7L6p7j74j76Q7J99J04pj7j6L2L3q4q4j7R6R3R3l1l0l4l4q2q3j3J00M9o1j37k5J41
43f7J40lj15o0N3onK9L0llllppj00j01J56J55K5K4%jN5N6p8p8n0m9K2K3N2N1L3L2o1o1J9J8
42A12P5P5p5p5j9j9p4p3N7N7j3j3J18J18q5q5k8k9llR1R1q5q5k8k8M8M9ppRJ0L7L7j10j10
41g0R5R6n4n3k5k5kkK6K5k2k3k3k3M9M8ppm4m5M8M8K4K3mnj12j14J31J29k7k6n4n5o5o5O6
39a44O6P8P7j6j5l8l7j0j0N9O0l4l4K3K3l4l2O8O8k5k5m1m0j04QJ03J02Nj07n1n0L6L6L1L0
38B6k5k4L7L7n5n6L2L2k2k4m8m7P6P5P2m1j08j08J22J22j4j25o7M5M5o8k7Q6P7l3j16j16j7
37b57R4Q2Q1L1L2j4j4j3j4N5N6oj17k4Q7Q8k4j19oM9o2j18nR3R2k3k4L3L3m9m8Q1Q2j36j36
35a40jJ11N8n3n3N8P2m0k5k6k8k8k8k8O5O6RRl3l3r6J6R7R6Nj07r3J9J11J10K0r2k8k9P9Q0
34A20J9r3p4L7J25J2j46j48K7J37O1O2k6k6K9K8o5o6l9m1J6J5N1N3p9p9J2J3J2J2p3p4R6R4
33BPOq6q7nnJ26J25JKN7N8j30j29p4p3J22J22K9K9KJKKq0p8J3J4M8N0M9M9j17j16J4J4J1J0
31a5m5m6j9j8P4P4J9J9J8J9k0k1k0j9l5l4N9N9J9J9l7l7J8J8J8J8L5L4n9n9k5k3k4k4o3o4
30a87J73J73j24k34m6J41J56l0j07MQ0P8L0L1r4r4%%O1O1j06j07J6J6J6J6L6L7j9j9J7J7J6
28HJ7l1l2l2l2N2N2lmj8j8j8j8k5k5O9O8l2l3j0J02O4m9j03PJ45L4j33j32N6J68J17p1q9q8
27c7O7O8lln9n8j3j2M4M3j6j5L3L4l0j41j35N3K07R6j11j09J20J22j5j27J0J23L8j49j74J2
26a37K6K7ONO3O1j1j0Lj08j19pJ60J59L1q2j04j05l9P4J67N6r8r7O3O3J6J7J6J7o0n8L3L4
25F2l4l3R0R0nj17j16mR8R9k5k5m4m3J2J2NMNMq0q1J3J3M0M0j5j6mmN2N1n9n9K7K6M9o3j33
23a68R1J14Jq4K8P2l9j37j37J01J01PQQ1Q2q6q6N0M8m2j53n9J65J65o0j30k0L5L5j2j2M3M5
22D7poool0l2O1O2ppopm5m4M7M9o2o0O8P0q9q9P9P8n8n6kjJ8J8J9J7m1m2Q1Q2l4j46j7K06
20A02J01j23j72N3J25J4m1m0l3l4l4l4K5K5K4K5O7O8NNJ8r3j70N3K17qj74o2J64J64j10j10
19A7K9K9o5o3O5O7J0J0o4o3qqL2L1o1o2l6l7R5R3n1n1n2n2J03J01RRQRRRj15j15J6J6L8L8
18f0Q6Q8o3j73o0J27J62k5k44j33J57K67M9j39j03Q2Q6k6m7m6L8M0L3L2o1o1m1m1J4J4O0O0
16G2MMj8j7j7j7j2j2j3j2N1N2m2m1pqQ5Q6MNj15j13m9J37R4r4j39M8K03J8j72j73J34J34o0
15@o0nmm2m2N2N2O7O8k6k6n8n9P2P2l0l0j0J00K8j60j60K8Q4k8q0L3J35K2l9l9J00J00o9o7
14b1MMMMk0k0k0k0R9J00j00r9N2J63M9j38j82NR4R2l7l7N6N6o1o0nmO3O4PQm5m5m4m4O7O7
12E6o3o4J0J1m7m6Q5Q4l8l9j4R9N4j32j90p8R6K09J67N6m7j60j00J2P3P1NNq1q2k4Q9M7j37
11a13j05Q3J59M8rrN9n4j57L0J55M3j20qJ16Mj82j82J29J28qppqp9q0J53J52k0k06j51L7J14
10i5J13L2L2n2n1MMK7K8K8K7m0l9l9m0J2J2O7O8LLr1r1m9n0Q2Q2L1L1MLm3m3j5j5N4N4kko6
8b2o7J01J02K9K8k8k8l3l3nno0o1J08J08m3m2m3m1N1N2m1m1J7J9j13j13J05J04J1J2K5K6Q2
7A61Q2j35j35j07j08J58J57j1j1L2L1L1L2j34j33P2P1l6l5J9K0p0p1K2K3L5L6n8n9N5N5K6
6A5K7n6n6L8L6J9J8l8l7k8k8K9K8K4K3l1l3m2m2J63J64j10j09n3n4J13J11J9K0n2n1NNl2l1
4b6K5K3m7m9Q2Q3n7n7L5L6K3K3mnm6m4j7j8L1L0Q7Q7j12j12J2J1l7j50l5J52J52l4j48l6J23
3a9J22P4P4j40j40qrM3M2J5J5l2l3O1O1q9q9NMQ7Q7q1q0mmN1N3p1p2O0N8NNk3k3J0J0J1J0
2D6l4l2K1K3j2j2M3M4j0j0rj0RQj9k0j01j02O6O7J7J8l9l8M1M2J2J4N4N3j14j14J0J1L8L9
0@l6l7N8N6o5o7j4J71J51l7j88p7N4N4l2l2Q9R1j41j42m2J46J31J9n4n5P0P0l3l2j26j26O1
-1a15O2NNmnQ9Q9j47j48N8J70J1j75j20O7K09R8p1p1r0r1M0M1K5K5K5K4N9N9j10j09R1R0m0
-2D6m0o2o4L1L0j8j8J12J13l3l4l3l2o3o4J06J05ppM9M9n1n2n1n0M2M3m9n0n1n1M3M3O8O8
-4F8J3J2j12j12N6N6K7K8K8K8m0m0l9m0poooQ2Q1n0m9l0l1K5K5mnnnPPPPm7m6Q4Q4N6N6op
-5A44k7j38j81PJ53J53p8p7ooooN7N6N7N8j05j03K7K6k6k7L0K8j%j%qoqqJ09J09n9o0j23j24
-7a70QPK2K2P8P7o0o0mmJ05J06j00r9M0M0j5j6K3K4Q0Q0n1n1NNq1q0J2J3K1K1K0K1m4m4M9
-8@M8K0K0K0K0n0n1n0n0P7P8j5j6n1n1L6L4j7j28q4J03J76O5j04j03%J%%Q7Q7m3m4p0p0O0
-10f5O1J00J01j05j04m8m9M5M5J16J18n1j64j70J7J06pp9L3N7N6n0n1J17J17j21j20M8M7M5
-11D5M6m9m7l8l8N6N5N6N6%%m6m5J1J1OPq6q7j7j8J1J1L3L4J19J20r9k10pK16J10j15k01K3
-12g7J04qj24j3J48J50j25j24m9m8M5M5J03J03j31j33K1J34Q0j44j58O6J32J31p5p4j9j8p
-13f5pN0M8P9Q0n2n2oonol5l4opn7n8J11J10q4q6L8L9K1r0p4J51J69n5j46l4P1P1j6j5k8k7
-15a3q5q4J14J14K1K1K5K6o8o9jjN4N5l8l9l7l9kkN3N5NNq1q2p9L3J01J01o2o0nmK6K7K6K6
-16C7j22j23K0J32RJ0L8J52J1j03m6O7L4p9JJ88J60j03j87%N0o3j14kQ7k5j17oO9m4j72J5
-17b26J70J70j00r8J30J30m3j55r1K1Q1Q1K4K4j08j06JKL0L0Q2Q3p9p8k5Q6L8p4k3Q8J10k
-18A73q9q9m0l9p0p0R2R2L5p7OJ16J23o6j20j21L0L1k5k6N4N3Q1Q2j0j1j04j03l0l0N7N6N9
-20B0n2l2Q0R5j8j42l0J50J52n3j65j01J0L4L4o7o8O4O3N7N8j10j11K2K2K2K2j4j3M3M2j%
-21A3jjmmR0Q9r8r6m2m1k6k5L1L2mlk2R1J34n2j71o0J16J15m6m5P2P3r5r4Q4Q5m7m6j5j6M0
-22A1M0k8k6O5O7j29j27P1P0m0j53kJ86R0r6j49L9J72O0j08j08L1L1L2L0P2P2r6r5P9Q1n1
-24I1j62q4J04J47L5p5p3M8N0n4n2l5P7J24o3j81p0J25J25l6l7O7O7o4j76j20O8Q7Q6J2J2
-25D3J1J2k2k2k2k0PPPPk7k8nJ07J19Nr2r2O4O4o6o6NMMNJ1J0p4p6k9Q3Q3k8k9k9K0K0L1L2
-26C4L2L2q7q6P5P4J7r4r5J7J3J2n2O2J70N9j14j14L8L7j8j7NPm2m3j1J00J01j1j19j20o0
-28a98N4J24J24L3p9j36k4J36J38L2j56j61K5P8l5j17mJ77J79o3j75l9P2k0j34j5R7M5o7p8
-29a87J10J91P9n7n8n7n7p8L3J01J02m1m0m1l9j4j3P9Q0p9p8J9J31J7r5m8J38J06q3j58m7
-30h4M7M5klN1N0noj7j8j47j49K05K04L6L6n5n5n5n6k5k7k7k6Q7Q8q1p9L8L6j5j28m0J84J79
-31A86m7l5l6m9m9nnQ8Q9j10j10Q8Q9j1j22l2J92O4j62j53P1J71O0l1l1M4M4j24j24L9L7j8
-32Hj6j5j4j5j4O8O8r9j00P6P4n4n6l8l8J8J8J3J3J3J3O2O1o8o9J8J9J9J8LMn3n3J39J40k9
-34A34k9j0j0j02j04Q1Q1K5K5l6l6r1r2J64J65N5j70j72o0O9O9R3R5j72j72rK15J23j02K2
-35D9K3K7q5p1J14J15p2j60m8Q3Q2p2p3K1K0k8k9O4O4k4k6k5k6J1J2O6O7n4n3n5n4O3O2l0
-36d2l1QPQQRRRRnnN0N1o4o3qrk9k9J02J01KKn4n3J4J3m2m2N6N5%%KLn3n4R9J00o9o7J4J6
-38B8p0p1P9J90L4j53q5K7K1q9kJ10J03rl6l6J4J3l8l7l8l8ONn1n1J03J01RQp8p9J4J5K1K1
-39c9K0K0L0L0k6k6K5K6K5K5m4m4m3m4L5L3L4L5l3l2O1O1m8m8m6m8R9J01l0l1k8k9K7K8J1
-41H7J1l8l8J4J26M9j38k43n6J07J08j5j5M1M0l6l4l5l5K2K2P8P8l3l2q1q3P9J89J09p9k32
-42f3j21Q5Q5q7q7PPP0O9J3J2LKKLO4O6k8k8k5k5k4k5P0P2o1n9m3m3l7l6O1J72J29n8j20p
-43A5Q2l0j23j2J23J24j10j08K1K1j5j6L9M0o1o1oJ06O8j20j27j5N3N3MMQ8Q8q1p9O5O7r6
-45Ar4kJ10kj88o9J56K06j8j47l5J30J31o5o6o4o5N6N4jjl8m0R1R1p0o9O0O1o5o4qqm4m3Q7
-46c2Q7j10j10J33J32n9n7O4O5o5j76p9J46J22J0m4m2p9p9j3K11J61o5j88L6J61M9j17j17
-47e5P4P5n6n6J6J5l9m0M6M6j0j0k9l1K6K5k7k7K9K9NOONK5K4Q1Q0j06j05j05j06K4K4p0o9
-48b80J26J27m2m2N3N3N2N3l7l8N7N6n2n3M1M1k5k6q1q2N9N7l4l5klN4N3n0n2NNN6N7p4p4
-50g7N2N2K2r0m3m3OOL7L8L8L6j2j2M4M4LLn3n3n4n3L9M0O7O8O1O1Nj09m4m5llr5r6P5P5J8
-51EJ9N3N3p1p0k1R2R2k0j03j01Q9R0j1j22j24j1J22J20klKJr1r2M8M7j3j26j5R8R6j4p3M0
-53a6L8p3j1J01R2r5j12P5J29n6j82OJ94Q2j34j34J32J33K6q8k3k4l7l6N6N7j40j40L2J45
-54cm4j57l6J52J31n4n8N4K1K2K8K9m8m7m8m8NNN4N2N5n8n7N3Q7Q8%Jn4n3j23j1N7n6n6N7
-55f0J50L8j64j65P9J91L5j52j04QK7K6O3O2Kj09l6P6P6l7j06NJ02J03qqOj06j22j1J62J63
-56A86q5q4J09J10n2k38j58J05J06pq4K8ooj2R8L8p4o8M5M9N0onR2k1n1n1LLn2n4L8L7J56
-58A39J57k4k11k08N4J90Lj80p0J02J01j27j28J8J31J1J1O4O4k8k9k4k2O2O3J7r5j43M3J54
-59I5M3j26j25P4P3n6n7N8N6JJM1M1n3n3N7N7p4p3Q4Q5m6m6N2N2m2j53q5J02N9n2o9M3L0K8
-60B2l4l6K1K1M5M6q5q5K6K7k9k9j1j0M7M6K9K9n6n7J9J30Q7j01q6K5J07mj02j00j5j5O8O6
-61Fk5k7o8o8J01J00LMLMl7l7J8J9l0k9O3O5r4r5L6L6M2M1q8q9L7L7L7L6%JJ%L5L6L5L5q7
-63E7q5PPL4L6k1k1q4q6M6M6pqpqK9K8K9K8j8j7j9j8M9M7m4m5J9J9J7J9jjN5N5q2q1k5k6Q4
-64GQ4j20j22O1O1l3l3PPPPK9L0K9K9L7L6k0j9m2m2J4J4l2l4l4l4O2O2j43j44J06J07J3j00
-66a43n3J34R1k0k6Q4P1j17p7L5L4p6n8J29J86jk29j18Q9Q8o8p0J00R8k1k2k2k0K2K3K2K3
-67H8r8r8onN7N7o7o8L7J48J05q2j17oJ14Jj23j24J50J49l8l8J9J9O7O8k7k6m9m8m9m7k8k8
-68i3O6O5L7L6r4r4K6K5l0l1L5L5k1k1L4L3k2k2Q5Q7p5p4n3N9N8n2j7j7M5o5j05PJ17J17J6
-70I7r5r5J7O2O2l6l5j5R7L9j47j73J5J61J59n3n3O0N9p5p5l4P8J39K6r1r1K9K9k1k0l5P5
-71F0O8O9MLj03j01j11%N7N7k6Q5J42K9j61j61K4J35j7j29j7R4M2p1o4M9Q0Q2k3k4j17j17
-72a62%J12J26J5j02j02k8k8J5J27J44L3rj0j4j4p0p0k7k7m2P2J70O0j26j25N4J65j4j25n9
-73f1N4j7j6JJKJM2M4o8o9K9L0qj20j0J76J28J6l4l4m1m2m9n0O2O1M1M1j32j32RK33J86m0
-75B34k25j12P2P2POm9m8K2K1K2K2j0rj0rj%j%K7K8K7K8j%j%r9r8J3J4Q8Q9k3k4j9j8j9j8
-76bl9l9l9m0J5J5J4J5l9l8P4P3n2n3O0N9%%%%j05j06Q2Q2Q2Q3k9k9l0k8K6K7o8o8j3j2O2
-78f0O0J18J17m3m4j56j56J47J46l8j49k7J98R3j31r6J27J29r7k59l6J57M4o1N1N8n4j28R5
-79EK08j7k49j39J96J96j21j20O5O6m1m2m1m1MNNNj6j5M1M1n0n0J37J38j09j07MMkkN2N4q9
-80b5r0l4l4Q5Q4K7K9o6o6J20J21o6o5rqK0K0r1r2P1P1P1P1j38j36N0N0qpJ03J05o6o6o6o6
-81a01J14J16j46j47l5l4P8P8N5N5N6N6m1m0m1l9J5J5J5J6ppo2o3J37J39K6K7j15j14kkl1
-83b9l1K4K4m2m2P0O9m9m9O2O3L0L0q2q1m7m8O5O4P3P2m1m0n6n5n6n6O6O6m6m7J8J8J8J7Q0
-84C2Q2j00r8K0J31R8j28j12J10J47L4j19j19O1O1j7j6j6j6o8o8M4M4nnnnNNONJ1J0m4m5P1
-85iP0j09j09L7J48L9j84j56O9L17R3j58j58R1Q9K0J9K0J9M5M6j43j41k5k4Q7Q7r4r5J8J7
-87g4Q8Q9j59j59l6J90J96k8j09LL8L9k2k1L5L5p3p2o6o6MJ15J86l9j80o8J84J85j07k18j02
-88b12J22N2o1KJ13O8m4r3J8J17J17o3o3q2q2K9L0m1m1P2P1o7o7M5M5P6P8j6j6l6l5o3o3J06
-89A6J07J3J3o2o3j17j19J48J46n9n8nnN1N1o3o4K9L0J0QJ0J0o4o5K8K9K5K4l0l1K6K7Q2Q2
-90A60p5p5J8J8k0k0k0k0K3K2l2l3L2L0J26J25j32j32l9l8l0l0N6N7j4j26q1J06J21J0K7K8
-92D2M0M1n3n2k1k2k2k2K5K6K5K5l7l8j1j0Q3Q4q4q4O8O8o3o2J04J06o4j75o7J19R6r0j45
-93a70M2J31J32k2k2n1m9M2M3M3M3o4o5qqq4q5Q3Q3K2K3oon0n2P9Q0m0l9j2j1k0k2L5L4k1
-94Hk0P2P2l4l4l4l3lmN2N3q7q6NJ16J19j07j29j7J26J28j02j00oJ07J5k08j08J17K70M6j70
-95B4j70N9N9L8L8L9L8o7o6r5r5J27J26j15j17k1k2J10J10N0N1K2K3k9k8k9k9pqK1K0j13j13
-97a69J29J29k1k1OPJ3J2J2J3k8k8k8k7k1k1k0k1K5K5K5K4M6M6m7m8rqrrlmlmk5k6k6k6m1
-98a81m1J28J27poK2K1k8k9k7k9M2M2M2M3j09j07r0R8J30J9p3p5N4N2m0m1rrrrJ28J29K3q9
-99I2o9o8k0k0N0M8j1j23%J12R8q9o4M8R1k0r4r6K9K9N1N1O5m7q4K8J14Kj32j33J04J03j6
-101B9j7M0L9l6l7l6l7M0L8M7o7n9o0K7K6%jN6N5l7l5l0k9n3O0J90P8p3p4p2p4k5Q7J85kj74
-102c1j74J33J31j11j12O1J72M0p2kkk0j9O6O7q3j94l9J49R1k1k1R2N6j32j37k6M1M2M9M8
-103D2J6J6p7p7l5l4R7R6k3k1L2L4j%n6n6K0K0J8K0k2k1k3k2J49J50r4r4m8m7Q2Q3q0p9J3
-105b2J3q5q5Q4Q4Q9Q9p9p9N4N5kkj02j00O6O6K4K3l2l3KLKLK2K3l4l4j4j6P8P9o1o1nnj7
-106ij8j9j8O6O7o4o3N2N2m1m1J4J4J3J4j07j07O1O1N8N8N9N8j19j18o3o3J21J19K8K7N2N1
-107A95j10j09kJ10L3j54j01Q7J67j9j96j97J10J10J4J3m3m3OPJ00R9p1p0O1N9qrrqr9r9l4
-109b10J91J82m2j08j06NNR8R9o2o0L1L2MMMMr0r1q6J39R5R7k1k1q8q8M2M2rj1M5M6l1l1j15
-110a05J08J32r3k85o1J88J87m2m1L8L9j7j7P2P1j57j57l2J93J37q8m8m6L0L2j8j9P5P5m2
-111A09m2J4J5r6r7J08J09q3q2k7k7O2O2l1l1K6K5K6K6j05j07J24J23O2j62j61O3K3K3j8j9
-112h8L5L5L4L5L6L6j32j33O3O4QPK9L1L0L0m2m1J5J5m7m6M5M7klkll6l5l6l7O0N9l3l3P2
-114C7P3n8n7O4O5QRq0p8q0q0O0N9MLN1N0m4m2O4O5j03j04K6K7l0l0M2M2M1M2K0K1j47j48
-115b08J02J01PQL7L7n6n6R6R7l5l4l0k9l0k9L8L8n4n6m6m6m6m6J87J86n4j66m7J78N1o1L8
-116G2L8r4r2K4J37Qk16q3J42J41q2r7J27J27r7j16J07J08j17j80M4J72O0q8q8L6L5M5M5j1
-117A07j1n4n2L9M1o3o1ooJ14J15Rk14r4R5R1r5j41M6J97Q6j33j32K9K9K6K6K5K7L7L7L7L7
-119A88r4r4L7L7n7n7kjrqQ4Q5j23j24J56J57q1q0J3J3l3l1l2l3l7l7l7l7J47J47k1k2PPm1
-120a3m3j2R9J50l8j25j2OPj0rrrn5n5J50J51m6m6J1J0q5q5QQn8n9P3P3O7O9J2J1j76j77J05
-121a12J04J8J8J9J9n1n0M2M3K8K8k8k9n4n6L8L7K1K1p3p3K8K9K8K8K7K7k9k9n6n6L7L7M8
-123B9M9pqj6j7j10j10J36J34k6k6j9R4M9j39j14kR1R0o1o0mnK4K3l3l2nmN1N1k2k1k3k2j1
-124g6j1M5M4J7J7j06j07NJ19J59k7n6n5j2j2m7m8J88J90q8j99q0J07Q8k3m1m3K8K8k8k8L3
-125a9L2j5j6j8R4J45m3j69n7P3P4p5p4N6N6j00j01m5J42J35K3l4l3L0K9k7k6o0o1o1o0K7
-127a78K6Q3Q2m3m5J2J1L0K9k5k6K6K6K6K7j19j19J62J61K2K3j09j08n8n9L5L6K9L0J59J61
-128C07k31k29j1J77L7j49q8R8R8j2kkqj20j06Q1J65J65j1j1n1n2NMl7l6J9J9O6O6m6m6r4
-129c5r4R3R2llj14j16P4P4P3P4r9r7m2m2Q8Q7q6q7j8J69J68j8j33j31M3M3M1M2j5j4l1l3
-130e0P9Q0k9k9Q4Q3j12j11JJL2L4j46j47J75K86J26j36j97O5J94Oj90j89O1O0m7m8RQj17
-131a64j16P1P0P3P1m0m0P8P9l3l4o0o2N1N1p2p1M0M1k5k5Q8Q6l4l3P8P8n0n0n0n0L9L9p2
-133d8p3j6j5M0M1l6l6J51J52o4o4M9M8l1l2q6q8L0K9Q5Q6o7o5M4M6l4l5l4l5n6n6N6N7J5
-134d2J6P1P2q0p8L3L2k6k6k7k7J6J5J5J5%%N5N7r5r6J51J52j7k42j30R5O4O4P8P8l2l3l3
-135I5l3m8m7QQj5j6R4K07j9k42j95L0K14j1j20qJ62J63r3r3L0K9q4q2l2l2Q0Q0k6k4k5k5
-137g0n6n5J25J24k6j36r6J30J33K1q9q8J10J12jkp3p3j8j7p4p4J07J06M8o5j5R6L4p9p7L3
-138eK6q5k9Q3J39K8j03RJ03j0j38j37j7R6N9O0JJn6n5P6P6k3j33j02J1J03J01J5r7l5l5N0
-139b3M9m3m5k6k7L0L0M6M5j0j0O6O5Nj08l3P9J01j2j01j01K3K2k6k8L0K8m6m7m7m7J03J03
-140D5P3m0n7n6L0K9j0j1M6M6r9r9L6J48J39K7p2p2l3l3l4l2j9j8L7L7MMN4N3k0j31j04QJ09
-142a5J07n3j65q4J04J90Lr9j00R4R3l9l8J17J18o2k48j17P0M5M5N5N7m1m0j3j3O4O5k9k9
-143D2K6K6o8o7q9r0J11J09K8q4o8J56J95l1j59m6j4j5o3o3J79J79o4o3r6r7L5L4J18J19j2
-144A68j3o8o8l9l9%%%Jl6l5K0K1O4O2l0k9K1J9M9M9r1r0P6P8kjr5r5M1M0J64J65j38k49j14
-145a94J11R8j4l0l0RQL7L6K5K4l2l2L9L9r2r1q8q8Q1Q1O4O3o6o7M5M6J7J7m2m3J3J4O7O9
-147I4J5r8j75M9J95J96p6p7p7p6L3L5k2k1M2M4j3j3m6m4J0J1l6l6K0K1RJ0m7m6N4N4N3N4
-148I6m9m8l7l8j11P7J64N3j39j41J60J58j3k00p6J11Q9k3o6M4M0M1rrJ9K0J9J9o0o0n8o0
-149h7P0O9P0P1r8r6m1m1J18J20L0j57j33N3J71j5j78j79J66J64p8q0J4J4m6m5M8M8M2M0M2
-150G6M2j14j13k0R2P0j16p5J87K28l5j52j51N9N9LLl8l7l8l8J71J72P1j17j07j06M9N0k4
-152E1k4k5k3J%J%L6L7L6L7j43j43J8K04J38q8j80o8M7M7M7M7m3j55o5J61K52K8k11k10m3
-153b33J83O9m2r9J4J11J12J6J6p7p7m1m2l4l4J3J26J38q5j58m6J20J18M0L9n4n5m4m5Q5Q7
-154A21j56j56Q1Q0oj19J0K35Q4j40j93q1O7O7P5P3p2p3J26J26p2j83n5J69J67n7j47l6j3
-155g8j2P4P3K7j97j49P6J86P3r1r3L3L3k3k3N8N8l4l5p5p6J31J30n6n5L6J47Q8j36p4L9N7
-156A12n6n6N6L9p4o6M5j0j0J3J24J9k06q2J42K40J7k26j11K5K5o1o2J00R8o9o9K9L0L0K9
-157A5qpqpL0L2k5k4Q7Q7q1q1m2m4m3m4k1k1P2P3P6P7j28j29J19J18O3O3j15j14k2k1Q6Q6
-159I9m5m5K3K3j07j08L1L1J24J25n8n7n7n7P6P6q0q1l6J51J51l6j40j39N4N5pqM9M9n6n4
-160e4L9L7k2k4k4k3J11J12r4r3J%%JJ8J7J04J05n1j63j49L8Q7Q6l2l1j04j04K3K10J51l5
-161A37j88p5J08J07r0r0K6K6K6K6OPPPppM9M9o7o6j0j1r2r3L6J49J63o1k1k1OPPPK3K2n4
-163D8N7O6j59j65N9K17qk10r9J92J91q2q2NOOOM2M2q7j98j29R7J20Pr7r7J02J02J3J3J2J2
-164BL0L1o3o3OPO2O2M9M9j58j56R7R6j08j09O5O4O3O5k4k3k4k2L6L8L7L7m7m7m7m6J18J20
-165A97n0m9p4p3R4R5m4m5m4m4R3R3p5p4j07j07J00R9N8N9j09j10J19J20m9m8m1m2J4J5M1
-166A2M3q1q1nJ07J21j03j19pJ09kj21j21J54K65M4j43r3J9k5k5JJ12J10p8j33j34L8L7j9
-168a18j8M2M2R7R8j06j06j3j3J20J20m8m8m0l9J6J6N7N7N8N7j75j74j0J75J34n4j42M3J71
-169A99N8j11j10l4l2m0m0L0q3j32N6L20K08j48k60PJ93L0j56j38N0J64N3j4j4k1k1mnmmQ
-170ERJ02J03o7o6j0j0j8j8j9j7L4L4n9n8L5L5k0k0L7L8r2r4PPJ01J00O8O8k6k6n3n3LLo4
-171ao5K9K9L2L4o0o0Q5Q6m5m5L5L5L5L5m9m9m9m9o3o3O9O8LKLLn8n7P4P3o2o3L0L1Q2Q2q6
-173C1q5J9J8J7J9n7n8kkM2M2n2n2N4N4m0m0N9N7p1p3pqQ6Q5p2p4N8N7j1j3M3M4qpqqp0p1
-174a04p2p1Q4Q5j0rM1M1M0M1l3l3l4l4J9J8l7l7K8K8Q3Q5l5l5l5l4K0J9l6l6O3O5J0j00j16
-176a31J08K02k2k04r3J11J10j51j51J27K39Pk16n6J67N1j74j11J14J10kkJ10J6k08j60O5
-177a44K05j9j20j22J31J31%%Q3Q3j24j22j0rJ9J8Q5Q6qqpopol9m0j32j33J56J54j4j3n4n3
-178c9n4n4N6N6N4N6LKk5k6q6q7PPR9R8o8p0j6j6J2J2J7J6m0m0ONO1O1qro5o5O2O1j07j07
-179b31J10J11J80m4j30j30O1O2J10J11j33j32R0R1m0m0J8J8J7J8J2J2q2q0J6J5l9m1j2j2
-180i4M4M4o7o7K6K6N9N8LLk3k1L2L4K0J9l7l6RRO6O5p2p3j6j6NLq8q9L6L6J29J30n8n8n7
-182a6n8LML1L2JJQ3Q3J33n4k18k18LJ90J41m6r5J7R9j3q7q6L8L6n6n6L6L7L0K9JKn3n4J07
-183B7J08j29k41j4J73J28n7o8M4J18Oj28j30N2N2N2N1M5M4q6q6k7k7J03J04RJ0q5q3lkN3
-184A3N4l7l5N6N7K5K4j07j05k4k3J06J08m0m0l9m0L8L7L8L8nnonj04j05m8m9J26J25m2m2
-186e6N9O0l4j45m2J47J66k0p0o9J2J2n5n7L8L7l6l6P7P6j2j1j2j1p3p3M3J55J03rn2n1q5
-187b4q5k9k9L5L5R8j3p4p3R9R9J3r8j00J3L4L5L4L3P9l4m1P1R7j7j33j32L6L6j9k0J07J07
-188A40rj22k5Q5L1q2k3Q8K3j63j14P4J73j3q5q6J5J4K3K3k6k7l9P3P9l2r6J7J21J0o1o2N7
-189a9n5r1K1K00Q9j08j06P1P3n3n2MLL4L5L5L5r7r7Q9R0M3M3Jj12k42j31K05K03l6j48j5
-191h8J71L9j48j37N1J00R8jjl3l2l2l3M7M9J05J04j6j6j28j28m6m7J40J41j25j24O2O2l7
-192cl9J8J8N5N6jjj60j60j00J25J68J66q1q0nnN1N1k0k0k1j9L0L0L0L0l0l1l1k9J4J5J5J5
-193E1j9k0j9k0O3O4j23j24Q6Q6K9L0J9J8r4r3r3r3J69J68m4m3m5m4J4J4J5J4PQPQL7L8p4
-195cp4J5J5J5J6L7L9o0n9p8J46K0K1m0l8J7J6o2o3N0M9k4k4Q7Q9n4n3N7N9m6m6J1J0l5l3
-196b3P7P7q6q5K6K6l3l3J23J23M1j47j60m9l8l8O3O3K4K4l2l2M4M3M3M4N2N2m1m2q2q1Q6
-197B9Q7j81j83J29J28j6j29j5J72P3j13j10P8Q8k3m1m2M3M3m9n0m5m4J25J23n6n5L7L7n2
-198a2n4M0L9l9l9J6J29oj92p6J87J66r6j63n1N7N8O3O4q5q3RJ21J27o0p9p8mmQ8R0n2n2N
-200C4MJ1J0m6m5K3K2J6J6jj13p4J13J31n6o4M6Q0l2r2J8J15p2j53m2J46J44n3n4n2n2M1M0
-201IN5N5j13j13J50J50r3r3m3m4J2J2O0O1NNp8q0k3k3P9P8n1n2O4O3l0k9K9L0L0L0m8m9j25
-202a10R9J69N7k08k07l3J92J27J6l0l1J9J9j06j07m1J83K11j4j17j15QQRPP3P3r6r5L6L4
-203C0L5L6L4L5o0n9J9J9l7l7J0Rq3q4N5N5N4N6MMj19j20J11K22K0k06j87L7J31r5j23J03
-205a31J93Q1l6l5J4J3p5p4N4N6j21j22k8k8P6P6K0K0N2N3N4N3k3k3j39j40j15J11J78O6n9
-206B1n9j0j0L8L7L8L8o0n8mlo6o6J03J02K9K9K9K9q5q4k9k8N5N5N6N5r5r4K9K8l7j50k6Q6
-207a07R4j8mmrqM7M7N3N3m1m1o5o6O4O4l1l0N5N5l9j51p4J13R5r0q6J02J34K3j09j07mmQ2
-208gQ2O8m4j37k5P5P5q6q5OOPOJ00J02o8o7J01J01j05j05j0j2j1j2J13J14j2k00r2R6J34
-210A08K3j36j37j2j2Q1Q2Q7k4r8r9K5K6O9O9k4k4m6m8RRL7L6j24j25O1J73Q2j02k8k9R1R1
-211I1LLMLj05j06K5K5N4N4L8p5j59O5K38J26j12j12J3J2l9l8l8l8j7j6J14J15r3r1L9L8l2
-212a1l4N9O0n6n4%%P9Q0n1n1j02j03J01K12J05j21n7N5p5j86q9J36J51p3j61O5J48L7n5n4
-213d5K3K3J6J7k3j35m5J80J99k5j91q0K4K4L0L0qqj38j39J83J82k1j33n5J69R9j2p2p0QQ
-215A5k7j40j17J08K00Q7p8p8ppppN6N5j43j44O9J80N2j72p6J50J64N4o2o2j2j2p0p0J28J29
-216A56N2o1j21j21JJ12N7n6llL1p9r8J5J13J12K9K8Nj08j35k3P4P4J%k1k1r2K0J23J25j25
-217F1j25J1J22M4o8o8M3P9l5k0k1MMn2n3O5O3n8o0K0J32Rj03q1L1N8n1m1P3J58M6m6m7M0
-218A34M1j40j39K9K9m1m2K0J31O7m6r5J8P9Q1K7q6j12%qpm7O6J96Q5p7p7m8m8q0L3R9J01
-220A43j17j17k3k4N6N6PPp7L5J70J71q5j97o9p0l4P8K09R7j84j83J0J97J02q6j25j3k4k3
-221a13L9M0J5J5J4J6n3n3P8P7j0j1J8J8q6q5J3J24j6j28l5P7P2l8LLk6k5O0O1l7j49k6Q7
-222f1M5o8l2Q0k2k1J11K25K4k38j95J41J87p4j11JJ6j69j61J02K64P9q2q0L9L8r2r2P1P2
-223ck3k2KJM9N1L1q0j79RR0Q9k8k9O6O7k7k7J2J3m4m3l4l4l4l4M2M2PPJ13Jj03j04O4O3l1
-225f0l1J00J00l5j47j31j9J17J16N9N9l5l6J6J5m1m1J7J7M5M5k0k0p6p5M4M3J3r8p1p1N4
-226a47N3J6J6J5J6J4J5J3J4p9p9o1J26J94Q2j17j16n7N5jko0N1Q1Q2m6m5J0J1R5R6l6l6m5
-227A28m5J1J1lkn3n1j36k4J12J11l2j42j9R3P1m0q9K3O0O0k6k6O9P0k3j36q2J06K17J06j80
-228A39k92p7J85J96Rj08MJ00j3j79j79K2J34J34K2l2l2l8l9n3n4P8P7q9r0k1R0N0N0JJl0
-230c4l0N7N6J2j00j4R7J03rl3l3p2p1m8O4L6p7p6L6P1m1m6O7J62k5j81o9J33J31L5p8p0p1
-231a18J5J6Q9R1O0n3n1n0n9n8poQ7Q6n5n7L6J49M8j39j88jP7P6m3m3j3j3M3J55J37n0j02
-232E9J0M7o6j51m0J14J14m7m6K3K4o9p0K4K4l3l2R4R3j05j05m9O3N7N6P0P0o1j72l3J54J06
-233A23pj6j5M8o5j62n1Q6Q4onN0N0j19j21k2R0Q6k5j0j1j6j6l0Q1J75O2j11j11l7l7l7l8
-235a33P7P5J5r6m5O8J54M2j38j36K4J35J25o3j06ML9L9m8m6j5j5M1M0j9j9K9K9J4r8j26j5
-236a68P1P0K1K0K6K6lkp6p7J6J29R8r0j49L7J89Kj91j93J31K43J6j70j11P7J16Mo8o8j9k0
-237a13N8N7JKk6k7J%J12J13n6j67r9Q9J32K1k4k3L9p3j13kO0N8pqN0M9m5m5Q7Q6m7m8JKO
-238A01j05k0R2L2q0j29j7M7M6llO5O5k8k8J9J9l8l6m5m4Q7Q6q0p9J9J30N0o3q9K2O3m7l3
-240b4l4n7n7p7J12J84P2j32j34R0Q9R0R0m9m9p7p6O4O4r6r7MJ15J31n8p6p5NOk5k6J05J06
-241A08j12j12J8J9K3K3P9P9j03j02K8J40P2j15j42M5P3l8n5N8Q2Q4m1m1q9q9L4L4P0m1r6
-242a07R2K01J5j49j49Q1Q0j3j2J0Rj8j8J9J8J9J9p2p1j5j6P5P3n6n6J05J06j01r9M4M4j1
-243D7j2o3o5L0K9n0n1M3M4N5N5%%kjn8n7K0K0J9J9OOOOO8O9j00r9j4j5M2M1N7N8j12j10J0
-245e9J1q3q4Q1Q1j3j2L0L1N7N9l5l5o2o4J11J11j31j33P3P2n7j71m9J39J82P0l1l1r4r5N4
-246g7N5lkL6L7L7L6r4r3L8L6K8K8%%L5L6k1k1o5o5j0rK3K3onQQPQq1q3J24J22j02j03J03
-247a2J02k3k3n0n0k6k5L0L1L7L6j9j8l1l2R8J00r5r4J05K19l2k94j72J65K41N4j37j37RR
-249c4m8m7Q6Q5m4m5k5k5O8O8o4o5K9K9N1N3m1m0L9M1j5j27r8Q9J70N8o6o5K1K1l9l8N4N5
-250I1o5o5J26J26L9j86j85L9LKP3P2K4K4l2l2p9q0n1J72R3j32j53P1J34K2j05j07L9L9J0
-251g3J1P8P9q9q9O3O3l1k9n6n6P5P4l0l0O2O3n6n5m0P1J43q1j05QJ14J15m7m7q4q4M6M5L5
-252F3L5j33j35R7R6l4l4k6k5KKl5l6R3K04J76m9j85p3J9J9l0k9lln9n9N0N0M9N0N1N1j17
-254D2j17Q0Q0q7q8O6O6J2r9j14J12J03qj30j8Q0P9k0k1m8m8L7L7L7L7k4k4J07J07j06j06
-255B4m9n0K6K6K5K5L0K9L0K9m9m8m8m9j08j09J73J71J1J1J1J1m4m4k5Q7m1k28q4K54K32j05
-256A24k11k5J27J5p8L4J69j8k16k17J12K24R8r0j16j18L9J51J15p2j23j1K6q6p7J10J78r
-257E5j60m9J23J21p7p5n0n1J07J06P9j09j28j8J06oo3N0J18Qj53m2R9R9o2o2J09J10k1k1
-258A43q4q2q3q4R1R2p8p8J02J00o7o7J14J15n4n3K5K6j43j43J40J40o6o5J17J18j91l04q
-259c27L28J67j69j47P8O5m8l2J92J44q1j85L7O6O7k9k8k9k8l5l4K1K0j04j06O4O3L1L1L0
-261B2L0J17J16k02k02R1Q9llK5K5k9j41j35Q9Q7Q6ononR5R6p3p3r7r8lmJ06J06n9j72o0J64
-262c2J63o1j70n9P0P0n8n8J11J10K2K1l5l5j9k0k0j8K5K6l0k9L0L1o2o3J9J9J9J9N6N7Kj08
-263gq5J40J40q5j49l8J7J6M0M0M0M1j64j64P9P9N5N3l9l8l2l2R8R9j32j32P3P3j29j29L9
-264b33L9P8P7P7P7RQq6q4J0J1O5O7m9n0m8n0Q0Q0n1n1QPQOp1p2N8N9N1N2m2m1J8J9J9J9n5
-266A9n4P6P6p9p9J5J4J8J9p4p4L3L3k3k3onN0N1N9N9O0O0j78j77O5O5m3m4ONK4q8l4J89J70
-267A85n5j46l4N4N5l2l1o8o9m1J84K15j1j50j50m8m8M6M6P4P3k0k0J2J1O7O8rro5o5l8l9
-268e8l9l9J53J54n2n2qpj31j32N8J70M1j82j81M3K22K20m3m3r9j00l5l5R6R6N0N1q1q0M0
-270cL9M0M0m0m0l9l9k1k1J10J11llN3N3q3q3J0J1j9j9j9j9j6j4p3p2J24J22m5m4n5n6P6P5
-271C8j16j16k7J60K14K8j36j35K4K3K3K3NNNONNNNj1j2j2j0N8O0r7r6k8J60J60k7j54j53
-272a18P8J90L2j55j55L2J29J6j01J0O9P1r1r0N7N6l7l7P1P1k2k3nmnnk4k3L1L2m2m1N1N2
-274G0n1n1j07j08J09J09J5J5l5l6l5l6M3M3R8R9q8q6M3M3p5p7M7M7L3p8j6j6j9k0n5N8J4
-275a03J5PJ19R2k0j06NN0N0l7l6K1K2j08j10J22J21m0l9JJ14m4j55p7J10J10p8j03QO5O3
-276C9k1j9L4L6l9l8N4N5l9l8j1j0p3p5O2J73N8n5p8p7K0K1l6l6n8n8P4P4N2N2mmP3P2J2j01
-277I1j86p4J30J28L4p9n0O1O6O6k6j38j04QO9O7n8n7P2P3j04j06pJ06K1q9n5N7M1M2J9K0
-279C8j2j3p5L7J37J38k8j41j16lQ9k3j27j5J84J84j07k93j04J58J18o8o6M6J11J12n0n0j57
-280i6j58P7K63J49j13j59K7Q9k3j15j16K1K2J41J41J6j71j22O5R0k1p2L9O3m7m4J42K25l8
-281B75k97j86K1K1m3P0J85P3j00r9P9P9n7j68l8P5J2J2K1J32J05pj21j20r7J6J04J02N0o2
-282C7j90p8J25J25O1n1k9Q1R2k2n1n2j2j23p5L7J37K6p2p3R3R1o9o9j9R3Q6Q7p2p1p1p2R2
-283hR0R8j4r8r6K7K6k8k9K1J9J9r3p2L9J32K1m1l9M6M7j0rLMLLo6o7j2j1L6L5l9P2J37n0
-285I6j81NJ75O3j80j80J00J00NOJ0RJ0J0r7r9L3J44J12p6j36N0K11K5j40j38Q9R0j52j53
-286a89Q9Q9m2m3k5k6J05J05Q7Q6k20k19M7K33P3j15k0R3jj13l5J52R6r2j05Qo0o0k6Q7J35
-287I4n1j62n1J56J54p5p4N4N6K7K7o7o7MLj27j27P4P5J8J9OPn0m9J39J40j03j03L2L0L1L1
-288G1L4L3r3k05L5K96J79j57k99l7J45L3o6M4R4j8r7r7O4O3M7M8m6m6q0q1N1N0j07j08J73
-289g7J73m6m5m5m6P6P6P6P6o2o2L1L2n7n8n6n8K0K0J13J14q9q9L5L5M1p2o9J17R1r7k10r9
-291b11M7M7N4N4RJ1m5m5J24J26q1q1j6j8p4p3J10J09n8n8m7m7l5l5J7K04K03J6j36j35R5
-292C1R7m3m3j36j37J8J8P4P4O8O9o3o2PPOPN3N5p7p6j9k0P5P3p0p1j5j5Q9Q9Q9Q9m4m4j38
-293A5j37K6K6K6K6llN2N3n1n1L5L5P4l8o9o8o4o4lJ10J64N4q3q1K8K8K2K2M9o4j56m5J85
-295E0J86n5j68j22j1J2J3M4M4L6L7O9m3j41j41J9J31J2J2R8R8J0j78j42M5R1k0J6J29J16
-296B47p2j91p9J4J5m4m4M9N0M0L9N4n8j32k0J04rj16j17Q8J99kj14l1J56J18o9j20j20L3
-297a32L3L3L4l9l8K3J34J35K2l9l9jkj20qJ15J15n1j64o7M4k0j9o1N1M5M3rj0qj0K3K4Q0
-298A17Q1p2p3p1p2K2K1L6p7j15lJ70J70j16j14J2J98K3j63j13J49J22o5j16P0J40m8j99q8
-299a74L7L7L7L7O4m7n4N7J07nr8J3N3n9o2M9J52l3j90p8J03J03k8k7J40K8j77o6J82J83r7
-300A87k07j1J02Jj10O8O9o2o1P8J92l6k23j14P3J50L8m8m8n4n5K4K4j01j00J8J30J15p1l4
-302f6l4J1J0N6N4l1l0JJ14oj17m0J46J37j25k40n3J43J43M0M1M1M0r9r8j05OJ4J4r9r9L5
-303a96K21J78q5j99q8J13J12j37j39K6K12Q5j03j02Q5J51l6j50l8J01J03k2k2J7J7j13j14
-304a23P5P5P5P6j10j08j10j09J10J10N2N4q0q2N1M9L2L1k4k4j0j0o6o7N5N5l8l9K7K7o7o7
-305a80L9L8j9j8L5L4L5L5M8N0m5m4J42J42o2j74r7J25P8j48j48P6P6j48j36Q9J43L1o1o0
-306a24J01J00l0k9k8l0k0k0P4P3k9k8k8k8n1n1M3M3M4M2q6q8J80J80mk29p4L8k5k5k4K00
-307F7J52p3j50l9J27J28r7r8L4L4rro5o4N8N7N7N8q2q2k5k6j5j4j4j5J63J64K3k01j72N3
-309g5M3M2l6l7N6N6n7n9L6L4k3k4q1q0J06J05J05J06p5p5j67j69N8N7N8N7noonQ7Q8O0j65
-310Ij52P1J36J37l9m0m0m0m1m1N1N2q8r0M2M1n8n7P3P4n9n9nJ08P5j47q5K8R0k1k2R1J07
-311A01mj27j6P3P5q7q7R0R1m1m0L1L1L1L1J7J7p6p7l1l0O2O3N4N3m1m0l7l7J9K0l1l0l0l0
-312c3J9J7J9J9J%r2r3J31J30p6p4NNq1q2Q4J95Jk23j33K41K69j06k66m3J63J63o5o4K9K9
-314H9j40j40J04J02K7K7jjq2q2M9M8%Jr2r2L9L9J1J1K9L0Q5Q6JJn5n5m3m4M9N0N9N9j47j46
-315a24J5J5J77J77p9j89o2J62J18j07k67m3K07R4j08j09J50J51j30j30L7L6k0k0M8M7m6m4
-316d4J5J4M2M3J4J3q0p9R1R1k12k13O5K89J36r0j40Q2J12j14k23KJ04J03l0l1O2O3p5p3J9
-317d4J9N4N6jjllklK0K0qrr8r9O9O9K7K6j03j05K6K5Q0Q2j2j2m0l9O0O0p1p0j09j09J35J33
-319B0N5N4l9l9k3k3L3L4l6l6K1K0k7k7k8k7jjM8M7kj13j08Q0K13J02j31j29j3J73Q7j00k02
-320a18r2J46J44J0j02r6R2J31K0j49j49R0Q9L4L3K0J9p4p3M2M2P1P1r7r6l9m0j4j4M3M2r8
-321a12r9J08K20L5j52j00Q7J30n6j70n9P3P2K3K3k1k1p8p8Q3Q4m8m7J25J27j17k29rJ79N0
-322B3j35j12P6J63k2j25j2Q1Q1K0K1K0K1K4K4o9p0m6m7J21J21r4r3L7L7k6k5j57j57J38J38
-324d4M4M3l7l5N6N6l2l3l2l3l7l7j0rMMO1O0rrrj0l4l3K2K2R2R3o8o8J6J27Q4j04j42k9K6
-325d4K7O1O2M1M2r5J8J17p1j95j96J11K23J26o2p5L7%j13j36j36O5O4Rj05l8J49K04J8j22
-326a4rJ20J21r4r4L7L7m7m6M7M7k1k1J10J11j34j34kkj00j01O8J80Nj82n6J32J64k3j36k5
-327f2m5m6j0rJ08J08J6J5m5m5J1J0k8k8%jl7l7l7l7R1R1R0R2k1k0k1k0r0r1M1M0L5L6J5J27
-329A96J8k07k05J8J70N7MMRJ0j20j22J41J40J0J0p9p7N2N4L4L5K8K8m6j58j04J20J08j17
-330A1k02K1K12J00o7o6k2k2k3k2N6N5p4p6L2L1k5k5M3M3j3j3J21J22j97j95P8P8M9N0RQq4
-331gq5J73J74j07j07MMj57j58P4J87N6j66j32R4Q4Q3JJL0L0P4P4n8n7j12j13j9j9P2P2n9
-332f9n9J16J16j50j51J18L41L8j87j77M7O2m8q0q1Q0Q1KJk6k6N2N2m2m0J7J5r9j01k2K02
-333a8J15j08j70n8J09J08k6k7q3q3J68J67j%J9K0l5j45j07J18J03rm8m7P5P5n6n6n6n7R5
-335a8R3p4p3L0L0k4j36n8J68K22kj30j8J74O2j75j74l4J89Q8k5k5Q7N0j74j67N7J28J30j00
-336A01j00L1L0k5k6NNNNj4j3j3j3l3l2K4K4o9p0N9J71J09j17j39k7R9R9r9j00Q8Q7L1L2n4
-337F1n4KKK2K2K2K3OPq7q5P3P4n7n6n8n8k3k2P2J84R2k1j24j24k5Q7PPm3m2J21J21N3n9j13
-338Gj12J1J1j0j0L9L9nj18p8J10J97J1j11KR6j5j12j14R4R3l7l7J12J12j24j23K0J30Qj04
-340a8o3M9K1r2jJ10J04qj6j6k3k2O7O7L6p6j12j11j4R9J17J18q1q2J0J0j9j8m6m7m6m7J16
-341c4J15k1j31KJ13K1r1o2N1R9j3jkL4p9j24j3J16J16R0k2j28j27j5j4m3m3N4N5NNR4K09
-342B16N6j32j53L3P3l9n7n8rrL1L2Q6Q8j40j39o5J22J98Q7j77j75M0L9N7n3j8J68J19p0j74
-343b3J3Q2Q3r7r6J5J6l7l8P6P4nno1o1O7O9m4m3j2j3j2j3RRQRppqpJ21J22k4k10j25O2J27
-345A4J6j19pL6L5L0L1k5k4n0m9O2O2L6L6L6L5k8k9K8K7r7r7J5J4Q3Q4k9k8m8m9m7m8N1N0
-346Go0o1L6L5j4j3K0J32P4j13j18P0J76j1j33k1L0q1j60m8J44J43j7j7j7j8k0k0L7L6q6q7
-347a75K6K6KKKKl0l0Q3Q3K9L0k7k5L2L3L4L3j06j06POL7L5R3R3p7p6k1j9r3r3J69J69o9o9
-349A0o7o9n1n1J36J36K0K0kJ12k0k44j96K9K58L3q7q9O9O7J3J2O7O7j21j19J63J64k3k4n2
-350A61n3j64j65J00J00j1j22p2J54M8j76k5K01J92l1k14j03Q3Q2L9L9j7j7m0m0l3l3L6J47
-351F6J14j12k46k1J75J75n7n7N6N6k7k7k7k6K3K4l3l3r9j01Q7Q7Q9R1r8r6P9Q1l3l2j24j25
-352a71O3O2J02J03o6o6r4r5L6L6J05J07j37j37Q9Q7LKn1O0J10p7j17oj8j7J8J29R1r7k19
-353a65l3J32J30k7k7k6k7j32j33J12J11J7J8J7J8O7O8o4o2n6n7P5P4k5k4L1L1k9k9l0l0L4
-355d1L3k2k3N7N9N8N8k2k3j16j15O6O6o4o5J3J3O8O8RQq5q6j00r9J43J43J28J27p8j90j87
-356a99JN7N8N3N2MMn8N4J03q4j59m8J59J57j7j7j7j8p9p8k4k3o6o7O5O4R5R5L8L9p3p3N7
-357E5N7o1o1L2L2j6j6L4L3M3o9ool3l3m9O4R0k2k2R0J42L0j75j73l3P8P9l3o0o2o1o2J38
-358e6K49J49j88k92l0J20J19n0m9J18J18j07j07m6O5K8q4p8L5O8O6P5P4j37j37l9P4N4n7
-360d5J2J3O3O4o8o6J5J4j04j05m0J47J12jp7L3J57M6q6q5J05J06k9j43k2k2j3j2P3P5o3j75
-361a21n1O2P5l7l8P6J02ro9p0K3K2K3K1l7l8n3O0R0k1L7L7O6j21k51o5J51J50m2j56K0K06
-362D2J26j38k35j1K25K26K3k02k01K3O2O2j6j7N1N2m2m1n6n7R8R7O1j62j70N4K95J84j38
-363A95k49m9O3Oj06q7K6J1J1J12J12J8J8p1p1R6R6l2l2l2l2l2l4l3l4L0K9k6k7J8J8P4P3
-364E9RRm8m7k3k2L3L3K5K6j05j06M4M3M4M3M3M2j3j4N7N7K2k03j85p3R3R3lmmlJ39J41k8
-366A74k9r0q9MMp3p2J34J32n9n9n9o0O6O6J0QJ9J9l7l6J3J3J2J3O5O4k9k9l1l2l1l1k1k2
-367g3J35J35Q8j00j52l8R9J01j37j35L6L6n8j70kJ87J85jj54m2Q8Q9p8p8k2k2P6P5n5n4K7
-368a4K6k9k9N9O0j34j35rJ79J28n8j27j6M1M0MMn2n2J52J54q9k02l6J50O3j25n4J31P6j10
-369dj15P3J11%K3K3m0m0RQp0k59o0K77K76o1j82MJ47L4p9p7OQM4M3K5q7j53L4R5r2j25O2
-371a42J88Jj79o8J76J75o2o2o2o2M6M5M5M5L6L6j29k39j02J61J75j3r9J2O9O8j6j6rrr9J3
-372g7O1O1k3k2j6j5k5Q6R4j8p2M1Q7j00j75J1K19J07j55j54K5K5QQPQmmO5m6q9K2K02R1j27
-373A06j25j4j4l3P9J35K4j28j27J26J28j31j30J4K01J11p7j36k2R1R3m1k27j70R2K25L9r2
-374cr3Q2Q2j16j17QJ20N1N1m6m6m2P0P7l5m9O2O3n0q8K3J27o0j43M3K26L9k11r7Q8Q9j05
-376@j04J52M0j74o3J92J92j48l35j22J40R5j7O2O3L8L9L9L9r7r6J5J6o6o5J22J21k9k9K8
-377D8K7n3n2N9O0k1k1J54M3j85j83P5J87j9j31j9R2K4q7L7L9l8l7J37K6k38k38N0K38R7q8
-378a7RJ20L7j49jJ11L1j55m8J38O2j24j19O7J27J6k1k2j06j06L9K25J14p4q3K9K4q8l6P5
-379G5J4j71j66K2J40J40L3L3k1j32p5J12J21o7j31k0J39K7j57j58OJ17J24J2j9R1Q4k7j40
-380Fj39M0M0j07j07J50K62P6j88j36M9J8J8K2K2K5q7l9P3j6j29n9J28O9m4l9P3Q8k3j27j6
-381i7L6L7p0o9L4L4L4L4L7L8J01j1j05j04N6N6qrM1M1qj20j1J76J24j37j72o1O6O5k1k0k
-383a5lM6M7Jj11j11%J14J12j5j27j10KO3O3L1L1Q0Q1l4j46n3N9m0m0R3K06K2k41k39K2K10
-384bR7o5o5j8j8JJ12J21o8j48l6Q4Q3K8K8k4j35j37k3J13J12j0j1KKn3n5J7J6J6J6J7J6J8
-385C1J7m5m4m4m5J8J8O7O7Q7k5k5k6rj22p3L9J11kkJ10J32K0j53j53L1K9k4k6M3M5m8n0L1
-386b0K9r9j01J94J95m9m9j0j0j0j0K5K6o9o8J17J18o1k84j42Q3K41J29K8q5j44j46o9J56
-387h5J62o2q5K6J05pj17j17Q1Q2N5N5p5p4j6j5J53J54r3r2JJK4K4o9o9N2N1mmm3m3J2J3J2
-389gJ1J1J2l7l7N5N6p6p6N5N4O4O5l0k9K0J9l6l7j0j1M6M5o4o4j0J01J42q3q0p9J4J6j14
-390i4j16J83J82L6j89m2O8P7j47r8J28J27r7j46P7K01k4j52m2Q7Q8j57j57M9M9N0N1M9N0
-391I1r6r7P1P1j8j7j6j7o3o3J63J64K2k40k56o7J57J57J%l7l6R4R4q9r1J40J42oj93p4J12
-392CP5j12j08Q0J10jn6n7N0N0N1N0j09j08K1J34O2j26j25O2J17Nq7q9K8K7K8K7M0M0L9M0
-394A61p0p0j4j3R2R3j13j12O0O0p1o9l1l1J00R9k0k1k0k0r3r4L8L8J34J35p2p1j15j16J5
-395b11J5Q2Q2K6K5kjjkqprqq3q3Q6Q5OON5N5K1r2j33N4Q7Q8L6L6o9j80j04Q4J72j5r2K0N3
-396G4N2j09j08P2P2q1q2n4J71J71n3j83j83N5K80J29r6j12Jk2k3%J12P8j47k33rJ60J58O
-397I6Nk0k0p5p6J24J24m4m5l6l5l6l6M7M6rrK2K3l4l2J5J3J5J4R1R1m1m1j33j32P3P3j2j0
-399do8o8P4P3J8J8j4j3j4j2k8k8k7k8J2J2O1O0k2j33m3J80J60o6q9K3N1o3j85p4M6M6M6M6
-400e3L4p9j41Q3J53J51p7p6K3K3K4K3L0K9j02j01K5K6j36j36J25K37J02j23o0N2lj15r0J36
-401a6J20Rj32j33J04J03j9j8j8j8N1N3j15j15J02J00o5o7Q2Q3m8m7J2J3m0j53q6J40J62N1
-402I5o0n9j1j1J29J30m8k72j62O4K30J18m7m7k6k4J4J6l9m1J4J4O9P1j06j04j1j2O2O1L3
-404D0L4j7j7M0L9kkkkp5p4J9J9M5M6q5q4l2l3O2O2n1n1M3M2J27J27p9p8o0n9mmnor9r9jj
-405b77J68J67K9K9k7k8l5l3ppK5K5o7o8N4N3jkM3M4m7j59m2J83K75j01l29j05K07K06n7j69
-406e3m1J84L6j87k0K04J80m6k45j9P6l6j57j58J23K35J00j25j33k2onj9j8J50J50m4m3m4
-407A7m2P8Q0j4j4k1k0j12j14J30J29L6L6r5r4l8l9J13J13n5n5r9r9O9O9j9k0L7L7j8j8J0
-409c2RO0O1NNn7n5j%L2L2k1j33j60O6J75J74kln9n9o0o2L3L2q0q1N1N1qqM8M7j5j5P7P8k5
-410A00k6n3n2N2N4K5K5o3o3qpJ9K1l5l6K6K4N3N4p9p7J27J28r6r5l8l9j3j3LJ15O3j60p5
-411a39J49J88l7j36k3Q5k8p6L4L9L9m8m7NOPOj0j0rj0j9j8m0P3J08j14k10J6J68N6j10j10
-413b15ppM9N0J60J61j21j19N7N8JKj17j18J0J24J24r8j23j1J38J37r8r8O8O9O1O2o7j78j18
-414a64J06J35K4j05j05R6R6l4l5l5l5l6l6J46J46r7r7L1L2L1L2N3N3p8p8QRQRN2N2j13k26
-415a55n8J68J66n8r9J3R8j4j19pJ27J29j14j13J7J7k7k8N5N3L8j49j01Q7J93Q1j26j24J6
-416c4J7J6J6J00R9j37j36K1J33J0j03NJ17K9j59j04RO5O3m0m0N3N1N0M9m4m4k2k2q5K8R6
-417E7R7j32j31K8J40N4n8mJ09N7j31j57m6k1k0J9J32M4o6j04RJ43J45o9o9o9o9lmN3N2J5
-419AJ5J6J5M0M0q4q3K5J36N1o2n6N6N7n6j25j4J10kj13j15M8M7M9M8J12jk22k23N2J63N1
-420b4j37j37N1J31J9j00J2J30J29l1j43q7R9J06nj59j59J14K26J29n9j04RK5K4k5k6QQm8
-421b4m8J26J27m1m2n3n2LLL2L3o1o0O9P1k3k4j11j13J9J8J82J82o1o1o2o0ooM4M5M5M4j35
-422@j36P0O9RJ0L7L8q3q2J0J1k9k8%%K2K1K2K1l9m0r7r6J81J79J17p0j09j08M9J60O1j26
-424D4j53L3J53M0j26j28j4j5Q0Q0K4K6o7o8J34J35l3l3M8M9o9k55j29K09K84K4k19k19J21
-425d4J20j8j7j8j8P1P0k4k3j16j17R0Q8J0Rq3q4J05J07o3o2l4l5N9N9k5k4O1O2j2j24o8M4
-426e4M8M7j6R7Q6k7j62j61P7P5m6m8K2J33J34K2j37j35pJ04J9r3o5M7J12Ko0n9N2N3p7p8
-427i5J17J18n5j67o1N2RJ0M3M3m9n0M5M4j1j24k5J61J83mj13j12k3k4N3J64Q3j05k01r1J16
-428f9J15O8O7P5l8j78j78N8N9l0k9oJ06M5o7L0L1l7l6j9R3N9j27j77J0Q2Q2L0L0Q7k5j94
-429h3q2J25J23m2j53m8O4k7k7M0J53K8q2p1M1O4O4m3m2m2m3K8K9R1k1r5r7RQJ10J08%j12
-431b5q9J35P3m0q5K6J30J9j00r8NOQRQQm8m8J25J25Jk24j69N7J44J42M6M5q5q5q3q5L5L5
-432h2L5L5J19J19o8o8j4j5j18j20L9J51J17j08q3J41J34r1j37k5P9l2o9M2M8o2j76M9K41
-433H1J29j33j32k8k7%JJ80J81j55k67qK17J76m8j64j62K0J32J46p8k03r2J69J68m7m6N9N8
-434A27j5j26j42Q4J16Oj04j05P9P9K2K2m7m9PQQ4Q5k6j36l9J86J86l8k21j08J43J45o5j76
-435a8o4M8J3J3J8K0j07j08QJ22Q1k9K1J34Jj86j21J41J33n5j82p1J04J02klk4k6m0P3M2p0
-437c2j61K6K00K02j19k31o3J98J50l7j15j13j4j4m4m4J36J35nj17j3J00J08mRJ0j06j05l6
-438i9J50J42m5j12JL2q0j23O5J59M7j39j40O4O4m9m9J8J7J7J7%jM8M9N3o0j71o0J43J42m2
-439E8j53n8N5N4n7q9K5J34J33M2p0p1M2OPr8r9J0RJ15J14O4n0j60m9J25J27J6r6j44l3J0
-440h1RL7L5L6L7o7o6K7K7P1P2r7r6R0R1p9p7mlQ9R0p7p5J6J7K8K7k8k9J2J2m3m3J3J4J3J3
-442A1NOn0n1M5M4q6q7P6P5n6n6J04J04o4o4N0N1onjjn5n7J2J2K0J9OJ19P9j08j69J7J05J07
-443A51j15j14J6J6R4R5l6l7jjkjn6n6n6n7N5N5N4N5O7O6k7j39r2R4J70N7o7j80j29j8P5P4
-444A0j11j13j8J70J69j8q1q0L8L7J5J5J5J5k9k9K7K7L4L3n9o0m1m2m2m2J8J7P4P3M5M5m9
-446F3m8o9p0O1O2j8j8p4p4P4P5J30J31m8m8m7m8P6P7m8m8r9J2R0j34j93L3J24J1j35j36J39
-447a97J38O0O2l3l1q6q6J94J95j10j10N7N8lkj0j0m8j60o3J62P8l4p5L7L9M0rj0k1k2k0k2
-448d2L7L6L7L7j8j8p3p5opopk7k8J04J03J4J5m2m0M1M2L5L5p2j83n5J68J82m3k47j34J25
-449a12J25l6l6Q8Q9j18j16K3K3M5o8o4J60J12j13j52P2K00Q9j59j58M1M0j2j2j2j2K0K0P5
-450D2P6m5m5j7j6k6k5O4J79M0j84k71m6J72J72n8n6O2O4L5L5q8q7o0o0j5j4P9Q0J4J6p7p9
-452a39J07J06J4J3p4p3N6N7J2J1J2J2l6l6M4M3K0k04k33rR8R8J7J8P7P8r0r1M8M6K0K0l3
-453Il1l3l2KJJ25J26o3j74m6J77J56o9r7r7L7L5n7n7R3R4j11j12rrM7M7N8N8KKl6l6q4q5
-454a69K3J35J69n5j18j20lkJ4J5P1P0o9o9R2R1j5j26m0P2O2m9r9J4J15J16p5p5l4P8L4p7
-455b4j31N7J79J81k8j40RJ0j03k14j05J58K36N0j05PQ5k7j13kR5R6j03j02k0k1m9m9J63J62
-457A52K6q5n0O3Oj06q1L0J20J21o2j75r3R5J54M3j26j25Q0Q0j4j25p6J10J55M2j03j01q0
-458a25L3L8L8m9m9N2N2mmL2L3k3k3M2M2n2n1M5M6rj0N2N2m2j53n5J31Q1j07r2R3J18p0j35
-459g3k3R6j7n1n2P2P1l2l3R0R1k7j38m6O7qpk9k9M6M5j1rJ00J02O6j59j48l8J28J29r4r2
-460a3l8l7L5L5k0k1N9N9MMj8j7j8j6lmm5m6m0J84J85m0k11k13R3R2P5P6n5n5l4l4N9N9O7
-462A08O8k6k7j01j00L0L0k6k5O9O8q1q1N0M9J4J3m1m2K4K5K3K5q9q9J09J09r4k08K4K48K50
-463C06j25k70m5J57J58p1p1RQq3q5L7L7L7L6j3j3j2j3O4O4o7o6nnM9N1k3k2k3k2n3n3J52
-464B5J54p9p8k2k2J5J4J6J5q6q7PPmlJ85J86n0l12j66J72K59lk16j04J26J25lj15j03RP1
-465f7O9n2n3n3n3L6L5R2R1r8r9jJ12Q4k7j13kO7O5J8J7j3j3o9o9K4K4K5K3L4L4L4L4o3o3
-467A0poKJKKm0m2M5M5K1r0mJ07R8j3j80j80p0M2J40J39Q5k7k0k0rrrj0L9L9j7j7O1O1p1p0
-468B8K0K0Q3k9j47j47j8R4P3m0l9P2J47L4j39j38K3K3K3K3m5m4n2O1J06J04j8j9n5n4n5n5
-469a60Q3Q3Q3Q3p0p0K4K4kkj32j33Q0Q0P9Q0k9k9q4q5J39J40k9k8m9m8m8m8N6N6p4p5N5N4
-471Dl7l9p6p6k0k0J65J64L4L3p9p8N1N2j7j7j8j7Q5Q5j59j58J83J85n9o0n4n3KLM3M4q8q7
-472g9m0m0m1m0J11J11k0k1J46J47n7j69m4J80R5j31j03J22J16j10j78o6O2O2k0k1L4L6oo
-473C0onM3M3q9q7L2L3L1L2l2l1l3l2mnmmK8K8K7K7%%j%l0l1l1l1N7N5N7N7l4l3K2K3j18j18
-475a34N1N1RJ0J0RL2L2k4k4j2j0J18J20j27j26NMJ20J21m8m9q4q3M5M7RRRRK5K6j06j05J5
-476d6J4J5J5j06j06O3J74J49l8r5r3O9P1r7r8L1L1L2L0LMLLR5R4j07k18o6J96J12j49k51
-477b66J2J55M3j7j6P1O9m0l9J28J28j45j45j4j4L7L7r4r4L2L3Q9Q7n1n3J16J16j04j03K7
-478a5K6M5M4q7q6J09J11K1j67j58K9J42L1p1p2R0Q8j01j02O6O5n0n2O7O7Q4j04j73o1R8R7
-480a9pqo9p0j14j14Q8K76J70j7j98q6R5R3M8o5o4M8J24J25n6j68j25O2J24J2l6l6O9O9m4
-481A07m3O2O2k8j41l5P6N6n7m2m2N6N8JJrqo5o3J4J4l5l5m4O8J4j73j84P8L12K00l9j51n3
-482f8O0R2j9n4n3qJ04J06qj78j79J46K58P7j85j91nJ26J27J5r9l2l2J6J7j17j18P4J86N7
-483A15n6n5N6Q6k6o9o7k9k9P6P6L2q1j8j6LLo6M5L8p3j17P1J62N0o3o1O2O3j17j17N4J65
-484I7L2j54q3J04J03q4j68J9K26J14j00j01n0n2K5K5K4K4m5m6O7O6j18j18J44J43r2r1K1
-485f8J33L1j55j00Q8J09kl9m0L7L5p5p6M3M3M3M3L3L2k3k4o7o7J19J19o3o3N0M9m3m3OOm2
-487B9j54r1R6J24J2k4k6P6P7K0K0j67j68R5K06l1k18j24K13K45j6j73n9M6M7n7n8O9O9m2
-488C6m2l6l6P7P6j4j3j4j3MMn1n2M0L9p2p3N5N5R9J00P6j12j74J3J95Q4j78j78J05J06o7
-489C9j80J0J22K8q3m9O3ppJ9J9L6p4o2J25J29n7k06j9J75J75p2j84o1N1R8j4o2o4n7J31K23
-490A85L7k65k66O0L22J88j50j95O5J80oj29j28j8j9L8L7Q4Q4rrRJ0p7p7l7P5J42J43j11j10
-492E3n0O3n7j69j0J77O2j24o9J18J17o9j24O2J65k2k23l6J56M4q7q7M6M7j22j22Q2Q2j2j2
-493a21jjN5N6K0K1l4l5K6K5J9J9l4j45j16J47K97L5k32k30J50J49m9m8Q3J95Pj82j48L7J5
-494b0J4NNNOp2p3J4J3P5l7r3J9J08J07q3q5M4J55L2q1r1K0M3M3M6M7j53j52J4J26P8l5o2
-495a8M8M1p0j7j9j8j8k4Q7R4j8o2N0J00j3j18j17M3J56P3j15j25j27J8J30J29J8j34j35L2
-496a29J43O0n2n2O0K1r0q2J06J70j7j68n7K6K7l7P4J19Pj66j67N4N4jkM9N0m4m4L8L8r3r3
-498a98J09J08k5j40j3R8R1k1M5M5j9j8J6J5j40j42J9K06Q2j05m9O1N8n5k0R3l0j40j03J59
-499a3K03J6r8r9m6m7K0J31J09j16o4M8J11j13j38Q7K78N4k09k09K0K0J7J6l9m0N5N3N5N5
-500A17r0q8J53J54r5r6mJ09O1j63j49l6J02J02k2k1k2k1P2P2j03j02rrKJKJM6M4rj1N5N6
-501I9p5p5R6R8LLr8r8O9P1o3o2o3o3j2j3Q2Q1J04J05j38j37P8P7K2K3n0m9m8n0Q1Q0j1j22
-502e5o7J58K07j7j25j24O6O7j00j00L1L1l3l2K1J33J63o2j64j65P4J85R5j30k31qJ71J70
-504A59j0j0j03j03K1K1P7P7j24j23Q2Q2r2r2J14J12m3m3Q8K01N9j29j73n9m3m3N8N7k5k5
-505c2k5k5RQm7m8L0L1Q6Q5n6n6%jm0m0J6J5O1N9l2l3n8n8L6L7NOJ24J25o1k48j43J94J94
-506A18o8k18l0J36K3r6J6J61J62p5p5RQq4q4L6L7n7n6R5R4Kj10j8J69J07q0j46j47M8M8k
-507g7jkjO0N9O0O0j16j16Q1Q3kj14j57L1J49J49qqj02j02rqL2L2L2L2p1p1K2K3mlmlj4j4
-509a02L5L5Jj11j05Q3J71N9O6O6R0r8j57m3Q4k9j20j0J37K6p3p1N5N5j12j14J30J28p6p6
-510g6N3N2N3N3p1p0j5j4J1J1J1J0J37J38j07j06L2L3L2L2j45j43K4K4N5N6l7l7k0k0k0j9
-511h3J8J8J10J12q6q6q6q6P8P9O5O7M3j44k00j3J75J73r5r4O3O5l0k9j1j0M5M6r7r5klK1
-512g2K1K1K1M9N0j10j11Q8K01Q2j06j22rM6M7j5j5l4j45j30N8K14J02j43j45N5N5j2j2j9
-513i0j9J19Qq6K7O1O3r8r9R7R5K9q4m8n0j%L4L5L3L5M8M9l8l8o3M9N6n6j21rJ51J52J4j74
-515H1j30j9K6K7k3k3j12j12j9J69J78O5o5o4J1J1O0O1L9p5j71j72M3J56J56M3o5o5j5j6P8
-516E8Q0j5j25j62K5J20J18p8p6K1J32L5p8p6L4J7r4q8K4N8N8J09J10M3j44j50L7J35K4p0
-517H2p0J3J2O3O2mj16j13P3J16p2j17pR2k0j13kQ1l2j68K0K20J09j27j28P2J83N3n9kko5
-518C4o5j0j0j0j0j7j7q8K5J59M6n1n1N0M9j17j19P9P9r0r0J80J79n5k41l7K24J70r3q9R9
-519A13R0r8r5J6J7r5j21O6J84P4j06j04K4J35R7j6p7p7l3l4N2N3K6q7q6K6M0L9rj0Q4Q3m8
-521A23j60p0J16J25J2j16j15o7o7Q5Q5J47L5r8r7q2L1N4n9n9N3R7j5j03J1J16J14j12j14
-522a30K7J38M6o7n5n7ppJ65J66m5j57q5K7Q7Q8rqo5o3J15J16J7r5j17mJ8J9k0k1j9k1K2K1
-523B0Q5k8j68j69K5K12J52l4j49l7M4M3j07OR5R4l0k9P3P3j64j63L0J41J7r3l2Q2P3l8k8
-524dk9N7N8J7J8J0J0l5j47j46M2K12K5j63n3J49J49j24j24L8L8q6q6M0J52K2r0K1K0m2m3
-526i4N6N4j38j38M4K32J08p9n9N2k2k1R3R5p5j86o3J24Lj85p8J85J37m9n2N9N6n7o2N0oj19
-527a35k9Q4M2j46m9K14J57j05j84LJ87P6j%k2j33m2K20K21m2k69j56M5M5J7J5Q7k5j37k6
-528h8J10J10n4n5P6P7r4r2l8l7O8O7M5o8j08KN9n4j43l0J74J73j9j31K6J37P9j09r0r0j1
-529a08j1j2j1R6R4O5m7q4q4LLl8l7L1J42R3R4l6j48r7J4P6P5j5j5pqk9Q2P5P6j09j08n2n2
-530h9K7K7M0p0p5L7J65J66o4j76j4R7Nj06o0J26J37n1k03r0P1P0J5J4R7j4j83j83N1K37J89
-532A93P7rj21j89j89j9R4Q6Q6N8N9j03j03N1J61M4j45j31k0L6L6N7N8L4p8o6M5M6o6m3O8
-533GO8m3r2J9P5l5p0M4J29J7q6q4QQj20qJ97J99lj91j89lM6M7N8N7O3O3l0j44j20O7J85J86
-534C25l0k17j74o2L3L3M1M0m6m7k2Q9J48L6r9k12r0R7J79O6q2q2k2R1J21J22pj19q9K3P0
-535A14j17k25l8J94J93L7p4j2j1j22j23M6J58N1j36q1J07M3o8o4M8P5l8l7P4L7p4o6J21K74
-536B86Q7j90j89j3j4j01j01M4J57jj13K3K10J16p0j33k2L4L5j5j6j4j5o3o3O8O8noonJ6J6
-538EJ6J6M6M6p9p7N8J71O2j64l04q1J91J91o3o2o3o3P8P7P8P7j51j50L6L6j6j7p3p2J53J51
-539E3M1M0j16j14P2P1L9L8p3p3O4O4m8m8RQQQJ1J2m5m4l5l5P8P6l8l8O6O7J9r4j63O1J12
-540E3Jj69j70K7K51J95l0j45j45K8K8Q1Q3k9l0j3j3j2j4R2R3r4r4J4J4m1m2N6N6N7N6m3m3
-541E8m3m2Q3Q4L0j93j86p3L8L7R2R2k0k1L0L0Q5Q6j1j1j23j23N8N7N8N8pqj12j12O6J78O2
-543A97j63r7J4O2m8KJ12M9j39j07P9J38K6l1l0L3p9r4J7J27J28k8j41q3K8L9M0j32j34KJ15
-544i8P1m2l4J53J54l4j42k9J3J5r1K0J32K0q5q4R4K08N1j37k00q8P9P7R3k0K1K1K8q4j17
-545c5oJ10J11l7l8q6q6l2Q1Q7k5j49l7J54J54j31j30N6N5m6m7nJ06J03j0M9M8J2j77j82M
-546a29Q9k4j24j3J24J23o0j73nJ07J00j2r5r7n4N8J17J16J2J1m3m2m3m3P5P4L3p9r8J4P0
-547a1m3l8P5O7m5K2K1L6p6j38Q7J48p5j85L9K04R3j61j59L9L9m6m6J1J0L9L8L9L8popnL7
-549C4L8j9j8j06j07J06J05j3J00J71n5k95j84J67K79K6j99p2M0n2n2Q4J96O6j58j58O7J29
-550A20J8p4p2l8l7Q6Q7Lj10n6J68P8j46j46P9K38J3j90p6P5P5q5q5K7K8r7r7J22K33R7j27
-551A11j93q2M7M8OOOOK0K0l6l6n6n6J12J12j9j7p5p5J31J30l7l7j6j5M1M1m8m7m8m8M1M1
-552b2M0M1p8p8k3k2L7L6N1o2j14jJ98J98oj94j06Q0Q6k6j12j13QJ21J20Rj06j06k0k0Q2Q2
-554b0Q0Q2r3r2o2N0J3J2M3J55N9n4p7p8l1l1l2l2N8N6N7N8K9K9r4r4l0Q3Q3k9j20j22M1J52
-555D9N6j31j39k6J31J31o1n9j7R4J44m3j24j1P6l5j20rJ57J58r3k05m9J38R1k2j8R6M4o8
-556A35j28j28j1j0J09J08L2j54j11P7J63k3j48j50J5J4J4J4J21J20p7p8m4O9R1R2j3j25q6
-557a12J02J77qk40k41Q9K02P0m0N5N6q2q0RQL7L7J6J7kk26j84J91L35J12j84j83Q2Q3j8j8
-558F0J0J0QQm8m8N6N5%jj02j01J41J42q8q8M3M4p7p5N4N4n5n4L8L7M0M0n3n3J2J3J3J3q8
-560d0q9M2M3OOn0n1R1Q9m1m1M5M6j1j1R3R2j52j50P8P7K2K2poN0M9j37j37poQ2Q1n0m8op
-561c3J24J25o7o7l9l9rrJ7J9q0q2Q8Q7lkN3N4o3o2l4l4J09J10j33j33N0N0opj09j10J35J33
-562C3m6m6J0J0LLN5J70K7j98k45k2J73J72n7n6l7l6K0K0R3R5j04j03J5J27P4j50j13J11R7
-563I5j5j49l8K4K3q8q8J56J55l7l6l6l7K1K0M7M9l3l2O2O1j2j2m1m0r4r5l9l8J41J40J0J0
-565E4m2m1J4J4O0O1l2l3o4o6J02J04lkr6r5KKN8N7j00j01O8O7K4K6l1l0J16J16K3K3j54j53
-566e2J5J4n6n7L4J46Q3j41p9L4Q2k9n3n3N0M9M8M9j08j09R8R6RRm7m6K4K6o8o8llJ20J21
-567A35qj20l7P3M3j44j36J27K12K5j71j72K9K9K9K9J35J35p5j87j37k5L6L6Q8Q7R4j8o6o5
-568a9j6j7j6j5P8P7kkjko2o1O2O3n2j62q2J06R6j6L5J47P0j92j45J17J86p5k71j0J86P5j89
-570a09p8J90J92q2q3k5k5j19j19J83J83k8j39L9J50j7j29mJ07rj96l2K30K26l7k39j26L7
-571e9L8rrJ22J23q5q5k8k8%j%%j7j7O9P0Qj03j04RK3K4L1K9M1M1L3L4M7o6j64j64j4R9R9
-572a3j3J3J3OONMNNq4q4l3J55J89Kj91j92l7P5J36J35R1k1k1k2M0p3j03j03Q8Q7m2m2O9O9
-573A19n4n5k4Q7Jj11j1J01Qj04r3J9J2J3M7J59J62j00k17l1J16Mn5n7O7O7j10j12J58J58
-575A64pj94j08Q0Q8k3M5M5L5p8p7L3O1O1O8O8o6o5m3P1O2n0j11j09j04j04R8K09J40j22j40
-576g3M6J95Rj80o8J21J23j3j26j38j39m7O5R0k2o8J18J47l9k28j17J82J81j22j23P8J89m1
-577@j54OJ93Q1j07j2J01m0k26r8J65K22L6l8l8POmmN9n4j5j5M2p1j36j37j9R2J22J20o0n8
-578c4N2N4Mj07NOn1n1mJ08J57l0j10%J01j1q1q0k5k5k7Q6R1k0p9L3Q8k4j92q1J79J78O3n0
-579A23r2r1j48l6J64J63o5o3M2M0m7j60k2J66J63N2o0o1p7p8L4L5N8N9O6m6j66j67K6J37
-581e1rrR7R9j0j95o8J93J52j12j71J6J73O2n5j66j31j9R9K10N6j31j35N1R7q9r1R8K13K7
-582B01j93j92P2P3P1P3mmn9n9L5L6p5p7rj0rj0J03J01j59j60Q8Q8J30J30J3k10k68m3K21
-583a06K21j01j01Q1Q0r8j00O3J74N7j67j13kL3L3M2M0j4j5N6N6n6n6M2M2j4j4n0n0O1O1o0
-584B5n9o0o0Q6Q4L0K9o5o5M7M6o0o1k5Q6N3j70j71N4L29K18j16k27k8J95P7j48r0r2PPJ20
-585dJ19j35j36R4K05K1k03k3K00J74k02k49k6J57M4l5P8P8l5j30j9K4K3OOR1j34k38j3J84
-587g8J83r5r3J7J8J0Rm6m6J20J19m9m9n8o0n3n3R1K03J22o6j38k4O7O8r6r5L6L5K7K8j03
-588d9j03N5N5Q3Q3M8M7m6m6NNNNj08j07O1O0j17j19QJ95K27L9j62j61M8M9ppJ4J5l5l4mJ08
-589A10J01q6r4J9P0m3j95q4J28J26j7j8j7j6J8J9j37j39L5K20J35n2j15lJ6J6K7K7N5N5q1
-590H0q1M9N0j06j08K3K4J2J2O7O8qqo4o3j3j2o2o2P6J88M6k16j70R3K72J61j04j04N8N7o7
-591H8o8o6o8R1R0llnmk0j32j43Q2K13j2j32k1K08R6k43k45KK27P8j45K2K47J60o5k93p0J42
-593HJ43J6k08j04J21J21j03j24J02J49p4j66n3J12J11l2l2O0O1p8p7R0R1q2q1J83J85o5k88
-594a4r1J33Q1l2q5q6MLR6R8k04k06J52J51KLR4K07m4k67j44Q1J34q9o2J62R5j31j86L9K17
-595A11oj34k3J25J25j12j11l4l3R6R8j03j05jK24J57o7k59l5J24J25j03k14n8J66J17j07
-596c7j52P3K01Q9j07j05N4N5j23j23J07J05N9j65m9J74Q1j43k28J46K42J7k52j40R1R1MM
-597c1NNq9q9R4R4p4p5Q6Q5q2q2R6R6l3j43p1J54R0k1n1O0M6M7k7k7k7k6m3m3N1N0MMMMo3
-598b2o4O0N9L8p4j46Q0J03qj62n1J73J72o4o4m7m9m8m9J45J45o1o0M7M7m6m7J6J6K2K3JJ13
-600A98N9j66k21LJ66J67m1k66j35Q9J47J45m6m6n1m9M3M2o7o8j1j2L0L1k6k5O2O2l0l2k4
-601g2k4L2L2Q8R0q0p9J05J06r4r4k9Q1nj16m9O5J12Jk2k2k2k1l9P3P4l8r1r2K6K6M0p1o5
-602a74o5J03J04RJ0R4R5mj16n7N4M8o5j4j3kj13l2J53J55l2j46l4K3K1m6m8Q4Q2r0r1P1P0
-603C4jj13j14jQ3Q3Q2Q3O5m8k16j04P8P8j10j10J34L20J04k34j53J09J04j57k40K2K77J65
-605B20j04j04R5R4l3l3k7k6j51l9J04J02m0l9Q4Q4j41k52PJ95J32j28k06j9J66J66Mj08l
-606@J08O2j25j83LJ66J68j44j42pJ04P1m1K9K9m4m5J1J2k8k8P6P7lj15j29R5O4m7r7J6R1
-607Dk0o3o3Q6Q5k7k5PPOOKKLKP2P3j16j14J07J08q0p9O8O9m2j52p3J51J38K5q2q2q8q9O2
-608a12O2O1O2j01j02Q6Q4J3J3r2r3K4J35R3j31q1L0O5O5K4K4K4K4o4o4pqn4n4N8N7k3k2Q8
-610H4R0n3n4n3n3J29J29n8n8o2o1o2o2LMLMj5j5R7R7j19j21O7O7M1M0p1p2P1O9m2m2J8J8
-611d2P4P4l7l6l6l7l9l9P3P3l1l2l2l2L4L4L3L5L3L3M7o6o8M5J50L8j09j09llM6M6n9n8j10
-612a10KJ13Kp5p5J05J04J3J4J3J4r9r7J4J3k2k3L4L4l0l0Q3Q2l4l3RJ21nj18j10Jn0n0K8
-614a62K13J53l5j68n5K9K7p6p7O7O8m6m5R7R7N6n8j06MM6M7k7k7k6k7J5J5O2O4q2j94j25
-615b76O2Q4Q4Q2Q4L6j50j57K9J85P2j14j14J22J23M8j39q0L0J3J3k1k1o5o6jJ85K42N5j09
-616B36j09rqo9o8o9o8J09J08N8j29o8J18J71j6k38j27J17J17o2o2L2J43L7j49j01J2J26J27
-617A59l5j46j23O5J46L5j09j09N2N3n9n9P2J84N9j28q5K7N9n1j01J2N4N3l2l3M0M1n2n3J5
-618d9J5J5J5j00j00O9O9K7K8K6K8RJ0J0J0J4J5J4J5q7q5M4M5Q7Q6j07j08n0J35J92Nj93j91
-619h7p3J15J60M9m4m5n1m9M2M3j6j5P1P1j08k20j01Q7J17Mj4j5R4R6JKl9l8r4r4K5K4Q2Q0
-621F0o3o5L0L0l1l0J00J01l8l8l9l7q1q1M7J60N5j68q2J43J84m0j68n6O8O7j16j17j00J24
-622a81J67J66o9p0j3j3p8p8J3J26N8j65j58O6J37J37N8N8n7n7m1P2J0k15k16J0K26J12j4
-623ij5Q0Q0k0k0rj21j92L2K37J25j54j53J17J16K3K3m8m9j04j04K6K7Q3Q2mmn8o0Q9R0m1
-624F5m1N4N4m0m0j52j52q0J45J47L4r1K3K62J51j70k81jK24O2j62j18J06R8j25q6K7M4M3
-625@M7M7m0l9m2P0R1j34j25R8J39q4j46j47J58J56LLn3n2M8M8J04J05j45j44j3j4M5M3M5
-626G2M5poM9N0n2n1n1n0l8l7R3R4m9n0m9n0J00J00o9o7L3L4L4L4q7q5PPO6O7j01j01K7K7
-628f1k9k9J08J07N1N2m5m4r0q8q9R9J18Pp2L9J64N2j83j81k1k0J4J5J08J08K3K4l3l3r3r3
-629a15P5P4q7q8Q0Q0L1L2k5k5k5k4L0L2m5m4m5m5J34J36p1p0RJ1O6O6n0n0j06j06ooQ8Q8
-630aq4q3Q5J96J06q1j26j2j8j8M4M6j6j5p1p2Q3Q2m7m9JJn5n6O1O0l4l4Q2Q0Q1Q1o5o5o5
-632B2o5kkR1R2j3j2j07j05P4P3j9j32j04Q3J26J5nnM4M5o2o2J3r9j97rK60K59N0j38m6O6
-633A29p5j85k8J59J11p6j26N9J10ln8n8MMllM8o2j61K6J58J57j05j04K4J36J29n8j24j1M0
-634E4p1j80o8J44K55k9k15r4J69J84lq7K6J5j72k63kK28K28p4p3k2k1R7R8P5j13k42n7J37
-635g6J36j32j32P0P0k4k4K4K4K4K3J5J3J4J5j9j8p4p5P3P3n8n8rrrj0J95J96J8k07j30R3
-637A2J11kj23j24P5P4P9Q0r0r0J05J05o4o4MLn1j62j07J18K41J8j51j52L8J50R4j30j79M5
-638a37J65J66o4o3M6M7m7m7n8n6jjQ2Q4m8m8m4m4M9M9j1j0j03j04M8M8M7M8M6M7q5q3N8N6
-639C2o5o6R7K10Ok18j25R9J55p0j57O6J27J5j25j4J85P3j83j81J7J6j0rQ3Q3l3l2K3K1kl
-640A5n8n9R7R7p0p0K3K3p1p0J60J61q0j91r6J30M3j82pK16K11j5k26j16N2N1L2L2k4k3J2
-641cJ1J2J2j13j13k0j9J20J19J22j02q8K4J78O6j34j33K5J37O7j58r3J8O4m8m1P1J73J75
-642C29o3o2q2q2j74j76P5P4Q1Q0J22K34J15k60l38j14J8J7L7L7R3R2K6K7Rj02q2J42J43q3
-644A33k00q8J16J15j01j02O7O6j05j07J61J60o8k92p2L02K08j6j10j09p8p9K5K49K32Pk34
-645H0j21rj0llJ15J15j28j27Q1P9m8j60j00J25J47L6k4k3K5K6K0J9K0K0q8q6OOL2L3n9o1
-646f5KJN7N7O2O2l1l2k7k7K9K9j14j13n8J30J90P8j28k40j28N9J54J52j6j6p1p3j3j4P3P3
-647D2J6r5q9q9R1R1O7m3l1Q0J68N6j15j14r0K2K4K4L2L1J4J4m2m2n1n2M2M0p6p8j7R6M1p2
-648a05j5R7M9o1o2N0Q2l0k9Q2P6l7r7r7N5N5%%m0m0J6J28J34n3k14k7J22J22j47j45J29J28
-650A26l5k22l8J49J36n0o6o5k1k2K7K6k9l0o0n9L4L4J38J37j05j05PPJ4J4N5J67Q6j02j32
-651A6j7OPM7J59O3k74l36JL27J38j67j68J39J39o9o8j2j2J8J8l8l9N7N6POo3N0J53l3j15
-652dlJ64k2k11j00K12K12k07l19M9L09Q9j73o7J20K7q4L5K24M9k13k13N0J65k1j00J2P9l3
-653B6q8K3P0m0q3J03J96Q5j98j96l8l8N5N6J3J3J3J4QPRQo8o9K5J36R7r1j03PO9m1r0R8J44
-654A32m2j93q2J79J79n8n7p0p0j4j5J14J15n5n4J10J10r7k08o7J20P7l5LJ15N9n3j48l6R9
-656E8J00j13j12k0R2M4j43o0J29K06n5k44n7J44J43j54j56R2K03M7j40j25j4Q0Q0M5M5p9
-657C6p8J3J24J0j77j54L4K23J11p0o9J0J0k1j33j9J68J84kj29j29k5k5L1L2J06J07o1o1K
-658D8LLLM1M2j5j5o9o7j3j2P8P9r0q9m7m8RRJ15J13j7j7P5P4r4r4K0K1K0K1j9j8j8j8opN0
-659E1N0j60j60Q4Q3J11J11J8J8j04j03j0j0J5J5J5J6j2j1j1j1O1O1l2l3RQj21j23N9N9N8
-661AN9K1K1j09j10j3j3Q1Q0O8O8o3o3K9K9j61j63l2J92J92l3q0p9P4P3k9k9K7K7j41j41K7
-662a90K7N8N8l5l6Q7Q7m4m3L8L8L9L8j5j5J15J16j11j11j10j12L8L8n7n6N9N8J14J15o5o6
-663E7rro5o6J02J03j2j2j05j06l5l6R5R5N5N5jjj08j09K2K2PPPOM2M2j3j4k9l0l0l0J89J91
-664B77j28j28j7j7j8j8P7P9K2K2n0m9n0m8l2l2l2l3J6J6J46J48l1l1l1l1p0p1R8R7n8n7n8
-666i2n9J16J14r0r1llllN7N7l5j47j15J11K38J27j3j25o8o9l5l5N8N9qqQ5Q5nnj36j36N2
-667a25N2N2N1m5m6M0M0L7p5n9J65J88l7l14k04J65J64l4k59q8K87K81N7o9o8j61j62l0J95
-668bK01k3j86p5J7J7mmnmL0L0J22J24j32j31L6L7j23j24J20J19K2K2K1K2k0j9p6p4O6O7J0
-669H1J1n8n8kkllllL6L5k1k0j8j8L8L8o0o0K7K6K0r2q5J03K09R7m5j58n1n3lmK1K2K1K1o1
-671g5o1P1O9O7O7J1J0J1J1j21j19J9J9J9J8l8l9J8J7L4L5r5r6J05J03o3o4JJN8N7m0l8J28
-672A00J30r1r1l5l3l4l3j5R8Q9r5k22l3K25K25L5j52j43M2R3R5j00r9K7K13J96Qj93j94O0
-673G3O0l4l4rqo3o5J17J18n1n1m5m4L0q2n4J33J76O6j49j47J4J4KKLKM0M1M2M1n0m9m9m9
-674e9q0q0N1N2L4L4k3k2J48J48j74j74J2K36J31r3k36j24O2O1O5O5m6m7n2n1O0O1P7P8l5
-676G9l4j30j31N7N7M7M7M6M7l7l8P5P5m9n0m9m9R7R8r0q8n6n5J31J32j54j55L0J43O3j59
-677a00j11J14J26r8k03K1K64J53j08j07j1j2j1j2K1K1K1K0k7k7K9K9J83J84k26l38n5J70
-678i0J55M4l1l1l8l7k2k3k3k3J45J45j15k26n0J75K29Oj84p2J12J13J3J4j00r8R4R5j5j27
-679C5r4J29J31r5j80o8M3M2M4M4M4M4j42j43M4M4Q8Q9k4k4l5l4KJ13J01q7k25k25R9K85P7
-680A22j84r3R4Q8r8j16P1J29J7o3o4j4j5Q5Q3Q5Q4q9q9K3K4m0m0J7J6k6k4k6k6P8P9K2K3
-681A33n7n7N5N6n0m9POp3p4L9L8M8N0o4o2O0O1n1j63j05Q4J46L3%JJ05J06j37j35j86j86
-683d21J32K44J10p6o3J24J66r5k26m0J75J76j77j76Q6Q4RQQQn4n3N7N8j6j7j7j5n5n4N8J69
-684A17R2r5j00Q7O2j26j76J0J68N7j30j30R7R6l3l4RJ0RRr0r0r1r0J33J34P7P7J5J5J5J5
-685A19o8o7K5K5n6n8K9K9Jj12n8J67L06Q2k08k08K2K3K1K2qqr4r4R6K08J41q4r9r8j9j9M2
-686@M1n1n2Q7Q7p4p3Q2J95O6j58j59O4Q1l1q6q5J%K8K7K6K7KJN8N8j00r9j00j00Q6Q7Q5Q7
-688A08q1p9q0q0J14J13j52j53M0K65J78m7p2M0j6j28j40Q4J81P0j14j13j07j07L0K54J38
-689A46q7j93L1J96Q5j15j15M6M6r2r4J80J82pj19n5n5j01j01J05K16M0j46j54m2P4P4P3P5
-690I3k7j38n2O1J21J0j18j18m3P1J01J00k3k2k1k2N2N4O0n1n2n1J01J03j0j24j22j0P2P2
-691F7q1q2QJ20O5m8n6n8L0K9J37J37J1j77k33m7J18J16OPOOo9o9K4K3m0m1J20J22o5j75k4
-692a13J62R9q9r7J5R5j6j39k7N0N0p4p4Q1Q0K4K4K8K8k9k9K2K2r7r8n6J31J37m9j32k0J40
-693D9J42p2j83n3O0R4R4k9k9p8p9Q2Q2O2n1j44l2P7P5m1l9k0R2M3o9q9K3M5M6N5N5M1j46
-695F3j81OJ19Qj84j84J27K39K3j64l8J50J23o4j40k9L2L1j8j8O0N9L2L2o9o7m5O8P3l9o1
-696e6o1Q2Q1j1j2J46J45k3j36j03Q5R2k1j26j24l1l2K0J30J74j4k08k09K7J40rj21L0K15
-697G0J60j77k27L3K34M8j81p0K23J10k39l53k1L18J52j08j32J31K03J6l9m0m4m4n4N7J3r8
-698e9r5R3J78qj15j16P9P7l0k9J00J00q9q8l2l3n5n5J07J05K5q7q8K5K5K4K5K4j4j28p4J51
-699e7J75n0j46l6J51M0j59m7K17K19k8k53j02J22O6j58j74N1J17J16N4N3klj45j44K4K3O9
-700gO7k3j35q2J43J35K3q1L2N9n3l6P7J18j06k08J7K07j6j59j61J07J06j03j04J39J39j24
-701b9j26J16K28Ok18r5J29J51p5j64n4l2l2O9O8J23J23q2q3j5j4p1p1M7M7J02J03j44j42
-703a35J61J61pk31p7J46R8j27j28R7J98k7k29j18R6R5RQm5m6m5m6J45J43o2o1J4J3J3J4l7
-704a0l8l7l8Q6Q6N6n6k8k6K1K3Q9R0m6j59j50l9N9N9j2j3Q1Q0k0k0P4P4K7K7o7o7n9n7n9
-705f9n9J04J02M3p0o2M7J05pj72o1P6P4r3r4J05J04K0r2k8k9M7M6M7M7NONNj05j03R3R4j6
-706A15j28m3O9K4q9%J12J4j72j17P1L6p7l0J57J94o7k26m0J77O2j34j36P3J85R1k1p2p2J4
-708c0J5m9m9n5N6P3P1j5j5mnonK7K7o5o6MLMMJ4J5q0p9J34J34kj12n6N7M3M2M5M5m9m9l4
-709a2l5K1J33J26o2k17k18J9K07Q2j04p4L9k9k9Q0J91J10p7j80o8O3O1J6J6J6J6l5l5l5l5
-710d9j9j9J49J50q2q1k5k5J7J8J8J8l8l7J7J8kkj25j26J34K45K8k33k15M9J65J64k9k8k9
-711B6k8N8N9RJ0m1P2O9j18j90mJ11jj50j51J23J24l0l0J26J26K0j69j67J9J29J31J1J1j16
-712C9j14J6J6rj0M6M6n3n4P7P6q1q2Q0P8L7p6m0J46N1k11k64jJ91P8j1j1P5P6j8j8L8L9r3
-714E9r2K4K3r4r5m5J43J56M4m9m9J00J01N0j37j88p6j5j5M8M8J36J37j45j43klkkk7k7J04
-715c3J04o1o0mnJ32J33p4p3J1J1j07j09l3J55J13j47k18l0J66J65KJn3n5qpJ22J24l6l6K0
-716A10K0m5m5J1J0J5J5P1P1p1p1p1o9k6k6J05J05n2n3n2n2M4M4M3M4q4q5J46J47n0k36j61
-717b48J03J37n0n5N8J48L6j00r9K6K5K5K6KKj20j22M1J53P6j11j09P8J24J2j01J0J33K2q0
-719D2p8J57J57j54j54o0o1j8j7P3J85J09j16j39k7J02J03k2k1r4r5P3P3L0L1m8O6J34r0k25
-720h4j14P9Q0pqP0P0n4n3J0J22O2j63j32k0P2P0p1p1J94J96N9j65k21MJ33J34r3k04j14J11
-721a08L3L4J2J3L3p8j65O0K67K68j29l53j43K32L55j9l46k35Q1J92J01j22o5M7K7K6l9m0
-722f1J6J6O9P0o1o0N4N5l9l9K3K4K3K3m1m0J5J6poM9N0j29j28P8P6k7k6k7k7o9o9O2O3R2
-723A8R4%%m7m7M7M6j00r9jJ10O4m9m8O2P2m1j00j02P6P4K0J9r2r3L8L8RRrJ02Q5j04j16m
-725f9J30K0q0p8N2N1m0m2K3K4p1p0J11J11J2r8p7L6k7k8M7J58J24j39j63K3K38J26j10k20
-726b6r8J5L0L0L7L7n1n2n2n2llR0R1L1L2L2L1P0O9k4k4j05j05j12%Q0P8ppMMp6p8n3J34J85
-727A52P4j10j09J4J5j46j48K6J39J19RP1P2o0j72r5R2J16p0j15j16m2P1J64J63mj91j15J48
-728d8J70j7k01q9J42J40k0k0l4l3l4l4K1K1L5p8j02J1J40J38j9j30q2L1Q0l3l8P5J30n8j38
-729g4k7J58J60m5j57p9L3J8J8n7n8l5P8J17Nj18pJ43J44r3k04l9J47J35j28k28j16J53J53
-731cO5m6J8J7%j%jn2n3L4L2K2r0r2K2N4N4NNL7L9L2L1K7q6q4K6N5N5l2l2q3q5p0J17J82n
-732A14j93q3J62J63Oj81o3J22J13p6j40j41R1R1J%%%k6k7m1P2R2k0j3j2N3o0j57L0J58J58
-733A93j78j78P0J81lj89j20J43J51l5r3J8P4P5m1m0J5J6j08j08O0O0MMr0r0R5R5KKl2l1R9
-735B1J00L7L7r5r4O8O9k5k5K0J9K0J9q3q2q2q2J78J80o4o3n0m8Q0Q2K3K3j45j45J18J18q7
-736D2q7l4l3K2K3JKN7N7k6k4L0L0n0m9n0n0K7K6Q2Q2O1O1j45j44p5p6N5N6L1L1L1L0L9L9
-737G2n5n4P7P7r2r0L9L9n3n4Q6Q4q2q3m6m7M7M7M8M7M8M9m0m0J7J6R6R5k23k23N5N4N5N3
-738A9P8P8n4j65%J85O1j28r0R6M0j46j24O3J10kl9P2O4j23j83NJ94Q3n8n7O5O6j4j3p0o9
-740e6j1j1J19J20j12j11j8j9P8P7K2K1j06j07O1O1l8l9R2R2ooo2o1L2L3o0o1K5K5K5K4M1
-741F4M1n3n2KMLMj03j03m8m7R7R6M1M0r1r2M0L9J06J04k6j38j08P9J34J35m1m1r5r7m6m6
-742a98M8M8N6N5N6N6N0N1m3m3q9q7q9q9O6O5O6O4K0J9K0K0q4q3J0J0P1P2k1k2o5o4J03J03
-743A52KKn5n4l7l6l7l7O7O6n6n7J08K22J8k07j01J21K07j69l48j24K33K31o2o1L1L2JKR5
-745A49R5p5p5p4p4Q0Q1j2j3n7n6n0n0Q7J99J38q6j96q3Q1Q2n9n9o0n9k0k0J11J11n4n4n5
-746a27n4J74J73mk28j49P7K04R2r9r9n0n0K0K1J13J15j2j1j1j1p2p1j6j5O6O5k8k6M7M8M8
-747A30M8j15j14n1n2J0J22O7j55j82M4J72O1KKmnm8m8J19J21j20j18J23J24j48j49J5K01
-748E2N2j34j31N7K24J12n7j69j19O8J49L7j10j09J4J4M1M0J27J28j18k30o2N0J3J2l6l7L5
-749h7L5L5L4k2k3O9P1QPPQj00r9R9R9q3j95k7Q6K0K0K7K6q5q7J46J45o2k48r6J66J92Nj03
-751a2QL1L2l1Q1Q2l2n4n5l1l0r5J8K5K5L2L1p6p7m7O5K0K0RJ20Q2j05j61K6K21J09j34k46
-752a49m1J46J38m8r3r4K5K6P1P1J5J6n8n6J41J42l5j48r7J4N1o0j22j21Q3Q3J39J39j16j15
-753e3k2k2K0K0l6l6l0l0K6K6K7K7K8K7p4p5p7J48J85P2j31j30K3K2K2K3PQJ37J39j67j67
-754f3L9L8RQK5J37l4k58r7J28J50p3k33j0K13R9j02j04J45J46k2k3jkr5r5o6o6J40J38n3
-755A8n3n3n3P6P6j6j8J10J11j33j33k3k3L3L3J4J4J4J4L5L5L5L6M0M0j27k38j50P5J84J84
-757A57l4l5l4l5n1n2NMn2n2M2M2OPp1M2J46p7j76o4P1P2P8P7N4N5l9l9k6k5k6k6J18J18n1
-758A29n0j01j02K9K9R0R0m1m1R2R3j06j07N8J70P9j46j99K5J15Mq5q4KKk2k2P2P1r8r9L2
-759a21L2p9q0Q7J99J25r9r1K0K0r0q4K8N7N6j4R8J36q9j49l7O7O6k0j9L1L1j37j38R2R2R1
-760H1R2m3m3m3m3O3O3o9o8J8J9P6P5j9j8j87j87J08J08k3k3K5K4l1l1M9M9N0M9m4m4m3m4
-762e4r2r1J14J15qrM7M8j5j4p0p1J1J1q3q3R5R5JKJ0J1O6O7n6n5P4P5K6K6j43j42n6n6J13
-763i1J12k1k0L5L5n0n1kkP3l7j16J10J94k9k63j52J95L05J03j22j26j3l5l3M3M3M4M4j13
-764F0j12J53J54K2k03j16J08M5o7j1J02L1j93j44Q1K22jk05r3N7N8l0l0J24J24j19j18J26
-765B5J26m2m2O8O8o4o4L3L2o1o1o2o3O8O7P3P3r6r5M8N0j19j20Q5Q3pj19j03J21J13KqJ03
-766A12R7j6j26j25L5L5k8k9K7K7N0N1ooo3o2o4o3J24J23ppM5M6m9m8N6N6p6p5N5N6p6p4o2
-768f7o3ooP5P4n6n6K7K7K7K7q2q3M8M9k9k9k9k9O6O6k8k8R1R0j08j09N1J62J03j23r4J7L3
-769HL4K3K3K3K4j40j40K6J38J02j21k10J6K35K36j42k53l8J86J30r4j28j5k3k3n4J71J77
-770A71m8j75o4J03J02l6l5l5l5N3N4p5p7J01J02RRq1q0J3J2n5n5JJO8O8k5k6J6J5m0m1ml
-771i2mmP3P2k2k1j42j43O3O4J23J22p7p5j6R5J59o6j54j54P5P5L5L4o9p1jJ12J10jm1m1m7
-773b9m8J3J3J3J3OOOOl3l2K4K3L1L1q0q1J7J7l2l2K8J40J40K8n6n7ppp7p8k8Q4J78J78K9
-774C47j58j52j50K5K4P1P1m1m0j09j08Q4J95J61M8o8o9o4o4o3o4P0P0l4l5k8Q3P8P7r4r3
-775c0n1O1P5l6r1K0J82P0j22j20O6O7j82j84P5K62Q3j05o5M6K8K8N5N5n7j69q6J01K06J9
-776B01j33j32r5J7J42J41L3q1j9R3j5j27r5R2N0o2m0P0N0k11k23KK60J46p7p7K7K8NMMMO2
-778D4O3m9n0j03j04Q3Q4K7K6q4q5j5j5R7R6j17j18P0O9O2O0n0n0l2l3Q1P9L7L7p5p4m8m7
-779a34O5O5R0R1r7r5J6J7j8j30m7J77J21j04n1O0J09lj42l1Q5Q6k3k3k3k3J7J7J7J7m2m2
-780B2m0m2Q3Q4k8k8j27j28N9O0k3k3L4L3O2O0ONj24j26O0J71O8j56j57O8K08R6q8q9N2N2
-781A04j28j29K7J37R6j27o0N3L1L2N0N0J5r7r1J32J83m3j96j95L4L3kjJ21J23l8j49r6J29
-782bJ49p5j39j41J14J13j7j6NNMNk7k8K8K8QRj52j54J13K24R6j29o7J56J00j24k05K0J16
-784A7Nm0P0J57M5j19j18NOj5j3j5j4L2L4k3k2J1J2J3J2j5j4M2M2k5k5p4p4KJ13R8j26n6J68
-785I6J62o2k04r1P4P4n9o0P0P1j02j02K8K9m5m5J61J60m0l9m0l8l2l3l2l2P5P4j8j8QQO4
-786F2O4n9o0L4L5j2j2j1j2%jN6N6l3l4k6k6r8J3J3J3k7Q5R2j9j70n8P8P7J5J5Q5k7k20j08
-788b20J40J39o6o7K7K6rrM6M7q5q7J4J5l8P4J75O3j81o7J72J73n3j65L0K9j73j74P4J85J8
-789E3r4jJ10k4j36oJ06L4p8k2Q9Qj03j1J01mj15J0J22P6j12j6R3l7k24j50J88K75J4j98q7
-790a39J24J22p6p5k3k3k4k3j5j5J09J09M8o4jjo0o1L3J44K0j66j58J04K29M2q0p9M6M5j22
-791c0j23L4L3L3L4L0L1k6k4KLKJp3p4q5J02Q8Q7j80j81J52J52J9K0l8m0N2N4M4M3q8q7PO
-792b0PPLLn3n3N4N2jkL0L2L1L2p3p2K0K0J9K0p3p5J91J91o2k86j89L7K34J1j12jJ27J28n3
-794A24n3j02j03J1J23J87l8j45j45J21J21j7j7j6j7N7N7j11j11j9j8L8L8M1M3q8q9N2N2m
-795b8mn8n8M2M3N8J69P9j46k64m0J75J74p7p6J6J7j11j12J63J61k2j33p3J51N3n9l8l7m9
-796h4m8M3J54J30r6q8K4P0m3o5o6K8K8P5P7M8o5j58m7Q9R0j09j10N1N1nj18L0K16O3j99k49
-797b83J4J64N1n7N5J15J16k3k2M8o5j19pJ28J29j65j63n9N4K5K4L1L1p6p7N4N5q8q7J8J30
-798d9J43J44J4r7j74o3J10J11r8r7L3J44O5j23q0L1l7j51j30N8J74J73Nj06m4m4NNM7M6O2
-800G7n1q6K5J54J54j28k40m6J41P9l4k9Q4P6l6r7r6N6N7N7N7m6m6m6m5l1l0j13j13jJ86J99
-801H8Q7p1p2Q3Q4p2j83j02Q6J29J7j14j14P2P2M8o3l7P4O8m4j27j27N3N3O8O7J32J9j35j33
-802i4M5M6qrM6M7r3r4Q6Q5%j11oJ05l4j45p5J12P3l8J7J29O9j18j17O9M8o3j08NJ11J10p0
-803B0o8m3m2jJ13J53M2p5p6j02j03l4J55J65k1j54m3J22J22o2j74p1M2R1k2m5m5O0O0O9O9
-805A02P7l6j10j08JJ12k6j38o8J19J52M2p2p0m3m4O3O1P1m1m7O4O2n1j55m3J52J52L6p7j75
-806c8j77L3K18J33j29j84P7K24L9j78j76J06J05p4p5J5J27P2m1J1J1j07j09N0M9M9N0QQQ
-807A05Qqrqqn5n4N7N8q6q5l1l0J02J01j1j0L2L3q0p9P8Q0l4l3K1K2l4l5j%j%rj0J01J03p1
-808A19p1j14j16j40M8K04K04r6r4J7J6ONM2J55R2r5j66n3N4n7j07NM5M5mmR3R4L8L9j3j2
-810A79o9o8kkn7n8J00J02j1j1j31j32n7J31K22J11p6p6r2r0l6l5P0P0P0P0q2q2k5k6R2R1
-811I0k0k1l0l0l1l1N8N6n3n5m0m0P3P3O7O8o3o3O7O6o4o4P7P7r1r0M7M8M8M8J6J5j76j76
-812a44NK29L8j87j22J02J81m3j32j32K3K2O5O5RRj%N5N5j9k0J12J11j96j96J0RnnnnM5M6
-813b1j1j1j56j56K2K48K47K3q0p9k1j9k1k0N1N0noN3N2j17j15O1O1NNn5n7P4P5K7K8o6o6
-815@q3q5RRJ52J53r0r0k7k8k8k7N6N7J83m2j35j36J9J8L4L4J27J27o4o4qpm0l8m0l9P1P0
-816D8k2k3J15J14j29j28lmq3q3k3K03J46p9j22j23L2L1R8R6p1p1NOO2O1K7K8j03j02l7l7
-817a71k2k3NK28J50p6k31oJ70J71q9q9l1l3o3o2O8O9L0K9k5k6M3M5M4M4r6r5lkL1L1L1L2
-818G8K8K8k8k9o2o1L2L1J3J3m3m3m2m1N2N2m9n0Q1Q1k7k6k8k7K0K0J9J9r8r8o4J62J46L5
-820I4r4r3L9L9L8L9KJJKj3j3M3M3k5k5k5k5N9N9p2p3o7o9K5K5J52J53j28j27k3k4L3L2LK
-821a2l6K1J36K5j44j46O2J72N0o3q8K3K3q8k8Q4Q0l2m2J1J3m2PJ18J58k9j54j53l0l1M2R8
-822EQ1l1o9M1O4Pn4JL7p6o8M4R8j2j01J1J40Q5r3r2kkq4q4J21J21l3l3N7N7p8j33l8P4J3
-824b6m4J2O8j2j25o9M3J06M8L2L1K6K5o5o4J1O7N0o3q8K3P8K2j09j10N2N1l4r2KJ14J07n
-825F2k8k8k8l0N7J15Rj78j75J3J16J15lmk1k2k2k2n7n6J08J08m5j03K1J32Q4j39j34k1N0
-826a26o2o2N0J72N9l8l9PPm9m9P7P6n3n5R3R3l7l8j6j4L9M1j03j05J32J31Lj10j24J00M7
-827D7o4j08NQ6Q5%jL2L3j36j36R8R8l3l2M2M2n2n0J35J36p0p1j2j3j3j3L2L3o2o1K5K5L2
-829E9L2L0J43J3k11j70N5J47p7j37Q8K15J04j01j02j07j08J0J0J03J03K7K6j65j65o3J63
-830g8J76m8j42Q2J68n7j94q3J22J20n7n6L7L6j13j13J98J97r7k09nK18M7j76q4J40J74n2
-831A51m8m9l3j44r1J33J29r5j50l8J30J29l1l2j02j01O8O7J4J4J4J4R8R8l3l2nnnnl6l4l6
-832d6l5Q2Q2m9m7PPQPK3K2l4l3M6M7m7m6J35J35j45j44J9J9Lj08o2J62J56p0p0p0k8k8K6
-833g6K7Q2Q3j2j3o8o7L3L2L3L3o9o8j3j2J10J11Qk17j68N7K56L1j43l1J34J35j30j29P5P7
-834A01j11j11N7N7QRRJ0j3j2j43j44J00J00J55J56j11j10j10j11R0R1llL9L8L9L9j56j57
-836a97N0N0K7K7k9k9P5P4n5n5J4J4J5J4O0O1O1O2j10j09Q4Q5m2k30j74J4J44J44K5K6P9P9
-837B54j65j64Q3Q3q0j93l1K30K22j16k41n5O2O2j2j3M4M2NMR9R8j30j29l7l6P3P1P3P2k9
-838A46k9j12j10j25O3J64J62o1o1nolln2n2jJ10J09p8j48L8J64k3k02r1J16J14j10j11J33
-839f4J31K0K0p3p3l4l4N9N9j08j09N9O0q3q4J98J97p6p5k1R2l5k21n8J30J04q4k7J59J05
-840A34q2j28j7P3l8l2Q0R3R4j05j04M1M3j4j4k1j9k1k0N7N7l5l5K6K8k9k8RQj7j9n0n0J19
-842a6J17l9l8N5N5r4r3%%M5M3m8m9J2J2J05J06j13j12j9j9k6k6j9j9N0J61K32M5j92j90l5
-843a09J52N0o2m3m3k3k3L3L3R8R8ONj66j65P7P8M6M7rrP0P1o2o1n4n3L9L9KKN8N9j20j19
-844e8J1J2p3p3k1J66J38n0j25j5J63J64L9j48k49j37L7J48J08lL8L9r2r1L9L8M4M4n0m9j9
-845b5j8m7m7J09J08q9r0pJ05J04pK0J9K7q6j44l4J02J03q3q2P8P9l1j43j30N8J11J10m5m5
-847b0n5n5M3J55J39K6k10k10p7J11J61N0k5k5R9R9j09j08K1K2l1l0K6K5k3k3J00J00n0j62
-848c6o9M3O4O6O1O1M7j40j57j59M5J57J70j6j29j27J28J29J8j68j20O7J03qn9N1Q8k5n5n5
-849b5M3o8j25j3Q8Q9p4p3J36J36o1k47j11J50J97Rj08LJ00q5k50o3K45K43Lj09P8P9r3k04
-850a10k0J66K4k38j45J17K37N1p2p0L5L4L5L5l3l3q8q9R9R8J00R9j41j40n2J34J46m1j55
-851a7m4N9N9k8k7N6N7j01r9m8J38J40m8j21j22J10J09j03j05K7K7M3M2j2j3n3n2l9J48J79
-852A62pj71j71O7O8O6O8oooor4r5P3P3J0J0j21j21RJ0K15K16j23j22o6o7MMJ34J35m0m1J6
-854G7J5k2k2k2k2M4M4L3L2M6j41j92q0J33J32k8k8J2J4J4J3K2K2K1K2p8p7p7p8K5K6Q1Q1
-855D2K6K7j41j42K3K3P9P8lmmml0l2O2O2l7l6J8J9j09j10K5J38O0n1j01J2N4N4MNO6O5l2
-856A06j44j13jR9R7K7K8Mj07q4K9J90P8j70j68L0J41M7j40r1K1P0P0P7P7m4m4J2J2j62j62
-857b15JJ89L9j47q7J00J00j4n7N4L7L6L7L7Jj11j12JQ1P9P6P5m6k33j23J39K02n8j42M4K47
-858B30O1k46k46qJ04N5n8p0M2O5O5mnnmN0N2N2N1o2o1o8M2k3k2j6j6J9J9J8J9p5p6O1J71
-860A11R1k2k6Q6J6j72j70J5J35K3m0m0M8o3o3J25K05J9k21k20J66J67l4k21n6J32J26o1j42
-861h6l2J30J30k8j39n4N9J00j2p1p3P4P4q9k02k9K34K39N4j38j38N7N7j03j02mJ07R6j6m0
-862E5m0l4l5K1K1q4q3k2R0M7o6j08Q0J57M4p8p9O3J74J19Oj15j15r1K0J30J30l5j49j19r
-863a05J58J58J7r4j02J0M5o7o7M6O2m8l4l4L0L0o2o3M6M6j1j0M9M8M9M9k1k0k0k1l2l2l1
-865c1l2j8j8M3J55R0k3p2M1J36J35j01k14j00Q5M3o8j61m9J25J24j9j8NJ17L1q1o8o7n0n1
-866a11n7N5R7R6M1M1n3j65j25O2J02q6j42M6K64P8j98j98J47J46m9k37j9K43J89Jm3m4l7
-867D4j49o6J20K07K0r8r6Q9R1lj15n7N3J1J2J2J2j8j30j72J5K16K15O0j28j97q4k2k1m4O9
-868a54R9R8l3l3l4l4P5P5O8O8l6j49j47l6O5O6P2P3j31j33l8J49J49L8J9J8p2p1q5K6Lj09
-869a34n4O0J35K5l6l7O8O8J3J2m5m5n9N2R3j9o9M4K8K8j32j34M3M4M3M2k4k3q1q0O7O7O6
-870B6O7J08J08j97j96m1J83J35r1j71o0J07J05l2l1K4K4k5k6L0L0j34j35L2J44J18j05m2
-872d5O9P8l4K9K9j9j30j95L0J33J31N2N3o6o7o5o6l0l0K6K7M3M3n0n0M4M5L7L7K8q5k04K1
-873a81J26J25j03j03M3M3M3M2J10J10j72j70J7J6Jj12p8J48J71N9MNn8n9N4N4kkj18j16N2
-874e1N1j15j16N0J63J06j17n5N7P2m0o2o3R8R6MLj00j02R7R7M6o7j22j0O1O1n5n6l4P9P8
-875E4l4r0r0J01J00L9p4k3Q7j0j22j15mN3N2N9N9j12j13n7J31R6j6j2J00J00j2m4m3j5j26
-876h1j21O7J72O0l4l4o1o3m9J39J34n4r9J3P3l8j40M6J86jj90p8J12J10j25j25J21J19n3
-877Fj64K3J35M1p0l2Q0J0J0L3L3o1n9m3m3J3J3N2N0N8n4m9n1L6L5N6N6M8M9m4j57r9J3LM
-879f9O6J79Q8j00j92oJ17Nq8q7O1N9N4N4M0p3j34k3J31K0p8p7J11J11j32j31J62J63p4p3
-880H4kJ11qj95j26j3rj21o9J94J93o8j78o7K11K09p1p1j4j5M9N0N0M9r4r3l8l8J02J04o5
-881E1o4n5n4P6P6jj%jJKonMj08j01Q6J97Q5j51j50N2J64J14p4j24j24nmJ1J2R7R8k0j31j26
-883a79O2P9l5j27N9K27J15j66j64M3M4M3M4J7J7m0l9P4P4N5j32j46l5R0Q8l9j51l7J51J16
-884A08p1j58K8J82P0j72j74J27J25m3m1M3M4j2j2l1l0K4K5R6R6j73j72q0J07P1m0o2N1j3
-885h7j2n1O1J21J22j2j25j80o9J74J74Qj05j9R2k5k11j75Q9J98Q5p2p4N1N0N9N8k8k9o8M2
-886D2N0o2k00q8J53J52Oj05n7N6J18Oj21j23RJ21J20Qk5k6k5k5m4O7R8R9j19j19n8N4R6j6
-887D2p7p7Q7Q6N7n6j8j9k5k5n8n8m7m6K0K08K49j2k41k42J8K05P9j06m7J40J66N4m1m0p6
-888A00p5p5p6O1O1O0O1k8k8k8k8J2J2J3J2n2n1M6J58N9n3n8N5L7j50j98j2J89J91p9p9o9
-890a2o9p2J53J85P3j68j67M1L9j5j5J29J29p4j85k8J97P4j52j92L3L0K9J6J28J04j20j69
-891g8n7P2P0n8o0J02J01q3j95o7J59J87l6l4l3J0j01j23J02K08j5j81o9K20K22n3n3m0m0
-892G7l9l9J0J1j12j13N4J66J06j19j46l4R4R3ppM8M8m9m8m9n0J08J09n9n9L4L5n8n8PPJ00
-893F1J01nmj36j34M3M4M3M3J6J5l3l4J7J29J05j19k14j03O3O3L9L7L9L9j07j07K4K4O2O3
-894G4l1l1L4L5n9n8m0m0J6J6lkN3N3q9q9M6J58Q9k4m8m7K2K3l3l3p5p5j4R8J39K6lmRj04
-896a1j46M1J44J44q8q7j3j3j3j3O9P0o1o0q4q4J4J27J21Rn1O1O7j20k06k0J42J42q9r0J10
-897A2J12n7n7O2O2j68j70O7K53N6j33o0M9nj18k2J65P2j16n6N4Mj08p0J92J89j50l33p2K54
-898i2K53n3k39q8J75J43m3j94j96Q0J93J36K4J7J7p7p5l1Q0L3q0o3M8L4L5J00J01J1j76k10
-899a37k3J28J7j05j04J25J24K7q4JJ12N9n5p7p7O6O5P2l9o6o5m5m5q1q0J21K32J51j11j55
-900d9L1J41J42r0k02q4J03J09kq5q3r8J4J24J23j04j05J1J24Mj06L9K25P2j90k56OJ93Q1
-901H8o4M9J72O0j56j56k8Q4J9r4q7K6M5M4p7p9R9R8Oj06j07Q0J36n1j44l2R9R8r1r2J14K26
-903A79J5j72j22j0N8N6O5O5k5k5K4K4Mj09j28N7J69N7j79j79kJ10J10km8m8P5P6N8N8p3j84
-904d6j37N0J36J38j4j26r7J5N1N1KKP4P4j9k0%JO3m8j55j55k7Q6J27J6m5m5j5j5M2M0J1J1
-905B6m4m5j0rP6P6m7j58j15P3J52L9j5R5J67k1l19k08J31K44K4j63KJ87R0r7j11JR5R5l2
-906A79l2j55j56m8O5K9L0K1K0Q3k8l0l0N5N7K4K3Q8k6j80j81N5J67P8j10j55m2RJ0L5J46
-907AJ03q4j40M7J67N6p5p5P1P2k3k2l1l1l7l8J2r9j28j5J48J47q1q1oJ06j3j4P0P2r0r1j1
-909a13J00J3r7p2M0R0k3%jK1K1O6O8k7k6n8n6L7L5L7L6k0k0O4O3l1l0j21j22RRlkN4N3O7
-910F1O7k7k6p4p3j03j02J35J35M1M1N1N0lj16r6J27K13J00j54l78k03J72L01P7j67j65ll
-911a22llM3M3q9q8O7O8J1J1J18J20j18j17M8J58O2j64r0K1M1p0l8P5J7r3K3J35Q0l3j2J00
-912B01L3j93j51m0N1N1N6N7l7l6N4N5%j11j08J16J72n3j11KJ19Oj29j28O8J79J20j06k71
-914a34j59J33K44J1k13l3J90K34Rj13j14p0p1M5M4J7J7J4J3M3M2p5p4N6N7m9m9p6p8J41J41
-915A43k5j36j4K11j5k40j48K26K36j38l51K4K79N4j47l6J93Q1j24j23P4P4l6l6k3k1j35R1
-916f2K32J21j89j89Q5Q4kjr5r5m8m7J21J19k9k8kjl5l4R5R7j28j29P7P7q5q4J52J51p5j87
-917a34n3J73Q9k3p6p6JJJJq5q6J82J80N7j67j04PP0O9m7m7J8J29J44q1j50l8J52M1j68j70
-918a90J43J41L1L0K4K4j42k53K5K49J19j05j84M0J04J06q6q6J5J5J6J5qqj38j40L2L1L2L2
-919a16j6j6L7J50J77m8j51j50P3J85Q7j38j02J0N7n2p2M1R6j6j22j1J87P6j09j08R0R0r7
-920C2r6m1m1OOJ36J38o4o3pol9l9l9l9K3K2J54J54p6p6J8J8j35j37J05K16n8k83o5L08K24
-922B56j51j87L6O4j59j60O5K48K4q0L1J74n0j85p4J09J09K2K3NOq8q8J13J13j31j29J21J22
-923A59j14j14J0J21m5k68o9J57K04j9j16mQ7Q7J5J5J5J5m3m4m3m3Q9Q9m2m1k7k7L0L0RJ0
-924H3m7m6O1O2o9o8m6m6l8l9P0J81J31n6j36j37N7N8P2P2r6r5M6M4M6M5n9n7llJ04J05o4
-925A32o4Q8Q8jj88j72J5J29J7m8m9n5n6LKLKO6O5J21J22j10j10J21J22K7j61k12r9M2M3N0
-926f7N0O8O8r3r2m0P2J21o6j02J1J28J8r0r0mll2l2J37J36j00j00L0J42Q2j06j12%K8K9k1
-928c0k1M4M4j1j2n6n7L7L7K3K2p0p1nmN1N2q5q4J96J97j19j19J3J2j9j8L1L0n2j64p3J52
-929a29J64n8j13%J16J15j06j06oK18J63o2j84j83M6M6llQ8K01Lk21j94L1K25J14q9q9J1J0
-930Ej6j7N9N9ML%jj%NNn1n1J6J5R6R5P2j53k53k8K04R4j49j47J24J23j%K6J40k8k51j60O4
-931i8J17Oo5o5N8N8M5M4j1j2p1p1K2K2M0M1n3n2O0O1l3l3poJ4r7r1J35J54o9j27j28O4O5
-933h3K7K8N4N6o0o0l2l2j0rQ4Q4N4N5l9m0K1K1l5l5ooooj3j2M3M4M3M2J5k10j56O8K97P3
-934B59j44j44J0Rl0l0O4O3j09j10R7R5j27j29P8P7N7N6J05J06o2j75q2J41R8j27j05OJ2J3
-935b8L9M0rj21o8J56J42q4j76M8K43J9j59j58Q1Q0N3N3nmj73j74R4R5l8l7J38J39l1l0l9
-936H6l8j93j94M4K68J68k04l32M3L04J89j39j39R7R6n3n1LMqrM8M7l6l6R3R4m1m1o9o8J1
-938e6J2N9O1n3j64j04J21J77O5j37j39P9P8P7P9j04j02nJ07J15Kj26j26j4R8R8j3j11j11
-939a37J4J3LLO0N8o2o4L1L0K4K5L0L1n6N6K18J05k32l44n3K08P6j09k5K35J50j87l04m2J78
-940f7O6JKJ07q0k06r5J58J58lmO0N9j39j39J1J23P5l8m5O8O0n2l8l8M2M2Nj07j08NQ1Q0j05
-941f1j07L6K22J67k1j42j42m9O4J04J04J4r9l4P9L2j55k46n9J80J79J8J7J7J7q3q3k7k7k7
-942a12k6q2q3J38J37Oj06n7J30J85jj42l2Q7k4j57j58N3J65J38J39k2k3n3n3LLn3n2J15J15
-944A78k11k13MK28J08j15l2l2L6L7L5L6j1j0j1j0KKKLJ22J23j21j22j12j13R4R3p2p2J56
-945BJ58O8j58l1l1p5p6R3R2N7N8JKk8k8k8k8rrrrJ6J7p6p7Q5Q5m5m5l9m0P8P6J22j03j06
-946d0j08J24J22qqo3o2O8O8lllmN1N1q0q1m9n0n0n0M9M8M9M7l4l5K1K0N9O0p2p1O8O9J2J3
-948A25j37j37r6J30J14J14llk1k2k1k2j1j0j8j7L0q3q2L0J81J82r2k04m5J41R3k0r1r1K6
-949f0K6Q4k7r4r4O5O6RJ0N2N4L1q2l5P7J27J4k08k07j0J79P6l6q6K5P5l6o0o0J2J2n8N4K00
-950I5Q8j22j22N3N1m1m0L5L4n8j71k4J64J13Km5m4m0m0rJ78J02j60j97j0J75O2k9l0R4R4
-951A58j65j65M5J56Q2l1j7j7llllk0j8k0j9K9K9k6k6J07J08o1o0Q0Q0rj97j54L3J47L5j9
-952E3j8O8O8l2l1K4K5m2m2m3m1o9p0K5K4n0m9Q2Q1m9n0M5M4M2M1j64j64J8J8J87J86p5p4
-954c2J7J29J5k08k02K2J85J83L0L0p8p8p7p8N8N8N0N2Nj05r0J34J19j05j91L3K10R8j80j79
-955a75J07J06J3J3j0j0rj0J7J7j13j14J20J18p9q0j4R8Ok17r5J30J46L4m0m0m7m7J03J02
-956C0M7M7n6n5L9L8k1k1L5L5ooo3o1N1N2N2N1j07j07j4j4L2L1L2L2o0n8o0n9J2J2J06J05
-957G1kkjkK6K6j05j04M2M2qqj42l0J06J05M3o9k0R1K09R6j14j14k1k0j13k27j13P5J95Q2
-959fL9M0M6o5j64n3M6M5mnnmP5P4j1j1M1J54L9j49j69J8J00j0j88p7O0N9%%J60J62l3j46
-960E8q8K3l3l4L0J41N3j34j83MJ81J81n0j62j21O7J10jM7M7N4n9r1K1P7l5j67n6J10J10p3
-961B7j84n3N9N1N2k8k7p3M0J38J39m3j55o2N1K7K8k2k2q2q1Q7Q7L5L5L5L6rrrrk9k9k8k9
-962e6llJ15J17m0k26j03Q5J29J7l4P8J05qj43j43M4M4M4M4L1L1o3o2j3j4j00j01J4J25J25
-964C6J3j23j24L8J50Q1j06j51l8J26J24L2L2J00j3j85j86J41K53L0k30q8R9R1r7p9L3J52
-965A11M0o1o0o7o8J15J15K6j61p7J10J10p7j74J2J43m3j55L2J83P2p4p3M8N0p4p4R4R4m1
-966G6m2K2K2j77o5K20K21j06k17L7K23L9k97j95O8J39K7n8N5O5m5j02J1J14Mr4r6Q1Q0K4
-967C4K5PPq6q7j4j4M3M2J05J05o3o3L4L4J0j01o1N1N6n7p3J11J41m6k08r7J77J77J8r5lm
-968A05k1k2n0m9l5l5N9N8rrM5M7k7k6j07j08p7J10J73j4k19j08J67J65l7j51n7N5N5N6J43
-969G7J44M1j47j35j35m2m2J58J57N6n5N6N7J0j03n3N9rj21k8Q4O2n1n0O1K0r1j14jP1P1n3
-971d6n3m8m9M5M5m2m1J85J85kk63j45J18J75j1j32N4J23J2j19j20Q2Q0J02J03j03k13j05
-972a83J58K12K5j60m8R2R3p0o9j6j6p0p2R6R6kj13r8J5J13J12q5q5RRJ5J6P1P2J3J4m3m3
-973E8K1K2j10j10J5J4M3M2l3l4noJ01J03k9k9n2n1l5P6R6j29j52m0O7O8J8J8O8O8o3o1Q3
-974D2Q5j6j6o2j74q3J41K09j6k44k0J90J91j51j50R6R7j09j07O9O8k5k4k3k4k3k3O0N9j08
-975i1j09M5M5j10j10J31L56R9k76j64O2J75m9l5P6Q3j40j08J16J72n2l14r0K75K75K5K4l1
-976B80l2j56j55q4J42R2j9KKn3n2n3n3N8N8Q5Q6m0m0J4J26L3j93j92L2J71O0j07j06J02J03
-978A11r7r5M1J52P2j17j50l9M8M8P8l3q9K3P4P4j16j18M1J52K8q3j5R6N0j37j22O5J04qj03
-979f5j03K0K0J11J09N9j28j42M5J70J71j04j05j0j1qrJ11J12q2k67j54J08J99J2j45j47J17
-980a16J17J9r3j2R8R3j9j13j14M7M8l3l3K8J39Q1l2j7j8j03j04q6J02J36K4o9p0R3R2K6q8
-981B3l5l6m4m3J1J2O8O7L0K9j00j01m3m3N1N1OOR2R2O3n0j43l2K4K4k6k6J16J16J1j02q9
-982b1r0r7r7Q9Q9Q9Q8j3j4j4j2LMn2n2KKKKm6m6Q3J95J61o3k97j86N1K76J21j03j15lN1N0
-984C7k0k0k1k0O8P0o1o1J14J16n4n3n0n0Q0Q1ono3o2J30J29m9k73j82M2K72M7j53j53J51
-985a9J50ppj4j5m6j58j35Q9J38K4k8k8P1P3k1k1K8K8j39j41O8O8k6k6Q5Q4Q6Q5o4o5qqn7
-986D4n6n7n8O3O2OOp3p5N7N6j7j8L6J48N7j67k16QJ24J23o7o8J33J35r7r7p4J13P1m1r0r1
-987a20m3m2j5j6P8P9P6P4n5n4R2R3m2j54j00J2L6L6L4L4R7j5m2m3OOk5k7k6k7k3k3k3k3L0
-989a55L1L0L0Q2Q3R0k2p2p1p8p8J24J23K6q7l3Q0O6j22j42l1mno6M7J77O5o1o0j2j1l3l3
-990a22O0O1PQO5O4m3m3m2m2RQRQJ28J29p8j90j59K9Q0l2l7P5J23J1o3o2qpKJ13J06q0j36
-991d9k5J44J44o2o1J00J00q0j93o1N0l6l7pJ04K3q9L5J49M0j48j51L4J48l9j57K9J70J71
-992B46o2o1k3k4j09j11M1J53J40m8j33j33J24J24L1j56j22rQ6k7p6L7J24J25j11j11J9J8
-993d8P4P5k8k8k7k7R7R7j08j08n6n7L8L7J19J19j86j88KJ89J32n5q0q2q1q2k9J59J71O0k5
-995G4k4q7q8j0j0j1j0P7P8j7j28p7J11J66k0j87p5J68J68l2l2l2l1N3N3klo8o8K6K5N9N9
-996A05O0N9j24j24l0l1l2l2J37J36l8l7N7N7o2o2o0o2m8m9Q3Q3O2O2l1l0r1r1P5J86%k24
-997i6j85J90L36J12k07k05N3N2mlL0L1KKj11j12j9j8J43J43J2J2o5o5r1r3J39J39o7o6N6
-998D5N7l7l7MMO1O0j41j40K7K8O5O5RRj00j01K8J40J80m5k18j06R1R0o2o4J06K19J5k09k09
-999a66J5J81P0j2j2L7L8o7o6l7l9N9N9l4l3m6m5J1J1Q4Q6qqo3o2o3o2R1R0l9m0J2J3q1q1
-1001b07R2R2L7p3o6J58J02j22p3L9L8p3j00J24P4j48j50P6K41J29j10j08N1N2j9j8L8L7j00
-1002A3r9ooJ8J8M6M5j5j4M0M0L1L1o3o3j06j07K4K4M1M1O8O9l6l5J3J3pj18j20pJ25J25l6
-1003a3j48n8J30J86kj68n8J11J11q8q7M3M3P4P3J8J7j19j19N0M8J6J7m0l9j3j4P9Q1J7J7
-1004A65p7p7o7o8K5K6P6P7j7j6M6M7j5j25j51l7R8R7p3p4Q8Q7J1j00o6o7p6p6k0J67K74J62
-1006B44j1j24j29j7M2M3QPp8p9l5P7N5n6q2L1J54M3m6m6J08J09m1j54l3l5l7l8R4R3k1k1
-1007B5L5L5P9P9j28j27j41j42O4J77J51l6j55m3J19J17q0q0k7k7J05J03p4p3N7N7ooo1o2
-1008f5l1l0J00J00j6j5j5j6PPPPk7k6k6k7R2R3l9j49q8R9J55J56r1r2r0r2MLJ33J34j34j33
-1009a05L5L5j3j2M4M3k3k3k4k4L0L0K9L0RRm7m7M9N0m4m4k3k3k3k3K2K1K1K1N5N6l7l8MM
-1011B4n1n3R0R0p1p0L5J46R6r1j04j02J6J7j04j03O6O5Q1P9n0n0MLMLJ30J32j81j80R6K08
-1012A75M2j83q3J39Q5j41j09J14J71n4l06q2J34J32r7r8O8J79N3j71j65O0Q4Q3NMPPq5q7
-1013a19P2P2P3P2j25j25OOK1K2P7P8q9q7NNP7P8j6j6j25j26n4J72J93Q2j60j59k3k4J07J07
-1014G7JKn5n3NNONo9o9K6K5Q7Q6opJ5J5m1m1k8k9l0k9L8L8L8L8Q8Q7j56j55J7J6l2l2k0R4
-1016d3J62o2j12kN3N2j4j5M3M2m0l9J7J7r9j01m4m4J23J23K4q6PJ18J13%o9o9j9k0K2K3j
-1017F0j13m4O9O8m2q7K5J19Oj63n2J22J21p0o8jJ10%JQQq2q2M2M1K0r0m2P1O6m5l8P2N6N6
-1018A22o8o7P2P3J8j70j50l8R4R3L7L9J01j1q0q0OOk3k3J00J01j08k19o3J24J50L7J2J2n3
-1019D4j64q4J04J90P8j59j57n7N6J24J22N4N4m5j58j08MJ31J33pj20j18pP2P1j4j4L8L8J5
-1021A16r7j85p4J68J67p4j85l3J53J45m2j19pK8K8k1k1Q9R0m1m1k8k8k8k8Q0Q1q0p9rJ02
-1022B7J04rn4n4n2n4K3J35J34n4k35m9J15J14j68j68P5J86L2j54LJ91J81q0j90p8N8N8J0
-1023D7Rr7r8P1O9p2p2M9K36J17j45j92mO5m7l7J49K39k3k46j33O0N9j01j02Q3Q3K7K6J1J1
-1024D2q2q4J69J70m1j53j06NK9K9P8Q0J1j01o1o1o1o2N6J67M4o8l4P6P0m3n3n2lmk9k9O5
-1025c6O4J5J6J6J5m7m7m7m8Q5Q4J7r5j8j7j8j7nJ07J07np9p9K6K5q1q2L5J47J24J2j05j05
-1027c6K1K1q4q4PJ19J26J3q4K8K8q4j03RJ25J26m9m9m3m1p2M1J52M1k37k38P8L40J41j21
-1028I1p4J14N2j35j76Q6K44N9k25k25LJ14n4n4J39K50J4k47k55PK44J31j2j2k0j9p8p9J01
-1029a6J01L3q0p1p3MLJ15J16l1l2l1l2m7m8N8N6l2j46qJ79R9j3n1n1k0k1l6P6O9m4j48l6
-1030a58J38J37m3m2llrj0J29J6j08j08N4N3n1n2m5O7MMk6k6k7k6J58J58k9j41n0J35Q5j03
-1031G8j69J7Q6Q8m2m1J4J5o5o5n9n9O2J73J12p7j05OJ05nn2n0N3N4p8p8k3k2Q7Q6M4o8j00
-1033g8J2J28J29j17j16nnk2k2Q3Q2J3r9KJ12P9j09j71n9Q8Q7N3n9j49l6Q0Q0K1K2K2K2m3
-1034B5m2m2m3P9P8k6k6K7J39Q0j07j71J5Q0l2j19pJ04qo8M3R9j4j29j7J62N0j91j92J38K50
-1035A35P4j14p2M1l7j49j36k3N0J64K25J14j78j76PJ19Oj05JJ13Q2j07j12jJ7J7J05J06m1
-1036A25k28o8J20J58M6m7m7l4l2l4l3O9O9O2O3m2j53o8M5J0j03r6J7J19J18m2m3j8j7P7P5
-1037F8o7o7K6K6J8J8J9J8k9l0K7K7l6l6j3R9K6q7l0Q2K9q2j24O3J35K4j06j07PQO4O3n7n8
-1039h2LJ15J51M0n9n9r9r8p6L7R5j8j04QJ22J22jkn8n8L4L5n1n2L7J49Q0j83j96rJ77O6o6
-1040@o4J22J24n7j68o4o4j0J03J36K4j41j42Q3J94J44m3p5p4QQr4r5O7O6L9p2q7J37J36K4
-1041A65o8o8K1K2p2p1L5L6k1k0k6k6O7O7j9j9p4p5J55J55q8q7k0k0k0k1N7N6N7N7o0o1j15
-1042a01j17J31J30%%N3N4m0m0oon5n5J3J24L4j90j69N6J55M1q6K6J49L7j37j35R2R2l9j51
-1043a40n4J71P2m0l2P9O7m6j01J1Q3k8q8q9J15J14N8N9j38j38j71N4J24J24o7o8O6O6J0J0
-1045H3l6l7K0J9j02j03J03J02J4J4p2p2R6K09M3j83l05q1K02K01l0j40q1J43N6n6j12
-1046a05
##$OBSERVED INTEGRALS=	(X Y Z)
(7.5627413627048678535, 8.3660568376207944397, 1)
(5.2042387861044234754, 5.9996398228438359013, 1.9414189557136083408)
(3.5026345781544345748, 4.250548985834776694, 1.9499767820786140238)
(2.8892656194747914356, 3.4788912636248996435, 1.9148074269273653858)
(2.5381317514967989268, 2.8978452072845195531, 3.3897795627944860009)
(2.2374560746028535618, 2.5333033829627353839, 2.8111828594368417633)
##END=	
##END=	
